# Supplementary material for: Comprehensive 16s rRNA sequencing and metabolomics to investigate the effect of anticancer bioactive peptides combined with oxaliplatin on gastric cancer
Source: Research Square preprint supplement (doi:10.21203/rs.3.rs-6875583/v1), 2025-07-22
Supplement: Supplementary file 1 [file 51bef8af53668b8985923363.xlsx]

## Sheet: ACBP_vs_C-2
ID	adduct	Name	VIP	Fold change	p-value	m/z	rt(s)	PPM	HMDB	KEGG	SuperClass	Class	SubClass	rtmax	ACBP.OXA	C.2	P-21-4	AC-14-4	AC-15-4	AC-17-4	C-4-2	AC-12-4	AO-43-4	AC-13-4	C-1-2	P-24-4	AO-45-4	AO-47-4	C-9-2	C-8-2	C-7-2	AO-50-4	AC-20-4	AO-49-4	AO-44-4	P-29-4	O-39-4	AO-46-4	AO-42-4	O-38-4	O-40-4	AC-18-4	P-23-4	P-27-4	O-36-4	AO-48-4	O-34-4	C-3-2	AC-11-4
M333T257	[M+H]+	Butamifos	1.08809	1.66136	0.00417826	333.115	256.856	1.99257		C11022	Benzenoids	Benzene and substituted derivatives	Nitrobenzenes	266.994	10	9	28952	25525.2	52829.1	47746.9	28222.6	32963.6	22520.6	43046.1	7622.93	17798.7	23154	28768.9	13034	17265.6	22572.7	30617.5	34392.3	45634	35995.1	21399.1	27559.3	28610.3	17427.9	30478.3	43374.2	38873.1	85109.1	45485	32368.4	28692.1	16041.8	33611.8	29924.4
M105T37	[M+H-H2O]+	2-methylbenzyl alcohol	1.92328	1.23091	0.0046555	105.069	37.428	2.77997		C07213	Benzenoids	Benzene and substituted derivatives	Benzyl alcohols	52.368	10	10	375254	325646	258353	333867	260253	349945	212701	336716	285787	315546	275223	158314	333701	315460	343242	261940	370718	239899	244322	378171	273394	274638	205975	302441	370415	334087	416044	229755	235796	158074	337877	203844	330349
M402T202	[M+H]+	Myriocin	1.21032	0.601238	0.0130746	402.262	202.217	2.97269		C19914	Lipids and lipid-like molecules	Fatty Acyls	Fatty acids and conjugates	206.33	8	9	13005.4	18419.4	14723.4	28893.8	26554	26077.9	31510	35494.1	55264.1	49309.6	33096.4	39577.8	73674.2	20144.2	49588	28489.8	33653.6	40378.9	31477.2	24158.9	52329.5	27791.6	39727.6	31571.7	18706.8	23689.8	7630.41	33784.1	29813.4	18935.8	70603.8	33576.7	32798.3
M218T443	[M+H]+	Ala-Lys	3.39393	0.193586	0.017687	218.149	443.303	5.86966			Organic acids and derivatives	Carboxylic acids and derivatives	Amino acids, peptides, and analogues	448.586	7	6	331938	20717.2	38025.2	44128.7	25230.9	31088.3	385185	51038.2	412124	21423.6	65788.5	398434	412921	64085.2	50055.5	29239.2	46457.8	55694.7	391575	97388.5	394754	35071.9	24603.5	346255	91578.1	11179.2	20790.4	70345.7	343314	19668.5	342364	334272	24458.7
M198T303	[M+2H]2+	Phe-Thr-Lys	1.12812	0.634963	0.0181585	198.122	303.486	3.72193			Organic acids and derivatives	Carboxylic acids and derivatives	Amino acids, peptides, and analogues	304.904	10	8	7116.88	51902.3	3395.67	67634.9	76641.2	52532.7	44447.6	48487.9	37229.6	58268.7	61238.2	50150.7	82392.1	45073.6	88387.5	48662.1	66522.8	44618.9	41967.1	25033.2	55655.7	25992.6	50464.7	80624.2	26094.5	47962	61091.4	74166	77838.4	58223.7	89386.9	43576.3	44459.6
M246T305_1	[M+H]+	Val-Gln	2.2214	0.673785	0.018662	246.144	304.508	1.52871			Organic acids and derivatives	Carboxylic acids and derivatives	Amino acids, peptides, and analogues	308.934	10	10	29688.6	31100.6	32739.6	106257	60172.3	135596	113320	111295	166501	179869	111450	87977.2	98813.8	183318	152895	91561.6	131677	193425	48508.6	161565	124245	86996	102735	116523	241381	69390.3	42901.2	139806	81476.3	102743	98620.9	117371	84980.2
M296T135	[M+H-H2O]+	Heliotrine	1.39213	1.54768	0.0263317	296.199	135.202	2.5948		C10324				160.934	6	8	48538.9	70205.4	101830	36790.1	55759.9	44211.5	31433.5	73731.2	40673.7	43569.1	12344.9	39885.3	35283.2	5552.88	62152.1	45519.5	44952.7	53944.5	20423.1	38722.6	40258.2	51856.8	24013	29146.3	52413	69170.6	92354.9	42507.7	30353.5	30465	70984.6	46538.3	45524.7
M494T375	[M+Na]+	Puromycin	2.18968	0.489263	0.0315064	494.208	374.579	1.9988		C01610	Nucleosides, nucleotides, and analogues	Purine nucleosides	Purine 3'-deoxyribonucleosides	377.524	10	9	91023.3	64617.8	8504.83	96222.1	8489.69	37126.6	73902.7	55303.5	185269	110524	218369	41335.7	80459.2	60367.7	177039	66313.8	73731.6	40239.2	144494	49399.4	83880.2	104038	56624.4	27429.4	155195	16954.1	238309	100362	78823.1	39927	149443	139790	126886
M344T148	[M+H]+	Putative (3-hydroxyheptadecanoyl)glycine	1.29543	1.28067	0.0369305	344.278	148.17	1.82077			Organic acids and derivatives	Carboxylic acids and derivatives	Amino acids, peptides, and analogues	156.915	10	10	290607	224177	172039	324326	161954	162981	289109	165198	132459	176787	144031	408350	149745	151409	163230	333259	231432	204783	125645	146156	234093	219150	135125	166996	92870.2	126335	130115	225154	162143	200570	92783.5	171193	160226
M116T33	[M+H-C3H5ClS]+	Sulfallate	1.22038	1.60339	0.0473364	116.052	32.519	2.01661		C19096	Organic acids and derivatives	Dithiocarbamic acids and derivatives	Dithiocarbamic acid esters	35.205	10	9	46574.1	94812.6	44574.2	33431.1	30520	91378	32244.1	34844.7	48066.7	27949	50719.7	50552.2	52720.7	53579	31588.7	36081.8	12914.2	48682.6	51314.2	42760	14628.3	31723	27717.8	29923.8	28802.7	58578.3	197467	29246.8	64557.7	13289.3	31576.8	20497.3	45844.4
M183T38	[M+H-C7H6F3NO]+	1-trifluoromethoxyphenyl-3-(1-propionylpiperidin-4-yl)urea	1.72706	1.61415	0.0496689	183.137	37.8795	4.20667			Benzenoids	Benzene and substituted derivatives	N-phenylureas	39.19	8	10	46911.9	24732.4	177928	162936	39885	131868	62369.2	173325	27909.6	133948	151201	98297.5	87977.9	97272.9	194123	153702	140183	172274	144620	143378	121814	126430	162493	128304	75009.3	125675	100408	108300	93488.4	91754.9	179002	94330	110559
M348T162	[M+NH4]+	(z)-9,12,13-trihydroxyoctadec-15-enoic acid	3.40039	1.3915	0.0524179	348.273	161.624	0.442851			Lipids and lipid-like molecules	Fatty Acyls	Fatty acids and conjugates	171.287	10	10	336524	210448	603766	574628	438162	570153	273159	800687	121533	428894	477478	351097	282048	366719	512389	481673	475358	503271	488576	496627	542591	352781	535189	489179	459567	357725	583243	459871	356764	352850	601929	388023	576977
M410T159_2	[M+NH4]+	Ursodeoxycholic acid	11.507	0.524092	0.0638988	410.325	159.205	0.80431	HMDB0000946	C07880	Lipids and lipid-like molecules	Steroids and steroid derivatives	Bile acids, alcohols and derivatives	167.996	10	10	301210	4.64102e+06	216459	1.15414e+06	4.05227e+06	1.03869e+06	2.36033e+06	2.33406e+06	4.137e+06	3.82299e+06	2.30844e+06	7.2786e+06	1.01639e+07	1.53343e+06	1.80544e+06	2.02517e+06	1.87162e+06	2.15105e+06	2.90636e+06	2.11308e+06	3.99203e+06	1.76565e+06	1.50602e+06	2.91272e+06	1.4616e+06	3.3984e+06	424603	1.77062e+06	2.99579e+06	2.57514e+06	7.01038e+06	4.03501e+06	1.46774e+06
M160T229_2	[M+H]+	Valine betaine	3.7739	1.53881	0.0753398	160.132	228.733	2.62359			Organic acids and derivatives	Carboxylic acids and derivatives	Amino acids, peptides, and analogues	237.717	10	10	1.00542e+06	182899	825167	1.08734e+06	251751	757995	593285	1.01355e+06	121071	553034	760438	365459	222174	619493	720795	541927	1.03232e+06	719750	358654	632737	627707	329121	697601	653139	741647	214396	435960	1.11151e+06	459535	725430	431332	508484	748192
M357T159	[M+H-C2H7O3N]+	Glycodeoxycholic acid	18.3876	0.446639	0.0767091	357.278	158.831	1.25739	HMDB0000631	C05464	Lipids and lipid-like molecules	Steroids and steroid derivatives	Bile acids, alcohols and derivatives	168.194	10	10	428520	1.11124e+07	380078	2.04702e+06	9.08135e+06	1.85503e+06	4.47741e+06	4.73097e+06	9.24589e+06	8.34947e+06	4.32476e+06	1.69289e+07	2.95944e+07	3.02747e+06	3.61754e+06	4.28626e+06	3.51866e+06	3.94488e+06	6.82746e+06	4.01977e+06	8.15886e+06	3.3859e+06	2.43168e+06	5.75811e+06	2.7196e+06	7.10469e+06	770042	3.19879e+06	6.72262e+06	6.00806e+06	1.72372e+07	9.18364e+06	2.64351e+06
M312T417	[M+H]+	Arg-his	1.00009	0.745572	0.0773138	312.19	416.988	1.9964			Organic acids and derivatives	Carboxylic acids and derivatives	Amino acids, peptides, and analogues	440.216	10	10	51015	41250.5	35484.5	44863.6	40051.4	51520.9	36932.7	53904.7	104871	58302.3	68220.9	45835	52065.5	45912.5	73893.2	41027.4	55106.1	46451.8	58167.4	47869.3	50289.5	41425.8	42372.4	41594.6	35845.2	32644.4	43159.6	34139.2	41944.1	41663.3	76187.7	48673.7	39224
M172T39	[M+H]+	Gabapentin	1.1863	1.56047	0.0788871	172.132	39.1985	0.219777	HMDB0005015	C07018	Organic acids and derivatives	Carboxylic acids and derivatives	Amino acids, peptides, and analogues	52.401	10	10	20985.8	18384.6	53726.5	67349.7	22752.7	76335.9	28075.2	164319	13851.8	75781.2	55635.3	33008.5	60822.2	39980.4	78997.9	62352.8	70708.2	95374.7	48117.5	53241.2	26943.3	42328	106871	190892	53446.4	53295.1	90957.1	42593.7	44541.2	70917.9	138973	41725.8	100566
M378T192	[M+H-H2O]+	15(s)-15-methylprostaglandin f2.alpha. ethylamide	1.16851	0.711537	0.0829162	378.309	191.685	4.46843						217.302	10	9	21937.4	3628.49	21305.8	63612	86374.9	62440.4	70856.4	71298	61852.9	85070.9	102549	82891.6	98104.5	49436.4	121408	76504.2	80638.9	46138	71804.1	39207.7	98886.8	63255.5	74661.1	69337.8	19369.5	66718.8	75488.4	48502.1	59767.8	58886.9	84012.8	52716.2	58643.2
M437T399	[M+Na]+	Podofilox	3.29475	1.81095	0.0862556	437.125	399.365	1.14307	HMDB0015310	C08411	Lignans, neolignans and related compounds	Lignan lactones	Podophyllotoxins	401.265	10	9	56649.4	716671	134974	599866	538206	958769	345686	940371	18989.7	521864	409647	396648	192251	193836	325900	1.29527e+06	243305	595781	1.62827e+06	282224	1.1713e+06	636301	677694	306674	216704	153000	64576.6	1.01464e+06	227624	962391	214480	182050	792465
M207T32	[M+H]+	Isoeugenyl acetate	1.11911	1.25303	0.0886527	207.101	31.7625	3.18539	HMDB0032348					62.109	10	10	122622	64143.6	94500.1	174919	93137.5	162077	82038.7	188871	80643.4	133168	145669	81180.6	63471.9	137470	136270	160546	170740	201425	135204	148127	120924	109273	170332	141092	109227	116606	150483	145118	127763	136208	154140	128236	169069
M440T266	[M+H]+	His-Gln-Arg	1.09786	0.727288	0.0927001	440.252	266.178	1.14589			Organic acids and derivatives	Carboxylic acids and derivatives	Amino acids, peptides, and analogues	268.249	10	9	10063.2	14849.2	12621.1	29762	10274.3	41035.6	36135.8	44273.5	54270.6	47026.2	65702.1	38676.8	66431.6	32642.4	45671.7	45318.8	50553.3	42421.4	48752.7	32011	52311	25319.8	41452.9	47316.9	19316.7	32055.3	10492.5	45261.8	43922.8	50752.1	53875.5	34411.8	28776.9
M375T159	[M-H2O+H]+	Chenodeoxycholic acid	4.87243	0.522397	0.0933554	375.288	159.072	1.91453	HMDB0000518	C02528	Lipids and lipid-like molecules	Steroids and steroid derivatives	Bile acids, alcohols and derivatives	167.996	10	10	62285.9	890373	48307.3	221782	713033	185071	424942	443067	709193	730938	428044	1.44519e+06	2.22358e+06	288562	340587	403382	351443	403060	570944	395779	759240	334529	269019	538646	280696	758546	95174.2	316197	577782	497121	1.45015e+06	764395	272980
M497T413	[2M+H]+	Dapsone	1.5336	1.60569	0.0963877	497.146	412.817	1.55186	HMDB0014395	C07666	Benzenoids	Benzene and substituted derivatives	Benzenesulfonyl compounds	422.441	8	9	149641	91433.2	94563.9	329998	50736.4	151742	116413	177060	36076.2	137141	117585	122883	59161.6	58016.5	100739	67463.9	99702.6	121243	94133.4	113196	172875	70000.5	154816	141631	69466.4	27163.7	192359	240164	52657.6	108321	42191.1	67377.1	124326
M335T354	[M+Na]+	Nivalenol	2.79105	2.78577	0.0964952	335.094	354.431	0.889141		C06080	Lipids and lipid-like molecules	Prenol lipids	Sesquiterpenoids	356.741	3	8	127437	27526.2	94523.7	824404	83084.2	536592	71389.4	443369	19177.3	137128	57778.9	187885	7900.14	59188.8	160010	134154	77878.9	204568	83687.8	165840	201708	41679.1	236340	102012	77365.6	14640	54956.2	533872	56409.1	153299	35573.6	42119.1	242980
M165T34_1	[M+H-C19H38]+	(+)-.alpha.-tocopherol	2.85908	0.81198	0.0984687	165.09	33.5655	3.33824	HMDB0001893	C02477	Lipids and lipid-like molecules	Prenol lipids	Quinone and hydroquinone lipids	34.707	10	10	252297	292753	164196	369732	261147	282404	494873	373140	537043	430290	405247	615116	547328	296171	413366	420426	375025	374214	455155	258534	427768	341701	386076	353786	204180	435851	170378	326603	429813	441455	542383	348040	310961
M328T246	[M+H]+	Diprotin b	1.20048	0.640318	0.0992266	328.222	245.652	2.4846			Organic acids and derivatives	Carboxylic acids and derivatives	Amino acids, peptides, and analogues	248.645	10	9	9675.98	11550.9	22843.1	37633.7	26513.6	52451.3	18982.7	31624.6	30620.2	30725.2	23776.3	17598.6	22401.1	99263.2	34948.3	25133.4	56039.3	77713.7	23265.9	57527.6	53911.1	23707.3	25032.3	17834.7	193068	18114.8	19301.1	32309	17229.9	60964.5	21596.1	27420.5	23488.1
M274T42	[M+H]+	Fenpropidin	10.1418	1.22648	0.0997089	274.274	41.901	1.45511		C18726	Benzenoids	Benzene and substituted derivatives	Phenylpropanes	43.301	10	7	9.40409e+06	5.50761e+06	6.94849e+06	7.70425e+06	6.43315e+06	9.57559e+06	5.96803e+06	8.83708e+06	3.67279e+06	1.08626e+07	6.71985e+06	6.11668e+06	6.79138e+06	9.52023e+06	7.40336e+06	7.69372e+06	6.63442e+06	9.44433e+06	5.76319e+06	9.18157e+06	1.0279e+07	6.40426e+06	7.39046e+06	1.03288e+07	1.19659e+07	7.51183e+06	1.11537e+07	7.72059e+06	7.12797e+06	5.58919e+06	8.34556e+06	5.63577e+06	7.20451e+06
M567T343	[M+Na]+	10-deacetylbaccatin iii	0.220555	0.909683	0.574204	567.216	343.422	1.01632		C11700	Lipids and lipid-like molecules	Prenol lipids	Diterpenoids	345.156	10	9	1779.92	3341.69	3453.42	8189.41	6441.72	7211.18	4514.4	6394.98	3600.28	10319.4	8423.8	5140.82	2939.08	5592.46	6209.38	5119.1	8275.08	9899.34	8576.33	9348.13	8529.31	11013.2	4184.19	5350.41	9072.52	5769.93	2682.21	6883.65	4877.48	6426.12	7498.66	9319.21	5278.34
M263T128	[M+H-H2O]+	10e,12z-octadecadienoic acid	0.241532	1.21546	0.27174	263.247	128.012	2.73826			Lipids and lipid-like molecules	Fatty Acyls	Lineolic acids and derivatives	134.545	9	4	10398.6	9322.15	9826.24	20643.1	9128.23	17950.7	13373.9	21487.4	8217.94	17294.5	17303.9	7099.78	12308.3	11921.5	18748.7	16094.6	21001.3	8784.43	15989.1	7185.4	13853.4	12971.7	654.109	14136.7	6606.16	11972.1	10365.4	10305.9	12667.3	9141.51	23777.4	7038.16	12138.9
M350T245	[M+Na]+	10-nitrooleic acid	0.358732	1.02715	0.878799	350.242	245.113	6.13926	HMDB0062737		Lipids and lipid-like molecules	Fatty Acyls	Fatty acids and conjugates	259.202	8	9	28612.9	40555.8	31222.1	14783.3	34402.1	14578.9	23709.3	22455.5	21500.6	28261	21360.5	37953	20358.1	20354	23375.6	57336.4	16716.6	14005.4	39301.8	29402.8	29878.2	18979.6	24625.3	20145.4	5302.76	13392.1	25008.7	5848.53	14055.5	14427	15567.2	8958.39	11446
M519T254	[M+Na]+	1-(10z-heptadecenoyl)-sn-glycero-3-phospho-(1'-rac-glycerol)	0.233771	1.03811	0.781062	519.257	254.267	0.0180254						256.411	9	8	7134.03	4171.97	14364.2	16924.4	8354.59	15216.8	13258.8	15737.8	10401.2	11624.9	13721.8	9218.12	8366.12	9557.89	18984.7	15036.7	13750.5	12604.9	11435.3	13703.1	13838	14834.1	12195	14952.1	15083.9	9227.47	10278.1	12847.1	11429.1	9762.97	14140.3	12933.4	11221.4
M409T216	[M+H]+	1-[1-(1-methylcyclooctyl)-4-piperidinyl]-2-[(3r)-3-piperidinyl]-1h-benzimidazole	0.287701	1.02537	0.885604	409.34	215.909	3.39556						230.089	9	7	24144.6	26981.3	21497.4	24135	26876.3	22168.5	15412.9	34307.4	14349.3	19635.2	18450.8	34172.7	40967.9	12907.7	18740.8	11457.1	13677.6	14854.2	18563.2	17198.5	15301.8	15075.7	11936	28975.2	17850.7	24609.6	17620.7	21407.5	24278.6	21261.3	42799.7	33997.2	11663.6
M227T33	[M+H-H2O]+	1,11-undecanedicarboxylic acid	1.60013	1.17864	0.577573	227.163	33.1705	5.11162	HMDB0002327		Lipids and lipid-like molecules	Fatty Acyls	Fatty acids and conjugates	39.43	10	10	75575.6	52060.2	46249.1	256409	42909	486267	237289	431070	51189.6	255908	424909	205863	163140	187580	365341	427248	417510	282459	285464	181461	427694	322371	661730	406335	99964.8	230641	95082.1	405250	487430	488809	301123	220832	367593
M194T334	[M+H]+	1-(1',3'-benzodioxol-5'-yl)-2-butanamine	0.244573	1.09094	0.542511	194.117	334.183	4.75317						351.071	10	10	17733.2	59998.7	23933	45642.8	29415.7	56927.2	58088.6	45707.7	52247.4	46746.4	59304.2	47307.2	60628.2	41230.7	31078	48226.2	63213.8	62335.2	59299.3	32171	61235.1	63742	64793.4	57290.7	38011.5	61402.8	45874	48723.5	52771.9	54549.9	45914.8	54750.5	59270.5
M583T343	[M+H+2i]+	[1,1'-biphenyl]-2-carboxylic acid, 4'-[[5-[[[(1s)-1-(4-bromophenyl)ethyl]amino]carbonyl]-2,3-dimethyl-1h-indol-1-yl]methyl]-	0.389617	0.47382	0.172995	583.137	343.31	2.18611			Organoheterocyclic compounds	Indoles and derivatives	Indolecarboxylic acids and derivatives	345.874	6	9	744.674	4203.58	1711.53	4473.63	3576.98	3193.85	1769.67	3536.45	4246.89	3250.53	3428.23	3084.48	1928.24	2214.75	2282.75	5230.35	6476.94	3150.54	6823.75	2737.01	3199.93	3977.07	2114.61	890.787	2617.58	1528.38	6011.67	4276.61	2038.42	3331.88	2546.16	22852.6	2611.24
M363T224	[M+Na]+	11-deoxyprostaglandin f1.alpha.	0.260105	0.989792	0.924436	363.263	223.739	2.63575			Lipids and lipid-like molecules	Fatty Acyls	Eicosanoids	228.238	10	10	23810.7	54480.2	43914.4	42268.5	57850	40648.8	35017.2	41395.8	25085.6	40527.6	39261.7	52451.5	66289	37121.2	41481.9	37194.2	45380.4	40441.7	33322.7	51470.4	66100.9	36148.9	35418.5	39234.7	37983.7	34352.3	45870.2	28986.3	30184.2	34993.9	42193.5	39357.4	27244.2
M191T169	[M+H]+	1,1-dimethyl-4-phenylpiperazinium	1.47439	0.985961	0.966331	191.153	169.478	3.57787			Organoheterocyclic compounds	Diazinanes	Piperazines	178.662	10	10	34615.5	14520.9	17846.2	156830	14655.2	344296	300161	318830	80604.7	279977	401204	140152	231472	96913.3	496549	316806	398101	191339	276189	88959.5	270612	150035	321483	369695	47150.9	223346	13646.1	296547	266891	239767	450804	156752	234954
M341T39	[M+H]+	11-hexadecenoic acid, 16-[[(ethylamino)carbonyl]amino]-, (11z)-	0.825717	0.73102	0.395087	341.267	39.162	3.78389			Lipids and lipid-like molecules	Fatty Acyls	Fatty acids and conjugates	47.787	8	7	30615.1	28285.6	72954.6	65645.3	38708.6	124649	55654.1	36093	18501.5	32535	81060.7	67353.4	46605.9	242721	231465	119840	69631.8	152205	31413.2	34488.1	34727.6	80003.9	43429.5	73124.8	41311.6	69020	59722.5	83333.1	106272	40474	134299	65673.2	70433.1
M480T188_2	[M+H]+	1-(1z-hexadecenyl)-sn-glycero-3-phosphocholine	2.3282	0.865951	0.468222	480.343	187.852	0.755827	HMDB0010407		Lipids and lipid-like molecules	Glycerophospholipids	Glycerophosphocholines	202.073	10	10	128225	593174	120649	587321	499385	680064	2.2009e+06	685582	810617	1.07592e+06	1.19282e+06	1.106e+06	677362	658526	1.11375e+06	398105	567503	744908	1.76085e+06	681906	630950	1.14658e+06	387858	511622	494097	697186	168839	486521	313442	467643	581195	740357	690552
M819T141	[M+H]+	1-(1z-octadecenyl)-2-(4z,7z,10z,13z,16z,19z-docosahexaenoyl)-sn-glycero-3-phosphocholine	0.396693	0.870347	0.539871	818.601	141.403	1.16284	HMDB0011262		Lipids and lipid-like molecules	Glycerophospholipids	Glycerophosphocholines	149.304	7	8	13913.3	18674.4	13874.6	54046.9	19814.2	30879.9	70733.5	26091.5	16678	31250.2	20742.4	28265.5	27686.9	27164.6	55084.6	15378.9	21917	30264.6	35091.1	40213.5	37719	36233.8	12752.3	20554.3	36654.5	26947.4	16635.3	22594	12853.6	21122.3	28042.6	30199.3	16346.7
M773T146	[M+H]+	1-(1z-octadecenyl)-2-(9z-octadecenoyl)-sn-glycero-3-phosphocholine	0.229661	0.893009	0.57688	772.614	145.826	3.65106	HMDB0011243		Lipids and lipid-like molecules	Glycerophospholipids	Glycerophosphocholines	153.217	6	5	34655.8	34930.8	31014.3	9899.67	33653.3	22747.3	48676.6	27464.8	10280.4	32509.4	15099.7	33440.1	34569.4	14434.6	16446.4	31663.2	34203.4	37794.5	35089.8	22922.8	37518.2	31005.5	8841.69	37658.8	67194	13778.8	32540	10906.5	77665.7	33113.1	19841.9	30940.1	29049.1
M508T197_2	[M+H]+	1-(1z-octadecenyl)-sn-glycero-3-phosphocholine	1.71062	1.01326	0.964326	508.374	197.242	1.8622	HMDB0013122		Lipids and lipid-like molecules	Glycerophospholipids	Glycerophosphocholines	202.632	10	10	87450.8	176935	111701	472814	226349	666786	355726	338583	147355	377080	638008	327997	210374	464523	849198	309391	453926	371969	730598	611935	314439	555985	220708	228947	298543	141732	100969	334330	229095	346649	246715	325053	297134
M363T32	[M+H-3H2O]+	1,24-dihydroxyvitamin d3	0.796547	1.19241	0.527627	363.288	32.38	0.0483387		C12919	Lipids and lipid-like molecules	Steroids and steroid derivatives	Vitamin D and derivatives	51.618	8	6	99964.7	74287.7	114943	21259.6	94773.4	34787.2	50231.5	55949.9	22317.9	26442.8	86926.6	22174.2	87628.5	46114.1	41039.7	65020.7	33217.7	10308.5	18763.2	30628.1	63481.1	10046	62906	49031.6	26213.9	28815.1	15365.7	30175.9	42162	36428.5	25068.3	60595	26385.6
M510T216	[M+H]+	1,2-bis(o-octanoyl)-sn-glycerylphophorylcholine	0.384181	0.954558	0.834791	510.318	215.594	1.23573			Lipids and lipid-like molecules	Glycerophospholipids	Glycerophosphocholines	217.768	4	5	12813.2	13242.8	12210.5	13793.5	15209.6	53317.8	19974.4	12773.6	16476.5	24046.5	26199.7	20675.7	16736.4	18791.1	28447.6	26462.3	30898.6	14943.5	20328.7	22012.1	28782.9	17176.1	35999.3	13174.3	16992.9	16825.5	5287	39634.2	21629.9	22773.9	25229.4	25344.9	20016
M72T303_2	[M+H-NH3]+	1,2-diamino-2-methylpropane	2.43134	1.05661	0.86208	72.0803	302.801	3.12001			Organic nitrogen compounds	Organonitrogen compounds	Amines	309.652	10	10	104472	625967	1.50851e+06	453565	1.57571e+06	1.08449e+06	146059	703450	276313	585409	289194	244448	74022.8	706008	378892	252876	346528	852678	548747	835405	265889	712581	242676	74949.4	1.03353e+06	129605	423532	986143	83662.7	683052	186446	797220	246754
M329T34	[M+H]+	1,2-dihydroxyheptadec-16-en-4-yl acetate	0.68056	0.990086	0.949683	329.268	34.238	3.47661	HMDB0031045		Lipids and lipid-like molecules	Fatty Acyls	Fatty alcohols	47.934	10	10	65473.6	76645.4	168291	136652	148153	347834	262516	171588	210656	177934	309831	155525	178281	145465	260173	335283	215645	116041	92162.1	116140	319444	415962	455607	220954	115520	243029	82472.1	283265	342140	335248	182634	226175	218310
M479T188_2	[M+Na]+	1,2-dilauroyl-sn-glycerol	0.341783	0.840035	0.468459	479.357	188.352	2.14284	HMDB0093027		Lipids and lipid-like molecules	Glycerolipids	Diradylglycerols	194.842	5	6	5185.11	7390.17	4331.91	14132.7	5451.41	13610.6	14170	10909.3	4281.34	19522	19808.1	12453.7	9712.96	6450.47	18652.9	11794.2	12162.9	5605.36	10533.4	6700.1	15148.2	7605.38	13068.5	17984.6	6358.49	7406.61	5381.59	12442.3	9485.84	7010.97	21818.9	13353.6	6567.94
M635T32	[M+NH4]+	1,2-dilinoleoylglycerol	1.97309	0.973907	0.920784	634.536	31.602	2.2188			Lipids and lipid-like molecules	Fatty Acyls	Lineolic acids and derivatives	33.031	10	10	1.34203e+06	232178	559784	1.11467e+06	481538	381050	524003	374355	433634	736104	546471	661590	208400	1.0864e+06	310517	287374	620080	896570	1.06901e+06	614647	249371	302101	280750	763421	2.49666e+06	280964	2.15542e+06	1.04358e+06	267285	548764	458075	1.02987e+06	999398
M741T149	[M+H]+	1,2-dilinoleoyl-sn-glycero-3-phosphoethanolamine	0.59977	1.04466	0.823208	740.519	149.313	0.591757	HMDB0009093		Lipids and lipid-like molecules	Glycerophospholipids	Glycerophosphoethanolamines	161.537	10	9	37479.5	23555.3	55801.6	98968.1	44198.1	45017.5	41273.6	43537.3	18598.2	65230.2	50133.4	38883.4	53891.8	70032.7	30329.1	37924.7	80718.4	85111.7	44576	37743.9	59204	42112.4	22302.9	63624	204407	42000.7	74142.9	80131.1	46578.3	60942.1	31235.1	60853.5	66958.7
M97T120	[M+H]+	1,2-dimethylimidazole	2.00322	1.62645	0.516608	97.0751	120.32	7.16495			Organoheterocyclic compounds	Azoles	Imidazoles	128.418	9	9	167400	62330.1	465879	101174	247221	7950.92	326001	10119.9	4131.68	93933.2	27003.1	42936.9	8619.88	12758.7	62308.7	12649.2	11049.3	10784.1	9155.19	14914.4	10525	29273.5	12712.2	7578.04	16473.1	11645.7	183037	15282.7	11534.9	12093.8	8768.29	15512.7	9169.24
M731T150	[M+H]+	1,2-dipalmitoleoyl-sn-glycero-3-phosphocholine	0.338469	1.16124	0.46214	730.535	150.395	1.81147	HMDB0008002		Lipids and lipid-like molecules	Glycerophospholipids	Glycerophosphocholines	163.969	10	9	23886.6	27968.2	25302.8	80318.5	24192.3	29596.1	28858.1	28372.7	12122	33414.3	30935	50107.4	36028.1	27637	22050.3	34578.5	42295.6	46671.4	33042.8	30151.6	42838.2	32951.7	14548.4	49214.7	95302.1	26902.9	59179.8	31181.1	19648.6	26603.5	32512.2	31129	31748.9
M664T155	[M+H]+	1,2-dipentadecanoyl-sn-glycero-3-phosphoethanolamine	0.767924	0.979534	0.945761	664.488	154.66	1.5364	HMDB0008889		Lipids and lipid-like molecules	Glycerophospholipids	Glycerophosphoethanolamines	163.036	10	9	30916.9	28384.5	14879.8	170499	25624.2	104838	130977	98337	12439.1	64369.4	111338	45078	193796	88114.3	50685.4	89516.2	144725	84342.4	118006	44227	170526	35315.1	36292.8	130768	98815	133452	18499.9	139860	247442	165608	82936.2	103565	46229.9
M627T405	[M+H-H2O]+	1(2h)-pyrimidineacetamide, n-[(1s,3s,4s)-4-[[2-(2,6-dimethylphenoxy)acetyl]amino]-3-hydroxy-5-phenyl-1-(phenylmethyl)pentyl]tetrahydro-4-hydroxy-.alpha.-(1-methylethyl)-2-oxo-, (.alpha.s)-	0.35195	0.854547	0.791811	627.354	404.777	0.968624			Organic acids and derivatives	Carboxylic acids and derivatives	Amino acids, peptides, and analogues	418.758	6	7	2695.5	13863.6	42633.7	5419.65	53741.4	4990.88	3480.66	9381.25	4943.88	5075.06	5210.59	3180.01	3029.95	11911.9	4354.28	4094.63	2263.31	8498.25	6566.53	34899.3	1078.38	6777.03	3298.93	2215.98	69130.4	2397.68	22122	5214.19	3007.24	4092	3793.71	8595.17	2909.48
M643T410	[M+H]+	1(2h)-pyrimidineacetamide, n-[(1s,3s,4s)-4-[[2-(2,6-dimethylphenoxy)acetyl]amino]-3-hydroxy-5-phenyl-1-(phenylmethyl)pentyl]tetrahydro-.alpha.-(1-methylethyl)-2,4-dioxo-, (.alpha.s)-	0.221688	1.02783	0.888103	643.331	409.978	1.04628			Organic acids and derivatives	Carboxylic acids and derivatives	Amino acids, peptides, and analogues	419.146	10	9	52997.4	49393.6	28694.7	40736.7	45330.8	49347.7	21008.4	88350.4	18544.2	47064.7	63966.3	48834.3	38526.5	32380.1	73444.8	25246.3	46923.6	56651.5	33515.1	37759.2	37152.9	37038.3	32945.7	39758.3	59411.7	42795.6	41211.1	29281.3	26170.6	40033.4	70953.7	79303.7	47645.3
M391T119	[M+H]+	12-ketodeoxycholic acid	17.0776	0.704682	0.10926	391.283	118.828	1.68092	HMDB0000328		Lipids and lipid-like molecules	Steroids and steroid derivatives	Bile acids, alcohols and derivatives	132.029	10	10	6.52124e+06	1.97216e+07	7.47153e+06	1.19477e+07	2.55779e+07	1.10979e+07	1.06002e+07	1.14742e+07	2.43497e+07	5.32068e+06	6.94015e+06	2.3363e+07	1.73827e+07	7.93678e+06	1.73553e+07	7.94089e+06	1.16352e+07	1.18346e+07	8.73626e+06	9.08088e+06	1.86072e+07	8.87789e+06	9.93922e+06	1.13126e+07	7.51347e+06	1.19641e+07	8.52776e+06	9.2712e+06	5.78098e+06	9.44429e+06	7.7036e+06	1.53308e+07	8.39271e+06
M265T150	[M+H-H2O]+	12(s)-hydroxy-16-heptadecynoic acid	0.0116112	1.02233	0.875585	265.227	150.275	9.40772			Lipids and lipid-like molecules	Fatty Acyls	Fatty acids and conjugates	160.42	10	10	5895.6	6187.51	8654.83	8117.99	10514.1	9715.92	10379.5	7794.28	6068.96	10983.5	9355.46	9356.41	7670.79	7963.86	8446.31	9866.04	7539.43	6306.3	8110.18	10056.7	8765.36	8015.45	2688.82	12929.4	11887.4	11684.6	9377.47	12878.3	10966	8071.58	6966.57	14831.7	5630.81
M343T257	[M+Na]+	12s-hydroxy-5z,8z,10e,14z-eicosatetraenoic acid	0.0840623	0.97744	0.852875	343.232	256.856	2.74973		C14777	Lipids and lipid-like molecules	Fatty Acyls	Eicosanoids	259.44	9	6	10021.8	12442.7	13417.6	13112.2	15749.4	11038.6	8877.63	15619.2	14056.1	10287.4	12831.4	11058.6	11919.9	16698.1	20212.9	7036.86	9296.37	15140.7	11108.6	13471.7	15675.3	13873.1	10086.7	9587.9	13903.7	19774.8	14502.2	8521.76	12206.1	16292.7	11100.8	14571.7	13477.5
M499T35_1	[M+H-H2O]+	13,14-epoxyfluprostenol isopropyl ester	1.10181	1.24614	0.49524	499.224	35.25	4.81062						37.86	9	7	53081.9	144180	54348.7	30574	86263.2	17233.4	8891.8	20228	32966.9	11040.7	10430.1	49946.2	39879.3	37693.3	13836.9	18825	16452.8	14469.4	20396.3	48771	15485.3	70535.4	16578.9	20149.8	87034.8	64706.3	92790.7	13823	21443.5	34967.8	33992.1	72357.1	24462.9
M647T416	[M+Na]+	1,3,5(10)-estratrien-3,17.beta.-diol diglucosiduronate	0.150276	1.31508	0.220417	647.237	415.967	4.40233			Lipids and lipid-like molecules	Steroids and steroid derivatives	Steroidal glycosides	436.269	8	6	2943.05	1252.23	3181.39	8951.53	1681.17	5704.12	7479.77	7482.43	4011.15	5253.79	4914.75	2017.07	2429.33	3401.19	4497.7	2881.55	6973.94	2574.44	3530.66	2821.95	3351.22	2256.63	2042.39	3705.43	2354.2	2546.14	3049.91	4668.17	3196.13	3324.46	4006.65	4161.47	3336.27
M483T340	[M+Na]+	1,3,5-o-methylidyne-2,4,6-tri-o-benzyl-myo-inositol	0.171645	0.894603	0.395365	483.195	340.238	2.06541			Benzenoids	Benzene and substituted derivatives	Benzylethers	343.779	8	6	3635.69	3101.47	6915.19	5602.89	8410.75	4331.57	4568.33	8936.4	9364.64	12368.5	9355.41	7945.21	8234.64	4431.43	7846.7	7962.99	6357.46	13793.5	4816.89	6844.55	14359.6	2413.4	4571.61	11919.7	4133.24	8867.99	7448.7	9539.32	9317.37	7374.93	10424.5	5281.91	4337.77
M209T182	[M+H]+	1-(3-fluorobenzyl)-4-piperidinamine	0.55848	0.938496	0.745159	209.164	182.171	3.09564			Organoheterocyclic compounds	Piperidines	Benzylpiperidines	198.695	10	7	4700.05	9260.26	11906.8	33029	14780.8	42547.4	36775.1	36998.2	25480	47946.9	50571.8	36838.3	36394.2	43049	37322.3	38858.8	49450.7	43286.8	40906.1	9713.05	44904	24700.1	44413.3	46568.7	10886.8	33119.4	11294.7	38951.9	36215.5	29228.7	58995.4	30982.8	29549.4
M295T53	[M+H]+	13-keto-9z,11e-octadecadienoic acid	8.76667	1.28773	0.164543	295.226	53.186	0.00164222	HMDB0004668		Lipids and lipid-like molecules	Fatty Acyls	Lineolic acids and derivatives	54.037	10	10	2.22219e+06	1.6094e+06	5.65577e+06	6.99652e+06	3.80578e+06	7.65997e+06	4.84679e+06	1.02003e+07	1.94849e+06	7.97634e+06	9.87135e+06	5.07283e+06	5.37417e+06	5.36746e+06	7.85549e+06	6.4112e+06	9.18865e+06	8.38502e+06	9.1381e+06	6.01423e+06	5.90093e+06	6.05637e+06	9.85942e+06	7.05232e+06	4.03756e+06	5.35166e+06	5.50426e+06	5.53731e+06	4.71072e+06	5.4643e+06	1.02286e+07	5.72151e+06	7.5093e+06
M134T63	[M+H-CH2O2]+	1-(3-pyridyl)-1-butanone-4-carboxylic acid	0.574919	1.02485	0.947557	134.08	62.729	1.25379	HMDB0000992	C19569	Organic acids and derivatives	Keto acids and derivatives	Gamma-keto acids and derivatives	85.227	10	10	14099.4	15657	31316.3	23811.1	15941.6	71969.5	24727.2	53774.7	18411.8	25997.8	93590.3	22943.8	17195.2	63890.1	75457.1	33442.1	51377.7	36360.4	39185.6	56816.3	33568.4	65044.2	26267.2	30521.7	48071.9	12719.3	9550.81	65261.6	28083.8	35880.4	46495.5	54896.7	37762.9
M604T191	[M+H]+	14-benzoylaconine	0.128311	0.720764	0.464175	604.308	191.347	1.94194			Lipids and lipid-like molecules	Prenol lipids	Diterpenoids	203.991	8	9	7417.15	32312.1	18504.5	23522.2	103812	20902.6	5977.78	10573.2	11650.3	30478.1	23367.8	11086.8	7105.21	24362.9	7366.16	6772.3	4705.08	12412.8	18724.8	24711.9	20649.1	28914.9	20880.8	32745.4	26727.1	15533.8	18149.9	26805.2	15440.6	13724.9	7687.85	44372.4	25481.7
M516T373	[M-H+2Na]+	1-[(4-chlorophenyl)methyl]-3-[(1,1-dimethylethyl)thio]-.alpha.,.alpha.- dimethyl-5-(1-methylethyl)-1h-indole-2-propanoic acid	0.0793206	1.00637	0.964323	516.191	372.855	2.81421			Organoheterocyclic compounds	Indoles and derivatives	N-alkylindoles	380.915	5	8	8942.02	6098.11	6566.97	9738.23	3565.83	7191.3	4315.02	8481.85	8957.39	9705.96	8669.95	5272.01	7377.78	4017.65	9649.75	6937.5	3594.12	7129.66	6531.91	6940.49	8669.22	7158.36	5406.63	4355.64	11171.4	4037.08	11749.6	8424.7	6492.33	3765.87	7416.4	8521.46	6331.21
M152T570	[M+H]+	1,4-cyclohexadiene-1-ethanamine, n,.alpha.-dimethyl-	1.56215	1.12629	0.826233	152.127	569.555	2.44822			Organic nitrogen compounds	Organonitrogen compounds	Amines	605.595	10	10	323678	22429.1	504356	32869.8	516241	110760	4694.69	20628.2	4818.57	238062	270250	32850.5	3423.53	34144.1	29225.8	58043.4	6536.73	15637.8	63919.2	136156	60455.6	97847.7	4597.72	29654.5	350102	209157	215418	295508	68627.2	226537	33141	171634	138662
M217T394	[M+H]+	1-(4-piperidinyl)-1,3-dihydro-2h-indol-2-one	0.203867	0.906581	0.72587	217.152	393.598	8.49468			Organoheterocyclic compounds	Indoles and derivatives	N-alkylindoles	400.549	7	10	35059.6	24287.9	43134	18741.8	44410.8	23176.3	1550.84	25270.6	15709.5	24036.7	34923	23905.4	11061.2	26322	38965.4	4821	8408.41	20279.3	16025.6	24394.4	4958.23	15768.2	18147	1708.64	21425.2	9228.65	13727.7	12401.8	6515.63	14699.1	24584.5	31536	4971.34
M284T131_2	[M+K]+	15-deoxy-goyazensolide	0.60168	0.844022	0.549036	284.33	130.654	0.017522			Organoheterocyclic compounds	Lactones	Gamma butyrolactones	143.565	10	10	29548.3	39684.5	23131.3	40184	25603.1	75887.5	36617.6	44462.9	58484.2	67552.7	75476.4	43819.1	177709	59199.2	72236.5	38350	47354.6	46784.4	66139.1	49826	37669.8	43340.7	43775.9	57678.2	52583.8	53518.5	91154.1	34789.8	42809.6	42903	48438.9	25223.6	41270.3
M125T233	[M+H]+	1,5-diazabicyclo[4.3.0]-non-5-ene	0.716452	0.948178	0.65273	125.106	232.822	1.63764						234.612	10	10	95473.8	37229.4	77524.9	98224.2	64396.4	104562	86573.8	102306	95843.9	102635	113991	82585.7	65802.5	109543	127159	88618.2	109096	112830	68185.2	98685.3	92724.9	63701.7	103027	80220	84329.3	55751.5	69741.2	87894.9	69887.7	81952.8	91666.8	73645.6	79499.2
M375T505	[M+Na]+	15-ketoprostaglandin f2.alpha.	0.257271	0.888179	0.466223	375.222	505.215	1.61989	HMDB0004240		Lipids and lipid-like molecules	Fatty Acyls	Eicosanoids	511.581	7	6	4116.4	13494	14235.8	11181.5	7496.42	6415.35	8758.09	5904.25	13358.5	11773.1	3361.75	3605.87	11929.4	5136.28	13624.5	11398.5	11774.2	14581.1	1900.77	11263	11959.9	1487.69	12957.3	9031.5	18253.6	12326.7	2026.05	17326.6	10979.2	11567.7	4035.69	15018.7	2783.12
M86T265	[M+H-NH3]+	1,5-pentanediamine	1.52643	0.925224	0.783788	86.096	264.699	6.55241	HMDB0002322	C01672	Organic nitrogen compounds	Organonitrogen compounds	Amines	266.304	5	8	208686	541675	1.43458e+06	560723	1.77873e+06	938393	277983	1.15646e+06	402963	496663	544862	212685	88177.7	1.04349e+06	675384	252592	425808	995275	678781	1.25233e+06	335017	673819	372615	114240	1.39176e+06	100967	473562	958621	108050	458803	225003	819960	354985
M353T39	[M+H-H2O]+	15(r),19(r)-hydroxyprostaglandin e1	0.469525	1.23338	0.259245	353.231	39.047	1.77565			Lipids and lipid-like molecules	Fatty Acyls	Eicosanoids	61.433	8	10	117958	44245.4	52026.7	57049.4	38255.4	44692.4	52794.9	46416.5	48844.9	45944.2	66964.8	61209.6	49617.2	9967.56	110593	36566.3	77099.6	553.123	74050.7	63658.5	53741	25792.8	58248.2	37009.1	72445.9	71503.8	41902	42938.5	56430.5	22192.5	78738	53316.8	53261.4
M407T327_2	[M+Na]+	17,20-dimethylprostaglandin f1.alpha.	0.114035	1.23645	0.545525	407.289	327.479	0.857048			Lipids and lipid-like molecules	Fatty Acyls	Eicosanoids	329.987	9	8	845.198	2451.19	836.875	15545.8	1243.07	11281.3	4018.2	16102.9	3972.98	16131.7	5183.78	8283.98	14228.9	4271.02	4026.85	13142.6	14858.4	10192.4	18788.8	2829.31	10427.3	10502.3	3924.35	23034.2	3697.29	20503.5	2328.46	10619.9	16959.1	11457.8	15040.5	8817.11	8898.66
M499T27	[M+Na]+	1,7-bis(4-hydroxyphenyl)-5-[(2r,3r,4s,5s,6r)-3,4,5-trihydroxy-6-(hydroxymethyl)oxan-2-yl]oxyheptan-3-one	0.210518	1.14822	0.578093	499.187	27.337	0.861457			Phenylpropanoids and polyketides	Diarylheptanoids	Linear diarylheptanoids	50.981	10	6	10811.9	30516.2	17935.6	7004.52	5213.4	27110.8	9063.01	10309	8148.92	11679.1	11168.6	13235.3	14113.7	7569.83	11870.5	9423.32	14289.7	8618.02	13395	6078.85	11778.6	8100.12	6975.82	13958.6	28874.5	11365.6	3296.26	7350.56	11237.7	8013.61	17165.8	10481.1	8535.08
M309T111	[M+H-2H2O]+	17(r)-hydroxydocosahexaenoic acid	2.46247	1.42827	0.242565	309.205	110.616	7.54111			Lipids and lipid-like molecules	Fatty Acyls	Fatty acids and conjugates	115.7	5	7	93568.8	116434	256500	849588	151784	684126	270750	1.22011e+06	93930	379176	608442	308130	455100	517877	575870	549971	604861	819878	748219	421010	513538	426564	433018	743751	448011	495786	281151	536347	421173	594212	1.07495e+06	483500	454392
M466T243	[M+H-H2O]+	17-trifluoromethylphenyltrinorprostaglandin f2.alpha. ethylamide	0.257463	1.34774	0.247847	466.267	242.954	7.08342			Lipids and lipid-like molecules	Fatty Acyls	Eicosanoids	254.274	7	4	9994.87	9672.18	6310.39	32874.8	9789.47	10208.2	25036.8	14192.9	2263.14	10980.1	21004.5	17746.6	11525.4	10173.1	7818.37	13066.5	29114.9	14346.2	16646.1	17371.1	11285.3	12418.3	6830.42	21069.9	7948.07	10184	13848.3	25355.3	6544.74	24552.9	25060.2	15316.9	9636.35
M453T407	[M+H-H2O]+	17-trifluoromethylphenyltrinorprostaglandin f2.alpha. methyl ester	0.198081	1.0151	0.933339	453.233	406.902	1.9807			Lipids and lipid-like molecules	Fatty Acyls	Eicosanoids	408.854	8	10	13707.5	10253.4	10812.7	11206.2	12975.8	6090.67	10853	9055.65	11046	16836.1	15414	19955.8	10062	6685.28	14854.1	7909.8	5860.89	8581.07	10380.8	5854.96	9677.95	9153.6	6360.37	11367.3	11901.5	20292.2	5837.66	7862.28	7646.2	8604.57	13132.6	15537	7926.47
M361T228	[M+H-H2O]+	1,9-dideoxyforskolin	0.165268	0.969815	0.905418	361.254	227.687	2.92274			Lipids and lipid-like molecules	Prenol lipids	Triterpenoids	231.963	5	6	26653	42293.5	43852.8	11495.2	16666	12013	15985	21872.8	37100.1	8818.69	15103	38025	12912.8	15915	58426.9	17538.2	24049.6	35731.4	33627.4	36899.9	52583.7	61739.4	12006.2	43969	52910.9	14003.5	31951.7	14416.5	44282.4	10915.7	28096.6	28084.8	40763.9
M365T220	[M+H-H2O]+	1a,1b-dihomoprostaglandin f2.alpha.	0.632665	0.654402	0.212119	365.279	219.95	4.11365			Lipids and lipid-like molecules	Fatty Acyls	Eicosanoids	221.279	4	5	13825.9	16911.1	14570	23320.9	17977.2	29261.5	17887.8	31003.9	27656	32639.1	31520	43898	20678.6	75449.3	94479.6	12567.3	16556	18915	38430.9	9775.06	32937.1	17912	27126.9	15325.2	13998.7	23718.3	17861.3	13901.7	22274	14463.7	73368.5	11671.9	40595.3
M562T180_1	[M+H-H2O]+	1-behenoyl-2-hydroxy-sn-glycero-3-phosphocholine	0.178018	0.73748	0.151129	562.419	180.004	6.93996	HMDB0010398		Lipids and lipid-like molecules	Glycerophospholipids	Glycerophosphocholines	186.575	9	5	24026.6	7668.86	11448.2	5289.63	25999.6	13594.3	15327.6	19057.9	8641.45	8869.29	11388.9	10427.2	12783.5	13969.7	23628.6	5953.11	9699.66	10861.3	18729.8	15629.8	7121.78	13659.7	13313	11958.1	8968.6	7097.45	9633.04	12142.2	12834.1	7115.42	16938.4	8606.94	6389.41
M177T183_3	[M+H]+	1-benzylpiperazine	1.39224	0.909271	0.710383	177.138	183.02	2.76947			Benzenoids	Benzene and substituted derivatives	Phenylmethylamines	206.984	10	9	38027.5	9722.87	12547.8	161181	23789.3	211040	138075	189915	61881.5	175064	219903	94034.2	173923	163395	222355	146899	223113	143999	163068	93967.2	168848	81864.7	178401	201067	47103.3	137182	16159.3	158967	152512	143880	247237	117444	139603
M454T510_2	[M+Na]+	1-butanol, 2-[[9-(1-methylethyl)-6-[[[4-(2-pyridinyl)phenyl]methyl]amino]-9h-purin-2-yl]amino]-, (2r)-	0.166783	1.08756	0.692396	454.232	510.204	1.96584			Organoheterocyclic compounds	Pyridines and derivatives	Phenylpyridines	515.671	7	7	2401.06	3368.78	3484.89	8728.89	2767.08	10907.1	3021.8	11942	4857.76	5735.27	5966.79	6011.2	5125.91	12067.5	7494.97	7611.25	7621.62	11268.9	5177.83	11641.9	8219.35	5911.34	6729.91	6410.84	10733.8	4415.83	4224.41	9022.3	6129.05	7187	3218.84	9444.17	4024.38
M146T224	[M+H-H2O]+	1-deoxynojirimycin	0.452006	1.27017	0.445843	146.091	223.847	0.0558608		C16843				257.017	10	10	7279.51	5544	43910.2	18162.6	8089.39	14982	9887.96	12725.7	4009.7	14372	15033.8	5585.95	7006.53	14413	12098.7	15154.3	17096.9	20204.6	10379.9	12278.5	11080.2	10765.1	14575.6	14089	20987.1	7347.67	5546.59	15782.9	9249.19	12930.4	12049.8	13097.7	11910.5
M879T139	[M-H+2Na]+	1-docosahexaenoyl-2-stearoyl-sn-glycero-3-phosphocholine	0.407867	0.867886	0.421519	878.568	138.824	1.53059	HMDB0008727		Lipids and lipid-like molecules	Glycerophospholipids	Glycerophosphocholines	146.714	7	7	21975.2	11790.5	12929.3	22118.5	8476.27	16769.2	14364.3	17428.3	29009.1	17591.3	20457.2	16131.7	28780.9	35603.6	23309.9	15601	23023.6	21998.3	15541.1	19443	23225	21519.3	11462.8	16372.5	82913.4	29382.4	14551.5	24742.9	16563.5	32400.2	15990.6	15664.7	12414.8
M510T195	[M+H]+	1-heptadecanoyl-sn-glycero-3-phosphocholine	0.2019	1.12957	0.43711	510.354	194.758	1.22256	HMDB0012108		Lipids and lipid-like molecules	Glycerophospholipids	Glycerophosphocholines	200.542	10	10	58984.2	146417	52619.8	158010	96010.7	172355	219830	161976	111252	225692	216518	260872	139879	121450	126158	155861	198249	168906	274650	156788	146666	222145	102989	171321	152317	109261	83903.5	105846	70009.5	166029	147215	98446.4	139562
M290T259	[M+H]+	1-heptanone, 1-(4-methoxyphenyl)-2-(1-pyrrolidinyl)-	0.178541	1.00722	0.944844	290.21	258.969	0.0523354			Organic oxygen compounds	Organooxygen compounds	Carbonyl compounds	261.153	10	10	21054.6	26293.5	19659	32082.9	28285.9	16396.2	19690	18844.6	22278.7	17913.9	22924	31867.1	31966	22752.7	33095.4	27549.7	30356.8	27807.5	19721.2	22731.9	30567.1	24614.6	25393.3	30186	29578.3	33664.8	26404.6	15813.9	13071.5	27374.5	21575.9	19464.6	21898.1
M759T149_1	[M+H]+	1-hexadecanoyl-2-octadecadienoyl-sn-glycero-3-phosphocholine	2.46681	1.01281	0.951511	758.568	148.974	1.33546			Lipids and lipid-like molecules	Glycerophospholipids	Glycerophosphocholines	157.416	10	10	2.10481e+06	1.24426e+06	2.29895e+06	2.5449e+06	1.40209e+06	1.18522e+06	1.64591e+06	1.21759e+06	314635	1.87705e+06	1.32456e+06	1.50532e+06	1.62141e+06	1.58022e+06	898128	1.13512e+06	2.35451e+06	2.98145e+06	1.74654e+06	1.05938e+06	1.9402e+06	1.73863e+06	557719	1.42362e+06	5.07384e+06	1.1535e+06	2.28697e+06	1.87205e+06	871839	1.6693e+06	911425	1.57136e+06	1.76463e+06
M793T142	[M+Na]+	1-hexadecyl-2-(8z,11z,14z-eicosatrienoyl)-sn-glycero-3-phosphocholine	1.31766	0.740647	0.177061	792.587	142.311	3.76548			Lipids and lipid-like molecules	Glycerophospholipids	Glycerophosphocholines	150.445	10	10	38659.3	94734.4	27486.7	78672.3	58714.8	60862.3	371256	57633	47148.7	116110	92496.3	79476.3	111522	172631	112731	60389.6	82989.5	137298	152346	380620	128167	141315	40803.4	61412.3	193564	125813	24588.5	88488.2	68413.6	95762.7	105447	147318	75177.7
M482T200_2	[M+H]+	1-hexadecyl-sn-glycero-3-phosphocholine	2.46048	0.91414	0.836387	482.355	199.762	5.96307			Lipids and lipid-like molecules	Glycerophospholipids	Glycerophosphocholines	209.629	10	10	281064	295898	292462	789530	267282	1.01064e+06	371270	559195	170303	629257	645721	472048	264273	1.20321e+06	2.39978e+06	646834	622199	698001	681020	2.04036e+06	635481	669012	833460	351629	368173	157374	255838	494623	520746	643206	40494.7	479658	406065
M564T305	[M+Na]+	1h-indazole-4-carboxamide, n-[(1,2-dihydro-6-methyl-2-oxo-4-propyl-3-pyridinyl)methyl]-1-(1-methylethyl)-6-[2-(4-methyl-1-piperazinyl)-4-pyridinyl]-	0.334045	1.15748	0.386519	564.305	305.056	2.51077			Organoheterocyclic compounds	Diazinanes	Piperazines	306.292	9	9	8013.14	10909.9	12939.8	28537.2	20994.7	26350.7	17864.6	23294.5	12273.9	21926.9	17954.4	17135.1	8903.82	19656.9	19265.2	18012.2	19282.3	24321.8	18166.8	17992.6	16912.1	12831.5	27764.6	14622.9	20386.6	9870.67	14034.5	21040.5	14461.9	18675.4	11941.3	15518.5	15726.3
M248T56	[M+H-C10H9N]+	1h-indole-3-carboxamide, 1-(5-chloropentyl)-n-1-naphthalenyl-	0.281616	0.813404	0.439778	248.092	56.453	0.548176			Organoheterocyclic compounds	Indoles and derivatives	Indolecarboxylic acids and derivatives	74.451	8	8	18066.4	4828.07	9705.03	6331.95	19696.1	25202.5	20621.9	6193.15	2889.39	25345.4	28473.9	8920.4	8518.67	10508.5	20585.3	29982.7	20800.9	28869.9	10639.2	14322.5	7777.93	12194.7	9100.63	10088.9	6186.31	8030.45	4883.14	5713.71	9742.51	10426.2	6385.66	21287.3	4909.37
M247T48_2	[M+H]+	1h-indole-3-ethanamine, 5-methoxy-n-methyl-n-(1-methylethyl)-	0.339581	0.936194	0.660029	247.167	48.3895	6.6281			Organoheterocyclic compounds	Indoles and derivatives	Tryptamines and derivatives	59.171	10	10	27431.1	41887.5	49921.8	68255.2	72366.7	89357.3	28695.8	31218.3	62673.7	58918.5	152356	84536.2	80595.4	50641.3	34200.5	34113	73965.6	42811.6	59098.6	88183.8	58235.4	106500	53288.1	169444	93788.9	30152.1	51661.1	43924.3	69110.9	46697.4	66695.5	42958.9	31468.4
M568T454	[M+H]+	1h-indole-5-sulfonamide, n-(3-chlorophenyl)-3-[[3,5-dimethyl-4-[(4-methyl-1-piperazinyl)carbonyl]-1h-pyrrol-2-yl]methylene]-2,3-dihydro-n-methyl-2-oxo-, (3z)-	0.981689	1.45299	0.3788	568.183	454.358	1.93012			Benzenoids	Benzene and substituted derivatives	Sulfanilides	466.959	8	8	37918.4	175393	42935.8	52270.6	42828	35862.6	166231	56359.9	91510.7	35839.7	18896.4	45710.4	8254.76	27241.4	26041.4	37167.8	26292.9	33552.9	28001.2	30272.1	27145.4	12573.9	38004	12495.8	17155.2	7602.44	29288	42369.7	12024.3	34000.2	12854.1	17054.2	23361.6
M459T262	[M+H]+	1h-pyrrole-2-carboxamide, n-[1-(3-chloro-4-fluorophenyl)-2-hydroxyethyl]-4-[4-(3-chlorophenyl)-1h-pyrazol-3-yl]-	0.201549	1.17677	0.550209	459.064	262.148	4.76689			Organoheterocyclic compounds	Azoles	Pyrazoles	264.324	10	8	1531.29	1304.17	2244.24	7349.71	2058.17	8954.81	7660.5	4872	2102	6548.03	6717.03	4121.49	2724.41	2491.03	5390.32	7688.12	9880.58	10575.1	3991.09	4253.75	7925.52	2103.27	9840.1	10251.8	3388.55	2456.24	1713.35	8325.45	8682.1	3515.03	12592	3630.71	6142.83
M395T36	[M+H-H2O]+	1-hydroxy vitamin d2	0.469568	0.950017	0.771813	395.328	35.628	5.9229		C08211	Lipids and lipid-like molecules	Steroids and steroid derivatives	Vitamin D and derivatives	49.143	10	8	117165	83168.1	138740	92242.2	145641	86990.3	100716	37597.2	75287.1	66543.5	52741.3	59842.8	84648.6	86030.1	67404.9	49448.2	58861.3	78776.3	72915.4	64218.6	91521.9	91214.7	48156.8	60213.3	75729.4	74086	131853	64000.1	59535.3	58702.6	55488	131691	62831
M126T370	[M+H]+	1-methylhistamine	1.06891	0.851974	0.71793	126.102	369.848	5.26878	HMDB0000898	C05127	Organic nitrogen compounds	Organonitrogen compounds	Amines	381.104	10	10	85252.6	15020.9	99416.8	31656.5	19261.5	207842	136825	64235.4	8457.19	92091.2	206348	72783.8	39931.9	131028	433208	45175	133474	118656	62438.9	160777	115837	159900	173200	69374.9	57063.5	43185.5	41786.2	167442	19321.1	128329	26412.3	82197.6	72430.7
M124T47	[M+H-CH2O2]+	1-methyl-l-histidine	0.305217	1.1253	0.476215	124.086	47.294	1.7981	HMDB0000001	C01152	Organic acids and derivatives	Carboxylic acids and derivatives	Amino acids, peptides, and analogues	61.404	6	5	166442	173206	148549	156961	105870	128645	115927	94478.6	117706	133223	108988	83953.6	173526	123330	142478	135794	167180	148540	109542	143182	103623	117762	6448.9	133476	172084	135671	195213	122736	139428	113008	60913.1	149321	169146
M355T36_2	[M+H]+	1-monolinoleoyl-rac-glycerol	1.98343	0.93453	0.754396	355.283	35.905	1.61007			Lipids and lipid-like molecules	Fatty Acyls	Lineolic acids and derivatives	48.407	10	10	399503	155547	226149	523925	169974	376510	720462	355012	207353	489769	536160	397830	272301	359695	243937	527316	433269	688295	476986	508491	581264	494578	656240	426472	666560	235062	648148	481067	295712	684097	343948	360598	376939
M426T206	[M+H]+	1-myristoyl-2-hydroxy-sn-glycero-3-phosphoethanolamine	1.16554	1.11285	0.754858	426.26	205.65	4.90467	HMDB0011500		Lipids and lipid-like molecules	Glycerophospholipids	Glycerophosphoethanolamines	209.301	10	10	36394.3	111473	17884	427731	35650.9	320076	318155	536337	19776.8	312069	282735	282045	504178	265021	203092	562179	551765	470645	350531	374959	766063	187861	243391	433833	367177	581948	33838.1	363410	731994	644075	702968	181248	177249
M599T631	[2M+H]+	1-naphthalenesulfonic acid, 8-(phenylamino)-	0.2537	1.47889	0.191007	599.139	630.962	2.27587	HMDB0061854	C11326	Benzenoids	Naphthalenes	Naphthalene sulfonic acids and derivatives	647.42	10	10	3356.28	9040.47	4160.48	11449.4	2444.94	4195.61	1988.81	8576.96	3788.74	4437	3938.77	3076.03	7489.83	2828.71	3249.66	8597.73	3994.56	3991.82	2230.72	5967.08	2482.78	3880.53	2142.84	1793.14	2428.52	2592.9	2791.76	2638.26	2605.19	2071.67	9884.14	2022.78	1714.65
M154T177	[M+H]+	1-naphthonitrile	0.215031	0.93667	0.575402	154.072	177.355	0.30439						205.06	10	8	58844.1	27993.5	36171.9	50220.6	38660.5	39306	28781.3	28042.8	39822.4	38998.1	38864.2	12965.6	34753	24141.3	62539.1	17434.1	43677.8	48113.6	38301	11690.6	18274.4	34208.1	41507.7	26516.9	38638.8	29565.4	43227.3	30343.9	18411.6	29904.3	42945.4	44214.8	30232.1
M811T40	[M+Na]+	1-octadecanoyl-2-octadecenoyl-sn-glycero-3-phosphocholine	0.179347	1.17079	0.361112	810.598	39.875	3.73479			Lipids and lipid-like molecules	Glycerophospholipids	Glycerophosphocholines	41.851	8	7	53989.3	45434.8	42547.5	83730.3	41858.5	88637.9	55847.8	71434.5	43270.3	77243.6	32646.2	41986.5	53033.7	23599.3	81297.9	82533.6	70417.4	86182	50404.9	52094.9	88189.1	60941.2	56764.8	61220.4	67044.1	82356.8	32066.9	86632.1	17117.9	94306.3	34298.1	72951.6	49308.6
M304T243	[M+H]+	1-octanone, 1-(4-methoxyphenyl)-2-(1-pyrrolidinyl)-	0.225765	1.06884	0.529612	304.226	242.928	1.49452			Organic oxygen compounds	Organooxygen compounds	Carbonyl compounds	254.789	10	10	23552.5	28501.1	24160.8	19700.5	28483.3	24021.5	19816.2	30353.7	10682.9	23345.9	26451	35018.5	31024.3	22090.5	25915.9	23623.3	29879.9	23800.5	29262.7	32138.1	25899.7	28114.9	20517.5	28996.2	39151.2	29111.1	30824.2	17566.5	21468.6	23647.9	30858.8	18323.2	21028
M550T191	[M+H]+	1-o-hexadecyl-2-o-(2e-butenoyl)-sn-glyceryl-3-phosphocholine	0.860607	1.0044	0.980572	550.384	190.712	0.900427			Lipids and lipid-like molecules	Glycerophospholipids	Glycerophosphocholines	197.392	10	10	71186.4	143355	91548.6	183917	121494	206315	192379	182693	85788.5	231359	232600	240864	125027	162452	144354	177558	233269	256391	342332	187056	172807	248256	106992	178760	191393	85561.5	103552	188790	88629	205819	162522	146141	148298
M618T132	[M+K]+	1-o-hexadecyl-2-o-acetyl-sn-glyceryl-3-phosphoryl(n,n,n-trimethyl)hexanolamine	0.533361	0.943844	0.781644	618.366	131.757	0.56752						139.738	10	8	11437.1	19882.2	17196.2	34251	16707.7	40687.2	46409.9	37819.4	22310.9	68574.5	50916.7	40258.3	40280.5	31069.7	48915.3	39616.7	57540.2	29241.8	38942.3	23085.8	55069.6	23262.5	42779.4	62976.8	16413.9	32585.1	16412.1	60134	34579.6	35249.5	60638.1	26244.1	48583.4
M421T234	[M+Na]+	1-oleoyl-2-acetyl-sn-glycerol	0.159108	0.999404	0.997528	421.303	233.85	2.48543			Lipids and lipid-like molecules	Glycerolipids	Diradylglycerols	236.694	10	10	71003.6	56210.1	41005.3	76533.8	48339.7	89101.4	61963.4	100916	30434.6	78960.3	116200	52616.2	156368	58125.1	92772.2	114201	109975	100035	66379.1	58627	109155	48993.3	75827.5	99823.1	50927.3	85276.8	92344.2	48053.6	55541.9	64268.4	67592.5	62101.1	53144.6
M733T38	[M+H]+	1-oleoyl-2-myristoyl-sn-glycero-3-phosphocholine	1.06353	1.13465	0.521023	732.545	38.457	2.75738	HMDB0008097		Lipids and lipid-like molecules	Glycerophospholipids	Glycerophosphocholines	51.617	9	9	216200	252012	131982	162751	135450	143686	111699	56868.2	121127	157083	154852	144475	111233	84720.9	114702	104476	42851.9	92902.2	73656.8	123780	139897	88409.6	75621.2	128099	253441	98017	266716	113676	78925	78626.5	83249.7	111018	77088.6
M522T194_7	[M+H]+	1-oleoyl-sn-glycero-3-phosphocholine	5.63386	1.20836	0.475068	522.354	193.755	0.259697	HMDB0002815		Lipids and lipid-like molecules	Glycerophospholipids	Glycerophosphocholines	199.952	10	10	1.77135e+06	1.4804e+06	2.19079e+06	4.67717e+06	1.60856e+06	4.31929e+06	4.00814e+06	4.45902e+06	847616	4.43937e+06	4.77448e+06	3.36977e+06	1.69398e+06	3.11061e+06	2.33433e+06	4.04463e+06	6.39811e+06	7.97368e+06	5.17023e+06	3.56038e+06	5.00089e+06	3.38782e+06	3.58502e+06	5.96823e+06	4.21828e+06	1.99474e+06	2.35025e+06	4.47213e+06	1.93488e+06	3.9805e+06	3.08257e+06	1.90757e+06	3.99334e+06
M807T145	[M+H]+	1-palmitoyl-2-docosahexaenoyl-sn-glycero-3-phosphocholine	0.670918	0.94259	0.644886	806.566	144.715	2.83783	HMDB0007991		Lipids and lipid-like molecules	Glycerophospholipids	Glycerophosphocholines	152.684	10	10	213998	107452	111824	175224	120826	181056	201750	148400	137427	141106	199290	121987	225356	161097	134399	144224	177006	228387	159590	100975	153593	188602	67757.1	149644	625473	212318	128681	140020	151324	184501	153604	118037	135511
M632T402	[M+Na]+	1-palmitoyl-2-glutaryl phosphatidylcholine	0.360969	1.24631	0.612505	632.359	402.236	2.18167			Lipids and lipid-like molecules	Glycerophospholipids	Glycerophosphocholines	404.611	10	10	952.277	3050.6	1107.16	19822	2561.69	32983.5	5136.46	12809.3	2702.37	9019.9	21010.1	7628.07	1559.8	25659.5	5267.66	12553.4	9743.5	9127.99	11203.2	11620.5	6910.21	5076.51	3733.56	3560.96	25750.5	2901.12	5964.69	12776	5692.19	13861	4129.02	11609.6	8076.91
M454T201	[M+H]+	1-palmitoyl-2-hydroxy-sn-glycero-3-phosphoethanolamine	3.1585	1.18698	0.556901	454.292	201.452	1.3079	HMDB0011503		Lipids and lipid-like molecules	Glycerophospholipids	Glycerophosphoethanolamines	205.801	10	10	278629	659201	325056	2.58051e+06	497233	2.08945e+06	1.85366e+06	2.92326e+06	321895	1.76118e+06	1.85802e+06	1.56236e+06	2.12147e+06	1.64149e+06	1.42518e+06	2.9873e+06	3.01552e+06	2.96865e+06	1.94551e+06	2.17806e+06	3.22447e+06	1.43472e+06	1.39532e+06	2.49722e+06	2.04111e+06	2.25108e+06	368126	2.1822e+06	2.7414e+06	2.89863e+06	2.45921e+06	1.06675e+06	1.27625e+06
M615T33_3	[M+Na]+	1-palmitoyl-2-linoleoyl-rac-glycerol	1.76098	1.11527	0.510937	615.493	32.519	4.11197			Lipids and lipid-like molecules	Fatty Acyls	Lineolic acids and derivatives	33.997	10	10	616087	221010	459176	511617	355335	392899	444447	424904	132006	494272	433795	373383	275365	645828	241242	289234	429590	490522	574866	520178	290319	292466	249225	394416	961368	245382	1.23768e+06	506559	238292	395090	275954	484477	541809
M602T32	[M+H-C16H32O2]+	1-palmitoyl-2-oleoyl-3-linoleoyl-rac-glycerol	0.455942	1.14991	0.56772	601.517	31.727	0.121638			Lipids and lipid-like molecules	Glycerolipids	Triradylcglycerols	33.367	10	10	164439	41258.4	94101.5	137058	81801.8	49795.6	85659.1	22908.3	61104.5	91160.9	99324.6	74535.1	47970.9	152094	48599.9	44976.5	76458.4	101476	149634	99859.2	139272	57013.8	64617.6	112047	265778	215964	270239	182416	55695.9	109550	80826.1	109956	121148
M618T32_1	[M+Na]+	1-palmitoyl-2-oleoyl-sn-glycerol	1.48499	1.19742	0.368173	617.509	31.989	2.78474	HMDB0007102		Lipids and lipid-like molecules	Glycerolipids	Diradylglycerols	36.518	7	8	523502	86191.2	238958	393342	296992	342660	169909	187789	124338	243851	281193	372405	137878	470536	274978	57078.4	287902	370312	474789	347576	353471	70598.9	301144	165074	797588	427936	1.02232e+06	328977	381118	95813	300767	389116	396548
M313T34_2	[M+H-H2O]+	1-palmitoylglycerol	2.95552	0.85472	0.295303	313.273	34.238	3.7863			Lipids and lipid-like molecules	Glycerolipids	Monoradylglycerols	35.628	10	10	574994	708866	793470	829019	855363	1.03439e+06	1.09631e+06	1.06476e+06	1.45481e+06	675153	2.43801e+06	747738	1.23777e+06	2.09199e+06	1.476e+06	1.0236e+06	1.09499e+06	1.20164e+06	1.05318e+06	1.49399e+06	1.25561e+06	988588	1.1395e+06	821738	2.17205e+06	1.57836e+06	1.35411e+06	1.04029e+06	1.02113e+06	1.43313e+06	1.31868e+06	1.29637e+06	971523
M496T197_2	[M+H]+	1-palmitoyl-sn-glycero-3-phosphocholine	8.85146	1.13547	0.601905	496.339	196.593	2.28558	HMDB0010382		Lipids and lipid-like molecules	Glycerophospholipids	Glycerophosphocholines	202.132	10	10	4.78012e+06	6.06299e+06	4.55059e+06	1.41738e+07	4.66111e+06	1.44009e+07	1.53368e+07	1.58893e+07	3.85779e+06	1.40198e+07	1.38636e+07	1.04432e+07	6.77e+06	1.08682e+07	9.7405e+06	1.297e+07	1.70488e+07	2.11679e+07	1.57618e+07	1.28829e+07	1.68053e+07	1.13817e+07	1.11651e+07	1.56425e+07	1.25393e+07	6.20189e+06	5.53459e+06	1.31485e+07	7.10175e+06	1.3829e+07	9.95459e+06	6.1367e+06	1.06332e+07
M356T253	[M+H]+	1-pentyl-3-(4-methylnaphthoyl)indole	0.0856079	1.0122	0.915264	356.218	253.421	2.80568			Organoheterocyclic compounds	Indoles and derivatives	Naphthoylindoles	266.094	10	10	27351.3	20138.1	31328.1	26559.9	17293.2	14660.7	21584	23157.5	26441.4	23285.2	19811	24967.9	26199.3	20731.3	35705.7	17784.4	23627.9	53896.6	17558.2	24182.3	20690.9	37037.3	18541.2	25068.9	19076.2	21549.5	16551.4	18160.5	18262.5	48763.7	28397.4	18760.4	16177.2
M181T217	[M+H]+	1-(p-fluorophenyl)piperazine	1.34392	0.928664	0.763379	181.132	217.187	0.309566			Organoheterocyclic compounds	Diazinanes	Piperazines	219.228	10	10	40335.6	20412.9	14504.6	186518	31717.7	210316	167682	232739	118641	213666	237056	127849	178766	166527	253796	207436	234143	182415	196721	110541	204205	91593.1	201306	232515	53332.4	157265	26647.6	163575	173770	148690	268779	112733	148325
M155T108	[M+H]+	(1r,5s)-9-methyl-9-azabicyclo[3.3.1]nonan-3-amine	0.464747	1.3727	0.269188	155.142	107.606	5.15116			Organoheterocyclic compounds	Piperidines	Aminopiperidines	113.12	9	8	53916.1	49930.5	3880.34	29269.6	47819.5	45965	9255.31	80963.7	61736.1	16313.8	38465	7236.8	18963.7	20258.9	28254.9	27779	39054.9	35739.9	40314.9	25283.3	33655	12644.2	34278.5	46127	13120.6	19555.7	58571.5	34911.6	25401.7	36795	78476.1	16508.3	35372.6
M151T191	[M+H-H2O]+	(1r)-chrysanthemolactone	0.698192	0.994051	0.979954	151.122	190.539	4.81965						203.683	10	10	73575.2	14366.7	16244.8	74881.5	14116.7	59188.2	45351.7	71307.1	26256.1	97452.6	100788	26644.5	51889.4	76851.8	101528	74913.6	95942.9	51118.2	50147.3	42044	76549.6	30083.9	52451.3	84688.4	27008.2	45379.6	12802.8	54329.5	67650.6	42641.9	71967.4	35486.1	64477
M888T32	[M+H]+	1-stearoyl-2-arachidonoyl-sn-glycero-3-phospho-(1'-myo-inositol)	3.16999	0.385923	0.317195	887.564	32.455	2.69133	HMDB0009815		Lipids and lipid-like molecules	Glycerophospholipids	Glycerophosphoinositols	49.874	7	7	209615	52704.5	54731	42072.2	62147.9	36946.5	43516.7	25682.1	1.08472e+06	41026.7	39317.8	49656.1	46028.1	39362.4	44370.3	54016.9	36830.4	51703.6	46598.5	41591	49011.3	49766.2	33242	26772.5	51359.9	50220.6	65414.2	28476.2	45137.4	35624.7	38139.3	40147.1	45544.8
M506T186	[M+H-H2O]+	1-stearoyl-2-hydroxy-sn-glycero-3-phosphocholine	1.28244	0.805079	0.366442	506.358	186.097	2.92	HMDB0010384	C04230	Lipids and lipid-like molecules	Glycerophospholipids	Glycerophosphocholines	203.481	9	9	35934.8	149347	29392.9	140336	93128.7	179088	599063	223053	272287	286884	239893	197342	147484	211050	320197	77178.7	123423	182256	424467	184382	152336	306841	77848	106857	136742	187624	40976.5	117270	62161.5	96082	169459	160622	157194
M819T229	[M-H+2Na]+	1-stearoyl-2-linoleoyl-sn-glycero-3-phospho-(1'-rac-glycerol)	0.148602	0.936552	0.730936	819.491	229.192	0.0810009			Lipids and lipid-like molecules	Glycerophospholipids	Glycerophosphoglycerols	231.375	5	5	5660.08	15678	4407.41	7297.67	7966.33	6256.62	7281.83	7684.7	7204.38	9049.46	5762.99	5302.34	6096.09	7171.58	13458.5	6786.47	6331.08	6163.74	7029.46	7633.45	8619.11	8091.84	5759.61	7889.02	9810.75	3451.19	4333.79	5389.78	5401.8	5689.06	5812.36	4559.41	5147.45
M335T254	[M+H-H2O]+	20-hydroxyleukotriene b4	0.975096	1.22357	0.0561199	335.232	254.011	5.15548			Lipids and lipid-like molecules	Fatty Acyls	Eicosanoids	256.34	10	10	75041	93291.3	75595.2	70108.6	76473.7	45115.5	43841.5	52277.5	49562.9	51286.8	52532.3	99988.3	65123.8	50767.4	62150.1	47524.8	67608.5	46912.5	58320.5	78841.2	39830.2	65306.7	48212.5	53901.3	81292.5	75009.1	82537	25756.2	39903.3	57560.9	49880.2	56858.7	50536.3
M479T265	[M+H-NH3]+	21-deacetoxy-11-oxodeflazacort-3,20-hydrazinecarboxamide	0.508258	1.46975	0.278688	479.244	264.701	1.50746			Lipids and lipid-like molecules	Steroids and steroid derivatives	Pregnane steroids	267.594	4	8	31009.5	20366.2	18400	9615.9	24230.3	54076.6	5140.88	70299.4	6623.9	43143	37636.4	13968.5	13175.3	13918.1	8976.21	49833.7	46542.9	43520.2	43927.9	17235.3	52616.5	11466.8	47229.4	2894.74	18104.9	7018.26	14268.3	40316.8	4347.33	38236.3	11740.7	12600.1	37173.2
M96T53	[M+H]+	2(1h)-pyridinone	0.394594	0.854569	0.609999	96.0436	53.152	4.34494	HMDB0013751	C02502	Organoheterocyclic compounds	Pyridines and derivatives	Hydropyridines	74.08	10	10	156051	29685.7	110569	38272.1	72421.4	47263.6	52656.8	29795.3	108171	44274.2	48537.3	48772.7	23711	55474.3	78763.3	33754	22839.3	26528.8	22732.2	67621.2	20929.7	31623.1	37400.3	38121.8	25658.1	23366.7	75368.6	30593.2	20507.9	31217.3	29138	28701	30730
M366T389	[M+H]+	2(1h)-pyridinone, 3-[(2s,4s,5r)-5,6-dichloro-2,4-dimethyl-1-oxohexyl]-4-hydroxy-5,6-dimethoxy-	0.540828	1.38422	0.617025	366.063	389.344	1.89675			Organic oxygen compounds	Organooxygen compounds	Carbonyl compounds	405.69	9	9	114209	5459.96	52969.8	30915.6	22515.6	39938.1	4403.17	2848.33	10215.8	8980.37	17818	4005.55	6506.9	2536.81	4634.95	18314.7	7099.21	169956	11010.1	3857.26	3056.19	4305.61	32345.6	2891.02	29148.5	4334.53	144833	27233.8	2514.27	31493.3	1317.27	72907.9	18756.2
M558T27	[M+Na]+	2-(21-amino-3,20-dihydroxydocosan-2-yl)oxy-6-(hydroxymethyl)oxane-3,4,5-triol	0.796302	1.07858	0.767645	558.392	27.0245	2.7645			Lipids and lipid-like molecules	Fatty Acyls	Fatty acyl glycosides	36.58	10	9	23920.5	38060.4	44473.2	132230	14254.2	134600	217084	176801	20572.4	129298	140776	103467	114053	83754.6	188217	186398	117227	118069	146957	171328	122633	99083.1	193236	221103	47682	120451	29225.1	156442	162832	81619.3	143636	117088	125032
M199T420	[M+H]+	2,2'-azobis-2-methylpropanimidamide	1.88567	0.656714	0.220604	199.154	419.786	2.8036			Organic nitrogen compounds	Organonitrogen compounds	Azo compounds	446.452	10	8	21862.5	22150.2	16429.5	70468.5	21862.9	62239.9	117009	152835	37333.8	172867	216693	89556.8	74260.4	151000	199652	125315	210150	42529.3	110347	43151.3	156315	31992.7	44564.4	38194.3	14462.4	93958.3	2539.07	30395.7	123863	126728	71814.4	118000	43941.7
M352T255	[M+H]+	2-(2h-benzotriazol-2-yl)-4,6-di-tert-pentylphenol	0.226848	1.17157	0.364666	352.247	255.202	0.705445			Organoheterocyclic compounds	Azoles	Triazoles	258.911	7	8	13932.5	24620.6	12632.2	20359.1	19357.4	20566.2	19282.6	53860	18430.3	24697.2	23290.7	19810.1	24004	20158.8	23006.5	18791.4	25604.9	22977.7	21198.3	18025	22977.2	16315	23136.9	23293.1	16224.9	20309	14721.7	13756.2	18897.4	20652.2	22429.7	19016.1	16329.3
M511T290	[M+H]+	2-[(2r,4as,8s,8as)-8-[2-[(4as,7r,8ar)-7-(1-carboxyethenyl)-1-hydroxy-4a-methyl-2-oxo-6,7,8,8a-tetrahydro-5h-naphthalen-1-yl]ethyl]-4a-methyl-7-oxo-1,2,3,4,8,8a-hexahydronaphthalen-2-yl]prop-2-enoic acid	0.756506	1.35813	0.367398	511.289	290.324	0.58525			Lipids and lipid-like molecules	Prenol lipids	Sesquiterpenoids	305.896	10	4	17262.6	21265.7	57120	160223	25503.5	117688	91323.5	43986.9	26755.1	106120	126220	101938	29684.7	31463.3	60092.6	39397.7	168974	70230.5	114736	104097	59444.1	67561.5	54029.1	162301	111022	28042.3	70483.1	170935	56405.8	85414.3	128288	132756	111678
M741T461	[2M+H]+	2',3',5'-triacetyl-5-azacytidine	0.174604	0.841397	0.691472	741.252	460.677	1.59603			Organic oxygen compounds	Organooxygen compounds	Carbohydrates and carbohydrate conjugates	463.656	7	6	2169.72	1802.49	2481.1	3848.4	1850.31	3392.62	5717.98	4548.02	3276.62	8170.29	2827.7	2240.36	5902.13	2887.96	5702.86	1610.34	3921.81	2981.82	3817.56	2643.15	9393.44	2820.41	2090.28	4246.54	3275.37	19995.1	1576.48	4884.86	7364.25	2421.9	9243.62	1953.05	2637.66
M246T132	[M+H-CH4]+	2,4,6-tri-tert-butylaniline	0.225056	0.833574	0.112894	246.221	131.971	3.30024			Benzenoids	Benzene and substituted derivatives	Phenylpropanes	139.738	7	6	12567.4	13342.4	17318.1	12366.2	18496.8	14060.5	9434.3	11730.2	13386.7	13742.5	12279.6	18387.4	23281.8	14880.9	13125	12837.2	11313.1	14154.2	9983.8	17195.1	9243.8	15216.8	9520.72	11029.4	24243.5	14358.5	20231.3	9206.12	13111.1	11749.9	12086.1	15495.5	10002.8
M128T35	[M+H-NH3]+	2-(4-amino-1-piperidinyl)ethanol	0.823603	1.19004	0.0290842	128.106	34.869	2.79103			Organoheterocyclic compounds	Piperidines	Aminopiperidines	43.861	4	9	31504.5	65897.5	53885.5	42242.2	51047.1	61356.9	33000	58098.8	44071.7	138041	34380.9	29434.7	49964.3	49469.5	61029.5	19230.7	54811.5	39886.8	37316.7	46037.2	45723	33272.3	14390.4	51876.4	60923.7	62396.4	46223.4	37532.8	37864.9	12440.6	63193.7	31124.4	50535
M123T234	[M+H]+	2,4-diaminotoluene	0.213899	0.995295	0.970221	123.09	234.385	1.7613	HMDB0041799	C14401	Benzenoids	Benzene and substituted derivatives	Toluenes	237.181	9	10	29434.2	21127.4	27283.4	34923.1	28076	26746.5	20160.8	37078	20021.6	26590.2	26490.8	26343.1	18281.7	37082.6	34929.8	28298.2	30483.4	40117.5	34324.9	31962.2	27574.1	23409.2	31604.9	17895.6	30853.4	18273.7	43936.8	31330	18297.6	20684.6	18750.6	21601.7	19647.4
M732T198	[M+Na]+	2-[[5-[[2,12-dihydroxy-4,4,10,13,14-pentamethyl-17-(1,5,6-trihydroxy-6-methylheptan-2-yl)-2,3,5,6,7,11,12,15,16,17-decahydro-1h-cyclopenta[a]phenanthren-3-yl]oxy]-3-hydroxy-3-methyl-5-oxopentanoyl]amino]acetic acid	0.531776	1.02005	0.959824	732.448	198.357	0.971509	HMDB0036440		Lipids and lipid-like molecules	Prenol lipids	Triterpenoids	217.171	7	8	10919.8	52387.8	8516.51	7766.17	10484	8840.35	10334.1	3087.99	16783.5	7606.13	5825	37453.2	21910.3	9100.82	7233.29	9482.67	6451.7	6822.1	7752.55	7928.33	3177.56	10459.6	5025.06	8365.57	7560.46	10105.6	5880.03	8356.92	6024.56	10543.1	15740.8	17180.3	6537.83
M823T446	[M+Na]+	2,5,8,9-tetracetoxy-15-hydroxy-3-benzoyloxyacetoxy-7-isobutyroyloxy-14-oxojatropha-6(17),11e-diene	0.0885612	1.18529	0.381044	823.305	446.305	2.21379			Lipids and lipid-like molecules	Prenol lipids	Diterpenoids	448.592	6	4	4181.24	4988.79	3193.79	6238.64	2682.13	2548.1	2842.29	3548.82	4233.85	3969.07	2920.74	2311.39	2616.72	3894.55	2985.75	792.728	2810.93	4877.83	3247.57	3621.76	3701.5	1491.73	2439.27	1800.02	3385.41	1813.68	2448.43	4391.48	1652.29	2791.72	3246.91	2821.4	2075.96
M285T338	[2M+H]+	2,5-diamino-4,6-dihydroxypyrimidine	0.273456	1.0892	0.589906	285.109	338.488	3.38201			Organoheterocyclic compounds	Diazines	Pyrimidines and pyrimidine derivatives	355.983	5	7	4464.94	12887.6	18093.4	19741	24092.8	14681.3	5411.2	11555.8	13839	18003	9717.65	12468.5	6222.92	10998.2	11554.9	13060.4	11124.8	18913.1	14520.2	24445.7	11032	20362.1	10464.5	8130.16	33931.7	16769.9	21059.8	13205.7	7118.85	14656.4	11669.6	20403.3	8821.05
M179T343	[M+H-C2H7N]+	2,5-dimethoxy-4-ethylamphetamine	0.241679	0.973397	0.80083	179.106	343.301	1.06612			Benzenoids	Benzene and substituted derivatives	Phenethylamines	345.156	10	10	18325.8	26675	17835.2	17521.8	25185.5	15862.5	12227.3	18370.4	21484	25070.3	12908.6	17780.6	10962	14162.1	16130.4	9464.18	20166.1	23178.6	18466.8	20579.1	15824.2	22274.7	11603	17856.3	28649	18828.4	27505	16978.8	17997.4	16184	20924.5	25696.9	12906.5
M210T379	[M+H-NH3]+	2,5-dimethoxy-4-nitrophenethylamine	0.557626	0.972681	0.82105	210.075	379.027	5.54467			Benzenoids	Benzene and substituted derivatives	Nitrobenzenes	381.104	10	10	42726.4	74221.3	62102.9	41974.5	74757.8	41518.7	37220.2	42364.1	63235.3	52707.8	38794.9	34090.1	41570.1	37057.8	41217.8	29001.4	44087.3	37841.6	36430.2	42116.6	34569.6	37037.6	32797.4	31123.9	44070.6	34105.1	73194	29183.2	38728.6	29829	38724.9	47903.7	37707.4
M200T200	[M+H]+	2,5-dimethyl-1-phenyl-1h-pyrrole-3-carbaldehyde	0.411786	1.03676	0.820415	200.106	200.404	0.347689			Organoheterocyclic compounds	Pyrroles	Substituted pyrroles	204.783	10	10	21704.6	18617.3	56459.8	49996.2	17639	51111	33745.4	48317.6	40035.7	46969.1	61292.6	36708.6	44803.7	42013	76952.3	50530.9	62884.1	43971.1	44184.8	57541.6	45442.1	31269.7	52829.3	60045.8	25575.8	42353.4	25946.4	39587.9	42427.1	42667.5	58280.4	46973.7	61479.8
M403T134	[M+H]+	25-Hydroxycholesterol	0.798748	0.618767	0.0493529	403.369	133.669	0.263565		C15519	Lipids and lipid-like molecules	Steroids and steroid derivatives	Cholestane steroids	150.515	10	8	10377.1	2671.66	2222.58	24848.7	5430.39	10865	13532.1	13273.7	18630.4	16648.6	27262	23360.8	29013.6	33042.6	18673.6	20015.6	14997.3	20418.6	20138.4	13351.3	25624.6	12617.3	13979.4	22523.3	8032.58	19690.5	6491.78	10841.9	14939.9	16731.4	27949.4	18018.7	9422.53
M415T251	[M+H]+	(25s)-7-dafachronic acid	0.97351	1.09705	0.612537	415.315	250.566	2.31618			Lipids and lipid-like molecules	Steroids and steroid derivatives	Bile acids, alcohols and derivatives	266.304	10	10	75395.2	378115	91767.5	124730	364358	176521	86780.2	247879	144022	272513	114578	151058	205421	235955	220675	171464	255536	231946	137851	298027	94038.8	245623	90484.6	114964	164440	141814	122969	113085	190196	218983	168315	204641	201552
M155T294_2	[M+H]+	2,6-dimethoxyphenol	1.44978	0.951423	0.776391	155.081	294.246	2.87148	HMDB0034158	C10787	Benzenoids	Phenols	Methoxyphenols	309.748	10	10	188530	130548	222148	277612	214976	332640	370475	230899	44858.1	242308	466378	272826	350229	267422	490468	272651	472458	368206	326753	280803	290256	244742	450748	313260	262291	206689	123973	187297	277705	270721	475904	333553	350778
M219T120_3	[M+H-H2O]+	2,6-di-tert-butyl-4-hydroxymethylphenol	2.10229	0.686481	0.426019	219.173	120.492	4.75288	HMDB0032048		Benzenoids	Benzene and substituted derivatives	Phenylpropanes	138.795	10	9	39995.8	13283.8	19878.7	47175.5	16688.4	66949.8	52082.2	105496	481688	65349.8	118078	50967.8	48437.9	211823	201948	96351.2	288365	92614.5	62342.1	30330.9	51738.7	180229	87279.6	100541	23979.6	55588.8	13565.2	43418.3	169975	60776.1	90898.1	74324.7	47181.4
M251T125	[M+H]+	2,8-dimethyl-2-(.beta.-carboxyethyl)-6-hydroxychroman	1.0638	1.01002	0.960177	251.149	125.262	6.02975			Organoheterocyclic compounds	Benzopyrans	1-benzopyrans	131.985	10	10	104780	33593.7	82875.6	137290	50931.2	161222	72193.7	120212	9237.66	146874	248554	90425.6	111631	132358	177543	119841	155097	111684	103708	177111	110448	68383	100076	133219	168354	87387.4	97741.7	173156	112287	104835	156283	127083	113764
M120T260	[M+H-H2O]+	2-amino-1-phenylethanol	3.3309	0.971741	0.928042	120.08	259.944	4.8218	HMDB0001065	C02735	Organic nitrogen compounds	Organonitrogen compounds	Amines	267.914	10	10	358329	1.90837e+06	4.30825e+06	2.30431e+06	5.71453e+06	2.72326e+06	521650	3.43894e+06	736316	1.75765e+06	1.04609e+06	839173	188154	2.51467e+06	1.05154e+06	715250	1.11713e+06	3.17309e+06	2.57629e+06	3.82012e+06	721944	2.7374e+06	819304	155126	4.37458e+06	276436	1.02175e+06	3.28956e+06	280437	1.4613e+06	529317	3.01893e+06	810012
M162T181	[M+H]+	2-aminoadipic acid	0.280574	1.22364	0.334439	162.054	180.583	0.260332	HMDB0000510	C00956	Organic acids and derivatives	Carboxylic acids and derivatives	Amino acids, peptides, and analogues	195.114	5	8	23958.1	19354.3	15458.6	34425.1	16344.9	22010.6	26528.1	34146.2	24580.5	35619.4	25294.9	27378.7	34075	42069.1	30871.3	51790.6	18474.1	28295.9	44648	43658.7	36647.5	20221.8	37053.9	37472.5	20863.2	45665.5	36330.9	25184.9	22905.6	31090.9	21380.7	34936.9	31923.1
M397T244	[M+H+H2O]+	2-arachidonoylglycerol	0.553047	0.989642	0.935201	397.304	243.955	1.17796	HMDB0004666	C13856				249.011	9	7	202801	224867	134753	147871	316168	186455	154212	147933	166434	164533	121918	226837	188846	165218	253303	155205	192746	170355	151293	214241	150494	190444	146217	136616	246380	259906	185074	110660	180070	169870	215275	197801	149518
M271T263	[M+H]+	2-butenamide, 2-cyano-3-hydroxy-n-[4-(trifluoromethyl)phenyl]-, (2z)-	0.242743	1.22203	0.327331	271.056	262.661	3.19124			Benzenoids	Benzene and substituted derivatives	Trifluoromethylbenzenes	277.61	9	10	4351.53	7901.99	16283.1	17596.2	1093.28	21360.4	23721.4	17043.8	10840.8	18237.4	21396.3	19216.1	17174.7	12697.4	17063.3	24307.9	32313.9	25133.1	13115.8	12755.4	29608.5	15299.2	29147.2	44744.6	16505.3	17539.4	7565.05	18695.5	39368.1	14212.2	55760.4	20195.8	22942.5
M151T80	[M+H]+	2-butyl-3-methylpyrazine	0.567455	1.47982	0.417128	151.147	79.791	3.88172			Organoheterocyclic compounds	Diazines	Pyrazines	92.067	8	6	104162	14746.7	17212.8	5037.84	16369.1	96116.4	11959.9	77059.2	6042.91	13950.1	9302.46	44535.5	28268.2	54862.6	9445.7	41375.8	8886.53	4405.37	2755.08	6471.67	46437.7	12939.9	3733.04	5824.75	41807.8	42402.4	33555.9	4122.71	37714.6	5535.57	3343.8	4429.72	3632.09
M106T344	[M+H-C3H8]+	2-butylaniline	0.0798711	1.00001	0.999969	106.049	344.101	1.85798			Benzenoids	Benzene and substituted derivatives	Aniline and substituted anilines	345.986	9	9	390.501	2761.1	3903.05	5785.91	2896.79	3188.03	2248.25	7709.69	6189.99	4715.79	4762.46	1668.45	2263.77	13292.7	4320.76	3627.84	4872.53	3768.19	2622.89	8586.86	5573.88	6028	2520.64	6639.44	2369.1	3288.89	833.724	3660.61	3324.61	3007.93	2634.12	2895.2	2294.87
M253T179	[M+H]+	2'-deoxyinosine	0.339435	0.621874	0.358808	253.092	179.309	2.82444	HMDB0000071	C05512	Nucleosides, nucleotides, and analogues	Purine nucleosides	Purine 2'-deoxyribonucleosides	187.103	10	8	7510.43	7646.36	10290.3	29315.7	72248.6	32192.1	9050.21	25505.5	9318.48	25233.4	28538.3	4245.51	15884.6	30392.7	118445	18382.5	19462.6	18587.8	11122.2	72689.4	22334.9	9561.32	35993	8342.98	12911.8	14319.2	13729.2	9473.6	9625.33	6462.62	21632.7	17178.7	9928.93
M180T143	[M+H]+	2-dimethylamino-6-hydroxypurine	0.705605	1.02518	0.960324	180.087	142.631	1.42357			Organoheterocyclic compounds	Imidazopyrimidines	Purines and purine derivatives	160.877	10	7	213620	19303.2	157177	35970.9	68399.3	11598.9	49388.4	8067.48	11397.1	32817.2	23514.4	31984.8	6502.71	15354	94315.6	14226.7	12360.5	18909.6	14283.2	39940.3	14724.7	12582	15715.7	12093.9	19427.3	9623.48	26635.6	14754.3	7081.09	11736.1	15029.3	21336.4	19123.9
M113T125	[M+H]+	(2e,4e)-hexa-2,4-dienoic acid	0.984745	0.929483	0.746044	113.07	124.989	5.87109	HMDB0029581		Lipids and lipid-like molecules	Fatty Acyls	Fatty acids and conjugates	132.788	10	10	190939	120618	550947	204373	403713	187024	240967	209565	94717.4	232099	329092	217053	120852	369888	425165	228357	212346	240575	116375	334117	190279	167829	152831	135659	304089	75814.7	254490	163571	140794	222411	299946	303366	185623
M512T179_2	[M+Na]+	(2e,6e,11e,13e)-18-(2,6-dioxopiperidin-4-yl)-9-hydroxy-8-methoxy-10,12,14-trimethyl-15-oxooctadeca-2,6,11,13-tetraenoic acid	0.264765	1.19904	0.18867	512.271	178.994	1.38685			Lipids and lipid-like molecules	Fatty Acyls	Lineolic acids and derivatives	187.245	9	9	7879.03	11411.1	14091.5	29063.6	14380.3	26174.6	14249.4	22605.1	19895.4	21471.1	18957.3	13474.2	10559.8	20087.2	22957.9	19049.9	26789	29362.4	12771.7	16079.8	22021.5	17660.9	28440	25459.4	13257.9	15490.8	12757.9	13026.8	18376.6	19940.7	17169.2	14240.3	20989.2
M162T65_2	[M+H-C7H14]+	2-heptyl-4-hydroxyquinoline n-oxide	4.51205	0.700545	0.360675	162.054	64.762	5.93547		C04284	Organoheterocyclic compounds	Quinolines and derivatives	4-hydroxy-2-alkylquinolines	81.839	10	10	2.02252e+06	1.76448e+06	2.80411e+06	889513	2.22246e+06	1.96975e+06	1.49024e+06	1.6547e+06	4.76276e+06	1.96188e+06	5.88253e+06	444000	1.85934e+06	7.38718e+06	1.05403e+07	596234	2.0438e+06	1.32083e+06	1.61404e+06	6.03388e+06	1.01505e+06	1.98602e+06	2.09626e+06	790370	1.56046e+06	1.82986e+06	281087	1.11884e+06	499629	1.38169e+06	1.12995e+06	1.39106e+06	1.38742e+06
M579T350	[M+Na]+	2-hydroxyatorvastatin lactone	0.0893609	1.12927	0.585944	579.235	349.579	0.462165			Organoheterocyclic compounds	Pyrroles	Substituted pyrroles	351.632	8	4	2730.21	4798.09	4995.44	7922.41	6334.1	7836.13	4050.81	6998.48	8524.97	5682.51	4264.22	5777.75	3227.73	5183.25	6413.85	4593.06	6069.72	5173.58	3876.79	5977.79	7600.13	7953.24	5155.92	5090.32	7253.23	3173.3	4899.47	6975.93	5619.09	4964.68	6903.84	6731.37	3912.51
M198T350	[M+H]+	2-hydroxyatrazine	0.317435	1.08426	0.606633	198.148	350.223	3.18009	HMDB0062766	C06552	Organoheterocyclic compounds	Triazines	1,3,5-triazines	352.148	10	7	12689	26036.1	59723.9	26450.7	36474.1	44225.2	19913.1	30011.3	30436.2	40487.2	35411.7	12620.8	17207.5	33443.8	39360.9	21666	52739.7	26024.3	20619	19092.5	44486.7	16737.1	33380.8	26482.4	6827.81	16807.8	41369.9	46514.9	20066.2	31096.5	24328.7	20736.3	37840.3
M107T259	[M+H-H2O]+	2-hydroxybenzyl alcohol	0.23945	0.930578	0.783858	107.048	259.428	1.34028	HMDB0059709	C02323	Benzenoids	Benzene and substituted derivatives	Benzyl alcohols	278.385	7	9	6030.38	31562	54981.4	20059.5	68555.8	40144.3	9540.39	46348.8	15350.1	18120.5	19694.1	15099.9	4856.63	39435.4	17537.9	9113.38	19436.7	45854.9	38235.8	39163.3	14717	40180.7	13161.1	4303.47	50802.7	5392.46	17151.9	41440.3	6839.11	23586.6	14428.1	43390.1	16176.8
M100T253	[M+H-C14H13NO]+	2-hydroxytrimipramine	0.89517	0.842392	0.204908	100.111	252.594	0.715522			Organoheterocyclic compounds	Benzazepines	Dibenzazepines	254.79	10	10	49196	34391.1	42843.3	60286.7	51592.1	76779.7	59472.3	58450.6	76084.5	88388.9	97747	43340.9	70004.9	86954.8	104857	63845.6	83396.5	79486.7	71745.3	70859.6	85364.6	54956.5	85320	73345.5	56120.2	57367	46416.5	51956.4	50809.9	57297.5	83643.2	60457.7	57577.3
M113T232	[M+H]+	2-imino-4-methylpiperidine	0.394378	0.952285	0.798542	113.106	232.187	2.18509			Organoheterocyclic compounds	Pyridines and derivatives	Hydropyridines	234.706	10	10	13462.5	5746.61	10817.9	32027.5	9285.83	28009.9	17084.5	24240.9	31467.3	23232.7	29182.1	12240.2	11720.6	18063.7	21934.8	13255.5	20427.3	21122.5	14170.3	15665.2	25037.1	16423.5	15748.3	11137	12867.9	6593.11	10123.8	27315.9	13888.1	17112.6	15343.1	21705.9	16689
M337T34_1	[M+H-H2O]+	2-linoleoylglycerol	1.64327	0.955591	0.767566	337.272	34.168	3.46386	HMDB0011538		Lipids and lipid-like molecules	Fatty Acyls	Lineolic acids and derivatives	36.637	10	10	427160	145951	276103	482538	286327	368533	524610	355572	311773	520494	549385	393920	258067	550790	281339	386937	398060	593528	537210	491076	410048	451615	456717	427495	803274	228506	754125	530967	273096	567304	376436	394278	485205
M69T279	[M+H-H2O]+	2-methyl-3-buten-2-ol	0.348078	0.915202	0.797721	69.0693	278.531	1.54849	HMDB0033854	C21402	Organic oxygen compounds	Organooxygen compounds	Alcohols and polyols	288.613	10	10	1301.55	30055.2	49643.2	15013.4	77095.7	29876.3	2003.12	34392.7	12034.8	19539.5	8751.84	9109.46	1877.24	31451.9	16739.2	9954.93	11593.7	34199.7	22705.6	41366.7	8629.05	27407.1	8990.78	986.503	53121.3	2709.02	12296.3	29236.4	1572	16422.8	3092.43	31315.5	9414.83
M343T446	[M+K]+	2-methylene-5-(2,5-dioxotetrahydrofuran-3-yl)-6-oxo--10,10-dimethylbicyclo[7: 2: 0]undecane	0.657124	2.24471	0.211321	343.123	445.89	3.33374			Organic acids and derivatives	Carboxylic acids and derivatives	Dicarboxylic acids and derivatives	463.656	9	3	15216.5	7594.43	7892.04	107049	10733.3	16318.5	10678.6	23097.3	4970.5	13428.8	13987	12450.8	4092.45	14684.8	12311.5	600007	15654.9	38033.1	9760.15	47383.4	12059	7211.83	13985.1	11665	28527.1	7189.83	5598.7	29776.1	8184.58	19668.6	13839.9	6287.86	10351.4
M86T313	[M+H]+	2-methylpyrrolidine	0.75505	0.888474	0.70005	86.0956	312.963	6.92878		C10820				316.605	7	8	24627.5	56702.1	57598.6	63330.9	67064.8	202419	27899.5	82840.1	24673	59617.3	54649.8	50851.4	15663.8	61470.6	140325	54880	70687.5	70514	71267.1	275855	39752.5	68500.5	63337	33880.5	60956.4	21469.5	61952.9	85649.2	33123.3	58095.9	31980.6	122621	48029.4
M463T40	[M+H]+	2-naphthalenecarboxamide, n-[(1s)-2-[4-(5-chloro-2,3-dihydro-2-oxo-1h-benzimidazol-1-yl)-1-piperidinyl]-1-methylethyl]-	1.23095	0.715363	0.235981	463.182	40.297	3.7137			Benzenoids	Naphthalenes	Naphthalenecarboxylic acids and derivatives	41.121	8	9	26911.1	49977.3	125570	132673	150883	88172.9	185344	63260.5	45448.4	153511	142403	222962	30567.4	241358	34510.6	188348	131622	239576	88714.3	47306.9	572365	282097	136632	82241.3	164416	148009	286674	97300.6	235280	64837.4	59860.2	282759	150875
M277T372	[M+H]+	2-naphthalenol, 1-[(2,4-dimethylphenyl)azo]-	0.564109	0.765972	0.0141796	277.127	371.85	7.08543		C19526	Benzenoids	Naphthalenes	Naphthols and derivatives	391.241	10	8	16038.9	16239.6	20064.3	14475	21732.9	7089.71	13951.8	15951	19937.4	15752.1	19700.2	13050.3	29897.8	22992.1	16753	19525.3	20566.4	20128.5	15420.4	13964.3	15175.7	15525.2	20432.7	21211.5	19513.5	16572.1	35534.6	6989.78	4091.97	20171.3	24040.9	23570.5	13424.3
M783T147	[M+Na]+	2-oleoyl-1-palmitoyl-sn-glycero-3-phosphocholine	3.25232	1.06318	0.803975	782.567	146.959	0.883803	HMDB0007972		Lipids and lipid-like molecules	Glycerophospholipids	Glycerophosphocholines	155.124	10	10	2.19854e+06	1.32847e+06	2.84355e+06	3.60531e+06	1.36074e+06	1.413e+06	1.78853e+06	1.35839e+06	252812	2.80793e+06	1.86181e+06	2.04461e+06	2.03277e+06	2.27168e+06	709383	1.41833e+06	3.25477e+06	4.80102e+06	1.50523e+06	1.46816e+06	2.02088e+06	1.87453e+06	539949	2.17277e+06	9.45412e+06	1.42971e+06	3.85715e+06	2.59872e+06	952440	2.23801e+06	856164	1.86691e+06	2.55616e+06
M258T176	[M+H]+	2'-o-methylcytidine	0.437287	0.996951	0.991741	258.108	176.453	1.78731						190.814	5	5	52693.8	12496.9	24267.8	30072.3	25138.3	41074.5	41102.7	66297.8	24385	27811.6	45249.1	29375.8	34669.6	37405.4	119171	28698.2	54328.1	40465.2	35111	56826.5	46043.3	32213.1	38363.8	38117.5	28179.9	36983.6	13079	39778.9	32885.7	32113.6	50340.7	29505.8	35587.3
M219T185	[M+H]+	2-phenylpiperidine-2-acetamide	0.415426	1.36516	0.208357	219.148	184.642	3.46587			Organic acids and derivatives	Carboxylic acids and derivatives	Amino acids, peptides, and analogues	194.842	5	8	48946.5	55149.9	2879.09	46520.3	4048.87	27273.7	9561.6	52296.6	53443.3	6531.71	24621.9	94769.7	12836.1	29165.9	26735.1	11756.5	30888.8	41032.7	69529.6	28298.5	44571.1	58198.5	50688.9	19666.3	24623.8	11867.6	41858.6	20304.6	15016.4	7579.02	43146.3	22277.7	32053.3
M100T57_2	[M+H]+	2-piperidone	1.70687	0.904948	0.780195	100.075	56.9665	6.08954	HMDB0011749	C10482	Organoheterocyclic compounds	Piperidines	Piperidinones	65.366	10	10	1.66207e+06	456040	1.55721e+06	486215	1.34838e+06	387155	506150	403055	1.17942e+06	451208	547721	722793	246078	690933	603019	497258	382394	642260	374868	464388	347521	295144	381854	262522	313307	176808	914309	377663	297611	428154	225744	496657	465084
M120T138	[M+H-H2O]+	2-pyridylamidoxime	0.372046	0.894709	0.502617	120.055	137.895	6.83023						144.878	10	10	18238.4	3892.14	15814.1	20820.5	6957.51	22276.9	18321.4	6386.96	17478.5	23177.8	16315.4	11434	16302.8	18297.1	23894.5	18313.4	17340	20393.6	12132.9	14382.6	13729.9	9615.86	12481.4	15655.2	8468.25	8735.96	9420.5	14057.9	13780.7	12194.7	10329	13569.1	18770
M284T191	[M+Na]+	(2r)-3-hydroxyisovaleroylcarnitine	0.259729	1.13811	0.518884	284.148	190.86	2.29156			Lipids and lipid-like molecules	Fatty Acyls	Fatty acid esters	209.817	9	5	21119.1	7388.13	11283.4	24992.7	8802.23	25533.9	19733.4	13008.7	14689.2	14257.8	20493.3	7981.63	12063.3	9605.42	24682.7	17324.6	27743.1	14156.1	19243	22296.5	23721.5	13577.8	27281.9	17119.4	30404.1	15351.3	3800.89	46729.7	16463.7	32172.4	16391.9	23355.2	33082.2
M703T217_1	[M+Na]+	(2r,3r,4r,6ar,6bs,8as,11r,12r,12as,14br)-2,3,12-trihydroxy-4,6a,6b,11,12,14b-hexamethyl-8a-[(2s,3r,4s,5s,6r)-3,4,5-trihydroxy-6-(hydroxymethyl)oxan-2-yl]oxycarbonyl-1,2,3,4a,5,6,7,8,9,10,11,12a,14,14a-tetradecahydropicene-4-carboxylic acid	0.77094	1.36958	0.181193	703.382	216.616	1.8073			Lipids and lipid-like molecules	Prenol lipids	Terpene glycosides	218.174	9	10	17943	22341.6	18942.7	52266.6	21121.9	81286.1	36701.7	67805.9	7662.72	44165.4	44302.9	31762.7	16925.4	35905.8	37703.8	48579.3	55460	58450.7	30818.7	55027.7	66312	47045	51671.3	61257.3	51745.5	22635.7	26655.2	88176.2	32100.8	51576.2	29159.2	27505.7	60654.2
M687T370	[M+Na]+	[(2r,3r,4s,5s,6r)-3-acetyloxy-2-(acetyloxymethyl)-5-butanoyloxy-6-[(2s,3r)-2,3,4-trihydroxybutoxy]oxan-4-yl] 14-hydroxytetradecanoate	0.200801	0.996495	0.98171	687.336	370.082	4.0333						385.189	10	7	2926.02	5159.37	3342.44	7922.42	5281.42	9567.38	6802.66	13995.5	7821.1	11412.7	9346.78	7369.45	10325	8416.64	9927.81	8711.21	12528.1	9243.49	8174.12	4846.11	11167.7	9244.85	5618.01	11742.8	7533.14	7454.77	3885.4	6383.82	10482.8	7047.19	8479.17	8183.69	10567
M439T429	[M+Na]+	(2r,3s,4s,5r,6r)-5-[(2s,3r,4r)-3,4-dihydroxy-4-(hydroxymethyl)oxolan-2-yl]oxy-2-(hydroxymethyl)-6-(2-phenylethoxy)oxane-3,4-diol	1.15239	1.34409	0.316672	439.141	429.389	1.66552			Organic oxygen compounds	Organooxygen compounds	Carbohydrates and carbohydrate conjugates	443.219	10	9	74475.1	107476	37908.7	98677.5	222143	148432	110451	204229	22498.5	80409.6	76482.6	81341.4	20957.6	156957	80133.3	2.41216e+06	95391.7	80366	52527	73936.1	86309.5	80606.9	143710	59786.9	51702.5	19094.4	61913.9	91203.8	51560.8	69230.5	30051.9	63686.1	127361
M689T256	[M+Na]+	[(2r,3s,4s,5r,6r)-6-[1,7-bis(4-hydroxyphenyl)-5-oxoheptan-3-yl]oxy-3,4,5-trihydroxyoxan-2-yl]methyl (e)-3-(3,4-dimethoxyphenyl)prop-2-enoate	0.134502	1.27888	0.28342	689.277	255.835	3.27525			Phenylpropanoids and polyketides	Diarylheptanoids	Linear diarylheptanoids	276.732	8	7	5241.31	5008.91	7280.59	13200.1	7794.01	5413.11	9001.39	6580.53	4804.13	9658.44	6978.11	14750.4	9672.15	8855.58	7541.87	8716.06	22431.5	6136	8101.3	13364.4	19585	27738.9	5636.9	6572.83	16001.8	12588	5098.22	7673.4	8231.99	12419.5	5830.97	10933.5	7889.06
M749T387	[M+Na]+	(2r,3s,4s,5r,6r)-6-[1,7-bis(4-hydroxyphenyl)heptan-3-yloxy]-5-[(2s,3r,4r)-3,4-dihydroxy-4-(hydroxymethyl)oxolan-2-yl]oxy-2-[[(2s,3r,4r)-3,4-dihydroxy-4-(hydroxymethyl)oxolan-2-yl]oxymethyl]oxane-3,4-diol	0.17293	0.886006	0.63177	749.288	387.34	0.396558			Phenylpropanoids and polyketides	Diarylheptanoids	Linear diarylheptanoids	389.407	10	9	3323.16	4485.61	10056.3	7451.95	6126.53	11371.6	4129.89	6279.26	7242.75	6966.37	4992.56	4711.83	1184.37	6808.9	6581.98	4030.81	5355.1	7570.1	5166.64	7935.46	4299.89	7175.39	3647.33	2046.21	24015.6	3303.57	4227.49	9433.92	2458.65	5979.49	5004.63	16318.7	4065.79
M721T533	[2M+H]+	2-thiophenecarboxamide, 3-[(aminocarbonyl)amino]-5-[4-(4-morpholinylmethyl)phenyl]-	0.249067	1.76792	0.204089	721.257	533.028	2.74242			Organoheterocyclic compounds	Thiophenes	Thiophene carboxylic acids and derivatives	545.579	7	2	1431.33	795.951	877.491	16877.6	2808.96	10221.1	2824.86	10810.8	3148.14	4263.57	4171.14	1619.94	1997.7	4005.08	5806.32	6269.69	9917.35	10480	4896.23	8474.76	3388.2	2295.71	4668.63	8845.5	2622.44	1886.67	1039.93	19909.5	5450.19	4926.29	4580.12	2831.91	2108.3
M795T112	[M+Na]+	3-(1h-indol-3-ylmethyl)-6,18-dimethyl-12-(1-phenylethyl)-9,15-di(propan-2-yl)-1,4,7,10,13,16,19-heptazacyclotricosane-2,5,8,11,14,17,20-heptone	0.144693	1.07204	0.711787	795.432	111.839	2.30151			Organic acids and derivatives	Peptidomimetics	Hybrid peptides	117.41	6	6	5294.64	9171.72	5852.27	17379.9	6000.74	18130.5	6688.61	12063.8	8656.83	10690.9	8321.21	10446.7	20748.3	11941.8	14868.7	16586.5	17834.3	12442.9	14912.7	23088.7	9629.65	7233.42	11301.1	31144.9	9231.7	17895.1	5390.7	9218.65	4385.13	11068.3	14369.3	8721.1	10725.2
M793T255	[M+Na]+	3-[(2s,3r,4s,5s,6r)-4,5-dihydroxy-3-[(2r,3r,4r,5r,6s)-3,4,5-trihydroxy-6-methyloxan-2-yl]oxy-6-[[(2r,3r,4r,5r,6s)-3,4,5-trihydroxy-6-methyloxan-2-yl]oxymethyl]oxan-2-yl]oxy-5,7-dihydroxy-2-(4-hydroxyphenyl)-6-methoxychromen-4-one	0.399682	1.92632	0.12716	793.227	254.697	2.32498			Phenylpropanoids and polyketides	Flavonoids	Flavonoid glycosides	257.16	10	9	2524.06	2720.68	11862.3	22881.6	5159.36	3055.24	3745.24	11084.7	1458.08	5239.05	4342.63	2450.67	3039.41	4252.65	4696.75	5790.66	10410.9	9371.43	6002.83	8610.91	3855.97	3774.56	2732.86	2422.7	6112.81	2099.79	3531.65	8517.99	2584	4544.63	2923.23	6117.18	3639.13
M227T261	[M+H]+	3,3'-dimethyl-4,4'-diaminodiphenylmethane	0.654725	0.953224	0.770901	227.138	261.294	2.3146		C19260	Benzenoids	Benzene and substituted derivatives	Diphenylmethanes	265.439	10	9	231554	28061.2	75918.5	127485	59135.3	123128	128045	128613	43163.9	127697	146875	89406.1	130466	111881	176380	114104	162121	102691	112726	76070.6	126656	70790.5	140303	145318	32744.9	118654	43949.9	104878	114762	68595.7	152854	75662.1	95234
M513T437	[M+Na]+	3',4',6-trimethoxyisoflavone-7-o-.beta.-d-glucopyranoside	0.67084	2.23412	0.0430398	513.12	436.556	2.67675			Phenylpropanoids and polyketides	Isoflavonoids	Isoflavonoid O-glycosides	451.145	7	6	62078.6	4124.49	9331.66	23952.4	6166.67	33248.5	8528.96	15410.4	4410.29	28128.9	17004.3	12031.5	3923.98	7515.36	16450.9	47805.5	11950.7	6106.76	15315.8	30104.1	22792.4	3731.14	17443.5	11012.7	42950.8	3158.83	11508.3	56588.4	4786.79	35442.3	4928.87	5615.85	20678.1
M179T303	[M+H]+	3,4-methylenedioxyphenylacetone	0.402903	1.28961	0.190494	179.08	303.264	6.24671						307.062	9	5	22801.9	20292.9	20483.2	30321.6	18363.5	45674.3	19952.4	52740.4	19840.1	62543.7	38629.8	150439	18258.4	28703.9	15539.1	32179.2	44985.4	43142.6	40514.7	39025.3	39206.7	98749.4	30659.1	55919.9	21393.8	19046.3	28105.5	66424.6	33820.7	45711.1	18874.8	27375	36986.6
M314T223	[M+H]+	3',5'-cyclic damp	0.17557	1.13713	0.568823	314.091	223.122	3.48486			Organoheterocyclic compounds	Imidazopyrimidines	Purines and purine derivatives	227.729	10	8	8336.99	5093.74	6778.33	7044.7	7031.69	15493	6787.78	15486.3	9127.74	7464.74	19305	15863.1	4959.83	12012.2	20965.9	10238.5	12821.9	15431.1	10903.4	15338.2	12266.5	6154.61	11918.9	14122.8	6576.42	5257.83	782.246	7390.12	6715.2	5107.34	13333.2	6298.66	7447.12
M793T494	[M+K]+	3-[6-[[(2r,3r,4r,5s,6s)-3,5-dihydroxy-6-methyl-4-[(2s,3r,4r,5r,6s)-3,4,5-trihydroxy-6-methyloxan-2-yl]oxyoxan-2-yl]oxymethyl]-3,4,5-trihydroxyoxan-2-yl]oxy-5-hydroxy-2-(4-hydroxyphenyl)-7-methoxychromen-4-one	0.24623	1.41195	0.117579	793.183	493.914	3.64653			Phenylpropanoids and polyketides	Flavonoids	Flavonoid glycosides	502.827	9	6	3296.02	1985.09	4311.66	6431.61	2661.24	5316.9	1693.83	5993.11	1277.53	5999.93	4882.21	5001.58	998.454	3805.35	4178.27	46746.1	6970.22	7392.35	1645.02	8512.02	2243.67	1715.78	6732.96	3188.86	13368	1345.62	2107.56	11944.1	1414.57	3328.35	3330.23	2676.1	3287.23
M391T278	[M-H2O+H]+	3alpha,7beta,12alpha-trihydroxy-5beta-cholan-24-oic acid	1.65955	0.656376	0.187998	391.282	277.535	4.22935	HMDB0000917	C17644	Lipids and lipid-like molecules	Steroids and steroid derivatives	Bile acids, alcohols and derivatives	293.671	7	8	21811.4	133148	33719.6	89959.9	92048.3	36774	135395	16868.9	154638	150431	93297.6	276848	215962	23751.9	26955.7	86611.7	21187.3	16577.6	171534	21602.8	91956.4	148974	18287.3	31129.9	17606.7	90124.1	18256.1	57127	44338	174946	193954	145181	23678
M707T389	[2M+Na]+	3.alpha.-galactobiose	0.878687	1.52242	0.433234	707.219	389.389	0.103533			Organic oxygen compounds	Organooxygen compounds	Carbohydrates and carbohydrate conjugates	398.661	10	6	18445.5	2651.99	3215.55	138006	3084.26	102987	17686.1	106731	3297.89	239434	10401	62949	2062.24	52286.8	41282.2	70706.6	29774.5	216690	7725.27	481416	34334.8	3316.7	122166	40046	50522.8	3313.51	2977.43	85910	20625.8	74439.5	26033.2	3756.43	30723.7
M95T402	[M+H]+	3-aminopyridine	2.1021	1.09553	0.812496	95.0596	401.902	5.0847			Organoheterocyclic compounds	Pyridines and derivatives	Aminopyridines and derivatives	418.817	9	10	50824.2	60148	49054.5	353504	34563.5	759446	452575	347831	59514.1	400301	617837	113685	119248	448336	511954	226274	710221	386544	374613	261073	444898	302193	491894	278190	289555	177213	106890	201898	129015	398845	537078	330161	380161
M145T67	[M+H]+	3-aminoquinoline	0.230434	1.01698	0.930684	145.075	66.8705	0.702385			Organoheterocyclic compounds	Quinolines and derivatives	Aminoquinolines and derivatives	79.725	5	6	36052.8	64182.7	85541.4	89059.7	102333	59513.2	39506.2	103004	34590.2	31168	64818.2	46944.1	35079	26608.8	58398.6	46255.1	61132	14579.5	86458.6	12162.1	38238	71406.3	50278.9	41920.1	133881	25329.5	28621.2	101098	6380.73	66328.4	27453.5	110542	19491.4
M393T149	[M+H-H2O]+	(3.beta.,5.alpha.)-4,4-dimethylcholesta-8,14,24-trien-3-ol	0.487315	1.21978	0.493484	393.347	149.462	4.71733	HMDB0001023	C11455	Lipids and lipid-like molecules	Steroids and steroid derivatives	Cholestane steroids	159.056	8	8	6046.45	51334	16271.9	21399.5	39078.5	21192.4	11132.1	10907.6	15289.5	45192.6	11151.2	11591.4	19282.5	11138	12965.3	10776.4	6762.62	33980.5	8885.12	28240	12988.9	21866.7	7732.84	27459	5447.6	9992.52	12489.3	28977.2	9280.99	9685.29	10278.4	41310.7	22595.3
M433T189	[M+H-H2O]+	3.beta.-tetrahydrocortisol, 3,21-diacetate	0.656042	0.836541	0.119525	433.276	188.907	5.66392			Lipids and lipid-like molecules	Steroids and steroid derivatives	Steroid esters	196.671	5	7	37298.7	49681.9	23111.5	36565.9	51650.1	31104.4	35806.6	42956.8	58578.3	33809.3	40889.8	44486.9	38405	41965.5	48003.3	33909.4	19911.1	31841	22043.5	47257.6	25222.1	32153.2	51537.2	33729.2	39667	41462.4	38176.8	27264.9	37194.7	27987.8	53089.3	50404.8	29209.3
M448T287	[M+H-C5H13SO3N]+	3-[(cholamidopropyl)dimethylammonio]-1-propanesulfonate	0.353016	1.09651	0.759749	448.34	287.393	1.06101		C11321	Lipids and lipid-like molecules	Steroids and steroid derivatives	Bile acids, alcohols and derivatives	291.987	7	7	18421.1	14234.4	16742.4	3861.63	15318.5	1085.15	2014.61	8604.85	7683.51	10552.9	9132.55	8310.52	5957.92	3103.41	8789.8	8028.11	1443.65	4254.28	2707.31	11490.4	2028.49	7452.33	8665.1	8294.64	13293.7	8346.15	14211.4	6597.73	1702.88	5465.13	2892.78	5615.62	1313.04
M555T329	[M+H]+	3-deacetylsalannin	1.4299	0.87386	0.655139	555.315	328.857	1.40986			Lipids and lipid-like molecules	Prenol lipids	Triterpenoids	340.624	10	10	10040.3	122729	7367.66	88256.2	7769.25	104693	54477.4	135021	222301	123276	42340.5	80045.6	130332	35670.8	46238.5	74981.6	130736	134559	145918	27454.2	79749.3	91505.9	44844.6	115826	22633.5	115354	16901	63598.9	124493	88726.2	165133	110182	82488.6
M116T209_2	[M+H-CO2]+	3-dehydrocarnitine	0.720224	1.03558	0.901059	116.106	209.057	4.83218	HMDB0012154	C02636	Organic acids and derivatives	Keto acids and derivatives	Short-chain keto acids and derivatives	211.623	10	10	532986	48952.9	255181	81640.5	99405.9	64338	121156	76488.1	61246.4	105565	80228.5	110311	58584.7	82655.1	271749	79845.1	97974.6	77309.4	113783	119315	74540.2	61036.9	114870	90929.6	62430	95902.6	73268.1	78443	85859	72211.7	82379	68769	67945.4
M237T302	[M+H-H2O]+	3-furancarboxylic acid, tetrahydro-4-methylene-2-octyl-5-oxo-, (2r,3s)-rel-	0.442155	0.837757	0.456868	237.159	302.024	2.84603			Organoheterocyclic compounds	Lactones	Gamma butyrolactones	308.79	9	8	37710.5	15915.1	16627.5	53759.5	18648.6	34504.8	70535.5	60456.9	24350.6	68657.8	82838.3	49634.3	79947.2	27882.5	86126.2	68302.2	66840.4	50163.6	53290.1	27400.5	68944.4	34392.2	43397.1	84485.1	26124.3	64197.5	19073	43941.2	70347.1	33231.9	88163.7	38555.1	55820.9
M509T399	[M+Na-H2O]+	3'-galactosyllactose	0.285844	1.24201	0.363044	509.145	399.463	0.169785	HMDB0006599		Organic oxygen compounds	Organooxygen compounds	Carbohydrates and carbohydrate conjugates	410.377	8	8	18607.1	18497.3	15318.4	38571.2	17169.5	24768.7	18141.9	57861.2	39776.1	43900.7	22520	29037.7	27203.4	13581.1	18723.3	47040.3	13433.2	30077.2	20457.3	34572.6	33940.2	20334.2	12724.5	21621.9	15622.3	21687.9	109171	20481.7	26196.2	24289.6	26852.7	17928.1	15843.2
M126T105	[M+H-C2H2O]+	3-hydroxyacetaminophen	0.296295	1.04372	0.740685	126.054	104.556	3.09822			Benzenoids	Benzene and substituted derivatives	Anilides	109.899	9	7	96954.4	50555.6	73512.1	72149.6	61205.1	76878.5	56658.6	74551.6	51541.9	53788.3	82009.5	73509.9	50406	92866.3	75049.1	79541.1	66805.8	65701.5	59414.8	84484.7	56503	54320.4	48298.7	58111.3	68389.5	41476.6	77681.8	54998	7770.22	53020.8	31378.4	72793.4	48326.3
M248T320	[M+H]+	3-hydroxybutyrylcarnitine	0.346966	0.994164	0.980951	248.148	320.031	2.33731	HMDB0062735		Lipids and lipid-like molecules	Fatty Acyls	Fatty acid esters	321.307	9	8	6988.97	27846.6	9223.38	27690.6	16004.5	24014.5	13615.6	24733.8	17508.7	64741.8	10873.2	27638.3	23071.1	14177.2	16851.6	34592.1	37469.8	42108.9	33096.7	15126.7	15626.8	54211.6	21408.9	38825.8	12348.3	29598	13456.7	35238.3	36638.1	26091.2	44662.4	35035.8	42124.5
M258T374	[M+H]+	3-hydroxymethylmefenamic acid	0.323838	0.78328	0.221457	258.096	373.865	2.70068			Benzenoids	Benzene and substituted derivatives	Benzoic acids and derivatives	381.693	7	6	22372.3	43037.6	30040.2	29725.5	58816.6	29786.3	12105	16009.2	25896.4	29288.2	34506.8	20816.6	28265.7	26171	13139.8	8161.23	19827.3	16693.6	26269	39700.6	12472.5	31708.3	12844.7	11216	44880.6	21247.7	54761.8	13072.4	9432.4	28969.3	29086	54026.6	25017.1
M274T261	[M+H]+	3-methoxyphencyclidine	0.320326	0.731269	0.22403	274.212	261.325	1.41961			Benzenoids	Phenol ethers	Anisoles	273.233	10	8	1927.8	7457.38	4075.04	12546.8	8330.61	19288.6	4295.52	9789.61	6244.7	13986.1	14175.4	3009.77	1735.38	18790.6	14370.4	4349.06	3567.29	13895	12068	21744.4	13043.3	10777.3	6123.15	5863.33	22516.7	8847.87	8598.09	19220	4550.05	10008.9	6848.22	11527.2	4989.01
M150T246	[M+H]+	3-methyladenine	1.26098	0.828647	0.773501	150.076	245.751	9.41651	HMDB0011600	C00913	Organoheterocyclic compounds	Imidazopyrimidines	Purines and purine derivatives	266.259	10	9	2.32003e+06	92550.9	837916	38240.6	413405	25529.5	249960	41971.4	49808.9	105083	70176.3	56046.8	21889.4	81661.7	740087	36231.9	20359.6	17207.8	19858.5	236332	28842.1	29136.3	120651	20805.6	20805.7	15687.6	165818	21410.5	12567.7	12044.3	12459.8	42176.8	70646.9
M170T156	[M+H]+	3-Methylhistidine	1.31396	1.06081	0.844026	170.091	155.987	0.748057	HMDB0000479	C01152	Organic acids and derivatives	Carboxylic acids and derivatives	Amino acids, peptides, and analogues	168.525	9	10	11679.9	26923	44106.1	141625	14975.2	276394	79268.9	173794	35303.9	101143	212723	105898	104624	155702	288110	178447	222259	138552	134178	75074.4	176133	60786.9	233250	219871	53898.8	81555.2	44643.4	162094	172591	108815	121572	149902	188953
M109T52	[M+H-CH3O2N]+	3-methyl-l-histidine	1.79441	1.25381	0.694539	109.075	51.632	1.38438	HMDB0000479	C01152	Organic acids and derivatives	Carboxylic acids and derivatives	Amino acids, peptides, and analogues	71.766	9	10	150031	137250	553372	49662.5	264094	35991	132487	38181	60160.7	41441.1	56384	126205	42833.5	37129	100525	52691.2	40523	35120.6	113229	124414	16894.2	56338.6	23692.8	43955.7	20493.4	36814.8	260864	35453.4	21522	44769.3	24469.4	60109.8	35854.1
M458T258	[M+Na]+	3-oxazolidinecarboxylic acid, 2,2-dimethyl-4-(1-oxo-2-hexadecyn-1-yl)-, 1,1-dimethylethyl ester, (4s)-	0.288156	0.921973	0.630866	458.345	257.647	6.86979			Organoheterocyclic compounds	Azolidines	Oxazolidines	259.593	10	10	3863.42	10465.2	6745.8	12824.4	6716.76	8899.33	17009.8	13480	11926.2	13294.2	10716.9	27526.6	7746.75	8950.92	10411.7	17909.8	13159.1	9548.09	10913.1	8327.68	16546.4	10171	11544.5	16769.8	11062.4	6098.43	6377.45	11960.9	12962	17195	10084.4	9878.1	8839.58
M533T393	[2M+H]+	3-pyridineacetonitrile, .alpha.-[(3,4-dimethoxyphenyl)methylene]-, (.alpha.z)-	0.201118	1.17295	0.404849	533.195	393.458	1.01996			Benzenoids	Benzene and substituted derivatives	Methoxybenzenes	395.553	10	10	5288.72	5684.67	8591.39	19225.7	5199.5	18776.8	14710	22553.6	15596.9	17800.2	24603.6	13220.6	7284.34	13364.3	15310	6452.14	20916.7	18739.6	8388.24	16320.1	12245.4	9385.24	7434.76	14766.9	8171.86	7661.27	5361.75	13459.9	19497.3	7454.51	7290.24	11521.2	10234.3
M161T68	[M+H-H2O]+	3-trans-hydroxynorcotinine	0.188963	0.813216	0.569609	161.07	68.482	3.19597			Organoheterocyclic compounds	Pyridines and derivatives	Pyrrolidinylpyridines	72.078	10	7	207449	41122	120837	50473.2	86614.6	19129.4	70251	203489	50916.4	31874.9	31687.9	33286.8	18827.6	127119	69188.1	20434	13699.5	10398.3	18986.5	53743.7	9684.07	20219.7	21431.5	94210.7	19679.7	7174.63	99884.5	18140.1	18233.6	17134.3	14407.9	28823.1	25344.4
M159T259	[M+H-C2H5N]+	4-(1-piperazinyl)-1h-indole	0.210691	0.936859	0.794502	159.091	258.632	0.197061			Organoheterocyclic compounds	Diazinanes	Piperazines	268.014	10	9	6292.9	28173.1	40539.2	29679.2	46549.1	33995.3	8159.62	47642.5	6507.72	22347.2	19838.6	17731.2	5278.15	24694.8	14725.7	20889.3	13862.6	42152.9	39546.7	19353.7	24229.7	46454.6	6834	7032.66	54476.2	6410.52	25849	68627.4	5416.22	41012.1	4264.92	52308.6	13921.5
M531T157	[M+H]+	4-(2-oxo-1,2,3,4-tetrahydroquinolin-6-yl)oxycilostazol	0.294147	0.941183	0.767014	531.267	156.873	0.0424362			Organoheterocyclic compounds	Quinolines and derivatives	Quinolones and derivatives	165.804	10	10	24760.3	32724.9	21735.7	35095.1	30337.8	40709	31375.5	47613.4	10380.1	48537.7	51982.9	48691.7	79800.3	47200.3	25242.8	35346.4	47986.6	40599.3	43346.3	42012.6	48550.4	41891.2	20585.8	40508.3	60791.2	29063.4	26143.1	31776	27197	45469.3	57023.4	31348.6	34716.5
M599T461	[M+Na]+	4-[3,4,5-trihydroxy-6-(hydroxymethyl)oxan-2-yl]oxy-9-(3,4,5-trimethoxyphenyl)-5a,6,8a,9-tetrahydro-5h-[2]benzofuro[6,5-f][1,3]benzodioxol-8-one	1.60289	2.24995	0.126927	599.177	460.87	1.46011						463.206	7	6	13877.1	9496.81	37495.1	303829	39588.3	170236	37562.9	150400	5931.78	73658.6	18425.8	62043.3	5648.43	36748.5	77484.2	43545.7	37864.8	188866	45797.8	139408	107118	14204.1	176026	57500.5	39342.7	9998.69	30877	229058	24004.4	78140.7	27552.7	9922	62104.5
M315T94	[M+Na]+	4-[(3-acetyl-2,6-dihydroxy-5-methylphenyl)methyl]-3-hydroxy-2-methyl-2h-furan-5-one	0.352319	0.934217	0.627171	315.064	93.579	3.08889			Organic oxygen compounds	Organooxygen compounds	Carbonyl compounds	98.601	10	10	8804.37	9107.84	10816.4	22382.3	12371.1	21340.9	15206.9	19709.1	15663	13695.2	20973.3	5913.48	18798.9	26168.3	25848.3	18389.6	20453.7	23895.9	15130.7	19129.2	16892.2	13003.3	14059.4	22891.4	21802.7	19313.2	11349.1	15163.5	18005.4	18799.4	26130.9	17091.8	15497
M395T172	[M+H-H2O]+	4,4-dimethylcholest-8(9),24-dien-3.beta.-ol	0.419781	0.841299	0.396965	395.373	171.705	0.621026		C05108	Lipids and lipid-like molecules	Prenol lipids	Triterpenoids	181.315	10	8	5003.14	2878.73	8470.47	21378.4	12255.9	16432.7	4103.78	17615.4	20231.1	23757	39549.8	25095.7	26305.8	25965.2	33943.8	22260.9	27568.3	13894.1	3214.46	15710.5	24885.3	16538.2	16425	24157.9	12979.3	20047.4	11588.2	22583	25216.7	2284.51	24001.5	2597.43	18839.4
M510T302_1	[M+Na]+	4-[[4-hydroxy-2-(2-methylpropyl)-1-oxo-3,3a-dihydro-2h-imidazo[1,2-a]indol-4-yl]methyl]-1-methyl-2,4-dihydro-1h-pyrazino[2,1-b]quinazoline-3,6-dione	0.318705	0.932827	0.739357	510.199	301.896	0.28094			Organoheterocyclic compounds	Diazanaphthalenes	Benzodiazines	305.502	7	6	7078.18	10532.8	9276.67	12209.7	5917.53	21072.4	8614.02	8292.81	12522.1	11084.2	6327.38	10267.6	9721.53	14667.4	12723.7	11345.7	13296.6	13955.5	8674.31	8715.92	13779.3	12523.5	13772.8	10018.8	7144.33	8785.07	7892	27050.6	21127.3	19953.8	3832.19	24169.6	7906.03
M442T195	[M+NH4]+	4,4'-methylenebis(2,6-di-tert-butylphenol)	0.237129	1.11414	0.602559	442.35	195.078	0.724722		C14287	Benzenoids	Benzene and substituted derivatives	Diphenylmethanes	200.644	10	10	26572	91266.4	25178.4	70609.2	30087.2	50579	85613.1	99565.1	33339.9	94896	100825	109985	61858.1	74538	75306.4	154813	76673	83003.5	69605	70456.9	122790	59680.6	83323.4	134133	89305	57142.1	43541	66204.4	83555.3	83399.4	78793.1	58476.4	60953
M478T200	[M+NH4]+	4-[5-[[4-[5-[acetyl(hydroxy)amino]pentylamino]-4-oxobutanoyl]-hydroxyamino]pentylamino]-4-oxobutanoic acid	1.86236	1.16711	0.554672	478.291	200.115	1.03545			Lipids and lipid-like molecules	Fatty Acyls	Fatty amides	204.662	10	10	273502	196711	326829	546137	199141	415213	425575	525999	76745.9	566332	509741	354561	300124	476606	228670	512616	814750	1.02339e+06	490981	500941	620806	455833	340000	646958	997247	359079	367576	578922	389056	617498	419961	289334	465457
M246T112	[M+H]+	4-acetamidoantipyrin	0.835029	0.914847	0.838626	246.133	111.697	2.44959			Organoheterocyclic compounds	Azoles	Pyrazoles	132.021	8	9	1.32549e+06	157389	893054	322993	83807	236853	286502	266234	214713	325803	157052	106799	108999	413071	472901	203680	276244	232208	155494	114070	136854	61897.2	163454	112696	81821.6	54760.9	356903	298166	49810.1	151518	172785	84166.3	169830
M146T285	[M+H]+	4-acetamidobutanoate	0.263946	1.04269	0.895773	146.08	284.895	1.73934	HMDB0003681	C02946	Organic acids and derivatives	Carboxylic acids and derivatives	Amino acids, peptides, and analogues	287.193	5	8	3479.66	4966.02	24995.9	5118.77	19319.9	9196.37	5639.86	9377.45	9042.11	6692.23	15403	6230.06	3536.88	7480.15	12944.6	6227.4	5019.89	6609.09	9398.32	8278.13	5765.36	8424.28	8921.21	3784.96	9591.8	2918.08	8209.84	7079.37	3601.27	8798.52	4822.27	3468.64	4747.53
M309T120	[M+H-2H2O]+	4.alpha.-hydroxystanozolol	2.76903	0.793014	0.41836	309.256	120.402	4.12245			Lipids and lipid-like molecules	Steroids and steroid derivatives	Estrane steroids	133.658	10	10	139684	1.07063e+06	180459	196380	606385	293741	322189	332993	728134	137648	255986	625986	486203	354886	469166	222965	399975	329514	134948	243629	521534	256828	285345	323998	538043	326638	152816	264334	254677	282646	189897	789050	410551
M123T69	[M+H-NH3]+	4-amino-1-methyl-4-piperidinecarbonitrile	1.12418	0.607837	0.341886	123.09	69.0155	1.06639			Organoheterocyclic compounds	Piperidines	Aminopiperidines	72.888	7	6	443649	118241	921129	133042	445511	16745.5	230804	34275.5	56146.2	140605	965373	321647	20616.3	1.50714e+06	216602	535955	26520.6	39482.1	506430	50298.2	19565.8	31263.7	17214.1	405916	12660.2	323222	373762	52357.8	397308	20121.6	1.13305e+06	58534.6	26121.3
M104T375	[M+H]+	4-Aminobutyric acid(GABA)	0.503237	1.4455	0.476987	104.07	374.557	2.9979	HMDB0000112	C00334	Organic acids and derivatives	Carboxylic acids and derivatives	Amino acids, peptides, and analogues	378.052	10	10	4179.21	13222.8	34321.1	16338.1	19674.2	13131.2	8557.2	10680.6	30881	9669.68	10626	18013.5	8412.55	12902.4	27142.7	6966.71	8178.08	11723.8	7132.54	14168.7	8600.5	8635.4	9506.38	5975.89	11139.3	5842.91	16752.3	9054.75	7068.78	8763.28	3965.45	18249	9906.72
M95T124	[M+H]+	4-aminopyridine	1.45715	0.974439	0.905417	95.0595	123.634	4.79948		C13728	Organoheterocyclic compounds	Pyridines and derivatives	Aminopyridines and derivatives	129.576	7	7	135460	72184.4	318002	204579	181236	219720	222511	200164	63665.2	172707	318529	177286	72128.2	406151	381051	222047	310862	224530	93668.3	252877	222301	112629	195770	183507	201384	76750.1	153401	171895	216321	225496	401090	235799	193137
M251T193	[M+H-3H2O]+	4-androstene-11.beta.,17.beta.-diol-3-one	0.430161	0.926291	0.686721	251.174	193.326	3.15812	HMDB0060339	C18075	Lipids and lipid-like molecules	Steroids and steroid derivatives	Androstane steroids	201.804	10	9	23240	14933.4	14347.9	34714.2	22825.1	30675.6	24079	40319.2	26790.7	31678.2	42300.9	9850.81	26635	27151.2	56410.8	25502.2	40464.6	28476.8	26890.1	22496.1	47804.4	14459.5	30103.6	27164.1	7963.05	22212.5	22216	46529.7	32297	20086.2	30984.9	21212.4	25233.6
M255T56	[M+H]+	4-chloro-n-cyclohexyl-2-nitroaniline	1.18248	1.24182	0.699112	255.112	56.3155	3.94872			Benzenoids	Benzene and substituted derivatives	Nitrobenzenes	67.925	10	9	565869	17127.5	376005	48641.4	248243	56270.9	60766	71420.6	27311	46186.6	80715	39813.8	37609.5	53895.4	60851.3	75227.5	68884.3	76845.2	71734.6	47980.5	79414	29446	47575.7	54279.9	21359.6	44537.8	321853	34832.8	45077.8	38416.8	69546.8	31055.1	47715.6
M385T33	[M+H]+	4-cholestenone	1.6474	1.01802	0.882165	385.345	33.13	3.32297	HMDB0000921	C00599	Lipids and lipid-like molecules	Steroids and steroid derivatives	Cholestane steroids	34.461	10	10	369620	478575	240408	299878	403157	283467	388560	319669	392268	313137	319503	556366	426757	221480	331162	420682	266982	201700	287832	236523	372850	325334	313980	327933	215947	529122	264242	253682	347468	371640	348855	239525	275286
M195T239	[M+H]+	4-hexylresorcinol	0.2412	1.06285	0.614115	195.137	238.564	2.36355	HMDB0032567		Benzenoids	Phenols	Benzenediols	241.63	10	10	48562	24581	47660.7	49687.8	36524.3	49630.2	38247.7	65449.5	47784.9	61219.9	58724.5	31964	49856.7	52211.4	66109.6	44606.2	61374.9	73151.1	42850.9	45998.5	56924.8	53100.5	61734.5	61618.8	43937.4	44495.7	38100.2	40454.1	44211.9	39628.6	69373.3	49016.7	41427.8
M202T106	[M+H]+	4-hydroxy-1-(2-hydroxyethyl)-2,2,6,6-tetramethylpiperidine	0.66405	1.08472	0.674384	202.179	105.737	4.38044						111.109	10	10	202597	116544	218925	96132.7	171642	236902	350895	261596	158665	470599	193621	282812	196530	220718	135117	334566	271353	456314	199342	308889	239080	392022	180008	343191	322785	275788	496591	124885	226083	188001	320348	251164	340563
M107T209	[M+H-H2O]+	4-hydroxybenzyl alcohol	0.680497	0.740684	0.0632135	107.048	208.715	3.89734	HMDB0011724	C17467	Benzenoids	Benzene and substituted derivatives	Benzyl alcohols	221.328	10	10	8679.52	32914.3	13927.7	25644.8	29051.8	20391.8	27110.1	17667.3	24767.7	28135.8	35548.2	32723.8	16792.7	27524.9	39977.4	29005.5	24478.6	24222.7	36478.8	25082.4	25637.4	27464	27920.6	14385.9	33045.8	12766.5	10305.8	44388.5	20344.1	34410.9	21837.2	41524.2	19500.9
M102T308	[M+H-CH2O2]+	4-hydroxy-l-isoleucine	0.741433	1.38116	0.305274	102.09	308.404	0.954255			Organic acids and derivatives	Carboxylic acids and derivatives	Amino acids, peptides, and analogues	318.975	10	10	9400.98	93440.1	19448.9	48297.7	43766.7	20298.7	24957.2	23627.5	19354.3	47825.5	23737.1	34803.5	36602.8	33062.7	30929.2	21255.4	30573.9	20760.1	31078.8	21270.5	19579.5	77057.9	23304	36832.8	19490.3	19656.4	17593.3	16881.3	42426.9	16428.2	9327.18	20845.6	34388.1
M168T299_2	[M+H]+	4-hydroxy-l-phenylglycine	0.852369	1.03781	0.763267	168.064	299.395	6.17494		C03493	Organic acids and derivatives	Carboxylic acids and derivatives	Amino acids, peptides, and analogues	304.193	10	10	124243	101997	136777	191674	134973	131013	94917.7	169483	70422.4	115649	117136	160915	142815	171171	212019	137540	141341	195886	95637.4	237054	131708	151233	157103	129896	195364	107957	121956	123292	100601	115875	125172	156839	172660
M157T112	[M+H]+	4-hydroxynonenal	0.878768	1.39986	0.260247	157.121	111.842	1.66776	HMDB0004362	C21642	Lipids and lipid-like molecules	Fatty Acyls	Fatty alcohols	136.278	10	10	10657	6318.28	30445.9	98064.6	15148.1	65954.3	29831	130424	9376.41	49892.9	71223.1	33489.3	41021.8	64479.3	87668.2	89187.6	78504.1	86490.3	80700.8	60416.5	74827.3	65530.1	97349.6	48073	41067.2	55453.6	34529.2	56298.9	54257.9	54885.3	104737	60178.5	62108.7
M121T38	[M+H-H2O]+	4-hydroxyphenethyl alcohol	0.625155	1.15341	0.11433	121.064	37.98	0.657823	HMDB0004284	C06044	Benzenoids	Phenols	Tyrosols and derivatives	52.401	10	10	72921.3	75182.6	72029.4	109295	56820	77306.4	81128.1	86668.5	72269.6	69347.5	73331.1	55245.9	83366.5	98921.5	90237.1	54738.2	99320.7	76418.9	57180.9	108172	66692.7	55771.2	45468.4	73491.3	98891.6	78879.2	114866	78483.8	76423	65319.5	76314.6	48428.7	86924.7
M530T70	[M+H]+	4-hydroxyphenylmaraviroc	0.661553	0.934101	0.786444	530.345	69.947	2.68071						71.806	6	8	48497	190443	68439.3	60588.7	193793	43416.4	115894	62009.2	36497.2	93058.4	80824.8	201797	117126	42156.3	27638	45280.3	70063.1	55400.5	110012	87238.5	52543.5	146158	60747.6	67927.8	86873.7	77685.5	73465.7	31325.2	65445.3	67178.7	117577	95563.8	61679.1
M146T84	[M+H]+	4-hydroxyquinoline	0.726931	1.1901	0.521687	146.059	84.487	2.5326		C06343	Organoheterocyclic compounds	Quinolines and derivatives	Quinolones and derivatives	87.949	6	9	134250	29857.4	117728	41259.7	68605.4	43427	49154.5	44427.4	36441	49157.9	40837.5	31423.1	33463.7	51445.5	55679.1	35861.7	56605.9	36888.4	50034.8	38021.5	31085.7	35828.7	29247	34433.8	39192.5	29940	64157.9	57254.6	38519.4	35640.2	30544.6	55505.8	37274.5
M139T290_2	[M+H]+	4-imidazoleacrylic acid	4.9139	1.31841	0.512484	139.05	289.777	7.00669	HMDB0000301	C00785	Organoheterocyclic compounds	Azoles	Imidazoles	303.794	10	10	1.04126e+06	1.58896e+06	2.54542e+06	377359	1.54824e+06	207430	361380	632645	971755	232289	299991	319669	240045	299834	416496	433218	151647	194608	163660	606974	461224	688715	318545	119763	348673	565922	826701	181383	358661	379228	119513	422526	205248
M172T396	[M+H-C6H6NI]+	4-iodosuberoylanilide hydroxamic acid	0.449185	1.02158	0.931505	172.096	396.347	3.58541			Benzenoids	Benzene and substituted derivatives	Anilides	412.628	10	10	93460.7	37195	46904	32145.5	33413.9	28893.9	10656.2	13582.5	55235	12891.8	28242.7	15555.1	15426	15276.7	15521.8	10286.2	15746.1	13759.9	11776.8	11562.1	24781.9	12403.6	13550	14779.5	20135.5	14474	51797.5	11315.9	9017.61	20134.2	23424.8	11527.4	12234.6
M262T224	[M+H]+	4-methoxy-.alpha.-pyrrolidinopentiophenone	0.458772	0.987015	0.956061	262.19	224.031	2.41743			Organic oxygen compounds	Organooxygen compounds	Carbonyl compounds	238.368	10	10	10506.2	4839.09	7292.36	26699.2	5295.02	34118.8	20662.4	26937	9748.73	29230.7	29095.4	14433.2	24345.4	22206.8	34823.8	24711.5	32952.2	21802.6	24568.4	18527.8	25090.6	14881.7	34251.1	31804.7	8785.07	21076	7991.77	22710.9	21161.6	20468.9	31590	16531.2	17669.8
M83T68	[M+H]+	4-methyl-1h-pyrazole	1.75599	1.25334	0.7607	83.0594	67.899	7.47376	HMDB0015344	C07837	Organoheterocyclic compounds	Azoles	Pyrazoles	76.292	6	7	247090	74860.1	421309	77378.7	315701	33366.1	174855	25855.9	29293.5	46893.8	28901.4	107872	26931.1	21531.5	77089.7	27180.6	28219.3	20931.8	24974.7	29229.9	5674.76	34692.7	18415.3	22538	26302.5	18269.5	170703	26252.3	16278.6	26568.1	3673.26	30631.8	24249.1
M182T321	[M+H]+	4-methyl-3-nitrobenzoic acid	0.42074	1.26645	0.510834	182.055	320.532	5.59686			Benzenoids	Benzene and substituted derivatives	Benzoic acids and derivatives	322.187	8	8	4239.8	23039	4234.26	5840.69	19476.7	4871.44	3988.21	4025.54	4628.42	6234.32	4118.17	17650.7	6592.1	3582.27	6175.48	3356.17	5956.51	5534.1	4560.57	2638.88	5697.79	3009.88	10021.3	5404.85	31199.5	9243.31	9405.4	5238.78	6467.36	4441.26	5461.28	3720.89	4968.66
M203T277	[M+H]+	4-methyl-.alpha.-ethyltryptamine	0.249376	0.956177	0.856411	203.175	276.531	0.628931			Organoheterocyclic compounds	Indoles and derivatives	Indoles	294.222	9	8	8312.49	14408.5	4876.52	4645.53	1463.68	4198.81	3101.29	11600.4	9391.49	4046.15	7556	7856.07	16683.8	8241.21	8241.76	11697.2	13843.2	5426.12	16800	2818.49	22324.2	4129.3	5609.84	9315.39	1064.6	3202.07	13743.4	9356.89	6142.35	4183.64	14463	7570.93	4877.99
M164T283	[M+H-CH5N]+	4-(methylamino)-4-(3-pyridyl)butyric acid	0.327884	1.07046	0.656324	164.069	282.673	2.77328			Organic acids and derivatives	Carboxylic acids and derivatives	Amino acids, peptides, and analogues	298.178	9	8	24591.9	19547.9	45750.5	21195.8	21804.5	17693.6	15141.7	22058	21996	21458.1	22491.5	22037.8	19041.9	17455.1	26429.5	18487.1	22524.8	19615	15715.6	12128.6	20520.5	14158.2	26172.9	18234.5	11919.3	19145.5	21596.8	5501.03	17824.7	13322.7	19859.1	12980.3	14895
M180T293	[M+H-ON]+	4-(methylnitrosamino)-1-(3-pyridyl)-1-butanol	0.266672	0.932989	0.740272	180.101	293.156	6.0844	HMDB0041809	C19574				295.229	8	6	9095.12	9343	10609.2	12944.3	10815.4	30767.8	20875.2	10749.5	9754.51	12328.1	15295.8	18220.5	20695.9	9235.99	19797	15498.8	18236.8	3505.99	13739.4	32704.2	22764.6	9567.42	15635.5	12470.1	19091.5	20164.9	12620.3	33545.4	20518	15938	20053.3	12255.3	16026.2
M154T90	[M+H]+	4-nitroanisole	0.590214	0.90984	0.807626	154.049	89.72	7.07288		C07555	Benzenoids	Benzene and substituted derivatives	Nitrobenzenes	92.618	6	8	272704	21695.9	128431	15939.8	77918.5	138834	91955.8	107101	11606.1	61769	113923	83332.8	9711.2	45915.3	237176	36487.9	19039	100466	64473.9	115934	10250.2	26626.6	58651.4	18362.6	55746.2	39244.7	47857	22220.4	11561.4	9135.07	83501.4	23098.6	22647.1
M199T52	[M+H]+	4-nitrosodiphenylamine	0.828904	0.972935	0.845641	199.086	52.412	1.52426		C19479	Benzenoids	Benzene and substituted derivatives	Aniline and substituted anilines	54.383	10	10	71668.1	51424	128894	132682	79743.8	204749	110553	233551	131642	167012	257283	157260	129608	146151	207357	129986	146449	151364	139665	151847	169790	120053	114497	190124	92368.6	140700	86985.1	128406	128329	149567	164650	126334	140978
M129T225	[M+H]+	4-piperidinecarboxamide	0.362145	0.781032	0.263152	129.101	225.369	4.60389	HMDB0000661	C00489	Organoheterocyclic compounds	Piperidines	Piperidinecarboxylic acids and derivatives	228.597	9	5	55228.1	15628.4	39803.7	14837.2	23412.4	13394.7	19992.5	41172.2	38024.5	29960.1	15708.2	29149.6	20279.8	37109.6	66350.5	21203.7	24451.4	26816.3	23423.4	47302	13422.4	25254.4	39024.6	19443.3	9651.42	12764.3	27250.4	23724	12320.4	11555.9	21004.4	24539.9	11846.1
M516T71	[M+H]+	4-quinazolinamine, 7-[2-[2-(dimethylamino)ethoxy]ethoxy]-2-(hexahydro-4-methyl-1h-1,4-diazepin-1-yl)-6-methoxy-n-(1-methyl-4-piperidinyl)-	0.952609	0.927885	0.798108	516.365	71.129	2.27485			Organoheterocyclic compounds	Diazanaphthalenes	Benzodiazines	76.009	8	8	79784.5	290479	103296	49801.2	305764	62679	93992	79302.5	29405.6	110868	109116	177942	354756	75726.7	95109.9	67880.3	156049	63566.8	126970	173841	79313.8	183062	86074.2	77661.6	166496	222117	44554	37425.4	48616.6	94359.6	188861	143289	117064
M486T297	[M+H]+	4-quinazolinamine, 7-[3-(dimethylamino)propoxy]-2-(hexahydro-4-methyl-1h-1,4-diazepin-1-yl)-6-methoxy-n-(1-methyl-4-piperidinyl)-	0.186356	0.722607	0.338072	486.337	297.446	1.40815			Organoheterocyclic compounds	Diazanaphthalenes	Benzodiazines	298.613	7	7	6052.94	21890.3	18880.6	18927.9	55194.1	9437.92	11208.7	10187.1	17362.3	8956.78	10568	18128.9	9819.66	20494.3	11615.7	10168.4	6310.39	15593.9	23217.8	42755.1	12721.5	21825.8	11893.3	9088.13	27282.2	9763.95	15143	13394.3	9002.62	5488.21	11019.6	14228.9	8969.92
M174T166	[M+H]+	4-quinolinecarboxylate	0.0317663	1.1431	0.486707	174.054	166.113	4.63851		C08043	Organoheterocyclic compounds	Quinolines and derivatives	Quinoline carboxylic acids	188.014	5	8	6950.26	23125.7	9691.94	12590.2	8253.1	10884.7	22625.5	10559.2	9382.47	20213.9	15455.3	24890.4	11536.2	11649.2	26938.5	26080.4	27222.2	30080	22273.5	25283.2	17724.6	14850.7	30397.2	28063.9	23302.6	16787	27904	15004.8	12000.7	21492.2	17515.6	15877.8	15570.2
M407T199	[M-H2O+H]+	(4r)-4-((1r,3s,5s,7r,9s,10s,12s,13r,14s,17r)-1,3,7,12-tetrahydroxy-10,13-dimethylhexadecahydro-1h-cyclopenta[a]phenanthren-17-yl)pentanoic acid	1.98582	0.871291	0.816078	407.278	198.562	3.61894	HMDB0000307		Lipids and lipid-like molecules	Steroids and steroid derivatives	Bile acids, alcohols and derivatives	213.86	10	10	145750	1.10671e+06	79377.9	102481	206941	106338	178869	129384	278978	70918.2	114835	652106	242103	93752.4	126032	93237.6	100760	69866.8	90958.2	124418	179590	93079.3	196783	60509.7	74398.8	60166.2	109769	82870.8	88137	130823	291129	722088	63903.4
M545T65	[M+Na]+	((4r)-4-((3r,5s,7r,9s,10s,12s,13r,14s,17r)-3,7,12-trihydroxy-10,13-dimethylhexadecahydro-1h-cyclopenta[a]phenanthren-17-yl)pentanoyl)glycylglycine	0.415515	0.925464	0.806618	545.321	64.729	3.05482			Lipids and lipid-like molecules	Steroids and steroid derivatives	Bile acids, alcohols and derivatives	79.716	7	7	20595.8	30266.8	26034.3	40596	29627.8	34735	18150.3	74035.5	18992.3	54966.2	112302	27209.7	44304.1	140063	28292.2	37553.3	50164	41338.4	14081.4	81562.2	40524.7	26329.8	22191.6	26350.7	134849	49099.7	26942.1	32158.5	26300.3	89475.7	72562.3	41618.4	26492.7
M836T197	[2M+Na]+	(4r)-4-((3s,5s,7s,9s,10s,13r,14s,17r)-3,7-dihydroxy-10,13-dimethyl-12-oxohexadecahydro-1h-cyclopenta[a]phenanthren-17-yl)pentanoic acid	1.0495	2.23935	0.26517	835.53	196.615	1.78104			Lipids and lipid-like molecules	Steroids and steroid derivatives	Bile acids, alcohols and derivatives	202.132	6	8	31365.6	168008	43341.6	24786.6	14097.7	16007.2	12391.6	9967.92	7450.17	18333.5	10646.3	30626.4	7253.79	14412.7	9057.54	9072.3	11652.8	9025.55	7701.73	11929.3	15080.1	11073.3	21339.1	10743.8	32577.8	9826.61	36609.2	12757.4	6908.1	9822.43	7426.53	25263.6	11987.8
M804T121	[2M+Na]+	(4r)-4-((5s,7r,9s,10s,13r,14s,17r)-7-hydroxy-10,13-dimethyl-3-oxohexadecahydro-1h-cyclopenta[a]phenanthren-17-yl)pentanoic acid	3.40326	0.628843	0.322119	803.54	120.713	2.53404			Lipids and lipid-like molecules	Steroids and steroid derivatives	Bile acids, alcohols and derivatives	132.176	10	10	52203.6	637742	64985.8	101531	536136	117907	80271.8	153337	1.06222e+06	53297.8	104612	216443	303381	82631.2	250958	107391	201775	167355	124128	152585	261527	140320	285895	173690	200309	183330	61717.5	147331	115663	128033	78383.9	332567	311411
M144T364	[M+H]+	5-(2-hydroxyethyl)-4-methylthiazole	5.65405	0.901732	0.74751	144.047	363.565	5.57193	HMDB0032985	C04294	Organoheterocyclic compounds	Azoles	Thiazoles	375.777	10	10	56047.2	152301	147610	1.79812e+06	196267	2.63969e+06	1.37884e+06	2.57447e+06	1.07808e+06	1.66794e+06	2.79184e+06	542796	1.02078e+06	2.37222e+06	3.35674e+06	1.37884e+06	2.74301e+06	1.96434e+06	1.44575e+06	1.15898e+06	1.68041e+06	931010	2.90185e+06	1.80762e+06	844747	610502	270141	1.66825e+06	1.46261e+06	1.33187e+06	2.6674e+06	1.63972e+06	2.45596e+06
M693T329	[M+H]+	5-[(3s,8r,10r,13r,14s,17r)-3-[(2r,3r,4r,5s,6r)-3,4-dihydroxy-6-(hydroxymethyl)-5-[(2s,3r,4r,5r,6s)-3,4,5-trihydroxy-6-methyloxan-2-yl]oxyoxan-2-yl]oxy-14-hydroxy-10,13-dimethyl-1,2,3,6,7,8,9,11,12,15,16,17-dodecahydrocyclopenta[a]phenanthren-17-yl]pyran-2-one	0.395208	0.762192	0.535453	693.353	328.79	2.81958			Lipids and lipid-like molecules	Steroids and steroid derivatives	Steroid lactones	343.625	7	6	1515.93	2006.02	5350.28	8781.46	3728.43	18578.8	1830.68	9601.94	1314.33	11159.2	2899.19	1512.04	1611.39	9175.54	2299.06	2658.03	7258.54	11783.8	8451.48	7643.51	3147.67	5614.86	2117.34	1269.28	41652.6	2186.61	2796.82	22925.2	2933.17	14822.7	3584.72	28502.3	8916.41
M417T37	[M+K]+	5-[5-(acetyloxymethyl)-1,2,4a-trimethyl-7-oxo-3,4,8,8a-tetrahydro-2h-naphthalen-1-yl]-3-methylpentanoic acid	0.350869	1.03891	0.653152	417.216	36.535	0.569087			Lipids and lipid-like molecules	Prenol lipids	Diterpenoids	52.41	9	10	420137	293949	250423	332070	327688	412881	360224	436997	398689	469287	336287	271027	451675	383394	379951	294228	396921	302323	315742	535196	336541	289179	285296	426957	459273	418345	530632	334920	305857	210097	503098	292329	359940
M129T300	[M+H]+	5,5-dimethylimidazolidine-2,4-dione	0.194574	1.11441	0.77373	129.065	300.392	1.94384			Organoheterocyclic compounds	Azolidines	Imidazolidines	314.214	9	5	4211.12	5705.89	29156.6	3628.1	4451.14	11078.7	3998	3925.52	3865.9	3806.28	5297.46	11636.7	6197.95	8704.95	4215.21	6797.26	3820.69	8660.56	4801.22	3544.08	8983.04	4294.78	5686.33	3443.55	14439	2290.18	7553.06	9436.53	3267.69	3504.48	5913.71	11867.5	2404.25
M297T397	[M+H]+	5,8,11,14-eicosatetraynoic acid	0.260946	0.566023	0.302039	297.18	396.759	3.13791			Lipids and lipid-like molecules	Fatty Acyls	Fatty acids and conjugates	406.265	9	8	51982.2	7220.47	5091.11	11173.1	5588.25	11853.1	5293.2	9165.62	9285.02	12795.6	8184.29	17811.9	6426.31	8034.27	10788.7	6494.66	11474.2	7993.19	5606.49	5674.6	5836.75	7907.27	6422.04	7311.15	6316.54	6428.41	6088.89	7222.48	7154.69	10760.8	16477	7517.62	7762.67
M335T218_2	[M+H]+	5.alpha.-pregnane-3.beta.,17-diol-20-one	0.15889	1.04777	0.802508	335.27	217.997	6.01512			Lipids and lipid-like molecules	Steroids and steroid derivatives	Pregnane steroids	219.686	10	10	6716.68	4589.28	5127.71	22921.3	5354.82	17516.6	22553.3	22113.1	14363.6	23606	20260.5	20333.4	21320.2	15896.4	24162.2	20810.6	24302.1	17271.1	23204	14329.5	21396.1	11603.7	17364.1	21128	6589.56	27118.3	5391.43	15283.4	16160.5	14636.5	24079.1	16685.5	14008.9
M172T384	[M+H]+	5-aminoorotic acid	0.322281	1.14504	0.687474	172.059	383.932	6.08665			Organoheterocyclic compounds	Diazines	Pyrimidines and pyrimidine derivatives	391.487	7	6	24208.3	7695.09	34206.9	4882.89	14851.7	10741.9	4163.56	7603.26	16769.7	3026.37	3311.84	3412.2	11852.3	6705.73	17054.9	7867.15	11239.6	9588.6	9226.61	6270.59	2892.55	2234.74	1558.08	7653.53	4299.07	8747.08	19063.5	7489.49	4011.92	3752.8	10863	4068.85	1781.41
M118T386	[M+H]+	5-aminovaleric acid	0.828248	1.10732	0.646703	118.086	386.137	1.87501	HMDB0003355	C00431	Organic acids and derivatives	Carboxylic acids and derivatives	Amino acids, peptides, and analogues	388.323	10	10	268292	1.17322e+06	903877	1.609e+06	637678	637704	784697	793223	512438	752471	911090	1.54455e+06	233490	806254	387474	759531	633695	871462	1.16532e+06	830379	800614	1.33586e+06	324255	167662	950556	146702	701945	1.20578e+06	276037	1.14666e+06	402515	1.19709e+06	885564
M160T387_1	[M+H]+	5-aminovaleric acid betaine	2.58352	0.957746	0.808997	160.133	387.449	1.28229			Lipids and lipid-like molecules	Fatty Acyls	Fatty acids and conjugates	388.963	10	10	1.12951e+07	4.70782e+06	5.54065e+06	4.78548e+06	9.08833e+06	5.74439e+06	3.23137e+06	4.29045e+06	6.8923e+06	7.58797e+06	5.76625e+06	7.27645e+06	4.46763e+06	4.77281e+06	8.03547e+06	1.07428e+06	3.48504e+06	3.76167e+06	3.90927e+06	5.82519e+06	2.42093e+06	6.48914e+06	4.82159e+06	1.406e+06	2.9409e+06	5.37528e+06	5.34159e+06	2.60361e+06	1.74801e+06	4.68657e+06	6.49724e+06	6.86948e+06	3.18431e+06
M303T243	[M+H]+	5-(diphenylphosphinyl)pentanoic acid	0.774348	0.80539	0.462533	303.133	243.042	2.2017			Benzenoids	Benzene and substituted derivatives	Phenylphosphines and derivatives	258.627	6	6	21755.3	38317.6	13282.6	15648.4	13930	11648.4	20800.8	25156.4	63444.2	45591.4	14911.4	53604.2	51816.5	12650.5	18649.2	14389.8	14410.4	15963.8	16643.3	10849.2	46975.2	13431	15588.9	17162.4	10195.8	22723.9	13223.1	17493.9	39216.3	16679.8	22251.8	13784.6	12600.2
M353T374	[M+Na]+	5'-(furan-3-yl)-4a-hydroxy-4,7-dimethylspiro[5,6,7,8a-tetrahydro-1h-naphthalene-8,3'-oxolane]-2,2'-dione	0.357611	0.83156	0.245905	353.134	374.289	2.45598			Lipids and lipid-like molecules	Prenol lipids	Terpene lactones	393.281	8	7	4883.09	4878.27	5392.87	11194.7	6731.01	9018.07	3835.74	8623.79	10008.7	7667.82	5883.08	7889.13	6543.9	10470.5	7242.16	4085.23	8983.67	6339.81	6756.65	3596.27	10499.7	5565.45	5288.69	5029.91	6960.53	2586.33	4838.09	5780.94	7165.79	4867.79	2971.15	7756.97	8518.27
M373T549	[M+Na]+	5-heptenoic acid, 7-[(1r,4s,5s,6r)-6-[(1e,3s)-3-hydroxy-1-octen-1-yl]-2-oxabicyclo[2.2.1]hept-5-yl]-, (5z)-	0.32249	1.27027	0.180923	373.243	549.383	4.36953			Lipids and lipid-like molecules	Fatty Acyls	Eicosanoids	564.169	9	7	13601.3	4572.56	10091.5	19858.3	14789.5	18881.1	11754.5	18673	8068.7	15223.5	22838.8	16183.6	9760.98	19611	13439.1	26950.7	25511.2	26172.9	20927.5	16469.3	16214.9	16374.8	10943.9	18830.8	36646.3	23058.3	7025.52	19154.9	15109.5	18915.5	10148.1	21824	15142.2
M110T275	[M+H]+	5-hydroxy-2-methylpyridine	0.260192	0.96392	0.855075	110.059	275.319	4.32044			Organoheterocyclic compounds	Pyridines and derivatives	Methylpyridines	280.55	8	4	6067.24	4041.78	3444.74	9248.42	2732.71	10064.8	6085.33	8158.94	4625.86	9479.12	12691.5	4784.69	6340.27	10187.5	13027	8185.2	13469.8	8239.58	6814.2	10985.6	13009.7	5610.36	11000.1	11071.4	3025.11	4829.54	3745.03	7980.12	13947.4	7196.33	7651.14	5418.28	8060.68
M106T18	[M+H-CO]+	5-hydroxyindole	0.485961	1.56634	0.0551509	106.064	18.042	1.80898	HMDB0059805		Organoheterocyclic compounds	Indoles and derivatives	Hydroxyindoles	38.021	5	10	15354	29091.8	5814.14	20581.4	8099.82	26143.2	5001.77	14799.9	27407.4	7855.27	8301.61	11586.3	13277.3	6525.07	17719.4	7983.28	15095.6	16694	11216.8	10618.4	6042.44	7288.92	6626.46	8376.81	11160	13224.7	4530.58	9190.45	15279.5	7931.58	13655.6	4988.53	20072.6
M221T108	[M+H]+	5-hydroxy-l-tryptophan	0.522884	0.942995	0.753878	221.102	108.496	0.243777	HMDB0000472	C00643	Organoheterocyclic compounds	Indoles and derivatives	Tryptamines and derivatives	127.484	10	6	32861.2	28967.2	21611.7	70501.1	43457.4	74589	62070.5	51240.4	21107.9	59256.8	78517.5	36665.7	70164.9	56656.2	70461.1	58481	85794.5	52751.7	62204.2	37223.3	61637.2	41683.4	53969.1	79703.7	16090.9	56879.5	26289.1	72271.3	57425.7	56486.8	85801.1	28569	47138.7
M174T39	[M+H-C2H7N]+	5-methoxydimethyltryptamine	0.912261	0.814176	0.630526	174.09	38.818	0.109981	HMDB0002004	C08309	Organoheterocyclic compounds	Indoles and derivatives	Tryptamines and derivatives	72.871	10	10	141443	19037.6	63589.1	91435.9	30785.5	10661.1	39982	45467.4	221888	39762.1	35012.4	7827.04	10408.7	47460.8	69455.9	15465.8	41336.5	37673.3	25247.4	45601.5	17993.1	43407.5	64859	12346.8	20852.8	10537.3	41524.2	11391.1	28873	5312.43	39274.7	27630.7	33647.5
M126T192	[M+H-C5H8O3]+	5-methyl-2'-deoxycytidine	0.434239	0.862867	0.686096	126.065	191.879	6.18523		C03592	Nucleosides, nucleotides, and analogues	Pyrimidine nucleosides	Pyrimidine 2'-deoxyribonucleosides	201.345	10	10	313687	36699	206302	44594.3	111627	83306.6	79454	34035.9	23731.6	134181	110010	110100	10087.6	49558.1	199442	32478.5	37974.5	23302.8	61892.1	51113.1	55426	31862.1	65521.2	28036.9	44536.3	11850.5	45871.7	51827	41482.9	42555.2	58612.2	99322.7	56608
M186T114	[M+H]+	5-oxo-1-propyl-2-pyrrolidineacetic acid	0.182829	0.782285	0.487916	186.122	113.774	1.65706			Organoheterocyclic compounds	Pyrrolidines	N-alkylpyrrolidines	118.019	7	5	100982	3954.04	91488.4	56779.9	66986.9	11695.6	25572.2	110687	63418	32732.4	31165.5	26852.8	82788.6	149815	43875.7	107900	23194.8	86399.9	24794.9	94896.2	75438.5	6297.18	62787.9	17616.2	65718.5	45460.6	85061.8	57579.5	36141.3	21263.5	50003	15961.1	6570.8
M575T410	[M+H]+	5(s)-5-carboxystrictosidine	0.29268	1.03701	0.849279	575.246	410.488	9.22035			Lipids and lipid-like molecules	Prenol lipids	Terpene glycosides	416.447	4	8	14962.9	15497.1	22444.2	2717.89	20015.1	13821.9	12913.2	17143.9	9210.75	18395.6	11355.7	7709.83	11493.6	9894.33	13075.3	10754	13579	15701.2	13005.5	18098.5	6694.46	14369.7	12529.4	11615.7	29129.6	7855.33	10799.6	12600	4645.64	11447.5	6650.3	13426.3	12425.6
M415T37	[M-H2O+H]+	6-[3-[(3,4-dimethoxyphenyl)methyl]-4-methoxy-2-(methoxymethyl)butyl]-4-methoxy-1,3-benzodioxole	5.94902	1.11575	0.180073	415.211	36.9105	1.04432						59.648	10	10	1.06858e+07	7.34029e+06	6.54681e+06	7.66422e+06	8.26904e+06	9.20411e+06	8.15204e+06	9.93158e+06	7.2393e+06	9.16142e+06	6.30563e+06	4.46402e+06	1.00605e+07	9.02228e+06	8.50588e+06	6.33409e+06	9.28432e+06	6.88419e+06	6.64767e+06	1.20764e+07	7.76685e+06	6.97443e+06	5.63019e+06	9.81081e+06	1.16361e+07	8.06125e+06	1.18825e+07	7.2346e+06	6.58981e+06	4.96181e+06	9.41289e+06	5.85914e+06	8.71622e+06
M684T458	[M+NH4]+	6-acetylacteoside	0.276123	1.17643	0.492022	684.252	457.972	1.93942			Phenylpropanoids and polyketides	Cinnamic acids and derivatives	Hydroxycinnamic acids and derivatives	472.226	10	9	27271.6	30393.5	12300.5	49893.7	38086.7	16543.6	28170.3	45108.9	29390.1	24541.9	24711.2	16079.4	20771.4	31842.8	22694.5	145445	25523	20320.5	23789.1	29968.5	39900.3	20174	10150.2	20234.9	23867.8	16700.3	19067.1	21172.2	6467.93	9344.89	10341.2	13499.2	18835.7
M350T402	[M+Na]+	6-acetylmorphine	1.07646	0.824496	0.34134	350.154	402.489	2.50088		C11781				404.275	10	10	15752.5	22929.3	13835	46971.8	15036.2	64518.6	52810.8	76057.5	85265.9	88049.3	76573.4	37537.4	79901.3	56201.1	80603.2	48926.2	81046.3	70539.2	62703.4	37697.6	65442.4	46322.5	54770	40353.3	33930.6	46455.2	6030.91	37065	53253.7	42588.5	86542.9	42232.5	46764.5
M344T370	[M+H]+	6.beta.-naltrexol	0.485657	0.95054	0.801497	344.191	370.126	1.68612						387.511	9	7	16627.9	59199.7	24790.1	69420.9	33316.5	33625.8	20523.8	53289.4	68218.1	36765.6	18952.6	50235.8	29941.9	36750.8	23156.9	42071.4	22686.1	24575.2	31489.3	14155.5	40607.3	28740.6	28321.5	35541	64739	34279.9	24622.4	35556.3	38924.4	45326.4	36920.4	64210.6	13589.9
M277T183_2	[M+H-H2O]+	[6]-gingerol	0.246602	1.05568	0.638128	277.19	183.011	1.48016		C10462	Benzenoids	Phenols	Methoxyphenols	202.558	7	10	10884.1	13674	15286.1	15936.2	18132.8	13358.4	15467.1	22940.7	27213.3	17862.6	15558.8	17539.2	18669.7	16386.7	14578.4	36869.6	19646.3	23022.9	17310.9	20965.7	36194.5	15076.5	57575.9	13980.4	15747.8	19852.4	24282.1	16198.7	14350.4	16571.8	16803.5	18509.5	14450
M479T243	[M+Na]+	6h-thieno[3,2-f][1,2,4]triazolo[4,3-a][1,4]diazepine-6-acetic acid, 4-(4-chlorophenyl)-2,3,9-trimethyl-, 1,1-dimethylethyl ester, (6r)-	0.405093	1.23427	0.673496	479.135	242.614	3.39669						264.945	9	5	884.646	2192.65	2118.91	34855.1	1451.51	42312.4	16376.3	11571.5	1685.89	26750.9	15027.8	6383.86	1962.65	11378.2	3948.93	14640.8	14580.2	21451.4	18017.1	20585.1	33073.8	8126.23	5267.7	14967.6	18202.7	3944.4	2434.26	61830.1	7840.89	25062.8	4374.12	8562.73	10731.1
M164T48	[M+H]+	6-hydroxy-3,4-dihydro-1h-quinoline-2-one	0.716139	0.805875	0.752475	164.07	48.269	5.39447			Organoheterocyclic compounds	Quinolines and derivatives	Quinolones and derivatives	50.031	10	10	51347.1	72627.2	216206	41394.1	119960	28055.3	95158	38292.2	319383	83216	253681	58846.1	113991	1.30883e+06	625538	42082.7	59509.8	44817.8	56022.4	187876	37080.8	114933	81832.3	29136.1	43610.9	152216	49351.5	46331	32047	81010	28949.8	31669	78642.6
M249T165	[M+H]+	6-hydroxymelatonin	0.625545	0.854281	0.431419	249.138	164.844	4.06176	HMDB0004081	C05643	Organoheterocyclic compounds	Indoles and derivatives	Hydroxyindoles	176.639	10	6	21797.3	2071.31	20329.4	42643.6	17854.6	39073.8	40727.9	41278.3	29917.5	30281.4	50195.9	14698	41640.7	29418.8	52452.6	32455.7	51207.6	35862.5	37259.6	22504.6	43494.4	15679.2	40917.5	42150.2	27648.3	18853.6	4899.21	39596.3	37520.9	35368.4	18504.7	30083	36065.5
M267T206	[M+H-2H2O]+	6-ketoestriol	0.440284	0.928124	0.672822	267.158	206.277	5.27954	HMDB0000530		Lipids and lipid-like molecules	Steroids and steroid derivatives	Estrane steroids	229.635	9	6	14602.8	4513.4	6605.19	13656.9	14062	24653.6	15980.9	22996.5	23161.4	20551	4344.5	10652.3	21378.5	15516.2	26183.1	22018.1	29291.3	22463.7	18654.7	16634	20390.7	9290.55	10801.4	27844.5	13983.3	18426	11717.7	13582.4	17876.6	18039.5	5914.25	18193.8	18251.3
M182T65	[M+H]+	6-(methylthio)guanine	2.0176	2.04214	0.299462	182.048	64.861	1.37445			Organoheterocyclic compounds	Imidazopyrimidines	Purines and purine derivatives	73.796	7	8	344011	16633.8	35723.5	7630.51	15650.7	734114	12785.9	5950.36	10083.2	427915	3822.25	14824.4	8277.4	636233	10578.2	4227.62	665016	476606	323239	510652	500240	760.875	662216	476385	151954	5254.71	22137.3	544772	375075	3466.88	12825.6	15453.1	504363
M475T68_1	[M+H]+	6''-o-acetylgenistin	0.500446	0.669207	0.317265	475.122	67.782	0.685166			Phenylpropanoids and polyketides	Isoflavonoids	Isoflavonoid O-glycosides	70.886	10	10	11355.7	7613.4	4152.96	27469.8	8715.08	10096.7	7763.23	12519.9	4095.12	14598.2	11686.4	5645.57	8762.14	41946.5	16809.2	27027.1	19744.7	16017.3	9655.8	12101.9	16566.7	14605.1	9632.67	18574.3	22561	5002.47	16130.7	30304.8	20648.3	15619.7	11378.8	17816.6	14175.8
M503T235	[M+H]+	6''-o-malonyldaidzin	0.0789606	1.19097	0.251985	503.115	235.287	1.55006			Phenylpropanoids and polyketides	Isoflavonoids	Isoflavonoid O-glycosides	242.741	7	6	1565.56	1186.67	1325.92	3514	1175.87	2860.3	2312.24	1572.1	1573.97	1662.6	1817.21	827.684	1678.25	1424.56	1599.71	2367.8	2592.78	1869.78	1706.01	2222.05	1115.48	3067.2	2611.64	1615.97	2390.98	1415.97	2101.27	1664	1472	1590.24	1729.41	2285.41	2372.6
M585T378	[M+Na]+	7-[3-[(2r,3r,4r)-3,4-dihydroxy-4-(hydroxymethyl)oxolan-2-yl]oxy-4,5-dihydroxy-6-(hydroxymethyl)oxan-2-yl]oxy-3-(4-methoxyphenyl)chromen-4-one	0.361374	1.09758	0.685122	585.141	378.212	0.0718634			Phenylpropanoids and polyketides	Isoflavonoids	Isoflavonoid O-glycosides	387.467	8	8	6389.54	7229.23	12425.6	20403.6	9353.07	8362.01	10681.1	21841.8	3015.17	9701.84	24619.6	11042.5	3675.09	18888.8	14254.4	20882.7	13810.9	12754.6	11908.2	18306	24500.7	9282.83	12098.3	11795.9	29776.7	3340.41	9632.12	21903.7	7000.98	19175.3	3984.24	9028.09	12976.6
M342T244	[M+H]+	7-acetyllycopsamine	0.501211	0.722365	0.270883	342.202	243.988	7.12731		C16751				248.631	3	5	24955.1	51394.4	24495.6	40852	35940.8	33908.3	34489	42079.3	26296.1	56153.6	32542.7	28757.4	31016.4	38822	43636.5	34448.5	30553.8	40761.5	32417.1	21419.4	147102	36321.9	36452	25812.7	47697.9	37907.1	29484	34841.1	28690.3	38633	68273.6	66520	27875.7
M417T146_2	[M+H]+	7.alpha.,12.alpha.-dihydroxycholest-4-en-3-one	1.43926	0.871282	0.676229	417.335	145.864	1.41886		C17339	Lipids and lipid-like molecules	Steroids and steroid derivatives	Cholestane steroids	155.934	10	10	113069	189329	22880.1	140030	29424.3	43793.4	80863.3	198604	228351	165081	137670	327397	354810	40258.9	186162	130234	121117	78928.4	199285	46848.9	225381	124619	73995.7	141670	40395.7	389007	73644.1	127667	189215	256988	244435	66005.3	40058.8
M365T31	[M+H-3H2O]+	7.alpha.,25-dihydroxycholesterol	1.12646	0.73922	0.133077	365.319	31.194	3.68103	HMDB0006280		Lipids and lipid-like molecules	Steroids and steroid derivatives	Cholestane steroids	52.407	10	10	250520	197969	173187	81526.6	333670	50355.3	235703	116916	179811	197791	96897.3	242158	150921	145051	117599	92283.7	75826.9	90565.3	244348	71930.9	103933	96478.1	100782	119802	88754.4	118449	227409	64723.3	77479.2	80604.7	104188	100104	70757.7
M401T211	[M+H-H2O]+	7.alpha.,27-dihydroxycholesterol	0.649106	1.28523	0.557311	401.335	211.184	3.38709		C06341	Lipids and lipid-like molecules	Steroids and steroid derivatives	Bile acids, alcohols and derivatives	213.433	8	8	23662.9	32941.9	30992.1	125788	38572.5	37920.9	28813.5	28828.6	25127.8	32496.3	30854.5	37282.5	38628.8	139301	28473.6	31953.1	29029.3	31846.7	31842.1	46465.4	36612.9	171268	29805.8	144392	41582.9	21833	33615.3	35075.7	119799	149699	37703.5	161024	186433
M383T34	[M+H-H2O]+	7.alpha.-hydroxy-4-cholesten-3-one	1.38211	0.999667	0.997654	383.329	33.754	4.84445	HMDB0001993	C05455	Lipids and lipid-like molecules	Steroids and steroid derivatives	Cholestane steroids	35.347	10	10	249314	318916	265974	171307	286219	126705	210427	171010	234800	217655	212452	343837	239954	153539	184187	205553	160794	149559	177113	170673	193505	222903	203070	171798	144266	230919	304924	136897	169174	171898	262310	174462	162739
M353T198	[M+H-3H2O]+	7-keto-3.alpha.,12-.alpha.-dihydroxycholanic acid	1.52078	1.76401	0.528768	353.246	198.377	3.00164			Lipids and lipid-like molecules	Steroids and steroid derivatives	Bile acids, alcohols and derivatives	203.132	10	10	30297.9	703903	29542.1	64385.5	31137	53685.3	42351.8	36166	44500.3	29017.9	18538.2	284378	42835.4	60870.3	20368	38795.7	52154.9	50852.9	40678.3	60800.8	63726.9	27416	68168.4	18079	49018	8875.78	34307.2	51150.2	39880.5	73498.3	51980.1	139225	27180.6
M166T186	[M+H]+	7-methylguanine	0.96817	0.551221	0.434488	166.071	185.569	8.59363	HMDB0000897	C02242	Organoheterocyclic compounds	Imidazopyrimidines	Purines and purine derivatives	210.428	10	10	1.08609e+06	36279.4	241710	125866	203828	22212.4	179098	19753.4	26028	148935	80418.4	81023.9	21220.4	52141	1.3592e+06	56279.6	31792.3	283654	296094	387929	165157	95021.1	161769	21077	303880	155490	72938.5	49430.8	24901.2	34361.5	165681	248389	144200
M298T199	[M+H]+	7-methylguanosine	0.302259	0.727842	0.59385	298.115	199.425	0.936867	HMDB0001107	C20674				213.823	5	6	14191.7	7050.25	8322.38	15936.2	10412.9	1913.71	8996.43	11173.8	12320.8	22094	12410.1	5939.27	2988.6	15915	92102	16371.9	12353.8	7813.18	8621.46	37173.6	16484.8	10554.2	25805.8	3589.42	10763.8	8559.49	5833.33	14131.1	3361.16	11040	5084.9	11339.6	9781.1
M356T80	[M+H-H2O]+	7(z),10(z),13(z),16(z),19(z)-n-(2-hydroxyethyl)docosapentaenamide	2.47472	1.44139	0.231126	356.278	79.537	0.666841			Organic nitrogen compounds	Organonitrogen compounds	Amines	82.401	8	7	76058.4	147809	533494	236887	484079	254216	196285	111463	67390.3	217270	198243	175166	141537	91129.4	180035	197042	187149	202930	213375	180007	154632	250146	147047	160015	183350	164354	218004	193578	101080	129724	185591	177755	193772
M339T37	[M+H]+	8,9-dihydroxy-5z,11z,14z-eicosatrienoic acid	1.1789	0.960565	0.895598	339.252	37.43	5.03792	HMDB0002311		Lipids and lipid-like molecules	Fatty Acyls	Eicosanoids	40.301	9	8	254406	170160	88745	73571.5	54421	65854.8	55376.5	63211.7	265763	67325.5	103806	89101.8	56920.7	76994.5	89665.5	258393	113146	68587.9	66977	97024.8	125530	149024	125728	78460.7	91527.3	228092	83590.1	56191	154247	63281.9	282714	79620.9	64756.6
M203T49	[M+H-CH2O2]+	8-acetyl-6,7-dimethoxycoumarin	0.319629	1.00604	0.975141	203.081	49.1615	1.52253						60.401	10	10	57621.5	49760.8	60455	27814.2	55363.1	69488.1	24376.9	28524.9	67098.6	39695.5	32264.6	34579.3	18855.6	36245	41425.1	27901.2	32311.9	33552	44656.2	35312	21621.1	55078.3	20532.4	20584.2	48689.4	14610	43518	50665.4	18313.8	32346.2	15665.7	53443.9	33366.8
M417T211	[M+H]+	8'-apo-.beta.-carotenal, all-trans-	0.651648	1.46411	0.17105	417.309	210.6	4.11088		C19728	Lipids and lipid-like molecules	Prenol lipids	Triterpenoids	212.771	9	9	7470.79	55824.9	34604.3	15328	11788.2	12392.3	16802.7	15909.2	25112.3	19345.2	18522.9	16676.9	15737.4	13170.4	18091.9	14513.2	17634.1	15607.5	22234.4	12131.8	38910.5	9025.54	13214.4	16423.1	42947.1	9682.59	37617.5	10297.4	13255.6	12360.8	17091.4	14851.5	12910.8
M315T79	[M+H]+	9,10-dihydroxy-12z-octadecenoic acid	4.92849	1.12407	0.799809	315.252	79.119	2.82211			Lipids and lipid-like molecules	Fatty Acyls	Fatty acids and conjugates	82.886	10	10	612394	1.04293e+06	4.37679e+06	575610	4.44602e+06	937242	737497	434981	1.49645e+06	1.1603e+06	783775	1.14055e+06	1.30183e+06	693217	919525	792305	657146	721596	567545	650628	707702	1.34082e+06	485387	510316	1.09114e+06	913441	1.24978e+06	706933	418505	705333	956457	800631	569794
M277T70_2	[M+H]+	9,12-octadecadiynoic acid	7.36814	1.35574	0.188116	277.215	70.015	6.73631			Lipids and lipid-like molecules	Fatty Acyls	Fatty acids and conjugates	85.33	8	10	1.13996e+06	715203	3.19409e+06	5.75234e+06	1.89912e+06	4.28238e+06	2.80672e+06	6.74332e+06	790331	4.66147e+06	4.93931e+06	2.72043e+06	2.49723e+06	3.55119e+06	4.5332e+06	3.77024e+06	4.54828e+06	5.15843e+06	5.60557e+06	4.24531e+06	3.40284e+06	3.32527e+06	4.31499e+06	2.745e+06	2.66387e+06	2.88254e+06	2.57244e+06	3.62518e+06	2.72505e+06	3.14319e+06	6.19497e+06	3.84485e+06	3.64254e+06
M277T35	[M+H-H2O]+	9-oxo-10(e),12(e)-octadecadienoic acid	4.87791	1.29347	0.370048	277.215	34.516	2.89881			Lipids and lipid-like molecules	Fatty Acyls	Lineolic acids and derivatives	39.558	9	10	1.00475e+06	855459	2.22601e+06	1.3742e+06	1.44081e+06	3.20901e+06	1.48801e+06	6.70134e+06	971320	3.06956e+06	6.5633e+06	3.23703e+06	2.93929e+06	1.106e+06	5.69188e+06	4.88683e+06	3.13559e+06	2.03727e+06	1.65204e+06	1.07332e+06	5.23898e+06	4.11971e+06	4.73123e+06	5.99688e+06	1.65812e+06	3.57651e+06	2.81881e+06	2.56567e+06	2.14415e+06	3.09901e+06	3.80233e+06	2.45964e+06	5.57281e+06
M311T55	[M+H]+	9-oxo-11-(3-pentyl-2-oxiranyl)-10e-undecenoic acid	4.32243	1.24686	0.434616	311.221	55.463	2.99335	HMDB0013623		Lipids and lipid-like molecules	Fatty Acyls	Fatty acids and conjugates	56.927	10	10	400075	248289	887200	2.92159e+06	511564	2.41825e+06	1.53454e+06	4.06709e+06	349503	2.47008e+06	3.09938e+06	1.59043e+06	1.87558e+06	2.149e+06	3.08524e+06	2.36806e+06	2.72214e+06	2.88177e+06	3.30241e+06	2.15575e+06	1.81362e+06	3.04971e+06	2.89099e+06	1.58843e+06	1.40079e+06	1.88857e+06	2.1429e+06	2.18443e+06	1.60438e+06	1.96847e+06	4.25925e+06	2.07152e+06	2.11134e+06
M259T365	[M+H]+	Acadesine (drug)	0.273465	1.1486	0.772761	259.081	365.026	6.32179	HMDB0062179	C04663				381.917	6	4	9533.84	6992.53	18531.7	33024.4	18767.4	14363.5	15250.4	19308.6	18740.3	15891.1	7944.55	9964.17	6307.22	7855.94	36199.4	18953.9	8273.14	13226.6	6173.41	18830.3	10495.9	9858.92	14107.3	11214	6700.13	5054.66	5427.86	15197.4	11024.5	5472.14	2506.15	3342.23	10664
M668T301	[M+Na]+	Acarbose	0.627764	0.902055	0.783001	668.219	300.734	1.82789		C06802	Organic oxygen compounds	Organooxygen compounds	Carbohydrates and carbohydrate conjugates	302.773	9	6	7240.46	30872	5279.93	6418.57	9862.88	5630.28	7323.59	21325.2	49799.4	14266	7085.63	9823.86	11036.5	7033.42	9009.85	15942.7	8246.17	20808.5	4924.51	4583.55	11116.6	5284.85	8055.11	9387.54	8093.65	14012.4	5389.23	2751.73	13447.9	10645.8	5990.8	13176.5	8033.19
M337T294	[M+H]+	Acebutolol	0.356349	1.07665	0.694059	337.222	294.238	0.831635	HMDB0015324	C06803	Organic oxygen compounds	Organooxygen compounds	Carbonyl compounds	320.124	10	9	5373.77	10438.3	13853.1	22281.9	9227.02	26429.5	28337.9	31028	11885.1	28319.7	35539.1	17712.8	14748.4	22724.7	31623.2	25605.7	27173.1	19185.3	29268.8	11339.1	31562.4	10036.1	26320.3	32270.5	8329.28	16066.6	9007.26	20305.9	24097.8	15030	36693.4	18901.6	23143.2
M633T259	[M+K]+	Aceroside viii	0.398963	1.46095	0.0908533	633.253	259.255	0.697708			Phenylpropanoids and polyketides	Diarylheptanoids	Linear diarylheptanoids	284.986	10	10	9164.9	25434.5	11406.2	8087.91	11552.6	7226.8	15585.9	7272.39	6910.75	7268.26	10467	9627.07	7689.75	6534.48	9149.8	10140.8	18990	7060.28	8191.24	7707.61	11765.4	7560.77	11116.9	9725.87	9486.42	8653.82	1750.66	7142.13	6503.41	5578.46	10726.1	6845.27	11582.9
M110T53	[M+H-C2H2O]+	Acetaminophen	0.327013	0.871293	0.54978	110.08	53.151	4.306	HMDB0001859	C06804	Benzenoids	Phenols	1-hydroxy-2-unsubstituted benzenoids	54.044	10	9	39474.4	20907.3	46221.7	12549.2	32487.9	16272.4	14487.8	19743.1	47710.7	15237.5	25907.3	22114.9	11689.1	35237.9	37203.8	16469.8	38773.9	17378	17495.7	37863.5	12545.7	17381.6	26112.1	19269.9	18108.9	8816.82	26579	9088.32	9086.64	10766	12220.5	19550.9	33643.2
M413T141	[M+H-H2O]+	Acetic acid, 2-[[(2z)-4-[(1r,2r,3r,5r)-5-chloro-2-[(3r)-3-cyclohexyl-3-hydroxypropyl]-3-hydroxycyclopentyl]-2-buten-1-yl]oxy]-, 1-methylethyl ester	0.595073	0.951035	0.838065	413.222	141.489	9.17364			Organic oxygen compounds	Organooxygen compounds	Alcohols and polyols	162.585	10	8	15432.6	10723.5	11920.9	36664.9	14722.1	54384.4	48630.1	54282.7	11910.5	47663.6	54666.6	26273.1	56195.4	43309.7	63678.2	45167.5	58775.9	60259.2	52417.6	32570.2	40421.9	32950.3	33795.7	47747.9	15963.2	44029.1	11121.2	52210.9	41415.3	60166.4	52781.4	23242.5	47282.8
M181T132	[M+H]+	Acetoveratrone	1.06971	1.24855	0.664404	181.107	131.696	4.24446			Organic oxygen compounds	Organooxygen compounds	Carbonyl compounds	139.738	9	9	70510	8966.85	288741	59608.6	88662.3	19456.4	59917.2	43391	84113.7	25156.1	43406.5	21657.9	20669.7	57350.5	52343.4	28428.5	29693.5	32111.7	13225.8	40132.3	17729.6	24302	37283.6	4347.39	26736.4	21214.4	241808	21653.2	21165.6	15927.8	14543.7	30052.6	24887.3
M204T308	[M+H]+	Acetylcarnitine	0.577321	1.16286	0.816139	204.122	307.612	2.88183		C02571				312.944	8	10	16964.2	34897.7	24252.8	62124.2	42440.8	52569.6	102488	72079.5	21876.1	75531.8	69989.3	65384.8	48062.2	126704	269609	94555.8	62082.7	50538.9	83989.3	280853	79975.5	96240.5	103174	46249.5	41938.8	45610.6	17818.5	68422.2	59637.8	52376	52460.9	44367.7	53682.2
M146T379	[M]+	Acetylcholine	4.17977	0.842732	0.414118	146.117	379.331	5.43037	HMDB0000895	C01996	Organic nitrogen compounds	Organonitrogen compounds	Quaternary ammonium salts	381.104	10	10	1.41024e+06	1.29619e+06	1.04891e+06	1.26293e+06	1.06667e+06	826853	1.3792e+06	689753	2.47633e+06	1.11533e+06	1.46051e+06	2.69596e+06	1.71998e+06	1.009e+06	1.5009e+06	611134	552349	735241	1.54924e+06	1.23766e+06	1.17694e+06	2.1035e+06	673734	396934	1.21379e+06	916196	1.11616e+06	606044	652827	1.64096e+06	1.15866e+06	2.12531e+06	1.0232e+06
M266T335	[M+H]+	Acridine orange	0.381336	1.00019	0.998959	266.174	334.678	2.11381		C19315	Organoheterocyclic compounds	Quinolines and derivatives	Benzoquinolines	348.031	10	10	41225.9	99186.3	41116	77230.3	59741.5	48621	51355.9	52147.1	57305.4	73725.6	53852.6	81924.7	92233.6	63025.1	44992.7	60999.7	70879.1	81727.5	62311.5	64289.9	50085.4	89832.6	41022.4	61235.9	91746.2	91048.6	76775.3	38776.6	63793.6	57081.2	76648.5	96597.6	52953.5
M136T162_2	[M+H]+	Adenine	3.44262	1.12566	0.484257	136.061	161.696	0.528631	HMDB0000034	C00147	Organoheterocyclic compounds	Imidazopyrimidines	Purines and purine derivatives	182.131	10	10	8.83038e+06	3.98964e+06	2.16719e+06	2.56091e+06	3.71566e+06	2.23857e+06	3.06862e+06	2.23911e+06	709988	2.36028e+06	3.13456e+06	4.13051e+06	1.92077e+06	1.97109e+06	3.24366e+06	1.55134e+06	2.40683e+06	2.2084e+06	1.54368e+06	1.57845e+06	2.99693e+06	1.17837e+06	1.61013e+06	2.45355e+06	1.4724e+06	883824	1.73067e+06	2.59812e+06	1.95029e+06	1.74742e+06	2.3533e+06	3.06452e+06	4.02519e+06
M268T169	[M+H]+	Adenosine	3.27538	0.920837	0.853399	268.104	169.128	4.82776	HMDB0000050	C00212				183.872	10	10	1.66481e+06	174043	199087	1.25536e+06	86188.7	913425	529521	440254	174680	768073	914881	1.11062e+06	499247	2.72822e+06	1.01035e+06	557901	1.45036e+06	2.39957e+06	638699	2.81876e+06	1.20251e+06	558098	763141	806210	6.01921e+06	417088	389670	568412	294034	1.45869e+06	1.45179e+06	1.06997e+06	306009
M152T72	[M+H-CO]+	Adrenochrome	1.42671	1.0542	0.872061	152.081	72.088	4.39406	HMDB0012884					84.01	10	7	62970.7	35973.1	55631.4	137454	50568.2	383547	73734.2	225853	23459.8	85909.8	254615	76066.7	88393.5	185117	293065	190302	306871	144435	130115	67178.1	200870	38328.4	198778	295758	37837.1	55595.7	40406.3	222641	201548	92261.7	215326	143216	102931
M535T381	[M+H]+	Aerucyclamide a	0.0505063	0.985746	0.914137	535.221	381.367	0.588102			Organic acids and derivatives	Carboxylic acids and derivatives	Amino acids, peptides, and analogues	383.556	7	7	4996.7	3689.14	7854.21	6653.74	6182.08	6843.71	6532.8	7251.5	6511.62	5188.32	5188.58	10203.4	5622.92	4698.64	4521.63	5712.21	3502.36	6179.24	5895.64	3218.86	13514.9	6166.23	6893.34	5316.93	11043.5	4701.27	6885.88	6214.39	4609.04	4473.63	6684.37	7276.38	6262.26
M353T493	[M+H]+	Ajmalicine	0.888311	1.1207	0.33027	353.206	493.021	2.90745		C09024				497.786	10	10	74939.7	94809.6	109652	86699.5	153509	100493	50716.6	73564.5	70782.4	70029.5	59797.4	94836.4	75744.7	79814	66839	81708.1	79065.7	105684	69368.8	155774	96372.4	106766	81066.9	67411.1	123677	88131.2	106933	51265.1	57255.4	79156	53634.6	79300.8	73250.7
M90T348	[M+H]+	Alanine	1.22513	1.18146	0.526528	90.0542	348.378	4.0092	HMDB0000161	C00041	Organic acids and derivatives	Carboxylic acids and derivatives	Amino acids, peptides, and analogues	349.77	10	10	166914	108615	296421	88763.9	215854	187664	136822	136608	83586.4	96397.5	88050.2	69114.1	51985.7	151490	120234	147272	80999.9	62060.1	92604.6	172975	53245.9	109194	117568	23684.1	104762	31198.5	89102.9	152097	85239.3	104043	19231.6	105224	103021
M132T193	[M+H]+	Alanine betaine	0.612354	1.08456	0.619808	132.101	192.944	2.20034			Organic acids and derivatives	Carboxylic acids and derivatives	Amino acids, peptides, and analogues	199.454	10	10	69868	56978.7	125346	67412.4	67573.6	46971.1	52319.3	39751.4	53493.4	68387.4	79418.3	62223	52411.9	73499.2	66569.7	43574.1	45168.3	89107.2	59697.7	86937.2	51654.1	67638.2	51331.7	33945.9	137122	65901.6	53224.6	64638.3	37103.9	58147.6	50749.1	71932.1	34513.6
M237T233	[M+H]+	Ala-phe	0.387457	0.963249	0.853178	237.122	232.645	3.77859			Organic acids and derivatives	Carboxylic acids and derivatives	Amino acids, peptides, and analogues	235.381	10	10	27476.9	27840.7	50110.4	70686	56264.4	75038.2	23543.1	32518.5	24006.8	39952.7	41390.1	24280.1	26176.9	86678.7	38715.8	24754.8	33053.3	46210.1	54715.1	109387	30637.1	38443.1	30694.4	23733.2	64335.9	25057.5	37739.6	43510.7	22982.1	48507.1	43195	35129.5	24154.9
M187T93	[M+H]+	Ala-Pro	0.703014	0.917416	0.71951	187.107	93.052	0.857228	HMDB0028695		Organic acids and derivatives	Carboxylic acids and derivatives	Amino acids, peptides, and analogues	108.978	9	7	48851.9	19374.8	37349.4	57235.8	44877.5	64799.5	69927.3	142937	28386.3	81965.5	147767	37548.7	32732.6	99995	90461.3	49652.5	64538.7	69145.8	34057.3	97273.6	64135.8	33567.8	62913.7	53949.4	50381	36717.1	22640.1	73636.7	51216	47265.1	31494.4	51082.2	46160.6
M177T344	[M+H]+	Ala-Ser	0.144858	1.01064	0.968863	177.086	344.081	0.648445			Organic acids and derivatives	Carboxylic acids and derivatives	Amino acids, peptides, and analogues	346.638	10	10	8997.69	11205.8	15278.5	25477.8	9704.53	15235.9	10766	34587.7	33906.8	24115.6	18554.4	5906.91	12955.8	53449.8	20945.3	17974.1	23705.1	22621.6	15369.4	45413.3	27010.9	29242.2	11258.4	29146.3	9917.65	15514.2	16705.2	19132.4	17668.1	14860.1	14524.4	15174.9	11299.5
M305T443	[M+H]+	Ala-Ser-Lys	0.296297	0.805665	0.349077	305.181	442.51	0.580861			Organic acids and derivatives	Carboxylic acids and derivatives	Amino acids, peptides, and analogues	454.144	8	6	10691	9271.96	18109.4	25400.7	21577.3	21842.5	3939.52	20021.5	11269.2	7148.66	25664.1	13903.6	10795.5	29361.3	17539.7	8495.87	9513.65	5911.93	9445.41	30924.5	8643.17	19280.6	15220.6	11955.5	22401.3	3068.13	13142.2	22098	11686.8	8413.27	3066.81	27958.5	6251.75
M191T200	[M+H]+	Ala-Thr	0.394004	1.3217	0.491017	191.117	200.444	1.26184			Organic acids and derivatives	Carboxylic acids and derivatives	Amino acids, peptides, and analogues	211.748	6	6	15141.5	4502.08	37036.3	7754.26	9952.76	7265.05	6288.67	6998.73	8643.51	4307.32	6015.57	17380.8	1569.67	9249.6	11215.5	6111.78	8632.1	5313.58	7168.65	6234.09	5502.05	5846.87	10680.3	5822.81	4740.31	4604.03	15154.8	6782.93	5589.52	5599.81	7650.81	6809.56	4187.54
M317T397_2	[M+H]+	Ala-Val-Lys	0.369115	0.71873	0.0790699	317.217	396.82	1.30092			Organic acids and derivatives	Carboxylic acids and derivatives	Amino acids, peptides, and analogues	417.095	6	6	12473.4	26774.9	26367.4	27429.7	63203.9	31598.3	21980.2	25084.7	18064.6	13574.2	35342.6	24205.2	9517.73	43260.8	28372.3	20560	27062.5	31916.4	32021.1	85006.3	5863.82	51670.1	2762.9	19657.3	71704.3	13245.2	17649.2	26734.1	5595.16	23491.6	36000.2	31812.5	22920.9
M315T338	[M+H-CH2O2]+	Aldosterone	0.243464	0.974144	0.92786	315.19	338.009	1.96272		C01780	Lipids and lipid-like molecules	Steroids and steroid derivatives	Hydroxysteroids	341.914	10	9	7681.05	19927.8	12113.6	10295.7	15648.9	15207.6	9461.03	8894.96	12897.7	8858.82	5097.3	11053.8	11535.8	5414.86	3865.73	7949.12	12332.7	11044.9	6495.31	15745.2	5575.69	13102.6	3805.95	7027.56	12738.8	18791.2	21572.6	6139.83	14323.8	10904.8	17394.5	16278.1	15087.9
M417T32	[M+H]+	Alfentanyl	5.04498	0.8633	0.642574	417.252	32.3985	1.32135	HMDB0014940	C08005	Benzenoids	Benzene and substituted derivatives	Anilides	33.367	10	7	163637	131171	112857	878211	184728	2.42083e+06	1.30467e+06	1.21013e+06	436868	1.78565e+06	2.01034e+06	813034	1.08805e+06	1.50178e+06	1.65746e+06	1.18263e+06	2.24963e+06	1.55343e+06	1.24217e+06	524255	2.213e+06	888270	1.72411e+06	1.5226e+06	857943	954193	149216	2.16984e+06	1.25602e+06	1.49532e+06	2.4132e+06	889427	1.43934e+06
M515T32	[M+H]+	Alisol b acetate	6.76401	1.54516	0.375427	515.36	32.3985	5.17938			Lipids and lipid-like molecules	Prenol lipids	Triterpenoids	39.069	8	10	1.48883e+06	2.55985e+06	3.01882e+06	541908	2.25795e+06	64473.5	200605	67030	55431.1	419975	70584.1	1.10739e+06	552184	501772	88492.7	248409	40365.5	178706	205659	1.46519e+06	160879	1.72386e+06	71814.3	29379.9	2.2141e+06	1.19773e+06	2.35987e+06	45596.6	128623	679593	275182	1.05896e+06	407222
M159T183	[M+H]+	Allantoin	0.102656	0.900104	0.861068	159.05	182.668	4.16433	HMDB0000462	C01551	Organoheterocyclic compounds	Azoles	Imidazoles	192.854	8	5	1574.23	12322.6	6946.07	3204.42	1897.27	1187.99	19879.5	21730.6	24961.1	18511	5768.34	6518.66	8714.94	16183.8	93536.7	6031.86	3230.46	16231.4	1339.23	44996.1	1862.43	4824.3	33448.9	1217.88	8674.81	7700.27	5111.71	3639.29	10183.6	7840.43	10013.2	11329.4	6651.61
M243T292	[M+H-C4H10O]+	All-trans-4-hydroxyretinoic acid	0.33699	0.701515	0.411151	243.133	291.761	2.17151	HMDB0006254	C16677	Lipids and lipid-like molecules	Prenol lipids	Retinoids	292.618	8	5	339955	39708.4	71027.3	34961.9	63987.9	33489.8	30953.6	44134.7	62579.6	36734.1	31909.1	40765.7	26272.3	34357.5	48793.4	67137.3	36246	43764.4	32211.2	45176.1	28288.6	34069.6	63863.9	37424.3	38262.6	23645	29603.6	35421.8	29505.1	30405.9	30978.2	29375.8	23500.7
M190T382	[M+H]+	.alpha.-guanidinoglutaric acid	1.10616	1.19678	0.26043	190.106	382.385	0.787962			Organic acids and derivatives	Carboxylic acids and derivatives	Amino acids, peptides, and analogues	395.726	9	10	125782	182255	168963	164227	138505	88592.7	80059.7	84110.8	92671.9	139063	77999.8	72635.6	53511	123501	69308.6	80550.5	106324	77696.1	55440.7	85304.4	89539.8	91608.3	60458.8	67850.8	147619	65851.4	181622	78350.1	79682.5	124832	65114.2	130341	72557.4
M214T245	[M+H]+	(-)-.alpha.-kainic acid	0.268976	0.949872	0.762042	214.118	244.79	0.887495	HMDB0001431	C12819	Organic acids and derivatives	Carboxylic acids and derivatives	Amino acids, peptides, and analogues	257.219	10	9	15820.9	18864.5	26370	26185.4	1538.67	31792.3	31103.6	34597.5	24954.5	31963.3	38704.6	18552.4	35654.2	22937	45751.4	37628.8	31474.7	40667.1	26736.6	13734.7	38814.7	22563.8	34060.7	24128.2	12761.7	22667.8	21179.1	36524.3	23441.7	22357.1	35134.7	12707.7	20264.7
M818T224	[2M+H]+	.alpha.-muricholic acid	2.11379	1.21624	0.836749	817.579	224.261	5.93578		C17647	Lipids and lipid-like molecules	Steroids and steroid derivatives	Bile acids, alcohols and derivatives	235.472	10	10	7008.43	991669	8350.22	14677.6	112576	16457.1	29986.2	17814.9	140954	63233.1	23009.8	636489	255595	22336.6	29298.3	33215.8	18840	33756.7	31527.2	33211.5	70044.6	18425.5	27603.5	22383	29601.4	32860.7	14696.4	22880.1	49145	67487.2	152804	132691	9733.32
M490T32	[M+NH4]+	Alpha-tochopheryl acetate	5.41049	1.18849	0.201471	490.424	31.8945	1.8064	HMDB0034227		Lipids and lipid-like molecules	Prenol lipids	Quinone and hydroquinone lipids	46.977	10	10	7.02981e+06	2.97237e+06	7.03699e+06	7.42249e+06	6.88564e+06	7.5975e+06	4.2165e+06	9.1816e+06	6.27759e+06	8.74358e+06	6.44487e+06	3.93173e+06	2.51049e+06	6.42e+06	6.51343e+06	7.55979e+06	1.1526e+07	1.00193e+07	5.93645e+06	5.75431e+06	6.68969e+06	5.98298e+06	9.14137e+06	7.55108e+06	5.85064e+06	5.85033e+06	6.5893e+06	8.58422e+06	7.67313e+06	6.60736e+06	5.47378e+06	6.13855e+06	7.33038e+06
M276T144	[M+H]+	Ametoctradin	0.582972	1.07411	0.66991	276.231	144.178	1.11957						161.837	10	10	29683.9	54147.5	47242.1	40597.6	54654.7	16544.4	22014	26984.4	23106.7	21385.2	21879	31244.9	35910.2	42074.7	36136.7	22370	20884.2	26208.5	32743.7	31183.2	20432.3	40288.3	8528.52	31100.3	48580.8	48116.1	56037.7	6940.56	22805.4	21464.2	38364.1	42466.3	17621.9
M479T267	[2M+H]+	Aminoalbendazole sulfone	0.498298	0.999608	0.998942	479.164	266.67	3.30947		C16627				283.014	10	10	5462.03	8899.45	6023.07	37592.1	4878.9	65146.8	45762.3	79120.2	14245.5	51526.9	48175.2	37652.1	64948.8	42212.9	73800	70833.4	57423	49315	55975.6	26717.8	70469.2	21260.9	55982.6	104325	13503.7	85494.5	4275.14	46709.6	105138	43013.5	81970.6	31390.3	54947.4
M386T139	[M+H]+	Amisulpride n-oxide	1.38059	0.779508	0.487509	386.184	139.089	1.04793			Benzenoids	Benzene and substituted derivatives	Benzoic acids and derivatives	147.438	8	10	38836	174052	24061.8	27112.7	48213.6	18478.2	97502.7	69050	108884	36774.4	44371.9	149766	180919	28174.1	41644.2	38350.3	24395.1	27925	68425.6	43121.4	45685.4	18726.1	19808.2	34057.2	14170.8	79886.4	28341.6	26504.3	42905.1	51276.8	99449.7	51735.2	15296.6
M506T294	[M+H]+	Amprenavir	0.281062	0.912631	0.565261	506.223	293.991	2.45919	HMDB0014839	C08086	Benzenoids	Benzene and substituted derivatives	Benzenesulfonamides	308.748	9	3	5233.45	5759.49	6114.04	7026.02	1734.15	11946.2	11239.9	10799.7	6866.73	9435.06	11375.3	7094.87	10703.1	10104.6	9388.74	12758.7	11512.5	9245.98	9156.91	7159.93	12123.8	8069.63	2202.99	8493.77	12565.4	9780.96	4923.98	11932	9112.13	8926.12	13411.4	8476.3	7654.15
M480T28	[M+Na]+	Amygdalin	0.525019	0.776206	0.400911	480.167	28.011	4.5134	HMDB0035030	C08325	Organic oxygen compounds	Organooxygen compounds	Carbohydrates and carbohydrate conjugates	38.887	10	7	3596.6	3501.85	3635.67	14107.8	3487.41	20890.3	18423.3	20543.1	4103.73	21433.8	19738	29041.6	41647.4	12947.5	15317.2	23604.4	23546.6	18709.2	28716.5	9328.57	35594.8	10798.9	9307.92	25585.7	6032.99	19555.4	3453.93	23450.6	31294.7	24604.4	33733.5	16436.9	18028.5
M844T353	[M+H]+	Anabaenopeptin a	0.421023	0.736149	0.626863	844.425	352.561	0.366671			Organic acids and derivatives	Carboxylic acids and derivatives	Amino acids, peptides, and analogues	369.944	3	6	713.924	3938.61	2216.02	790.252	3377.56	3443.87	1472.6	2306.55	25323.7	3189.78	2351.26	2168.21	1293.09	1943.33	3318.52	3349.9	1103.23	3709.2	2041.16	3628.41	1795.54	2442.13	1479.99	1587.33	9823.9	5247.41	4805.11	3450.71	1661.19	2962.69	2776.62	5964.82	1106.68
M134T213	[M+H-CH3N]+	Anabasine	0.235561	0.941087	0.791727	134.095	212.864	2.91286	HMDB0004350	C06180				235.72	10	10	16082.7	3899.52	13288.8	11536.8	6548.25	11741.8	9745.72	10062.5	5661.38	8606.5	22495.2	10227.8	9115.67	11964.3	27954.7	17477.1	24411.5	15253	8934.63	9617.77	10712.9	10719.4	13353.7	12160.5	8987.47	9283.98	11263	22946.9	18746.5	8832.33	21869.9	10226.9	9417.24
M388T190	[M+H]+	Androst-5-en-17-one, 3-[2-(diethylamino)ethoxy]-, (3.beta.)-	0.25871	0.844009	0.321491	388.319	190.312	7.95949			Lipids and lipid-like molecules	Steroids and steroid derivatives	Androstane steroids	202.844	6	5	21372.2	5949.05	23872.4	20564	5894.7	7697.6	14749.4	18877.9	14765.6	13155.4	22510.2	24105.6	29997.3	20708.4	18078.5	13693.6	12863.8	9117.68	17705.5	25046.9	16996.7	15128.4	21886.4	11295.7	7923.38	16498.7	5483.25	9249.58	10343.1	11778.5	24716.8	24798.7	9800.77
M431T390	[M+H-2H2O]+	Androsterone glucuronide	0.0387591	0.816894	0.413682	431.248	390.009	5.8806	HMDB0002829	C11135	Lipids and lipid-like molecules	Steroids and steroid derivatives	Steroidal glycosides	403.378	6	5	6319.32	4882.23	15196.8	12014.2	18024.2	11593.1	6133.86	5200.89	8349.43	3380.45	10212.6	8757.07	8784.72	10646.9	5477.66	2194.59	1047.49	2866.01	8995.76	3823.65	6627.23	9165.29	4241.67	5827.06	7379.65	11421.7	5542.59	11100.6	4710.87	8491.4	10335.7	3993.27	3933.26
M455T226	[M+H-H2O]+	Anemosapogenin	0.286313	0.982018	0.942354	455.351	225.876	9.03596			Lipids and lipid-like molecules	Prenol lipids	Triterpenoids	235.007	5	5	13620.8	25291	18776.3	15408.8	46196.6	12883	5865.13	17834.2	13452.6	8068.79	14279.3	25472.9	15137.6	13753	15454.4	13819	14446.6	15426.8	13056.5	15592.2	10894.5	11607.8	8073.62	8585.45	21812.1	8304.23	28602.8	9929.9	8971.69	11823.3	6419.16	25621.4	11451.2
M94T261	[M+H]+	Aniline	0.513756	1.00356	0.981971	94.0642	260.752	7.8863	HMDB0003012	C00292	Benzenoids	Benzene and substituted derivatives	Aniline and substituted anilines	262.733	10	10	64905.4	14001	41429.8	45307.1	27684.6	36718.4	40226.9	37269.9	22773.5	49690.6	51209.9	25842.7	30648.7	60222.4	63573.2	33229.9	54808.9	66429.6	27643.6	43097.7	51960.9	32742.9	48680.7	38217.7	52086.2	38419.7	30457.3	42331.3	35645.9	52852.7	36419.6	33854.5	44429.9
M241T307	[M+H]+	Anserine	0.71431	0.651389	0.475715	241.154	307.487	1.91993	HMDB0000194	C01262	Organic acids and derivatives	Peptidomimetics	Hybrid peptides	308.934	10	10	97621.9	64415.4	34486.9	50876.6	82122.5	40464.3	110652	31873.2	29291.9	104080	98374.4	82452.7	71800.4	117596	540509	344868	50119	39458.7	45593.6	148581	40994.4	49045.7	85671.2	32148	54128.7	55771.5	25949.9	38942.9	59850.9	141289	34486.8	48381.1	67829.7
M587T56	[M+H]+	Anthranoyllycoctonine	0.166892	1.00615	0.984711	587.33	56.224	3.28243			Lipids and lipid-like molecules	Prenol lipids	Diterpenoids	70.371	4	3	7583.47	18273.6	11901.3	9045.83	12506.7	13533.9	21363.9	16973.9	12926.9	13363.2	25286.2	32338	50201.7	39836.1	9868.12	13057.8	17173.9	18550.9	16613.4	35632.7	14506.5	17634.1	10711.1	13971.1	47640	57018.1	12008.8	9962.77	15834.8	24780.7	18078.7	12703.2	8436.68
M476T427	[M+Na]+	Antibiotic k 252b	0.214332	0.993304	0.973206	476.139	427.097	0.489856			Organoheterocyclic compounds	Indoles and derivatives	Carbazoles	432.446	4	7	8127.08	11149.6	5867.58	3603.86	9146.38	3343.69	3120.88	1772.97	4992.11	3046.08	2342.9	4887.28	5908.02	4685.23	6286.05	3072.82	4073.27	4953.17	2088.69	8225.09	3570.58	4402.63	4761.37	3852.4	2414.49	6537.87	11278	1546.38	5632.28	3155.89	5399.48	6339.38	4664.7
M456T313	[M+H]+	Apafant	0.338332	0.722173	0.360181	456.112	313.378	0.370841						320.61	7	6	9928.09	3872.98	10328.4	4892.91	5483.13	4436.75	4080.01	4615.19	23202.3	3840.95	3137.8	5618.36	1662.88	2929.77	14348.2	4227.65	1892.11	4110.59	4412.54	11887.8	4309.54	2945.43	4526.06	3952	3576.67	3208.84	11571.5	3841.59	3607.88	4324.31	3906.95	4855.06	5039.43
M455T430	[M+Na]+	Apigenin 7-glucoside	0.124035	1.04631	0.877086	455.115	429.501	0.581606	HMDB0037340	C04608	Phenylpropanoids and polyketides	Flavonoids	Flavonoid glycosides	432.233	9	6	8181.58	7648.82	2963.33	4697.11	17519	5596.55	12930.5	7325.09	3908.93	9084.13	8055.44	5519.01	2511.45	15088	5445.28	118189	6270.89	4660.75	4532.51	7317.2	11113.8	2803.3	12010.8	3203.91	4012.48	3028.38	5177.68	2992.41	3071.39	4149.65	1428.69	6260.3	6916.71
M167T72	[M+H]+	Apocynin	0.875188	1.26617	0.236764	167.08	72.1135	5.58598		C11380	Organic oxygen compounds	Organooxygen compounds	Carbonyl compounds	74.676	7	8	114766	75345.2	114728	126724	104563	64087.7	97320.5	142579	130947	151376	109908	68407.4	62586.9	96806.8	101505	99862.1	75428.3	54241.4	79621.4	88031	78493.9	82855	64134.7	79170.7	75023.5	73382.1	73237.3	86137.4	75492.6	86016.3	156043	36544.9	82874.8
M540T264	[M+H]+	Apramycin	0.366094	1.1811	0.585394	540.279	263.815	0.36944		C01555	Organic oxygen compounds	Organooxygen compounds	Carbohydrates and carbohydrate conjugates	282.952	7	7	7097.73	5115.51	8541.37	20611.4	2618.22	16873.6	21191.8	12431.7	5064.86	34452.7	28524.8	29969.6	3986.08	10449.7	21937	9271.97	40987.8	12299.1	24059	16746.4	28037.1	21485.3	11406.2	43821.8	8849.91	7062.69	27659.8	20766.5	8523.69	11940.2	30534	22950.3	18070.2
M348T211	[M+H]+	Arachidonoyl ethanolamide	0.199633	0.931295	0.533723	348.288	210.523	5.4298	HMDB0004080	C11695	Organic nitrogen compounds	Organonitrogen compounds	Amines	212.771	8	10	21941.2	18486.8	17437.7	17737.5	20266.1	24918.8	17506.1	16465.1	11233.7	23116.9	19878.2	26147.1	31826.2	17491	22100.1	23247.6	22258.5	20195.6	21628.3	30139.3	25526.3	19697.6	22029.2	14807.7	29714.7	13387.6	22066.5	22149.9	12870.3	20950.7	21286.2	27430	22301.1
M332T149	[M+H]+	Arachidonoyl-n,n-dimethylamide	0.861285	0.633882	0.200974	332.314	148.621	0.186063			Lipids and lipid-like molecules	Fatty Acyls	Fatty amides	157.416	6	6	40318.8	98789.1	34134	5649.26	50181.6	28531.7	12891	6636.54	41014.7	11212.2	11243.1	108992	67242.1	3106.46	39222.6	33722	6491.9	4157.43	40023.4	9127.47	36021.9	8861.34	29220.6	8422.62	23489.3	12730	23290.4	23251.8	26730.7	39388.8	12549	32388.5	7677.58
M463T261	[M+H]+	Arachidonoylserotonin	0.709207	1.33318	0.244665	463.351	261.18	2.94582			Organoheterocyclic compounds	Indoles and derivatives	Tryptamines and derivatives	263.134	10	10	30245.3	32050.7	31462.7	14418.1	31385.8	7164.98	11691.4	8560.54	3647.88	15455.2	8580.99	26788.1	18630.4	15191.3	8865.92	13269.7	10618.5	13610.6	9904.55	34178.3	9547.53	22578.9	7661.15	10281.1	36157.7	21242.1	38537.7	5548.34	8901.98	15339.4	10711.2	16113.8	12474
M173T288	[M+H]+	Arcaine	0.346056	1.00554	0.983202	173.138	287.975	2.37093		C03047	Organic nitrogen compounds	Organonitrogen compounds	Guanidines	305.156	10	10	171649	59049.4	86810.4	89855.1	43055.6	59108.6	31262.9	111639	13067.8	24731.3	50065.8	44514.9	59474.2	83576.6	23032.5	72311.4	46291.2	115650	44484.1	55637.6	48410	34757.3	32203.9	34095.2	220589	21324.5	162725	66836.7	35173.8	64964.2	22681.2	165299	38383.4
M246T425	[M+H]+	Arg-Ala	0.908354	0.693183	0.189779	246.155	425.053	0.41847			Organic acids and derivatives	Carboxylic acids and derivatives	Amino acids, peptides, and analogues	431.569	9	9	97805.8	127834	75580.9	50542.3	109756	111498	32605.7	134399	55702.2	107104	123541	38246	36622.4	259086	49700.6	62338.5	101550	170556	127840	163230	88063.5	170416	70948.7	38464.9	281336	60339.2	45081.9	133925	52564.5	127248	58317.1	93977	60738.7
M509T277	[M+H]+	Argatroban	0.440244	0.953095	0.804681	509.276	276.722	2.67783		C04931	Organic acids and derivatives	Carboxylic acids and derivatives	Amino acids, peptides, and analogues	279.379	9	10	4068.61	19671.1	6019.41	26398.5	12277.4	19856.6	25766.5	7900.21	22412.3	30765.2	23567.6	49746.2	30717.5	12847.4	14129.3	14094.2	30728.5	15346.5	31137.6	19073.3	19825.8	25430.4	13126.4	63399.9	15464.8	15538.2	10189.7	17050.5	10537.2	51407.2	38685.7	23916	14619.6
M360T225	[M+H]+	Arg-Gly-Lys	0.189219	0.932988	0.762954	360.227	224.91	1.13997			Organic acids and derivatives	Carboxylic acids and derivatives	Amino acids, peptides, and analogues	239.311	6	7	24929.1	21326.8	22427.3	8161.92	29575.6	10527.3	9495.55	9550.07	7044.5	13261.4	8213.8	19084.3	6090.56	11153.4	11019.3	11769.8	8634.05	7626.63	7799.06	26902.8	11487.3	16338.4	8767.01	8012.97	29023.9	10168.5	21767.4	4510.27	7858.5	12730.6	10652.3	26395.4	6329.88
M175T548	[M+H]+	Arginine	0.892354	1.31318	0.621171	175.118	548.401	0.705744	HMDB0000517	C00062	Organic acids and derivatives	Carboxylic acids and derivatives	Amino acids, peptides, and analogues	562.498	9	7	79130.2	97652.3	68350	295715	22468	1.02722e+06	512391	67791.8	117680	34125.1	252088	55629.6	25886	560639	76445.3	82665.1	120339	79619.3	86997.2	142371	145629	141643	128079	48243.6	156174	568170	160537	24901.8	66299.2	292114	27386.9	165940	43599.4
M291T235	[M+H]+	Argininosuccinic acid	0.259619	1.08986	0.667123	291.144	235.236	3.48942	HMDB0000052	C03406	Organic acids and derivatives	Carboxylic acids and derivatives	Amino acids, peptides, and analogues	236.589	6	8	10101.9	9952.16	3972.86	26043.4	9733.42	41304	21958.7	26937.2	19220.6	23801.9	55953.4	24606	19302.1	23124.6	33198.4	40596.4	27273	26381.5	18551.8	93737	26201	21003.4	25610.5	25000	17438.3	19183	11566.3	28597	19999.7	32166	23756.6	16732	21180.6
M272T459	[M+H]+	Arg-Pro	0.976552	0.989946	0.972827	272.17	458.94	4.00465			Organic acids and derivatives	Carboxylic acids and derivatives	Amino acids, peptides, and analogues	464.269	10	6	187210	141121	211141	224238	361242	502977	140386	141493	66737.7	128617	217799	93399	41281.8	272647	138002	157089	197316	309774	61630	364579	198020	150684	249045	66363.1	842137	60406.9	88961.6	221143	69913.4	245043	104244	304618	204775
M262T429	[M+H]+	Arg-Ser	0.387813	0.745437	0.533507	262.15	429.246	2.21613			Organic acids and derivatives	Carboxylic acids and derivatives	Amino acids, peptides, and analogues	450.128	7	8	21896.9	71295.4	67742.4	21804.8	88299.9	20617.5	3655.53	220405	25147.1	71227.2	68891.1	6582.12	6921.48	117700	12048.5	40597.7	19943.4	83498.3	38958	55839.6	15565.2	77755.2	44712.7	14102.4	175808	13486.8	44395	8369.66	19922	18911.7	17982.3	52487.2	2751.41
M448T26	[M+H]+	Aripiprazole	0.324538	0.823062	0.528443	448.141	26.0905	0.744664	HMDB0005042	C12564	Organoheterocyclic compounds	Diazinanes	Piperazines	31.631	10	8	2850.88	2706.43	2541.82	12645.8	3659.12	9228.53	18121.5	7282.03	4718.37	14950.3	23771.4	18953.7	27443.9	10525	16251.6	12413.8	16597.6	7486.57	29250.7	6797.77	22078.2	11159.9	15152.7	8476.78	2449.82	18024.6	1270.55	14796	20179.2	19531.8	33108.3	4511.24	8396.34
M283T405	[M+H]+	Artemisinin	0.447111	0.420182	0.249128	283.164	405.172	1.64614		C09538	Lipids and lipid-like molecules	Prenol lipids	Terpene lactones	416.413	7	8	68783.9	7503.77	8812.57	10156.5	9557.4	11348.6	7703.12	9679.62	25748.2	13886.7	13860.5	9488.27	7449.29	10194.6	19276.4	9610.15	8974.84	8772.37	11552.1	8480.2	9473.63	5108.81	11917.6	7871.09	7173.97	9038.49	8187.19	6879.27	7788.78	9583.15	11524.3	8665.03	9247.94
M169T312	[M+H-CO]+	Asarylaldehyde	0.157589	1.12148	0.616967	169.096	311.824	6.37907	HMDB0029648		Benzenoids	Benzene and substituted derivatives	Benzoyl derivatives	314.575	9	10	68241.3	23893.8	18782.7	28063.6	27965.7	38578.4	62776.1	20935.4	25810.5	41293.5	36259.8	68924.1	40253.5	25694.6	44514.7	47655.3	41451.4	65831.5	29255.1	20636.7	28652.4	32434.7	32249.3	41298	17010	37635.1	18927.5	34118.9	27790.9	31526.6	39705.3	28211.5	26782.4
M289T412	[M+H]+	Asn-Arg	0.189115	0.850021	0.4591	289.16	411.551	6.40442			Organic acids and derivatives	Carboxylic acids and derivatives	Amino acids, peptides, and analogues	413.419	4	3	35051.7	6148.01	46331.3	19523	25471	26850.1	11653	25444.9	15051.4	18028.3	25379.2	11771.3	17592.3	19811.7	38257.2	16010.9	18517.2	19539.7	16991	34024.6	17154.5	17026	21503.8	10997.9	65809.7	7398.08	58909.9	16502.6	15850.2	17271.6	21397.3	36010.2	14450.3
M402T368	[M+H]+	Asn-Leu-Arg	0.419963	0.95752	0.909618	402.244	367.937	1.464			Organic acids and derivatives	Carboxylic acids and derivatives	Amino acids, peptides, and analogues	385.617	7	7	3807.28	46908.9	38257	14949.9	57571.9	9926.43	6225.13	13303.3	8578.2	14787.6	9832.68	6470.78	7070.79	19771.2	6936.51	5242.6	10547.6	18819.8	14002.3	43721.6	6988.28	20342.3	5978.74	7159.97	72501.1	3733.89	23808.6	15843.6	6264.71	14977.5	7124.82	21293.2	7684.05
M436T265	[M+H]+	Asn-Phe-Arg	0.569361	1.04144	0.79287	436.221	264.546	0.318438			Organic acids and derivatives	Carboxylic acids and derivatives	Amino acids, peptides, and analogues	266.67	10	10	23719.6	26081.6	27654.9	65638.4	29105	60281.4	56870.2	67556.9	29688.2	55346.5	55921.1	35739	36543.1	50762.7	54198.6	54280.5	66765.5	63298.5	68401.6	54604.7	60018.8	46550.4	46779.8	63766.9	48902.4	46901.1	27347.6	68522.9	48846.3	52631.5	55109	56635.2	55617.4
M388T395	[M+H]+	Asn-Val-Arg	0.615205	0.979968	0.963644	388.253	395.236	5.15508			Organic acids and derivatives	Carboxylic acids and derivatives	Amino acids, peptides, and analogues	400.725	8	9	12651.7	31075.7	122772	31154.4	110262	22944.7	5449.63	20651.8	22489.2	41024.6	22981.3	6623.52	4228.58	40535.3	15103.6	7659.4	17651.5	28176.1	17405.7	89350.5	7098.64	24279.1	3516.44	3934.08	178021	8207.21	70717.5	23697.2	4736.61	16816.3	6453.95	30586.4	5982.9
M272T142	[M+H-H2O]+	Asp-Arg	0.653944	0.944633	0.801173	272.162	142.288	1.03354	HMDB0014712	C01479				156.416	10	8	48494	23099.6	100362	66499.6	35966.1	78626.8	66057.8	112684	16367	111759	85521.1	53543.3	65766.1	55744	123360	76372.7	98307.6	58647.5	72510.9	60621.9	97197.3	40129.1	65359.5	78941	41417.4	63363.5	47514.4	81210.2	87100.6	81091.5	111655	47053.7	58873
M295T346	[M+H]+	Aspartame	0.920569	1.81164	0.15866	295.128	346.012	0.584405		C11045				353.678	8	10	21882.1	61536	43256.1	154516	36680.8	9965.59	9132.59	20078.2	12340.1	38820.1	13755	25766.2	29370.8	13171.7	28968.4	30485.2	31629.1	34975.8	16887	19474.7	29542.9	34864.6	53880.5	34602.2	29245.2	23350.4	21278.8	125965	17336.2	15717.1	29011	21054.7	45438.2
M189T388	[M+2H]2+	Asp-Asp-Lys	1.61465	1.07737	0.928625	189.097	388.127	6.34272			Organic acids and derivatives	Carboxylic acids and derivatives	Amino acids, peptides, and analogues	390.359	10	9	4.53631e+06	5757.23	1.29746e+06	71615.6	8860.5	157696	73415.1	134741	14936.1	150064	121390	46214.2	122772	97003.2	128253	104564	145840	101029	73033.5	46039.2	99709.9	50171.3	146629	144569	34214.2	109023	2.00292e+06	68721.7	124690	72823.3	191941	66738.5	102940
M393T301	[M+H]+	Asp-Cys-Arg	0.235092	1.07196	0.679383	393.173	301.087	3.43248			Organic acids and derivatives	Carboxylic acids and derivatives	Amino acids, peptides, and analogues	310.557	10	9	8763.28	21837.6	16556.5	31209.2	31851.6	24164.1	10808	39685.6	12336.8	22469.8	16403.7	106296	10010.1	25933.1	22393.1	21622	25478.9	28701.8	21038.2	20585.2	27376.2	13629.3	16934.7	18754.7	30536.1	10200.3	8935.31	26045.9	23300.6	18400.8	16777.9	22877.5	17797.4
M437T287	[M+H]+	Asp-Phe-Arg	0.65691	0.637868	0.0395003	437.201	286.587	4.91133			Organic acids and derivatives	Carboxylic acids and derivatives	Amino acids, peptides, and analogues	288.276	8	7	11357.9	9703.74	15119	10614.1	13863.9	5624.51	8326.95	12947.8	33820.6	5809.65	14651.6	19474.7	3854.33	13021.9	11742	15452.1	11955.9	16431.9	13656.2	17343.6	6798.89	18731	5494.72	10175.9	31853.9	7037.38	8864.77	14547.3	10639.6	21310.1	15796.4	23051.6	12353.2
M387T412	[M+H]+	Asp-Pro-Arg	0.412012	1.2578	0.321415	387.196	411.884	4.7278			Organic acids and derivatives	Carboxylic acids and derivatives	Amino acids, peptides, and analogues	441.843	4	8	43428.9	9822.8	17124.1	13324.6	23702.8	33016.8	18258.9	16328.8	7777.56	24111.2	20941.5	8598.37	3525.75	6750.4	18461.8	16783.1	28969.6	20528.2	19439.1	8536.09	17003.9	14896.3	10701	13967.5	5049.78	14289.4	10916.2	17961.6	22103.4	16445.2	23450.8	4110.07	17208.6
M367T353	[M+H]+	Atovaquone	0.46846	0.957244	0.818593	367.119	353.314	2.25419	HMDB0015249	C06835	Benzenoids	Naphthalenes	Naphthoquinones	376.921	10	10	17970.5	84888.7	10581.2	53018	37481.8	47198.8	35086.7	77797.1	52090	46441.1	30429.9	51755.7	43016.8	28009.2	37868.2	62725.2	30901.1	38584.8	50375.2	29396.1	68517.9	28005.2	34805.6	54319.3	18227.4	76730.6	42635.4	27703.6	80768.4	49838.9	99509.9	52339.9	24124.5
M170T40	[M+H]+	Atrazine desethyl-2-hydroxy	0.184943	1.03839	0.809025	170.117	40.176	2.78054			Organoheterocyclic compounds	Triazines	1,3,5-triazines	50.16	10	10	45495.1	29427	21884.9	29075.2	43345.9	34800.6	39140.6	62525.2	29511.8	67722.2	32844.2	40998.7	44504.6	45671.7	29564.6	52127.2	27427.8	53141.9	27402.6	49590.1	26461	33386.7	41679.7	40796.2	24347.8	47047.4	38067.6	46350.1	41501.3	51986.8	43133.4	29142.3	20711.4
M619T25	[M+H-C2H4O2]+	Auranofin	0.239902	1.03672	0.913371	619.101	25.1305	1.61087	HMDB0015130	C06836	Organic acids and derivatives	Carboxylic acids and derivatives	Tetracarboxylic acids and derivatives	26.637	10	7	786.148	331.654	414.805	9512.09	374.675	7421.9	6480.43	7692.59	687.915	7200.08	4727.57	2413.21	3277.27	5631.62	3831.85	4768.72	4202.6	7758.71	5107.49	2811.6	7001.96	4489.43	5998.09	2958.35	1111.62	4524.69	797.573	5890.62	6213.44	3625.08	5428.22	5078.01	4232.81
M311T162	[M+H]+	Avobenzone	0.424579	1.51795	0.164059	311.175	162.151	3.44423			Phenylpropanoids and polyketides	Linear 1,3-diarylpropanoids	Chalcones and dihydrochalcones	170.173	5	9	78941.8	60442.3	15197.7	164704	10623.4	57132.8	20959.6	65475	52483.4	93738.9	134550	16213.1	50282.1	30239	53257.9	39134.1	132178	166254	35471.9	151708	40878.4	20636	153753	92276.2	16605.7	110249	14404.3	31745.4	39172.5	87383.4	272147	131469	38903.2
M327T34	[M+H]+	Avocadyne acetate	1.11311	1.1334	0.568985	327.252	33.789	0.47217	HMDB0031048		Lipids and lipid-like molecules	Fatty Acyls	Fatty alcohols	48.392	10	10	59711.8	39179.7	77017.9	193735	60034.1	384384	171621	275271	116943	148770	314295	124848	119879	157795	240864	283232	232637	190642	148397	173075	328738	223716	520130	220460	108856	176292	147361	306989	351056	284712	201582	227840	220072
M753T220	[M+H]+	Axinastatin 1	0.753529	0.708929	0.30026	753.422	220.441	3.1074			Organic acids and derivatives	Carboxylic acids and derivatives	Amino acids, peptides, and analogues	226.1	5	7	6648.76	20441	3255.64	8294.44	10520.3	8629.77	13973.9	11899.9	43091.4	8159.05	8411.64	33848.8	25586.3	6448.15	9416.86	6413.59	6782.91	8495.11	11268.8	7181.94	8514.07	5797.46	7236.56	7564.39	6929.86	15577.7	4265.26	8543.62	7592.58	9025.01	25180.9	10333	5974.99
M313T303	[M+H]+	Baicalein trimethyl ether	0.301782	0.942536	0.636678	313.106	302.618	3.10359	HMDB0128592	C10024	Phenylpropanoids and polyketides	Flavonoids	O-methylated flavonoids	304.268	8	9	14224.9	13581.3	15031.7	12693	15326.3	16434	16995.1	15499.7	25274.7	23290.2	21804.5	14766.7	19468.1	14786.5	26504.7	16161	16390.2	17807.1	13054.1	27125.7	20518.1	11668.3	15993.3	23155.8	12097.7	25812.3	9461.62	11864.5	21827.7	13798.6	24151.2	14273.8	12666.7
M669T437	[M+H]+	Becatecarin	0.35622	1.08753	0.823093	669.182	437.42	0.0945413			Organoheterocyclic compounds	Indoles and derivatives	Carbazoles	440.97	10	9	24251.7	7598	6895.73	22888.9	6930.56	54103	18062.2	20133.4	6630.79	44067.9	22339.1	15284.6	6752.3	13844.4	28332.6	20604.7	19861	36809	12310.6	27962.5	34753.9	18584.9	13978.5	6606.23	18614.7	6603.99	9975.26	33007.4	11281.2	24987.2	5667.49	12396.8	6623.74
M465T310	[M+H]+	Beclomethasone 21-propionate	0.212357	1.12739	0.577211	465.194	310.445	4.9092			Lipids and lipid-like molecules	Steroids and steroid derivatives	Pregnane steroids	312.988	7	7	5236.03	7931.21	8174.98	11159.4	10056.7	32664.1	9047.65	17369.6	9861.31	10502.1	13100.4	4803.56	9224.94	14401.5	10801	12499.1	18253.3	23857.5	17646	15648.2	13925.2	14357.2	19816.8	12681.6	16133.3	9244.18	10137.2	16194.4	7566.52	11890.2	13965.2	11497.4	12814.6
M348T377	[M+Na]+	Benalaxyl	0.991818	0.893726	0.670293	348.175	376.687	0.446169		C10929	Organic acids and derivatives	Carboxylic acids and derivatives	Amino acids, peptides, and analogues	380.578	10	10	39738.4	128894	55176.1	52124.7	123449	21647.9	40506.2	77669.3	101915	33449.4	76170.9	35243.6	110986	53750	49498.6	21345.5	37362.7	26244.2	107769	106141	28870.4	59147.1	52034.7	37525.4	54136.5	32166.5	83235	21600.4	30383.5	23633.5	112768	58424	24425.9
M167T130_2	[M+H-C2H3NO]+	Bendiocarb	0.928249	0.877397	0.53104	167.092	129.879	2.0227		C14433				137.185	10	10	229651	140921	491305	579333	522107	387818	833481	439938	671363	529549	597829	339775	278187	775060	944989	407490	431351	447636	273389	760158	319734	264713	502566	336787	283646	187633	518066	263955	266415	272971	320190	382081	361210
M304T128	[M]+	Benzalkonium chloride (c12)	1.13685	1.11988	0.824798	304.299	127.748	3.73672		C06523	Benzenoids	Benzene and substituted derivatives	Phenylmethylamines	135.408	10	9	350203	112561	97500.1	276604	148130	351679	307721	355249	759684	346390	580386	268280	481438	496785	513099	339095	374079	275256	420174	238401	392261	215385	317570	382799	194605	293561	202162	286059	271715	259684	424502	250030	275996
M122T49	[M+H]+	Benzamide	0.319237	0.638809	0.287484	122.059	49.12	2.71729	HMDB0004461	C09815	Benzenoids	Benzene and substituted derivatives	Benzoic acids and derivatives	83.03	6	9	51605.9	12802.8	26711	9250.26	16989.6	14230.6	30518.2	17144.8	9586.05	17065.6	15892.2	12779.1	14321.4	18078.4	99898.4	17377.2	19876.3	14571.8	14147.3	27105.6	8366.05	11827.2	19099.9	8223.85	10606.5	10801.7	14177.7	12948.3	9607.87	11607.8	13331.4	10585.4	14253.1
M479T611	[M+H]+	Benzamide, 2-[(2-chloro-4-iodophenyl)amino]-n-(cyclopropylmethoxy)-3,4-difluoro-	0.0626822	0.943643	0.848652	478.991	610.552	5.86826			Benzenoids	Benzene and substituted derivatives	Benzoic acids and derivatives	621.076	9	10	4754.52	2753.44	2095.25	3037	1809.11	4699.08	2111.99	5056.41	3346.49	6293.07	2805.76	4360.79	2557.31	8556.26	1786.57	1989.75	2378.23	14635.5	5343.17	2424.58	2355.99	2175.6	1606.02	4986.23	1858	1397.19	3772.61	2057.3	3777.42	4588.27	995.044	1996.21	1468.73
M625T345	[M+H]+	Benzamide, n-[2-(dimethylamino)ethyl]-n-methyl-4-[[[[4-[4-(4-morpholinyl)-7-(2,2,2-trifluoroethyl)-7h-pyrrolo[2,3-d]pyrimidin-2-yl]phenyl]amino]carbonyl]amino]-	0.0820488	0.940291	0.772001	625.271	345.317	8.45899			Benzenoids	Benzene and substituted derivatives	N-phenylureas	346.986	9	3	2234.04	4255.79	1454.67	5412.82	4440.7	11090.5	1990.33	6834.68	4834.72	1742.31	2407.85	5040.6	4085.76	4527.13	5213.29	4320.85	1806.21	6294.39	6203.57	5174.55	5290.29	3051.44	3773.39	2576.74	6499.82	3092.97	3516.2	11958.8	2499.24	2397.54	6523.17	5995.34	4495.28
M464T247	[M+H]+	Benzamide, n-[5-[2-(3,5-dimethoxyphenyl)ethyl]-1h-pyrazol-3-yl]-4-[(3r,5s)-3,5-dimethyl-1-piperazinyl]-, rel-	0.532126	0.895665	0.675489	464.25	247.021	0.41991			Organoheterocyclic compounds	Diazinanes	Piperazines	252.352	9	10	12178.5	18966	13818.8	37989.2	18599.1	46342.1	26435.8	23769.1	10748.6	29979	82438.1	44505.6	13730.7	21974.6	22024.3	40907.6	28676	26656.2	57644.9	31334.6	49552.3	25274.3	30376.2	49472.5	32434.9	12934.3	16267	86524.1	32770.7	100497	16655.6	38053.7	22721.5
M567T302	[M+Na]+	Benzeneacetamide, 4-(4,9-diethoxy-1,3-dihydro-1-oxo-2h-benz[f]isoindol-2-yl)-n-(phenylsulfonyl)-	0.20261	1.52759	0.0435907	567.152	302.389	0.304847			Organoheterocyclic compounds	Isoindoles and derivatives	Isoindolines	314.245	6	7	969.244	5093.58	5265.53	8020.61	3075.1	14184.1	4553.71	5567.9	6413.05	7248.28	3231.81	5265.03	5318.74	5658.51	1634.78	10301.5	7324.39	9478.98	7759.13	4028.58	7625.65	6695.34	7436.86	5617.6	11358	5726.5	4367.64	17546.2	1919.08	3874.2	7511.63	6526.04	8262.37
M464T382	[M+H]+	Benzeneacetamide, n-[(1s)-2-[[(7s)-6,7-dihydro-5-methyl-6-oxo-5h-dibenz[b,d]azepin-7-yl]amino]-1-methyl-2-oxoethyl]-3,5-difluoro-	0.483542	1.46948	0.160877	464.197	381.53	0.654106			Organic acids and derivatives	Carboxylic acids and derivatives	Amino acids, peptides, and analogues	385.483	9	8	8952.6	9012.8	15257.6	41779.9	7903.99	12897.7	9807.19	32095.9	9807.21	13118.5	19334.9	12780	6254.3	14503.4	12560.1	14217.5	14049.4	17021.5	7951.74	13539.1	18561.1	9800.94	11228	13143.9	12812.1	6800.41	14879	14968.7	8267.36	23096.2	5116.23	13702.3	10705.1
M582T380	[M+H]+	Benzeneacetic acid, 3-[3-[[[2-chloro-3-(trifluoromethyl)phenyl]methyl](2,2-diphenylethyl)amino]propoxy]-	0.855979	0.977486	0.93222	582.212	380.211	1.35022		C15631	Benzenoids	Benzene and substituted derivatives	Diphenylmethanes	383.293	10	10	7409.27	20930.9	8460.54	98408.6	10081.5	108569	74909.6	101411	48586.6	108717	81856.5	52433.6	114615	75445.6	80464	72127.7	135259	110242	110553	44958.8	103581	82193.8	77073	92279.3	46649.3	72999.7	10998.1	89841.2	114115	91476.3	142441	65321.4	79122.9
M254T338	[M+H]+	Benzeneethanamine, 3,5-dimethoxy-.alpha.-methyl-4-propoxy-	0.247869	0.821826	0.277042	254.16	337.804	0.545229			Benzenoids	Benzene and substituted derivatives	Phenethylamines	352.14	2	5	27366.9	26167.9	39018	30272.7	81183.2	32171.6	26198.8	36907.9	24139.1	43117.7	50499.1	27175	18231.6	41058.9	21440.3	39382	41025.5	43806.5	14311.1	31919	35048.9	44803.2	34406.2	45462.4	45616.2	30269.5	22602.7	27818	28895.7	30987.3	24538.8	39403.1	26469.7
M336T113	[M+H]+	Benzenemethanol, .alpha.-pentyl-3-(2-quinolinylmethoxy)-	0.498855	1.27372	0.169389	336.217	112.681	2.9455						118.136	8	7	30938	66383.6	32813.6	50534.4	18442.2	47383.4	76826.8	94628.8	34587.1	57838.9	89334.1	102181	60365.8	51748.8	93126.1	76983.2	77795.6	56407.4	79716.6	61036.2	173167	78257.2	48851.8	56907.3	43605.8	85993.3	34321.3	69428.8	78004.5	81447	187434	43712.4	110142
M525T349	[M+Na]+	Benzenepropanoic acid, 5-(3-carboxybenzoyl)-2-[[(5e)-6-(4-methoxyphenyl)-5-hexen-1-yl]oxy]-	0.204777	1.03936	0.880649	525.192	349.029	3.01525			Benzenoids	Benzene and substituted derivatives	Benzophenones	350.69	4	8	6653.21	7674.72	12563.4	4138.14	12058	5163.28	2230.45	4662.97	6458.21	5126.99	4335.38	5019.75	2833.41	3690.78	3244.54	3378.9	2665.81	7622.22	4517.78	4147.94	4733.33	4229.59	1645.66	3219.42	8435.91	4599.28	10426.8	4059.68	4754.61	5305.03	3423.73	8780.36	1560
M235T223	[M+H]+	Benzyl 4-amino-1-piperidinecarboxylate	0.805265	0.862338	0.405385	235.143	223.153	0.367927			Benzenoids	Benzene and substituted derivatives	Benzyloxycarbonyls	224.729	10	9	23724	18285.6	25695.7	62897.7	22363.1	60317.3	43230.3	70712.5	51037.1	52372.6	70402.3	32598.1	54076.7	44997	78241.4	42876	77833.7	46685.2	66043.6	28285.8	49633.2	38630.9	59265.6	70164.8	20214.3	46041.6	25028.4	52392.3	51355.4	46666.9	61286.8	41513	48407.8
M91T184	[M+H-H2O]+	Benzyl alcohol	0.435022	0.512024	0.472076	91.0535	183.808	8.10324	HMDB0003119	C00556	Benzenoids	Benzene and substituted derivatives	Benzyl alcohols	191.232	6	7	8827.71	7577.46	41104.3	16766.9	24805.9	5906.12	43492	8058.7	15335.8	24898.9	12016.6	19929.4	6014.46	17530.1	272855	8270.95	15856.8	7118.06	5711.69	63280.4	7667.97	13319.6	29179.9	7430.27	8346.6	5288.34	6107.9	8967.97	5534.93	6408.24	8335.82	8327.82	11199.9
M335T625	[M+Na]+	Benzyl butyl phthalate	0.368628	1.42082	0.114569	335.111	625.298	2.57415		C14211	Benzenoids	Benzene and substituted derivatives	Benzoic acids and derivatives	635.633	8	8	7675.83	13719.4	9422.08	10547.9	8091.93	13625.4	44477.9	27423.1	13545.1	22928.5	11735.2	7373.6	16049.9	9284.51	5205.86	10004	15427.7	5177.57	14090.4	16397.5	32985.5	12352.1	5817.75	9267.17	8368.5	9215.33	23266.8	14155.2	10988	7827.95	8925.24	4752.51	7623.41
M339T406	[M+H]+	Bergamotin	0.310304	0.920352	0.726258	339.155	406.003	5.00361		C22152	Lipids and lipid-like molecules	Prenol lipids	Terpene lactones	419.024	4	6	16545.5	12481.1	9998.33	6647.89	17608.4	2492.31	9632.08	11700.3	19646.5	10395.2	4545.16	4268.58	12417.4	6142.43	12350.7	8632.16	10482.4	11213	9971.99	8039.68	9937.35	10838.2	7003.55	7998.57	9567	10164.8	22186.7	9309.79	9473.77	9712.01	2681.46	9073.06	9466.99
M390T292	[M+H]+	.beta.-alanine, n-[2-(3-pyridinyl)-6-(1,2,4,5-tetrahydro-3h-3-benzazepin-3-yl)-4-pyrimidinyl]-	0.548558	0.97635	0.920441	390.176	291.726	0.395832			Organoheterocyclic compounds	Diazines	Pyrimidines and pyrimidine derivatives	305.655	10	8	7906.12	7300.88	4544.43	35429.1	12038.3	44679.7	28545	38483.8	8071.67	38993	35933.3	25384.4	23402.3	32994.5	45542.7	31499.2	37802.6	32266.4	25857.3	20963	32831.6	16658.9	39321.5	31598.7	15180.4	16999.8	3337.31	31020.3	27673.9	21770.5	36087.3	19976.3	25570.5
M137T203	[M+H-C4H8]+	.beta.-damascone	0.370525	0.973633	0.805805	137.106	202.532	0.156267	HMDB0032541		Organic oxygen compounds	Organooxygen compounds	Carbonyl compounds	206.414	10	9	41838.5	18008.1	23328.6	33883.3	23416.2	30103.4	25130.4	30454.9	19044.2	35951.9	32130.8	27848.4	30100.2	38646.2	43532.9	27868.1	35576	32445.8	23620.2	29188.4	31259.7	21742.9	35346.8	29630.6	29987.3	25471.5	22210.8	31151.8	24642.2	26197.4	35755.3	33441.5	43727.4
M371T243	[M+H-C4H14O3]+	.beta.-ecdysone	0.384472	1.05995	0.814599	371.202	243.321	7.79231	HMDB0030180	C02633	Lipids and lipid-like molecules	Steroids and steroid derivatives	Bile acids, alcohols and derivatives	255.58	10	9	58355.9	44403.2	31406.9	17398.5	26012.8	107508	31183.4	40171.9	48776.8	71726.8	32087	77225.3	50461.2	41702.1	35308	71459.7	93251.9	38791.7	36099.2	29867.5	50567.3	80086.4	60823.9	23952.6	28060.1	34147.3	16885.6	38615.2	31573.5	63638.1	75419.1	28337.7	32542.2
M118T275_2	[M+H]+	Betaine	4.27235	0.9153	0.862006	118.086	274.613	0.141816	HMDB0000043	C00719	Organic acids and derivatives	Carboxylic acids and derivatives	Amino acids, peptides, and analogues	287.128	10	10	1.61068e+07	1.51519e+06	1.07948e+07	3.6248e+06	2.21837e+06	865723	1.02238e+06	1.01158e+06	1.04985e+07	1.55142e+06	1.25627e+06	731865	430504	1.73091e+06	3.16666e+06	1.06908e+06	748388	924787	589294	2.33681e+06	1.50251e+06	751430	2.3268e+06	1.48221e+06	1.38557e+06	385300	7.41375e+06	1.31162e+06	771569	1.05658e+06	403318	2.56792e+06	1.85671e+06
M397T69	[M+H-H2O]+	.beta.-sitosterol	0.657283	0.912698	0.380161	397.381	68.657	4.27845	HMDB0000852	C01753	Lipids and lipid-like molecules	Steroids and steroid derivatives	Stigmastanes and derivatives	71.086	10	10	521193	681494	646008	428599	594523	599867	417380	295859	358876	391803	428770	413298	422231	526221	479669	481329	474348	284689	426193	284600	437086	600597	401166	497968	348611	394490	304804	611364	535742	559220	242729	662363	431183
M151T48	[M+H-C19H32]+	.beta.-tocotrienol	1.40022	1.2863	0.571298	151.086	48.392	4.01321		C14154	Lipids and lipid-like molecules	Prenol lipids	Quinone and hydroquinone lipids	49.401	7	8	309477	39236.4	308006	49925.8	186035	109064	39731.3	35218.8	73292.1	24664.5	36643.8	35543.2	72133.9	23431	52548.1	31798	32354.5	39297.5	119595	39581.8	76412	66629.5	157913	20840.5	17740.8	74009.2	241089	19040.6	76319.9	8964	150453	29038.2	26661.7
M439T132	[M+H-H2O]+	Betulinic acid	0.41282	0.869993	0.301558	439.37	131.505	2.07221	HMDB0030094	C08619	Lipids and lipid-like molecules	Prenol lipids	Triterpenoids	138.045	7	6	29201.4	30955.2	41434.6	35426.8	23754.1	26706.5	23558.2	37697.6	40579	28419.5	34914.9	67661.7	33603.2	24165.5	31852.3	28062.5	24143.7	24281.7	28207.9	10021.6	31684	35559.8	26096.6	24912.4	42550.7	35299.7	98097.8	32551.5	30124.6	45798.2	43898.6	50383.7	19481
M453T215	[M+H-H2O]+	Betulinic acid methyl ester	0.656942	1.18794	0.619558	453.366	215.113	2.12137			Lipids and lipid-like molecules	Prenol lipids	Triterpenoids	216.989	3	8	28516.7	54801.2	31267.3	9041.01	40233.3	5397.08	9725.25	5507.22	4549.6	9165.41	6639.01	25835.7	22030.9	18218	7863.92	10176.3	6034.03	10826.1	9920.95	31980.7	8291.78	25320.3	5610.57	6564.61	31799.9	22972.2	48036.5	5857.5	8674.81	14594.7	11276.9	23401.4	6952.89
M301T230	[M+H]+	Bifenazate	0.359444	1.00559	0.977791	301.154	229.915	0.573421		C18589	Benzenoids	Benzene and substituted derivatives	Biphenyls and derivatives	231.411	10	10	29705.3	57811	19313.6	50689.4	27436	38054.6	44268.9	101142	57921.4	57143.6	30069.1	55729.3	57419	22279.3	49421.8	57307.5	34906.5	54039	45293.5	25973.8	68129.8	20904	31684.7	69458.4	20959.1	56200.3	25967.3	42192.2	63156.7	62736	52946.8	29870.5	29327.8
M585T64	[M+H]+	Bilirubin	1.18325	1.60635	0.524071	585.268	64.119	2.18883	HMDB0000054	C00486	Organoheterocyclic compounds	Tetrapyrroles and derivatives	Bilirubins	81.73	9	4	27715	151222	16735.4	145296	20079.6	23273.2	283074	24813.5	18188.9	99970.4	64382.6	236548	414572	25815.8	54321.7	46445.3	69881.1	29749.9	278046	39428.9	150051	104123	46674.9	28620.7	29787.1	553552	19221.8	46800.4	75079.9	189696	96915.2	23618.1	18745.3
M370T185	[M+H-H2O]+	Bimatoprost amide	0.341548	1.07669	0.59325	370.257	185.168	0.214969			Lipids and lipid-like molecules	Fatty Acyls	Eicosanoids	202.073	10	9	56763.8	37396.7	64929	52521.6	48996.8	31885.9	40789.4	50436.7	59758.5	51900.2	49444.4	56875.5	39674.4	49025.2	56600.8	40305.8	45229	54047.1	53024.6	63742.2	43090.4	61399.4	61547.3	39175.3	59137.6	35726	82649.1	36513.3	41760.3	40611.7	40026.5	52075.4	41570.2
M481T127	[M+H]+	Bis(2,2,6,6-tetramethyl-4-piperidyl) sebacate	0.454166	0.706616	0.0485363	481.415	126.688	1.11853			Lipids and lipid-like molecules	Fatty Acyls	Fatty acid esters	134.528	7	7	14399	18229.5	2351.08	10196.2	18803.8	9612.24	15910.6	11059.3	17034.7	8666.06	17150.4	14951.9	12934.3	12128.8	17135.8	10338.6	9076.37	24926.9	24796.8	8401.37	10887.4	22366.2	7840.17	14879.3	2528.78	5058.48	15616.1	16547.1	9339.19	9665.74	13806.3	11537.2	10492.8
M393T213	[M+Na]+	Bis(2-ethylhexyl) adipate	0.70986	0.855077	0.569572	393.309	212.996	7.88078	HMDB0040270	C14240	Lipids and lipid-like molecules	Fatty Acyls	Fatty acid esters	214.563	8	7	31478.9	37405.3	32168.3	95394.3	39402.6	52793.9	54590.5	129296	18013.1	72937.9	60415	45180.8	62562.4	154268	114875	134810	56654	47185.1	50099	115516	55218.4	53583.9	105319	59833.6	41745.9	63248	125323	43996.2	38006.9	49179.7	62554.2	47914.3	38564.6
M229T126	[M+H]+	Bisphenol a	0.502601	0.974585	0.848056	229.117	125.916	1.2535	HMDB0032133	C13624	Benzenoids	Benzene and substituted derivatives	Diphenylmethanes	132.855	9	8	105675	76792.1	106343	189268	84531.8	128104	121677	137091	58850.2	220247	193480	151985	204762	116275	176323	161948	188420	131819	93634.1	127974	123352	78267.7	157280	137132	102555	162278	144654	128886	109137	154138	235085	169769	129754
M363T264	[M+Na]+	Bisphenol a diglycidyl ether	0.55867	1.15777	0.599092	363.162	264.165	0.317055	HMDB0032737	C14348	Benzenoids	Benzene and substituted derivatives	Diphenylmethanes	267.46	10	10	86077.8	27320.3	46376.7	12446.7	39965.9	14817.8	19367.9	7788.88	15779.3	12903.6	11190.5	18693.3	12894.2	14226.6	13176	9598.43	12083	12684	13746.7	23037.5	9695.79	17613.6	7451.35	9893.42	28925.9	14629.5	24162.6	5844.68	7806.11	8703.27	15009.7	19666.6	6873.2
M149T220	[M+H-C6H6O]+	Bisphenol b	0.960302	0.791345	0.425394	149.106	219.748	4.07257		C14225	Benzenoids	Benzene and substituted derivatives	Diphenylmethanes	223.25	10	10	32188.3	9582.77	20616	37366.4	13275.8	50625.2	56713.1	55993.2	16456.7	62005.2	123086	67027.9	63189.3	76232.1	153345	57113.6	88071.6	53494.2	55147.1	93482.4	61939.7	39565.1	73848.5	65488.4	33602.3	43779.1	27812.2	55961.4	44922.2	72347.8	66522.8	47164	44967.9
M530T369	[M+H]+	Blood group a trisaccharide	0.130215	0.972894	0.884338	530.194	368.698	2.00966			Organic oxygen compounds	Organooxygen compounds	Carbohydrates and carbohydrate conjugates	376.962	6	6	2386.76	9447.83	6345.27	11408.9	11935	4485.59	2797.46	7170.95	8663.13	13097.9	3868.26	4259.76	3572.67	3706.62	8517.03	3917.18	6647.92	5494.4	11536	4268.58	3916.22	17349.2	3660.12	4259.23	3155.8	3171.98	4819.79	10144.2	3588.77	2953.44	4055.7	6286.74	6882.84
M511T413	[M+Na]+	Blood group b trisaccharide	0.379282	1.14669	0.443703	511.161	412.524	2.03283			Organic oxygen compounds	Organooxygen compounds	Carbohydrates and carbohydrate conjugates	420.918	9	10	56700.7	27156.5	49019.3	86744.4	52464.6	60828.2	45908.5	62828.3	50479.2	95475.9	75931.2	44751.8	82225.2	97400.3	41707.9	28017.5	49444.4	47149.4	77074	73971.3	56086.2	75648.5	83345.7	58932.3	43228.8	84540.4	198474	116791	85365.4	112086	41029.6	58499.8	59764
M285T152	[M+H]+	Boldione	0.100963	1.0033	0.979357	285.197	152.02	1.85423	HMDB0003422	C20144	Lipids and lipid-like molecules	Steroids and steroid derivatives	Androstane steroids	173.685	9	9	91195	37779.2	21618.9	27043	20597.3	24663.6	32862.2	38705.4	27462	44416.6	29467.2	27247.4	20748.8	23400.1	42660	18140.1	43708.2	24023.4	30214.8	15325.1	34699.7	36984.8	29890.8	35420.7	34881.2	30636.6	59995.5	37861.8	15010.6	24870.7	29133.9	24184.2	39358.8
M418T251	[M+H-4H2O]+	Borrelidin	0.331231	0.864075	0.532024	418.257	250.93	3.66735		C15687				252.734	7	5	12765.5	58788.9	53387	33163.2	65676.1	30712	40344.9	33342.5	25201.3	35249.6	23175.6	21740.7	63833.2	18130	38222.5	25304.3	23660.9	21924.9	43488.7	58994.9	21003.5	21181.2	28444.9	25989	12962.2	44008.7	11662.8	20242.1	18296.1	24106	48340.9	21657.8	16017.9
M297T79	[M+H-C6H14O]+	Brassicasterol	6.531	1.29641	0.518127	297.241	79.285	3.2299		C08813	Lipids and lipid-like molecules	Steroids and steroid derivatives	Ergostane steroids	82.886	10	9	851654	1.36832e+06	5.71244e+06	1.16403e+06	5.13941e+06	1.57235e+06	1.18106e+06	1.07481e+06	1.78955e+06	1.52025e+06	1.40061e+06	1.279e+06	1.45333e+06	663603	1.38977e+06	1.31459e+06	1.16245e+06	1.27635e+06	1.10798e+06	1.37582e+06	1.08039e+06	2.04276e+06	627356	948753	1.00593e+06	1.10932e+06	2.08121e+06	880556	577054	1.08222e+06	933202	1.28277e+06	1.37248e+06
M291T322	[M+H-CO+2i]+	Bromoenol lactone	0.162175	0.766946	0.235471	291.013	322.015	5.74055						323.937	9	10	5552.14	4275.6	5203.41	4099.77	3951.38	3491.59	5249.39	5185.62	7151.3	3666.02	5175.29	4773.36	4187.12	3593.36	7199.88	4667	4571.95	4626.14	2073.82	6431.02	5663.45	1422.19	5374.85	3323.7	4310.59	3325.66	5769.23	2346.92	3302.6	2982.4	5872.26	3773.63	2662.86
M387T301	[M+H]+	Bufalin	0.542348	0.925466	0.766787	387.269	301.132	4.62002		C16922	Lipids and lipid-like molecules	Steroids and steroid derivatives	Steroid lactones	312.018	10	8	7716.17	6021.65	8830.74	15225.5	10723.5	27514.7	15468.4	12266	5541.87	24186.3	21760.4	18695.7	7438.29	23275.6	28899	17574.2	35161	26395	9599.81	40759.6	23602	33422.7	25149.4	18224.5	47647.5	5228.25	9993.54	18768.5	9058.55	16697.7	14800.6	19927.5	20864.7
M237T158	[M+H-O3S]+	Bupirimate	0.918076	0.961897	0.869292	237.195	157.978	4.4992		C18776	Organoheterocyclic compounds	Diazines	Pyrimidines and pyrimidine derivatives	167.996	10	10	21589.2	10882	28490.9	127530	10214.1	115106	87299	105517	28346.8	114202	107696	68184.1	115459	92498	116497	85248.6	107513	102203	95626.9	70968.2	99084.7	60429.2	37045	130331	47588.6	90891.6	17397.6	89815.6	109447	78707.1	147283	79477.7	84563.3
M171T55	[M+H-C4H6]+	Butalbital	0.350058	0.840745	0.688374	171.076	54.862	2.55998	HMDB0014386		Organoheterocyclic compounds	Diazines	Pyrimidines and pyrimidine derivatives	56.98	10	8	43889.5	54437.2	163011	16348.2	116948	19575.1	9980.19	14567.1	31919	11625.4	36952.5	12245.4	187308	75584.8	124246	33927	29479.4	21549.8	15057.5	80838.7	198314	26134.6	51691.7	12717.2	210502	8077.53	191549	16732.6	23699.9	23807.7	22567.6	8471.97	18080.7
M551T39	[M+H]+	Butanamide, n-[(3s,5s)-1-(1,3-benzodioxol-5-ylmethyl)-5-(1-piperazinylcarbonyl)-3-pyrrolidinyl]-n-[(3-methoxyphenyl)methyl]-3,3-dimethyl-	0.593351	0.873016	0.321575	551.325	38.5355	5.48178			Organic acids and derivatives	Carboxylic acids and derivatives	Amino acids, peptides, and analogues	39.577	7	3	35322	38910.5	65249.1	42451.2	29832	34029	40126.3	45691.2	86367.9	33161.9	52631.7	43314.2	42944.9	62573.9	38916.9	49078.3	49496.5	38038.2	30227.9	15632.3	52139.5	35185.1	36737.2	37029.9	73696.7	50723.7	63197.7	31596.4	45084.1	58723	64661	48471.1	35051.5
M195T146	[M+H]+	Butyl 4-hydroxybenzoate	0.297341	0.966946	0.876153	195.087	146.071	2.30811	HMDB0032575		Benzenoids	Benzene and substituted derivatives	Benzoic acids and derivatives	159.262	8	9	7507.68	10531.8	4471.12	74769.2	48467.4	36509.1	37305.2	34739.8	33991.8	43737.5	33022.5	39520.4	51845.4	36932.4	55675.1	59550.6	48511.2	42203.7	30802.7	44562.7	43928.8	25666.4	30378	38326.9	61311.9	36694	14940.8	46281.2	35135.8	24780.6	53154.1	32753.4	50072.4
M288T39	[M+H]+	C17-sphinganine	1.00719	0.93943	0.663435	288.289	39.09	0.801132			Organic nitrogen compounds	Organonitrogen compounds	Amines	46.778	8	10	781294	1.08892e+06	1.13085e+06	641740	1.75748e+06	1.59997e+06	743776	809363	1.01025e+06	887336	1.20056e+06	1.2302e+06	1.44597e+06	1.2606e+06	1.06755e+06	696221	799746	711511	878087	938700	954570	728977	771728	1.43812e+06	791399	1.13089e+06	1.75838e+06	933124	708387	603807	603961	1.24588e+06	1.53376e+06
M380T151	[M+H-H2O]+	C-6 ceramide	0.48244	0.885735	0.527507	380.362	150.582	1.88504			Lipids and lipid-like molecules	Sphingolipids	Ceramides	159.837	10	10	4551.53	2681.54	2387.75	17915.9	2357.82	17863.7	21233.9	17345.1	17194.3	25274.7	21200.7	16847.4	16700.7	13905.3	18782.1	18845.7	18302	21777.9	20482	9710.61	17179	11012.6	15888	25149.9	9359.03	16620.1	2303.2	15211.7	15428.6	13716.8	5606.28	15590.4	14499.1
M452T290	[M+H]+	Cabergoline	0.429511	1.04083	0.81858	452.309	290.445	1.823	HMDB0014393	C08187	Alkaloids and derivatives	Ergoline and derivatives	Lysergic acids and derivatives	304.726	10	10	96572.9	64516.9	36664.1	118783	69572.9	87279.9	61489.7	107058	32658.2	132908	77604.7	95165.9	64371.5	47008.9	121977	56284.3	68145	91260.4	85683	49850.5	96412.4	48743.9	97913.2	80159.9	85119.8	95801.5	70816.3	23247.5	74299	83336.5	41384.3	70719	64520
M541T393	[2M+H]+	Cadusafos	0.182455	1.09407	0.650009	541.171	392.923	0.26512		C18395				406.849	8	6	8503.21	5495.19	6247.75	6794.85	5561.39	17316.1	7985.33	6696.65	5159.91	8716.2	18284.4	4651.44	4024.27	5642.46	13185.9	37586.7	8808.84	6755.48	5648.79	9156.82	9740.91	9316.64	13362.2	9385.06	20022.8	5964.49	7550.34	9885.08	6855.95	8935.37	6039.03	5656.35	11944.6
M423T303	[M+H-C9H16O4]+	Candesartan cilexetil	0.384252	1.03941	0.81907	423.145	303.445	1.44608		C07709	Benzenoids	Benzene and substituted derivatives	Biphenyls and derivatives	317.246	10	10	18148	43263	26006.6	61667.4	48631.5	75727.3	49720.7	107499	54662.6	54677.4	54823.7	75609.4	29981.6	86099.8	75911.8	57966.7	59213.8	74040.4	60533.4	78083.1	59196.6	43193.2	57436	60286.6	47548.4	31883.2	45488.1	66451.7	53596	44704.5	66577.2	40407.8	55399.7
M293T55	[M+H-H2O]+	Cannabinol	6.77434	1.27317	0.367127	293.211	55.452	4.58332		C07580	Organoheterocyclic compounds	Benzopyrans	1-benzopyrans	57.047	10	10	1.09116e+06	656660	2.32175e+06	6.78272e+06	1.39491e+06	5.68491e+06	3.56623e+06	8.83206e+06	835698	1.0516e+07	1.19379e+07	3.83556e+06	4.19426e+06	4.70866e+06	6.97402e+06	5.36864e+06	6.30338e+06	6.69856e+06	7.4943e+06	5.01916e+06	7.59393e+06	4.60092e+06	5.8087e+06	3.70267e+06	5.90472e+06	4.28937e+06	2.65271e+06	5.12141e+06	3.44814e+06	4.35272e+06	8.99794e+06	4.36225e+06	4.77268e+06
M565T258	[M+H]+	Canthaxanthin	0.130478	0.892417	0.529638	565.393	257.526	1.30446	HMDB0003154	C08583	Lipids and lipid-like molecules	Prenol lipids	Tetraterpenoids	262.686	10	10	16641.9	25826.5	21314.2	2712.45	22298.8	25075.8	30734.6	26740.3	9137.68	30965.4	22570.8	22244.4	20767.5	11272	21804.4	20019.1	23429.5	15006.5	22469.3	15532.3	30673.4	28836.8	11240.4	21519.3	34983.8	15617.4	18545.1	22890.2	18775.8	30178.3	19200.9	23218	18762.4
M172T311	[M+H-CH2O2]+	Captopril	1.00771	1.87783	0.273996	172.059	311.368	1.6781	HMDB0015328	C06867	Organic acids and derivatives	Carboxylic acids and derivatives	Amino acids, peptides, and analogues	312.988	9	10	34725.5	22247.3	227782	26347.6	17601.3	46802.4	14773	22656.3	71000.4	11952.4	10429.1	10339.4	15305.7	11357.4	28919.6	17121.5	61292.4	12547.3	46043.2	14823	13150.3	16294.9	17171.2	9211.85	8277.61	11409.2	172322	12860.6	13462.2	11996.8	7881.85	22155.1	19843.7
M177T102	[M+H]+	Carbamoylaspartate	0.422499	1.17847	0.517028	177.054	101.513	5.89301	HMDB0000828	C00438	Organic acids and derivatives	Carboxylic acids and derivatives	Amino acids, peptides, and analogues	123.277	9	9	38693.4	19576.4	18683.9	116223	19158.4	46562.7	117464	61995.4	18177.4	49168.9	74586	30981.9	37898.3	42179.6	31562.8	79213.6	76578.8	62864.8	58481.4	9833.46	155661	41127.8	27795.9	73156	42072.8	77793	32592.3	63468.6	47709.9	74323.5	58503.1	68546.9	39298.4
M593T284	[M+Na]+	Carbenoxolone	0.933489	1.0578	0.864251	593.331	283.89	0.175612			Lipids and lipid-like molecules	Prenol lipids	Triterpenoids	285.618	10	10	325549	1.28449e+06	39576.3	756577	226721	617583	935245	1.53919e+06	186756	1.21334e+06	812645	1.5504e+06	1.99932e+06	374826	1.0615e+06	1.328e+06	821753	635366	898769	599445	1.6009e+06	619603	825977	860904	240866	1.48052e+06	110646	757955	1.52248e+06	1.33265e+06	1.29103e+06	315183	327803
M176T159	[M+H-C4H7ON]+	Carisoprodol	0.524624	0.97044	0.832263	176.142	158.703	1.09509	HMDB0014539	C07927	Organic acids and derivatives	Carboxylic acids and derivatives	Amino acids, peptides, and analogues	170.006	10	10	29772.8	27775.6	33828.5	54338	33927.9	49842.8	43671.9	61416.5	21970.6	57394.9	57046.6	36374.6	56889.4	58998.8	69970	49113.9	64500.7	55764.7	50931.8	48649.4	52886.1	39590.7	34808.9	61662.2	48129.5	49808.6	35282	50216.2	47977.8	44825.6	35623	48249.6	46666.7
M162T355_2	[M+H]+	Carnitine	0.846706	0.955338	0.877305	162.112	355.18	6.84368	HMDB0000062	C00318	Organic nitrogen compounds	Organonitrogen compounds	Quaternary ammonium salts	369.922	10	10	1.65624e+06	1.09258e+06	679191	886401	1.03628e+06	524694	803912	641536	603081	1.32106e+06	448516	1.40955e+06	417201	1.42996e+06	1.98867e+06	668897	512527	427574	779801	2.18172e+06	527278	989580	2.4515e+06	398052	479665	381963	579211	615160	434460	551621	282604	832996	980357
M407T266	[M+H]+	Carvedilol	0.517623	1.25938	0.295801	407.188	265.705	1.55684	HMDB0015267	C06875	Organoheterocyclic compounds	Indoles and derivatives	Carbazoles	267.083	8	9	50762.2	21260.2	31191.3	9574.87	33752.8	13302.8	11326.4	15914.3	12451	9511.85	13723	16822.8	11547.3	12743.7	10355.3	12067.6	19556.7	17504.6	8508.38	19788.3	11296.3	12130.9	4336.51	11017.1	21557.9	10644.3	20245.9	13116.1	9366.81	11053.2	12310.5	14927.6	8105.17
M151T144	[M+H]+	(+)-carvone	0.550146	0.864861	0.638999	151.122	144.339	3.85136	HMDB0004487	C11383	Lipids and lipid-like molecules	Prenol lipids	Monoterpenoids	153.407	10	9	655488	25138.7	191479	110413	110912	69569.3	178760	74094.1	14483.8	279785	147907	136123	36799.7	64597.9	251007	93013.6	57973.2	67531	56250.8	62154.9	63189.7	125738	72274.2	75035.5	25851.4	28737.7	144087	48084.8	85749.8	102339	37142.9	111964	49341
M574T443	[M+H-H2O]+	Cevadine	0.0768971	0.916229	0.700866	574.316	442.671	2.35117			Lipids and lipid-like molecules	Steroids and steroid derivatives	Steroidal alkaloids	444.943	6	8	4489.89	3828.76	5571.06	6166.85	10248.1	5481.34	1666.27	1978.7	5638.87	1930.55	8383.83	4067.93	6679.55	10530.4	3863.94	10346.4	10667.9	10405.4	8409.24	13601	1097.77	6516.7	7015.41	7074.72	9312.34	6791.93	5455.82	3609.63	7510.42	7956.38	7364.02	3826.15	6576.15
M323T79	[M+H-H2O]+	Chitobiose	0.746981	1.48904	0.0586471	323.153	78.9865	2.69682	HMDB0003556	C01674	Organic oxygen compounds	Organooxygen compounds	Carbohydrates and carbohydrate conjugates	82.967	10	9	57878.7	50440	50410.4	101383	25520.2	108635	78160.9	144280	58141.9	87515.6	55410.5	72868.8	88343.8	33248.1	57527.9	61675.9	56635.1	31412.9	23216.4	59272.1	73186.8	27072.4	49340.7	89100.5	73807.3	88099.9	13620	46436.8	65158.7	51208	165602	50634.4	89909.2
M543T425	[M+H-H2O]+	Chloramphenicol palmitate	0.409565	0.911027	0.756901	543.233	425.075	1.29805		C11726	Benzenoids	Benzene and substituted derivatives	Nitrobenzenes	427.527	9	9	11318.2	11050.8	6502.04	5986.41	6653.74	4627.31	9069.93	12193.3	30798.8	7124.66	7528.5	7701.43	9940.94	7890.66	7660.31	23107.5	4778.74	6339.05	6666.28	6618.98	8203.76	4317.54	5284.81	6680.64	3543.15	9202.5	2981.44	3077.78	9247.77	8454.15	7576.55	5695.03	5849.26
M425T199	[M+Na]+	Cholest-5-ene-3.beta.,4.beta.-diol	1.5666	1.71761	0.440359	425.335	199.076	0.759166	HMDB0013643		Lipids and lipid-like molecules	Steroids and steroid derivatives	Cholestane steroids	204.132	5	5	66015.3	541671	76294.3	24979.6	80296.3	53893.9	41773.1	50942	56718.8	22342.1	42427.4	235776	24919.2	24910.2	39393.4	55469.4	54012	23969.3	14213.1	98172	61698.2	46115.7	66843.8	30340.8	123561	45277.3	81014.1	50095	53362.1	19656.1	45185.6	133295	24184.4
M369T26	[M+H-H2O]+	Cholesterol	4.10875	0.83124	0.376931	369.351	26.147	0.237068	HMDB0000067	C00187	Lipids and lipid-like molecules	Steroids and steroid derivatives	Cholestane steroids	44.579	10	10	1.10475e+06	1.60301e+06	646881	879207	1.39375e+06	406707	1.39723e+06	859597	1.81744e+06	1.44002e+06	794630	1.85883e+06	1.06483e+06	471625	1.36574e+06	619013	428593	455562	1.89385e+06	687568	682314	907690	775499	563521	469598	1.16641e+06	676514	516560	1.03549e+06	789800	1.24107e+06	891003	505607
M832T373	[M+H]+	C.i. acid blue 90	0.387056	0.637831	0.0898121	832.324	372.607	2.07529			Benzenoids	Benzene and substituted derivatives	Phenylmethylamines	374.52	9	9	4438.34	6209.12	4274.15	4163.34	7057.87	6282.41	2118.43	4020.32	13500	3655.46	3869.66	3426.83	1006.72	8654.26	4898.77	3724.42	2922	6600.86	6493.35	7047.94	3358.06	4534.24	3841.17	1689.49	12638.5	1535.63	2780.15	6087.42	3051.48	5460.06	4631.27	8811.62	3388.12
M617T153	[M+H-H2O]+	Cimicifugoside h 2	2.21094	0.585347	0.377686	617.383	152.917	4.58682			Lipids and lipid-like molecules	Steroids and steroid derivatives	Cycloartanols and derivatives	160.934	9	9	64132.9	217669	30024.7	19033.7	53048.3	21211.4	63627.3	12881.9	399729	35926.1	28842.6	101703	148074	24450.8	76171.7	24863.8	28995.4	14667.1	49252.3	39343.1	33644.9	33707.4	43804.2	24828.7	23856.2	35850.7	31956.8	21505.2	37502.4	26468	88925.4	30229.7	25809.5
M277T145	[M+H-H2O]+	Cinchonidine	0.362633	1.09849	0.764523	277.169	144.65	2.61375		C11379				153.707	9	8	3462.14	45547.6	4709.69	30002	2833.42	26607.8	22891.2	28483.5	36029.4	25635.5	29492.2	3014.94	21877.9	21577.1	29180.9	19521.9	27607.5	20499	24582.5	17260.4	112976	21182.8	109453	28320.4	5003.87	21022.7	122239	19799.8	19817.2	24439	26985.3	14574.8	15837.5
M321T136	[M+H-H2O]+	Cis-13-docosenoic acid	0.0806734	1.10526	0.650816	321.325	135.639	1.8871	HMDB0002068	C08316	Lipids and lipid-like molecules	Fatty Acyls	Fatty acids and conjugates	143.187	10	10	2349.57	1444.03	2948.48	6475.75	2944.26	5582.52	2689.71	5121.37	3374.6	3558.3	10417	7336.86	9810.25	7520.15	6747.16	6403.11	7785.13	4445.15	5137.96	3893.42	4095.92	8084.76	3546.99	3429.01	2031.35	5947.45	5162.96	4371.06	4596.3	3061.93	7333.65	5211.27	4042.65
M132T425	[M+H]+	Cis-4-hydroxy-l-proline	0.445999	1.17945	0.543091	132.065	425.198	2.78816	HMDB0240251	C01015	Organic acids and derivatives	Carboxylic acids and derivatives	Amino acids, peptides, and analogues	427.78	7	6	28695.3	15176.1	45661.3	10167.6	21884.4	8368.99	10939.2	10225.2	18173.9	10706.4	9435.44	10670.5	10561.4	12225.1	14091.1	12102.7	8563.7	5234.77	6659.32	15953.7	7844.35	10904.5	9125.48	6638.45	12340	4339.05	21640.4	10006.5	4392.91	18990.4	8927.21	12000.3	20777.3
M466T217	[M+H]+	Cisapride	0.0910044	1.05216	0.710711	466.19	216.541	2.06802		C06910	Benzenoids	Phenol ethers	Aminophenyl ethers	231.165	6	8	5438.76	6870.27	10906.1	10901.1	14338.9	15093.3	6718.08	9720.03	9135.02	8678.69	8680.92	8010.16	7772.9	9983.2	9277.46	7739.29	10667.8	13087.4	8328.38	16005.2	5247.13	5648.49	7700.56	6752	15159	6082.47	8065.43	15570.9	7515.54	5223.58	9367.56	8196.24	5338.34
M249T38_2	[M+H-H2O]+	Cis,cis-9,12-octadecadien-1-ol	1.19107	0.789317	0.212655	249.257	38.499	0.968477			Lipids and lipid-like molecules	Fatty Acyls	Fatty alcohols	39.49	10	8	98521	84220.3	92394.6	64975.9	90036.9	76992.8	86479.6	76337	221078	63813	142668	120457	97525.4	165047	163826	76305.6	83409.4	72372.3	101898	148775	63069.8	91067.2	104265	65170	92224.1	83916.7	143719	51658.9	53087.7	70484.5	57883.9	96537.6	67441.9
M268T253	[M+H-C3H5ClO]+	Clethodim	0.359807	1.01908	0.95021	268.135	252.532	1.88644		C18609	Organic oxygen compounds	Organooxygen compounds	Carbonyl compounds	256.41	10	9	39082.4	10268.2	72578.8	22679	49497.1	21114.7	21645.5	28543	15702.7	25524.1	27947.5	19096.2	20262.5	18766.3	31229	28003.4	23606.9	28610.8	26474	15597.3	34255.5	13564.6	25370.9	28578.6	11714.9	14082.9	80462.9	22521.8	22025.7	20777.9	28526.4	15806.3	17433.2
M300T398	[M+H]+	Codeine	0.423274	0.950763	0.785578	300.155	397.714	3.10512	HMDB0004995	C06174				415.854	6	6	36296.6	17052.4	28630.5	25182.4	26249.7	6432.89	20318.5	29306.5	55363.4	25389.5	28041.5	26512	25059.1	24662.4	33924.8	25865.6	25494.9	20847.1	18021.6	32776.2	21774.3	10589.7	21714.9	15407.2	9208.46	26505.4	18151.2	16470.2	19213.8	20404.3	28236.7	21706.8	20038.1
M319T295	[M+H]+	Coenzyme q2	1.10847	1.07724	0.704942	319.2	295.013	0.103627	HMDB0006709	C00399	Lipids and lipid-like molecules	Prenol lipids	Quinone and hydroquinone lipids	296.049	10	10	225888	165405	180035	65133.4	177866	44913.7	76615.3	57707.2	48939.2	79560.2	83121.8	135438	122044	90315.5	80980.7	63039.4	72001.6	84311.7	80212.9	103202	64798.9	99621.7	54264.5	80152.8	138117	127419	132350	40894.6	64115.9	66443.2	101972	119218	63395
M450T298	[M+H]+	Condelphine	0.139271	1.00434	0.97593	450.293	297.8	1.39933		C08671	Lipids and lipid-like molecules	Prenol lipids	Diterpenoids	301.962	10	9	19515.4	32183	32630.5	40676.6	46365.2	31184.4	43948.5	53079	28563.2	53944.6	37504.6	36648.4	24806.6	33482.4	63102.3	18681	38296.7	41898.4	39476.5	54592.6	48293.5	33937.6	53379.2	33313.9	48787	43468.6	24634.5	33583.3	29115.2	30245.3	20199.9	27052.2	31705.7
M360T35_1	[M+NH4]+	Coniferin	0.323053	1.09599	0.824504	360.184	35.2985	1.42014	HMDB0013682	C00761	Organic oxygen compounds	Organooxygen compounds	Carbohydrates and carbohydrate conjugates	58.529	7	7	31253.9	8593.81	4967.57	35360.5	32432	10314.2	12902.6	61704	9235.41	7393.65	11360.6	27304	7855.34	7698.65	47517.6	22994.5	5846.33	50222.8	6476.91	7704.53	9670.63	6440.8	16830.7	10175.6	3246.17	29021.6	2548.9	11555.1	7994.42	6311.54	8023.36	12664.5	20980.1
M128T220	[M+H]+	Coniine	0.373563	1.39023	0.33534	128.142	219.883	2.12143	HMDB0030285					223.15	8	5	8021.6	21404.8	10397.6	6609.07	5626.14	7619.11	758.29	7118.24	4015.11	1349.97	1616.26	509.453	6788.83	872.281	7776.82	15129.5	3627.68	392.92	5816.36	1540.02	1257.78	2243.88	3744.74	656.069	675.625	645.746	5338.34	2598.34	6003.87	1012.88	629.603	6043.59	1693.4
M306T335	[M+H]+	Convolvamine	0.131514	1.35952	0.37664	306.18	334.532	2.60615		C10854	Benzenoids	Benzene and substituted derivatives	Benzoic acids and derivatives	352.179	7	5	3243.28	10741.8	9413.5	22478.8	13735.8	23548.9	17218.3	18210.1	16577.3	68192.3	26028	16245	27180.8	14446	21995.1	21670	76449.6	18072.4	26852.3	11963.5	24019.6	21934	17069.7	39741.3	18154	32946.2	9111.96	26539.6	30173.9	20123.4	102061	13169.8	22949.1
M655T397	[M+H]+	Coproporphyrin I	0.420645	1.4523	0.524997	655.274	396.951	3.27849	HMDB0000643	C05769	Organoheterocyclic compounds	Tetrapyrroles and derivatives	Porphyrins	399.506	8	8	25904.1	8921.7	19703.5	5302.25	9324.19	4902.14	4589.31	1837.59	11722.8	7905.66	4981.88	3829.28	3134.37	3522.2	7217.81	4048.13	2408.23	3672.19	2108.04	9441.05	8988.32	5729.58	3842.37	3538.42	5752.88	3804.6	7848.38	6266.57	3576.88	3435.23	4726.79	2363.95	4761.24
M353T336	[M+H-2H2O]+	Corticosterone 21-acetate	0.620766	1.80513	0.189089	353.191	335.767	5.02145		C14675	Lipids and lipid-like molecules	Steroids and steroid derivatives	Pregnane steroids	348.139	7	6	7691.79	51319.9	28500.3	8054.05	2654.3	10469.8	5044.5	5716.17	6872.86	12202.2	5768.02	22113.7	15739	3870.14	4759.13	10757.6	12220.7	8789.57	12700	4572.94	7474.42	9861.1	5601.42	7289.86	6315.19	4974.51	4818.88	8643.74	6651.06	4968.07	13115.3	8678.57	8552.63
M370T399	[M+H]+	Corydaline	0.623137	0.849319	0.412027	370.196	399.262	1.43943		C15530				403.565	4	7	43342.1	38637.9	18669.3	12354.9	31786.4	15415.2	17830.3	26901.1	46480.9	24558	19974.1	34273.1	23652.6	16158.4	15377.7	14437.1	17485.6	16287.9	17876.1	11858.5	16329.7	9670.76	13068	11283.4	18778.6	18681.5	15251.7	13129.8	10757.4	16350.8	20878	18992.3	12741.6
M114T171_2	[M+H]+	Creatinine	4.72337	0.912685	0.800932	114.066	170.861	5.54038	HMDB0000562	C00791	Organic acids and derivatives	Carboxylic acids and derivatives	Amino acids, peptides, and analogues	190.705	10	10	1.07953e+06	703048	4.58823e+06	1.16356e+06	3.85574e+06	7.17224e+06	4.29936e+06	4.53836e+06	1.36793e+06	3.30997e+06	7.83953e+06	1.74416e+06	607984	6.0356e+06	1.18657e+07	1.2382e+07	1.78747e+06	1.61122e+06	1.19995e+06	5.66477e+06	672499	1.24575e+06	4.66236e+06	613147	7.83532e+06	292310	754077	5.3634e+06	7.5156e+06	3.14377e+06	312233	1.58268e+06	2.84851e+06
M539T211	[M+Na]+	Cucurbitacin d	1.18505	1.27216	0.417609	539.321	210.576	0.982618		C08796	Lipids and lipid-like molecules	Steroids and steroid derivatives	Cucurbitacins	212.771	10	10	35999.3	48783.6	36791.8	227954	37567.6	199541	102595	169059	24256.7	137757	188005	66920.4	48353.5	121387	102578	165770	144525	131124	118852	153813	163471	117282	180653	185868	109664	37090.7	80379.7	181997	124838	135310	93130.8	106500	151967
M579T152	[M+Na]+	Cucurbitacin e	0.517818	0.663243	0.0828308	579.267	152.218	2.2066			Lipids and lipid-like molecules	Steroids and steroid derivatives	Cucurbitacins	160.975	10	9	7264.14	29515.9	4318.66	13800.7	22839	13437.7	14997	10456.8	8182.7	33542.8	18273	106991	38323.1	10583.2	20970	21158.4	14657.3	9938.43	29227.4	27133.9	16229.7	28354.1	8558.69	13937.3	16042.8	11230.1	14664.4	12357.9	26304.7	12515.2	22084.7	25190.7	12982.4
M497T228	[M+H-H2O]+	Cucurbitacin i	0.467566	1.12823	0.660746	497.31	228.016	4.12797		C08800	Lipids and lipid-like molecules	Steroids and steroid derivatives	Cucurbitacins	229.223	8	10	19417.5	39004.5	19665.1	112017	37585.7	39878.2	62091.5	42595.1	6152.74	174462	79979.4	60212.9	25299.8	29349.4	31197.7	72251.4	41071.2	38723.6	46389.4	63278.7	62404.7	159948	39877.5	88202.7	96109.4	16681.7	51520.7	93787.9	34720.4	84464.3	33806.2	38284.4	58177.9
M257T305	[M+Na]+	Curcumenol	0.275172	0.93972	0.827369	257.132	305.07	4.28979	HMDB0033960	C16942	Lipids and lipid-like molecules	Prenol lipids	Sesquiterpenoids	311.485	8	5	16727.4	18518.6	37203.1	15808.3	40298	6172.44	3282.03	10477.1	20249.5	4112.42	3643.77	12641.5	11434.1	5369.46	5519.82	6000.25	15164	12660.2	8872.53	9959.09	13855.7	19822.8	3583.84	13976.2	25746.5	6455.94	10673.4	10474.4	4459.57	9698.97	5823.07	25126.9	10691.5
M237T184	[M+H]+	Curcumol	0.213654	0.980365	0.905712	237.184	184.353	2.93934	HMDB0038122		Lipids and lipid-like molecules	Prenol lipids	Sesquiterpenoids	191.668	6	6	16428.4	21925.1	25610.6	7752.18	22470.6	15007.2	18612.2	21937.2	31398.8	4361.3	14228.3	16616.2	25060.1	24123.7	24694.1	21111.2	24819.8	26418.6	13661.9	43699.7	14072.5	23534.7	12464.2	20894.9	30592.9	22415.4	40974.2	4975.76	17837	11898.6	18242.9	26009.6	20317.9
M263T174	[M+Na]+	Cyanazine	0.49405	1.02159	0.926915	263.095	173.644	3.11369		C14299	Organoheterocyclic compounds	Triazines	Aminotriazines	181.315	10	10	159409	61029.9	208032	134068	137690	97297.6	103795	145072	158555	118399	125906	74763.1	78123.9	87695.2	158511	64786.2	101291	151081	69929.5	89019	93594.5	64677.2	105841	102671	87106.2	74268.4	249444	90454.2	70528.3	74055.1	104096	109141	86702.5
M743T394	[M]+	Cyanidin-3-o-sambubioside-5-o-glucoside	0.414498	1.71342	0.181285	743.22	394.031	0.887989			Phenylpropanoids and polyketides	Flavonoids	Flavonoid glycosides	418.491	8	6	5673.12	4560.41	5501.1	37103.4	5258.35	31923.6	11900.1	13554.9	3142.53	31867.1	17124	8672.53	2720.2	7292.03	7484.94	9608.1	14004.7	30301.6	32212	17474.7	27513.5	19400.5	7549.74	14672.9	13467.9	4632.28	6060.87	43904.6	5163.94	16071.8	5495.17	11831.7	10756.2
M226T282_2	[M+H]+	Cyclocytidine	0.103164	1.03145	0.857638	226.082	281.783	3.41344			Organic oxygen compounds	Organooxygen compounds	Ethers	300.322	9	8	10205.6	8047.54	8960.8	6944.56	16885.8	12977.6	6572.73	14639.1	7808.74	6182.32	11129.4	3280.47	16245.7	14439.7	13579.2	11312	13963.2	8010.5	11524.9	8381.75	11987.7	12567.3	6634.71	12377.5	10580.1	8677.62	10191.8	3624.68	11193.6	9841.16	15706.3	10070.1	13315.2
M282T151_1	[M+H]+	Cycloheximide	1.15506	0.735923	0.108628	282.184	150.528	2.9747		C06685	Organoheterocyclic compounds	Pyridines and derivatives	Hydropyridines	159.324	10	10	24873	24086.8	24616.4	38520.2	37067.5	36387.1	53015.6	33092.5	102593	23790.3	48785.4	43963.5	30470.7	27101.9	35706.7	47276.5	65035	40203.1	58380.3	30380.1	70122.6	56634.9	33453.5	51027.6	25114	42973.5	23591	39482.8	39114.6	21208	50527.7	70776.4	38559.4
M422T378	[M+H]+	Cyclosulfamuron	1.05754	1.1012	0.728492	422.104	378.272	1.81841		C18439	Organic oxygen compounds	Organooxygen compounds	Carbonyl compounds	384.013	10	10	75990.9	118917	137742	89998.6	274374	94111.5	47474.7	219432	17695.7	77349.8	140590	40934	14079.4	167027	78812.9	80729.3	107066	81482.2	84824.3	165615	103461	74261.3	170852	22407.5	137778	12017.3	121498	94064.4	22773.4	61163.5	27604.8	92317.8	61622.6
M372T231	[M+H-CH5N]+	Cyclovirobuxin d	0.335969	0.955714	0.857757	372.345	231.263	2.55055			Lipids and lipid-like molecules	Prenol lipids	Triterpenoids	233.021	10	9	3292.46	13196.6	8980.14	4921	10694.4	3243.88	5470.04	5475.14	12788.2	4892.86	4868.64	7723.03	9309.53	3363.78	4976.34	4787.25	5517.98	3661.04	5512.49	3084.55	6370.87	1492.87	4818.25	4112.43	10481.4	4966.04	9008.75	3554.85	5243.99	6048.19	6533.59	1925.07	3529.6
M467T418	[M+NH4]+	Cyhalothrin	1.8107	2.20499	0.152755	467.135	417.628	1.61833		C10983	Lipids and lipid-like molecules	Fatty Acyls	Fatty acid esters	432.303	10	9	62828.1	9517.33	14821.7	297694	34203.1	292539	43809.4	344415	8143.36	239682	55062.7	99797.5	21767.3	76046.6	91690.8	197328	64634.8	196728	164846	124683	158424	36252.4	365172	79669.9	39688.2	13758.4	17572	454382	43278.9	246921	30512.9	16514.3	90528.9
M438T619	[M+Na]+	Cylindrospermopsin	0.225162	1.31897	0.567302	438.087	619.232	0.582434		C19999				635.633	10	10	9990.23	6349.51	52410.1	9019.52	6528.35	29523.5	9783.52	16414.4	32838	23464.9	13460.5	22323.9	8501.26	28223.3	5749.14	8427.03	8922.95	5933.24	45556.7	17780.1	5926.04	53280.3	22977.3	13779.4	8391.02	6622.06	7308.55	10970.4	6656.24	1965	3981.74	10306.2	3750.93
M292T186	[M+H]+	Cyproconazole	0.356099	1.25325	0.328086	292.132	186.369	0.413412		C18456				205.01	10	9	9692.91	6976.29	8588.11	25044.8	2145.55	22573.2	22627.6	28122.4	6826	23644.4	28903.4	9977.61	17565.7	14036.1	28922	22194.5	38052.4	18800.8	18957.5	16980.7	22911.4	6304.42	23174.6	23663.5	7271.35	13294.2	7160.81	20154.1	17688.1	22687.1	28614.4	14849.2	19852.9
M379T449	[M+H]+	Cys-Glu-Lys	0.383834	1.33671	0.08271	379.181	449.079	1.37636			Organic acids and derivatives	Carboxylic acids and derivatives	Amino acids, peptides, and analogues	451.307	9	8	13715.6	8291.99	15910	15545.4	11271.8	13141.1	6070.05	15342.9	9064.93	9118.41	12049.5	5019.4	6480.9	10830	9036.04	9906.3	10784.1	14547.1	8210.51	13904.5	7377.87	8166.67	5910.17	6292.9	17621.5	6363.54	9053.28	9381.99	13569	13270.1	8506.55	15932.3	9692.9
M335T340	[M+H]+	Cys-Gly-Arg	0.333194	0.929859	0.667494	335.143	339.659	2.07478			Organic acids and derivatives	Carboxylic acids and derivatives	Amino acids, peptides, and analogues	354.561	8	9	40201.6	19865.4	13454.1	20015.9	11898	15823.3	19889.1	16874.4	15573.2	15927.3	17261.9	136805	16859	10121.9	14110	10029.6	28011.3	14307.3	18775	9760.4	16012	17620.2	10078.5	23197.2	12013.2	11354.6	11937.3	14504.1	19799.2	19370.9	17960	32139.7	11481
M154T294	[M+2H]2+	Cys-Gly-Lys	0.146201	0.943906	0.483458	154.085	294.494	7.71091			Organic acids and derivatives	Carboxylic acids and derivatives	Amino acids, peptides, and analogues	303.966	7	5	32756.3	25352.6	38762.7	39455	25042.3	34215.5	21332.1	28138.5	28325	28945	27614	25962.6	39518.7	34893.1	31892.4	26822.8	32959.6	27664.3	28620.9	34696.2	29887.4	30958.9	28914.6	34529.8	27642.7	27373	29826.7	32286.8	32643.3	20845.4	29852.1	28686.9	26609.1
M244T254	[M+H]+	Cytarabine	1.61418	1.02287	0.927877	244.078	254.29	8.81146	HMDB0015122	C02961				268.404	10	10	192945	547630	476017	785292	1.3169e+06	943794	425223	1.07769e+06	380954	241995	651668	519147	96070.3	1.14421e+06	1.16101e+06	1.01756e+06	823744	779300	395553	1.13563e+06	728876	277468	889576	429514	779637	144213	385312	1.23812e+06	228381	402653	203741	364533	546404
M112T197	[M+H-C5H8O4]+	Cytidine	1.01786	0.887084	0.815024	112.05	197.213	5.41746	HMDB0000089	C00475				209.911	10	10	364288	147646	897440	75909.1	347238	35485.9	171215	115236	83448.5	364406	290421	176479	128302	48871.2	469771	37395.4	22041.4	56822.1	165556	153154	111585	53262.5	94935.6	87150	44832.1	29262.6	192721	101587	42032.8	63519.1	283242	319169	125051
M502T409	[M+Na]+	Cytochalasin b	0.196933	0.976743	0.945808	502.26	409.139	2.26715		C19954	Alkaloids and derivatives	Cytochalasans	Cytochalasins	423.887	9	9	10979.5	6363.09	59448.4	21724.5	31967.6	14554.7	5594.97	15175.5	37135.5	14178.7	12238.7	4486.01	3639.72	19040.9	14264.4	8141.61	8640.18	13065.5	9206.22	18518.2	5385.31	15495.6	10884.7	1786.93	21434.1	3670.84	33474.3	8783.66	3656.28	9404.36	3863.75	20122.1	9595.06
M223T193	[2M+H]+	Cytosine	0.280568	1.05994	0.797645	223.118	193.226	3.78407	HMDB0000630	C00380	Organoheterocyclic compounds	Diazines	Pyrimidines and pyrimidine derivatives	211.912	10	9	24379.3	7710.26	39762.5	19695.6	2033.76	27921.4	13656.8	26920	9253.02	20319.3	24597.3	15983.1	25643.5	20988.5	33305.9	22985.7	20254.2	15561	30175.3	10883.3	15192.3	6774.79	19739.6	52654.5	4565.97	29548.1	11123.8	25466.2	21672.4	12531.6	26656.7	16878.2	16125.4
M104T338	[M+H]+	D-2-aminobutyric acid	0.0523688	0.993064	0.986962	104.07	338.401	2.86235	HMDB0000452	C02261	Organic acids and derivatives	Carboxylic acids and derivatives	Amino acids, peptides, and analogues	347.448	8	8	6782.27	13626.3	14583	5238.69	3584.94	9674.63	5095.67	10409.3	11060.4	22015.2	5791.73	32386.7	12325.2	6883.65	46187.1	5294.96	9746.94	7617.65	11648.8	24259.9	6056.02	14183	3315.05	3545.06	14882.9	7289.04	17742.8	11214.1	5565.01	10402.8	8135.54	12461.9	36184
M255T49	[M+H]+	Daidzein	3.47717	1.36304	0.323764	255.065	49.0505	5.6899	HMDB0003312	C10208	Phenylpropanoids and polyketides	Isoflavonoids	Isoflav-2-enes	50.022	10	10	1.28711e+06	284109	1.79223e+06	1.97104e+06	510463	378784	1.08784e+06	716296	97167.8	484025	576473	685203	781652	442435	730040	703304	750744	373463	400211	974752	657936	301195	521981	1.78133e+06	1.22763e+06	111601	889794	1.30893e+06	969362	1.44388e+06	162599	427391	709507
M417T146_1	[M+H]+	Daidzin	0.482506	1.18432	0.481073	417.116	145.991	1.4486	HMDB0130491	C10216	Phenylpropanoids and polyketides	Isoflavonoids	Isoflavonoid O-glycosides	154.997	10	9	30850.8	18725.3	14256.7	47547.2	15684.2	37605.7	17345.1	14303.8	5030.14	20332.5	14639	24797.5	12335.1	29646.1	22203	33017.5	24409.3	23510.1	17175.1	31713.9	22459.8	19860.8	21569.7	18697.4	38145.7	11551.3	25549.9	34849	32223	29097.2	18399.9	27286.5	35476.8
M458T332	[M+H]+	D-amygdalin	0.243776	0.919037	0.60007	458.166	331.813	3.92379	HMDB0035030	C08325	Organic oxygen compounds	Organooxygen compounds	Carbohydrates and carbohydrate conjugates	346.841	8	5	2452.41	5193.55	4657.58	7415.16	3929.52	7064.92	2758.01	2968.95	9295.43	4218.91	6311.95	6101.96	5380.99	4126.56	3935.56	10092.9	6272	4272.95	6496.86	2349.1	3823.37	14895.1	4373.67	2775.24	7847.31	5509.52	4231.9	7377.8	4025.62	10345.6	9609.32	9014.82	8130.93
M363T302	[M+H-C6H15O4N]+	Daunorubicin	2.75235	2.60779	0.121007	363.089	301.783	1.09758	HMDB0014832	C01907				305.386	10	8	23357.3	35987	16640.5	750565	65956.4	556081	90853.1	767933	18274.8	270489	39859.5	339933	23669.8	184630	67617.1	456442	154469	516634	73854	811402	180717	50599	206423	188808	203908	14519.8	31252.2	790208	80172.3	199319	49518.4	13277.6	301349
M611T334	[M+H]+	Daurisoline	0.218638	1.163	0.586831	611.305	333.881	1.34007			Organoheterocyclic compounds	Isoquinolines and derivatives	Benzylisoquinolines	350.372	9	7	2571.03	14534.3	2737.93	26134.4	3712.16	14799.1	10706.7	21749.2	23668.8	18518	5731.36	15959	17463.4	5226.75	5660.7	16601.9	27839.2	16491.6	19687.3	5153.3	22687.4	14884	9093.61	24658.1	6610.56	21809.3	10432.8	22578.7	31076	22894.1	42460.1	16032.2	14416
M677T219	[M+K]+	Decahydrogambogic acid	0.818169	1.33861	0.180324	677.369	218.822	1.65465			Organoheterocyclic compounds	Benzopyrans	1-benzopyrans	220.332	10	10	22953.7	39567.4	26665.4	80715.3	41815.3	111157	51517.3	106192	21733.3	72611.5	68546.9	57591.3	35774.7	53508.5	61198.6	83498.3	88871.5	93517.1	53741.9	93178.8	86002.2	69697	83308.7	81757	63559	39221.5	37515.8	131438	50161.6	81290.2	51616.6	38149	91106.2
M366T298	[M]+	Dehydrocorydaline	0.368708	1.41304	0.19392	366.166	297.631	4.46005		C17790				307.558	8	8	13220	12649.8	5285.47	39471.6	6119.55	20738.1	3734.21	35006.7	11073.4	15234.7	22154.4	24671.9	15238.9	15178.6	25386.4	24634.7	16283.3	19438.6	11620.4	16858.8	13856.7	7660.56	27304	16766.5	12494.9	5642.27	7006.24	32719.8	16091.6	12590.2	24216.4	14243.3	27810.6
M316T128	[M+H]+	Dehydrophytosphingosine (not validated, isomer of 1677)	0.685918	0.745062	0.517907	316.299	128.457	5.42242			Organic nitrogen compounds	Organonitrogen compounds	Amines	136.278	7	7	161534	88512	16196.4	11296	43130.1	20559.8	6443.62	6324.47	15742.1	46706.7	24415.7	5210.28	87056.5	19289.4	26476.8	67769.8	10486	11790.4	18009.2	11729	22366.7	13916.7	16438.8	7916.04	5110.29	10860.2	18328.9	11893.7	32949	39965.8	22062.1	15298.4	11570.8
M252T142	[M+H]+	Deoxyadenosine	1.05478	1.26947	0.392403	252.108	142.1	1.92502	HMDB0000101	C00559	Nucleosides, nucleotides, and analogues	Purine nucleosides	Purine 2'-deoxyribonucleosides	150.047	10	10	184421	792804	71808.3	388996	331172	578895	224246	642993	62563.2	226956	287081	271500	177980	476055	488133	438676	504221	544136	241440	571095	644517	193777	204299	526902	667286	165751	67929.9	651332	263255	369789	271115	412333	348544
M173T190	[M+H]+	Deoxypeganine	0.495517	0.705974	0.309227	173.106	189.881	1.58138		C10656	Organoheterocyclic compounds	Diazanaphthalenes	Benzodiazines	197.879	8	9	4491.01	3116.94	3189.97	79404.5	151629	45579.7	46155	60205.6	8465.69	40889.5	58416.1	24421.6	41678.8	38874	78881	50052.4	60537.9	45520.5	163030	30132	47529.4	29368.9	54851.5	61866.4	17222.5	52012.8	162479	48299.4	48420.8	40407.4	65361.9	31097.6	40334.3
M111T70	[M+H-CH5O5P]+	D-erythro-imidazolylglycerol phosphate	0.750319	1.00751	0.972317	111.054	69.898	1.57895		C04666	Organic acids and derivatives	Organic phosphoric acids and derivatives	Phosphate esters	80.752	10	10	187808	130389	245927	180042	132111	165988	239635	75161.4	45541.4	69289.4	86317.1	127053	87350.4	223702	295342	186987	123985	84426.8	72556.1	85392.6	122891	128809	141676	112034	69877.6	152803	50287.8	54502.5	59780.4	176645	113286	144734	175951
M362T127	[M+H-H2O]+	D-erythro-sphingosine-1-phosphate	6.34334	1.54508	0.362354	362.247	126.651	1.53181	HMDB0000277	C06124	Lipids and lipid-like molecules	Sphingolipids	Phosphosphingolipids	145.158	7	9	1.39749e+06	2.54326e+06	2.69501e+06	255383	1.76361e+06	32533.9	163826	188720	497175	261050	29820.2	684455	585581	396198	51463.2	203271	83175.2	290467	192818	1.2772e+06	136360	1.2569e+06	15902.5	83499.4	1.51924e+06	694712	2.31791e+06	34346	125616	424459	236640	652944	267163
M328T151	[M+H]+	D-erythro-sphingosine c-20	0.948849	0.874474	0.416882	328.32	151.357	2.34573			Organic nitrogen compounds	Organonitrogen compounds	Amines	159.837	10	8	18254.3	28486	33140.1	56960.4	12783.8	58327.6	66906.9	71179.7	89758.4	67252.3	71947.5	75780	86066.3	47995.7	62688.7	52781.3	71652.6	42641.5	65500	40370	69134.7	31360.1	57998.9	61989.9	20668.6	36321.9	18388	56430	53670.5	55792.2	91599.1	45023.3	44463.7
M559T426	[M+Na]+	Desacetyl (7)khivorinic acid, methyl ester	0.136545	0.914591	0.576995	559.227	426.113	1.3031						437.01	9	10	21760.5	12493.1	11721.5	16707.6	11197	20071.7	10399	12723.4	7721.93	12965.5	16038.1	21184.5	10113.8	22809	13361.5	27056.7	12983	16651.6	11747.3	13158.3	15859.5	17132	21555.5	11804.4	16943.7	14015	11604.9	11718.1	9145.89	11350.1	11947.8	14120.6	8740.16
M583T300	[M+Na]+	Desferrioxamine	0.374521	1.19168	0.334355	583.367	300.115	1.66813	HMDB0014884	C06940	Organic acids and derivatives	Carboxylic acids and derivatives	Carboxylic acid derivatives	301.777	9	10	8582.97	4504.39	16086.5	13341.9	7473.45	13940.7	6452.73	11594.7	2011.02	11141.6	8642.97	10312.6	5025.15	10710.9	10790.2	7769.98	11924.7	14343	6954.97	15026.9	9195.98	10278.6	8628.87	7567.58	17313.7	6941.4	8176.22	10693.8	7693.19	9568.14	6175.59	12191.3	7235.2
M600T124	[M+Na]+	Destruxin a	1.57007	0.703346	0.129738	600.356	123.899	2.40213			Organic acids and derivatives	Peptidomimetics	Depsipeptides	130.235	10	7	70985.6	33367.5	7717.92	70542	34481.4	85543.8	132761	107434	111873	138091	95522.9	70639.2	83212.2	57542.4	100396	73034.3	77272.9	72917.4	98247.4	46693.7	113952	58990	89591.6	99922.5	37981.1	74252.3	43589.7	148118	64617.7	69743.4	141614	72558.9	84545.3
M197T213	[M-H2O+H]+	Dethiobiotin	0.41717	0.964588	0.907331	197.128	212.76	5.08131	HMDB0003581	C01909	Lipids and lipid-like molecules	Fatty Acyls	Fatty acids and conjugates	225.871	10	10	159050	14369.8	69423.6	66186.8	71585.7	46372.9	46486.8	22798.9	15734.2	69034.5	40031	46206.2	21315.8	34142.3	88565.8	22395.4	34289.4	22210.9	54374	30740.5	57919.3	21113.6	70271.8	53390.3	18665	18948.4	23552.5	36228	17753.1	47114	26863.8	23959.6	23079.9
M269T204	[M+H]+	Dflnha	0.466857	0.938474	0.761121	269.131	203.52	1.7128	HMDB0014524		Organic acids and derivatives	Carboxylic acids and derivatives	Amino acids, peptides, and analogues	219.413	8	8	131362	4207.97	14587.9	39717	17056.9	40972.5	23890.4	61584.1	37563.1	37336.1	49795.5	16249.2	30959.1	27764	43298.9	38953.8	45760.5	29969.4	36827.2	33892.8	49309.4	25211.9	44851.5	66698.4	8731.71	54754.5	14171	38040.9	28119.2	27253.3	45190.4	28449.6	31500.5
M242T29	[M+H-H2O]+	D-glucosamine, 6-sulfate	0.370473	0.473428	0.418673	242.011	28.521	3.85966			Organic oxygen compounds	Organooxygen compounds	Carbohydrates and carbohydrate conjugates	30.1	6	7	18199	1175.12	32303.7	1267.08	17692.5	577.593	20139.6	984.872	388.192	12980.7	2536.88	4828.79	305.878	26223.3	153282	3527.2	1423.41	478.54	1343.13	43583.4	1540.82	2478.5	2885.73	764.57	1110.26	660.61	668.355	2227.01	735.039	1021.22	946.704	2248.22	3590.82
M178T264	[M+H-H2O]+	D-glucosaminic acid	0.111018	0.937316	0.790598	178.049	263.778	6.84822		C03752	Organic acids and derivatives	Carboxylic acids and derivatives	Amino acids, peptides, and analogues	267.83	8	7	23296.8	3352.73	2995.72	7915.44	2793.99	10240.9	8226.51	12728.4	7858.49	15231.1	13482.9	7962.82	14879.1	10650.3	10819.8	11643.8	15261.4	7513.12	8653.35	6701.22	14328.8	8693.17	14690.7	15577	4110.9	8925.05	2855.03	10208.8	13760.7	7358.3	15756	7133.4	9215.04
M419T208	[M+H]+	Di(2-nonyl) phthalate	0.636141	0.905851	0.641831	419.324	207.753	0.43104			Benzenoids	Benzene and substituted derivatives	Benzoic acids and derivatives	210.533	10	9	8152.1	5951.34	6695.55	47986.6	13879.6	44723.3	50448.1	52104.3	17323.8	59501.6	55074.8	29275.2	43832.7	41255.6	56968.7	40567.7	46586.8	43436.4	48176.4	41577.4	42556.1	30735.7	45981.4	50519.1	22975.7	41328.4	13352.4	30081	34254.4	34516.3	56490.1	34093.8	30522.5
M182T249	[M+H]+	Diboa	0.267879	0.923368	0.641609	182.026	249.45	1.21348	HMDB0033733	C15770	Organoheterocyclic compounds	Benzoxazines	Benzoxazinones	259.429	10	10	48065.3	31588.4	45940.6	31781.9	36061.3	18135.2	24194.5	16250.4	37676.7	21227	28450.7	27959.3	16169.2	15742.4	28692	13652.5	13637.5	20388.4	30826	19554.1	18559.5	30785	20042.8	12271.9	14586.1	12185	38427.8	19883	11074.9	20147.5	16318.2	29911.9	21106.6
M279T68	[M+H]+	Dibutyl phthalate	0.336228	0.869829	0.371069	279.137	68.099	8.18083	HMDB0033244	C14214	Benzenoids	Benzene and substituted derivatives	Benzoic acids and derivatives	80.056	5	6	35289.3	26911.6	42925.8	44456.5	45952.3	43680.9	42670.6	48581.7	55306.7	44515.9	56891.2	45025.5	46830	55220.9	50694.9	45208.2	29692.5	22813.7	43109.7	63451.9	38306.9	46204.4	32581	43310.6	44453.9	9726.93	37299.7	7616.62	16304.7	29870.4	46655.3	38588.6	19816.2
M245T196	[M+Na]+	Diethyl phthalate	0.787196	0.744353	0.133482	245.094	196.308	1.99312	HMDB0094660	C14175	Benzenoids	Benzene and substituted derivatives	Benzoic acids and derivatives	207.182	8	10	130002	14284.8	20835.2	16848.7	29766.1	28355.8	31875.2	29954.9	51829.4	24108.6	34708.5	19821.6	30806	36394.4	37753.4	27411	38278.8	35522.8	13544.1	24622.5	27073.5	15322.6	37691.6	29439.9	20899.4	18319.5	17435.1	12204.3	27910.5	27802.9	36166.6	28194.4	22556.7
M135T239_1	[M+H-C9H10O]+	Diethylstilbestrol	1.33086	0.857347	0.38093	135.091	239.02	3.37989		C07620				249.011	10	10	85140.5	24910	50508.6	100647	43600	157218	89577.5	116510	96788.2	117775	159477	78538	95000.9	123099	173164	130441	163631	97708.8	97064.5	94869.3	118750	61253.8	126252	140126	54088.4	62843.6	40340.2	85295.1	84098	105147	123626	89990.5	102368
M673T446_2	[M+Na]+	Digoxigenin bisdigitoxoside	0.324557	1.05758	0.842031	673.343	445.916	9.74721			Lipids and lipid-like molecules	Steroids and steroid derivatives	Steroid lactones	451.022	8	8	10693.8	8105.42	16968.4	13239.7	20543	50790.6	14521.9	15301.3	9093.57	35625.6	24828.4	14323.2	16569.7	12851.6	29443.6	17941.3	44911.7	21911.1	9161.76	28739.7	17722.7	49867.2	26047	23608.7	10553.8	16860.6	8878.11	17334.1	17132.3	18613.5	36286.5	17475.5	21222.7
M308T107	[M+H]+	Dihydrocapsaicin	4.12569	1.43628	0.294285	308.221	106.858	0.732142	HMDB0038457	C16952	Benzenoids	Phenols	Methoxyphenols	123.782	10	10	828662	447532	1.2787e+06	586115	982169	187684	273571	252747	185189	401211	231302	321423	160452	283388	477829	377679	190689	350452	184957	563634	224237	452820	231633	156636	545001	421612	1.86807e+06	164816	178185	183504	197145	273086	718847
M466T332	[M+Na]+	Dihydrofolic acid	1.05456	0.913447	0.73587	466.159	332.46	1.72732	HMDB0001056	C00415	Organic acids and derivatives	Carboxylic acids and derivatives	Amino acids, peptides, and analogues	339.362	10	10	4090.54	33060.9	11176.9	81413.3	20426.7	130416	26827.9	100088	124237	62777.6	116917	56583.1	83487.6	88486.8	32891.7	39762.2	113046	123516	102402	56310.4	58187	72444.4	27066.2	48294.1	54452.2	36969.9	35300.5	87690.2	37516.6	72269	73190.6	116800	77285.9
M378T298	[M+H]+	Dihydrohaloperidol	0.259561	0.85513	0.412325	378.162	298.352	2.57078	HMDB0060903		Organoheterocyclic compounds	Piperidines	Phenylpiperidines	303.112	6	8	2166.81	9125.49	7074.32	17470.3	14903.5	12939.2	13427.1	14259.7	17345	12725.5	5748.56	14488.9	11417.9	7747.75	8493.85	27620.6	12435.2	23276	14885.8	20775.5	14569.5	8046.09	12386	5261.05	17191.3	2106.39	10260.3	13639.2	8244.27	13458.4	12677.5	6281.18	8125.42
M247T286	[M+H]+	Dimethylallyl pyrophosphate	0.383827	0.858536	0.491447	247.003	285.897	5.62459	HMDB0001120	C00235	Lipids and lipid-like molecules	Prenol lipids	Isoprenoid phosphates	308.272	10	10	6913.41	16153.8	3658.33	8178.16	5672.01	6599.65	14525.8	11753.5	9719.07	13857.7	22803.9	23590.3	27269.7	9208.11	9331.61	16554.1	20284	10679.2	17793.8	8833.24	14749.8	8432.22	9826.75	28329.5	9975.07	15546.8	10265.7	12231.7	38232.8	9831.3	21335.5	19211.3	14372.9
M104T303	[M+H]+	Dimethylglycine	0.443907	0.936027	0.795798	104.07	302.536	2.00255	HMDB0000092	C01026	Organic acids and derivatives	Carboxylic acids and derivatives	Amino acids, peptides, and analogues	317.838	10	10	66831.8	36742.8	34744.3	29953.6	17135.9	4059.92	9193.19	7714.08	40570.8	23255.6	23117	30817.8	33428.1	19180.9	41061.1	6744.57	10916.1	7424.35	24465	21451.1	11862.1	26982.7	13458.4	3837.91	8870.3	12243	34274.2	16846.2	7293.08	17651.7	5748.55	17485.1	21989.9
M142T310	[M+H]+	Dimetridazole	0.990749	0.672173	0.476191	142.085	309.538	2.80873			Organoheterocyclic compounds	Azoles	Imidazoles	316.011	4	5	7096.97	2829.8	10766	4488.88	3194.18	10220.2	168140	152108	72198.8	6019.97	191264	3470.76	207202	116032	18773.2	5199.78	6604.64	166964	177218	5033.71	176422	157385	248698	4286.91	3420.31	159209	10386.2	130200	193375	4334.08	6767.5	147702	148700
M199T235	[M+2H]2+	Dinaciclib	0.369394	1.28766	0.220022	199.143	235.253	1.09072			Organoheterocyclic compounds	Pyrazolopyrimidines	Pyrazolo[1,5-a]pyrimidines	255.604	8	10	3059.22	7103.77	18499.4	25198	12746.1	40255.9	15551.5	18027.7	14891.3	16247.3	72107.9	12884.1	12323.2	20392.3	20320.1	17355.8	34460.7	17167.3	27931.5	10789.1	25565.5	10431.5	13449	15573.1	10187	17418.1	9448.62	13030.3	16710.9	36497.1	14966.5	21207.5	20074.2
M419T149	[M+H]+	Di-n-dodecyl phosphite	0.232966	0.963041	0.887513	419.36	149.246	5.35905			Organic acids and derivatives	Organic phosphonic acids and derivatives	Phosphonic acid diesters	162.585	6	6	16068.2	11762.5	18195.6	18729.7	15419.6	16891.2	41482.7	19257.1	15504.1	17779.4	19366.6	22302.8	49216.2	20375.5	21303.8	10370.6	54860.3	17013.9	17556.6	15124	23432.9	8241.39	10989.9	16405.7	17075.8	20233.4	13060	11115.8	19781.4	10679	28403.8	8972.15	12094.6
M529T33_3	[2M+H]+	Dinor-12-oxophytodienoic acid	2.38644	1.28823	0.565465	529.341	33.238	2.84874			Lipids and lipid-like molecules	Fatty Acyls	Eicosanoids	36.123	8	8	270645	402400	648998	96420.4	361525	51737.9	42631.3	51998.3	91089.5	78570.2	36736.1	137785	95221.6	109174	35956.1	64905.1	45231.3	79020.2	61964.2	243384	46468.6	274243	40073.9	42663.4	380018	156232	476488	10903	52476.7	96592.2	41377.9	213457	87776.9
M334T144	[M+H-H2O]+	Dipivefrine	2.26053	1.52272	0.404191	334.215	143.774	2.35599	HMDB0014592	C06963				151.844	9	9	175098	594149	216652	27124.1	179034	17665.7	49961.1	30946.2	113812	36713.2	8649.44	297190	116373	59511.6	23733.8	54444.2	29258.6	51892.7	29497.1	130836	33769.9	169023	15619.5	23787.3	160447	114780	255538	17173.8	38144.7	98315	65552.5	101424	26914.3
M256T157	[M+H]+	Dipropetryn	1.07453	0.932662	0.738145	256.168	156.873	1.50415		C19101	Organoheterocyclic compounds	Triazines	1,3,5-triazines	164.774	9	10	56821.1	29062.8	33709	125641	31130.4	141916	113058	142582	50966.4	142288	135584	79733.5	132883	113279	144744	106409	136283	112280	114299	129196	124070	78889	118706	136128	62301.2	99105.9	35647.9	113269	102239	96922	166596	92106.2	96474.8
M681T375	[M+H]+	Dipyridamole mono-o-.beta.-d-glucuronide	0.418333	0.778999	0.414856	681.348	374.738	1.05181			Organic oxygen compounds	Organooxygen compounds	Carbohydrates and carbohydrate conjugates	378.11	10	8	4068.55	8310.17	10602.1	5648.21	14227.2	5420.65	4230.78	5071.86	28337.1	6792.51	8495.26	6723.57	5865.44	6352.84	6831.86	4536	5300.28	5562.32	4530.31	3779.63	5440.32	5338.75	3636.21	2942.12	11178.3	4059.16	5783.82	2955.95	2609.19	3239.68	6975.18	9545.73	4075.15
M239T217	[M+H-C6H15N]+	Disopyramide	0.204686	1.07559	0.763482	239.114	216.73	2.94124	HMDB0014425	C06965	Organoheterocyclic compounds	Pyridines and derivatives	Pheniramines	248.537	10	9	8563.71	20186.3	11907.4	25620.7	7243.58	29927.3	27088.6	36347.4	44959.1	28005.9	56277.4	16068.1	21540.1	30794.3	36889.7	56785.6	46765.8	36290	70268.4	8983.39	59323.8	23458.4	49831.3	30270.7	21096	14683.5	24252.3	41844.1	23834.1	29739.6	37637.7	35218	54685.7
M152T260	[M+H]+	Dl-.alpha.-phenylglycine	0.618778	1.05668	0.622283	152.069	260.236	6.5981	HMDB0002210		Organic acids and derivatives	Carboxylic acids and derivatives	Amino acids, peptides, and analogues	261.903	7	7	46073.4	34257.9	60004	83220.1	47139.6	77243.7	61783.1	73941.8	41981.8	80726.3	85569.7	50351.3	48593.6	63577.3	93054.7	77164.5	87852.4	72262.6	54013.7	72969.5	74025	51993.7	72129.7	83096.5	71664	52373.1	56326.4	67169.3	63395.1	69765.6	65955.5	68796.4	65530.1
M130T71	[M+H-CH3ON]+	DL-arginine	0.451783	0.800097	0.390214	130.085	70.6175	3.59665		C00792	Organic acids and derivatives	Carboxylic acids and derivatives	Amino acids, peptides, and analogues	88.038	10	10	322609	101355	298590	77504.8	290334	97641.9	97936.3	77909.7	205244	59673.6	208670	87512.1	78895.6	122074	260319	93171.1	104865	117312	41320.8	155751	84625.4	57879.3	41801.9	48954.7	69407.6	48463.5	165957	83541.6	67512.2	144590	58382.5	135629	129351
M147T387	[M+H]+	DL-glutamine	0.518874	0.94959	0.899272	147.076	387.452	3.49525		C00303	Organic acids and derivatives	Carboxylic acids and derivatives	Amino acids, peptides, and analogues	402.391	6	7	16971.3	15249.7	12127.7	21215	18995.5	29685.7	71163.1	55304.1	142153	27307.1	9637.26	128847	3716.09	59428.6	7530.59	4156.24	17738.4	46349.9	12497.6	65419.5	5398.68	106788	4604.82	5215.17	130268	10783.6	106296	56251.1	5970.12	83520.7	13265.8	51818.9	59450.7
M136T351	[M+H]+	Dl-homocysteine	0.558698	1.01626	0.973197	136.047	351.135	0.257714	HMDB0000742	C05330	Organic acids and derivatives	Carboxylic acids and derivatives	Amino acids, peptides, and analogues	370.355	10	9	370390	12389.8	124537	9615.7	57696.2	40524.5	47329.6	23757.2	12747.5	24617.4	32907	13139.2	9587.22	38718.8	40597.9	41897	14126.8	10079.2	18045.1	77669.2	11363.5	22138.2	39007.6	7120.79	33300.3	6761.27	19140	23227.5	17872.9	19628.9	8109.28	10848.2	23429.8
M236T267	[M+H]+	D,l-n,n-didesmethyl-o-desmethylvenlafaxine	2.95311	1.34538	0.509859	236.185	266.855	3.13661			Organic oxygen compounds	Organooxygen compounds	Alcohols and polyols	268.404	9	9	640046	582213	752572	218125	782110	16448.7	64402.5	17012.2	23452.6	46234	7749.69	232029	211181	182594	34411.4	39542.5	19751.8	120718	85788.6	624744	38180	266873	17537.2	46349.4	738724	271154	851402	12472.3	27358.4	187828	69455.4	507830	98885.1
M134T28	[M+H-CH6O2]+	Dl-normetanephrine	0.468113	0.565425	0.393287	134.059	28.1975	6.71496	HMDB0000819	C05589	Benzenoids	Phenols	Methoxyphenols	29.529	8	7	366017	9198.73	105677	10924.6	109932	5046.71	115917	5459.55	1969.11	76125.8	29015.4	33553.9	4482.98	73288	348614	23925.6	17647.5	6181.98	6778.24	196021	8027.69	38135.4	44575.1	4821.49	6214.34	4526.82	15320.8	14033.9	5452.83	4929.99	3302.69	15289.3	26171.5
M154T97	[M+H]+	Dl-octopamine	0.698507	1.02745	0.934704	154.085	96.5455	0.27753		C04227	Benzenoids	Phenols	1-hydroxy-2-unsubstituted benzenoids	102.71	7	8	432546	70321	146736	118667	120308	106907	67794.4	24790.6	46843.1	39002.2	45711.5	65963.7	33867.5	63160.2	177201	55813.9	13600.6	88802	56116.1	126247	42025.6	35018.9	76322.1	34590.7	22051	42018.4	76709.3	83946.1	11694.4	39341.9	72142.1	29663.9	32935.8
M166T259	[M+H]+	DL-phenylalanine	2.44306	0.958879	0.892632	166.085	259.349	4.21179		C02057	Organic acids and derivatives	Carboxylic acids and derivatives	Amino acids, peptides, and analogues	274.788	10	10	223252	1.12143e+06	2.55721e+06	1.42989e+06	3.46257e+06	1.66232e+06	260326	2.08781e+06	522113	1.1776e+06	724497	547988	98789.2	1.73819e+06	734480	509926	743702	1.93013e+06	1.48364e+06	2.24305e+06	470426	1.83601e+06	605382	122488	2.61395e+06	132494	610942	1.93982e+06	196131	878691	330749	1.80894e+06	530228
M116T312	[M+H]+	DL-proline	4.46816	1.19582	0.711531	116.07	312.255	3.53748	HMDB0000162	C00148	Organic acids and derivatives	Carboxylic acids and derivatives	Amino acids, peptides, and analogues	314.316	10	10	360582	1.39817e+06	4.15727e+06	814435	2.75611e+06	500767	383766	696693	2.25451e+06	358745	345455	469316	151780	451265	628726	596025	315215	413063	364696	391275	365781	462744	348014	153949	471627	162270	1.591e+06	531854	219923	592985	194453	858307	563127
M229T303	[M]+	Dl-tmap	1.63316	0.722388	0.560898	229.154	303.482	3.41329			Organic acids and derivatives	Carboxylic acids and derivatives	Amino acids, peptides, and analogues	310.693	10	10	372088	184471	217404	275967	335693	296155	334155	192325	59773.6	321082	437525	197478	59200.9	353094	1.97414e+06	2.18714e+06	332635	214863	212052	504969	163484	173459	316202	102336	727121	94697	87700.1	285541	57492.1	1.27129e+06	95249.9	281148	294218
M188T259	[M+H-NH3]+	DL-tryptophan	1.24836	0.931576	0.821857	188.07	258.911	3.79814	HMDB0030396	C00078	Organoheterocyclic compounds	Indoles and derivatives	Indolyl carboxylic acids and derivatives	286.357	10	9	57603	307875	734567	578147	891964	635633	105487	847602	81328.3	427904	237717	177737	38677	452566	185179	209174	160759	742341	668590	266592	271100	531932	120444	38656.4	868380	25374.4	230518	1.18049e+06	84247.7	542537	47655	894397	166527
M182T342	[M+H]+	DL-tyrosine	0.797217	0.799596	0.350469	182.08	342.466	3.04729	HMDB0000158	C00082	Organic acids and derivatives	Carboxylic acids and derivatives	Amino acids, peptides, and analogues	358.977	10	10	23537	56190.7	24056.9	44505.9	46404.7	62942.5	27216.2	59724.5	47824.5	59631	59112.1	42999.3	35501.6	39428.3	43150	37521.6	54156.7	88230.3	65948.7	43319.9	40514.5	96835.6	26705.3	52041.1	146778	29576.6	37469.2	210247	57621.8	48854.9	43589.6	141224	37200.2
M236T374	[M+H-H2O]+	D-neopterin	0.390818	1.10833	0.682221	236.091	373.522	6.52319	HMDB0000845	C05926	Organoheterocyclic compounds	Pteridines and derivatives	Pterins and derivatives	375.417	9	10	12504.4	14715.1	43559.3	17079.5	25336.2	10291.1	8418.41	12965.2	17043.6	12172.9	8815.76	12751.4	10270.9	10572.4	12835.1	10791.6	9810.89	9224.3	10715.1	9854.35	8223.12	12365.4	5432.66	10699.1	9705.18	7438.78	35557.9	12164.7	12464.5	9240.62	6297.76	19126.5	9986.12
M340T127	[M+H]+	Docosanamide	0.697393	0.793379	0.364131	340.356	126.616	1.74583	HMDB0000583		Lipids and lipid-like molecules	Fatty Acyls	Fatty amides	136.581	7	10	14165	4807.55	4717.91	15631.9	2689.59	17878.8	21190	19226.3	18871.4	15488	20951.4	21284.9	31057.7	15433.4	13444.7	14859.9	38227.6	21387.2	28578	8040.26	14403.2	10182.7	11240.1	17065.5	5649.53	10806.5	5143.12	14862.6	12799.6	14298.2	33015.2	14087.6	12105.4
M376T157	[M+H]+	Docosatetraenoyl ethanolamide	0.850763	0.658445	0.490252	376.33	157.445	0.34718	HMDB0013626		Organic nitrogen compounds	Organonitrogen compounds	Amines	166.646	10	7	19499.5	222539	23963.3	12255.2	176314	14707	17086.4	7983.05	18481.5	27355.9	36905.1	18165.2	51936.8	22512	25188.5	13327.6	19309.2	7190.27	24442.1	7720.66	19014.7	12398.5	15695.1	13384.9	3948.41	18513.2	31729.4	15837.2	11546.8	5295.25	24707.8	203064	11442.4
M116T272	[M+H-C12H22]+	Dodemorph	1.96815	0.712849	0.263778	116.106	271.959	3.45041		C18786	Organoheterocyclic compounds	Oxazinanes	Morpholines	281.762	10	10	73795.9	20441.5	36648.9	122053	27321.4	161010	206295	122887	289476	179534	214890	120292	106078	170134	411605	113626	210057	121229	122926	138741	141832	68866	213349	128991	35112.3	74531.9	34446.5	141707	121485	112686	201753	63553.3	140135
M280T388	[M+H]+	Doxepin	3.99647	2.37982	0.25724	280.174	388.05	4.32358		C06971	Organoheterocyclic compounds	Benzoxepines	Dibenzoxepines	390.195	4	7	477628	413331	1.71623e+06	178320	421019	27564.8	41428.2	15271.9	34586.7	126644	35074.1	85614.2	187327	56414.8	36764.1	29104.4	27579.2	82924.5	125874	323220	40265	797250	31433.5	39327.8	260892	192803	692732	22451	33078.3	66340	17115.4	316046	87384.7
M445T27	[M+H]+	Doxycycline	1.06774	1.37491	0.420626	445.178	26.537	3.04378	HMDB0014399	C06973				50.807	10	7	39845.1	78275.5	78353.3	15480.5	70588.6	15245.7	14238.9	6581.4	11445.2	6931.76	6630.19	29180.2	21536.7	20311.1	9735.14	11643	6686.96	10824	13962.1	36441.2	8825.13	44077.9	4668.81	7483.75	48034.2	30147.7	65389.9	7440.02	8358.15	18790.3	16382	32416.5	9447.72
M318T235_2	[M+H]+	Drofenine	0.163721	1.0553	0.635932	318.241	234.661	0.781288						237.018	10	10	18816.5	17325.7	21553.4	16084	18070.1	19843.1	22708.4	26688.6	11237.5	23770.9	21980.6	28769.8	28971.1	14090.8	26037.5	21888.4	20544.2	15834.1	23012.8	25743.2	21576.7	21064.4	18403.4	18950.1	23906.4	22261.6	21815.8	17539.7	16581.5	24920.1	28546.2	12075.5	19144.2
M151T103	[M+H]+	D-xylose	0.623851	0.86627	0.713261	151.06	102.578	5.22981	HMDB0060254	C00181	Organic oxygen compounds	Organooxygen compounds	Carbohydrates and carbohydrate conjugates	106.26	10	10	1.69971e+06	101327	862573	242097	470902	213199	615665	161262	237042	338710	291737	199292	129940	184176	1.31357e+06	196396	231594	230652	639421	399783	169323	342554	217046	275178	183606	183195	139017	192997	215683	169739	355070	317974	105143
M186T266	[M+H]+	Ecgonine	0.073954	1.06302	0.728431	186.111	265.726	3.36262		C10858				289.157	10	10	37810.9	21676.7	24868.6	19509.6	22446.7	23967.9	18830.9	29691.1	31920.4	25619.2	27226.7	16246.5	22997.8	21006.6	31798.7	20203.8	29137.8	29888	19160.9	26028.4	22184.5	14159.9	23146.8	23949.9	45973.7	14251.1	23959.5	21815.3	18138.9	19067.3	29614.7	17333.5	14915.3
M455T52	[M+H-H2O]+	Echinocystic acid	2.10204	0.65839	0.221999	455.332	52.413	1.43635		C08942	Lipids and lipid-like molecules	Prenol lipids	Triterpenoids	53.287	8	6	128366	82307.4	140992	86542.7	142255	116035	67785.7	87059.2	542665	89446	159604	134705	107909	224419	180091	92153.4	116206	78142	94047.2	231055	77545.1	94843.8	235430	85265.1	123150	61752.9	174987	67614.5	55490	76329.4	68902.7	128714	125625
M657T203	[M+Na]+	Echinocystic acid 3-glucoside	0.179058	1.18425	0.322805	657.393	202.703	1.16201			Lipids and lipid-like molecules	Prenol lipids	Terpene glycosides	219.273	7	5	13499.7	13467.2	20936	13364.6	6984.52	12341.1	6520.75	25493.6	29320.6	22136.2	14663.8	13237.1	7487.27	14461	9798.22	14533.5	15196.1	15405.2	13670.7	17256.4	9403.16	14244.8	14258.7	12527	11714.6	12166.6	14158.7	9878.04	13275.9	7743.37	15488.5	12511.6	12243.8
M143T337	[M+H]+	Ectoine	1.57903	0.968813	0.913004	143.081	337.14	2.66464		C06231	Organic acids and derivatives	Carboxylic acids and derivatives	Amino acids, peptides, and analogues	340.202	10	10	9.55476e+06	393451	727944	209636	433690	109233	201510	125691	596904	189698	119598	123523	136048	203250	224644	290085	146443	175700	118489	292177	131621	245445	214844	112385	353910	320858	573521	109235	102092	180901	112810	357954	245778
M278T263	[M+H]+	Eddp	0.50886	1.17167	0.338404	278.211	262.971	0.20967		C16659	Benzenoids	Benzene and substituted derivatives	Diphenylmethanes	265.514	10	10	34834.9	31839.9	26816.9	19093.8	24264.4	13546.6	14574.5	11533.1	6486.47	17290.6	13381.8	29075.4	20937.5	16144.4	14052.9	13203.4	14319.9	17102	10367.1	26297.5	17518	20191.5	17657.2	14687.5	32627.2	19539.9	28524.6	6130.68	13871.6	18371.8	17291.2	18961.1	9485.94
M405T33	[M+H]+	Enalaprilat tert-butyl ester	3.20396	1.05538	0.883496	405.251	33.239	3.97865			Organic acids and derivatives	Carboxylic acids and derivatives	Amino acids, peptides, and analogues	49.26	10	10	745678	1.46053e+06	1.28528e+06	321754	1.86105e+06	127974	282278	192026	249569	301755	213956	1.2904e+06	413298	461561	122423	225214	238930	355506	332918	991487	241126	2.0725e+06	164722	183121	1.4496e+06	641944	1.34196e+06	138061	183864	646504	374794	1.10689e+06	226717
M690T249	[M+Na]+	Enniatin a1	0.137971	0.997976	0.990119	690.413	249.322	2.28543			Organic acids and derivatives	Peptidomimetics	Depsipeptides	251.086	7	9	4042.74	5898.15	10652	13912.5	12529.9	13529.2	8531.06	9908.48	8265.16	13898.9	9458.13	5814.06	4867	11310.2	9853.41	6788.29	10635.1	13012.4	6869.99	12746.3	9213.35	7789.64	19037.6	6283.37	27036.2	3973.86	3726.64	11027.8	5258.57	6839.19	8757.29	6505.07	5517.55
M676T249	[M+Na]+	Enniatin b1	0.326139	0.997572	0.992047	676.433	249.45	2.01947			Organic acids and derivatives	Peptidomimetics	Depsipeptides	251.76	9	8	2804.37	3484.55	3138.37	11403.9	3111.84	13232.4	9926.15	17923.7	3237.5	10060.5	14494.3	10006.2	9827.36	11385.2	11202.3	14213.2	15168	16496.1	12790.7	9647.93	13800.4	9921.42	14085.8	13922.8	8261.66	5918.42	5191.76	12963	12201.6	13103.9	8497.75	15736.4	15105.6
M360T310	[M+H]+	Enrofloxacin	0.266339	1.26154	0.197511	360.19	309.85	3.58197	HMDB0029861		Organoheterocyclic compounds	Quinolines and derivatives	Quinoline carboxylic acids	311.408	8	10	11945.7	6995.66	13924.5	24564.8	9656.19	11661.4	9587.05	29701.2	15260.2	13608.8	11132.3	7021.88	8587.91	13339	14464.1	12452.3	21324.1	8284.19	14881.4	15028.7	14402.6	12197.6	8334.71	25427.5	19922.4	16480.9	9218.84	11376.7	13951.2	15310.9	22062.5	15102	21241.1
M504T330	[M+Na]+	Entacapone 3-.beta.-d-glucuronide	0.286963	0.89349	0.849491	504.115	329.715	1.32302			Organic oxygen compounds	Organooxygen compounds	Carbohydrates and carbohydrate conjugates	335.707	10	10	2675.17	5670.91	5411	10688.4	5718.22	14821.2	12057.2	17636.4	21330.1	7831.11	86510.9	17464.4	22161	87473.7	18959.6	8108.39	15109.4	14615	8220.06	62063.5	12433.5	7117.1	18352.2	6125.64	32793.6	6999.58	14428.3	8601.03	4576.25	8619.62	11446.1	16389	7486.75
M148T202	[M+H-H2O]+	Ephedrine	0.554459	0.822063	0.192445	148.111	201.536	4.52329	HMDB0015451	C01575	Benzenoids	Benzene and substituted derivatives	Phenylpropanes	205.993	10	10	15796.7	5084.47	20084	18081.5	13996.8	19944.3	16887.2	20360.6	18900.1	21337.6	23518.4	19270	21560.7	30611.3	31937.3	19594.7	33089.1	32527.5	21315.6	16446.6	18572.7	14076.2	20245.3	20132.2	19052.5	15647	16028.4	18447.3	17271.5	23789.3	38177.8	24733.6	22905.8
M526T470	[M+H-H2O]+	Epirubicin	0.601899	1.68504	0.472946	526.172	470.317	0.553927	HMDB0014588	C11230				475.439	9	7	16858.9	7101.5	23762.3	149223	25025.3	12717.4	31844.7	16949.2	7073.76	14733.9	7215.08	16594.9	4481.03	8414.64	41321	11632	8990.67	34483.3	7674.72	27671.5	5260.42	5648.35	12279.6	6864.2	12486.1	4502.77	6486.7	22103.5	6397.25	6469.76	6631.95	6231.82	9405.57
M397T382	[M+H-H2O]+	Eplerenone	0.465342	0.876637	0.586083	397.216	382.383	5.73889	HMDB0014838	C12512	Lipids and lipid-like molecules	Steroids and steroid derivatives	Steroid lactones	397.667	5	6	6745.43	7074.21	4330.8	11547.1	6661.27	20539.6	13967.6	34531	17402.5	21823.7	14704.9	13429.5	16972.1	32568.8	15823.1	9113.11	28007	16234	15834.9	14938.1	20984.7	38528.3	13907.6	14859.2	12628.5	17405.8	13572.8	10477.5	17289.1	14865.5	24350.4	19680.1	15304.4
M420T241	[M+H-C3H4O3]+	Epothilone b	0.704258	0.634736	0.0924057	420.273	241.431	8.6743		C12154	Phenylpropanoids and polyketides	Macrolides and analogues	Epothilones and analogues	265.915	9	9	13438.9	18867	10857.8	22568.1	10204.3	25002.8	43154.4	16402.5	22066.1	35435.6	49554.8	25147	37690	20053.2	72641.4	30111	13211.7	23214	28935.3	10211	50488.9	27973.8	35067.7	13885.1	14106.5	22655.4	11102.8	9975.21	10507.2	23108.2	29115.7	20122.2	12350
M227T79	[2M+H]+	.epsilon.-caprolactam	0.766155	1.22225	0.418799	227.175	78.688	1.58015	HMDB0062769	C06593	Organoheterocyclic compounds	Lactams	Caprolactams	82.944	8	5	47544.2	55969.8	43201.3	39336.3	104620	35703.3	34496.9	47739.8	23251.7	31581.9	7611.99	55860.8	29391.1	35293.9	24213.1	33168.6	22550.5	8609.4	37821.6	42705.9	40569.1	41257.2	13621.8	36671.9	33163.3	27929.1	21785.7	10288.6	80556.5	8706.44	46973.3	29597.7	41968.5
M269T394	[M+H]+	Equilin	0.629199	1.15424	0.669288	269.149	394.045	0.0646025		C14392	Lipids and lipid-like molecules	Steroids and steroid derivatives	Oxosteroids	414.314	7	9	87344	75897.9	22530.8	131034	115072	64297.8	97997.2	140252	37236.4	109405	85718.8	140123	234069	36180.8	65788.2	58296.7	44934.5	119337	107009	157357	82826.7	62787.7	48338.6	57667.4	186501	52791.9	35191.9	60794.3	75898.8	85551.8	41843.4	55773.5	116170
M548T290	[M+H]+	Ergosine	0.162588	0.959954	0.829809	548.267	289.782	0.188914		C09167	Alkaloids and derivatives	Ergoline and derivatives	Lysergic acids and derivatives	310.618	9	8	4873.25	8576.94	10012.7	10772.6	10900.8	8030.12	2958.7	13187.6	3386.45	5719.01	12353.3	27093.4	4925.16	11186.1	7584.34	8096.72	9333.8	8467.97	7197.85	10539.8	9622.36	6588.49	7318.19	12053.2	15326.8	4371.45	4234	13400.4	5988.62	8295.43	13694.7	11385.6	5325.72
M459T304	[2M+H]+	Ergothioneine	0.0864736	0.948855	0.7504	459.185	303.912	5.1657	HMDB0003045	C05570	Organic acids and derivatives	Carboxylic acids and derivatives	Amino acids, peptides, and analogues	310.466	7	6	2179.24	7249.34	13063.3	5913.41	10411.1	15948.3	1784.86	9815.82	14780.7	11210.9	3768.3	21624.2	7907.15	9670.65	15557.6	5424.74	11595.8	15167.7	11327.6	15741.5	3872.33	8917.01	3460.57	10159.1	30513.6	7893.73	8157.86	15957.2	3523.58	9026.9	1788.86	12302	4235.77
M1031T449	[2M+Na]+	Erlose	0.836633	5.35115	0.212577	1031.32	449.243	2.15654			Organic oxygen compounds	Organooxygen compounds	Carbohydrates and carbohydrate conjugates	460.045	9	6	3751.2	842.971	1817.23	165277	5891.71	35274.7	4975.67	21932.1	1147.79	6769.35	2691.32	14988.6	606.445	6537.44	4080.65	58889.1	5289.14	27393.7	1665.19	108875	10439.3	946.766	21688.5	7049.27	43716.1	667.889	855.563	37447.1	2132.08	17190.9	5182.97	1261.42	8449.26
M338T34	[M+H]+	Erucamide	0.511643	1.03837	0.843275	338.34	34.455	1.58049			Lipids and lipid-like molecules	Fatty Acyls	Fatty amides	68.648	10	10	1.15301e+06	559190	533498	1.32851e+06	694671	1.35254e+06	899351	625895	584582	1.17231e+06	1.96253e+06	583280	1.78147e+06	1.17065e+06	779769	972675	1.61219e+06	1.1649e+06	548069	928177	506476	1.30838e+06	1.02828e+06	1.19848e+06	1.01906e+06	896100	837518	759775	1.98164e+06	430109	870056	711264	919468
M368T265_2	[M+2H]2+	Erythromycylamine	1.4622	1.32023	0.543404	368.262	265.401	1.61027			Organic oxygen compounds	Organooxygen compounds	Carbohydrates and carbohydrate conjugates	279.098	8	9	148504	153943	190067	55046.1	196068	1169.7	15443.5	5387.77	1747.94	12418.1	3157.02	51648.6	46411.7	44115.7	10113.1	9512.49	5590.06	33428.2	28592.6	148484	10919.4	75938.4	2450.65	11861	217163	60112.5	208934	1981.76	7556.62	46503.9	19107.6	131330	25280
M420T303	[M+H]+	Esfenvalerate	1.05646	0.650265	0.164897	420.159	302.618	0.368383	HMDB0031791	C10988	Lipids and lipid-like molecules	Fatty Acyls	Fatty acid esters	310.525	10	9	11162.1	3258.77	13185.6	13110.3	2140.46	59629.7	20147.2	43687.9	16424.8	22146.1	42440.2	32987.8	69657.5	34436.5	61155.4	52460.4	42665.2	27828.8	21144.4	2304.24	54083.2	12850.1	39150.6	60601.4	11228.6	32826.2	11318.7	24689.2	70971	24382.4	50004.5	27374.8	30678.4
M271T157	[M+H]+	Estra-1,3,5(10),7-tetraene-3,17.beta.-diol	0.53577	1.05723	0.776074	271.18	157.236	0.783613		C14485	Lipids and lipid-like molecules	Steroids and steroid derivatives	Hydroxysteroids	166.313	10	10	19141.5	42002.8	21360.2	81002.8	28615.5	71508.6	63816.8	72261	23333.6	71189.8	76622.1	38913.6	60779.5	53258.6	80715.1	63738.1	93618.9	71551.6	62385.3	39421.2	70637.9	38726.6	68125.9	84864.7	25304.2	55935.8	44478.7	59171.6	69938.8	47456.7	89266.5	47705	54005
M352T148	[M+H]+	Ethanone, 1-(5-hydroxy-1-pentyl-1h-indol-3-yl)-2-(2-methoxyphenyl)-	0.494444	1.0371	0.919367	352.169	148.273	1.24336			Organoheterocyclic compounds	Indoles and derivatives	Phenylacetylindoles	156.657	10	8	58165.6	5120.79	67135.8	22057.4	61751	16249.3	18946.3	20028.2	3815.07	14941.4	14603.9	12318.8	21088.8	11142.9	20910.6	21566.3	27842.8	14635.2	17262.4	12828.6	18329.1	16369	17144.8	16471.7	27648.9	24801	49486.7	14276.1	11495.9	16177.8	19554.8	19050.4	19055.2
M142T130_2	[M+H]+	Ethosuximide	3.07474	0.72816	0.113697	142.096	130.069	2.56155	HMDB0014731	C07505	Organoheterocyclic compounds	Pyrrolidines	Pyrrolidones	148.162	10	10	179480	66382.8	83031.1	284223	109168	363209	257862	376580	566746	350496	398774	254349	555399	410326	504246	285545	344457	297838	270309	244399	366270	161482	242295	305036	146312	379881	79524.8	257713	314820	308212	422591	244482	248589
M218T33	[M+H]+	Ethoxyquin	4.91181	1.60397	0.421236	218.153	32.588	4.58744	HMDB0039531		Organoheterocyclic compounds	Quinolines and derivatives	Quinolones and derivatives	33.762	10	10	976018	859150	3.0172e+06	255408	1.12382e+06	51731.1	151673	71280.4	330874	354527	76271.1	384094	292995	317265	67160.7	168111	92832.6	167955	148377	757718	120257	665988	126706	73646.5	1.48529e+06	406391	1.23964e+06	80673.5	122283	322323	131346	501965	305709
M553T269	[M+H]+	Euphorbiasteroid	0.733275	0.880812	0.567263	553.3	269.389	0.579438			Lipids and lipid-like molecules	Prenol lipids	Diterpenoids	282.799	10	10	20253.1	14270.7	16792.7	41753.7	17771.7	60281.5	41847.8	51499.8	58414.6	40073.6	51239.9	34019.7	29329.7	43876.4	57209.6	34587.6	68307.4	61133.5	35469.3	35876	48629.3	25448.9	58557.2	54490.2	13637.7	29490.6	14249.3	49002.5	41246.8	32339.2	79692.7	32040.8	35032.6
M671T470	[2M+H]+	Fenamiphos sulfone	0.405424	1.16469	0.607955	671.198	469.971	0.160826			Benzenoids	Benzene and substituted derivatives	Benzenesulfonyl compounds	473.829	8	5	14936.1	7835.05	9235.82	50506.9	11678.7	31529.7	15161.2	26725	9638.73	18006.2	23533.2	43440.5	7161.99	15135.9	22678.5	19111.1	21763.6	35463.4	13488.9	36156.8	27684.6	15205.3	19287.8	18148.7	22103.3	5320.23	24055.3	37858.8	10125.3	23359.8	9690.32	12209	17823.2
M255T236	[M+H]+	Fenbufen	0.413673	0.971437	0.892422	255.112	235.618	0.544366			Organic oxygen compounds	Organooxygen compounds	Carbonyl compounds	247.554	10	10	9308.57	8495.97	13837.3	26559.4	6391.24	27582.4	20660.5	41608.5	23090.8	26784.3	38888.3	36933	29967.2	29491.4	38851.7	37821.7	34622.1	33045.1	29831.1	26565	41695	16249.7	54370.6	65822.7	23827	43929.2	13477.5	24853.3	28029.5	32348.6	46383.7	28999.4	34268.4
M316T375_2	[M+H]+	Fendiline	0.198377	1.12254	0.699451	316.222	375.365	0.651075			Benzenoids	Benzene and substituted derivatives	Diphenylmethanes	382.533	5	5	5564.46	13013.9	2859.47	22048.5	2036.73	21747.7	2633.91	24853.8	11164.7	5030.2	18958.9	12398.3	5561.62	18949	20835.8	5990.77	25487.5	3417.34	19483.7	15168	18713.2	16986.8	17142.8	3050.83	15254.8	12803.9	1881.12	2711.73	4433.65	2550.95	5805.37	18261.9	1903.73
M304T149	[M+H]+	Fenpropimorph	0.127502	1.08825	0.766802	304.262	148.805	1.28521	HMDB0037270	C18787	Benzenoids	Benzene and substituted derivatives	Phenylpropanes	158.266	10	10	29871.2	46346.6	25095.4	25882.2	63130.6	30309.8	25278.6	21285.2	23124.4	38338.7	26388.2	28549.8	20639.2	27162	62591.4	48108.5	105994	43783.8	24040.5	29214.1	32567.5	69331	23623.8	38725.7	31699.4	22165.6	29088.9	21093.1	37328.6	22328.9	23557.4	22182.2	27506.2
M688T205	[M+H]+	Ferrichrome	0.213324	0.995969	0.978788	688.333	204.998	1.49799		C06228	Organic acids and derivatives	Carboxylic acids and derivatives	Amino acids, peptides, and analogues	223.95	10	9	2770.57	4913.46	3505.46	10677.4	5173.25	12387.5	10147.5	10500.4	6101.47	13066.2	7903.99	18487.4	10772.9	7020.68	11079.1	7013.28	10089.9	9979.7	10228.8	12453.5	15412.4	6435.44	10398.9	8784.01	4544.31	5373.73	2985.4	11408.1	7637.94	12309.4	13851.8	8937.29	8129.04
M265T256	[M+H]+	Feruloyl putrescine (isomer of 1178)	0.10297	1.02429	0.884415	265.154	256.334	0.967743	HMDB0139638	C08184	Phenylpropanoids and polyketides	Cinnamic acids and derivatives	Hydroxycinnamic acids and derivatives	267.585	9	8	33671.9	12355.8	15126.7	26591.4	17327.1	13208.9	15105.9	19448.1	16206.5	16142	22450.9	31194.5	15217.8	20305.8	38280.2	51204.6	16706.4	17891.5	17984.5	13798.8	42972	14873.3	18418.1	22325.8	12965.2	37221.2	13047.1	21436.9	18674.1	14131.8	17547.1	22389.4	25480.6
M314T48_2	[M+H]+	Feruloyl tyramine	0.322754	0.666783	0.115075	314.137	47.749	3.36901	HMDB0029365	C02717	Benzenoids	Phenols	Methoxyphenols	71.37	6	6	15983.9	14023.9	19046.5	13490.1	36697.9	18018.4	12339.2	19334.6	9351.11	29497.5	21835	16735.6	17086.4	20996.1	24405.1	17855.8	20841.5	37968.3	16549.9	21243.8	194633	72912.9	16967.2	23384.6	14534.5	22352.9	13350.8	15866.1	26496.4	17712.3	25275.6	23457.3	18430.9
M502T232	[M+H]+	Fexofenadine	0.182863	1.01904	0.898131	502.289	231.686	0.999431	HMDB0005030	C06999	Benzenoids	Benzene and substituted derivatives	Diphenylmethanes	237.478	8	3	14255.7	10221	9353.01	24537.3	15773.5	17039.9	19964.9	13856.1	12302.7	20188.8	20837.3	16519.1	13226.2	10389.3	12055.5	23069.4	19831.2	13151.2	25608.1	19062.1	24057.6	31393.1	15006.8	17398.2	20455.1	11411.2	15344.6	32123.6	14121	29005.2	12181.4	19939.2	24213.1
M372T371	[M+H-NH3]+	Finasteride 2-(2-methylpropanol)amide	0.201585	1.0343	0.89012	372.272	370.604	0.671911			Lipids and lipid-like molecules	Steroids and steroid derivatives	Androstane steroids	372.681	6	6	2181.52	9115.87	6049.77	1691.68	8176.29	920.066	1612.7	4700.76	6216.46	1232.46	5746.64	2531.16	5671.42	2048.41	4847.76	5632.99	5819.68	1518.51	1352.86	3575.33	6113.47	4326.59	5633.14	5030.34	6047	2724.09	8991.64	4622.27	5906.17	1521.14	764.994	3303.71	4996.72
M345T225	[M+Na]+	Flavanone diacetylhydrazone	0.764149	0.758264	0.187757	345.141	224.746	0.064871			Phenylpropanoids and polyketides	Flavonoids	Flavans	227.511	10	10	11370	27233.9	3984.56	17428.7	16944.3	20519.8	25075.7	39424.1	31975.6	26546.9	26315.2	56255.7	55175	15763.4	24407.5	44054.9	22020.8	25164.8	37372.7	24579.7	41587.8	19091	20139.4	39402.5	14762	33604.3	5179.13	28732.2	31447.4	37362.5	38630.9	26765.5	16005.2
M439T615	[M+H-H2O]+	Flavine mononucleotide	0.756155	1.60238	0.436911	439.085	615.361	1.55014	HMDB0001520	C00061				632.842	10	10	8379.53	14959.1	63189.7	25648.9	42546.6	19019.7	13953.6	7803.69	16048.8	19746.9	20733.3	19691.6	19672.2	33100.1	18337	22320.4	5108.83	6810.84	53505.5	5504.85	4810.06	5888.29	7489.07	6759.44	5427.26	6091.34	8953.87	7417.64	6845.15	6768.64	4147.93	11079.3	3299.22
M527T52	[M+H]+	Flavone base + 3o, 2meo, o-guaiacylglycerol	0.796811	0.968893	0.927898	527.152	51.617	2.04773			Phenylpropanoids and polyketides	Flavonoids	O-methylated flavonoids	52.477	10	10	63062.3	27060.5	47800	38124.9	70395.6	30226.5	22962.5	30215	132175	27357.5	27238.2	16627.5	60265.3	17904.3	24234.9	14404.8	9544.5	21013.1	41273.9	23813.1	32590.5	54888.3	92476.5	21740.3	45628.5	86736.5	45565.4	10005.5	10165.1	27596.5	31439.5	23537.6	35058
M194T88	[M+H-C3HF3N2OS]+	Flufenacet	0.506443	0.845624	0.444888	194.103	88.455	0.409353		C18731	Benzenoids	Benzene and substituted derivatives	Anilides	90.951	10	10	387961	49698.1	172124	77950.4	98121.9	78928.8	114220	84476.3	51981	84480.5	119914	82568.9	49527.3	106284	248760	77698.1	84480.9	86508.5	71405.4	155121	86750	72780.2	85343.9	74820.9	91261	49689.7	61877.2	72203.4	54729.7	82943.1	94178.9	89502.3	70838.1
M276T203	[M+H-C2H4]+	Flumazenil	0.542392	0.618032	0.14183	276.068	203.28	3.40504	HMDB0015336	C07825	Organoheterocyclic compounds	Benzodiazepines	1,4-benzodiazepines	228.542	8	9	46041.5	4157.85	5035.63	8199	19423.1	8115.71	4191.88	13255.4	34221.4	9050.62	13556.7	7120.59	3026.38	16186.4	35398.6	6992.05	6430.08	5686.73	3948.31	11490.8	9558.84	7218.65	10495.8	8255.51	2469.82	6681.87	9966.81	4830.05	7702.46	8931.42	3650.1	11914.6	10294.2
M435T264	[M+H]+	Flunisolide	0.478865	1.2015	0.439477	435.219	263.906	1.34738	HMDB0014326	C07005	Lipids and lipid-like molecules	Steroids and steroid derivatives	Hydroxysteroids	267.921	8	9	40671.4	21522.2	24971.4	11607.2	28727.4	12281.2	11805.5	12542.9	11241	8616.07	10268.5	17524.2	4576.46	15785	3136.71	8393.78	7465.2	14999.3	13619.2	22101.7	10768.6	12519.7	2433.97	9231.32	22255	12117	22770.7	10878.8	4483.33	4876.29	13834.3	18184.3	8913.54
M438T449	[M+H]+	Fluphenazine	1.01023	0.775446	0.426735	438.17	448.822	0.121353	HMDB0014761	C07010	Organoheterocyclic compounds	Benzothiazines	Phenothiazines	451.752	10	9	25429	8455.83	8351.55	31545.3	8764.42	44752.9	64601.8	113715	91802.9	54477.5	66815.6	53675.2	144478	37146.8	84656.6	90388.6	54048.7	35720.8	73379.3	25018	80285	26040.4	65932.4	62089.1	16812.3	152954	13536.9	72326	92378.3	49253.4	163695	50612	49340.6
M473T259	[M+H]+	(+)-fluprostenol methyl ester	0.484408	1.21361	0.319776	473.237	258.876	1.45303			Lipids and lipid-like molecules	Fatty Acyls	Eicosanoids	271.376	10	10	16931.4	20716.7	17535	28428.9	37049.4	25267.2	14535.6	53465.2	14645.8	25117.6	20784	33520.3	17573.4	31048.8	39377.5	24002.5	31097.8	35111.9	17215.9	77587.3	51491	41661.6	28607.2	20897.7	50268.4	18951	24904.1	20966.9	20147.7	25438	23154.3	28598.7	24503
M316T375_1	[M+H-C7H11F3O4]+	Fluprostenol serinolamide	0.125798	1.03514	0.801229	316.185	375.128	2.98514			Lipids and lipid-like molecules	Fatty Acyls	Eicosanoids	377.524	10	10	21300.4	43360.5	19175.7	40677.5	27168.5	37996.3	25612.5	43509.2	28587.9	45179.6	36101.8	29075.9	29226.3	32649.2	41664.9	28110.9	48062.2	36993.7	33136.9	27018.9	34916.8	32431.8	30239.2	28614.1	26036.4	23582	22682.7	29150.2	33054.5	28002.3	33873.2	32092.7	30851.6
M316T425	[M+H]+	Flusilazole	0.58613	1.12812	0.589837	316.102	425.139	4.50157	HMDB0039815	C18733	Benzenoids	Benzene and substituted derivatives	Halobenzenes	437.351	10	10	27679	42938.3	36062.8	13918.3	35077.3	18158.1	24102.4	9113.96	12968.7	27433.3	23451	14035.6	19399.2	15956.7	17515.4	10297.3	10231.5	11583.5	9303.43	25994.1	11063.9	12314.3	10417.5	15524.8	16719.6	17235	49776.8	10589.3	11556	12079.4	15895.1	20965.8	8979.03
M277T251	[M+H]+	Flutamide	0.793208	0.814428	0.151101	277.089	250.772	1.62471	HMDB0014642	C07653	Benzenoids	Benzene and substituted derivatives	Trifluoromethylbenzenes	253.544	6	8	15840.9	49133.1	16673.9	25191.8	25347.7	26475.4	46814.6	36336.8	63134.8	32156.8	43013.5	41021.9	45724.7	48518.5	53806.4	37981.9	25785.8	26682.1	41000	37196.5	31960.6	25326.1	31979.9	30676.6	25973.7	33609.7	26397.8	25778.1	28902	28445.5	26845.2	28011.6	38071.2
M434T391_2	[M+Na]+	Fluvastatin	2.26257	1.0581	0.810445	434.189	390.626	0.166358		C07014	Organoheterocyclic compounds	Pyrroles	Substituted pyrroles	393.766	10	10	1.1468e+06	3.60264e+06	3.65726e+06	4.04209e+06	4.03096e+06	4.73455e+06	1.21371e+06	4.25744e+06	3.62028e+06	3.33009e+06	8.27223e+06	3.03771e+06	1.9454e+06	7.43157e+06	2.96789e+06	1.4105e+06	4.11894e+06	4.71113e+06	3.75331e+06	6.43452e+06	2.1034e+06	3.5105e+06	1.7952e+06	1.05223e+06	6.48991e+06	1.37962e+06	4.82994e+06	2.43739e+06	1.04005e+06	2.79742e+06	2.2115e+06	5.35913e+06	2.16442e+06
M559T216	[2M+Na]+	Formononetin	0.396568	1.39088	0.692081	559.149	215.917	0.673851	HMDB0005808	C00858	Phenylpropanoids and polyketides	Isoflavonoids	O-methylated isoflavonoids	245.283	10	5	3833.3	1631.82	3258.68	6732.79	2300.92	25522.6	1528.69	5677.67	4009.17	4364.11	57364.4	3183.66	3091.54	83451.6	21562.3	23479.9	35991.7	39601.6	5346.77	138622	4657.64	6168.82	50874.5	6768.17	77650.1	3058.1	3358.17	10995.8	7185.86	11111.9	7936.14	6748.77	2676.79
M345T178	[M+H]+	Formoterol	0.12809	1.13482	0.360688	345.187	177.639	0.577559	HMDB0015118	C07805	Benzenoids	Benzene and substituted derivatives	Phenethylamines	186.515	8	8	26836.6	16407.9	19309.3	17505.9	3524.4	24428.5	13631	24477	19093.1	15735.3	20230.6	20738.7	28419.3	29757.6	14046.7	21466	20812.1	18061.5	15543.1	28613.1	35336	24672.4	17083.6	12219.3	7768.72	21092.7	34584.9	22054	13706.8	22445.3	22325.8	15215	16338.5
M615T69	[M+Na]+	Fortunellin	0.456743	1.1968	0.526272	615.169	69.186	3.50786			Phenylpropanoids and polyketides	Flavonoids	Flavonoid glycosides	75.86	8	5	22549.7	26660.6	29412.7	59902.2	23388.9	28504	10728.2	15373.2	21068.5	39216.9	27169.2	12909.6	24343.5	25532.7	21504.7	21972.3	10333	25421.4	5909.21	9875.79	3116.57	9947.12	18464.7	12032.4	5740.58	62485.6	39671	4810.19	6643.09	17968.4	21510.9	21324.5	8560.82
M395T34	[M+H-H2O]+	Fucosterol	0.541324	0.980878	0.918666	395.365	33.728	3.78703		C08817	Lipids and lipid-like molecules	Steroids and steroid derivatives	Stigmastanes and derivatives	47.934	10	10	170895	308545	238617	149677	259086	225348	98594.8	117599	179436	130678	212984	257930	202927	310389	361699	221102	229864	220386	188939	202180	118963	213582	152733	124406	159944	203330	271617	136346	244664	272643	261687	113800	364307
M508T304	[M+Na]+	Fumiquinazoline h	0.267099	1.09132	0.637683	508.204	304.041	2.05184			Organoheterocyclic compounds	Diazanaphthalenes	Benzodiazines	310.467	8	8	6001.94	15298.7	11937.5	16459.4	12234.7	15872	6921.21	19848.8	30785.5	6500.17	11979.3	14095.8	8956.88	8827.59	15640.2	8895.19	16256.3	13311.8	7675.06	5007.39	7022.79	7208.15	9843.68	11179.6	14090.9	10058.1	5807.19	14348.3	8198.05	8338.37	6539.98	15474.9	7764.19
M380T33	[M+H]+	Fumitremorgin c	3.00861	0.887958	0.740104	380.221	32.6	2.36528	HMDB0038642	C20604	Organoheterocyclic compounds	Indoles and derivatives	Pyridoindoles	37.221	10	10	34937.7	66872.5	34068.4	618711	47666.6	738347	721326	447203	64071.3	715204	725469	337997	358795	338150	612250	543470	789725	491476	545102	159603	817485	240296	782903	672846	76318.2	272698	24790.9	774027	557221	484189	842368	303362	508596
M722T252	[M+H]+	Fumonisin b1	0.362613	0.684065	0.0861593	722.403	252.285	1.21698	HMDB0034702	C19241	Organic acids and derivatives	Carboxylic acids and derivatives	Fumonisins	268.268	5	7	2392.21	7678.35	9500	5662.97	11728.4	8563.42	3453.35	8815.86	12525.8	12191	9539.64	4844.89	3191.98	10503.7	4016.52	2887.02	5260.82	5571.35	10346.9	12528.1	4178.95	8977.3	3350.5	3661.82	13503.3	3315.57	8545.79	7520.42	3132.7	5331.93	4277.43	10149.6	2520.05
M539T399	[M+Na]+	Fusidic acid	0.146548	0.966465	0.901791	539.327	399.05	6.05337	HMDB0015570	C06694	Lipids and lipid-like molecules	Steroids and steroid derivatives	Steroid esters	400.775	5	8	5445.23	10495.6	16296	20481.5	21945.8	6640.84	5314.73	5608.21	7251.03	13246.9	7405.36	5087.1	5240.95	12493.7	4165.18	5234.55	6543.42	8571.18	12305.3	17597.2	5845.7	15824.1	5366.15	4245.05	39066.2	1197.32	12179.6	8944.77	5434.38	6664.56	6702.44	13765.9	5226.97
M454T305	[M+H]+	Fuziline	0.383471	1.1678	0.166984	454.275	305.029	7.02804			Lipids and lipid-like molecules	Prenol lipids	Diterpenoids	315.383	8	10	9082.7	17982.5	11945.7	13160.3	18785.6	11815.5	8646.1	13446.8	12231.4	11154.1	9671.37	20655.8	7326.26	10812.6	12531.4	13103.5	11208.2	9764.37	9363.8	19863.4	9615.25	10811.9	10435.8	9924.36	15848.6	12748.5	12258.9	9978.94	9721.14	5395.52	9465.93	12171.7	10967.6
M406T400	[M+Na]+	Galacto-n-biose	0.620857	1.11225	0.696267	406.131	400.498	5.01379		C07278	Organic oxygen compounds	Organooxygen compounds	Carbohydrates and carbohydrate conjugates	402.035	10	7	40289.1	95650.1	67975.3	86586.3	171307	74800.2	21986.7	98334	17971.2	47924	86607.3	31405.6	12524	47765.5	46353.5	83373.8	85521.7	133275	122823	74899.2	87333.4	90953.5	78335.6	26675.5	90149.2	13124.6	53660	174299	30080.3	30663.2	23654.7	34607.4	37790.5
M403T431	[M+H]+	Gamabufotalin	0.169697	1.04292	0.807333	403.253	430.613	2.17259		C16962	Lipids and lipid-like molecules	Steroids and steroid derivatives	Steroid lactones	441.033	10	10	4553.13	6320.13	6700.63	9379.03	7756.78	11484.8	4283.02	7449.84	3413.15	6917.24	14322.3	5980.02	2507.7	7011.57	10408.4	9444.41	7658.98	7253.45	10592.7	5276.84	5706.41	7072.03	7649.8	2578.47	13936.6	3488.58	3754.17	7152.11	3162.4	10736.4	5631.81	13231.5	6181.53
M86T316	[M+H-H2O]+	.gamma.-aminobutyric acid	0.205712	1.06432	0.883506	86.0593	316.118	5.00115	HMDB0000112	C00334	Organic acids and derivatives	Carboxylic acids and derivatives	Amino acids, peptides, and analogues	317.838	8	9	8247.96	10057.2	21636.9	7791.09	10971.8	71497.9	7768.15	7618.54	14313.2	22625	42129.6	9317.15	8590.51	50267.2	8637	9565.69	9457.01	8387.41	5978.47	6015.52	6198.73	7588.86	8229.45	12633.7	42244.1	7305.39	16695.9	10221.8	14315.7	47811.4	5189.15	22664.5	8628.09
M260T163	[M+H-NH3]+	Gamma-l-glutamyl-l-glutamic acid	0.769504	0.652446	0.19028	260.073	162.894	2.81573	HMDB0011737	C05282	Organic acids and derivatives	Carboxylic acids and derivatives	Amino acids, peptides, and analogues	171.287	10	10	32593.4	11375.9	32504.7	31982.4	93266.9	45572.5	8549.61	62123	103775	29622.2	29691.9	24496.7	5061.51	115270	99214.3	18069.2	28293.2	26291.7	17784.9	101269	25150.8	12599.8	40325.4	6934.35	12950.5	6409.21	37523.7	18866.2	11987.8	17664.1	11856.4	54170.8	38558.5
M355T155	[M+H-3H2O]+	.gamma.-muricholic acid	0.431414	1.04139	0.893904	355.245	155.168	2.77946		C17649	Lipids and lipid-like molecules	Steroids and steroid derivatives	Bile acids, alcohols and derivatives	162.657	9	6	67700.2	12459.4	109407	53085.1	51829.7	95020.6	21655.3	81749	244027	35958.5	155131	26359.2	22734.2	135336	77533.7	66138.2	102730	102733	62479.2	200027	60934.3	104103	108502	67686.4	125093	69108.6	189607	55059.3	35251.3	49489.4	52898.8	60520.4	79834.2
M139T111	[M+H-H2O]+	.gamma.-nonalactone	1.75205	1.40138	0.198791	139.111	111.43	3.37068	HMDB0031531	C08501	Organoheterocyclic compounds	Lactones	Gamma butyrolactones	118.003	9	7	49459.7	81906.5	182285	147057	176088	78872.1	27783.8	168500	14005.1	56743.9	72379	59356.7	34984.8	55291	87198.3	70326.8	81141.3	120949	69617.5	58146.2	119349	5611.09	72733.9	64177.3	94267.1	67685.5	63586.3	54778	37737.9	75360.9	78436.6	120844	114909
M639T419	[M+Na]+	Geldanamycin, 17-demethoxy-17-[[2-(dimethylamino)ethyl]amino]-	0.27666	0.893167	0.526806	639.336	418.682	4.87819						423.288	9	9	4371.29	8923.95	4987.33	7045.82	5235.52	4838.52	3127.88	5487.32	12601.3	3832.86	6122.17	3555.59	4330.13	4214.49	4076.87	4251.31	5132.38	5360.3	4620.17	6508.19	4616.92	7185.31	6934.16	2590.05	13179.1	2638.45	4695.05	5581.56	3680.6	3345.51	6056.95	8051.54	4071.01
M323T377	[M+H]+	Gelsemine	0.396779	0.665653	0.0185117	323.196	376.571	0.410972		C09207				391.661	6	6	12683.6	8471.28	5096.34	6798.03	10690.2	5869.11	9591.28	12509.5	10134.1	15815.1	5179.41	9493.86	14902.3	9179.86	18439.4	7459.75	5426.47	4805.44	18922.8	7251.74	9400.45	8302.14	7181.16	4921.95	4234.27	8480.57	9070.73	9539.79	8407.96	8844.8	10977.4	9966.34	5991.28
M411T413	[M+Na]+	Geniposide	0.169995	1.03497	0.883816	411.147	413.462	6.33581		C09781	Lipids and lipid-like molecules	Prenol lipids	Terpene glycosides	416.645	8	9	5641.62	9819.6	19547.3	7274.35	9718.45	14222.3	4698.92	8597.64	21898.3	3792.03	8792.48	6129.68	4126.53	6415.01	9941.97	11102.3	7673.33	3615.98	4548.92	9877.06	8514.77	4825.62	6060.5	8428.18	6419.12	8883.93	8812.97	11460.9	7815.83	6375.13	7393.74	13575.9	9909.59
M519T214	[M+H]+	Genistein 7-o-beta-d-glucoside-6''-o-malonate	0.13299	1.33876	0.316772	519.111	213.668	1.63292			Phenylpropanoids and polyketides	Isoflavonoids	Isoflavonoid O-glycosides	215.917	10	9	2169.05	1218.12	1001.66	4919.42	925.827	5967.21	1588.73	1963.06	1136.95	1613.78	2183.28	1483.37	2919.29	2628.07	1457.6	4038.28	4497.35	3580.74	1759.31	4813.02	2785.75	2205.89	3551.48	2856.47	4340.76	1138.02	1910.02	3954.77	3225.87	3777.41	3295.7	3738.13	3829.09
M527T423	[M+Na]+	Gentianose	1.14766	1.21942	0.497373	527.156	423.201	1.17602		C08239	Organic oxygen compounds	Organooxygen compounds	Carbohydrates and carbohydrate conjugates	432.962	9	7	127839	400865	47629	91144.6	177225	163563	375225	455635	417805	353803	322172	108649	256852	236145	196915	2.69189e+06	274466	171376	219221	73031.9	439521	287628	121177	160235	53791.1	208421	342705	199275	86687.6	107388	115374	136605	307010
M155T67	[M+H]+	Gentisic acid	2.50072	1.38588	0.103461	155.106	67.4625	3.53527	HMDB0000152	C00628	Benzenoids	Benzene and substituted derivatives	Benzoic acids and derivatives	80.21	10	10	329710	97402.9	351975	618282	239367	585733	273670	581997	97515.3	777150	660721	347875	366714	528112	439930	399380	594115	598606	728768	299197	388563	412092	566447	457138	299498	415304	308405	535629	255341	345818	514673	455635	378657
M146T359	[M+H]+	G-guanidinobutyrate	5.31817	1.42262	0.591445	146.091	359.494	5.17229	HMDB0003464	C01035	Organic acids and derivatives	Carboxylic acids and derivatives	Amino acids, peptides, and analogues	373.844	10	10	149581	661431	3.6225e+06	203018	3.03744e+06	157632	577757	165146	210709	416299	144788	261277	65063.6	509272	716982	167577	147368	139255	114196	458890	120208	248461	351122	70219.7	338678	63425.9	779048	147104	75104.7	134156	40181.4	238711	222651
M283T205	[M+H-CH4O3]+	Gibberellic acid	0.301449	1.08098	0.667981	283.149	205.004	7.39758	HMDB0003559	C01699	Lipids and lipid-like molecules	Prenol lipids	Diterpenoids	218.552	10	10	18140.6	15167.1	13732.3	44251.4	16963	55723	28810.2	33176.6	32135	39754.5	25350.9	31087.6	32341.4	35936.3	26340.8	36723.4	44185.4	42163.2	46685.3	21397.8	50200.9	33419.7	28122	59151	18096.2	34499.7	15796.5	51089.1	35003.3	37797.1	44302.8	33334.1	30802.6
M297T177	[M+H-2H2O]+	Gibberellin a4	0.194766	0.822842	0.169182	297.125	176.507	6.26242		C11864	Lipids and lipid-like molecules	Prenol lipids	Diterpenoids	184.306	9	9	3786.65	14321.5	17098	14346.9	25089.9	12959.1	11425.5	10694.6	12319.1	18868.2	10129.1	14773.2	12592.8	14388.3	23022.3	3848.17	17679.9	13078.4	14899.3	20097.5	15725	15510.5	11022.1	11587.7	19677.9	6521.05	4248.38	15768.5	11567.4	15017.9	20855.8	9772.94	11330.7
M347T217	[M+H]+	Ginkgolic acid i	0.37812	1.13707	0.283044	347.269	217.165	4.33234		C10794	Benzenoids	Benzene and substituted derivatives	Benzoic acids and derivatives	218.406	10	10	12943.5	10754.7	21922.3	22472.3	19561.9	13555.3	15706.4	16320.9	9365.9	27319.6	22146.7	18336.2	16653.8	13845.5	22246.5	14578.3	13259.3	15492.7	20491.4	25432.5	23048.8	20366	22346.1	14927.3	18905.4	23615.2	16803.4	11025.7	17580.7	17588.2	17152.6	11661.8	16861.3
M407T298	[M+H-H2O]+	Ginkgolide b	0.741273	1.45511	0.419495	407.115	298.448	1.31014		C07602				316.123	10	9	6294.33	15836.8	17671	155162	19736.4	95986.1	19115.2	59436.8	1732.31	80945.8	43815.5	42159.9	15345.9	36527	16189.9	55339.4	36680.9	70064.9	24053.3	92686.1	53782.4	31985.2	52228	58450.3	54647.8	11353	4901.12	167594	24199.1	26727.4	34546.6	16322.3	35941.6
M305T381	[M+H-C5H11NO2]+	Givinostat	0.213443	0.947015	0.697723	305.133	381.058	0.821067			Benzenoids	Benzene and substituted derivatives	Phenylcarbamic acid esters	384.482	8	8	12280.8	7320.46	23184.5	14804	10017.7	18984.6	14099.6	19195	28264.4	18351.3	17065.9	11949.6	18161	17920.7	22383.8	14961.1	23716.2	17262.7	14345	12927.4	17587.1	14914	20315.7	16613.4	12553.3	13745.3	8950.28	14621.9	20200.2	16333.6	21869.1	12528	14534.5
M420T366	[M+H]+	Glandicoline b	0.234298	0.905881	0.640694	420.173	366.489	0.923146			Organoheterocyclic compounds	Indoles and derivatives	Pyridoindoles	377.398	8	6	5399.31	11393.9	10557.3	13993.2	11274	18828.2	8227.56	18497.1	8780.23	7908.77	12382.3	14188	10133.8	22025.6	12097.7	10050.8	10880	18665.1	13679.6	16568.7	11057	13274.1	12895.6	9482.33	18935.4	11095.8	8746.55	11430.7	7779.08	8773	10992.8	18462.5	5760.6
M550T301	[M+Na]+	Gliquidone	0.524739	1.16768	0.663693	550.192	300.962	2.69153	HMDB0015381		Organoheterocyclic compounds	Isoquinolines and derivatives	1,3-isoquinolinediones	305.386	10	8	4476.88	8164.54	2923.91	46336	9347.41	63523.6	19723.5	43311	5265.44	32593.4	21041.8	30134.3	6911.81	25867.5	15249.1	27632.4	20945.6	56131.5	28463.2	29696	24925.3	20709	17645.9	10323.4	33532.3	6546.6	5943.18	59764.3	8420.84	32451.6	9224.85	25881.2	28325.8
M152T107	[M+2H]2+	Gln-arg	1.64569	0.884913	0.484035	152.069	106.669	4.70719	HMDB0028791		Organic acids and derivatives	Carboxylic acids and derivatives	Amino acids, peptides, and analogues	112.977	10	10	473828	145471	341555	337986	252515	378911	322176	281028	121889	229156	344679	182887	206033	500525	308201	271585	372325	454012	192889	339345	321586	261186	288454	314595	316679	117156	257621	293438	209212	339687	370513	330225	259357
M261T351	[M+H]+	Gln-asn	0.58309	0.989249	0.982598	261.095	351.449	0.79466	HMDB0028792		Organic acids and derivatives	Carboxylic acids and derivatives	Amino acids, peptides, and analogues	354.838	9	7	15772	29673.3	96833	12387.6	65842.7	6735.96	6109.78	7578.55	83893.3	11730.7	11628.6	9706.46	6950.43	7845.42	13814.2	8999.42	12637.4	5764.25	7792.36	32959	10523.5	8788.13	14588.8	6524.76	46072.1	6605.77	36614.2	7337.96	9856.92	7822.65	8566.64	14392.4	7900.38
M275T367	[M+H]+	Gln-gln	0.272861	0.869503	0.477666	275.134	367.104	1.33649			Organic acids and derivatives	Carboxylic acids and derivatives	Amino acids, peptides, and analogues	368.22	5	4	7959.93	8917.01	10285.7	9983.48	10688.3	26417.6	9440.89	9989.58	9149.52	11206.8	9727.87	7584.86	7775.05	17427	10717.5	8991.06	11057.1	18592	9352.19	16599.4	10229.5	11721.3	7680.76	7551.35	45455.6	4180.24	12553.5	27851.4	8172.89	16995.1	10915.9	18488.9	10215.6
M276T346	[M+H]+	Gln-glu	0.298012	0.945925	0.863759	276.134	346.233	0.697029			Organic acids and derivatives	Carboxylic acids and derivatives	Amino acids, peptides, and analogues	363.184	6	8	14730.4	50894.1	7703.73	18263.2	9689.18	39619.3	14757	55247.2	15399.7	6010.41	28732	21151.5	72849.6	27591.3	23400.2	16600.6	9228.56	3717.68	17923.7	11309.9	12569.7	16789.2	15648.4	6356.85	22916	23088.3	66699.9	29382.4	19288.3	7033.75	26767.5	15564.8	12969.5
M416T382	[M+H]+	Gln-Leu-Arg	0.175929	0.902529	0.702	416.259	381.55	1.61353			Organic acids and derivatives	Carboxylic acids and derivatives	Amino acids, peptides, and analogues	389.994	7	9	6148.71	20213.2	39078.8	15848.5	51026.5	19553.8	7417.86	14525	13847.5	15742.5	12477.7	6439.28	6216.03	20909.4	12873.8	5787.37	14008.3	18885.1	13230.1	29885.6	10007.9	26525.7	8113.86	3497.16	44601.8	12246.4	35953.8	23798.7	7616.09	12227	6642.7	25318.5	11616.9
M450T302	[M+H]+	Gln-Phe-Arg	0.212486	0.955566	0.816204	450.232	301.749	2.61882			Organic acids and derivatives	Carboxylic acids and derivatives	Amino acids, peptides, and analogues	305.947	7	5	5340.65	6735.09	7398.43	9479.63	8560.48	15395	10708.3	8559.56	8200.64	6904.16	10628.1	2780.44	6939.53	9214.92	17946.1	3758.93	17378.2	15423.7	4983.78	9441.9	10902	8967.55	4625.97	6458.79	17547.6	7568.22	6172.98	15048	4402.41	8613.76	11816.9	10762.3	10182
M244T366	[M+H]+	Gln-pro	0.396767	0.849776	0.622992	244.129	366.327	2.13533	HMDB0028805		Organic acids and derivatives	Carboxylic acids and derivatives	Amino acids, peptides, and analogues	372.797	10	9	533453	45860.7	66924.1	124008	75071.1	77813.9	21718.5	53911.4	42193.8	42521.6	18532.6	24123.6	21519.7	64125.6	34055.2	33212.4	125305	122241	49150.2	45188.7	38963.6	43114.3	29126.7	20626.7	151821	19195.2	55892.8	83980.5	19514.6	121533	26194.6	151457	39921.1
M407T296	[M+H]+	Glu-Met-Lys	0.364828	1.08135	0.627185	407.188	296.433	0.693696			Organic acids and derivatives	Carboxylic acids and derivatives	Amino acids, peptides, and analogues	299.559	8	8	5660.73	16342.5	22644.6	32088.7	30196.6	40944	25576.1	36917.1	15854.2	26820	21090.1	21241.2	17677.4	36008.6	24319.3	22991	35382	44692.7	26053	37937.2	23415.5	22049.1	37744.9	27247.2	33845	10667.4	16967.7	25306.1	18999.4	15893.9	27059.3	21316.9	20286
M83T387	[M+H-H2O]+	Glutaraldehyde	0.206159	1.00084	0.996525	83.0485	386.77	5.3007	HMDB0029599	C12518	Organic oxygen compounds	Organooxygen compounds	Carbonyl compounds	403.452	10	8	21645.1	49534.1	42348.8	80007.9	38023.6	35060.5	41904.9	39355.2	32270.8	38224	47841.1	76886.5	13696.5	47738.9	23634.8	33934.4	30412.8	38100.3	56647.9	47046.8	41922.8	72376	17249.9	9245.29	43706.4	10721	32697.6	56011.3	13733.1	63017.8	24280.5	66270.7	42337.7
M613T479	[M+H]+	Glutathione, oxidized	0.464146	1.60833	0.186895	613.157	478.525	0.825582	HMDB0003337	C00127	Organic acids and derivatives	Carboxylic acids and derivatives	Amino acids, peptides, and analogues	480.215	10	7	8285.63	3349.66	18626.6	14447.9	3084.04	24788.6	8163.93	9864.2	4115.98	12808.8	3051.13	5025.03	3816.44	4142.64	15169.4	4467.44	4698.91	6845.79	7175.98	2823.89	19703.4	13019.9	15071.1	4477.44	4043.14	3440.12	5468.73	15219.1	6164.87	8911.34	4511.36	4907.36	9310.51
M232T446	[M+H]+	Gly-Arg	0.65906	1.3506	0.270378	232.139	445.825	4.56344			Organic acids and derivatives	Carboxylic acids and derivatives	Amino acids, peptides, and analogues	457.426	10	8	33976.2	47505.8	63124.1	65651.1	20404.9	139412	31368	103020	53517.9	87489.5	60910.2	38818.4	39198.1	104590	22684.5	74088.7	84099.3	132004	90416.1	176054	35165.6	106299	50579.6	38216.4	272457	40796.1	37197.2	109148	46894	69411.8	48363	89597.9	71397.8
M488T205	[M+NH4]+	Glycerol tricaprylate	0.452544	1.51388	0.300192	488.392	205.011	2.37931	HMDB0011187	C13044	Lipids and lipid-like molecules	Glycerolipids	Triradylcglycerols	208.184	10	8	5508.66	52297.7	3795.94	38766.4	2839.14	4982.12	31040.8	34168.8	7659.8	12057.2	17455	10547.5	21619.6	9072.3	9622.15	29892.8	9915.8	11572.4	5468.5	13125.9	101282	14266.8	27957.2	18134	12397.7	24980.9	9947.81	10292.3	52561.9	39219.1	15711.4	7687.68	5624.06
M104T272_2	[M+H-C3H7O5P]+	Glycerophosphocholine	4.96304	1.09286	0.827934	104.106	271.557	4.45458	HMDB0000086	C00670	Lipids and lipid-like molecules	Glycerophospholipids	Glycerophosphocholines	273.539	10	10	469991	1.98493e+06	185243	3.47266e+06	1.5109e+06	4.27827e+06	5.84745e+06	4.25102e+06	325681	4.5626e+06	4.81121e+06	4.76743e+06	1.40787e+06	3.43235e+06	1.01659e+07	5.74843e+06	3.83445e+06	2.77798e+06	2.8622e+06	2.65665e+06	3.49788e+06	1.97077e+06	6.67355e+06	3.06049e+06	1.57949e+06	857484	222931	3.65566e+06	2.14232e+06	2.36761e+06	1.80441e+06	1.64476e+06	6.77057e+06
M480T167	[M+H]+	Glycerophospho-n-oleoylethanolamine	1.54734	1.23462	0.235288	480.306	167.331	2.5225			Lipids and lipid-like molecules	Glycerophospholipids	Glycerophosphoethanolamines	175.583	10	10	139970	211939	359707	118685	253430	359174	143177	211868	71578.9	245564	172521	243031	108110	178004	206745	173360	310359	93149.6	98883.9	134558	275053	254388	165918	133331	112264	77475.4	285073	276583	128932	178337	109623	194972	269076
M454T171_1	[M+H]+	Glycerophospho-n-palmitoylethanolamine	0.730993	1.05897	0.725365	454.291	171.094	3.26347			Lipids and lipid-like molecules	Glycerophospholipids	Glycerophosphoethanolamines	185.191	9	9	134195	130584	278863	110101	219668	286901	132390	155480	91537.6	223184	162013	267954	90579.3	135733	163977	164953	235349	90253.4	77942.7	108905	215910	244356	173403	111130	73102.4	56406.8	228237	208631	118263	144554	67520.5	181010	184369
M787T471	[M+Na]+	Glycine, n,n'-[1,2-ethanediylbis(oxy-2,1-phenylene)]bis[n-[2-[(acetyloxy)methoxy]-2-oxoethyl]-, 1,1'-bis[(acetyloxy)methyl] ester	0.310622	1.48065	0.368747	787.209	470.79	2.7324			Organic acids and derivatives	Carboxylic acids and derivatives	Amino acids, peptides, and analogues	479.441	8	7	4373.5	3127.49	3984.95	21878.2	1801.1	18637.6	9336.88	15217.8	1643.1	7385.25	10489.7	2614.84	966.47	4183.57	6981.36	9343.09	7107.5	14328.4	8162.83	19988.7	15266.6	4123.22	4852.22	4537.27	4697.63	1064.77	897.658	20953.9	3362.07	11665.1	5380.57	4723.95	4305.21
M447T147	[M+H]+	Glycitin	0.048004	0.881669	0.253308	447.126	147.356	2.34599		C16195	Phenylpropanoids and polyketides	Isoflavonoids	Isoflavonoid O-glycosides	159.604	8	6	10002	6466.37	7828.68	5524.97	7574.71	7329.1	7816.26	4582.85	3825.11	4182.53	5939.92	7819.58	5985.45	8868.56	6245.98	13812.1	5612.55	4860.37	5683.43	9392.4	8369.72	6174.08	6372.78	2449.77	21155.6	4534.92	12391.7	6192.13	6198.78	12458.2	6914.8	6725.92	3983.43
M488T311	[M+Na]+	Glycocholate	0.0236384	1.12735	0.485309	488.279	311.229	2.1246	HMDB0000138	C01921	Lipids and lipid-like molecules	Steroids and steroid derivatives	Bile acids, alcohols and derivatives	313.148	8	10	2552.12	6406.44	4081.2	6647.26	3272.09	11862.5	8644.88	4768.7	3892.18	9593.98	7661.65	5749.33	8180.47	4426.44	5831.16	8313.86	9221.83	3193.71	4679.66	6225.12	10987	13668.1	6471.3	16062.7	4090.39	4535.78	5489.68	8663.23	9608.48	7640.59	11265.6	4642.85	3130.14
M412T266	[M+H-3H2O]+	Glycocholic acid	1.01269	1.16605	0.595022	412.288	265.903	5.28362	HMDB0000138	C01921	Lipids and lipid-like molecules	Steroids and steroid derivatives	Bile acids, alcohols and derivatives	267.813	8	8	99617	114155	124429	42685.9	136920	28535.8	19244.4	23134.9	21385.5	35696.4	26159.4	93569.2	44393.2	37578.3	34484.2	30586.4	33686.7	75817.1	49817.2	111336	32575.9	100266	23521.9	30408	341010	84361.4	147791	28348.3	27472.7	64709.6	37158.1	101862	23420.5
M189T342	[M+H]+	Glycyl-l-4-hydroxyproline	0.291222	0.927241	0.678779	189.086	342.286	2.87606			Organic acids and derivatives	Carboxylic acids and derivatives	Amino acids, peptides, and analogues	350.883	8	8	5044.91	17478.5	21188.8	24916	12341.7	32017.6	24330.2	15539.9	26383.7	19370.9	12933	16619.4	29716.6	20197.6	16371.5	17335.4	19495.5	28145	18192.3	13977	20808.9	20047.3	8864.92	30538.2	33924.3	7138.98	17187.1	36943.5	2281.39	23248	36572.6	26789.1	14692.9
M345T378	[M+H]+	Gly-Ile-Arg	0.13742	0.765632	0.354875	345.222	378.431	4.07703			Organic acids and derivatives	Carboxylic acids and derivatives	Amino acids, peptides, and analogues	393.597	7	4	2612.2	17014.8	10791.5	18371.5	65710.5	27488.5	12898.8	22536.4	8189.42	12921.1	32037.1	14905.9	13464.8	32146.7	7030.83	13954.8	22956.8	23931.9	20048.2	60442.4	15038	20979.4	14286	15514.8	43996.8	12093.3	23417.1	21325.3	3305.77	15298.4	17061.8	23250.9	14677.4
M189T287	[M+H]+	Gly-Leu	0.535297	0.938741	0.733153	189.123	286.726	1.4922	HMDB0000759	C02155	Organic acids and derivatives	Carboxylic acids and derivatives	Amino acids, peptides, and analogues	314.604	10	9	21558.8	28367.2	43763.1	44111.8	47815.4	68845.3	27556.9	57242.4	14772.1	43208.6	74117.1	14817.4	13462.9	56973.6	44340.6	28695.5	37853.2	62544.7	35207.8	77222.2	33777.2	48268.8	30494.8	30924.5	121561	15303.1	26255.7	63114.8	19219.9	78754.3	32464	47379	34318.3
M311T219	[M+H-C5H10ON2]+	Gly-pro-arg-pro-amide	0.594863	0.843709	0.512921	311.195	218.586	3.38228			Organic acids and derivatives	Carboxylic acids and derivatives	Amino acids, peptides, and analogues	220.587	7	9	20646	31417.5	43428.1	19623.9	14894.3	14465.4	17889.5	24659.6	66481.3	18391.1	39442.3	41260.7	22453.2	15683.4	26195.9	13722.4	16396.5	16777.2	37392.8	24439.4	19131.3	16310.3	23189	32892.1	55601.9	14981.8	17102.3	15990.7	16374.6	12110.1	28462.2	44376.2	18220.3
M130T425	[M+H]+	Goitrin	0.263552	0.729933	0.525126	130.049	425.198	4.66809		C16817	Organoheterocyclic compounds	Azolidines	Oxazolidines	457.109	7	6	79287.9	11631.8	41889.9	11793.3	102574	16674.6	8811.43	27349.8	30976.2	12055.3	27800.9	16849.1	5178.41	37497	38153.8	7208.81	7615.4	22022.4	19507.6	34826.9	21387.7	9257.97	11158.8	2899.11	57169.7	5592.48	89512.4	45826.4	5086.37	16441.2	5025	32628.1	3428.32
M519T363	[M+H-H2O]+	Gomisin c	0.213474	1.04082	0.872243	519.178	363.115	2.26152		C10881	Phenylpropanoids and polyketides	Tannins	Hydrolyzable tannins	364.753	10	9	5396.82	13022.7	26047.1	10396.6	10175.9	9923.88	8340.24	7971.74	15276.9	16669.4	8498.98	11419.9	5426.6	7332.92	23743.2	5150.41	4641.03	5881.73	4541.6	7954.01	9931.44	4181.67	8067.27	11337.4	7536.9	11808.4	17830.8	7210.64	4877.49	6108.44	12464.8	13193.4	5302.91
M481T446	[M+H]+	Gossypin	0.430895	1.47195	0.292846	481.115	446.249	3.10619		C10051	Phenylpropanoids and polyketides	Flavonoids	Flavonoid glycosides	462.453	10	10	10933.2	1267.33	13153.1	21027.5	2422.11	27122.1	9944.68	12626.9	3122.48	17371.1	6159.79	8877.56	1647.92	3536.68	15455.1	2537.15	6113.08	9311.29	5963.62	4370.1	24805	11335.3	11169.2	8741.52	3052.47	646.719	7770.6	16106.4	5021.92	9953.77	1942.56	8824.87	7988.38
M168T169	[M+H]+	Guanidinoethyl sulfonate	0.605286	1.45625	0.675009	168.031	169.274	4.00351	HMDB0003584	C01959	Organic acids and derivatives	Organic sulfonic acids and derivatives	Organosulfonic acids and derivatives	188.793	8	8	11046.4	3116.19	112501	2305.65	17671.5	405.351	10099.3	490.301	9073.78	5164.95	4409.39	17890.7	369.981	2070.78	21255.1	638.011	823.008	724.733	3473.89	6426.94	991.909	4077.12	4151.02	537.868	399.898	623.972	22109.6	474.772	276.162	813.68	6467.78	23569.9	1093.83
M152T229	[M+H]+	Guanine	0.816816	0.898529	0.694019	152.056	228.542	7.01402	HMDB0000132	C00242	Organoheterocyclic compounds	Imidazopyrimidines	Purines and purine derivatives	249.011	10	10	51255.6	73208.1	74391.6	121692	204549	174626	101321	168085	37903.6	106264	173162	59131.4	49489	121524	330595	112096	175102	162611	94865.9	206336	107228	88053.7	167399	117858	92619.4	51482.6	36695.6	107582	76572.5	69030.3	111102	111545	104532
M183T48	[M+H]+	Harmane	0.461128	1.06222	0.481572	183.091	48.4895	4.06842	HMDB0035196	C09209				60.919	10	10	198744	261010	241363	207290	252639	327093	217089	364639	187200	320145	296432	227663	321888	303587	291521	290217	357208	270142	274866	239535	229582	260375	192398	303541	212834	346057	278376	224112	257076	242491	301325	266407	298312
M570T480	[M+K]+	Harringtonine	0.350607	0.836918	0.554048	570.212	479.513	2.38355		C10597				481.458	9	9	17759.5	3755.32	5857.67	6182.97	5294.46	7232.31	27007.6	18314.9	21859.6	47621.2	11038.6	3061.94	14056.1	3524.26	26050.8	12353.5	17064.6	6707.13	30366.6	4673.5	19125	5388.86	13909.1	12385	5233.64	9804.17	4933.92	9563.3	23514.6	9997.58	25543.7	23633.7	11011.1
M413T234	[M+H-H2O]+	Hecogenin	0.165263	1.02531	0.903825	413.299	234.06	1.75784		C08902	Lipids and lipid-like molecules	Prenol lipids	Triterpenoids	236.662	10	10	209260	343296	232509	208995	296746	127421	203578	180711	116647	165916	193447	250990	345314	267242	194178	299289	237928	268012	228194	318207	243722	579409	221434	214302	296264	264586	348910	202997	408551	268840	335893	303216	268889
M787T491_2	[M+H]+	Heptacarboxylporphyrin i	0.33519	0.608248	0.342125	787.264	491.202	8.0275			Organoheterocyclic compounds	Tetrapyrroles and derivatives	Porphyrins	493.537	4	6	2057.53	2128.91	1765.7	5759.01	1626.9	3431.39	4052.5	2816.78	1901.48	3303.09	14755.7	11791.1	4454.57	25429.7	6557.95	5440.89	8217	11495.5	6150.38	14817.3	6677.44	1051.3	3790.37	2308.05	24893.9	2106.55	4433.12	2393.19	1738.6	7984.24	2540.75	7049.2	3230
M286T101	[M+H]+	Heptadecasphing-4-enine	4.21424	1.23601	0.458512	286.273	101.066	2.32955			Organic nitrogen compounds	Organonitrogen compounds	Amines	108.604	10	10	2.02869e+06	2.12687e+06	919239	886543	1.45662e+06	428392	1.67075e+06	1.5442e+06	949230	1.53127e+06	583738	2.05758e+06	1.09484e+06	262303	430057	1.43214e+06	513089	586262	580062	655248	731376	1.80251e+06	596405	930367	432233	1.5391e+06	602956	522177	1.11298e+06	1.08408e+06	985609	584079	280630
M288T133	[M+H]+	Heptadecasphinganine	4.94079	0.807958	0.541989	288.289	133.222	4.06816			Organic nitrogen compounds	Organonitrogen compounds	Amines	140.645	10	10	1.52088e+06	2.01207e+06	153228	231787	706857	245581	1.15737e+06	1.00285e+06	1.56134e+06	847673	687298	1.66761e+06	2.39785e+06	206944	525138	585719	669374	184229	580235	160886	712921	299405	336512	612645	92903.8	1.22152e+06	329090	197101	1.08082e+06	766249	1.6348e+06	405747	242133
M627T338	[M+H]+	Herbacetin-3,8-diglucopyranoside	0.46206	1.65943	0.39274	627.151	337.574	0.901211			Phenylpropanoids and polyketides	Flavonoids	Flavonoid glycosides	346.76	9	9	2094.8	4614.7	3379.82	84844.9	2191.36	40727.3	9699.89	23497.8	1517.62	43788.3	21040.1	7836.99	1512.99	8671.63	8100.53	17039.5	22970.6	50772.4	59145.7	11753.4	41338.7	25784.2	7660.55	25172.2	10701.2	5482.86	3075.18	82020.4	13632.6	21917.6	7965.6	11577.1	10517.5
M779T217	[M+H]+	Heterophyllin b	0.723849	0.724451	0.505086	779.435	217.195	4.27135			Organic acids and derivatives	Carboxylic acids and derivatives	Amino acids, peptides, and analogues	219.228	5	4	7336.55	24477.9	4853.33	5062.54	8598.37	5094.06	14655.9	5540.12	49876.2	5929.39	5945.85	24055	16126.7	4374.75	5581.2	4671.07	4559.88	5298.7	7780.76	4514.66	6506.6	3528.01	4498.68	3538.91	6348.07	5697.71	5595.17	5019.21	4724.3	5759.41	15610.8	5373.71	3797.21
M251T35_2	[M+H-2H2O]+	Hexadecanedioic acid	0.160572	1.27564	0.303328	251.2	35.257	4.65053	HMDB0000672	C19615	Lipids and lipid-like molecules	Fatty Acyls	Fatty acids and conjugates	40.358	9	9	50063.3	31100.3	39342.9	57524.7	32385.8	120746	31780.4	42192.7	103961	45267	125366	88109.3	29181	23934.3	101636	112422	89732.8	67614.8	57105.1	65164.1	93414.6	80528.9	88582.5	42003.9	64675.7	75160.7	69619.3	60423	54400.9	50132.4	94936.8	45189.4	90440.3
M578T188	[M+H]+	Hexanamide, n-[(1s,2r)-2-hydroxy-1-(hydroxymethyl)heptadecyl]-6-[(7-nitro-2,1,3-benzoxadiazol-4-yl)amino]-	0.648504	0.875555	0.465084	578.415	188.415	2.24585			Lipids and lipid-like molecules	Sphingolipids	Ceramides	195.114	10	10	17164.7	56055.3	22904.6	62924.9	44497.4	59898.3	63444	59278.1	31887.7	90579.8	80659.5	104759	52926.3	50616	63597.8	40969.9	67295.6	60743.9	131223	68604.7	55439.2	94515.2	25036.2	36544.1	69408.2	39335.9	28469.9	62414.5	27109.5	65761.1	54160.1	69946.4	43227.8
M558T184	[M+H-H2O]+	Hexanamide, n-[(1s,2r,3e)-2-hydroxy-1-(hydroxymethyl)-3-heptadecen-1-yl]-6-[(7-nitro-2,1,3-benzoxadiazol-4-yl)amino]-	0.299046	1.03584	0.855652	558.34	183.704	5.09557			Lipids and lipid-like molecules	Sphingolipids	Ceramides	200.803	4	5	8727.69	24551.5	6627.83	9819.69	14796.7	10313.7	11234.6	11668.8	12379.3	12767.4	11129.4	26626.8	17620.5	8789.61	11850.8	12086.2	3933.62	13277.4	13728.7	13113.2	9425.76	17449	12619.9	10976.9	13820.9	12624.4	8105.96	12349.8	10187.1	13208.3	7407.41	10490.4	9952.76
M640T400	[M+H]+	Hexosyl lpe 18:2	0.475638	0.898191	0.465932	640.321	400.344	0.356166			Organic oxygen compounds	Organooxygen compounds	Carbohydrates and carbohydrate conjugates	402.785	10	10	25461.1	21749	12252.9	14721.8	21557	22396.9	15139.5	25123.4	34283.8	29065.2	23418.7	16067.6	24075.7	12056.3	25596.5	19137.3	28230.8	19375.8	17109.6	16444	22996.8	16694.8	13370.3	11426.4	19581.8	12052.3	13023.6	15505.7	14090.8	10479.6	25087.8	20352.7	11102
M392T468	[M+H]+	Hexylglutathione	0.476743	0.858075	0.28269	392.177	468.298	1.12793		C02886	Organic acids and derivatives	Carboxylic acids and derivatives	Amino acids, peptides, and analogues	471.798	5	5	30089.5	35646.1	43647.3	54426.2	37714.7	26753.8	30489	30308.9	56129.3	40575	55191.8	50197.3	25948.2	58205.3	49278.8	29538.7	37361.6	46912.1	39607.2	47082.1	39018.8	32435.7	28488.1	27404.3	47888.9	23532.1	72955.4	37445.8	23521.6	33688.4	22731	50135.5	17020.2
M346T213	[M+H]+	Himbacine	0.154908	1.00518	0.945613	346.273	212.949	3.3048		C10598				214.534	9	10	21180.5	32263.1	23332.9	31202.6	31291.1	30819.5	33216.3	34612.5	25493.8	33580.1	34500.8	46110.8	44938.3	28701.1	29832.3	33390.2	32590	30298	34323.2	37765.8	33646.2	27853.4	28544.6	27357.2	32856.7	27995	26385.6	27444	24558.4	30619.2	45679.7	33164.7	27639.9
M367T206	[M+H]+	Hirsuteine	0.177423	0.991339	0.957001	367.208	206.325	0.40665		C16971				209.532	10	10	141688	108726	141037	192973	168185	265567	109298	155885	104383	121510	115968	128857	295450	109436	205984	160612	111607	131917	132957	159064	245164	144606	227479	188981	189204	127864	124766	170821	111341	141011	393348	161119	146244
M369T208	[M+H]+	Hirsutine	0.340363	1.02692	0.860761	369.223	207.809	2.18616		C16972				219.804	10	10	350028	126016	108427	259872	151540	152282	99370.6	143221	148309	124625	138387	117510	111299	110336	221941	152473	130156	123532	127096	161865	167040	122143	153818	146485	223216	118140	153068	184530	113242	119447	122615	119129	223022
M269T298	[M+H]+	His-Leu	0.997912	0.87791	0.636001	269.159	298.312	2.53598		C05010	Organic acids and derivatives	Carboxylic acids and derivatives	Amino acids, peptides, and analogues	299.692	10	8	21773.5	26492.8	36572.7	87753.1	61535.1	139843	41330	90855.8	16188.5	78508	68903.7	42273.4	16522.2	108877	80093	48003.7	66962	112111	43098.8	208651	67344	62165.7	67796	44080.6	203105	26864.9	20121.6	158753	32826.1	60378.4	48939.5	61368	54310.2
M284T262	[M+H]+	His-Lys	0.373036	0.830115	0.560567	284.098	262.028	4.0797	HMDB0000133	C00387				265.343	10	8	11827.1	6989.71	5359.64	10084.5	17511.1	22446.6	5443.32	16670.2	3356.96	9822.19	17243.8	9189.7	7209.23	34228	41461.1	15319.9	25577.9	30815.3	10529.3	57938.1	6061.41	12419.9	32725.7	9427.65	55711.3	7273.68	5040.1	7855.93	8951.89	15734.7	14559.1	9786.1	8993.19
M235T185	[M+H-H2O]+	His-Pro	1.29123	0.817898	0.455955	235.118	184.816	3.77153			Organic acids and derivatives	Carboxylic acids and derivatives	Amino acids, peptides, and analogues	192.014	9	8	39694.8	17167.2	35361	121116	20147.1	73164.3	87102.2	84851.3	56606.5	98598	124109	93463.5	36538.3	112048	174624	67937.5	111218	78740.3	83032.2	106102	90656	63692.4	102818	75489.2	82672.3	31060.8	49055.8	128403	70367.4	65080.6	121738	79394.3	67764.2
M112T149	[M+H]+	Histamine	2.27576	0.964374	0.892705	112.086	149.174	5.25182	HMDB0060263	C00388	Organic nitrogen compounds	Organonitrogen compounds	Amines	158.266	10	10	142576	67577.2	157370	367235	130496	416639	308711	343493	110819	407937	505660	192881	41086.5	572254	452032	288385	510838	352953	161194	276214	482826	235867	347233	284127	157624	159309	145016	344519	328237	334431	549882	377472	309140
M156T420	[M+H]+	Histidine	0.715154	0.947105	0.88982	156.076	419.999	6.48921	HMDB0000177	C00135	Organic acids and derivatives	Carboxylic acids and derivatives	Amino acids, peptides, and analogues	451.018	10	9	75843.4	382125	64457.2	136415	256953	101604	64798.8	71013.2	38640.4	66377.6	70013	73400.4	49511.6	74284.1	121426	57752.2	78488.2	85937.1	98073.9	70372.7	85909.3	78533.8	35627.4	36788.7	106246	43382.1	30902.9	81448.5	69982	81145.8	64259	122164	27011.2
M319T266	[M+H]+	His-Tyr	0.820144	1.44854	0.138523	319.099	266.152	1.93005	HMDB0014620	C06906	Organoheterocyclic compounds	Benzothiazines	Phenothiazines	268.249	7	7	5800.57	43773.7	40499.8	32939.5	54274.4	33191.5	11301.9	36498.8	5104.9	21358.1	17377.1	14452.8	9665.55	17615.8	13698.4	18933.4	21202.7	36919.1	41112.4	24481.4	17955.9	31090.6	18880.5	16298.1	43209.8	17008.2	31972.9	40301.8	11538.3	17897.2	17529.6	38333.7	18175.9
M447T290	[M+Na]+	Ht-2 toxin	0.130602	1.0475	0.788407	447.219	290.343	2.51838		C19952	Lipids and lipid-like molecules	Prenol lipids	Sesquiterpenoids	301.107	9	8	3951.66	20001.8	14953	28475.4	20982.4	16207.2	7310.54	29037.3	10132.7	15881.6	29970.6	80939.6	20808.5	18608.3	13920.3	31267.1	13017.9	18702.1	15913.3	13031	26921.2	12394.7	10901.7	21222.5	13855.5	8057.17	8467.12	23508.6	17217.8	22919.4	26515	13852.3	9764.41
M405T307	[M+H]+	hydrocortisone 21-acetate	0.23184	0.881758	0.513817	405.212	306.942	1.31218		C02821	Lipids and lipid-like molecules	Steroids and steroid derivatives	Pregnane steroids	312.964	6	4	6749.78	9468.81	7736.68	14765.5	15728.8	15101	4354.43	7705.45	9231.59	7181.76	12295.2	12866.7	8728.97	9405.91	11325.6	5161.41	13477.6	13070.7	13397.3	12874	8235.85	10702.4	10789.2	4697.7	25163.2	2921.58	8354	18374.2	10958.1	2512.13	17614.9	10085.4	7991.93
M344T346	[M+H]+	Hydroxybutorphanol	0.15326	1.20584	0.316746	344.216	346.474	2.65824						365.425	10	10	8586.27	9368.26	19410.7	35683.4	7238.42	21766.8	22345.1	22845.9	26329.7	27740.1	16599.7	16073.8	17093.3	19688.1	14531.6	25408.4	27339.7	23114.2	20866.5	11838.2	30033.3	15874.8	19801.5	31160.5	8838.75	21645.9	19063	18318.6	32966.3	15827.1	18128.1	18124.3	24235.6
M114T393	[M+H-H2O]+	Hydroxyproline	0.674267	0.872252	0.446617	114.065	393.248	2.74862	HMDB0000725	C01157	Organic acids and derivatives	Carboxylic acids and derivatives	Amino acids, peptides, and analogues	397.236	9	8	25919.3	22264.2	41685.9	39745.3	31067.4	68480.9	39069.3	67515.5	36837.4	68737.1	78685	33588.7	82526.5	65765.3	87652.1	57117.2	83021.8	53101.1	57143.9	33942.4	59463.5	43912.9	63391.2	69089.4	23860.3	48969.3	25918.2	44687	71062.8	49863	121168	33057.4	31481.4
M465T397	[M+H]+	Hyperoside	0.195697	1.46381	0.12549	465.122	396.679	7.34411	HMDB0030775	C10073	Phenylpropanoids and polyketides	Flavonoids	Flavonoid glycosides	412.432	6	7	3578.7	3986.7	3028.7	11898.3	3698.37	7631.5	4281.67	5457.57	4388.63	7340.31	3358.54	4625.82	2657	3054.73	3431.63	4408.99	4328.01	7113.91	2382.76	5555.7	5812.16	3271.33	4191.88	5572.48	3055.26	3152.65	3119.4	5609.92	2746.78	5743.97	4034.23	3571.02	2821.49
M137T170	[M+H]+	Hypoxanthine	2.52138	0.973439	0.954565	137.045	169.557	6.77143	HMDB0000157	C00262	Organoheterocyclic compounds	Imidazopyrimidines	Purines and purine derivatives	186.902	10	10	2.01002e+06	581045	698745	583962	2.05807e+06	748863	544978	593424	2.46221e+06	242869	2.32114e+06	423823	449288	1.55363e+06	515863	359062	740287	411311	242095	933150	557175	306865	640448	475151	91721	304813	521240	218871	454697	117365	688885	905133	268554
M367T334	[M+H-H2O]+	Ibutilide	0.546707	1.4883	0.171063	367.258	334.265	0.295907	HMDB0014453	C07753	Benzenoids	Benzene and substituted derivatives	Phenylbutylamines	339.664	10	10	5161.23	41826.4	12622.9	22218.4	17546.1	14887.8	5045.51	7076.29	3311.14	10043	4850.87	20913.7	14393.3	9538.74	2889.87	8994.1	12596.7	18422.5	8887.31	18437.1	7710.47	25507.3	4100.31	7956.98	28630.3	22707.4	28075.7	4667.38	9102.06	14290	18507.4	23300.5	9428.39
M339T346	[M+H]+	Idebenone	0.773498	1.18223	0.567283	339.226	345.645	2.39043			Lipids and lipid-like molecules	Prenol lipids	Quinone and hydroquinone lipids	346.992	7	7	29906.9	67142.4	61280.3	20176.3	57731.5	3610.51	15619.2	17279.4	31690	23363.2	14627.8	36924.6	23346.3	19115.8	5724.93	6837.46	19014.6	14821.5	9589.92	37369.8	8423.33	35097.5	13052.6	6133.67	45557.5	34943.1	69633.9	6744.88	16376.5	15678.7	20406.6	40659.6	12012.5
M203T234	[M+H]+	Ile-Ala	0.560574	0.764561	0.200956	203.138	234.156	1.70963			Organic acids and derivatives	Carboxylic acids and derivatives	Amino acids, peptides, and analogues	236.181	10	9	12066.1	11041.2	36853.3	23015.8	29543.1	39614.5	19447.3	25146.1	15564.7	38581.2	27861.1	9428.84	11444.2	57505.7	37350.3	18548.8	24494.7	43367	18095.4	74133.8	22488.8	26221.1	23598	15117.8	97248.1	16025.3	19617	40335.6	12786.9	24310.1	20712.5	24107.9	14831.8
M402T400	[M+H]+	Ile-Asn-Arg	0.162735	0.853651	0.518604	402.243	399.683	0.134594			Organic acids and derivatives	Carboxylic acids and derivatives	Amino acids, peptides, and analogues	408.272	6	8	22741.4	24163.4	32457.8	20418.2	58434.9	18142.2	6143.25	19988.4	28128.3	21440	21448.6	16454.8	3227.46	29599.9	17868.4	12820.9	15267	23594.9	13369	59150.4	12602.4	26535.8	12457	9648.24	40737	11299.3	25523.6	14675.8	11834.5	14116.5	8631.94	24613.3	12579.5
M261T225	[M+H]+	Ile-Glu	0.390535	1.17696	0.654518	261.144	224.706	2.27579			Organic acids and derivatives	Carboxylic acids and derivatives	Amino acids, peptides, and analogues	231.829	6	8	121189	41638.3	64063.1	143998	56941.5	32710.1	136583	178380	47305.7	122184	30680.2	3981.13	12738.8	26406.5	138617	43416.2	154990	151485	11472.2	41213.6	39355.1	155229	39967.7	156903	30993.9	32910.6	33264.8	191332	10528.5	30692.8	17626	57439	15300.4
M446T253	[M+H]+	Ile-Trp-Lys	0.316461	1.03023	0.806795	446.273	252.594	0.497076			Organic acids and derivatives	Carboxylic acids and derivatives	Amino acids, peptides, and analogues	254.773	9	9	20156.6	36756.3	27583.4	28741.6	36535.3	21890.3	35240.6	26337	21281	27884.9	24537.8	31462	35300	25508.6	29170.9	23377.4	22220.4	34877	23708.8	49539	30337.4	52963.9	48584	30004.8	57958.5	34275.5	28724.8	20041.3	23708.4	25797.6	37064.4	29228.1	34264.2
M359T246	[M+H]+	Ile-Val-Lys	0.420229	1.1198	0.318351	359.268	245.889	1.13929			Organic acids and derivatives	Carboxylic acids and derivatives	Amino acids, peptides, and analogues	248.351	9	10	23224.4	45340	27773.3	19391.2	29867.5	19592.7	23267.7	26213.5	19312.9	32349.3	21257.5	25600.4	35564.3	25977.3	23176.7	22349.9	31010.5	24612.2	22545.4	30243	24081.9	28901.6	22674.4	24695	32012.8	26285.3	39141.6	16787.9	19280	22279.1	29685.2	25469.6	29998.1
M284T152	[M+Na]+	Imazapyr	0.367877	0.585569	0.262833	284.111	151.576	3.79146		C18864	Organic acids and derivatives	Carboxylic acids and derivatives	Amino acids, peptides, and analogues	164.247	6	7	468317	15503.8	60865.5	28741.3	61701.9	48928	35893.2	12576.4	20214.1	33956	43081.5	21401.4	53501.3	18598.7	53619.8	34604.7	45008.1	21728.1	34044.4	28291.3	19107.4	20594.5	26615.6	29122.1	15802	28454.3	23858.7	25362.4	26220.8	23406.4	50376.3	21451.5	20832.3
M312T375	[M+H]+	Imazaquin	0.613144	0.695711	0.22397	312.155	375.043	0.893578		C05076	Organoheterocyclic compounds	Quinolines and derivatives	Quinoline carboxylic acids	377.524	9	9	21397.2	21912.6	27793.9	18364.6	24415.2	23976.6	23058.9	34165.2	34564.5	27703.6	39135.9	27739.1	12566.1	60707	95321.3	27985.7	42836.5	15585.8	19316.8	28865.2	17111.5	45259.2	15459.5	31891.2	14517.2	13101.2	23099.5	20063.3	16193.8	30912.8	16937.8	33832.9	12348.8
M248T136	[M+H-C3H6]+	Imazethapyr	1.46314	0.986054	0.942868	248.113	135.612	3.2994		C18865	Organic acids and derivatives	Carboxylic acids and derivatives	Amino acids, peptides, and analogues	143.187	10	10	407406	449289	270260	762579	442724	667265	684167	622760	29873.8	720524	864778	857724	1.0345e+06	647600	972966	691469	931667	572691	810818	855139	909409	579122	555113	651579	677264	909010	414162	614079	762092	827032	1.29483e+06	585000	557305
M499T244	[M+Na]+	Imidazo[5,1-f][1,2,4]triazin-4(1h)-one, 2-[(3,4-dimethoxyphenyl)methyl]-7-[(1r)-1-[(1r)-1-hydroxyethyl]-4-phenylbutyl]-5-methyl-	0.228515	1.04513	0.813263	499.252	243.926	2.67517			Benzenoids	Benzene and substituted derivatives	Methoxybenzenes	247.071	7	7	9074.28	9704.67	9392.74	14364.9	10553.7	18026	12173.3	21156.4	10855.4	17957.4	23607.7	18726.4	8091.76	19994.6	11114.8	29417.4	16652.1	21143.9	18524.9	27686.1	39694.7	15949.2	22587.7	23466.4	24015.4	3096.49	12934	11846.6	12809.4	16035.9	18950.3	7589.03	14696.9
M69T61	[M+H]+	Imidazole	1.24814	1.31115	0.733708	69.044	61.103	7.37692	HMDB0001525	C01589	Organoheterocyclic compounds	Azoles	Imidazoles	68.342	4	8	221956	31478.5	217549	16984.6	156608	5947.46	40610.4	8565.42	18466.2	13332.5	8938.04	12268.1	5486.08	4255.77	15821.9	9660.67	9246.28	5580.22	6544.95	11987.3	6820.47	8188.68	2921.89	6416.62	6148.52	5237.85	81944.3	1086.3	4516.42	9615.21	9089.98	5083.81	5404.9
M281T253	[M+H]+	Imipramine	0.909828	1.50749	0.157822	281.185	252.964	0.56992	HMDB0001848	C07049	Organoheterocyclic compounds	Benzazepines	Dibenzazepines	258.855	7	5	12409.9	12592	89108.8	33457.3	11524.3	21768	34406.8	27344.3	19079.5	25903.4	25654.5	27770.1	11085	37374.3	30193.3	30481.4	22893.7	31614.4	18542.8	16527.3	27372.4	17948.8	24750	13235.3	70133.6	37062	12787.1	18860	15361.4	28133.7	27079.7	28303.4	22580.7
M593T257	[2M+H]+	Imipramine n-oxide	0.0796957	0.929921	0.644411	593.387	257.023	5.79892			Organoheterocyclic compounds	Benzazepines	Dibenzazepines	258.911	4	8	5555.86	4568.41	8521.76	7018.16	9704.91	6425.71	5369.76	10676.6	5437.13	6805.71	6454.58	4935.92	4892.5	7370.99	3767.41	11526	8213.48	9281.82	4805.75	9615.76	6011.31	7520.77	5786.79	2114.27	8486.7	4789.48	10324.7	5303.23	4142.51	5686.34	5294.01	10603.5	1865.32
M321T65	[M+H-H2O]+	Inabenfide	0.486682	0.675458	0.359316	321.087	64.721	1.50938		C10942	Benzenoids	Benzene and substituted derivatives	Anilides	70.176	6	9	5190.18	11388	4289.21	13572.7	4417.55	14317.8	3577.6	3719	18527.2	3564.26	11005.8	19496.2	4238.3	28847.7	54562.1	16500.7	7226.14	25060.2	28888.6	34345.8	27095.7	4915.17	4489.77	1881.6	48563.8	1242.99	12565.5	4315.28	3005.05	2502.95	4372.55	7161.65	2918.74
M171T365	[M+H-C4H8]+	Indalone	0.313292	0.990043	0.954857	171.087	364.981	1.31413		C19142	Organoheterocyclic compounds	Pyrans	Pyranones and derivatives	397.849	8	8	1609.06	12123.2	14662.3	31176.7	28439.3	38111.7	26570.9	43188.9	15633.4	43004.6	34480.1	31377.3	38578.5	28895.9	27916.8	27579.6	59553.3	34943.8	20291.8	11264.4	31046.9	26782.3	27267.6	36652.8	12400.2	26971.1	4938.62	31759.3	39418.3	28855.6	37625.3	26228.4	37886.2
M160T48	[M+H]+	Indole-3-acetaldehyde	0.13503	0.930927	0.737425	160.075	48.411	4.15704	HMDB0001190	C00637	Organoheterocyclic compounds	Indoles and derivatives	Indoles	50.553	10	10	87215.9	18482.1	75658.6	31461.1	35275.7	16983.1	21228.5	23644.5	39693.6	20469.4	37984.8	24215.8	22273	68248.6	41079.9	18248	27744.4	30024.2	21470.5	23690.1	34320.3	21323.9	21278	34946.2	17097.6	16890.3	60550.5	18530.1	15596.1	30492.3	14590.5	28297.9	46648.2
M175T50	[M+H]+	Indole-3-acetamide	1.01038	1.18179	0.478651	175.086	49.962	0.25452	HMDB0029739	C02693	Organoheterocyclic compounds	Indoles and derivatives	Indoles	63.038	10	10	54037.1	58528	174360	75660.1	146449	141170	73980.1	170258	49537.8	67142.8	64825.4	53724.3	20601.2	128888	58033.1	52798.8	60709.3	125760	164883	39138.9	41397.7	76446.7	30573.4	26607.1	39557.7	30783.6	133510	118806	24975	98527.3	23324.8	113374	49283.2
M247T190	[M+H]+	Indole-3-acetyl-l-alanine	0.0722416	0.712704	0.349	247.107	189.658	3.78539			Organic acids and derivatives	Carboxylic acids and derivatives	Amino acids, peptides, and analogues	196.914	9	8	20200	13776.4	76907.8	21424.9	69990.8	8867.38	26964.9	21912.6	25180.5	22771	20168.1	15359.4	13235.3	23856.2	59737.7	8581.8	10731	18561.2	14609.1	24863.7	12176.1	16016.3	29972.3	11760.2	45918	9058.21	32436.3	14687	12650.4	10589.3	6130.1	28268.2	10819
M130T204	[M+H-H2O]+	Indole-3-carbinol	0.414188	0.889442	0.610541	130.064	204.169	8.32157	HMDB0005785		Organoheterocyclic compounds	Indoles and derivatives	Indoles	209.015	10	9	83331.3	24388.7	52488.6	42754.7	43302.7	81077.7	36035	51246.6	39146	43703.8	82774.5	30656.9	15977.5	49871.9	36697.6	62397.4	29632.4	46066.7	48497.6	53759.2	32695.6	145648	31952.6	21414.4	53942.8	16780.7	38471.4	92900.3	19135.1	52537.4	20985.7	49669.2	34276.1
M204T364	[M+H]+	Indole-3-pyruvic acid	0.0975378	0.887661	0.634349	204.086	364.08	4.99636	HMDB0060484	C00331	Organoheterocyclic compounds	Indoles and derivatives	Indolyl carboxylic acids and derivatives	368.159	4	6	40680.9	87302.9	116078	41127.2	81004	46606.6	19725.3	107631	55263	74945.6	41970.6	32083	24735	58965.9	166931	42101.6	22458	54842.3	325331	57592.7	58072.8	74261.9	52008	43346.9	77610.9	53095.9	79233	63021.9	40836.3	45354.5	44727.8	69337.5	23948
M176T47	[M+H]+	Indoleacetic acid	0.184027	0.668431	0.302044	176.069	46.8255	0.340555	HMDB0000197	C00954	Organoheterocyclic compounds	Indoles and derivatives	Indolyl carboxylic acids and derivatives	48.501	10	10	423650	24156.2	84374.6	24899.9	45300.1	8460.31	29793.3	9839.24	22554	28071	29140.8	32730.9	12848.3	36548.7	102163	12672.2	27996.9	10779.2	12724.3	51952.7	31902.2	29699.3	28583	15323.9	18243.2	9151.63	34407.9	16436.9	14615.5	20985.2	13173.9	13405.3	31481.3
M137T216	[M+H-C5H8O4]+	Inosine	1.0911	1.16825	0.786387	137.045	215.909	3.30912	HMDB0000195	C00294				231.258	10	10	94937	7775.51	10929.3	105333	46093.1	211028	52635.7	98803.8	28003.8	36978.8	382683	75996.4	82316.8	475490	241294	206909	324134	319101	94189.5	777949	62181.7	89254.7	349405	62452.9	520103	101317	13775.2	21394.8	63666.2	142247	210694	116516	25456.8
M321T269	[M+H]+	Iprovalicarb	0.553333	0.97558	0.851821	321.216	268.679	2.19595		C18866	Benzenoids	Benzene and substituted derivatives	Toluenes	270.619	10	10	106485	133056	100868	65115.6	129942	67506.6	59924.4	101732	69646.1	89206.3	96689.9	161320	119836	76271	123137	91801.6	101778	115141	92873.2	80573.5	80832.9	99700.9	94275	99810	94278.7	120615	114601	57730.9	47831.7	67401.4	112846	100946	42696.7
M429T208	[M+H]+	Irbesartan	0.394495	0.930641	0.731934	429.246	208.285	3.61106	HMDB0015163	C07469	Benzenoids	Benzene and substituted derivatives	Biphenyls and derivatives	226.37	6	4	11072.2	44276.2	12639.3	23616.2	20215.1	23528.1	14685.3	19548.8	27942.6	20707.8	12604.9	137451	28078.5	17577.5	10931.7	25295.7	10414.4	18805.7	25467.3	11274.8	27095.8	17157.8	24343	18854.3	18227	18165.8	4756.16	20302	12026	22531.7	13161.7	43674.2	17695.8
M523T403	[M+H]+	Iridin	0.272407	1.26611	0.527351	523.124	402.574	1.12346		C10465	Phenylpropanoids and polyketides	Isoflavonoids	Isoflavonoid O-glycosides	417.17	7	5	16480.6	9848.8	1952.06	27425.9	13623.1	41852.4	1779.39	13459.2	4377.19	15510.8	12511.9	5278.99	4319.88	11139.9	11396.7	10486.8	13481.5	20676.5	9668.87	5814.78	21725	10606.7	4047.6	9321.62	14887.1	3043.01	29796.2	22300.8	8068.98	12928.3	6285.21	13778.8	6939.23
M587T243	[M+H]+	Irinotecan	0.569231	0.746198	0.376257	587.284	243.382	0.980017	HMDB0014900	C16641				264.115	10	10	5804.17	28136	4015.98	20810	4962.3	3085.41	28516.3	19478.6	15018.4	20867.4	16952.4	36450.1	36217.9	4867.17	19672.7	19068.6	19399.5	18831.9	22207.5	18031	60138.8	16580.8	8120.75	9279.6	14897.7	21445	11197.2	6034.68	19903.5	31209	17854.1	9486.91	5866.35
M202T47	[M+H-CH3]+	Isobergaptene	0.788917	0.797506	0.481642	202.049	46.622	4.80727		C18082	Phenylpropanoids and polyketides	Coumarins and derivatives	Furanocoumarins	47.834	10	10	12637.7	2874.88	4801.01	51233.2	8596.27	49643.9	50261.9	56750.4	46979.4	52504.5	29881.9	28256.6	20094.9	22873.8	104057	43133.7	44053.9	106455	32236.1	15395.6	48058.4	27596.6	31727.3	71877.7	6854.41	21119.8	3655.32	38933.9	40736.7	27397.6	28097.8	30292.1	32793
M653T216	[M+H]+	Isohernandezine	0.0903964	0.895397	0.377551	653.323	215.912	3.12667						239.028	8	8	8368.59	7062.7	10384.1	9866.03	11006	10510.3	8516.45	11980.9	11609.1	8717.36	19691	13268.4	6568.98	12775.1	15070.5	5363.38	6705.69	15352.6	4785.21	11666.5	17564.4	8568.13	9784.34	8712.84	8642.62	6043.74	11826.3	8963.02	7535.21	7629.71	8636.45	6644.27	5578.79
M360T391	[M+NH4]+	Isomaltose	4.00234	1.85191	0.270529	360.149	390.999	3.79178	HMDB0002923	C00252	Lipids and lipid-like molecules	Fatty Acyls	Fatty acyl glycosides	396.431	10	8	98764.1	58847.6	65365.7	2.95983e+06	147395	1.43873e+06	320147	1.52432e+06	36782.4	1.51357e+06	233036	762258	57832.1	636038	726048	879531	533333	2.23956e+06	194622	4.41635e+06	921027	90616.4	1.26387e+06	774821	758125	96164.3	85174	1.96737e+06	325200	857111	568529	113039	560057
M336T178	[M+H]+	Isopentenyladenosine	0.144713	0.955156	0.779133	336.17	178.096	0.982642		C16427				188.975	10	10	28026	49875.9	30165.1	51414.4	52213.1	63586.2	38693	73140.4	28879.2	39011.5	43392.8	36045.8	78323.9	40680.7	75037.3	47538.4	54580.4	47934.9	39823.9	46656.4	39159.7	27880.2	45249.5	49663	44585.7	46678.3	69491.9	47183.6	34741.4	51823.3	42485.1	50485	38448.5
M137T97	[M+H-C2H3NO]+	Isoprocarb	0.763505	0.722664	0.593187	137.106	96.966	2.14514	HMDB0031797	C18418	Benzenoids	Benzene and substituted derivatives	Cumenes	100.28	4	6	6.19561e+06	69305.4	344843	114030	498542	45625.3	138450	67692.6	25795.6	111864	60403.2	116010	42093.2	61728.9	483655	44250.9	42477.5	38271.2	51713.6	69460.6	40527.8	54162.5	70615.5	18078.4	23113	40278.2	328920	47599.4	18066.2	39835.3	78124.4	52065.9	45816.6
M179T224	[M+H]+	Isoproturon-didemethyl	0.096509	0.968152	0.827918	179.117	223.641	0.635714			Benzenoids	Benzene and substituted derivatives	N-phenylureas	237.659	7	5	11752.6	6007.63	9393.67	9417.38	7544.93	10813.4	7918.77	9473.27	13352.6	27144.1	26739.3	6911.26	6663.58	10371.2	13583.8	9702.1	10592.1	9240.16	11150	8330.73	9609	8154.32	13055.1	10818.7	6997.64	7359	7974.63	4937.96	8929.06	11224.6	12267.6	1279.49	8802.21
M515T264	[M+H]+	Iso-roridine e	0.274638	1.01509	0.943747	515.28	264.286	2.09091			Lipids and lipid-like molecules	Prenol lipids	Sesquiterpenoids	279.957	6	4	11926	16070.5	32321.7	32661	55419.5	48947	21594.4	50849.8	19051.1	29386.1	24594.3	17939.3	11382.3	23398.5	18404.1	20341.7	23715.6	69221.2	18080.4	63718.9	22675.8	28407.3	17330.5	20105.7	76373	12779	20196	18982.6	16988.1	23822.6	23305.6	35881.4	18603.6
M250T158	[M+H-C2H6O]+	Isoxadifen-ethyl	0.287929	0.991547	0.963773	250.092	158.334	4.02792			Benzenoids	Benzene and substituted derivatives	Diphenylmethanes	168.24	7	7	19977.2	21658.4	31370.5	27612.2	52289.1	20007.1	23364	24429.4	43362.1	43138.9	32560.8	7474.7	27396	22369	38588.1	24240.4	41301.5	34507.3	38851.3	46543.6	23435.5	29702.7	25667.6	35227.8	28360.1	28104.6	26830.8	18168.4	20439.1	21605.7	39244.4	16188.1	24613.2
M697T204	[M+Na]+	Izenamide c	0.162477	0.896187	0.557383	697.387	204.002	1.15533			Organic acids and derivatives	Peptidomimetics	Depsipeptides	207.594	9	5	4564.65	9312.39	5970.18	18316.3	11286.5	5717.88	7868.26	9946.03	5612.58	13793	5296.39	12606.1	7284.48	5953.06	11563.5	8555.99	9791.62	12236.4	9663.62	10580.3	11624.1	19307.8	5379.62	7300.12	9703.22	5274.06	5833.79	12684.8	8054.46	15356.2	9975.3	10470.7	8541.72
M211T34	[M+H]+	Jasmonic acid	0.923122	1.21747	0.567229	211.132	33.727	4.58844	HMDB0032797	C08491	Lipids and lipid-like molecules	Fatty Acyls	Lineolic acids and derivatives	40.358	9	10	9616.92	15281.1	42998.6	91205	28301.1	128810	62411.8	254956	14484.4	122969	200999	92518.8	82674.1	71747.2	186193	204665	183414	92350.7	90972.2	82036.8	154585	144483	181933	137153	46403.2	50840.7	59387.6	114764	178188	176556	73752.5	74267.6	84899.1
M731T498	[M+Na]+	Jasplakinolide	1.20932	2.39664	0.248173	731.22	498.056	1.64475		C16883	Organic acids and derivatives	Peptidomimetics	Hybrid peptides	501.833	8	6	12008.1	10397.9	13440.3	363608	34567.7	69141.8	26729.3	121650	7817.22	46452.3	17627.8	38291.2	4155.55	42078.3	19410.8	68360.4	24603.2	163306	38070.2	149173	54001.7	8041	52971.9	16584.8	68519.9	5375.81	4537.81	182383	10706.8	61379.1	19979.5	10211.6	47137.3
M378T33	[M+H]+	Karakoline	2.06659	1.41794	0.38571	378.277	32.6575	5.84423		C08693	Lipids and lipid-like molecules	Prenol lipids	Diterpenoids	36.322	4	4	144084	218699	514002	52876.9	249122	76277.7	61857.3	57945	68399	74301.6	95006.8	122785	96694.8	78729.4	51399.1	86820	79490.9	45465.1	86415.7	181450	77757.8	160298	83382	58027.7	321783	88737.2	301634	54271.2	77327.4	71787.6	77291	135202	63266
M439T345	[M+H]+	Kotanin	0.285213	1.03311	0.726211	439.119	344.868	5.24833						347.358	8	8	6244.51	23451	16785.8	16741.9	17773.5	15867.5	14539.5	27127.3	28731.8	21786.6	21834.1	16614.4	20770	17977.2	20395.9	16959.5	23756.6	21633.4	17552	23904.4	21724.2	15295.2	18981.1	17878.5	22882.6	22881.8	23933	16394.5	18217.4	17989.2	21350.2	17764.6	17688.5
M314T242	[M+H]+	Kresoxim-methyl	0.492335	0.719693	0.0331501	314.122	241.607	7.21973		C11017				258.808	5	6	9133.72	5181.04	6912.94	8581.72	8657.48	10439.8	6871.41	5641.29	17644.1	9543.06	8348.72	10116	9842.92	5646.11	17032.4	2039.32	10416.3	6405.53	8493.12	8411.05	9353.38	9760.33	8219.26	8752.51	8965.14	10129.4	8377.66	5500.98	6283.1	10702.7	9376.64	11717.8	6191.99
M190T185_1	[M+H]+	Kynurenic acid	0.136081	0.763278	0.427517	190.049	185.029	4.76026	HMDB0000715	C01717	Organoheterocyclic compounds	Quinolines and derivatives	Quinoline carboxylic acids	199.952	10	10	223651	44682.4	84920.5	57013.5	57225.4	21652.6	43167.5	43490.1	47063	33621.6	44604.8	31528.9	14246.6	37379	166296	22328.9	39060.3	19221	19086.9	81801.8	18617.6	17747.3	53901.1	16329.8	59247.9	20360.4	52422.2	22639.6	16261.9	17921.5	10960.5	34994.1	23019.3
M311T314	[M+H-H2O]+	Labetalol	0.486015	0.897908	0.603936	311.159	314.385	5.45887	HMDB0014736	C07063	Benzenoids	Benzene and substituted derivatives	Benzoic acids and derivatives	315.388	10	10	50618.6	78843	62698.3	36474.8	52507.8	105364	98771.4	48546.1	33014	117288	40233.7	175098	57945.8	48864.2	61525.2	88763.1	42599.8	23727.3	106582	21581.5	83324.7	210846	37396.5	203518	18396.1	85659.6	40393.1	36903.9	108112	51157.8	139541	120610	64859.5
M535T92	[M+H-CH6O2]+	Lappaconitine	1.86473	0.686019	0.511285	535.268	91.756	3.07681		C08694	Lipids and lipid-like molecules	Prenol lipids	Diterpenoids	99.755	10	10	301031	36037.2	50972.9	57059	49807.7	62135.6	91949.5	63216.1	528321	56211.7	56845.2	80030.5	60830.9	53820	85125.4	45635.7	53335.5	57120.6	51656.6	45961.7	75688.7	74874.9	36986.5	50819.6	94338.9	73076.6	66776.6	67867	41881.8	65156.1	61221.9	54856.4	53262.2
M189T131	[M+H]+	L-arginine, methyl ester	0.114592	0.911615	0.699524	189.123	130.915	4.21487			Organic acids and derivatives	Carboxylic acids and derivatives	Amino acids, peptides, and analogues	138.045	8	7	42106.5	23346.5	33463.7	6599.44	32670.5	23367.7	22936.2	28345.4	2651.94	23615	41342.2	27814.9	78460.2	29830.8	29596	35595	28902.4	29251.7	16543.4	28249.1	26121.7	21527	16145.3	24271.2	26384.4	30318.3	32101.1	11555.5	22494.2	24703.4	33605.1	27791.5	21651.3
M371T242	[M+Na]+	Larixyl acetate	1.37565	0.755896	0.336949	371.256	242.198	0.581165			Lipids and lipid-like molecules	Prenol lipids	Diterpenoids	245.47	9	10	13612.7	154280	29143.5	146380	92618	52989.8	130862	21387.7	118215	156007	81084.5	232522	198255	15531.3	34214.5	59421.5	37878	9455.35	141079	34739.9	154693	135030	29158	35376.6	30856.3	115811	28499.8	114947	66105.9	149003	236036	143405	25425.7
M400T304_2	[M+H-H2O]+	Latanoprost ethylamide	0.387127	1.12998	0.6754	400.303	304.127	2.41878			Lipids and lipid-like molecules	Fatty Acyls	Eicosanoids	305.655	6	7	8328.7	18203.1	9208.66	2459.1	15401.5	4172.64	5497.36	5186.76	5656.09	5324.86	5579.42	7150.99	3026.41	5961.06	7522.89	4527.2	2345.32	3177.01	2090.66	11543.4	5479.09	5504.26	4816.49	5619.95	8269.81	7951.96	14119	4284.24	4312.33	3023.49	2741.17	5195.74	4066.44
M378T429	[M+H-H2O]+	Latrunculin b	0.640399	0.705659	0.11058	378.15	428.89	2.46337		C19904				450.278	10	10	16010	7189.2	14227.6	6012.03	7622.48	14428.4	14032.9	13654.9	37709.2	16650.3	19594.2	13917	20228.1	12358.6	21703.6	15405.6	10724.8	10864.6	13458.1	14640.1	11498.4	7832.57	14002.8	12564.2	3704.34	13053.1	1982.79	11203.6	14802.3	12506.4	20560.9	9201.16	9208.71
M137T80	[M+H-H2O]+	Lavandulol	1.09831	1.53989	0.130145	137.132	79.725	2.24115	HMDB0036041		Lipids and lipid-like molecules	Prenol lipids	Monoterpenoids	93.052	9	9	22238.5	22363.6	75026.4	56328.3	49571.4	22259.5	17117.2	82056.3	24450.4	21805.3	40798.4	23603.3	27009.8	31762.9	33192.2	53445.7	32364.2	3718.43	19530.2	23088.4	41940.9	43599.8	12878.5	38874.5	30174	29194.6	26570.8	38699.4	17789.7	30799.6	79828.5	14907.6	17041.7
M292T292	[M+H]+	L-bunolol	0.230425	0.86177	0.271536	292.189	292.162	2.36128	HMDB0015341	C07914				295.254	10	8	21339	14586.8	12348.5	8106.98	14496.3	5360.77	10967.4	9769.81	11260.8	15784.8	6989.25	12233.8	9511.5	10246.6	9524.59	12213.8	12113.7	6901.79	3706.79	10723	8560.27	12347.7	8979.99	15237.1	13793.2	12578.6	20414.2	7249.62	16436.6	7635.77	20224.8	11079	5915.01
M162T306	[M+H]+	L-carnitine	1.95698	1.5694	0.129569	162.111	305.88	3.11484	HMDB0062496	C00318	Organic nitrogen compounds	Organonitrogen compounds	Quaternary ammonium salts	307.518	9	8	217458	31247.6	293477	345910	52701.5	293329	132902	199913	18965.4	177282	183632	131074	58125.2	185665	99455.4	178444	276860	158813	109849	197727	143155	75450.4	95011.2	160862	352766	36605.1	265963	296417	88766.3	254408	56628.6	269098	259859
M133T35	[M+H-H2O]+	L-carvone	0.422235	0.969534	0.82374	133.1	34.773	2.01322	HMDB0035089	C01767	Lipids and lipid-like molecules	Prenol lipids	Monoterpenoids	39.168	10	10	78765.4	52777	46697.1	104267	62634.5	98456.9	78342.1	114284	65513.1	84945.5	101699	104708	129621	94216.7	124598	109894	102130	101387	105107	128276	90443.6	97346.9	122102	119463	68483.2	73335.8	70025.7	88055.5	94762.6	78308.6	119785	68385.2	101608
M159T400	[M+H-NH3]+	L-citrulline	2.99164	1.29684	0.479271	159.076	399.553	2.64802	HMDB0000904	C00327	Organic acids and derivatives	Carboxylic acids and derivatives	Amino acids, peptides, and analogues	411.83	10	10	117790	595758	1.05677e+06	256305	714929	262506	40000.2	348568	232263	203599	177918	331688	99231.4	218881	206030	154071	128289	215702	220169	221838	83716.5	299027	110335	35107.5	297936	87740.5	401173	280484	85602.2	107966	66424.1	227018	154173
M214T399_2	[M+2H]2+	L-cysteine-glutathione disulfide	0.43313	0.996465	0.991584	214.058	398.986	2.16941			Organic acids and derivatives	Carboxylic acids and derivatives	Amino acids, peptides, and analogues	417.417	6	7	18504.3	46177.6	58164.5	458.881	41634.8	8342.06	23960.3	25958	15657.7	3687.64	15910.6	15366.8	9765.52	18113.1	12457.3	4498.02	28781.5	3451.96	39134.8	16162.1	18781.3	5904.3	25063.4	19482.1	10610.6	13008.9	18334.2	55275.6	21939.3	6420.05	25623	25792.2	2901.38
M260T353	[M+H]+	Lenalidomide	1.74943	0.934301	0.819596	260.123	353.445	1.86028	HMDB0014623		Organoheterocyclic compounds	Isoindoles and derivatives	Isoindolines	354.835	9	9	32827.8	71224.7	24934.3	357535	63530	340499	109376	370856	501336	343369	113387	200458	334008	168836	160331	194994	432157	350917	370331	46790.3	313106	218202	97845.6	399602	68226.1	272620	129475	325064	358228	304128	165851	245680	207480
M541T211_2	[M+H]+	Leptomycin b	3.08895	0.916703	0.823744	541.337	210.812	2.31642			Lipids and lipid-like molecules	Fatty Acyls	Fatty acids and conjugates	212.771	10	10	67341.7	145226	75835.6	1.23845e+06	117286	639648	1.34124e+06	426476	73271.1	839435	1.33093e+06	624868	271205	381520	428455	324612	760373	368505	1.32036e+06	667903	789195	764278	381997	831412	429953	121351	349877	1.4041e+06	315933	734565	493259	1.15787e+06	771352
M188T184	[M+2H]2+	Leu-Asp-Lys	0.896895	0.654877	0.171602	188.126	184.268	3.44055			Organic acids and derivatives	Carboxylic acids and derivatives	Amino acids, peptides, and analogues	205.588	10	9	25485.3	13426.4	17367.5	51469.5	17512.8	24414.7	26603	44130.7	24742.6	20835.9	50623.5	27818.7	10437.4	26608.4	50086.9	30200.7	19758.9	45651.6	27347.9	54222.8	31618.3	69094.9	26465.2	10774.6	42721.6	10100.8	39457.8	48052.6	13017.8	68495.6	10149.2	87692.5	20810.6
M132T272_2	[M+H]+	Leucine	5.92938	1.32937	0.267496	132.101	272.187	5.25197	HMDB0000687	C00123	Organic acids and derivatives	Carboxylic acids and derivatives	Amino acids, peptides, and analogues	276.326	10	10	1.71178e+06	1.96218e+06	4.6775e+06	2.24941e+06	2.33777e+06	2.96538e+06	643072	3.21325e+06	876800	1.22438e+06	1.58862e+06	783897	537287	1.64861e+06	876237	1.34635e+06	1.37536e+06	2.19516e+06	2.0172e+06	1.65537e+06	829403	2.59574e+06	1.26531e+06	1.0307e+06	2.23655e+06	422958	1.91556e+06	2.70164e+06	698309	1.87804e+06	495184	2.41762e+06	2.17604e+06
M245T186	[M+H]+	Leucylleucine	1.66917	0.774805	0.169687	245.185	185.892	8.28585	HMDB0028933	C11332	Organic acids and derivatives	Carboxylic acids and derivatives	Amino acids, peptides, and analogues	197.866	10	10	90600.8	140228	308300	293970	448226	364648	147563	241747	118873	381461	291288	132229	93741	458848	396320	151550	266666	411979	215103	866207	192172	344717	249677	145964	770184	128485	150610	436083	111504	233750	176729	322307	177683
M260T290	[M+H]+	Leu-Gln	0.958783	0.787555	0.252087	260.159	290.424	1.81637			Organic acids and derivatives	Carboxylic acids and derivatives	Amino acids, peptides, and analogues	306.797	10	9	18758.2	20783.5	46285.2	55136.6	49172.7	85611.9	26523.9	60862.3	30384.7	69337.7	64117.6	28795.6	21015.9	98035.2	55209.3	36718.5	56609.8	87305.7	33659.1	155426	43315.7	50371.6	45247.6	36660.2	208066	31432.1	29290.7	108472	25204.7	55383.5	36472.5	51426.2	36285.4
M261T360	[M+H]+	Leu-Glu	0.298125	1.04111	0.828642	261.144	359.85	2.09859			Organic acids and derivatives	Carboxylic acids and derivatives	Amino acids, peptides, and analogues	365.483	5	7	9039.88	41412.8	54110.3	22995.4	33993.1	24407.4	14400.1	35706.9	37655	25398.3	16267.9	17063.3	22626.5	23303.6	17866.3	15311.1	27663.4	22348.2	11945.4	23957.1	13076.5	19209.2	15487.1	25499	54051	4281.13	30813.8	46856.6	27483.5	17317	15591.8	31023.6	18542
M386T309	[M+Na]+	Leukotriene b4 dimethylamide	0.449296	1.16878	0.649761	386.288	309.017	1.01503	HMDB0005085		Lipids and lipid-like molecules	Fatty Acyls	Fatty amides	313.754	6	7	8557.56	24055.8	10781.9	1401.78	19349.9	3199.17	1868.97	6062.1	5548.35	1806.85	4138.72	9414.11	4459.49	9133.54	5034.44	3822.01	1541	4916.4	2293.09	12541.9	2224.99	7954.63	4549.75	1305.85	10487.1	13257.2	17191.4	3231.06	1646.56	4235.33	1969.47	6143.08	2998.79
M362T108	[M+H-H2O]+	Leukotriene b4 ethanolamide	0.296748	1.18065	0.64229	362.288	107.632	8.83083	HMDB0002304		Organic nitrogen compounds	Organonitrogen compounds	Amines	116.075	8	8	2473.01	3287.31	3545.73	14311.2	10705.3	26444.7	40883.7	49751.2	6488.3	13264	26062.3	2740.19	10563	15008.7	14483.8	15202.3	26203.6	23967.1	15740.6	10935.4	21484.9	7753.09	14648.2	26623.4	3592.79	12198.4	2543.7	19396.5	17121	11692.1	45578	13693	12711.2
M493T251_2	[M+H-H2O]+	Leukotriene d4 methyl ester	2.41321	1.12932	0.676995	493.279	250.702	0.963025			Organic acids and derivatives	Carboxylic acids and derivatives	Amino acids, peptides, and analogues	279.615	10	10	343394	163650	366323	940093	274713	954658	387272	777455	124443	646809	731346	409203	177111	386571	537626	657764	680640	551319	358085	463514	766318	615912	1.80312e+06	1.38011e+06	520802	157019	474000	844217	1.34186e+06	415481	765981	637252	645716
M373T304	[M+H]+	Leu-Leu-Lys	0.258735	0.828356	0.597521	373.279	303.593	2.4032			Organic acids and derivatives	Carboxylic acids and derivatives	Amino acids, peptides, and analogues	305.201	4	7	6825.32	47964.6	66697.9	34298.9	107541	30425.6	9901.11	28464.8	17002.5	23696.4	23117.2	13480.9	8758.43	55099.2	18065.6	11514.7	18254.6	45197.6	31529.8	147517	12288.3	58960.7	11904	9266.49	151185	7718.47	38959.2	32815.3	7191.24	18845.8	12142.6	28593.9	8915.46
M131T274	[M+2H+i]2+	Leu-Lys	0.440086	1.62705	0.10402	131.117	274.212	0.738185			Organic acids and derivatives	Carboxylic acids and derivatives	Amino acids, peptides, and analogues	292.135	8	8	12084.2	26585.5	17402.3	6899.66	16803.4	22478	16221.1	6352.63	6386.12	14745.3	5365.93	57842.7	9264.72	7748.45	2147.05	20715.7	23829.1	7863.12	13812.8	13115.3	24637	10537.5	6863.63	7240.05	8862.04	5703.51	17993.5	7473.61	6203.77	8086.61	9600.27	18330.7	5528.94
M263T189	[M+H]+	Leu-Met	0.552604	0.772311	0.179419	263.141	188.896	3.44968			Organic acids and derivatives	Carboxylic acids and derivatives	Amino acids, peptides, and analogues	195.572	10	10	33156.6	24121.7	41329	53285.8	71590.8	38074.1	20601.4	42612.5	17004.1	52809.1	57563.8	24608.1	14847.9	73613.4	57209.2	25110	30260.7	43644.5	42165.9	112105	30065	48726.7	39722.6	22187.3	91881.8	22952.8	21016.9	57584.3	22096.7	61741.9	33890.1	41441.8	35753.9
M229T244_1	[M+H]+	Leu-Pro	1.18598	0.901557	0.708376	229.154	244.185	5.9443			Organic acids and derivatives	Carboxylic acids and derivatives	Amino acids, peptides, and analogues	247.071	10	10	100872	141017	109544	148717	345958	395720	78146.2	296612	46270.5	111698	102181	58334.5	41951.1	416600	156707	125458	267741	273272	170941	405639	104629	169436	204500	63561.6	950720	40359.3	45933	442717	40150.6	274546	118109	257915	155656
M233T52	[M+H]+	Leu-Thr	0.489405	0.818093	0.200386	233.15	51.6595	3.45964			Organic acids and derivatives	Carboxylic acids and derivatives	Amino acids, peptides, and analogues	65.451	10	10	127349	54788.5	107679	98181.2	147352	74939.4	53518.5	74829.3	72096.1	110202	118282	128019	48361.9	187385	112724	117042	76986.4	204644	107385	130518	58423	219977	66781.6	48159.1	160715	77151.1	155681	177610	48377.6	74851.8	228652	90805.3	76276.4
M231T199	[M+H]+	Leu-Val	1.98368	0.779175	0.231174	231.169	198.808	2.65505			Organic acids and derivatives	Carboxylic acids and derivatives	Amino acids, peptides, and analogues	203.622	10	10	135162	141332	388790	295325	488805	546778	161169	322912	115108	464766	360498	107913	93356.1	570840	455738	205384	299732	518604	205901	939677	224914	401464	266012	148538	1.04058e+06	162898	200328	557207	134169	285757	217308	435114	231440
M284T149	[M+H]+	Levallorphan	0.397059	1.01247	0.895912	284.2	149.495	0.926294		C07069				157.817	10	10	30127.2	34105	34935.4	67417.2	38421	49977.3	44439.3	53698.4	31880.5	55538.5	62638	41423.3	45268.4	60810.3	55618.2	44958.4	59606.5	56632.2	56572.3	57152.3	57060.9	49759.9	46745.3	64024.6	54334.2	52821.8	40121.2	51655.8	40512.7	52419.1	69348.3	54900.4	45931.6
M512T447	[M+H-H2O]+	Lewis a trisaccharide	0.699301	0.828706	0.328019	512.207	447.395	1.19282	HMDB0006582		Lipids and lipid-like molecules	Fatty Acyls	Fatty acyl glycosides	449.223	10	10	10570.9	6626.7	6324.43	33043.3	6198.12	23268.6	27195.9	34617.2	35841.8	34678.2	33407.9	23189.3	28732.7	27332	36754.5	30959	29867.9	31950.5	25019.2	17480.9	32888.8	14958.3	30080.5	25372.9	9571.32	19010.3	5799.22	20930.2	25023.7	22175.1	39551.7	19789.2	20613.7
M714T457	[M+K]+	Lewis b tetrasaccharide	0.162973	1.06662	0.744131	714.24	456.797	2.75342			Organic oxygen compounds	Organooxygen compounds	Carbohydrates and carbohydrate conjugates	459.228	9	10	10209.1	10321.8	15369.4	8461.58	11145.7	8623.77	6374.39	8510.63	16514.1	7236.84	16210	13918.2	10628.1	16991.2	9198.88	11563	8705.91	10559	7068.29	12438.6	10837.2	6736.15	9650.31	7045.1	11835.5	5637.48	18071.1	5849.65	4183.07	10331.9	20954.8	11081.5	11233.9
M276T399	[M+H]+	L-glutarylcarnitine	0.377493	1.23992	0.660481	276.143	399.113	2.53069	HMDB0013130		Lipids and lipid-like molecules	Fatty Acyls	Fatty acid esters	401.33	9	9	21386.8	9840.61	19648.3	7592.44	20953.2	34869.9	11866.9	64628.6	25265.5	20846.5	8428.29	12571.4	2696.51	31514.1	71135.1	8493.07	8987.8	35954.9	6429.39	48457.3	6280.51	10923.5	39138.5	26098.6	20655.7	26753.5	14725.2	26917.2	28662.6	6113.36	41891	7939.96	5883.84
M144T306	[M+H-CH3ON]+	L-homoarginine	1.3275	0.849421	0.257989	144.101	305.879	2.25814	HMDB0000670	C01924	Organic acids and derivatives	Carboxylic acids and derivatives	Amino acids, peptides, and analogues	306.688	10	10	139374	30791.3	117051	156188	70754.7	141617	145630	136982	162464	162442	166164	99892.7	89766.9	166166	180916	88666.6	168300	148846	113572	103969	110519	105397	143705	119471	86145.3	60552.8	97888.8	121669	72738.8	111217	133967	125891	126077
M180T265	[M+H]+	L-homophenylalanine	0.196971	0.945798	0.693351	180.101	264.614	1.02692		C17235	Organic acids and derivatives	Carboxylic acids and derivatives	Amino acids, peptides, and analogues	266.67	9	10	21365.3	14354.1	9892.83	19937.4	9646.43	17598.1	30666.4	12054.1	8956.38	22063.1	21265.3	22365.9	25497.9	22343.5	21859.6	18379.7	20732.1	18922.1	18558	16040.1	35274	18711.1	17738.3	18976.5	12282.6	23839.5	12346.4	16812.5	18464.4	18708.3	24233.2	11815.9	17630.9
M128T261	[M+H-CH5O2N]+	L-hydroxyarginine	0.455351	1.05075	0.858886	128.106	260.714	3.4469	HMDB0004224	C05933	Organic acids and derivatives	Carboxylic acids and derivatives	Amino acids, peptides, and analogues	262.7	10	10	11274.2	96703.9	27317	30026.8	20223.1	28707.4	19424.4	21689.1	53309.3	40303.5	42158.8	197172	16078.4	46632.7	40213	16873.8	31708.6	25014.4	31414.7	31406.5	19424.6	26674.5	16666.3	17314.9	24598.5	10580	21733.1	30418.6	14620.1	34274	26990	33691.7	20403.4
M823T244	[M+H]+	Licoricesaponin h2	0.0634281	0.931904	0.634898	823.427	244.185	2.43346			Lipids and lipid-like molecules	Prenol lipids	Terpene glycosides	258.708	3	9	2829.4	2669.4	3141.7	3158.85	3747.77	4658.54	1920.31	2419.56	3771.19	3088.35	3805.05	2886.89	1627.8	2829.3	2358.72	1971.29	1660.65	3509.93	1924.69	2570.77	2945.49	2810.14	3305.27	1829.46	2182.82	1788.68	3656.27	1611.24	1858.04	2190.86	1626.37	3774.76	1527.43
M424T175	[M+H]+	Linoleoylcarnitine	0.630443	0.858311	0.418442	424.34	175.033	3.57041	HMDB0006469		Lipids and lipid-like molecules	Fatty Acyls	Fatty acid esters	183.313	10	10	3263.43	57474.2	17046.5	49944	33364.2	27692	104213	53026.5	57826.8	87448	58634.5	186056	68447.9	32005.4	78394.8	50421.4	48962.9	43344.4	140756	40929.9	65656.5	80501.9	33551.6	57576.8	45294.5	59841.9	19972.7	42287	47821.7	69917.1	72686.7	45358.6	66684.9
M324T37	[M+H]+	Linoleoyl ethanolamide	5.13715	1.1889	0.624232	324.289	36.631	0.681544	HMDB0012252		Organic nitrogen compounds	Organonitrogen compounds	Amines	60.922	10	10	2.32906e+06	1.43063e+06	5.57833e+06	1.35327e+06	2.34242e+06	1.0533e+06	1.01516e+06	841255	1.30271e+06	1.42713e+06	1.30548e+06	2.18811e+06	1.07756e+06	1.00716e+06	752110	1.05746e+06	1.01195e+06	1.44785e+06	792213	1.27937e+06	1.42538e+06	1.636e+06	1.04249e+06	1.2079e+06	743517	979761	2.88809e+06	954771	883559	1.14641e+06	820323	1.17095e+06	870450
M456T264	[M+Na]+	Lithocholylglycine	0.393272	0.992553	0.973318	456.329	263.977	5.23789	HMDB0000698	C15557	Lipids and lipid-like molecules	Steroids and steroid derivatives	Bile acids, alcohols and derivatives	265.87	9	4	37585.4	43419.1	50541.1	19043.9	53146.8	7982.48	29623.8	17790.6	15548.2	17791.3	15808.9	74009.1	19349.9	24464.5	22861.3	36888.3	21055.1	15864.9	12413.6	44902.1	25262.4	28515.8	18638.4	31701.9	67456.9	19284	57728.6	16369.1	22052.3	20669	17788	43734.6	15151.6
M156T108	[M-H2O+H]+	L-leucine, n-acetyl	1.4813	0.818589	0.315824	156.112	107.615	4.08697	HMDB0011756	C02710	Organic acids and derivatives	Carboxylic acids and derivatives	Amino acids, peptides, and analogues	112.26	10	10	32345.9	16570.5	39513	109268	27634	139790	101722	149468	102280	134584	147722	78022.7	170831	128033	197233	102129	165930	126782	116701	88963.7	155988	62971.9	103294	120975	58911.9	120018	33146.4	99070.4	110873	118040	201179	109397	105703
M150T293	[M+H]+	L-methionine	0.665851	0.97424	0.930294	150.057	293.022	7.05435	HMDB0000696	C00073	Organic acids and derivatives	Carboxylic acids and derivatives	Amino acids, peptides, and analogues	298.941	10	10	29767.5	121992	147594	43634.8	259686	104345	52461.9	106392	40399.7	71380.4	127098	47118.6	22448	126744	124460	26678.6	56431.5	60061.6	115052	119792	54274.1	97590.7	96779.4	38872.8	191356	37591.5	36042.9	189911	38903.3	50814.8	45822.4	129030	78261.6
M197T106	[M+H-NH3]+	L-n5-(1-imino-3-pentenyl)ornithine	0.334364	1.14407	0.299173	197.152	105.971	0.595925			Organic acids and derivatives	Carboxylic acids and derivatives	Amino acids, peptides, and analogues	111.166	5	6	14432.6	14924.9	24007.4	24565.4	18017.1	21834.9	14619.7	22597.9	13367.9	22727.3	19777.9	20336.5	33049.5	18237	17411.9	25508.7	19492.5	21178	45123.3	16903.6	15946.2	20790.5	12443.7	25822.6	17391.2	29211.6	35782.7	14084.2	18892.8	17282.3	30009.2	16333.9	20370.6
M892T505	[M+K]+	Lnfp iii	0.501507	1.33668	0.475884	892.287	505.481	3.46896			Organic oxygen compounds	Organooxygen compounds	Carbohydrates and carbohydrate conjugates	510.512	9	9	17554.4	5780.43	38553.1	11243.4	16178.5	7143.31	4649.57	8850.26	4486.56	5470.32	6584.41	4813.26	1868.94	7769.74	12411.7	23320.9	5629.75	7301.82	3611.91	14484.5	8792.44	3493.4	6257.89	2242.09	9380.33	1402.78	16052.2	9874.23	1939.48	4743.86	2834.59	4868.01	4462.68
M118T303	[M+H]+	L-norvaline	0.960758	0.790453	0.436231	118.085	302.618	7.23374	HMDB0013716	C01826	Organic acids and derivatives	Carboxylic acids and derivatives	Amino acids, peptides, and analogues	310.416	10	8	307745	507133	1.24267e+06	397757	1.17136e+06	598529	123610	586409	863941	336097	286549	253141	111905	596777	357062	267430	342950	583164	473718	680655	261969	545208	264203	112271	766344	154134	1.0022e+06	469011	121604	357230	194717	616461	202687
M730T485	[M+Na]+	Lnt	0.931413	1.14885	0.729986	730.235	484.825	0.842992	HMDB0006566		Organic oxygen compounds	Organooxygen compounds	Carbohydrates and carbohydrate conjugates	494.8	10	10	88499.6	43119.2	152697	41927.4	94630.4	29112.4	18614.6	38744.9	18774.3	26947.9	27571.7	15820.6	4627.24	50559.5	75556.7	29310.3	16062.1	27967.5	16074.6	62171.4	14755.6	14620.4	33773.2	9637.67	36129.2	5250.47	59126.3	23048.4	7399.8	16401.4	10836.7	19235.6	17060.8
M322T314	[M+H-H2O]+	Lobelanidine	2.33997	0.906867	0.740382	322.212	313.93	2.15819		C10156	Organic nitrogen compounds	Organonitrogen compounds	Amines	315.388	10	10	39952.9	23192.5	14849.1	413697	37418.1	536481	510963	608636	193715	596602	612017	424891	638946	418531	697241	509103	769135	441559	585023	128959	462126	208994	527177	990513	99710.5	560156	24426.8	443882	503543	316064	961982	345854	444332
M629T405	[M+H]+	Lopinavir	0.152961	0.810757	0.622841	629.358	405.096	2.70537	HMDB0015539	C12871	Organic acids and derivatives	Carboxylic acids and derivatives	Amino acids, peptides, and analogues	406.575	7	9	2934.94	13480.4	17945.9	6948	23503.6	4817.33	1332.72	4155.52	6169.37	5930.9	4990.85	1416.69	766.13	8614.01	1789.66	1137.09	2982.13	7686.79	7624.51	16449.3	1442.32	10135.5	1348.87	855.838	26547.7	877.716	14920.7	5177.49	881.636	2524.08	1338.77	8669.33	885.379
M427T204	[M+Na]+	Lovatatin	0.605893	1.08606	0.351536	427.264	204.089	0.0985454	HMDB0014372	C07074	Organoheterocyclic compounds	Lactones	Delta valerolactones	208.751	10	10	173231	164996	149121	229548	201029	216321	170825	198746	121198	200581	171132	204477	183604	152920	205532	262187	226692	197690	193688	210511	288824	225545	225245	205314	196620	221101	172699	195070	229384	243017	336760	206568	221965
M400T176	[M+H]+	L-palmitoylcarnitine	1.29247	0.737359	0.277567	400.34	176.202	5.73247	HMDB0000222	C02990	Lipids and lipid-like molecules	Fatty Acyls	Fatty acid esters	184.315	10	10	34325.4	242116	38815.7	168760	75646.8	93593.4	264033	128156	152267	194133	185704	367140	115828	80752.1	239354	126081	108767	92349.1	311397	104727	265574	177709	99804.4	105693	91695.4	129637	51376.6	99983.2	142980	273561	166738	124074	97088.7
M520T195	[M+H]+	Lpc 18:2	6.84716	1.23397	0.452164	520.339	195.396	1.90655			Lipids and lipid-like molecules	Glycerophospholipids	Glycerophosphocholines	211.969	10	10	3.24828e+06	1.96024e+06	4.23281e+06	6.59398e+06	2.32428e+06	5.11282e+06	5.35019e+06	6.67298e+06	753982	6.22753e+06	5.50089e+06	5.85066e+06	2.74736e+06	4.42643e+06	2.60823e+06	5.82917e+06	1.01193e+07	1.1206e+07	5.54441e+06	5.63875e+06	7.73847e+06	4.80592e+06	5.75695e+06	9.22664e+06	7.90109e+06	2.82995e+06	4.68956e+06	6.38251e+06	3.25072e+06	6.62648e+06	3.60679e+06	2.26319e+06	5.33735e+06
M130T309_2	[M+H]+	L-pipecolic acid	0.353499	0.812573	0.367305	130.085	309.031	5.85922	HMDB0000716	C00408	Organic acids and derivatives	Carboxylic acids and derivatives	Amino acids, peptides, and analogues	310.618	10	10	300688	107169	272729	103834	254475	174437	153023	118794	235908	138386	169300	113849	69769.3	196770	310199	114863	106194	114402	102074	221643	87555	113153	165055	61130.6	118005	53673	158337	103606	48671.9	94364.2	89946.5	121091	104060
M130T397	[M+H]+	L-pyroglutamic acid	0.391306	0.889266	0.721995	130.049	397.167	3.92115	HMDB0000267	C01879	Organic acids and derivatives	Carboxylic acids and derivatives	Amino acids, peptides, and analogues	399.032	10	10	222446	88138.8	294665	74135.9	285685	76142.8	32615.4	149187	185438	62371.4	88203.4	45925.8	46599.6	163699	90487.9	30108	90552.4	79103.1	148976	169779	47577.2	48015.5	40086.1	13085.9	241348	36648.6	273639	107641	30366	70335.6	34525	290287	28895.8
M259T405	[M+H-H2O]+	L-saccharopine	0.614752	1.3212	0.484576	259.128	404.763	4.18787	HMDB0062698	C00449	Organic acids and derivatives	Carboxylic acids and derivatives	Amino acids, peptides, and analogues	423.156	5	8	77969.1	21542.9	45406.1	39268.7	29815.8	14928.3	12309.9	14491.9	10251.9	5813.71	16701	15378.4	14668.6	16909.1	16094.9	15142.6	19361.1	17477.4	16024.7	7394.58	17034.3	8460.85	10193.6	12497	22205.6	6118.55	33596.4	19741.9	12546.5	17079.1	17522	19281.8	14576.9
M164T208	[M+H-NH3]+	L-tyrosinamide	0.221803	0.898996	0.417672	164.07	207.767	0.974727			Organic acids and derivatives	Carboxylic acids and derivatives	Amino acids, peptides, and analogues	209.953	6	5	9351.72	8594.09	13978.7	10672.7	11987.2	8747.17	7391.12	13444.8	17206.7	11482.4	8805.94	8692.56	7653.37	8220.57	9431.9	9934.51	9166.5	10888.1	7942.57	7463.43	9223.16	7374.92	18200.8	9900.57	7287.09	9548.36	9049.81	6412.83	7001.63	9417.35	9646.45	8322.31	8475.33
M243T61	[M+H]+	Lumichrome	1.53052	1.23382	0.422615	243.087	61.368	2.81645		C01727	Organoheterocyclic compounds	Pteridines and derivatives	Alloxazines and isoalloxazines	63.087	10	10	686976	216596	537730	691646	447082	1.70079e+06	471048	1.65261e+06	950003	2.59757e+06	991660	1.1886e+06	737193	493197	891059	914175	921978	1.02405e+06	1.25172e+06	983864	451116	1.06621e+06	762954	3.69639e+06	1.45728e+06	1.39783e+06	457968	930446	1.09634e+06	837490	2.88048e+06	824819	2.46608e+06
M465T352	[M+Na]+	Lusitanicoside	0.36098	1.08951	0.69445	465.192	351.998	0.352491		C10474	Organic oxygen compounds	Organooxygen compounds	Carbohydrates and carbohydrate conjugates	354.085	4	8	5279.02	16355.9	14769.2	7629.43	20352.1	6583.79	6519.19	7190.71	8020.9	7542.83	5099.28	6388.16	6561.99	5164.24	5359.4	5330.43	7005.23	8268.01	6552.65	8644.61	5613.06	8103.92	4215.02	4653.1	14486.4	8576.86	20434.5	7393.72	5702.09	6799.75	6972.31	9708.35	5376.04
M304T338	[M+H-C2H4O2]+	L-valine, n-[[1-(5-fluoropentyl)-1h-indazol-3-yl]carbonyl]-, methyl ester	0.420069	0.952648	0.772667	304.164	337.52	1.12765			Organic acids and derivatives	Carboxylic acids and derivatives	Amino acids, peptides, and analogues	346.564	9	10	10271.7	21770.6	16583.2	36236.9	24114	31683.8	30227.8	38260.3	33402.4	59022.5	36936.1	48068.5	45193.2	19545.2	33889.4	39444.7	46522.3	36938.2	48619.6	20961.3	34033.6	39907.5	31936.1	53749.1	21503.8	51228.8	23164.6	35999	25217.2	39359.1	54887.5	43843.7	36499
M468T305	[M+H]+	Lycoctonine	0.181757	1.16057	0.493266	468.305	304.944	1.27249		C08697	Lipids and lipid-like molecules	Prenol lipids	Diterpenoids	312.165	9	7	20134.2	34577.5	46586.5	83074	49010.2	24273.6	37222	40534.1	33190.4	106890	50289.5	70409	12237.5	18672.7	37539.6	39321.7	52797.2	75987.9	41582.1	46643.5	32399.2	45942.8	38684.2	73127.6	37914.4	33357.8	35180.9	28986.9	36681.1	32014.1	77514.1	70136.9	12543.8
M261T283	[M+H]+	Lys-Asn	0.11425	0.743961	0.304202	261.144	283.454	0.0676706			Organic acids and derivatives	Carboxylic acids and derivatives	Amino acids, peptides, and analogues	306.846	9	6	19835.7	18038.6	30845.4	11746.9	20249	12903.7	23969.2	12934.2	13472.6	20965.5	21563.7	20228.5	14777.4	16293.2	44045.9	13436.6	9960.95	12749.1	12086.1	19087.1	12587.2	14659.8	20079.7	14555.5	13492.9	6989.02	22265.6	8340.78	6002.39	11704.4	6338.47	21906.7	12253.7
M275T301	[M+H]+	Lys-Gln	0.197769	0.994394	0.977281	275.159	301.067	0.491911			Organic acids and derivatives	Carboxylic acids and derivatives	Amino acids, peptides, and analogues	317.591	5	6	26164.1	6040.15	23562.5	9400.57	15451.4	10118.1	8608.18	7243.65	7332.89	4393.08	10441.3	13540	6076.3	11041.2	15097.8	9476.94	10555.6	7365.71	9033.15	12520.5	9118.97	4102.37	21462.1	8980.26	7250.57	8740.55	10731.3	7398.79	7923.32	8871.12	9929.54	9682.51	8607.23
M204T175	[M+H]+	Lys-Gly	0.302491	0.837088	0.26973	204.122	175.033	2.44833			Organic acids and derivatives	Carboxylic acids and derivatives	Amino acids, peptides, and analogues	181.632	9	5	17621.4	18341.7	24807.9	29559.1	23063.9	24174.2	9734.75	29458.9	21769.7	13264.9	11477	14430.2	13380.9	37404.8	17509	11699.2	9378.38	22549.6	34589	27322.3	16864.7	16368.8	12777.5	11873.9	14671	7885.64	15111.1	28940.2	10633.1	20843	19537.8	26698.7	12534.8
M388T154	[M+H]+	Lys-Ile-Lys	0.634667	0.818081	0.146458	388.283	153.743	4.34675			Organic acids and derivatives	Carboxylic acids and derivatives	Amino acids, peptides, and analogues	163.036	10	10	13870.2	33862.4	9180.04	20748.1	21691.3	32947.2	30594.2	35905.4	26880.8	32452.4	49904.2	43719.3	50768.2	43634.3	44631.9	27653.5	33300.7	28105.2	35140.5	35412.7	43817	20617.4	27319.1	33216.7	18901.1	38532.3	11983.9	31193.3	30039.6	33747.6	56228.8	25751.2	23745.2
M294T310	[M+H]+	Lys-Phe	1.30138	0.837209	0.301111	294.18	310.411	4.89356			Organic acids and derivatives	Carboxylic acids and derivatives	Amino acids, peptides, and analogues	311.408	10	10	86049.1	105903	58447.2	82179.6	77009	83928.9	106264	100412	154018	109156	125927	182481	210143	73122.9	134946	133118	115965	123625	139375	67953.5	104581	99852.5	106253	167215	65805.8	175733	66604.5	71946.1	117684	68805.8	181248	109871	89379.9
M203T261	[M+2H-NH3]2+	Lys-Phe-Lys	0.792782	0.813338	0.097034	203.138	260.92	1.85145			Organic acids and derivatives	Carboxylic acids and derivatives	Amino acids, peptides, and analogues	263.5	10	10	116838	63620.1	107835	78882.1	113026	109685	43107.3	88662.2	99048.6	86778.5	97871.3	56188	46764.1	128189	108984	50574.3	83912.8	115588	61188.6	206091	70154.5	81030	70350.5	56315.2	163652	50122.1	146685	126193	47552.5	78426.8	60338.7	78580.2	54755.5
M244T480	[M+H]+	Lys-Pro	0.723818	0.940408	0.782502	244.164	480.31	2.04487			Organic acids and derivatives	Carboxylic acids and derivatives	Amino acids, peptides, and analogues	490.887	6	6	76635.2	73251.5	75253.2	144962	202363	109233	84130.4	164560	37763.6	76221.4	90378.9	56981.1	29909.9	207691	90247.7	146276	113271	132699	87123.8	377874	83732.8	99712.7	132424	42708.7	251692	40902.4	41686.4	176864	45465.2	125848	65636.5	77719.5	110819
M248T427	[M+H]+	Lys-Thr	0.301017	0.914136	0.685235	248.16	427.389	2.68511			Organic acids and derivatives	Carboxylic acids and derivatives	Amino acids, peptides, and analogues	442.817	9	7	7546.67	12196.5	15371	15855.6	19980.1	25697.3	3821.33	22668.6	3114.4	16835.9	26974.7	8491.88	7702.97	31635.2	11156.8	8829.84	12447.5	19111.8	18670.4	70740.2	8678.65	14956.7	20305.5	7864.1	91947.1	7548.55	10340.6	28176.6	4463.98	28401.5	10434	19198	9654.86
M231T378	[M+2H]2+	Lys-Trp-Lys	0.964406	1.02839	0.926673	231.169	377.664	3.64685			Organic acids and derivatives	Carboxylic acids and derivatives	Amino acids, peptides, and analogues	390.832	10	10	2.86916e+06	93489.2	430253	101901	163269	138216	60460.4	123173	118578	109569	104558	94894.1	80592.3	100358	259564	66729.4	86254.8	72359.7	78613.2	106926	72448.3	98718.7	135781	55286	109450	44333.3	1.29468e+06	84609.5	75176.6	92063.9	147069	134382	124215
M246T402	[M+H]+	Lys-Val	0.667253	1.33737	0.259926	246.18	401.506	1.15907			Organic acids and derivatives	Carboxylic acids and derivatives	Amino acids, peptides, and analogues	413.494	6	9	51587.1	23899.3	55311.8	75676.9	49404.2	89888.3	18944.8	32729.2	31097.4	33376.3	27861.4	16871.9	14684.1	43122.5	22360.8	20912	24360.5	79959.4	24137.5	56677.3	20684.7	34112.2	14060.5	13300	66645.9	16206.6	28023.1	35247.6	14632.8	28219.8	20392.3	31131.8	19621.2
M105T190	[M+H]+	Malonic acid	0.647715	0.646905	0.601296	105.033	190.417	8.4243	HMDB0000691	C00383	Organic acids and derivatives	Carboxylic acids and derivatives	Dicarboxylic acids and derivatives	196.762	10	10	1425.72	6395.91	100161	16439.3	76901.8	4638.84	98660.9	6258.46	1728.3	115302	29235.1	39500.9	1546.11	99769	563885	30851.7	7528.14	4101.97	6757.46	174489	14079.2	39970.4	230667	5449.35	9350.59	4511.39	1576.14	19593.3	4201.74	5203.04	978.722	14672.4	37530.2
M248T389	[M+H]+	Malonyl-l-carnitine	0.293206	0.903012	0.752551	248.112	389.214	0.290716	HMDB0062592		Lipids and lipid-like molecules	Fatty Acyls	Fatty acid esters	390.843	10	8	52181.7	10427.6	32321.8	32774.6	12985.6	17417.8	20380.6	13844.3	28662.5	35232.5	16817	23610.3	8349.56	15177.3	78770.5	25534.8	23478	16022.8	34315.8	29712.9	25884.1	16006.4	26889.8	13179.1	14488.1	12618.9	88246.2	17155.4	20184.3	25134.3	36038.1	32896.1	12394
M829T507	[M+H]+	Maltopentaose	0.333643	1.36472	0.528439	829.284	506.894	2.58622			Organic oxygen compounds	Organooxygen compounds	Carbohydrates and carbohydrate conjugates	513.661	8	6	1330.1	2168.02	2312.87	33963.1	3132.01	9632.12	3859.38	16336.8	2552.33	5050.27	3807.72	7611.89	1325.9	19388.4	6645.29	13967.5	5049.5	15457.5	4617.51	28455.5	7083.45	2047.27	4919.7	5464.31	9830.43	1880.79	2267.95	49119.3	4576.42	6028.1	3363.25	3006.32	6153.06
M933T498	[M+Na]+	Man3 a	0.487336	1.08314	0.835356	933.314	497.863	0.523616			Organic oxygen compounds	Organooxygen compounds	Carbohydrates and carbohydrate conjugates	501.26	10	9	50070.8	16537.6	46060.7	14768.5	36235.5	9535.95	6810.81	13358.5	5463.63	11549.3	9132.29	6003.03	2932.82	9053.46	23946.8	7889.34	5887.62	9805.45	11471.3	16140.6	5901.64	6444.79	11885.2	4463.71	7062.05	2061.3	16087.7	8978.77	3617.52	5447.5	4545.78	8885.34	6082.9
M411T304	[M+H]+	Mangostine	0.503291	1.23563	0.558134	411.161	303.986	2.59093	HMDB0035796	C10080	Organoheterocyclic compounds	Benzopyrans	1-benzopyrans	324.891	9	6	4388.44	6258.79	39363.6	24129.1	35708.4	6208.88	10870.9	17109	4955.01	6871.5	13254.5	8966.29	13070.1	17248.5	17265.4	67043.7	4875.82	8109.14	6105.82	16735.1	5639.98	5454.57	18960.6	12390.5	8367.8	9703.22	8853.74	33513.7	13100.9	8513.85	15975	12808.6	14411.3
M417T203	[M+H]+	Manoalide	0.404277	0.954574	0.764456	417.271	202.558	1.13806		C17156	Lipids and lipid-like molecules	Prenol lipids	Terpene lactones	216.632	7	7	26779.2	72490.3	38416.4	25781.1	56802.1	36410.3	30247.2	32663.4	30968.4	40342.4	43080.4	53400.3	86577.3	35452.4	63490	44647.7	55877.4	32185.8	32861.6	51361.3	38554.7	46833.4	30743.8	38740	41595.3	46089.1	43505.2	36661.7	36108.9	41306.3	44588.3	48386.4	46813.8
M241T345	[M+H-C4H10O]+	Mecoprop-m-butoxyethyl ester	1.71845	0.980957	0.954587	241.081	344.83	4.99743			Benzenoids	Benzene and substituted derivatives	2-phenoxypropionic acid esters	347.532	10	9	11595.9	65623.4	37010.8	179487	10129.1	427984	239824	157009	119513	286977	193126	188228	109721	107299	225384	266483	418359	316072	95813	117436	272845	162973	263938	375287	131645	80764.7	15403.9	307821	374784	87214.8	423740	263507	213285
M439T251	[M+H-CH4O3]+	Medicagenic acid	0.530827	1.26958	0.272575	439.312	251.062	1.48368			Lipids and lipid-like molecules	Prenol lipids	Triterpenoids	256.41	9	10	15579	38483.9	31870.1	20865.4	26876.2	17502.8	26912.7	44159	16854.2	21327.7	22586.2	28396.3	30977.8	49674.1	24768	25681	23435.6	21573.3	23458.8	29680	23638.8	28483.3	20413.5	24763.1	36965.9	55410.1	32822.1	18793.6	20030.4	22685.8	23226.2	52489.8	26545.7
M465T34_2	[2M+H]+	Melatonin	1.12413	0.890177	0.61568	465.272	33.776	3.24195	HMDB0001389	C01598	Organoheterocyclic compounds	Indoles and derivatives	Indoles	52.432	8	9	75798.4	90864.1	41598.9	50602.9	31689.7	61551.5	90915.9	78045.5	199068	127804	67889.3	82273	38262.6	90503.6	47664.7	55568.4	69863	84472.4	36186.5	33537.5	81270	63571.1	65509.1	58169.6	50993.1	59750.7	37071.1	59397.4	40634.1	48564	75568.5	67851.1	59331.5
M543T453	[M+K]+	Melezitose	0.963064	0.853967	0.633068	543.13	452.933	0.0177104	HMDB0011730	C08243	Organic oxygen compounds	Organooxygen compounds	Carbohydrates and carbohydrate conjugates	469.79	10	9	113425	15386.9	36492.8	100677	47528	81976.3	85401.5	96409.8	12738.8	34538.6	81657.8	114604	12951.3	171430	93904.5	184266	40216.8	84827	16004.2	172380	80048.4	7082.01	94714.7	41802	216446	9587.41	23354.8	89090.3	29012.8	93017	39456.9	14857.6	65673.5
M365T435	[M+Na]+	Melibiose	0.501431	1.29616	0.536994	365.104	435.205	0.0642579	HMDB0000048	C05402	Organic oxygen compounds	Organooxygen compounds	Carbohydrates and carbohydrate conjugates	444.019	8	7	70733.9	62913.6	29465.1	219611	9056.78	49568.2	32537.3	51673.5	19144.5	245918	48368.5	66705	18572.4	58267.3	40387.2	224840	70985.9	98508.8	27111.8	27649.3	86247.5	37122.3	225589	59090.7	71494.4	24696	28056.8	58124.8	54260.9	22278.2	30369.4	22303.3	42959.9
M248T335	[M+H]+	Meperidine	0.342789	0.945607	0.729585	248.164	335.156	2.02927	HMDB0014597	C07128	Organoheterocyclic compounds	Piperidines	Phenylpiperidines	339.862	10	8	10676.4	24156.7	6808.6	30717.6	16654.4	22641.2	21902.1	25385.5	23220.8	35495.4	32192.1	36443	25669.6	25910	30049.8	30331.7	36084.2	33317.6	34746.1	30543.7	31893.4	32097.9	28985.8	31612	22704.5	23005.7	13951.8	23931.5	29770.3	33087.5	37894.3	26393.3	27275
M131T353	[M+H]+	Mesaconic acid	0.114853	1.06618	0.85381	131.044	353.353	3.58649	HMDB0000749	C01732	Lipids and lipid-like molecules	Fatty Acyls	Fatty acids and conjugates	354.993	10	10	2441.27	9546.24	4369.94	6867.85	5468.78	13046.9	3141.12	13604.9	21951.5	10799.2	6004.69	6791.99	2801.43	18627.6	4681.26	3443.32	6799.57	9426.65	14654.3	13603.1	5810.56	9195.5	2991.06	3587.76	8223.4	3784	15902.8	10800.9	7616.05	10517.5	3343.4	15690.5	4480.93
M507T402	[M+H]+	Metaflumizone	0.480545	1.0364	0.917712	507.13	402.037	1.23773		C18523				403.565	10	10	109896	110005	67143.9	181254	126085	23647.1	55656.5	98024.9	7843.45	162016	20785	22882.8	7024.47	77891	47958.2	11434.8	23996.1	122524	92832.6	77326.2	111008	91007.3	26075.2	28589.2	120635	26592.5	318762	94803.8	16219.7	36885	18593.2	136211	33500
M222T337	[M+H]+	Methabenzthiazuron	0.144124	0.920116	0.469706	222.076	336.945	0.000545246		C10909				339.336	5	5	4748.6	5231.01	9130.25	4779.47	7190.02	5437.36	5383.67	4018.68	8927.52	5809.73	5898.26	8135.63	6329.43	5246.86	8259.19	4213.79	6003.99	6234.68	7877.49	4530.12	4663.79	6753.18	6382.89	7651.69	5100.99	7634.97	21937	5433.06	6365.11	4649.68	5164.92	4450.92	6506.52
M354T178	[M+H-H2O]+	Methanone, [1-(4-hydroxypentyl)-1h-indol-3-yl](4-methyl-1-naphthalenyl)-	0.135707	1.26971	0.293453	354.162	178.303	2.85612			Organoheterocyclic compounds	Indoles and derivatives	Naphthoylindoles	189.242	7	7	6954.38	11827.6	18013	20394.6	11123.9	9760.59	20452.6	21632.4	13107.4	7842.59	9921.4	18198.4	10010.3	18177.6	5270.29	20360.8	24668.7	14676.6	12347.1	24386.6	12585	9879.33	9623.04	16215.1	19686.1	7320.63	19083.5	18178.3	7162.66	6437.23	36557.1	12151	7643.88
M350T227	[M+H]+	Methanone, (1-pentyl-1h-indol-3-yl)tricyclo[3.3.1.13,7]dec-1-yl-	0.832689	1.24118	0.378067	350.267	227.14	4.93287			Organoheterocyclic compounds	Indoles and derivatives	N-alkylindoles	232.638	10	10	43939	68038.6	61822.4	20001.3	65209.5	18305.5	19378.9	19583.5	31762.1	21752.6	27953.6	30606.8	25995.6	15491.1	28568.1	23643.6	23640.4	20410.7	10671.4	61055.9	30075.5	41747.1	17793.2	23271.8	70457.8	40443.7	61157.2	19110	14340.8	19106	22824.9	28528.9	14807.3
M166T385	[M+H]+	Methionine sulfoxide	0.7169	1.28956	0.449702	166.052	384.729	3.22089		C02989	Organic acids and derivatives	Carboxylic acids and derivatives	Amino acids, peptides, and analogues	403.125	7	7	32650.3	46930.6	97253.8	67819.5	70400.8	121296	37206.7	123769	27554.9	53383.5	119765	35940.1	20598	122061	45428.6	24346.8	82131.3	32032.3	91484.6	34105.1	34965.9	95406.6	56564.9	23938.9	181435	22531.4	55126.3	96676.7	27222	41160.6	28756.6	81433.5	63567.2
M340T379	[M+H]+	Methylergonovine	0.706412	0.717529	0.050625	340.186	379.181	8.52279	HMDB0000745	C00884	Alkaloids and derivatives	Ergoline and derivatives	Lysergic acids and derivatives	397.901	8	9	50441.9	36494.6	21612.9	17972.5	31444.7	15121.1	40156.3	22996	35526.6	24633.3	20166	40037.5	31772.8	15130.5	51044.4	12503	20665.3	15276.7	23982.3	18882.3	19534.9	18498.7	16794.8	16071	11835.2	21386.8	26854.3	8241.47	18662.9	17033.7	56730.6	34109.7	7161.05
M74T261	[M+H]+	Methylguanidine	0.323452	0.718217	0.275593	74.071	261.294	9.95267	HMDB0001522	C02294	Organic nitrogen compounds	Organonitrogen compounds	Guanidines	267.083	9	10	16024.8	3997.11	39677.7	19498.1	21832.3	20637.8	36753.5	25052	28050.8	19883.7	22562	17519.4	7430.09	31808.2	68620.2	20714.2	9300.74	21877.2	12534.9	46210	13746.5	292390	40181.6	17587.1	10438.1	6364.93	7437.31	17891.4	13700.9	12840.9	12395.8	15152.7	11225.9
M225T151	[M+H]+	Methyl jasmonate	0.447447	0.854986	0.272684	225.142	150.61	4.0609	HMDB0036583	C11512	Lipids and lipid-like molecules	Fatty Acyls	Lineolic acids and derivatives	157.817	6	4	23205.5	13647	20012.8	22725.8	18866.4	27487.8	20270.9	32759	11808.3	28789	26799.8	6181.52	25976.3	22443.7	37567.3	32136.6	31618.6	18568.5	27148.2	27207.2	43429.5	20388.6	24310.6	16845.6	20527.1	22432.9	16266.1	28638.2	14079.6	24840.4	36044.8	24204.9	22528.4
M683T186	[M+H]+	Methyllycaconitine	0.208737	0.771182	0.109752	683.372	186.176	0.691309		C08699	Lipids and lipid-like molecules	Prenol lipids	Diterpenoids	192.632	5	7	11016	13154.6	14163.3	13910	27140.9	11662.1	13096.1	8988.83	9613.03	9551.89	12587.7	14872.7	12625.8	18463.3	8554.27	10277.2	11382.5	14154.2	15731.9	22256	7030.45	19299.4	14751.8	10436.2	14937.5	11157.4	5432.37	6546.32	12522.2	10947.6	22706.4	15480.7	4591.35
M196T48_2	[M+H]+	Methyltyrosinate	0.410004	0.9207	0.425273	196.096	48.326	2.24138	HMDB0029217	C03404	Organic acids and derivatives	Carboxylic acids and derivatives	Amino acids, peptides, and analogues	59.227	10	10	33569.4	44168.8	28603.1	33686.6	32962.7	34515.4	34349.8	40084.1	41455.9	30095.3	51490.4	30749.2	20581.4	40920.8	37381.5	33556.1	47414.9	36149.4	45531.2	43509.1	34411.7	60272.7	24617.9	24945.7	61817.1	31692.9	29828.8	34221.5	26500.6	54438.2	22902.3	50822.2	23075.6
M437T37	[M+H]+	Met-Met-Arg	0.290218	0.998475	0.988506	437.192	36.674	2.96667			Organic acids and derivatives	Carboxylic acids and derivatives	Amino acids, peptides, and analogues	38.061	10	9	103850	135228	113573	110269	181585	145287	120365	134522	155997	118061	123581	59319.4	142440	176122	83262.4	86744.2	139605	103388	105442	194845	93899.7	135882	126307	172601	172245	155417	202203	94254.9	90748.8	63099.2	112588	134753	148688
M280T281	[M+H]+	Metolachlor cga 357704	0.553956	0.810851	0.227547	280.128	280.751	2.22802			Organic acids and derivatives	Carboxylic acids and derivatives	Amino acids, peptides, and analogues	282.382	8	10	8974.23	14241	5987.67	15383.9	16213.5	14484.6	17648.3	21049	30313.6	18536.1	11518.6	24140	12876.7	13927.2	9639.94	15254	15840	14680.3	17092.1	17778.8	11045.9	13111.6	16351.5	9812.13	18619.8	6796.82	7733.54	14098.2	9460.78	14852.2	16979.4	18792.4	5262.56
M375T134	[M+H]+	Met-Pro-Lys	0.434344	1.28447	0.264391	375.208	134.228	2.96261			Organic acids and derivatives	Carboxylic acids and derivatives	Amino acids, peptides, and analogues	142.317	6	8	38354.5	39775.6	35851.2	59686.7	23338.8	62056.9	55791	74618.5	35786.4	58789.2	65330.8	60620.2	56709	55424.1	63591.1	51235.1	146079	60295.2	42594.3	32204.1	72223.9	68983.6	60599.2	50091.8	44464.5	35561.9	49102.8	55838.4	22223.6	42352.5	67191.9	53537	57467.2
M405T218	[M+H]+	Met-Val-Arg	0.205281	0.976871	0.84463	405.21	217.839	5.93535			Organic acids and derivatives	Carboxylic acids and derivatives	Amino acids, peptides, and analogues	219.804	9	9	26681.7	17754.1	20894.5	25754.4	20634.3	30599.6	20429.6	17911.6	12592.7	17700.3	20257	27614.4	18058.6	25519	21080.8	15340.7	18025.2	14855.4	13617.9	30801	18669.5	13504.2	7268.26	20208.7	23682.6	19992.8	31985	20198.4	12285.6	31727.5	21227.6	33060.8	28385.5
M227T259	[M+H]+	Metyrapone	0.379354	1.02836	0.948969	227.113	258.567	8.0527	HMDB0015146	C07205	Organic oxygen compounds	Organooxygen compounds	Carbonyl compounds	261.435	10	8	93477.5	16425.5	44122.2	19509.4	38797.5	27650	17668.5	29467.7	11231	22311.7	24001.1	13243.9	16283.5	17267.5	28040.7	19629.3	27325	25050.3	19984.8	13801.6	21818.6	9997.83	21960.3	23640.7	7321.05	11827.9	60318.3	20120.5	19866.6	18590.9	28341.1	15473.3	17427.7
M413T397	[M+Na]+	Mevastatin	0.545109	0.797621	0.416576	413.238	396.983	1.92415		C13963	Organoheterocyclic compounds	Lactones	Delta valerolactones	399.006	10	10	37282	29693.8	19474	20640.3	42450.7	5815.52	15313.3	16338.4	45929.9	21782	16609.1	40607.3	20087.7	22551.2	20492.3	10793.9	8063.4	7894	18104.2	14015.1	10113.3	12484.5	8010.21	8549.53	10967.3	19801.5	24942.2	4715.09	12121.5	9297.13	23597	16784.2	8194.96
M202T105	[M+Na]+	Mexiletine	0.926822	0.852421	0.444341	202.106	104.759	0.423475	HMDB0014523	C07220				113.828	10	9	34823.4	28374.3	27131.8	66347	13280	60944.2	68758.8	52325.5	106567	18128	46684.5	23369.4	62225.6	41041.9	67677.4	43115.5	55221.4	93445.6	47558	39372.1	46317.4	29089.2	26456.8	75195	56230.2	51399.2	29790.1	44980.7	34395.1	42327.1	52034.6	88040.2	29594.3
M184T379	[M+H]+	M-fluoro-dl-phenylalanine	0.376076	1.15193	0.311386	184.06	378.733	1.48262			Organic acids and derivatives	Carboxylic acids and derivatives	Amino acids, peptides, and analogues	385.922	9	6	25967.5	31332.2	27477.6	18452.7	20152.3	7051.09	8922.68	17283.1	11215.2	13549.4	16763.9	12784.1	16003.3	14221.1	19935.2	8775.32	18852.4	18545.9	5975.33	37232.8	13358.7	18757	9481.19	15897.7	25748.7	14080.1	24743.4	15898.7	10944.1	15083.1	18724.6	27437.5	24357.7
M391T461	[M+Na]+	Mitraphylline	0.117656	0.901517	0.526685	391.17	460.896	0.976235		C09227				463.479	2	7	9294.33	7187.53	8439.23	11602.7	9409.03	9252.04	9485.04	11921.1	10620.9	16280.7	10469.9	7929.04	7320.13	6852.54	11606.3	10617.4	9220.04	12280.8	9695.82	10728.3	6236.8	9303.33	10814.3	6226.75	8277.75	17297.3	10951.5	3715.77	10003.1	10708	9486	10318.2	4578.94
M188T300_2	[M+H]+	Molinate	1.56175	0.59486	0.252316	188.127	300.149	5.31522		C11086				305.364	10	10	37118.1	13480.2	12361.1	81534.5	23519.1	38876.3	213952	46227	14200.2	43687	331272	103652	17855	34441.6	32362.1	171484	60736.8	37873.7	279390	47386.8	118319	320901	28358.8	22647.1	34814	13655.8	26622.3	107757	49601.9	821075	25987.5	173877	72446.4
M240T219_1	[M+H]+	Monalide	0.476017	1.18439	0.355151	240.101	219.168	2.90056		C19053	Benzenoids	Benzene and substituted derivatives	Anilides	221.043	10	10	12425.5	11699	34416.8	26237.9	17483.1	17954.6	16847.7	18982	10622.1	21873.5	12610.3	19646.2	19397.8	7747.45	28806.7	15744.6	9621.28	10399.6	14071.1	9211.78	16092.3	11255.2	15221	15286.7	7385.13	22900.8	15115.7	7107.8	13646.5	12020.3	21476.7	13626.2	8241.22
M339T193	[M+H-H2O]+	Monoelaidin	0.36472	1.34472	0.157146	339.297	193.281	7.58061			Lipids and lipid-like molecules	Glycerolipids	Monoradylglycerols	199.952	5	6	16965.3	21634	13939	31323.3	21250.2	9510.28	4747.18	39914.4	16181.3	30872	10825.4	15112.9	32570.7	19736.4	11990.2	21138.4	37003.8	6350.85	29460.5	14759.1	35869.3	31184.6	32702.5	14522	36647.4	39453.1	14807.8	30461.3	24505.7	29536.7	14811	14921.5	27193.7
M762T507	[M+H]+	Montelukast acyl-.beta.-d-glucuronide	0.27855	1.45471	0.269504	762.274	507.161	3.85201						512.621	10	10	1401.13	3173.2	1558.03	19118.6	1937.14	16257.3	6986.53	14044.5	4236.63	5917.93	6224.46	4220.59	2675.56	7615.63	7332.79	7670.67	9976.1	15771.7	6474.51	12546.7	7929.34	2782.32	7044.85	6804.39	4801.48	3080.14	1398.88	17604.6	4167.67	7586.22	4621.81	5681.05	6175.41
M172T352	[M+H]+	Moroxydine	0.220928	1.10267	0.609744	172.144	352.392	5.72564			Organic nitrogen compounds	Organonitrogen compounds	Guanidines	375.344	10	10	17412.8	33617.2	14441.5	28614.4	19245	40324.7	21495.3	43393.1	46703.3	35497.5	32318.6	36717.5	25729	13599.3	13363.4	29082.3	48292	46611.3	38391.9	22231	38558.9	35790.6	15747.2	34542.2	44629.7	32005.9	21971.3	34844.4	23861.6	39218.4	26486.2	40923.1	36240.8
M506T260	[M-H+2Na]+	Morphine-3-glucuronide	0.384162	1.08271	0.7703	506.147	259.824	0.543707	HMDB0041936	C16643				261.87	10	8	3085.95	5698.91	9559.16	23274.3	853.593	28780.7	16982.9	27122.2	4347.01	22266.2	20893.1	8414.51	14403.5	11507.5	29933.6	18784.5	28296.6	24304.9	28310.7	12813.9	26611.3	15880	24501.1	25423.8	9672.34	18220.5	4307.06	29014.1	23196.4	18542.6	32662.8	13908.2	16452.2
M622T346	[M+H-H2O]+	Moxidectin	0.354908	0.825683	0.668919	622.353	346.348	2.50885			Phenylpropanoids and polyketides	Macrolides and analogues	Milbemycins	349.722	9	10	1122.17	53331.2	30921.3	25020.6	76064.2	13118.9	2304.37	10727.1	21389.4	16188.8	13162.2	5117.94	2633.39	20148.9	2925.42	5051.7	12075.1	22951.2	48632.4	33911.8	4124.11	47008.9	3779.39	4146.96	54077.1	3763.98	31311.5	31261.1	4855.2	9882.8	3014.87	25069.6	4699.01
M499T469	[M+Na]+	Mundulone acetate	0.219712	0.943188	0.615499	499.161	468.982	0.113633			Phenylpropanoids and polyketides	Isoflavonoids	Isoflavans	470.958	9	10	14889.4	15266.7	17389.8	17416	16561.6	18212.7	14554.3	20355.5	23748.7	18927.2	16280.8	12480.9	7269.73	15377.2	16253.1	20095.4	20425.5	26682	20369.9	31592	14221.5	12298.1	16916.7	10728.4	18588.7	8371.29	19427	15987.2	10351.6	23501.8	22551.4	18224.2	13658.8
M153T310	[M+H-CO]+	Myristicinaldehyde	0.278677	1.53487	0.173511	153.039	309.969	3.59002						311.906	10	9	3080.21	575.405	5781.02	1555.72	1391.62	6537.6	1424.62	4960.16	1552.6	803.134	5833.42	2231	726.727	4878.54	5658.1	2579.17	4110.67	4545.97	2200.07	6973.18	2302.68	1524.94	8232.61	1506.84	4714.74	1030.19	1320.81	1618.18	987.491	925.24	2654.89	1641.02	2852.03
M372T181	[M+H]+	Myristoyl-l-carnitine	0.45486	0.959288	0.80203	372.31	180.547	0.14758	HMDB0005066		Lipids and lipid-like molecules	Fatty Acyls	Fatty acid esters	188.603	10	10	17552	49627.6	12824.8	53285.7	20117.3	26446.5	93611.9	48365.9	43834.5	65448.1	51248.9	138981	47471.4	22996.7	49469.2	55484.2	51561.6	35738	97917.6	30612.6	66280.1	45989.9	33662.8	45289	34696.4	37878.6	22385.6	32685	36741.8	53222.5	61031.1	32766.5	38773.5
M492T35_2	[M+H-H2O]-	N-(1,3-dihydroxyoctadec-4-en-2-yl)tetradecanamide	1.73154	1.08289	0.817996	492.474	35.257	0.845462			Lipids and lipid-like molecules	Sphingolipids	Ceramides	55.418	8	10	153440	290632	154316	59529.7	218578	58685.7	187601	60356.7	301733	102882	102750	166351	133443	63427.2	92977.6	110522	92463	71820.9	77838.1	66289.4	87696.8	125065	108888	3398.34	50890.4	166567	172281	70543.9	116704	129908	61459.5	65149.3	73240.8
M257T378	[M+NH4]+	N-[1-(4-methoxy-6-oxopyran-2-yl)-2-methylpropyl]acetamide	0.62172	0.6507	0.202483	257.159	378.287	0.800036			Organoheterocyclic compounds	Pyrans	Pyranones and derivatives	395.731	9	10	86526.9	57464.6	73973.7	34382.2	158825	30183.2	26517.7	37043.6	94566.5	28249.9	55902.6	40517.7	38857.8	49522.8	47236	48732.9	45504.8	34861.3	21256.9	74233.3	30574	45121	30656.7	24446.4	92217.2	20242.1	85398.8	17701.6	23534.7	23935.3	36430.3	54698.4	37034.5
M141T261	[M+H-C2H7N]+	N1,n1,n2-trimethyl-n2-(4-piperidinyl)-1,2-ethanediamine	0.259734	0.974312	0.77785	141.137	261.418	2.6895			Organoheterocyclic compounds	Piperidines	Aminopiperidines	263.923	10	10	23258.5	21863.2	27469.6	22244.5	25041.6	15672.7	19194.1	17633.2	28020.9	22558.1	23027.6	28154.4	27428.6	24621.7	24097.5	18715.4	21583.8	22404.1	19651.7	26030.1	19222.7	18446.1	18409	19364.7	28797.8	25834.9	31313.1	15198.8	16885.4	19764.8	23423.5	24250	16365.2
M298T154	[M+H]+	N-3-oxododecanoyl-l-homoserine lactone	0.727628	0.884174	0.460375	298.179	154.463	2.87867		C21201	Organic acids and derivatives	Carboxylic acids and derivatives	Amino acids, peptides, and analogues	163.036	10	10	25973.4	35008.4	25245.1	62762.2	33140.5	76077.8	66517.6	80838.2	37968.9	85667.6	65235.8	68700.9	72272.1	64107.6	95687.1	50384.5	62477.2	65861	68639.4	48723.2	70305.1	52288.2	70233.2	75302.8	47575	82701.2	37197.9	51911.3	55530.9	55740.6	94628.2	79893.8	47722.1
M334T255	[M+H-H2O]+	N-3-oxohexadec-11z-enoyl-l-homoserine lactone	0.447449	1.03538	0.802496	334.236	255.014	0.709986			Organic acids and derivatives	Carboxylic acids and derivatives	Amino acids, peptides, and analogues	258.783	10	10	47649.6	73712.6	45817.8	76530.1	77328.2	28073	39717.8	63310.8	36751.7	69536.1	50083.8	51532.5	50172.6	39476.6	65747.5	56039.2	47940.3	45782.7	39428.7	55194.4	41540.9	49018.2	38559.6	46110.3	54488	40500.5	53525.6	38184.2	32054.3	32007.7	53401.5	51716.3	32164.9
M324T264	[M+H]+	N-3-oxotetradec-7z-enoyl-l-homoserine lactone	1.83082	1.29729	0.547485	324.236	264.226	4.44622			Organic acids and derivatives	Carboxylic acids and derivatives	Amino acids, peptides, and analogues	266.67	9	9	249895	242194	302382	91948.2	330517	17603.3	27834	16540.8	11157.4	22865.4	16744.1	87200.7	81384	75345.4	19996.2	18610.2	14815.9	54084.2	45834.4	248858	15709.9	125347	12873	27853.7	345523	107480	355141	8660.2	11367.4	76709.5	28993.5	220176	42313.9
M321T306	[M+H]+	N4-acetylsulfamethazine	0.564875	1.25005	0.251299	321.115	305.774	0.636899			Benzenoids	Benzene and substituted derivatives	Benzenesulfonamides	310.602	9	8	9290.58	17485.6	18511.8	36242.3	36652.5	53510.9	18564.7	55208.1	13699.8	29444.8	30995.8	25583.3	17937.3	41950.6	23307.5	32569	33977.7	26821	47562.2	33047	30953.8	9076.52	34033.9	21873.6	32170.2	16228	17683.6	32680.3	17154.5	28071.2	21815.7	23921.4	33280.9
M200T446	[M+H]+	N5-(1-imino-3-butenyl)-l-ornithine	0.426982	0.695641	0.207444	200.149	445.901	4.56839			Organic acids and derivatives	Carboxylic acids and derivatives	Amino acids, peptides, and analogues	463.606	5	7	21990.1	21509.7	12969.3	1297.94	11714.7	11688.3	1663.18	3938.94	18020.4	17659.6	4161.73	3372.47	26148.5	11801.8	6245.1	11566.2	11947.8	823.55	19034.3	14692.9	7197.83	3401.98	14279.2	7840.58	11277	12592.4	19033.5	18250.1	12988	11988.6	7649.29	5357.73	6650.87
M194T301	[M+2H]2+	N6-2-(4-aminophenyl)ethyladenosine	0.313256	1.06289	0.842321	194.091	300.942	0.268392						305.056	6	7	20452.7	5978.54	23480	13200	9813.54	8769.47	9695.41	8362.2	1410.25	7124.25	2623.2	9508.26	6753.65	15074	28688.1	7039.23	7526.97	8673.2	7210.24	16377.9	7584.58	3104.51	12845.2	6933.06	3227.36	5733.45	10678.8	8197.55	6306.78	6377.62	7644.71	1834.94	4232.05
M150T128	[M+H]+	N6-methyladenine	1.53385	1.9521	0.311343	150.076	128.29	3.93291	HMDB0002099	C08434	Organoheterocyclic compounds	Imidazopyrimidines	Purines and purine derivatives	135.666	10	8	146664	53428.6	179698	48043	122954	36477.7	76407.6	47316.8	19247.9	36658.9	35197	41757.2	29787.1	19250.5	122527	33041.4	27137.1	30392.5	22750.2	36664.3	39666.6	43803	24573.3	30139.5	14109.1	29535.3	46957.9	50044.9	17685	29938.1	22969.7	54202.1	41779.5
M189T551	[M+H]+	N6,N6,N6-Trimethyl-L-lysine	1.48599	0.890952	0.589788	189.159	550.885	5.15508	HMDB0001325	C03793	Organic acids and derivatives	Carboxylic acids and derivatives	Amino acids, peptides, and analogues	565.384	10	8	278540	39860.7	623637	722114	490194	446434	305477	95519.3	257576	295611	303383	324063	224644	576383	582721	69832.3	307540	54115.7	325256	588357	330423	380811	358146	216343	498864	232550	66187	418185	236783	57442	222698	479173	381111
M246T368	[M+Na]+	N-acetyl-d-galactosaminitol	1.12967	0.888758	0.588309	246.108	368.08	1.56791			Organic oxygen compounds	Organooxygen compounds	Carbohydrates and carbohydrate conjugates	380.358	9	8	15930.7	28305.7	21608.1	99884.7	21491.6	106985	64412.6	114897	92871.2	97261.2	113055	48090.7	81369.5	75936.7	104287	65621.1	113169	123100	114522	37667.9	160357	59261.7	96641.7	128046	29800.5	54087.1	30427	73770.2	76670.1	110485	115546	62248.5	87645.7
M204T254	[M+H-H2O]+	N-acetyl-d-glucosamine	1.04995	1.10798	0.643258	204.086	254.132	4.07143	HMDB0000215	C00140	Organic oxygen compounds	Organooxygen compounds	Carbohydrates and carbohydrate conjugates	255.601	10	10	131409	179336	173184	290260	317844	394065	176897	439199	197516	83525.3	298918	231094	47305.3	377453	432167	373080	394246	352182	167759	531679	352657	124565	435598	222628	301531	70578.2	229337	473291	105816	185602	145612	123842	180856
M308T35	[M+H-2H2O]+	N-acetyldihydrosphingosine	0.732686	1.04065	0.610082	308.294	34.981	0.175129			Lipids and lipid-like molecules	Sphingolipids	Ceramides	36.017	10	10	96027.7	209800	145001	140923	211114	178172	101147	172048	148822	201295	104458	87827.7	130383	164197	157169	93734	153817	103804	87741.2	163022	137620	98315.5	99060	358028	165515	121542	194651	194047	96109.3	81298.9	117363	105025	155349
M406T378	[M+Na]+	N-acetyl-d-lactosamine	1.5902	1.1564	0.565294	406.131	378.033	2.98618	HMDB0006583	C00611	Lipids and lipid-like molecules	Fatty Acyls	Fatty acyl glycosides	382.533	10	10	153573	361185	210565	221189	554665	392877	123464	629073	51565.1	266960	218250	76332.7	26859.4	250498	396238	240875	307951	303971	399771	502484	243068	334871	338020	60737.8	250443	44108.3	230554	420842	82995.5	213981	85285.2	171202	229900
M160T214	[M+H]+	N-acetyl-dl-valine	0.539514	1.09639	0.717847	160.107	213.842	2.1101	HMDB0011757		Organic acids and derivatives	Carboxylic acids and derivatives	Amino acids, peptides, and analogues	228.816	10	10	37138.4	16766.5	58666.5	28059.2	55782.4	13940.8	18457.3	17650.8	23801.7	20842.5	13896.5	13903	18605.6	23980.6	29178.7	18444.2	15475.1	21264.3	17843.9	24462.8	14069.4	19588.5	24631.6	13755.2	37229.5	20586.9	12690.1	18088.3	11527.2	18963.9	13605.7	18470.1	14088.1
M174T192	[M+H]+	N-acetyl-d-norleucine	0.863852	1.53937	0.407231	174.111	191.869	4.58892			Organic acids and derivatives	Carboxylic acids and derivatives	Amino acids, peptides, and analogues	214.534	10	10	18651.2	5213.47	138771	21570.7	29280.3	11628.2	15445.6	14386.7	32105.8	8955.05	23252.7	5423.46	12138.1	21313.9	17152	11116.2	16262.9	11016.9	11441.1	41978	12423	5902.1	10145.9	10678.3	11387.8	7466.74	35162.9	12411	6909.64	12771.5	11776.2	15871.7	11860.7
M465T254	[2M+Na]+	N-acetylglucosamine	0.468961	1.07924	0.818456	465.167	254.412	1.17852	HMDB0000215	C00140	Organic oxygen compounds	Organooxygen compounds	Carbohydrates and carbohydrate conjugates	256.411	10	9	8187.13	23349.2	16078.6	34135.6	76035.7	77726.4	18451.5	84786.6	14287.9	9882.7	37226.6	26930.8	8223.09	77257.3	55867.1	63006.4	51346.7	60902.3	17505.3	102989	40735	6595.69	72102.7	20347.9	61102.1	7958.6	10545.1	109345	6359.11	20402	9311.96	8917.42	25288.1
M154T149_2	[M+H]+	N-acetylhistamine	7.5127	0.970147	0.913463	154.097	149.145	5.05728	HMDB0013253	C05135	Organic acids and derivatives	Carboxylic acids and derivatives	Carboxylic acid derivatives	158.266	10	10	1.57121e+06	684655	1.55337e+06	3.93336e+06	1.3979e+06	4.51929e+06	3.38034e+06	3.94115e+06	1.19114e+06	4.4458e+06	5.45737e+06	2.02749e+06	383378	6.77476e+06	4.97513e+06	3.10385e+06	5.65358e+06	3.6517e+06	1.83494e+06	2.90786e+06	5.4056e+06	2.53842e+06	3.91318e+06	3.06323e+06	1.62138e+06	1.68214e+06	1.5393e+06	3.70683e+06	3.47333e+06	3.6966e+06	6.23992e+06	3.84509e+06	3.22422e+06
M269T299	[M+H]+	N-acetyl-l-carnosine	0.21113	1.07998	0.569684	269.111	299.424	8.35236			Organic acids and derivatives	Peptidomimetics	Hybrid peptides	310.524	9	9	25118.9	26079	31349.9	34860	34058.7	48891.9	40017.3	36286.7	32168.2	33579.2	29835.6	43582.7	29125.5	34705.4	64777.3	26141	57695.9	40195.3	27612.4	29227.3	48640.9	20737.3	50165.2	30788.4	35810.1	24321.5	40970.7	27402.2	28006.3	33630.9	42953.6	35029.3	35800.3
M182T302	[M+H-C2H2O]+	N-acetyl-l-tyrosine	0.846245	0.851196	0.527506	182.08	301.741	3.68248	HMDB0000866	C01657	Organic acids and derivatives	Carboxylic acids and derivatives	Amino acids, peptides, and analogues	312.823	10	10	32819.1	197492	79902.9	219353	264038	370988	77684.1	340959	163713	149270	178721	146677	75262.9	187788	180897	113807	96389.8	317996	165867	281976	133069	291809	120478	50324.9	445512	62539.9	146658	409812	39333.9	182144	104561	337040	101198
M623T303	[M+Na]+	N-acetylneuraminic acid dimer	0.747676	1.55055	0.270993	623.205	302.646	4.73424			Organic oxygen compounds	Organooxygen compounds	Carbohydrates and carbohydrate conjugates	304.268	10	8	3282.27	4393.8	4379.95	70116.4	6447.68	90462.5	30570.1	80153.8	7019.83	34711.1	28672.7	27013.5	10886.1	34852.8	37993.7	30241.3	54090.2	65518.9	27899.5	36426	38333.1	17971.5	54730	27631.4	14415.6	13013.6	4466.05	69802.9	31027.6	22825	35009.9	18454.9	38528.3
M184T317	[M+H-C2H2O]+	N-acetyl-o-fluoro-dl-phenylalanine	0.819031	0.930242	0.787528	184.071	316.678	5.70842			Organic acids and derivatives	Carboxylic acids and derivatives	Amino acids, peptides, and analogues	318.697	9	10	7176.38	10453.5	7646.87	57532.6	10739.6	75803.5	32018.9	55046.9	82437.1	86109.7	35446.7	31387.4	53490.6	28859.1	48232.2	52222.8	80006.1	72183.7	72376.8	15071.3	44760.4	39921.7	46291.9	75522.5	15286.7	40949.4	10216.6	72853	65986.6	39762.7	69582.3	36503.5	62921.5
M306T169	[M+H-2H2O]+	N-acetylsphingosine	2.61641	1.27508	0.230494	306.278	169.376	1.88414			Lipids and lipid-like molecules	Sphingolipids	Ceramides	177.623	10	10	297133	571217	865671	222701	637742	705767	287716	429183	105912	497015	367814	542879	191254	382971	355820	384051	637668	206536	186515	349339	563826	568549	339423	282997	309442	157869	702329	576099	232565	381898	182841	404893	628624
M189T391	[M+H]+	N-alpha-acetyl-l-lysine	2.49877	0.766713	0.589268	189.122	390.689	1.61886		C12989	Organic acids and derivatives	Carboxylic acids and derivatives	Amino acids, peptides, and analogues	397.54	10	10	5.75035e+06	403043	1.39044e+06	172848	953511	97192.6	149333	164695	1.5829e+06	204563	240269	285698	292280	292350	416786	99630.1	141234	92867.6	76251.1	352391	115420	109938	176460	87967.7	158519	95752.5	2.19668e+06	103717	110486	103455	72701.2	258121	147177
M115T208	[M+H-C2H4O2]+	N-.alpha.-acetyl-l-ornithine	0.140312	0.915685	0.666383	115.086	207.976	4.14329	HMDB0003357	C00437	Organic acids and derivatives	Carboxylic acids and derivatives	Amino acids, peptides, and analogues	222.877	10	10	38764.2	38807.8	48370.5	48073.9	39495.8	30944.1	35187.8	51593.9	42471.2	30339.4	35268.7	33694.1	12520.2	41345.4	94008.5	28306.3	28298.7	56551.3	23460.2	76231	42521.2	31040	55915	17032.4	47419.7	9698.78	33270.9	31938.5	19011.7	34264.4	16523.2	43181.4	23415.3
M144T204	[M+H-NH3]+	N.alpha.-methyl-l-lysine	0.129145	0.794641	0.439789	144.101	203.691	3.73039			Organic acids and derivatives	Carboxylic acids and derivatives	Amino acids, peptides, and analogues	208.744	7	6	12324.9	6794.82	8831.68	21734.7	32878.6	15644.6	7763.89	22680.4	6670.34	12488.7	22080	23218.6	12947.8	41347.6	33838.8	14919.7	13802.7	21248.5	11163.2	15191.3	13117.9	19484.1	10361.9	13165.1	19628.2	11388.3	6487.19	15144.6	12422.8	15353.6	26691.1	11057.3	7885.46
M247T371	[M+H]+	N-.alpha.-(tert-butoxycarbonyl)-l-lysine	0.724217	0.901758	0.343502	247.165	370.819	1.2221			Organic acids and derivatives	Carboxylic acids and derivatives	Amino acids, peptides, and analogues	395.731	10	10	56779	103945	45190.7	55750.2	80932.4	87125.5	52981.2	79652	78870.2	80927.6	117272	77841	94319.7	65965.5	100396	62988.9	77264.4	65818.2	72624.1	80989.5	62457.7	81480.8	94433.8	72683.2	61722.7	59804.4	156510	61740.7	75903.1	90965.4	85342.1	87750.7	66062.8
M238T375	[M+Na]+	N-.alpha.-(tert-butoxycarbonyl)-l-proline	0.518271	1.04952	0.847019	238.107	374.71	0.606293			Organic acids and derivatives	Carboxylic acids and derivatives	Amino acids, peptides, and analogues	388.71	9	8	35403.6	51471	25391.2	23602.8	30179.1	10617.1	6835.77	17547.5	32256.6	14323.2	32708.8	16720.7	10962	6988.34	13652	12333.9	14439.2	15648.9	9032.29	9167.07	9668.83	10679.4	8827.26	6015.61	11611.1	35289.1	23944.2	11090.9	10398.7	17996.1	23336.9	19137.6	20685.8
M240T317	[M+Na]+	N-.alpha.-(tert-butoxycarbonyl)-l-valine	0.673156	0.813837	0.50889	240.122	316.532	3.88733			Organic acids and derivatives	Carboxylic acids and derivatives	Amino acids, peptides, and analogues	317.835	8	8	10088.8	23109.8	15654.5	12316.1	12508.6	10658.9	4175.02	10774.4	55847.5	23792.9	5620.82	15521.8	15082.6	6012.97	10026.8	8353.76	15459.4	16541	19004.5	5810.39	9566.61	22040.2	6369.14	15303.3	5563.3	14682.9	15980.7	9671.45	16337.8	10183.9	13155.4	23530.4	10223.2
M360T219	[M+H]+	Napelline	0.285839	1.05861	0.755803	360.252	218.543	3.46077		C08700	Lipids and lipid-like molecules	Prenol lipids	Diterpenoids	231.149	10	10	24878.6	14496.6	12432.7	49071.7	14230.2	36905.1	41630.9	44173.7	25962.7	37842.8	38303.9	36287.2	36101.7	46836.2	41820.9	47583.8	40388.8	39851.9	35095.5	28469.6	39153	24174.8	28105.8	34178.7	25685	34690.5	83159	24971.4	29648.2	34624.7	37914.7	20800.4	37639
M406T243	[M+H]+	N-arachidonoyl-3-hydroxy-.gamma.-aminobutyric acid	2.54387	0.539704	0.214613	406.293	243.19	2.12876			Organic acids and derivatives	Carboxylic acids and derivatives	Amino acids, peptides, and analogues	246.25	9	10	85033.1	249712	83984.8	111035	269266	15287.1	145681	21162.3	522681	156486	49861.9	333271	194122	23484.9	57553.9	35588.6	12764.1	19231.2	68300.8	32391	82998	92736.6	24404.3	22126.9	15141.9	87725.9	82752.5	56556	34774.9	76455.8	112224	100093	18393.8
M376T112	[M+H]+	N-arachidonoyl-l-alanine	0.940766	1.36201	0.311152	376.303	111.803	1.00494			Organic acids and derivatives	Carboxylic acids and derivatives	Amino acids, peptides, and analogues	138.795	9	7	31139.7	29458.1	137384	48128.7	44970.2	28005.4	23036.1	21814.6	35227.1	31725.5	43749.6	13469.1	39710.6	29150.6	34868	36024.4	29152.9	42667.7	18090.5	37019	21317.6	36084	12336.9	34142.4	44258.8	27028.8	90025	38330	11351.9	23035.1	17203.3	32995	33461.9
M703T246	[2M+H]+	Naratriptan n-oxide	0.238929	1.33257	0.233094	703.331	245.545	0.834421			Organoheterocyclic compounds	Indoles and derivatives	Indoles	266.569	7	3	2163.19	2833.25	3608.69	10855.6	5053.78	12648.5	10868	11597	4744.55	10625.3	10395.1	7270.25	3997.27	5936.28	4493.75	25795.4	6459.47	30252.9	5127.89	3753.54	58309.3	5412.1	8046.37	25552.4	4153.17	8705.12	14844.4	8209.75	15713.2	4465.14	3626.92	8198.84	14167.2
M581T441	[M+H]+	Narirutin	0.209074	0.751002	0.138815	581.178	441.022	0.999765		C09793	Phenylpropanoids and polyketides	Flavonoids	Flavonoid glycosides	444.318	4	5	3135.2	2063.84	950.967	3415.95	3283.9	3976.48	3137.6	1714.98	2956.01	3495.24	3108.04	3865.52	3568.65	2948.46	2698.26	3263.2	3257.09	3277.29	4706.22	3512.17	3890.15	2311.05	2439.38	3424.93	3275.9	5121.4	2369.24	2572.88	3892.04	1323.21	7157.25	3730.26	2721.79
M149T35	[M+H]+	N-benzylacetamidine	0.434364	1.04435	0.552251	149.132	34.507	1.17048						37.852	10	10	114982	150058	174083	154086	176453	198673	125094	249876	143632	192038	189190	165675	190110	164320	208920	158292	201922	175492	184794	179943	171688	129634	194619	209050	175498	171358	180011	186385	163848	149704	226536	160846	172734
M180T188	[M+H-H2O]+	N-benzylideneaniline n-oxide	0.448658	1.15518	0.716518	180.101	188.339	1.68232						202.474	9	7	23790.6	31072.7	62274	31750.7	48376.1	33949.8	42061.4	20418.8	22470.1	45267	41031.1	52244.4	120103	19142.5	33264.2	67323	46871.8	18422.7	53506.2	36994	94544.4	60094.3	37285.9	25734.1	15450.4	191445	25808.8	45638.7	99105.9	71941.3	166741	15732.6	26517.3
M205T531	[M+H]+	N-benzyl-n-methylpiperidin-3-amine	0.884432	0.970096	0.9243	205.154	530.775	1.09284			Benzenoids	Benzene and substituted derivatives	Phenylmethylamines	557.217	10	9	37471	8362.88	44396	70746.9	13495.2	116173	25398.8	23406.8	47458.1	19619	62268.6	98686.4	15810.8	105856	134593	66322.4	98047.2	62241.1	15768	129921	44534.2	81360	106680	22639	131835	61822	12124.6	16177.9	37069.7	14933.9	10189.8	119484	78837.8
M140T106_2	[M+H-2H2O]+	N-carboxyethyl-.gamma.-aminobutyric acid	4.1966	0.841096	0.519318	140.081	105.853	4.85112	HMDB0002201		Organic acids and derivatives	Carboxylic acids and derivatives	Amino acids, peptides, and analogues	111.166	10	10	376069	106121	341385	1.30372e+06	233023	1.39416e+06	887362	1.0941e+06	629038	780995	1.04327e+06	742957	488809	914984	2.13894e+06	802901	1.09488e+06	1.06344e+06	678472	649629	1.02653e+06	513337	1.35671e+06	1.33658e+06	400473	311932	185111	1.06963e+06	665001	722402	713582	938598	999030
M233T391	[M+H]+	N-desbutylbupivacaine	0.543983	1.13501	0.524031	233.148	390.7	2.4816	HMDB0060725		Organic acids and derivatives	Carboxylic acids and derivatives	Amino acids, peptides, and analogues	394.199	9	10	61632.1	29862	51447.5	19261.4	41215.9	19688.8	24151.7	25140.1	27934	29831.6	24190.5	34164	32543.1	27814.7	47109.6	31208	27322.7	38499.3	26123.5	27207.5	25487.6	19601.4	69804.3	22054.6	19629.7	48560.2	32013.2	21351.6	39502.1	29280.9	32452.7	22437.1	20119.8
M544T25	[M+H-H2O]+	N-(dodecanoyl)sphing-4-enine-1-phosphate	0.947281	0.494953	0.256353	544.413	24.8695	2.39475	HMDB0010699		Lipids and lipid-like molecules	Sphingolipids	Phosphosphingolipids	37.447	8	7	120860	7854.36	15971.8	8070.03	43600.6	15036.8	68180	5962.33	4018.04	44718.2	20876	58080.3	37817.9	40020.3	263850	12074.6	58371.5	6342.92	50905.7	105443	7815.28	43068	48780.9	5502.09	51415.7	6963.32	7751.29	7386.1	11048.6	7836.99	32724.6	7435.26	49051.3
M467T56	[M+H-C5H11NO]+	Nelfinavir	0.636058	0.770796	0.417635	467.214	55.926	0.655697	HMDB0014365	C07257	Organic acids and derivatives	Carboxylic acids and derivatives	Amino acids, peptides, and analogues	65.081	9	6	5367.91	4806.1	10119.6	10553.5	5188.14	25674.6	43908.4	19530.4	15570.6	28894.8	37415.3	28130.2	18849.8	14669.5	18013.3	28522.2	22046.3	9639.71	2841.93	20866.5	26616.3	13864	49788.8	25390	12435.5	19067.9	12593.3	56147	38623.2	31403.1	14750.2	41487.4	47199.5
M410T260	[M+H]+	Nervonoyl ethanolamide	0.359874	1.02988	0.902187	410.408	259.736	0.0406138			Organic nitrogen compounds	Organonitrogen compounds	Amines	263.134	10	10	7623.61	22585.8	8544.28	26415.1	11743.3	51208	24016.8	40259	24315.5	16510.3	78016.6	45139.7	42675.7	40309.5	26320.6	60615.7	38861.1	54659.1	49921	40168.2	51798.6	32297.9	25977.1	40244	23363.8	18904	15680.4	34954.5	22999.9	34836.4	46836.6	52041	26058.1
M145T313_2	[M+H-CH3ON]+	Ng-amino-l-arginine	1.70162	1.01057	0.970443	145.133	312.581	0.191612			Organic acids and derivatives	Carboxylic acids and derivatives	Amino acids, peptides, and analogues	315.045	10	10	33380.4	180853	144829	399600	100546	448503	211240	311117	127501	490054	322049	356922	96101.1	284565	166104	185122	460318	381735	289448	140358	246308	255570	170684	252009	200996	65877.8	156659	442343	221724	383098	192266	362596	278031
M172T265	[M+H-CH5N]+	Ng,ng-dimethyl-l-arginine	0.392025	0.752994	0.370821	172.096	264.803	7.9459	HMDB0001539	C03626	Organic acids and derivatives	Carboxylic acids and derivatives	Amino acids, peptides, and analogues	268.701	10	10	23645.3	8653.67	25504.3	18132.2	18441.4	15501.3	36324.3	20310.4	16874	19027.8	20782.4	18246	11290.1	20760.5	79052.5	15609.4	21948.5	21972.2	14993.3	30543.7	19041.6	15883.9	29307.7	11288.4	14594.8	9038.64	15695.2	28567.7	10842.6	18560.5	18748.7	17604.2	18377.1
M196T172	[M+H-H2O]+	N-heptanoyl-l-homoserine lactone	0.489552	0.98022	0.921553	196.111	172.401	1.0883			Organic acids and derivatives	Carboxylic acids and derivatives	Amino acids, peptides, and analogues	192.063	9	8	12770.6	9419.4	14360.1	42660.7	12437.5	36019.7	34734.3	33945.3	20100.6	32708.2	44098.4	19477.2	29388.1	33655.2	41056.3	29957.8	41806.5	33769.8	28321.4	21867.8	34823	21664.2	27094.8	41564.2	25793.6	28862.6	12430.1	34144	30103.5	22922.5	38078.2	28125.9	26305.9
M123T63_2	[M+H]+	Niacinamide	2.34181	0.950278	0.893396	123.054	63.2895	6.75317	HMDB0001406	C00153	Organoheterocyclic compounds	Pyridines and derivatives	Pyridinecarboxylic acids and derivatives	64.279	10	10	145607	297507	63874.1	992505	356412	953806	559875	351973	53444.7	397829	960266	527241	446035	1.38148e+06	466176	516365	1.05886e+06	1.28181e+06	480813	1.4047e+06	497189	432162	365295	393287	3.33756e+06	299680	82097.5	541247	354701	1.16874e+06	1.03775e+06	392631	216731
M281T182	[M+H-H2O]+	Nialamide	0.564424	0.933669	0.434304	281.116	181.671	6.66707			Organoheterocyclic compounds	Pyridines and derivatives	Pyridinecarboxylic acids and derivatives	189.424	10	10	33544.8	39899.3	27378.9	33350.7	34332.5	26902.5	31181.6	36025.4	50930.4	42258.6	31833.7	48123.6	49173.6	30672.7	40246.5	28314	38292.7	40161.7	36480.2	44240.2	33109.6	33059.6	29066.7	40986.3	43286.8	43405	38456.2	25847.6	30299.7	28093.7	47631.1	40110.2	28109.9
M139T154	[M+H]+	Nicotinamide n-oxide	0.822508	0.751783	0.655053	139.049	154.254	7.57383	HMDB0002730		Organoheterocyclic compounds	Pyridines and derivatives	Pyridinecarboxylic acids and derivatives	169.041	9	9	247755	36200.1	780218	51155.6	345969	22739.5	519494	20924.9	17454.9	309375	88151.1	114318	19308.6	297434	1.27284e+06	79319.7	50838.3	21586.8	19226.3	744655	24533.1	99243.7	432453	13000.5	25269.8	6707.34	71013.8	58872.6	13029.3	12281.3	9438.92	34855.3	85851.6
M124T218	[M+H]+	Nicotinate	1.56818	0.904288	0.709448	124.038	217.833	2.96907	HMDB0001488	C00253	Organoheterocyclic compounds	Pyridines and derivatives	Pyridinecarboxylic acids and derivatives	223.126	10	10	575536	356811	669352	257744	601303	365285	352411	469832	1.31682e+06	320655	919400	514909	336269	839658	844861	383622	490879	400431	261004	686428	436254	262445	479082	312690	261693	198612	842966	157069	267990	280627	455200	473352	332022
M209T83	[M]+	Nicotinoylcholine	2.11914	1.47743	0.228552	209.116	83.325	3.15673			Organoheterocyclic compounds	Pyridines and derivatives	Pyridinecarboxylic acids and derivatives	85.518	10	10	41533.3	52890.6	138734	451722	82030.5	383886	167250	860757	54824.7	286972	447294	220792	267781	347083	516017	420497	443799	470882	475248	359727	314294	260654	458748	259824	152621	317191	215874	362846	275518	312799	902898	292621	397962
M758T245	[M+H-H2O]+	Nis(monooleoylglycero)phosphate (s,r isomer)	0.348431	0.782432	0.483173	757.514	245.315	0.616753			Lipids and lipid-like molecules	Glycerophospholipids	Lysobisphosphatidic acids	247.711	10	10	6080.72	10621.2	5830.76	8982.18	7022.61	19588.2	9427.84	10913.5	6153.13	12241.7	13473.8	15769.8	11357.4	8266.99	9397.6	16578.9	11431.5	8467.74	10584.3	9436.13	16761.3	8998.81	9309.33	12278.2	7227.31	10046.9	7107.04	12295.3	12649.6	16177.8	12892	9557.93	6123
M669T244	[M+Na]+	N-lauroyl-d-erythro-sphingosylphosphorylcholine	1.0469	0.916193	0.743203	669.488	244.419	3.50304	HMDB0012096		Lipids and lipid-like molecules	Sphingolipids	Phosphosphingolipids	247.071	10	10	76694.4	103927	71218.7	45814.8	77789	23167.6	68168.6	70098.6	136618	50693.7	28774	50903	80502.7	25897.9	33299.4	48136.5	25639.9	40948.6	45166.6	72309.6	47015.3	64307.2	26222.1	38787.3	53856.1	43470.7	57366.4	13822.9	23434.4	45590.6	43135.4	41507	18059.5
M166T160	[M+H]+	N-methyl-3,4-(methylenedioxy)benzylamine	0.64699	0.877871	0.82913	166.071	159.85	2.30856						169.774	4	6	834720	37504.6	348300	30229.7	221417	14434.7	122952	26847.4	35243.5	65491.5	52038.6	70916.6	29756.9	34780.2	455015	33152.9	40736.2	45621.8	51799.1	95695.8	40342.1	37311.4	41846.6	15407	40585.7	24766.2	56012.5	29528.7	11708.4	14674.5	721.623	54646.9	27422.8
M108T238	[M+H]+	N-methylaniline	0.322235	0.874694	0.332824	108.08	237.614	0.358538		C02299	Organic nitrogen compounds	Organonitrogen compounds	Amines	240.417	10	10	17087.3	6818.45	14539.7	14801.9	21228.2	24489.3	14242.8	19322.8	18121.3	18621.4	17458.8	14688.3	15722.9	25292.3	29995.7	17523.6	22287.4	29843.4	14331.9	24451.8	29515.2	14044.3	24897.1	12495.3	20782.4	15449.8	9187.88	12418.1	17684.4	18486.5	23177.8	9900.33	16845.5
[truncated: 12,963 more rows]
[truncated: 26 more columns]

## Sheet: OXA_vs_C-2
ID	adduct	Name	VIP	Fold change	p-value	m/z	rt(s)	PPM	HMDB	KEGG	SuperClass	Class	SubClass	rtmax	ACBP.OXA	C.2	P-21-4	AC-14-4	AC-15-4	AC-17-4	C-4-2	AC-12-4	AO-43-4	AC-13-4	C-1-2	P-24-4	AO-45-4	AO-47-4	C-9-2	C-8-2	C-7-2	AO-50-4	AC-20-4	AO-49-4	AO-44-4	P-29-4	O-39-4	AO-46-4	AO-42-4	O-38-4	O-40-4	AC-18-4	P-23-4	P-27-4	O-36-4	AO-48-4	O-34-4	C-3-2	AC-11-4
[truncated: 820 more rows]
[truncated: 26 more columns]

## Sheet: ACBP-OXA_vs_C-2
ID	adduct	Name	VIP	Fold change	p-value	m/z	rt(s)	PPM	HMDB	KEGG	SuperClass	Class	SubClass	rtmax	ACBP.OXA	C.2	P-21-4	AC-14-4	AC-15-4	AC-17-4	C-4-2	AC-12-4	AO-43-4	AC-13-4	C-1-2	P-24-4	AO-45-4	AO-47-4	C-9-2	C-8-2	C-7-2	AO-50-4	AC-20-4	AO-49-4	AO-44-4	P-29-4	O-39-4	AO-46-4	AO-42-4	O-38-4	O-40-4	AC-18-4	P-23-4	P-27-4	O-36-4	AO-48-4	O-34-4	C-3-2	AC-11-4
[truncated: 142 more rows]
[truncated: 26 more columns]
