# Supplementary material for: Comprehensive 16s rRNA sequencing and metabolomics to investigate the effect of anticancer bioactive peptides combined with oxaliplatin on gastric cancer
Source: Research Square preprint supplement (doi:10.21203/rs.3.rs-6875583/v1), 2025-07-22
Supplement: Supplementary file 2 [file 7ebd5fc95c2d480b98c02cec.xlsx]

## Sheet: ACBP_vs_C-2
ID	adduct	Name	VIP	Fold change	p-value	m/z	rt(s)	PPM	HMDB	KEGG	SuperClass	Class	SubClass	rtmax	ACBP.OXA	C.2	P-21-4	AC-14-4	AC-15-4	AC-17-4	C-4-2	AC-12-4	AO-43-4	AC-13-4	C-1-2	P-24-4	AO-45-4	AO-47-4	C-9-2	C-8-2	C-7-2	AO-50-4	AC-20-4	AO-49-4	AO-44-4	P-29-4	O-39-4	AO-46-4	AO-42-4	O-38-4	O-40-4	AC-18-4	P-23-4	P-27-4	O-36-4	AO-48-4	O-34-4	C-3-2	AC-11-4
M351T56	[M-H]-	Tebufenozide	1.05219	0.763556	0.00955049	351.185	55.696	8.67161		C18526	Benzenoids	Benzene and substituted derivatives	Benzoic acids and derivatives	68.24	10	9	180589	192480	199762	245506	254418	151498	195426	163846	173238	377050	197022	236978	252499	229840	326023	141236	201864	209762	290283	308387	196044	234578	109826	139945	287180	230025	263876	129722	104806	196847	283734	287629	161494
M271T43	[M-H]-	Sempervirine	1.02611	1.62934	0.0309439	271.108	42.502	2.61276		C09240	Organoheterocyclic compounds	Indoles and derivatives	Pyridoindoles	47.833	10	9	48796.6	43076.2	48013.8	70430.2	43363.6	112277	89142.6	63249.8	44715.5	118236	132258	38025.1	84389.9	33460.3	39033.3	36246	144954	88067.6	86215.6	65399.6	91337.9	52665.3	67905.2	160419	63352.2	53735.3	115179	75840.4	123842	68209.3	136910	43109.8	118582
M181T72	[M-H]-	(n-(-2-acetamido))-2-aminoethanesulfonic acid	1.28974	0.813473	0.0340837	181.017	72.43	1.2804			Organic acids and derivatives	Organic sulfonic acids and derivatives	Organosulfonic acids and derivatives	83.479	10	10	1.08094e+06	398704	380676	397746	399891	364411	421153	456652	517405	421598	508589	532385	644056	429722	595795	378556	445375	446907	413083	530211	452206	417934	292586	383049	331252	347009	448339	317566	335506	339180	675896	600131	315192
M161T302	[M-H-C6H12O6]-	D-turanose	1.72678	1.93909	0.0362471	161.046	301.973	0.412807	HMDB0011740	C19636	Lipids and lipid-like molecules	Fatty Acyls	Fatty acyl glycosides	306.617	9	9	119922	61915	81764.8	263249	172869	454523	311442	274405	93001	400136	104940	92600.4	50934.3	151539	104148	81344.6	205557	338819	100709	124083	203610	56942.8	101678	119662	220989	48540.7	62694.1	394405	154847	148491	120796	102071	85615.5
M295T56_2	[M-H]-	12(13)-epoxy-9z-octadecenoic acid	17.7346	1.51293	0.0433112	295.228	56.19	1.79827	HMDB0004702		Lipids and lipid-like molecules	Fatty Acyls	Fatty acids and conjugates	58.833	10	10	7.43154e+06	3.55047e+06	1.83865e+07	1.84263e+07	8.97241e+06	1.70013e+07	1.06194e+07	2.4163e+07	2.79005e+06	1.60184e+07	1.59511e+07	8.73839e+06	1.00787e+07	1.05947e+07	1.3365e+07	1.50667e+07	1.42081e+07	1.32254e+07	1.51708e+07	1.35854e+07	1.07933e+07	1.07279e+07	1.37113e+07	1.33577e+07	9.07987e+06	1.08391e+07	1.49769e+07	1.22021e+07	9.49758e+06	9.38618e+06	1.72291e+07	1.0646e+07	1.49888e+07
M391T160_2	[M-H]-	Deoxycholic acid	24.6472	0.467598	0.050738	391.285	160.165	1.29932	HMDB0000626	C04483	Lipids and lipid-like molecules	Steroids and steroid derivatives	Bile acids, alcohols and derivatives	163.414	10	10	1.13666e+06	2.70014e+07	880237	6.27519e+06	2.88091e+07	5.94556e+06	1.30168e+07	1.50165e+07	2.75788e+07	2.34454e+07	1.28572e+07	4.25505e+07	7.35106e+07	8.98898e+06	1.35844e+07	1.13793e+07	1.11662e+07	1.12287e+07	1.95429e+07	1.28354e+07	2.32601e+07	1.0455e+07	9.05717e+06	1.90855e+07	8.1668e+06	2.85627e+07	1.97203e+06	1.08252e+07	2.11224e+07	2.01572e+07	5.2004e+07	2.63635e+07	8.17221e+06
M295T104_2	[M-H]1-	9-hydroxy-10e,12z-octadecadienoic acid	1.37331	0.454276	0.0564264	295.228	103.717	2.60391	HMDB0062652		Lipids and lipid-like molecules	Fatty Acyls	Lineolic acids and derivatives	117.446	7	7	20460.1	11503.9	90500.2	60812.2	56799.3	56826.6	86954.2	105666	17773	133268	74895.3	61611.2	35917.2	365903	187652	67653.2	108229	132890	472621	341432	86235.7	94039	120173	59685.5	36601.3	42511.8	82564.1	96794.7	50798.3	46093	476103	53873.2	65740.6
M496T102	[M-2H]2-	Microcystin lr	2.08466	0.471852	0.0570727	496.274	102.148	0.280288		C05371	Organic acids and derivatives	Peptidomimetics	Hybrid peptides	125.066	10	9	139023	281811	448468	489074	308807	425501	196231	326991	365535	203717	652073	448965	143812	321893	658449	585640	165753	421257	249155	349439	862122	131006	419640	451186	525227	88971.4	570071	354618	549476	397944	553309	1.54025e+06	179657
M583T32	[M-H]-	Ouabain	1.80391	0.588777	0.0633656	583.294	31.646	2.71043	HMDB0015224	C01443	Lipids and lipid-like molecules	Steroids and steroid derivatives	Steroid lactones	35.104	10	10	38588.3	186108	54838.1	157841	218339	148542	172276	188271	137877	226665	211896	469974	570002	178784	144745	129380	189395	221134	314777	159053	311261	142598	131420	177591	169816	222216	75833.4	162217	255173	249621	545260	413166	180234
M816T193_1	[2M-H]-	.beta.-muricholic acid	4.97506	0.233379	0.0696838	815.57	192.694	3.16242	HMDB0000415	C17726	Lipids and lipid-like molecules	Steroids and steroid derivatives	Bile acids, alcohols and derivatives	197.508	10	10	25452.9	1.04577e+06	9509.75	74109	1.19692e+06	95342.5	139426	171098	276396	636104	203146	4.08807e+06	2.64138e+06	101910	99350.9	196970	58749.5	188538	269899	127993	438202	77649.9	103274	164399	113064	126747	18458.4	207005	205449	380778	2.30553e+06	1.56883e+06	52121.4
M407T227_2	[M-H]-	Cholic acid	15.1837	0.506202	0.0701816	407.28	226.616	2.84394	HMDB0000619	C00695	Lipids and lipid-like molecules	Steroids and steroid derivatives	Bile acids, alcohols and derivatives	237.09	10	10	1.84624e+06	1.51501e+07	1.70527e+06	1.67953e+06	1.35776e+07	2.12003e+06	3.09158e+06	2.38691e+06	1.15359e+07	5.98316e+06	3.15331e+06	1.59232e+07	2.06836e+07	3.37798e+06	3.96012e+06	3.09955e+06	2.23741e+06	3.3012e+06	3.67375e+06	3.60636e+06	5.16457e+06	2.57934e+06	2.74252e+06	2.30351e+06	3.71732e+06	5.28272e+06	2.28458e+06	2.24913e+06	6.3515e+06	4.60416e+06	1.30925e+07	9.52713e+06	1.82717e+06
M165T158_2	[M-H]-	3-(3-Hydroxyphenyl)propanoic acid	5.95603	1.62626	0.0730776	165.056	157.969	2.01033	HMDB0000375	C11457				162.125	10	9	595336	1.01581e+06	3.91214e+06	2.06138e+06	706831	2.7483e+06	1.52369e+06	2.18133e+06	146553	927575	2.17922e+06	1.5526e+06	841293	1.49795e+06	934519	2.14394e+06	2.31227e+06	2.78269e+06	1.3603e+06	1.25913e+06	3.20118e+06	2.18817e+06	2.4683e+06	1.86048e+06	1.46559e+06	724778	1.21701e+06	2.12363e+06	971611	2.0081e+06	685568	1.25743e+06	1.86175e+06
M329T163_2	[M-H]-	(z)-5,8,11-trihydroxyoctadec-9-enoic acid	6.52456	1.41414	0.0949044	329.233	162.633	0.484646			Lipids and lipid-like molecules	Fatty Acyls	Fatty acids and conjugates	166.815	10	10	1.38918e+06	897616	2.79317e+06	2.38531e+06	1.95609e+06	2.52703e+06	2.40723e+06	3.51046e+06	663967	1.92034e+06	2.23879e+06	1.33409e+06	1.12749e+06	1.82174e+06	2.64456e+06	2.09893e+06	1.95634e+06	1.88571e+06	1.91522e+06	2.72751e+06	2.30478e+06	1.39759e+06	2.16411e+06	2.096e+06	2.31494e+06	1.5357e+06	2.81235e+06	1.93185e+06	1.47098e+06	1.56864e+06	2.46936e+06	1.64519e+06	2.83235e+06
M495T30	[M-H]-	7.alpha.,17.alpha.-dimethyl-5.beta.-androstane-3.alpha.,17.beta.-diol glucuronide	1.38554	0.734743	0.0956009	495.279	30.2	3.76939			Lipids and lipid-like molecules	Steroids and steroid derivatives	Steroidal glycosides	47.195	9	9	161415	464038	358749	237212	479105	299865	392605	415456	786210	373268	330963	645011	594326	197548	154409	246298	333571	353014	557158	241177	460697	429296	229735	531070	264587	275581	363808	320268	315642	326203	541722	409034	283113
M108T45	[M-H-NO]-	3-nitrophenol	1.03079	0.800133	0.0959372	108.045	44.5435	0.187484		C14418	Benzenoids	Phenols	Nitrophenols	48.503	10	10	158838	67069.3	94072.1	99233.2	87809.6	135456	110271	101972	81044.3	82583	174557	113193	139165	111097	181039	139139	112434	155412	111401	129552	105029	109167	126433	88444.2	90483.7	72676.3	90235.2	85434	107043	141695	110991	156023	85305
M349T217	[M-H-H2O]-	11-dehydrothromboxane b2	0.830798	1.16847	0.589502	349.202	216.514	0.428401		C05964	Lipids and lipid-like molecules	Fatty Acyls	Eicosanoids	221.907	10	10	47918.5	78955.3	19037.2	50688.5	89009.6	78202.1	49052.4	116958	120848	116659	56529.7	92838	145885	52155.8	66493.4	106700	53649.9	43138.5	62617.8	34936.3	148697	83974	52245	76400.5	31119.2	171961	26270	58194.3	100536	65483.5	57475.2	27843	42603.5
M347T218	[M-H]-	11-deoxy-11-methylene-15-ketoprostaglandin d2	0.143624	1.36576	0.416219	347.244	217.914	4.17906			Lipids and lipid-like molecules	Fatty Acyls	Eicosanoids	230.497	8	10	150260	194391	46012.5	73900.2	202175	162437	37929.9	43010.6	52563.2	38622.4	255881	38791.9	54485.6	40285.1	47683.7	34191.3	43374.3	43301.9	44734.4	210527	37765.9	149462	72111.6	33010.4	218119	35079.9	51602	31994.7	23240.2	30453.1	78972.1	148434	136957
M311T161	[M-H-H2O]-	11-hydroxy-.delta.9-tetrahydrocannabinol	0.412044	1.23415	0.607642	311.196	161.245	8.6827	HMDB0060906		Organoheterocyclic compounds	Benzopyrans	1-benzopyrans	169.203	5	7	1709.98	3068.3	10213.3	41307.4	7475.62	5348.48	6869.68	43338.7	9512.15	8356.01	7473.51	3605.99	13609.4	7888.22	4359.31	26637.4	7326.15	4589.75	42063.1	9039.48	11556.4	26556.2	43617.6	29329.7	8652.68	24338.2	6725.06	7192.66	24483.6	22900.3	37809.2	27650	3353.34
M343T167	[M-H]-	11-nor-9-carboxy-.delta.9-tetrahydrocannabinol	0.503177	1.00133	0.993501	343.212	167.18	0.43055			Organoheterocyclic compounds	Benzopyrans	1-benzopyrans	174.469	7	6	144026	71343.6	101578	140331	104971	117149	110407	264962	122701	155019	127248	79612.8	113081	176271	101361	154827	124934	161893	131413	140585	72753.4	167198	121712	129108	154284	134055	220550	141829	44850	129784	219716	148710	55233.6
M547T189	[M-H]-	1-[2,4,6-trihydroxy-3-[7-hydroxy-2-(4-hydroxyphenyl)-3,4-dihydro-2h-chromen-4-yl]phenyl]dodecan-1-one	0.678837	0.758011	0.253201	547.295	188.783	2.33089			Phenylpropanoids and polyketides	Flavonoids	Hydroxyflavonoids	193.688	10	10	32699.9	80321.5	13344.7	39012.5	35547.7	23933.4	55898.9	64063	77885.9	49121.5	49715.6	122786	136758	30231.7	51978.6	36788.3	46042.2	33107.3	52632.5	36196.2	76071.5	31262.3	32026.9	48056.4	27319	87307.4	20595.1	32834.5	58426.3	76542.1	96005.5	47818	34223.6
M160T331	[M-H-C2H2O]-	1-(2,8-dihydroxyquinolin-5-yl)ethan-1-one	0.838235	0.98432	0.961777	160.04	330.882	1.92808			Organoheterocyclic compounds	Quinolines and derivatives	Quinolones and derivatives	347.917	6	2	18093.9	53442.8	13439	211008	26338.7	129429	218318	147407	86183.3	200819	131067	172629	91227.8	107246	88862	228580	325643	275524	39381.1	51614.7	99237.8	98441.6	272197	269076	55985.2	38162.9	20919.2	240248	276097	25782.9	386599	186204	183371
M875T159	[M+HCO2]-	1,2-diarachidonoyl-sn-glycero-3-phosphocholine	0.213817	0.921856	0.783813	874.547	159.212	0.327605	HMDB0008443		Lipids and lipid-like molecules	Glycerophospholipids	Glycerophosphocholines	164.104	7	8	11739.6	5088.47	6736.93	6223.9	13351.8	6260.45	6388.89	10343.7	8490.03	9784.97	17170.9	6327.19	9285.62	28210.8	11386.2	7698.16	13359.7	13154.7	9752.5	13934.6	10095.8	3518.41	6865.28	6616.4	20071.6	13663.5	10045.2	5744.06	7522.8	30175.7	16453.5	9707.36	2161.68
M656T316	[M+Cl]-	1,2-dilauroyl-sn-glycero-3-phosphatidylcholine	0.0287921	0.685214	0.279186	656.411	315.83	1.36427			Lipids and lipid-like molecules	Glycerophospholipids	Glycerophosphocholines	321.924	6	8	841.966	2332.99	7991.41	3267.99	8410.82	5007.27	942.039	1677.3	1690.15	2776.7	4865.26	824.393	616.233	4912.69	1032.16	726.309	1253.46	2573.42	3905.62	3540.59	784.715	5752.74	857.997	601.209	10259.4	828.664	7295.91	6103.14	778.366	1416.53	1010.04	6660.73	897.017
M381T256	[M-H-C14H26O]-	1,2-dimyristoyl-sn-glycero-3-phosphate	0.391888	1.00963	0.954228	381.228	256.396	0.466446			Lipids and lipid-like molecules	Glycerophospholipids	Glycerophosphates	259.482	10	10	79916.4	68054.2	41881.7	73152.4	22304	46710.5	49123.5	66885.4	62435	39229	42825.1	78266.3	47273.1	67771.3	28166.1	38506.3	53023	99070.4	40039.9	68579.3	116848	31655.3	26216.8	40296.4	88275.6	44647.3	64240.1	51914.3	78847.8	86885.9	57091.6	26865.8	26466.9
M770T36	[M-H-NH3]-	1,2-dioleoyl-sn-glycero-3-phospho-l-serine	0.544497	0.997993	0.989882	769.507	36.494	2.56339	HMDB0012390		Lipids and lipid-like molecules	Glycerophospholipids	Glycerophosphoserines	37.966	8	5	45895.4	31213	31439.3	60076.8	28678.3	70610.9	48421.2	57164.2	21574.9	66395.5	75770.2	35075.9	48926	52335.3	43699.1	41226.5	56163.2	58340.9	48568.6	47679.7	63914	56303.9	39788.9	40277	120085	39364.9	56436.4	50765.5	42134.3	44505.5	63256.2	49538.5	63020.6
M774T36	[M-H-NH3]-	1,2-distearoyl-sn-glycero-3-phospho-l-serine	1.0384	0.822826	0.582676	773.536	35.6925	0.474333	HMDB0012378		Lipids and lipid-like molecules	Glycerophospholipids	Glycerophosphoserines	57.021	9	9	221001	150897	255336	205720	275398	271734	132085	223578	29093.4	197447	371330	26096	156053	1.03004e+06	178837	116812	246372	308015	203880	401202	239234	189583	57472.2	139825	1.44527e+06	251724	375972	163195	87304.6	357995	233904	262372	143588
M704T106	[M-H]-	1,2-Distearoyl-sn-glycerol 3-phosphate(PA(18:0/18:0))	0.635588	0.917884	0.758752	703.516	105.515	2.81541						116.039	9	8	25009.3	17660.1	40024.4	77520.8	35218.6	58262.5	30323.8	36422.6	26128.2	54511.5	37043	30861.3	49853	130829	89288.2	49337.5	38273.4	29964.6	17095.7	157349	48885.2	28644.5	60831.3	23721.8	75667.2	20517.9	59295.6	21239.9	12903.7	43011.5	57743.2	38081.1	62315.1
M311T671	[M-H]-	1,3,6-trihydroxy-2-(3-methylbut-2-enyl)xanthen-9-one	0.30354	1.09303	0.679518	311.116	670.835	1.76699			Organoheterocyclic compounds	Benzopyrans	1-benzopyrans	700.369	10	10	23440.1	22055.2	27804.1	20214.4	21046.2	14319.4	52492.1	22216.7	13646.2	70740.8	19275.2	14730.8	5931.47	50755.8	21970.7	54409.6	59612.4	51912.3	40132.9	49426.8	23885.9	35019.1	18275.9	18302	53778.6	22963.4	26877.5	77500.8	40090.6	45967	47460.5	30709.5	40044.9
M483T63	[M-H-C7H4O4]-	1,3,6-tri-o-galloyl-.beta.-d-glucose	0.579044	0.744587	0.459516	483.097	62.596	2.92241		C17458				75.421	7	4	5299.6	8812.59	5347.67	14378	16888.9	5975.27	23274.2	4438.16	7704.99	11056.7	5755.09	13373.3	13703.2	18080.6	41536.1	8500.66	14992.9	13067.1	3165.94	14051.1	2500.91	15552.4	13133.2	14088.3	11052.2	6109.59	8123.37	3841.76	11799.3	12456	17924	13802.5	13381.1
M299T59_4	[M-H]1-	13-hydroxy-9z,11e-octadecadienoic acid	4.89928	0.803599	0.546432	299.259	59.016	1.27062	HMDB0112194		Lipids and lipid-like molecules	Fatty Acyls	Lineolic acids and derivatives	60.79	10	10	740436	1.91633e+06	1.39026e+06	848438	4.74012e+06	769609	1.2487e+06	1.54241e+06	5.91221e+06	4.21181e+06	1.7449e+06	5.70766e+06	5.50866e+06	1.53845e+06	2.58952e+06	967419	1.05211e+06	725310	2.44159e+06	1.26962e+06	1.07296e+06	891263	831442	1.69663e+06	743552	8.59437e+06	1.77185e+06	979543	1.28191e+06	1.12599e+06	6.00325e+06	1.57718e+06	1.20665e+06
M293T53_2	[M-H-H2O]-	13s-hydroperoxy-9z,11e-octadecadienoic acid	8.49159	1.36916	0.167544	293.212	53.306	1.03164		C04717	Lipids and lipid-like molecules	Fatty Acyls	Lineolic acids and derivatives	54.343	10	10	1.85223e+06	1.41359e+06	4.47641e+06	5.31513e+06	2.48897e+06	7.6911e+06	3.94927e+06	8.80015e+06	1.38127e+06	7.19394e+06	9.90213e+06	3.36913e+06	6.39549e+06	5.35872e+06	5.12395e+06	4.65308e+06	8.17086e+06	6.93552e+06	7.47811e+06	4.70965e+06	4.6201e+06	6.44451e+06	7.41736e+06	5.85074e+06	3.22706e+06	3.8098e+06	6.66882e+06	5.30982e+06	3.95648e+06	4.01593e+06	8.45958e+06	5.60786e+06	9.43303e+06
M477T297	[M-H]-	1,4-bis[(p-hydroxyphenethyl)amino]anthraquinone	0.0214879	0.803403	0.418195	477.199	296.621	1.68443			Benzenoids	Anthracenes	Anthraquinones	304.458	9	10	4025.11	5141.27	3076.46	8127.08	6355.35	16114.4	5043.8	8379.06	23244	7282.64	6099.24	7677.75	3679.53	5258.11	7573.66	6234.29	5883.48	8139.64	4592.58	11038.5	8952.05	4115.25	5973.17	4271.97	10141.2	2852.4	1689.96	17459.9	6635.93	4311.15	8490.63	5913.12	6981.22
M341T92	[M+C2H3O2]-	1,4-d-xylobiose	1.57972	0.974376	0.936411	341.084	91.711	0.225947		C01630	Organic oxygen compounds	Organooxygen compounds	Carbohydrates and carbohydrate conjugates	106.178	10	10	177094	168399	54689.3	346320	200251	282769	194089	266968	45798.6	149706	377548	202766	114562	582776	479707	169649	241823	304645	214224	813275	157803	152542	201304	114877	558857	99409.3	52356.6	188342	118818	151154	219836	254289	193508
M327T324	[2M-H]-	1,5-anhydro-d-sorbitol	0.0588803	1.00074	0.996853	327.13	324.378	1.9798	HMDB0002712	C07326	Organic oxygen compounds	Organooxygen compounds	Carbohydrates and carbohydrate conjugates	330.153	9	10	11769.5	10056.6	15078.9	13867.9	14401.1	20904.7	11339.8	9917.24	16065.9	17714.2	13915.2	10232	10864.5	16662	16559.5	16516.6	7991.05	5981.49	9246.68	12751	14345	8603.24	13945.2	12358.8	9657.16	9224.72	9651.09	7601.28	10404.5	10187.4	11495.7	14288.6	8133.75
M365T36	[M-H]-	15-cyclohexylpentanorprostaglandin f2.alpha.	2.53363	1.46216	0.409205	365.237	36.4885	0.104347			Lipids and lipid-like molecules	Fatty Acyls	Eicosanoids	48.471	10	10	828950	1.69015e+06	39937.6	342135	204138	375725	529833	689252	242568	544050	881592	1.0498e+06	2.15646e+06	110634	313736	1.47802e+06	835816	190104	406274	87081	575676	159454	277949	955520	49741.6	1.70521e+06	229049	304997	1.32865e+06	1.19734e+06	1.59057e+06	271391	331945
M363T215	[M-H-H2O]-	16,16-dimethylprostaglandin f2.alpha.	0.110556	0.878695	0.380506	363.239	215.049	2.69935			Lipids and lipid-like molecules	Fatty Acyls	Eicosanoids	220.557	10	10	20181	16415.9	20269.2	16164.9	33477.9	18705.9	12589.3	20417.8	10076.9	24574.3	20360.7	13785.5	16603.6	25428.4	20530.5	15770.9	14707.6	29600.2	15316.6	28089.9	19340.8	15671.9	19255.8	14432.6	26721.9	16708.1	24732.6	14973.4	10707.9	14296.1	23133.6	23608.5	13010.7
M271T56	[M-H]-	16-hydroxyhexadecanoic acid	4.06789	1.17943	0.669712	271.228	55.765	0.645525	HMDB0006294	C18218	Lipids and lipid-like molecules	Fatty Acyls	Fatty acids and conjugates	63.77	6	6	1.70937e+06	1.77265e+06	2.02355e+06	249453	1.38461e+06	405361	1.0741e+06	288651	2.36748e+06	548346	469009	882061	863294	381770	739611	430839	328648	325788	558934	561909	297870	511576	481341	452492	515804	1.46732e+06	1.06247e+06	469206	595552	375435	963261	412693	423124
M405T98	[M-H]-	17.beta.-carboxy-17.alpha.-formyloxydexamethasone	0.842592	1.15043	0.644859	405.159	97.636	2.68412			Lipids and lipid-like molecules	Steroids and steroid derivatives	Steroid esters	113.075	9	7	87951.7	97139.3	102046	208719	50368.8	119939	106444	285046	84786.7	366233	166692	205038	268312	125521	562084	247301	364398	178029	294410	347132	117199	228941	289406	298687	294666	263852	172236	232007	244820	120825	291740	119113	346994
M385T165	[M-H-H2O]-	17-phenoxytrinorprostaglandin f2.alpha.	0.379835	0.752187	0.346486	385.178	164.968	1.45679			Lipids and lipid-like molecules	Fatty Acyls	Eicosanoids	178.893	7	4	15043.1	10595.4	25266.8	9089.81	8175.29	8420.87	13076.7	12127.1	12339.7	8765.33	10100.4	4911.6	34325.5	38215.1	35226.2	13925.8	48475.7	34023.2	4950.95	6380.43	41438.3	4858.85	7063.07	10660.6	3103.5	6408.43	13650.4	31700.3	21640.3	45685.3	8703.34	33598	29651.9
M351T233	[M-H-H2O]-	17-phenyltrinor-13,14-dihydroprostaglandin a2	0.170355	1.15191	0.703508	351.182	233.215	1.11318			Lipids and lipid-like molecules	Fatty Acyls	Eicosanoids	238.38	8	9	15472.2	18673	16585.9	11679.4	21705.6	18527.8	9518.06	7276.36	7031.95	14895.2	10583.5	27662.9	14754.6	13475	38125.1	6388.5	14169.8	21955.4	18059.3	26668	7810.42	17640.7	11817.1	7775.44	23673.2	73141.3	19249.4	19261.2	8072.85	12184	22133	19185.1	9104.13
M365T381	[M-H-H2O]-	17-phenyltrinor-8-iso-prostaglandin e2	0.0784614	1.14401	0.696425	365.157	380.62	1.96502			Lipids and lipid-like molecules	Fatty Acyls	Eicosanoids	383.142	6	8	15052.5	4112.6	11637.7	1066.85	6864.92	2973.26	3978.01	1033.5	1766.75	1699.27	3761.11	3886.78	8087.17	1754.02	5006.02	1589.78	2702.3	1670.62	1115.44	2016.34	4466.63	1417.48	2894.65	1150.91	1787.01	2018.64	2943.53	666.044	1229.25	3780.19	1576.08	2165.08	2597.12
M469T58	[M-H]-	18.beta.-glycyrrhetinic acid	0.639728	1.30904	0.423934	469.332	58.472	2.85714			Lipids and lipid-like molecules	Prenol lipids	Triterpenoids	65.307	8	9	42184	136436	144792	21256.3	53021.2	27446.3	29807.9	41729.6	39679.4	42190.3	44417.6	54355.4	115754	24093.2	22498.8	11836.7	38875	26635.2	33223.9	56791.4	27751.6	67388.4	24789.5	17914.5	51430.4	39796.8	67481	26610.2	23747.5	23161.7	42531.3	53980.8	31353.9
M317T339	[M-H]1-	18-hydroxy-5z,8z,11z,14z,16e-eicosapentaenoic acid	0.401789	0.779361	0.244093	317.197	338.603	0.526323			Lipids and lipid-like molecules	Fatty Acyls	Eicosanoids	345.143	10	10	49524.9	32474.2	11200.8	9450.7	18510.3	9412.2	12927.1	13659.8	40540	13220.7	13081.5	28090.1	19703.3	11780.6	14228.5	11053.2	11144.4	11367.4	14315.3	14059.9	13297.3	10541.5	9376.91	13741.4	12754.9	17410.7	14858.1	9664.54	15323	11759.6	19391.7	20527.9	9128.59
M361T279	[M-H]-	19,20-dihydroxy-4z,7z,10z,13z,16z-docosapentaenoic acid	1.05801	0.848362	0.372018	361.223	279.175	0.443389	HMDB0010214		Lipids and lipid-like molecules	Fatty Acyls	Fatty acids and conjugates	282.071	10	10	213756	378665	278461	206262	270508	132664	109243	113884	286748	267892	115285	250182	287112	133383	150188	108730	135345	152334	127114	213008	108295	253348	91478.4	72568.5	351618	129592	182544	119395	133542	117490	145220	272809	75388.5
M503T175	[M+CH3COOH-H]-	(19r)-9-acetyl-19-hydroxy-10,14-dimethyl-20-oxopentacyclo[11.8.0.0<2,10>.0<4,9 >.0<14,19>]henicos-17-yl acetate	0.874475	0.978586	0.955973	503.302	175.116	8.56027			Lipids and lipid-like molecules	Steroids and steroid derivatives	Steroid esters	188.077	10	10	75774.5	286966	50575.9	32987.7	189758	33122.8	100220	41397.2	61134	65860.1	25174.5	87060.9	54866.6	39660	59673.9	28039.5	22136.9	25044.4	22521.5	76226.8	51323.7	91015	34901.9	37280.9	44685.4	82055.8	48915.2	18810.4	34234.4	52830.8	64711.8	68608.3	19282.2
M476T203	[M]-	1-(9z,12z-octadecadienoyl)-2-hydroxy-sn-glycero-3-phosphoethanolamine	1.25435	1.14478	0.605459	476.278	202.909	1.22906			Lipids and lipid-like molecules	Fatty Acyls	Lineolic acids and derivatives	208.668	9	10	103013	84634.8	136731	272903	102286	222150	183027	240853	37140.8	243747	228839	169388	155034	200682	98699.1	191601	364720	464239	213047	227686	328533	204807	168060	305019	468355	157531	184167	286644	163020	295975	170503	130877	231751
M363T267	[M-H-H2O]-	1a,1b-dihomoprostaglandin e1	0.305285	0.781268	0.0458153	363.239	266.572	3.05152			Lipids and lipid-like molecules	Fatty Acyls	Eicosanoids	268.21	7	8	13758	20040.5	18396.1	9508.71	24458.8	10476.9	12871.6	15711.8	23574.3	12524.9	21357.3	9202.51	21716.1	14854.9	17540.6	16976.1	13820.2	14135.3	16941.3	24578.8	7494.01	16808.1	12493.4	11821.2	20982.3	17468.2	19875.5	8803.83	18618.7	8635.09	20239.3	19386.6	6617.22
M429T72	[M-H]-	(1-acetyloxy-3-hydroxy-6,8a-dimethyl-7-oxo-3-propan-2-yl-2,3a,4,8-tetrahydro-1h-azulen-4-yl) 4-hydroxybenzoate	0.473456	0.816711	0.263905	429.195	72.027	0.0709432			Lipids and lipid-like molecules	Prenol lipids	Sesquiterpenoids	97.28	6	9	64707	101272	50008.4	131251	60414.5	87533.5	145836	121643	106213	152661	140560	194761	250490	81594.9	106503	114892	103958	91763.1	202369	90968.9	174172	92251.9	73459.1	91479.4	72076.8	138381	44471.2	105095	141122	215425	214218	97449.2	73986.6
M481T145	[M-H]-	1.alpha.-methyl-5.alpha.-androstan-3.alpha.,17.beta.-diol glucuronide	1.16707	1.07488	0.784871	481.293	144.976	3.46521						153.116	10	10	195980	225347	127934	262727	221754	318074	270133	425927	111315	262489	430987	214184	287079	718254	427205	368531	632466	670753	207509	652139	366436	247980	178128	313052	685761	326698	220550	198449	250259	287724	386492	217133	227047
M461T27	[M-H-H2O]-	1.alpha.-methyl-5.alpha.-androstan-3.alpha.-ol-17-one glucuronide	0.641303	0.887089	0.443047	461.273	26.731	0.138755						40.028	10	10	90635.5	363081	127368	247095	269216	180088	238643	179038	203030	227662	257114	375920	345743	155396	67924.6	164374	224400	232851	348299	134430	297270	345263	152079	160670	153521	245663	162055	221452	253725	287071	410613	326703	219314
M470T322	[M+C2H3O2]-	1-decanoyl-2-hydroxy-sn-glycero-3-phosphocholine	0.0112288	0.906887	0.542699	470.228	322.353	3.96279			Lipids and lipid-like molecules	Glycerophospholipids	Glycerophosphocholines	336.999	7	5	2331.21	4068.09	2773.04	5167	3354.01	5608.08	4259.34	5417.16	3059.5	5584.61	3944.9	5416.62	7076.79	4071.04	5606.2	2738.58	3777.62	4615.78	3526.46	4763.06	4945.2	5658.11	4658.27	4150.24	4463.55	8647.66	2605.39	5456.42	6227.27	5372.08	9691.65	4991.69	2355.05
M213T347	[M-H]-	1-Deoxy-D-xylulose 5-phosphate	0.0561027	0.992344	0.966049	213.018	347.326	1.15619	HMDB0001213	C11437				350.682	10	9	911.511	1237.53	2932.88	1836.17	2883.84	3526.43	1998.69	2849.23	2336.94	3785.13	2935.04	5594.49	4725.91	5918.58	2389.26	2189.05	2695.39	1495.79	2554.68	2994.36	1560.82	3180.24	1645.65	2647.12	2071.4	2628.27	956.372	2922.44	2680.18	3239.52	2885.7	1832.42	4249.14
M293T33	[M-H]-	(1e,4e)-1,5-bis(4-methoxyphenyl)penta-1,4-dien-3-one	0.718112	0.723907	0.168386	293.106	33.186	0.951154			Benzenoids	Phenol ethers	Anisoles	50.105	10	10	24580.7	66516.4	33183.5	203427	43580.5	185071	112583	132532	300472	104047	164013	148938	234973	268598	109043	121773	180262	267573	158504	90352.4	214471	175580	102423	138052	299510	146954	37187	149929	225977	314126	189396	155320	121682
M792T102	[2M-H]-	1-hexadecyl lysophosphatidic acid	0.345968	1.12341	0.513022	791.534	102.478	4.27741	HMDB0062325		Lipids and lipid-like molecules	Glycerophospholipids	Glycerophosphates	113.274	8	7	66597	37558.6	51276.5	48840.9	43574.2	61663.4	48068.2	41575.2	21506.7	62707.9	73162.5	38943.5	23133	51740.7	65986.7	31356.4	39381.1	30408.9	21019.7	60899.7	37030.8	63727	31686	29979.6	41030.5	27807.6	61701.6	55753.7	22526	37016.6	33910.9	42453.1	34659.6
M394T226	[M-H]-	1h-indazole-1-pentanoic acid, 3-[(tricyclo[3.3.1.1(3,7)]dec-1-ylamino)carbonyl]-	0.194393	1.08271	0.664951	394.223	226.064	1.5517			Organoheterocyclic compounds	Benzopyrazoles	Indazoles	230.016	10	10	8578.4	11496.8	5229.64	10401.9	7994.03	18055.5	11856.6	15765.9	3039.26	16403.4	12946.6	12328.5	7307.48	10418.6	11846.8	5553.07	11578.6	9030.05	9248.76	7030.01	12057.2	7295.28	9796.61	8295.19	6936.15	11349.2	5532.52	12082.8	9997.67	9652.75	13788.8	19051.8	10748.7
M681T227	[2M-H]-	1h-indole-1-pentanoic acid, 3-[(2,2,3,3-tetramethylcyclopropyl)carbonyl]-	0.480582	1.2819	0.640179	681.369	227.029	2.58527			Organoheterocyclic compounds	Indoles and derivatives	Indolyl carboxylic acids and derivatives	231.286	9	9	17335	50376.9	79324.3	9016.95	31738.3	4575.75	4766.9	5956.43	4635.76	17115	2479.64	11307.9	12769	9422.7	5503.04	2361.08	3927.61	6131.5	3271.37	20313.1	4970.24	14407.7	3540.46	5844.04	33318.5	5141.48	23819.8	5371.6	3321.05	13006.2	8898.98	49211.2	5242.04
M522T216	[M-H]-	1h-indole-3,5-dicarboxylic acid, 1-[3-[4-(decyloxy)phenoxy]-2-oxopropyl]-, 3-methyl ester	0.0640251	0.824503	0.473651	522.24	216.406	1.03775			Organoheterocyclic compounds	Indoles and derivatives	Indolecarboxylic acids and derivatives	231.012	9	8	2873.06	4949.05	9334.12	8642.71	18101.7	14137	4212.84	5575.58	2987.28	8204.07	8475.71	5940.91	4280.9	8040.02	1729.28	4099.14	5855.17	3432.14	7238.87	6333.84	4918.81	10139.3	1213.01	3813.41	15933.3	3445.62	10463	11684.1	3531.55	13453.9	5344.05	11670.6	2484.86
M188T107	[M-H]-	1h-indole-3-propanoic acid	0.83727	1.44577	0.638671	188.072	106.722	2.94159	HMDB0002302		Organoheterocyclic compounds	Indoles and derivatives	Indolyl carboxylic acids and derivatives	120.029	10	10	106447	30488.6	40055.7	26960.3	51776.8	34681.3	32534.4	18605.5	54515.7	35422.5	103888	48207.1	48354.3	199525	125280	27467.8	53750.6	42542.2	25737.7	96546.5	27713	43597.6	36152.8	25007.8	85215.1	17969.6	71164.1	26604.4	27624.2	41851.3	45344.4	38957	67099.8
M347T36	[M-H-CO2]-	1h-pyrano[3',4':6,7]indolizino[1,2-b]quinoline-3,14(4h,12h)-dione, 4,11-diethyl-4,9-dihydroxy-, (4s)-	0.352225	0.87667	0.541543	347.117	35.786	1.4175	HMDB0060510	C11173				38.072	7	6	26429	3861.3	25397.2	31760.5	25865.3	90854.1	18260.4	43868.1	27509.8	40189.7	42167.2	50136.1	81611.9	42925.9	40587.7	39979.4	55698.2	37206.7	89822.9	45770.8	26802.5	82386.3	35255.7	53554.3	51355.8	45444.4	39148.1	51438.9	40339.1	39018	53469.9	54595.1	29566
M403T105	[M-H]-	1-o-(9z-octadecenyl)-sn-glycero-2,3-cyclic-phosphate	1.82627	0.577637	0.128131	403.249	104.669	0.865282						112.976	10	10	1.65359e+06	231954	784094	155439	1.14672e+06	101150	261557	256249	637262	267851	120675	448123	222381	414258	771485	90884.7	88929.3	211443	103794	770149	220976	136335	403028	102484	90051.3	97207.2	1.36503e+06	81699.8	107929	86337.2	229222	271706	105011
M584T249	[M+HCO2]-	1-o-hexadecyl-2-deoxy-2-thio-s-acetyl-sn-glyceryl-3-phosphorylcholine	0.208943	0.733916	0.311961	584.32	249.081	0.352849			Organic nitrogen compounds	Organonitrogen compounds	Quaternary ammonium salts	250.814	7	9	7979.68	10907	9615.4	12571.2	10784.6	9168.59	10149.8	4828.9	28227.6	9801.03	11430.4	8358.6	6224.03	7339.24	23556	3726.77	6649.43	3609.57	8024.75	6922.49	6461.15	7650.33	10589.3	12589.2	5009.83	3603.53	4043.31	16358.7	3233.63	6340.24	5644.38	11393.1	6155.31
M509T158	[M-H]-	1-oleoyl-2-hydroxy-sn-glycero-3-phospho-(1'-rac-glycerol)	1.90478	0.873981	0.721569	509.288	157.894	2.02679			Lipids and lipid-like molecules	Glycerophospholipids	Glycerophosphoglycerols	177.403	10	10	1.00558e+06	847407	285126	1.00423e+06	527374	1.38445e+06	782360	2.07544e+06	363297	1.29824e+06	2.27677e+06	911347	2.398e+06	2.64317e+06	603266	1.09814e+06	1.91367e+06	2.99553e+06	1.56739e+06	2.02727e+06	2.27117e+06	1.46164e+06	692792	1.17713e+06	2.7806e+06	2.33509e+06	658200	1.03871e+06	1.34182e+06	2.24977e+06	3.07111e+06	1.00962e+06	836049
M417T56	[M-H-H2O]-	1-oleoyl-l-.alpha.-lysophosphatidic acid	0.507545	1.12115	0.450753	417.241	55.6475	1.89329			Lipids and lipid-like molecules	Glycerophospholipids	Glycerophosphates	66.322	9	8	37108	19946	15807.7	37236.4	29064.4	45227.7	45589.5	38930.7	10268	48083.2	43890	108139	25031.1	31034.8	25291.3	32602.6	33213	34403.1	37608.4	41401.2	22589.7	40795	15489.1	37333.1	48341.6	28321.1	30362.9	32991.3	54577.4	39132.7	29959.9	23134.2	34194
M471T215	[M+HCO2]-	1-o-octyl-2-o-(n-methylcarbamoyl)-sn-glyceryl-3-phosphorylcholine	1.02646	0.824587	0.479154	471.243	215.185	0.800502			Lipids and lipid-like molecules	Glycerophospholipids	Glycerophosphocholines	228.971	10	10	63099.2	447711	102996	575497	239860	272778	503877	92320.6	405524	754918	374647	684519	498817	62350.2	157475	426467	78364.1	33163.9	622692	39047.6	642680	1.11411e+06	84052.4	157057	35408.2	217137	29995.5	440213	196905	937125	1.01204e+06	315892	75152.4
M817T48	[M+Cl]-	1-palmitoyl-2-arachidonoyl-sn-glycero-3-phosphocholine	0.196419	1.00449	0.983506	816.534	47.855	0.496753	HMDB0007982		Lipids and lipid-like molecules	Glycerophospholipids	Glycerophosphocholines	54.031	8	10	27392.1	18997.4	17336.2	51845.5	20376.7	49894.7	59479.7	48118.1	66469.8	59142.9	40054.4	58324.8	61155	43812.8	62393.6	36124.5	52064.5	49706.9	45201.3	32443	47480.7	51598.7	20309.7	39185.6	57785.5	107205	18182.1	47150.5	39036.1	48110.9	41630.6	43879.3	40803.2
M783T209	[M-H]-	1-palmitoyl-2-arachidonoyl-sn-glycero-3-phosphoserine	0.112084	0.808163	0.272905	782.521	209.472	1.19329	HMDB0012361		Lipids and lipid-like molecules	Glycerophospholipids	Glycerophosphoserines	215.137	7	5	7457.15	4263.55	2688.12	4762.94	2272.07	1107.53	5009.65	4135.69	7229.66	2886.57	2570.07	4483.24	4372.42	2899.95	4185.17	2152.46	1549.52	3920.22	1312.83	3827.86	5793.89	3050.1	2449.45	3737.15	3576.05	3427.22	4563.68	3723.6	4437.61	2561.85	2429.15	3192	1729.92
M483T35_1	[M-H]-	1-palmitoyl-2-hydroxy-sn-glycero-3-phospho-(1'-rac-glycerol)	0.492789	0.894131	0.671544	483.278	35.373	2.61595			Lipids and lipid-like molecules	Glycerophospholipids	Glycerophosphoglycerols	47.204	10	10	234629	474578	198694	772112	301705	485911	753197	843190	95192.4	720362	649049	874858	1.48902e+06	414513	456088	517928	524039	429766	1.00224e+06	390519	948508	692493	102648	509318	419521	794238	248878	713659	968717	969532	1.14718e+06	599783	456473
M723T55	[M+HCO2]-	1-palmitoyl-2-lauroyl-sn-glycero-3-phosphorylcholine	0.777262	0.861422	0.7867	722.506	54.579	1.43379			Lipids and lipid-like molecules	Glycerophospholipids	Glycerophosphocholines	65.97	10	6	62463.1	276923	26724.8	47955.1	24135.3	34022.2	382189	496173	540792	53216.3	55246.5	81238.3	138136	32214.5	80960.9	139339	51857.9	26698.7	49349.9	35927.1	155244	29466.3	31189.9	67973.1	28118	93044.1	29646.1	50817.3	181989	148887	94158.5	30217.3	41897
M746T51	[M-H]-	1-palmitoyl-2-linoleoyl-sn-glycero-3-phospho-(1'-rac-glycerol)	0.763919	1.15455	0.273677	745.504	50.503	1.68755			Lipids and lipid-like molecules	Glycerophospholipids	Glycerophosphoglycerols	59.493	10	8	83090.7	44318.4	65293.5	71996.1	57731.6	72367.5	130179	84593.5	26123.6	101142	80867.1	36889.9	43762.4	88352.6	61482.2	74987.7	77804.2	84497.6	55972.8	88727.4	78611.1	91303.4	30717.2	70153.7	117448	68944.5	89239.4	77653.4	62155.8	47110.8	58351.4	57762.8	62657.2
M748T36	[M-H]-	1-palmitoyl-2-oleoyl-phosphatidylglycerol	0.928603	1.20126	0.659474	747.519	35.682	0.936506			Lipids and lipid-like molecules	Glycerophospholipids	Glycerophosphoglycerols	51.221	10	9	278178	249307	657067	425872	580293	550179	218638	311932	73289.3	260803	854303	64623.4	205628	1.69991e+06	237452	236458	384976	530974	271327	976770	363755	373213	179948	170312	2.02142e+06	366214	602341	271137	179677	529674	381159	338460	199699
M391T27_2	[M-H]-	1-piperazineacetic acid, 4-(phenylmethyl)-, 2-[[2-hydroxy-3-(2-propen-1-yl)phenyl]methylene]hydrazide	1.80108	1.4363	0.347464	391.215	27.427	0.905159			Organoheterocyclic compounds	Diazinanes	Piperazines	34.025	9	10	34462.8	44157.2	52097.7	170828	56274	593185	123988	407354	40605.7	137367	295538	89796.2	89075.9	112580	107733	194078	287581	151851	121394	108507	453616	210724	319981	320345	83288.7	155346	82145.7	388935	347885	317188	324253	134692	204425
M811T209	[M-H]-	1-stearoyl-2-arachidonoyl-sn-glycero-3-phosphoserine	0.150975	0.958132	0.86635	810.549	208.581	7.60442	HMDB0012383		Lipids and lipid-like molecules	Glycerophospholipids	Glycerophosphoserines	214.387	6	7	14081.8	5090.19	3746.95	2654.93	3144.75	3753.35	8613.05	6432.69	11149.6	3472.64	3143.68	1191.84	3411.04	1921.18	5756.05	3299.64	3810.42	3572.37	2601.46	4071.81	4628.99	2575.56	2652.84	2857.79	4105.55	6090.35	4220.72	2013.4	6972.35	2445.7	4625.33	3416.51	2186.37
M480T200	[M-H]-	1-stearoyl-2-hydroxy-sn-glycero-3-phosphoethanolamine	0.971235	0.918669	0.661434	480.309	200.188	3.31976	HMDB0011130		Lipids and lipid-like molecules	Glycerophospholipids	Glycerophosphoethanolamines	205.797	10	10	106135	300617	111129	434102	250364	484723	457032	367457	287996	491493	631699	562255	270155	337892	324397	269514	400828	474310	867484	402517	340797	593825	237373	283173	427010	228575	167285	475821	237178	421334	307623	384862	385063
M389T30	[M-H]-	20-trifluoroleukotriene b4	3.46854	1.27164	0.576702	389.2	30.347	2.73635			Lipids and lipid-like molecules	Fatty Acyls	Eicosanoids	32.919	10	10	81489.4	101005	133361	609070	86054.1	2.56034e+06	524258	1.35386e+06	103683	663781	1.2086e+06	301257	365667	484988	442293	1.03836e+06	1.33169e+06	652229	490179	395743	1.8369e+06	832513	1.13013e+06	1.69323e+06	437851	351088	279242	1.75882e+06	1.5681e+06	1.36851e+06	902240	715965	1.24696e+06
M401T33	[M-H]-	22beta-Hydroxycholesterol	0.737031	1.03013	0.885148	401.341	33.07	4.17283		C05502	Lipids and lipid-like molecules	Steroids and steroid derivatives	Bile acids, alcohols and derivatives	43.184	8	7	127386	187059	299708	104548	254703	122945	80181.3	83077.8	227160	154749	101616	74034.8	77918.6	149194	98740.5	83032.6	95239.2	102511	135440	133315	125841	195034	135206	75721.3	230417	65248.7	233957	145240	88831	110691	98238.1	105908	143991
M159T79	[M-H]-	2,2-dimethylglutaric acid	0.109982	0.910586	0.719498	159.066	79.281	2.47598	HMDB0061676		Lipids and lipid-like molecules	Fatty Acyls	Fatty acids and conjugates	100.161	10	10	125509	19774.3	93497.1	33662.5	95389.5	28251.9	20036.2	32467.6	28327.4	29663.1	22248.4	18902.1	11724.1	38465.2	56560.8	31130.2	24975.6	29893.7	28757.9	41651.5	29579.5	29498.2	17730.8	25351.8	55970.7	26917.9	57300.4	49419.4	23846.5	31305.2	23831.4	45508.3	21651.7
M213T19	[M-H]-	2,4-dihydroxybenzophenone	0.270947	1.18617	0.0675801	213.056	19.4595	1.39265		C14215	Benzenoids	Benzene and substituted derivatives	Benzophenones	21.762	7	10	5315.43	4355.93	5027.51	7314.18	4529.16	7357.86	5018.65	8319.17	4113.75	7676.04	7021.84	4780.84	6109.04	6280.25	5609.53	5280.85	6744.85	5809.13	7280.24	6524.37	7040.88	8646.98	4358.2	4786.03	6337.42	6563.16	6064.17	5020.88	5555.62	6647	7276.09	5362.29	7190.48
M555T153	[2M-H]-	2,5,7,8-tetramethyl-2-(.beta.-carboxyethyl)-6-hydroxychroman	1.41782	0.658894	0.208871	555.274	152.897	1.93377			Organoheterocyclic compounds	Benzopyrans	1-benzopyrans	161.986	10	10	20033.1	282791	11456.8	241775	174681	114868	448734	132744	76693.8	495370	243131	1.49967e+06	427360	118146	172664	108510	128576	120827	406508	219974	209471	418547	71260.7	90699	106879	101865	45180.8	100001	115687	165811	381000	403350	131739
M628T311	[M+Cl]-	2-(5-oxovaleryl)phosphatidylcholine	0.0796608	0.667414	0.310617	628.331	310.589	6.06066e-05			Lipids and lipid-like molecules	Glycerophospholipids	Glycerophosphocholines	333.076	8	6	2340.22	2519.55	2990.13	1294.72	5811.85	5119.27	2595.03	5057.88	1732.48	4038.07	3200.86	3125.18	2673.39	3494.6	3990.43	2356.24	2871.2	6765.34	5002.29	6649.1	3777.71	2189.32	1480.03	3170.57	5515.51	2841.19	2968.27	6587.51	3020.94	4316.26	7711.25	4300.14	2132.17
M220T669	[M-H-CH3]-	2,6-di-tert-butyl-4-methoxyphenol	0.0311467	0.96451	0.900009	220.147	668.894	2.46954			Benzenoids	Phenols	Methoxyphenols	695.869	8	9	3164.19	4165.4	5420.22	3191.34	2028.69	1534.98	3588.13	5062	5695.47	4109.33	5388.04	4935.85	4431.08	14495.3	1984.68	5935.65	4618.44	2692.02	4556.92	4609.02	3756.66	4074.11	3761.42	2102.27	5326.09	8609.18	7652.46	26339.8	2686.48	3245.73	4584.86	4868.94	4933.61
M202T309	[M-H]-	2,8-quinolinediol	0.230544	1.01187	0.942846	202.072	309.343	2.86053			Organoheterocyclic compounds	Quinolines and derivatives	Quinolones and derivatives	315.714	10	10	49076	43746.8	38159.9	53662.1	95185.4	52568.2	29756.5	54607.4	31269.5	38488	31503	55139.6	31754	53248.7	56757.7	38128.3	34227.4	53939	22928.4	85476.5	31492.3	31728.8	61436.6	31001.7	82348.8	36324.6	33083.2	40529.4	24420.2	31581.5	35761.7	43275.4	27455.7
M245T28	[M-H]-	2'-chloro-2-hydroxy-5-methylbenzophenone	1.21428	0.810885	0.631339	245.049	28.194	1.47468			Benzenoids	Benzene and substituted derivatives	Benzophenones	30.83	10	10	42487.2	14358.8	16056.2	136676	20496.5	312126	441496	187522	90090.1	515159	509325	323929	1.17666e+06	339887	233568	563206	778309	158661	961182	341080	643502	427102	670197	908762	117239	727548	21020.5	681149	693891	431785	1.01765e+06	230316	269216
M527T171_2	[2M-H]-	2-cis-4-trans-abscisic acid	0.835741	0.998129	0.994172	527.269	171.289	0.20798		C06082	Lipids and lipid-like molecules	Prenol lipids	Sesquiterpenoids	184.182	10	10	332854	537270	182240	1.18944e+06	212834	518100	1.00121e+06	1.20655e+06	776861	1.12665e+06	807304	1.12495e+06	1.51071e+06	519846	758885	603991	1.17496e+06	1.31478e+06	1.46602e+06	668090	2.21193e+06	1.03473e+06	519985	959265	634228	1.83549e+06	198631	1.33241e+06	1.20874e+06	1.43723e+06	1.61461e+06	481457	578746
M483T331	[M-H]-	2-despiperidyl-2-(5-carboxypentylamine)repaglinide	0.0504778	0.964333	0.857942	483.257	330.802	1.43767			Organic acids and derivatives	Carboxylic acids and derivatives	Amino acids, peptides, and analogues	338.066	6	5	9412.52	4784.27	4993.81	2477.17	5486.4	8939.42	2534.47	1200.57	6024.39	3608.47	6046.08	6137.5	4258.29	1428.25	3890.2	3866.54	6155.56	4999.62	1678.58	3552.04	7675.74	6468.67	3638.35	5771.79	6474.04	5004.34	4359.7	2488.39	4861.93	7110.06	6281.6	2819.9	2122.3
M601T437	[M+C2F3O2]-	2'-fucosyllactose	0.112607	0.809758	0.263298	601.163	436.511	2.77419			Organic oxygen compounds	Organooxygen compounds	Carbohydrates and carbohydrate conjugates	440.603	7	4	1717	1461.07	3371.84	2559.5	2467.83	1740.58	2673.04	2386.09	2094.77	3799.61	2993.76	3855.5	1063.18	2772.53	5595.52	1155.99	4069.18	2575.01	2103.98	4657.21	3745.34	1850.39	2617.82	4573.54	2848.75	1649.2	2870.42	4679.5	1203.1	6301.23	2806.4	4244.5	4295.25
M117T155	[M-H]-	2-hydroxy-2-methylbutyric acid	1.92077	1.24996	0.54019	117.055	154.864	1.18169	HMDB0001987		Lipids and lipid-like molecules	Fatty Acyls	Fatty acids and conjugates	169.923	10	10	104545	675129	997267	1.59863e+06	798372	231033	879690	948234	222497	429603	713901	654822	56723.8	343671	701576	226481	212468	448416	585701	306297	981162	362847	280618	530282	233647	141984	818717	910881	242791	975664	43655.6	1.85382e+06	481771
M117T262	[M-H]-	2-hydroxy-3-methylbutyric acid	0.483077	0.991871	0.971626	117.055	262.153	0.852094	HMDB0000407		Lipids and lipid-like molecules	Fatty Acyls	Fatty acids and conjugates	264.16	10	10	34318	29984.7	52544.9	49574	28517.9	59817.7	35556	76689	31765.6	29238.6	23374	58471.2	7299.17	75229.1	20549.3	19715.3	64109.8	56627	32082.3	39116.1	64251.7	42268.1	25209.7	16441.7	70521.8	21911.3	29169.7	40074.7	32827.9	32925	24550	82024.9	43271.1
M186T229_1	[M-H]-	2-hydroxy-6-methylquinoline-3-carbaldehyde	0.417526	0.882327	0.864229	186.045	228.511	3.38406			Organoheterocyclic compounds	Quinolines and derivatives	Quinolones and derivatives	238.334	10	6	2749.52	27053.3	2344.78	185616	2452.41	14739.3	177238	41287.9	3145.88	29851.7	61006.1	4404.67	2239.3	10318.3	38409.8	12931.5	8459.19	10253.7	30316.3	3698.15	145616	9781.3	26758	81777.4	2060.73	1749.69	2501.78	231335	4476.55	166021	5354.54	18564.3	23366
M151T37	[M-H]-	2-Hydroxyphenylacetic acid	0.0956614	0.824962	0.36223	151.04	37.2435	1.7772	HMDB0000669	C05852	Benzenoids	Benzene and substituted derivatives	Phenylacetic acids	49.87	4	5	69608.6	66627.4	78451.7	65896.8	129973	52706.2	89052.8	55066	59118.8	44025.5	66875.8	61212.2	36176.2	49760.2	88838	43752.3	45995.3	61952.6	58947.3	56360.6	41467	71204.8	42699	30368.4	61298.5	20510.3	24031.3	54890.8	39653.7	28600.3	29905.7	65503.8	48264.9
M113T345	[M-H-CH2O3]-	2-isopropylmalic acid	0.0715895	1.00053	0.99878	113.072	345.091	0.0732163	HMDB0000402	C02504	Lipids and lipid-like molecules	Fatty Acyls	Fatty acids and conjugates	350.682	8	10	1648.72	604.653	2189.95	2453.84	1259.54	1537.43	933.169	4371.75	3602.26	1709.78	2788.06	1200.47	1308.88	8298.37	2991.48	1975.07	1847.96	2275.06	919.825	5800.28	2823.3	2106.81	1505.82	2457.61	919.013	1818.97	817.921	1288.28	1564.22	1476.84	1105.13	1537.96	1076.84
M129T58_2	[M-H]-	2-ketohexanoic acid	4.43558	1.1566	0.624329	129.055	58.117	4.15545	HMDB0001864	C00902	Organic acids and derivatives	Keto acids and derivatives	Medium-chain keto acids and derivatives	69.66	10	10	1.19293e+06	1.6878e+06	1.94987e+06	4.34128e+06	7.1498e+06	4.55737e+06	794440	4.16434e+06	639284	1.35612e+06	1.331e+06	971269	381302	3.30539e+06	2.97897e+06	1.71561e+06	2.15572e+06	2.85925e+06	1.82641e+06	3.66039e+06	1.91684e+06	3.10772e+06	1.83391e+06	516331	3.81828e+06	751112	1.28222e+06	2.29938e+06	604357	1.75963e+06	901140	2.66977e+06	1.74776e+06
M193T305	[M-H]-	2-keto-l-gulonic acid	0.249907	1.32333	0.24655	193.036	305.421	1.63044		C15673	Organic oxygen compounds	Organooxygen compounds	Carbohydrates and carbohydrate conjugates	307.018	7	5	3155.49	2542.66	4264.48	9574.13	4210.94	8302.71	6951.64	10735.2	3021.28	2879.32	3146.36	3841.5	2391.95	5642.44	9137.38	6041	6561.8	13386.5	3792.03	7217.91	4210.06	2495.57	7831.59	5205.45	4520.75	2335.5	2558.67	13881.1	3490.39	4112.8	2955.35	3097.58	4700.62
M750T37	[M+Cl]-	2-linoleoyl-1-palmitoyl-sn-glycero-3-phosphoethanolamine	0.527717	0.998935	0.995002	750.486	36.944	2.22339	HMDB0008928		Lipids and lipid-like molecules	Glycerophospholipids	Glycerophosphoethanolamines	37.831	4	7	61270.6	82264	59389.2	185137	73919.2	234751	159783	172890	185184	195351	167570	120040	223497	159933	118951	123007	160700	176993	169496	68860	149250	140318	144939	174759	212977	174267	40059.8	160527	159484	158532	120451	129699	172078
M117T240	[M-H]-	2-methyl-3-hydroxybutyric acid	0.107834	0.849446	0.326319	117.055	239.973	0.942433	HMDB0000354		Lipids and lipid-like molecules	Fatty Acyls	Fatty acids and conjugates	241.536	3	5	27834.8	7005.68	11327.5	6435.89	15924.3	7954.25	5048.81	10930.6	12544.8	5829.68	11541.6	7644.71	7665.11	19051.3	9122.42	9238.83	13353	17011.5	6076.52	21970.1	6213.89	6659.09	8419.65	4240.92	23292.7	4832.33	14513	5209.42	4977.45	6062.36	10880.4	13483.2	9389.94
M194T91	[M-H]-	2-(n-morpholino)ethanesulfonic acid	13.208	0.158178	0.273306	194.049	90.975	1.94959			Organoheterocyclic compounds	Oxazinanes	Morpholines	104.618	10	10	1.72875e+06	532288	6.67001e+06	477212	1.00147e+06	126344	648120	233504	3.13964e+06	284713	5.13504e+06	8.96044e+06	123661	868807	3.56765e+06	222753	220983	175219	2.03049e+06	878261	985150	1.74183e+06	822450	95911.3	212458	53573.2	2.98422e+06	178108	154862	656607	6.90949e+06	6.02739e+07	242306
M761T36_1	[M-H]-	2-oleoyl-1-palmitoyl-sn-glycero-3-phosphoserine	0.753466	0.717151	0.393505	760.522	36.083	0.399448	HMDB0012357		Lipids and lipid-like molecules	Glycerophospholipids	Glycerophosphoserines	37.401	8	9	53717.6	198466	58761.1	90258.5	80415.1	110267	206725	284296	574819	96175.1	105118	100652	174198	126402	54927	105984	96037.1	117843	91360.4	177851	115731	79811.9	61829.7	98792.4	172400	88049.4	99228.6	101052	138458	122286	102613	92542.6	97124.9
M190T219	[M-H]-	(2-oxo-2,3-dihydro-1h-indol-3-yl)acetic acid	3.35811	1.0981	0.773692	190.051	218.661	0.0119655	HMDB0035514	C22202	Organoheterocyclic compounds	Indoles and derivatives	Indolyl carboxylic acids and derivatives	224.616	10	10	108022	250385	75845.2	1.78386e+06	236880	2.0751e+06	1.40044e+06	1.23614e+06	501872	1.35227e+06	1.68007e+06	1.00233e+06	500410	1.00183e+06	1.45507e+06	1.77859e+06	2.08244e+06	1.93953e+06	992196	995229	1.65006e+06	682948	1.71886e+06	1.72067e+06	1.05397e+06	246771	147781	1.80004e+06	1.19353e+06	1.0568e+06	1.77182e+06	1.18607e+06	1.27276e+06
M159T217	[M-H]-	2-oxoadipic acid	0.372594	0.89431	0.395435	159.03	217.202	1.86357	HMDB0000225	C00322	Organic acids and derivatives	Keto acids and derivatives	Medium-chain keto acids and derivatives	232.007	10	10	35549.2	27511.7	39063.7	55261.8	33079.4	61104.7	37114.1	52719.4	56803.7	64447.9	81058.9	29231.6	39331.5	48807.3	62519.1	47623.4	52447.8	46562.3	35480	55144	53378.4	29598.2	54315.5	46007.4	44093	27152.8	24710.6	50675.2	36224.2	40739.1	44440.7	61348.8	41753.5
M697T214	[M-H]-	[(2r,3s,4s,5r,6r)-6-[1,7-bis(3,4-dihydroxyphenyl)-5-oxoheptan-3-yl]oxy-3,4,5-trihydroxyoxan-2-yl]methyl (e)-3-(3,4-dimethoxyphenyl)prop-2-enoate	0.135483	1.05419	0.673313	697.236	213.865	4.55087			Phenylpropanoids and polyketides	Diarylheptanoids	Linear diarylheptanoids	217.957	9	9	1571.49	2642.08	2903.03	4861.9	3734.13	5370.31	3187.04	3655.05	2493.05	3025.38	3286.21	3485.18	2435.39	3967.88	3744.91	5141.82	4425.31	5374.68	2411.48	3658.52	3089.14	1847.65	4062.89	2942.79	8214.2	2347.23	2594.62	4822.58	2202.81	3324.82	3817.93	4649.21	2799.75
M593T270	[M-H]-	(2r,3s,4s,5r,6r)-6-[1,7-bis(4-hydroxyphenyl)heptan-3-yloxy]-5-[(2s,3r,4r)-3,4-dihydroxy-4-(hydroxymethyl)oxolan-2-yl]oxy-2-(hydroxymethyl)oxane-3,4-diol	0.0540459	0.929321	0.707872	593.251	270.312	2.5011			Phenylpropanoids and polyketides	Diarylheptanoids	Linear diarylheptanoids	272.382	8	8	3127.49	5967.75	2198.07	3009.69	3453.99	3184.94	2526.99	2863.33	2659.89	3584.51	1885.1	4074.5	2741.08	3908.61	6494.32	2815.67	1743.02	1683.91	715.323	2726.34	3117.16	1679.33	3590.28	2602.64	4065.54	2633.54	1928.1	2928.44	1962.13	2723.73	1817.01	3501.18	1340.48
M235T55	[M-H]-	(2r)-8-ethyl-7-hydroxy-5-methoxy-2-methyl-2,3-dihydrochromen-4-one	0.298791	0.975261	0.78882	235.101	54.928	5.57989			Organoheterocyclic compounds	Benzopyrans	1-benzopyrans	66.602	10	10	129421	116642	126580	96240.2	101499	76750.6	79168.9	77065.2	73665.9	92455.4	94747.5	100396	102957	86888.5	114791	86460	87176.2	81693.9	96243.2	107254	97334.2	86432.8	72875.2	88826.6	45924.5	85617.4	135141	69636.3	80164.5	97160	134780	118222	70547.7
M525T49_2	[M+FA-H]-	(2s,3r,5r,10r,13r,14s,17s)-2,3,14-trihydroxy-10,13-dimethyl-17-[(2r,3r)-2,3,6-trihydroxy-6-methylheptan-2-yl]-2,3,4,5,9,11,12,15,16,17-decahydro-1h-cyclopenta[a]phenanthren-6-one	0.152283	1.00726	0.96848	525.288	49.165	3.73307			Lipids and lipid-like molecules	Steroids and steroid derivatives	Bile acids, alcohols and derivatives	51.078	7	6	58297.4	136092	46169.1	96107.9	84568.1	101533	104095	167960	53303.2	191044	96072.6	136462	122314	67705.2	87841.4	50221.5	129218	72329.5	115944	76174.8	156304	115703	54551.6	81997.3	64486.5	56861.2	41155.1	119706	100843	115250	245006	84117.3	55824.8
M493T144_2	[M-H]-	(2s,3r,5r,10r,13r,14s,17s)-2,3,14-trihydroxy-10,13-dimethyl-17-[(2r,3r,5r)-2,3,6-trihydroxy-5,6-dimethylheptan-2-yl]-2,3,4,5,9,11,12,15,16,17-decahydro-1h-cyclopenta[a]phenanthren-6-one	4.76822	0.938165	0.827557	493.293	144.493	1.6924			Lipids and lipid-like molecules	Steroids and steroid derivatives	Bile acids, alcohols and derivatives	151.756	10	10	1.55679e+06	5.0038e+06	1.71853e+06	3.6568e+06	3.01774e+06	5.47395e+06	4.12685e+06	5.80578e+06	1.59277e+06	4.24215e+06	1.05167e+07	4.55728e+06	3.83628e+06	1.188e+07	6.33493e+06	4.72175e+06	6.58915e+06	7.26699e+06	4.85974e+06	9.60941e+06	7.46261e+06	5.35227e+06	2.25046e+06	3.1025e+06	9.65725e+06	5.26066e+06	3.29401e+06	3.64682e+06	3.78651e+06	5.57467e+06	6.95487e+06	3.93791e+06	3.24198e+06
M506T48	[M-H]-	3,15-dibenzyl-1,4,12-trimethyl-1,4,7,10,13-pentazacyclopentadecane-2,5,8,11,14-pentone	0.239665	1.19933	0.633823	506.259	47.5075	0.895909						66.8	9	8	16075.2	118301	30790.9	30928.4	23647.5	41809.2	30426.2	26325.9	9500.42	24500	66298.2	166890	27314.6	15093	27254.5	4718.43	8065.36	9041.22	92027.6	19442.1	23937.1	32160.7	17754.7	6949.13	10769.8	15865.5	18362.4	26548	24115.6	48552.5	39312.7	84046.4	29391.8
M159T229	[M-H]-	3,3-dimethylglutaric acid	0.179833	0.998411	0.994638	159.066	228.882	2.96491	HMDB0002441		Lipids and lipid-like molecules	Fatty Acyls	Fatty acids and conjugates	232.476	7	7	15943.8	4580.09	7485.23	17372.2	6273.36	8794.11	5029.12	9635.55	6438.42	6788.59	11698.4	5913.96	3301.28	9207.34	10397.2	7900.62	10323.7	7580.47	9170.29	12154.2	8687.31	8208.26	11434.1	7179.95	9417.5	4044.41	6094.62	6734.78	6055.43	7037.79	7745.31	20675.3	7117.91
M181T357	[M-H]-	3,4-dihydroxyhydrocinnamic acid	0.198244	0.7638	0.321589	181.009	357.368	1.6555	HMDB0000423	C10447				361.771	10	10	84801.4	8368.13	31663.7	6645.31	25894.6	9538.59	28105.6	11382	20938.6	16029	36767.2	14099.5	16666.1	17272.5	28392.8	22694.3	7317.73	7896.87	7952.25	24927.1	13985.8	12346.6	28455.9	8455.6	19753.8	12381.6	13069.5	5692.2	8041.4	6431.61	28428.3	7595.53	15514.6
M165T149	[M-H-H2O]-	3,4-dihydroxymandelic acid	0.356664	0.703826	0.09143	165.022	148.873	9.32722	HMDB0001866	C05580	Benzenoids	Phenols	Benzenediols	157.685	10	10	178334	39886.5	32324.9	47144.6	63454.8	45936.8	29373.1	45970	50959.5	46740.5	36812.1	43933.2	99801.4	39612.4	66047.4	40901.8	50071.5	39705	37769.4	27324.2	51001	17137	11595.5	43762.4	31801.9	40711.8	37313.7	42628.7	51870.7	30002.8	106144	36756.2	26962.9
M180T66	[M-H]-	3,4-dihydroxymethamphetamine	0.295996	0.907108	0.671477	180.114	65.97	0.941701			Benzenoids	Benzene and substituted derivatives	Phenethylamines	82.348	10	9	5896.95	6656.3	11893.2	6480.52	6436.74	21995.9	6973.2	17979.9	9819.88	10480.3	17182.2	12001.7	7826.15	13990	21545.8	12181	15014.5	6001.56	5611.83	19701.1	18337.2	4638.75	39694	14779.2	8875.3	5088.45	9161.46	17126.8	11545.4	13729.2	16704.6	19873	24067.5
M203T190	[M-H]-	3,5-dihydroxydecanoic acid	0.132613	0.904286	0.558252	203.129	190.334	0.276447			Organic acids and derivatives	Hydroxy acids and derivatives	Medium-chain hydroxy acids and derivatives	196.088	6	7	34100.6	9745.24	22667.2	15772.4	19029.2	10502.8	17440.3	12834.6	10762.6	12129.3	14233.9	19215	14521.2	22044.4	17783.8	12261.3	14967.9	17556.4	11056.9	27222.5	14679.1	11770.5	14624.3	8260.41	23164.6	8624.61	22268.1	10646.8	7697.82	12693	11945.3	21787.3	11176.4
M255T34_2	[M-H]-	3-(5-phenylthiophen-2-yl)prop-2-ynyl acetate	1.26247	1.71615	0.142755	255.034	34.053	1.22569			Organoheterocyclic compounds	Thiophenes	2,5-disubstituted thiophenes	49.16	10	10	12854.8	251595	40679.9	101797	21284.4	233328	83754.9	107299	38967.9	84918.9	121610	53806.6	114769	100860	95579.4	125887	126841	150091	128708	58495	176260	57843.6	215971	169127	38030.6	83548.7	11536	161608	153994	100908	180083	119325	112211
M539T58_1	[M+Cl]-	3.alpha.,4.beta.-galactotriose	0.317217	0.757399	0.36115	539.124	57.904	3.73131			Organic oxygen compounds	Organooxygen compounds	Carbohydrates and carbohydrate conjugates	67.702	9	8	7649.22	4942.08	8305.09	7415.57	5369.89	4771.57	13795.4	9689.99	3301.65	11304	10078.9	8972.77	8145.95	15236.3	20424.9	11871.1	11401.1	4445.98	4353.21	7006.38	8602.14	11646.1	17395.6	11832.1	7223.96	7536.3	2133.38	3294.85	8651.82	4129.99	9908.2	9335.76	6805.41
M387T89	[M-H-H2O]-	3.alpha.,7.alpha.-dihydroxy-12-oxocholanoic acid	1.54393	0.901457	0.663449	387.254	89.161	0.88357	HMDB0000400		Lipids and lipid-like molecules	Steroids and steroid derivatives	Bile acids, alcohols and derivatives	117.088	10	10	1.24674e+07	5.02189e+06	7.47615e+06	4.08232e+06	5.01876e+06	3.02503e+06	1.75509e+06	3.1322e+06	5.58611e+06	598261	3.26152e+06	1.35278e+06	1.19608e+06	4.93274e+06	6.62545e+06	1.04661e+06	2.9303e+06	4.56785e+06	826575	6.58772e+06	2.90554e+06	1.51792e+06	4.46191e+06	1.04743e+06	9.05805e+06	1.12387e+06	1.41749e+07	1.66134e+06	693990	1.64745e+06	1.35731e+06	3.39243e+06	2.9332e+06
M780T114	[2M-H]-	3.alpha.-hydroxy-7-oxo-5.beta.-cholanic acid	1.82287	0.723688	0.288695	779.549	114.42	0.995793			Lipids and lipid-like molecules	Steroids and steroid derivatives	Bile acids, alcohols and derivatives	130.34	10	10	128903	749667	64412.3	151019	368049	142306	163566	148230	624939	109576	294155	392240	370982	247420	356760	91124.6	245646	289988	118298	459085	368542	137083	209136	151816	339352	187576	145790	126611	139140	128928	211219	493764	251046
M290T305	[M-H-C14H25O11N]-	3'-.alpha.-sialyl-n-acetyllactosamine	0.302218	1.04579	0.777476	290.088	305.342	2.06319			Organic oxygen compounds	Organooxygen compounds	Carbohydrates and carbohydrate conjugates	307.018	6	5	11419.7	9107.84	13064	22327.1	12814.3	30071.8	13181.9	14772.4	17065.4	12343.9	13955.7	12439.3	7241.28	17596.9	17323.6	13598.1	10494.7	15220.5	10174.1	27134	10074.8	9881.9	20003.6	6868.31	21145.8	8440.04	9010.17	15382	10996.1	13480.8	10237.6	14309.1	14209.9
M264T48	[M-H]-	3-amino-2-(4-chlorophenyl)-2-hydroxypropanesulfonic acid	1.19857	0.647948	0.391392	264.001	48.496	0.197649			Benzenoids	Benzene and substituted derivatives	Halobenzenes	50.105	5	6	715682	58948.4	248466	12101.1	155325	153579	211380	161699	34358.5	96585.5	285744	110432	139455	64300.9	824644	59361.3	300112	131958	141248	261432	171018	101607	50959.2	25547.9	11256.9	95813.7	48020.5	211139	154721	46872.7	196938	106535	18223.6
M116T387	[M-H]-	3-aminopentanoic acid	0.517429	0.99257	0.981625	116.072	386.734	2.66101			Organic acids and derivatives	Carboxylic acids and derivatives	Amino acids, peptides, and analogues	389.021	10	10	30811.8	119850	98190.3	270113	64877.1	86643.8	102534	94984.2	48520.3	75108.8	131086	287538	14116.5	118780	43828.5	86046.7	66745.2	103543	170639	108996	91486.8	199529	30917.9	11330.2	131403	10514.9	69634.5	195708	20621.2	182515	36550.8	224011	100611
M108T139	[M-H-CO2]-	3-aminosalicylic acid	0.276789	0.925766	0.674531	108.045	139.378	2.69376	HMDB0001972		Benzenoids	Benzene and substituted derivatives	Benzoic acids and derivatives	146.655	9	9	66922	13487.9	50226.2	24412.1	35343.8	35232	24602.5	30181.7	16749.4	21915.5	23662.8	21783.9	9521.69	43714.4	40111.5	36370.2	16595.8	17852.1	14400.4	35505.7	19029.4	30887.5	14254.1	18144.6	37346.3	12298.4	33910.6	26789.8	17634.5	25635.9	18410.9	38723	28412.9
M431T103_2	[M-H]-	3.beta.,7.alpha.-dihydroxy-5-cholestenoic acid	1.11123	0.742583	0.451347	431.316	102.7	1.15433		C17335	Lipids and lipid-like molecules	Steroids and steroid derivatives	Bile acids, alcohols and derivatives	106.375	9	7	31210.3	62308.1	40926.6	31602	61734.6	41072.2	126040	52503.8	50515.5	194439	102195	200483	75194	76914.6	148704	78305.5	54815.6	25126.4	64054.5	146631	81513.4	77405.4	115054	60614.4	25376.3	57624.7	28464.7	62491.2	57602.5	88024.5	144057	62020.3	45204.3
M236T55	[M-H]-	3-(cyclohexylamino)-2-hydroxy-1-propanesulfonic acid	0.599905	0.988771	0.982834	236.098	55.374	7.75153			Organic nitrogen compounds	Organonitrogen compounds	Cyclohexylamines	71.631	8	9	131987	17282.4	137070	7680.92	18590.6	67206.4	22099.1	57488.5	101049	18453.4	67894	6805.81	10589.7	17596.4	49305.8	17987.9	12259.7	15978.4	10434.8	22168.5	61475.1	8579.37	4896.65	59374.5	50809.6	80158.9	101213	61747.4	60285.2	57191.3	83903	23274.8	6020.54
M405T147_2	[M-H]-	3-dehydrocholic acid	3.83307	0.765739	0.242845	405.264	147.056	1.87512						150.484	10	10	8.35742e+06	5.84776e+06	3.7574e+06	2.47846e+06	6.01808e+06	2.5295e+06	1.48202e+06	2.46761e+06	2.78254e+06	1.75702e+06	2.2096e+06	4.10207e+06	4.24769e+06	3.0267e+06	3.06876e+06	1.66494e+06	1.74286e+06	2.40892e+06	1.80223e+06	3.29476e+06	2.66637e+06	1.27779e+06	2.13673e+06	1.10218e+06	2.54516e+06	1.12144e+06	5.06199e+06	1.81855e+06	1.24139e+06	1.9004e+06	3.21152e+06	5.74875e+06	1.62756e+06
M921T241	[M-H]-	3-(galactosyl(1-2) glucuronyl)-22-ddmp soyasapogenol b	0.0315828	0.896471	0.587899	921.488	241.466	0.222383			Lipids and lipid-like molecules	Prenol lipids	Terpene glycosides	243.293	6	6	1965.41	2846.46	1180.49	3092.16	1475.16	1801.64	2185.66	1380.81	1396.4	3754.89	2265.47	3398.61	4418.95	4178.99	2188.73	3486.33	2278.09	1247.64	2068.69	1908.12	2247	7643.63	2379.38	1949.68	5136.14	4656.11	1948.79	2883.13	1961.1	5221.47	2638.78	3501.16	1396.21
M161T389_2	[M-H]-	3-hydroxy-3-methylglutaric acid	1.77558	1.52264	0.267276	161.046	389.477	1.514	HMDB0000355	C03761	Lipids and lipid-like molecules	Fatty Acyls	Fatty acids and conjugates	393.765	10	8	123722	41801.7	72766.2	434146	55944	324949	103784	217000	32583.8	355688	87340.7	217221	34447.6	141274	144635	218694	117911	401980	73149.2	753709	139499	43832.6	241244	131847	172054	48217	48819.7	286769	86163.6	215431	102556	41585.3	123263
M103T394	[M-H]-	3-hydroxybutyric acid	0.106977	1.17224	0.42508	103.04	393.918	2.13123	HMDB0000357	C01089	Organic acids and derivatives	Hydroxy acids and derivatives	Beta hydroxy acids and derivatives	397.189	8	8	3983.25	2576.99	6066.83	3261.78	2558.24	2301.92	2065.5	1937.38	3071.99	2088.8	1581.33	2527.27	2382.48	3072.01	3318.12	1847.11	2046.88	1618.91	1264.12	1870.04	2059.73	1834.7	1568.93	1414.3	2804.06	1993.56	3200.89	1037.07	1299.43	2253.7	1097.9	3298.86	1600.31
M206T264	[M-H-NH3]-	3-hydroxykynurenine	3.88903	0.933957	0.840774	206.046	264.438	1.89356	HMDB0000732	C02794	Organic oxygen compounds	Organooxygen compounds	Carbonyl compounds	266.032	10	10	94566.2	464508	38880.3	2.59342e+06	230013	3.30605e+06	2.81128e+06	1.68112e+06	980557	2.49617e+06	2.38446e+06	1.92475e+06	952739	1.17798e+06	2.91803e+06	2.62469e+06	3.64788e+06	3.34601e+06	1.62276e+06	1.6583e+06	2.92089e+06	908793	3.83267e+06	3.12343e+06	1.64461e+06	662539	132601	2.79955e+06	3.10678e+06	1.68318e+06	5.11211e+06	2.328e+06	2.06112e+06
M243T100	[M-H]-	3-hydroxymyristic acid	0.751369	0.780238	0.454781	243.197	100.4	1.57214	HMDB0061656		Lipids and lipid-like molecules	Fatty Acyls	Fatty acids and conjugates	103.135	6	7	45682.7	51559.7	64329.8	32670.7	93642.8	27442.6	50117.8	21015.2	180767	62974.5	44235.2	76718.4	44500.2	70983.7	114530	43833.7	29128.2	30408.7	37006.5	105817	35443.7	36399.3	72950.5	26712.1	29769.3	39771	63767.7	25538.2	29534.8	27894.4	41675.6	27833.7	28740.7
M159T133	[M-H]-	3-hydroxyoctanoic acid	0.864223	1.50648	0.0812069	159.102	133.464	0.345073	HMDB0001954	C20793	Organic acids and derivatives	Hydroxy acids and derivatives	Medium-chain hydroxy acids and derivatives	139.285	10	10	70588.5	19384.2	48841.4	49893	31223.7	59055.8	21218.3	80646.4	10365	35213.1	46086.3	27789.9	22469.6	49002.4	67976.6	52892.7	48768.6	58119.3	45871.7	50068.2	31357.4	30610	47560.7	24969.1	31409	35046.2	34076.8	38534.4	31392.7	26953.6	83830.3	26801.9	46684.6
M107T50	[M-H-CO2]-	3-hydroxyphenylacetic acid	0.252006	0.711052	0.572684	107.05	49.829	0.608777	HMDB0000440	C05593	Benzenoids	Phenols	1-hydroxy-4-unsubstituted benzenoids	58.872	9	10	72737.7	19521.1	265639	13101.7	143046	7352.97	63511.9	11743.6	27897.5	37806.2	41033.2	34253.5	3294.1	64976.4	198028	25379.8	10341.2	9122.16	6111.43	99444.7	10494.1	22125.3	52295	7803.13	15259.8	4508.14	88897	13105.3	5424.25	6984.94	5571.74	27175.5	24519.8
M467T39	[M-H]-	3'-hydroxyrepaglinide	1.26606	0.99123	0.974292	467.278	39.236	0.232513	HMDB0060979		Organoheterocyclic compounds	Piperidines	Phenylpiperidines	46.009	9	8	65565.6	178008	125558	258911	248584	385973	211101	350601	79478.2	235656	443852	175484	177604	714201	267528	248544	300888	413301	292315	635087	340513	285337	124767	246922	489791	284782	287106	258925	166288	279423	289294	241083	273708
M519T31	[M-H]-	3-hydroxystanozolol glucuronide	0.815631	1.07766	0.802092	519.278	30.895	4.27853			Lipids and lipid-like molecules	Steroids and steroid derivatives	Steroidal glycosides	34.025	9	10	56816.9	374196	59214.2	79828.5	85991.8	97616.5	119808	98240.5	89152.2	94331.5	98535.5	182987	224818	72190	38838.9	84398.4	125305	85433.2	131381	61063.4	128411	102303	68804.6	130844	68693	113631	95573.7	52890.6	104871	87903.9	127415	120698	80123.2
M387T285	[M-H]-	3-isoxazolecarboxamide, 5-(5-chloro-2,4-dihydroxyphenyl)-n-ethyl-4-(4-methoxyphenyl)-	0.221791	1.02184	0.946405	387.061	285.046	2.09846			Benzenoids	Phenols	Benzenediols	316.119	10	10	13050.1	8828.75	31105.6	18973.2	11333.2	82069.9	39399	15463.8	37008.6	16421.1	15841.1	7521.49	27507.7	19428.4	22869.8	15889	16386.6	17887.3	41123.8	19949.2	14554.1	9708.25	19690.5	24072.5	129645	14378.1	10630.2	20144.4	15758.3	19152.5	22202.6	24068.7	15028
M471T154	[M-H-C2H2O]-	3-ketofusidic acid	4.64298	1.05757	0.912888	471.312	153.832	1.99078			Lipids and lipid-like molecules	Steroids and steroid derivatives	Steroid esters	157.494	8	10	901879	8.13827e+06	999284	479469	2.05022e+06	366493	2.07853e+06	1.21537e+06	1.68788e+06	881951	607172	2.72944e+06	2.25771e+06	499683	546985	657824	827320	506685	967919	933789	734009	1.34706e+06	356409	937540	967292	1.37078e+06	1.64322e+06	345516	862613	709311	1.89187e+06	1.30111e+06	314713
M263T36	[M-H]-	3-methoxy-4-hydroxyphenylglycol sulfate	2.72273	0.836099	0.820972	263.023	35.686	0.414001	HMDB0003332		Benzenoids	Phenols	Methoxyphenols	48.503	8	7	1.18305e+06	53161	1.05713e+06	38387.6	777598	26165.3	558113	112771	16042.7	230661	68175.7	120519	179635	139228	2.98183e+06	165449	198930	17093.2	142896	686024	49494.5	106636	326451	128454	115490	163928	213090	86187.6	106156	116573	183135	85674.2	230432
M156T203	[M-H]-	3-methylcrotonylglycine	0.415968	0.698626	0.530641	156.066	203.319	2.56395	HMDB0000459		Organic acids and derivatives	Carboxylic acids and derivatives	Amino acids, peptides, and analogues	209.367	8	7	7675.71	4532.23	12372.1	6348.34	10374.9	3929.61	18214.4	4899.12	3486.39	12632.5	6247.11	5466.96	2802.63	15051.8	62040	6700.64	4419.13	3468.37	3404.52	31837	4661.06	6311.99	27753.8	3208.46	5907.62	3091.71	3106.38	5966.5	1931.27	3620.87	3260.3	3768.35	7051.17
M224T105	[M-H]-	3-(n-morpholino)-2-hydroxypropanesulfonic acid	0.56057	0.699172	0.275099	224.06	104.685	0.510058			Organoheterocyclic compounds	Oxazinanes	Morpholines	121.349	6	7	174035	32918.3	81544.1	36042.4	47934.5	42061.1	79881	23683.2	11266	80465.8	46313.6	153076	36726.6	15691	180260	49097.7	38272.6	37266.5	97139.3	63811.4	50677.6	30556.4	30695.4	34300.4	31573.6	43598.4	30054.5	37191	33857.9	45803.9	75529.7	48442.9	31367.6
M573T400	[M-H]-	3'-o-desmethyletoposide	0.347032	1.39245	0.276675	573.185	400.086	1.23307			Lignans, neolignans and related compounds	Lignan lactones	Podophyllotoxins	414.56	9	8	5082.49	28513.8	6719.64	16574.8	26176.2	29385.3	13623.4	27872.6	4281.55	20738.8	18921.4	12619.9	6374.14	9098.55	13656.5	26752.1	9147.41	15624.2	38987.8	5820.03	29254.6	16186.2	12840.2	7120.62	9758.62	4973.49	1082.8	23363.5	7217.05	22755.4	6865.75	11763.9	18082.8
M632T364	[M-H]-	3'-sialyllactose	0.237797	1.36943	0.322989	632.206	364.257	2.01109			Organic oxygen compounds	Organooxygen compounds	Carbohydrates and carbohydrate conjugates	367.261	6	6	7166.71	4374.9	2024.63	14477.3	5660.09	3210.54	2541.4	5071.11	2695.46	3986.13	4412.36	2356.86	1366.29	2125.17	3575.94	7476.22	2645.03	2647.84	2936.28	2604.35	2742.14	1971.67	2060.37	2548.55	3045.29	3218.48	3789.51	5212.29	2632.96	5167.04	2295.1	6128.96	5556.09
M189T200	[M-H]-	3-(trifluoromethyl)benzoic acid	0.273309	1.18213	0.173127	189.031	199.707	1.75691			Benzenoids	Benzene and substituted derivatives	Trifluoromethylbenzenes	210.852	10	10	14665.1	6717.24	15182.9	11130.2	11521.5	12631.8	13205	13684	7007.52	11698.8	11064.6	12399.7	6300.93	9855.51	15664.4	9542.7	11569.3	11672.4	11727.2	17219.3	12662.2	9195.56	14658.5	13379.2	9190.32	11652.9	10072.6	11869.3	9255.85	11642.6	10259.1	10118.7	10790.9
M131T326	[M-H]-	3-ureidopropionic acid	1.17513	1.72859	0.217902	131.035	326.491	1.53049	HMDB0000026	C02642	Organic acids and derivatives	Organic carbonic acids and derivatives	Ureas	328.868	10	7	31427.6	43306.6	27494.1	259975	38665.1	155995	124499	102213	22748.5	85939	75584	48221.5	27019.1	37057.3	67228.3	91072.9	34023	69932.3	165362	46831.7	160493	59687.8	85766.3	47301.4	46503.8	21784.6	23028.2	168020	31582.7	97249.4	28171	35098.4	64873.2
M303T50_2	[M-H]-	4-(2,3-dihydroxy-3-methylbutoxy)furo(3,2-g)chromen-7-one	0.68313	1.24506	0.224127	303.091	49.8395	2.33533			Phenylpropanoids and polyketides	Coumarins and derivatives	Furanocoumarins	60.153	10	10	274642	713514	220885	505800	344088	432100	404184	569189	115990	480501	493413	406215	583360	435654	442546	393090	580126	826342	582394	558260	491674	745428	260501	435579	512874	766256	266176	486426	475516	436677	699374	588610	353730
M237T82	[M-H]-	4-(2-hydroxyethyl)piperazine-1-ethanesulfonic acid	0.4523	0.950884	0.813327	237.08	81.799	1.34306	HMDB0062295		Organoheterocyclic compounds	Diazinanes	Piperazines	97.28	9	6	111851	56789.8	215539	191994	69516.2	141787	187958	272937	85545.2	189177	267121	253052	290412	173698	212401	151004	271060	221315	146195	168121	357902	155550	75340.6	113899	336449	192862	109440	101952	237553	385243	293429	239770	142747
M283T157	[M-H]-	4,6'-dimethoxy-2'-hydroxychalcone	0.178039	1.03617	0.844382	283.097	157.215	1.64692			Phenylpropanoids and polyketides	Linear 1,3-diarylpropanoids	Chalcones and dihydrochalcones	181.921	6	9	12599.6	25201.8	20111.3	23905.3	15370.2	18027.4	54075.8	13184.5	25475	28133.3	4474.61	31763.5	18926.7	7882.98	36614	28443.5	21911.9	23620.5	34272.6	16225.6	38059.4	25685.7	13259.4	34092.1	8926.24	31978.7	15809.2	19156.3	26645.7	32967.9	26547.8	12002	11894.5
M234T338	[M-H]-	4-chloro-3-sulfamoylbenzoic acid	0.380696	1.42928	0.732152	233.985	338.342	0.809346			Benzenoids	Benzene and substituted derivatives	Benzenesulfonamides	344.403	7	7	84278.6	1703.62	86205.5	1244.15	4083.57	1504.04	2655.87	1399.05	12297.3	882.344	600.052	786.997	1326.37	715.651	2300.24	1526.28	1628.41	1261.96	629.881	1446.42	633.93	1184.11	1343.68	1576.91	537.354	334.339	32836.3	839.244	575.594	1067.79	1510.55	3438.39	1362.06
M343T55	[M-H]-	4-hydroxy-5e,7z,10z,13z,16z,19z-docosahexaenoic acid	0.505003	0.738289	0.0630508	343.228	54.639	3.24823			Lipids and lipid-like molecules	Fatty Acyls	Fatty acids and conjugates	71.662	9	10	314811	203384	211017	216933	192644	250672	249522	171411	470300	358358	257440	457977	239467	174591	245910	237028	253704	246790	266128	171087	227341	228737	122354	286420	174825	168803	161140	288921	196338	225045	294535	202434	217391
M121T39	[M-H]-	4-hydroxybenzaldehyde	0.971293	0.807572	0.27869	121.029	38.9685	4.65532	HMDB0011718	C00633	Organic oxygen compounds	Organooxygen compounds	Carbonyl compounds	55.54	10	10	265586	497812	164364	234562	759070	276218	708891	287058	348768	242709	419811	359672	386883	427786	347730	156542	303873	399721	229611	287738	298020	395683	221025	134672	327310	197623	267884	295279	261104	504239	89567	524364	427638
M310T31_1	[M-H]-	4'-hydroxydiclofenac	1.00528	0.977872	0.942062	309.985	30.9215	1.20204	HMDB0013974		Benzenoids	Benzene and substituted derivatives	Halobenzenes	32.919	10	10	14796.4	12200.2	7746.78	154151	2287.94	233723	121355	195708	75191.3	112570	197126	86830.1	122956	144739	125205	129216	193651	174164	120016	54637.2	165434	61027.7	109202	184054	31836.1	69269.9	8139.2	140962	155447	102833	135449	130614	149868
M162T48	[M-H]-	4-hydroxy-l-glutamic acid	1.71512	0.731465	0.625831	162.056	48.472	0.406105		C05947	Organic acids and derivatives	Carboxylic acids and derivatives	Amino acids, peptides, and analogues	51.695	10	9	29167.2	30719.2	307602	18609.8	73804.9	17828.1	137603	20628.2	309453	103625	143760	27510.8	103971	975498	586988	12176	35452	19478.3	46169.7	216887	21201.2	105125	119892	22220.6	20947	153713	8545.55	36553.3	7857.84	22265.4	31124.6	18248	43398.3
M151T147	[M-H]-	4-hydroxyphenylacetic acid	0.525481	0.343215	0.179573	150.989	147.279	2.96832	HMDB0000020	C00642	Benzenoids	Phenols	1-hydroxy-2-unsubstituted benzenoids	153.634	10	9	62768	2259.89	2993.19	3371.43	2527.08	6925.66	26786.8	4128.48	687.907	19987.1	7004.6	11845	5506.19	12846	54242.9	9321.64	570.244	2230.94	1367.04	42873.6	3415.34	2387.86	22098.2	1765.91	3385.77	2808.16	1735.75	4623.83	2389.33	3038.99	9793.14	1813.23	5446.97
M208T72	[M-H]-	4-morpholinopropanesulfonic acid	2.42831	0.514437	0.239829	208.065	72.067	0.347608			Organoheterocyclic compounds	Oxazinanes	Morpholines	84.239	10	10	1.73618e+06	175714	1.70091e+06	150332	480158	65090.5	291678	90785.3	1.57047e+06	173940	735132	885969	62460.7	391887	1.59621e+06	88691.1	93155.4	84262.7	295014	798876	129397	184861	247548	24015.5	72669.8	33812.5	934972	71815.7	55206.4	105142	559273	2.30356e+06	108185
M138T339	[M-H]-	4-nitrophenol	0.152534	1.23612	0.551397	138.042	339.303	1.48786	HMDB0001232	C00870	Benzenoids	Phenols	Nitrophenols	341.391	8	6	13986.9	13061.4	12560.4	12232.9	12439.8	4005.94	1894.34	3090.81	1895.64	2417.14	2860.67	1691.44	3101.4	2750.75	2137.29	1713.65	2937.24	2885.99	3263.6	12537	2399.03	2962.46	12121.6	3197.03	12133.2	1880.98	656.39	13013.7	2197.54	1648.15	2911.43	13681.1	3447.66
M411T71	[M-H]-	4-pregnen-17.alpha., 20.beta.-diol-3-one-20-sulfate	0.690292	0.52634	0.0544137	411.163	71.277	3.33651			Lipids and lipid-like molecules	Steroids and steroid derivatives	Sulfated steroids	84.451	5	4	6950.87	6700.58	35467	21361.5	55714.4	10792.6	19543.8	12039.1	19657.8	55358.3	20171.8	45896	55234.6	43943.9	56751.3	37985	9512.23	6779.9	53530.3	21159.7	12205.3	17107.7	6495.56	49019.4	47928.7	16544.3	3010.71	38880.2	13497.5	32926.1	15219.6	56628.5	9744.82
M182T45	[M-H]-	4-pyridoxic acid	3.33353	0.874951	0.320729	182.046	44.5275	9.14775	HMDB0000017	C00847	Organoheterocyclic compounds	Pyridines and derivatives	Pyridinecarboxylic acids and derivatives	48.503	10	10	1.68184e+06	719706	1.19147e+06	1.61109e+06	1.15469e+06	1.89399e+06	1.37239e+06	1.5649e+06	1.16415e+06	1.28822e+06	1.77636e+06	1.15103e+06	1.91445e+06	2.14816e+06	2.5899e+06	1.92828e+06	1.69779e+06	2.23892e+06	1.57947e+06	1.64917e+06	1.36581e+06	1.38051e+06	1.87591e+06	1.82723e+06	1.45955e+06	1.09763e+06	1.45441e+06	1.79258e+06	1.34521e+06	1.48109e+06	1.48927e+06	1.90955e+06	1.93909e+06
M456T346	[M-H]-	5,10-methylene-thf	0.128085	0.946928	0.809088	456.154	346.32	1.65975	HMDB0001533	C00143				354.856	8	6	3616.86	2664.46	1332.87	5912.68	3410.38	3975.98	3059.35	5848.64	1376.61	2706.04	4365.03	10176.6	1981.38	3002.34	1790.73	2081.73	4113.26	7357.96	6864.72	3604.09	3721.72	2709.77	3048.2	2424.67	3708.99	2396.13	1999.54	7271.75	4214.84	8679.45	5620.95	5715.86	3009
M301T192_2	[M-H-H2O]-	5,8,11,14-eicosatetraenoic acid, 16-hydroxy-, (5z,8z,11z,14z,16r)-	0.54905	0.805725	0.130633	301.202	192.161	1.15273			Lipids and lipid-like molecules	Fatty Acyls	Eicosanoids	199.104	8	7	95067.6	39428.7	29699.6	41875	58247.6	55639	43182.9	29029.5	28410.5	47810.7	54570.6	73784.2	61118	62293.5	45557.5	59070.6	39457.4	64504.9	40007.4	65117.8	56434.8	41783	25358.4	26206.1	88410.9	43046.9	51616.5	46175.1	25088.9	52531.8	47444.2	77101.8	51904.1
M467T147_2	[M-H]-	5.alpha.-androstan-3.alpha.,17.beta.-diol-o-3-.beta.-glucuronic acid	5.27958	0.933193	0.811694	467.278	147.479	2.84782			Lipids and lipid-like molecules	Steroids and steroid derivatives	Steroidal glycosides	155.126	10	10	1.17601e+06	2.74602e+06	788279	3.20534e+06	2.04131e+06	4.55385e+06	3.55841e+06	5.70903e+06	1.20301e+06	3.377e+06	6.72748e+06	2.59901e+06	2.64465e+06	9.24151e+06	5.87776e+06	3.33644e+06	4.93309e+06	6.6628e+06	3.84949e+06	7.72678e+06	4.71069e+06	3.71423e+06	1.63008e+06	2.85697e+06	6.27159e+06	3.96666e+06	2.17491e+06	3.546e+06	2.54815e+06	4.2377e+06	4.17763e+06	2.80663e+06	2.91982e+06
M222T56	[M-H]-	5-aminonaphthalene-2-sulfonic acid	0.738805	0.734007	0.294874	222.023	56.2055	1.70137		C06152	Benzenoids	Naphthalenes	Naphthalene sulfonic acids and derivatives	66.8	9	6	4646.96	6977.44	24328.5	96550	27181.5	58791.2	104085	120591	23317.4	95945.2	126337	77965.5	225942	81456.9	118135	100860	149100	221525	106622	49811.3	64689.9	76488.9	46710.2	123554	59837.6	86645	12155.7	133030	69716.9	88559.7	108747	71532.1	80548.3
M152T317	[M-H]-	5-aminosalicylic acid	0.366927	1.16579	0.427246	152.035	317.303	1.98829	HMDB0014389	C07138	Benzenoids	Benzene and substituted derivatives	Benzoic acids and derivatives	323.437	6	6	9544.71	12743.1	9916.01	25725.6	10004.4	27501.8	8814.55	13979.9	15390.9	11989.2	11791.3	14784.6	9964.3	10496.2	12326.8	12544.9	26956.9	26966.7	10074.4	10904.3	11766.2	10572.8	13680.1	13183.6	10541.9	16394.4	12216.1	13465.6	11689.2	18935.2	12311.4	21356.4	10845.5
M381T27	[M-H-HF]-	5-heptenoic acid, 7-[(1r,2r,3s,5s)-2-[(1e,3s)-3-(2,3-dihydro-1h-inden-2-yl)-3-hydroxy-1-propen-1-yl]-3-fluoro-5-hydroxycyclopentyl]-, (5z)-	0.594258	0.848765	0.656523	381.232	26.806	0.488636			Lipids and lipid-like molecules	Fatty Acyls	Fatty acids and conjugates	37.86	9	10	34417.7	46085	40635.1	44806	38254.9	140069	43309	68409.7	62402.5	69351.3	88277	42506.5	107640	281242	52635.8	75177.4	63904.9	110380	48494.9	47839.2	49336.8	46733.8	64504.4	112334	93979.4	58704	96482.5	58729.2	57720.8	57489.7	69507.3	41932.8	69670.5
M267T124	[M-H-C7H5NO]-	5-heptenoic acid, 7-[(1s,2r,3r,4r)-3-[[2-[(phenylamino)carbonyl]hydrazinyl]methyl]-7-oxabicyclo[2.2.1]hept-2-yl]-, (5z)-	0.640092	1.05966	0.795492	267.16	124.346	1.31491			Benzenoids	Benzene and substituted derivatives	N-phenylureas	129.019	7	7	171830	31082.9	80352.1	89677.9	54964.3	36125.8	47541.7	85986.2	22884.2	39857.6	69769.9	28644.6	35160.2	100878	46208.7	47810.6	56875.7	161750	112337	297908	41560.2	129957	32603.1	29354.9	235088	25965.8	132496	34982.8	30567.7	93602.4	49367.2	102949	110159
M131T236	[M-H]-	5-Hydroxyhexanoic acid	0.199758	0.714356	0.176968	131.071	236.337	2.35129						239.055	8	10	35829	9351.16	21055.2	9950.95	31932.7	10039.9	8085.18	14805.7	22108.6	6816.26	14687.8	15784.9	9421.02	28447.1	16654.2	17228.2	15991.7	21045.7	8247.61	31586.9	10091.8	10544.1	15687.4	5150.19	24873.8	6788.49	20000	8072.45	7307.19	9569.29	13429.6	19995.8	10530.2
M159T173	[M-H]-	5-hydroxyvalproic acid	1.21503	1.52298	0.10366	159.102	172.906	4.03054	HMDB0013898	C16650	Lipids and lipid-like molecules	Fatty Acyls	Fatty acids and conjugates	181.923	10	10	15133.4	19645.4	58045.9	124412	32324.6	92996.2	34091.5	163900	16514.3	61280.9	79974.1	44135.8	58091	76415.3	81731.1	84417.1	90281	93331.3	92892	72556.8	77462.3	60830.9	72873.1	58330.3	59131.7	69708.9	66273.9	75699.1	58882	62548.9	149935	62656.8	79812.2
M255T383	[M-H]-	5'-O-methylthymidine	0.0771331	0.797598	0.276541	255.099	382.676	0.567369			Nucleosides, nucleotides, and analogues	Pyrimidine nucleosides	Pyrimidine 2'-deoxyribonucleosides	385.46	7	8	4517.53	3769.92	4402.46	3250.34	6068.07	2720.91	4268.6	6528.37	5357.78	4181.12	3059.46	13802.5	3887.73	2441.72	3367.4	3069.55	3392.96	2772.68	4219.98	2695.06	2946.81	2979.65	2697.98	3771.57	2994.89	4060.19	5508.29	2740.34	8693.02	2716.63	4111.48	5148.4	2327.52
M337T29	[M-H]-	5'-phosphoribosyl-5-amino-4-imidazolecarboxamide (aicar)	2.21108	1.00747	0.97394	337.039	28.56	1.60643	HMDB0001517	C04677	Nucleosides, nucleotides, and analogues	Imidazole ribonucleosides and ribonucleotides	1-ribosyl-imidazolecarboxamides	30.83	10	10	974468	398403	458304	984690	484611	1.84179e+06	895621	715242	325397	1.22664e+06	669254	890923	421409	671470	1.36176e+06	1.3213e+06	893746	444309	875578	870451	1.17683e+06	1.09101e+06	1.66009e+06	1.36532e+06	662873	903531	519872	914842	1.1437e+06	948433	1.27808e+06	1.19124e+06	824483
M347T294	[M-H-H2O]-	5s,12r-dihydroxy-6z,8e,10e,14z-eicosatetraene-1,20-dioic acid	0.0568309	0.860925	0.409167	347.186	294.238	4.42425			Lipids and lipid-like molecules	Fatty Acyls	Fatty acids and conjugates	304.458	7	8	6163.8	4605.65	2175.7	8721.9	6624.59	12848.5	4507.35	15062.3	12867.2	9819.39	6959.64	9530.91	8484.62	7663.57	9552.81	7346.75	8592.65	8350.99	8496.02	6610.48	10181.9	5292.37	9697.5	9810.2	7073.35	7792.93	4080.53	8203.05	4139.22	6114.17	11494.3	8680.96	3013.05
M333T102	[M-H-H2O]-	5(s),14(r)-lipoxin b4	1.21701	0.748917	0.403829	333.207	102.282	0.955106		C06315	Lipids and lipid-like molecules	Fatty Acyls	Eicosanoids	105.595	8	6	71455.7	35722	38012.7	51343.4	53476.1	66739.4	138457	73173.8	53295.5	215132	114996	208044	60647.3	261327	237079	101275	115918	74342.1	85941.4	200631	102826	91971.7	205551	95735.7	78491.8	46671	39409.8	72581	49735.6	65084.1	69914.7	52721.4	115084
M525T426	[M-H]-	(5z)-4-[2-[2-(3,4-dihydroxyphenyl)ethoxy]-2-oxoethyl]-5-ethylidene-6-[(2s,3r,4s,5s,6r)-3,4,5-trihydroxy-6-(hydroxymethyl)oxan-2-yl]oxy-4h-pyran-3-carboxylic acid	0.230941	1.24015	0.227724	525.143	425.567	0.528041			Lipids and lipid-like molecules	Prenol lipids	Terpene glycosides	428.673	8	6	1139.9	3893.19	2174.72	8538.25	3725.71	5025.74	4519.75	8752.9	4265.33	10087.2	5943.23	3256.24	3088.3	3745.43	6834.92	7856.14	5073.2	6048.71	5967.89	4627.6	5905.44	4816.19	4595.74	4202.93	5679.34	5523.42	3196.93	11278.3	6122.28	5215.96	4336.26	3982.77	5000.87
M441T29_2	[M-H]-	6,8-dihydroxy-2,2,4,4-tetramethyl-7-(3-methylbutanoyl)-9-(2-methylpropyl)-9h-xanthene-1,3-dione	0.543151	0.994339	0.981332	441.253	28.815	5.93435			Organoheterocyclic compounds	Benzopyrans	1-benzopyrans	39.665	6	4	188978	208937	134226	40187.5	170433	98447.3	36638.2	249756	239440	63567.2	11727.5	167193	80918.6	126581	32592.9	187391	177712	94159.5	56458	32009.2	154534	56404	36403.8	84511.2	77045	188677	51144.6	161158	195916	170179	212732	171046	71028.7
M455T364	[M+C2F3O2]-	6.alpha.-mannobiose	0.100591	1.01889	0.953891	455.102	364.426	1.07583			Lipids and lipid-like molecules	Fatty Acyls	Fatty acyl glycosides	367.261	9	9	152415	5536.92	10817.9	14807.8	19419.1	3748.52	11558	18915.2	4963.31	16453.1	29923.3	3379.97	4462.59	7904.41	22598.3	18923.9	4312.66	7088.87	7149.25	11555.9	5502.76	2924.52	7963.77	4122.34	9775.09	7041.97	5537.41	6109.17	6606.77	4081.64	9329.29	3972.72	5254.56
M212T257	[M-H]-	6-(trifluoromethyl)quinolin-4-ol	0.126295	0.910972	0.874899	212.023	257.039	2.68616			Organoheterocyclic compounds	Quinolines and derivatives	Quinolones and derivatives	281.526	10	10	186021	3625.24	78435.8	3204.71	44268	3663.91	15061	2715.52	1190.51	8959.67	3744.02	7353.59	5068.76	7921.65	48127.2	2422.05	7568.07	3082.11	4420.64	16079.6	4439.34	2977.36	14503.5	2921.43	2814.88	7254.55	8793.93	3912.48	4021.36	2238.66	3577	6232.98	3818.69
M219T268	[M-H]-	7-hydroxycoumarin-4-acetic acid	0.0704701	0.829488	0.451205	219.042	267.588	0.513682			Phenylpropanoids and polyketides	Coumarins and derivatives	Hydroxycoumarins	284.319	10	9	120891	23914.8	50235.8	32052	43783.6	18793.1	19538.6	20807.3	31723.4	12737.2	16525.6	14644	14708.3	21422	35176.8	21886.9	35012	45542.1	7952.92	14181.5	10606.6	8279.55	36828.8	14551	57567.2	13898.1	120739	7627.01	9396.16	13618.3	19519.3	46163.1	18113
M479T38	[2M-H]-	7-hydroxyflavanone	0.420669	1.26011	0.269974	479.151	37.6065	3.42073		C14290	Phenylpropanoids and polyketides	Flavonoids	Flavans	51.683	10	8	28995.6	12931.9	30194.1	45146.8	7083.54	63353.2	11049.7	51356.8	9748.45	17830.8	61629.3	55400.3	49691.8	21189.8	45058.9	35872.3	39913.2	42481	67546.7	61845.6	51872.2	38677.4	20448	57573.6	8500.94	56866.2	9902.82	46582.5	25065.6	69193.1	23219.1	43239.1	17661.7
M462T344	[M-H]-	7-methylthioheptyl glucosinolate	0.104063	0.856462	0.374632	462.093	343.659	1.26718		C17252	Organic oxygen compounds	Organooxygen compounds	Carbohydrates and carbohydrate conjugates	349.992	8	9	3603.14	1987.47	3188.71	3171.7	2296.08	3125.67	1421.99	1005.62	2303.66	1803.34	6474.83	7414.41	1472.64	2747.9	5317.18	5606.09	2838.18	2885.01	7494.39	2330.84	2428.06	3230.48	2666.99	3089.57	1392.84	673.175	2059.03	3100.52	2967.96	2767.87	1805.89	3742.83	2406.62
M399T34	[M-H]-	7-oxocholesterol	0.474988	0.963361	0.841425	399.311	34.352	0.0146484			Lipids and lipid-like molecules	Steroids and steroid derivatives	Cholestane steroids	39.777	7	7	74257.1	77133.1	106246	151810	110938	176097	5282.27	70650.1	262858	168914	79807.7	76477	79763.2	83576	136777	111667	121186	154355	73929.3	140943	143848	123131	61130.3	35454.1	178994	79944.7	187017	181926	91575	42313	144406	61282	135399
M379T283_2	[M-H]-	8-desoxygartanin	0.261279	0.62139	0.147806	379.141	283.265	1.07819	HMDB0030701		Organoheterocyclic compounds	Benzopyrans	1-benzopyrans	294.933	6	6	3031.54	3561.48	2835.02	3408.06	5611.76	3956.82	1854.22	4266.3	3659.39	2783.81	3108.28	1711.84	1974.61	3206.16	16041.9	2663.98	3451.33	3495.52	1436.02	3913.13	2240.74	1907.87	3439.45	2631.66	3838.07	2685.45	1690.52	2876.12	2197.06	3100.97	1978.52	6934.23	2168.84
M299T34_2	[M-H]-	8phic8spc	1.44433	0.917178	0.738085	299.096	33.798	1.19062			Benzenoids	Benzene and substituted derivatives	Benzenesulfonic acids and derivatives	36.899	10	10	59435.7	83244	64325.2	371156	60078	418211	299681	408995	80216.6	364687	477704	280872	465865	413706	333159	386797	410979	409043	344767	247732	350149	206125	287910	291395	217743	169476	85941.8	376420	333439	259236	379350	373330	350963
M307T46	[M-H]-	8z,14z-eicosadienoic acid	2.99083	0.740361	0.238349	307.264	45.973	0.486683			Lipids and lipid-like molecules	Fatty Acyls	Fatty acids and conjugates	47.545	10	10	490236	831833	398503	322282	767379	257825	438194	323350	1.41066e+06	997628	434384	1.0742e+06	1.44269e+06	430473	747024	435986	268294	370508	681274	462144	369962	611952	334275	361902	284775	1.28673e+06	568242	490241	517169	894362	626746	536147	305519
M261T190	[M-H]-	9-(2,3-dihydroxypropoxy)-9-oxononanoic acid	0.570016	0.91334	0.651023	261.132	190.022	4.71977			Lipids and lipid-like molecules	Fatty Acyls	Fatty acids and conjugates	192.254	9	6	19623.2	17601	38882.2	81323.6	44948.3	50890.2	32258.3	47950.8	14689.9	61038.6	53294.1	33246.7	27065.8	69384.6	54359.3	40630.1	55006.7	121825	94763.1	86415.5	45611.1	17658.9	39511.9	32615.2	95451.1	25123.8	24546.4	34420	32101.5	54400	48200.5	44997	37371.8
M305T368	[M-H]-	(9a-hydroxy-3,8a-dimethyl-5-methylidene-2-oxo-4,4a,6,7,8,9-hexahydrobenzo[f][1]benzofuran-8-yl) acetate	0.286027	1.18963	0.445497	305.16	368.079	1.57949			Lipids and lipid-like molecules	Prenol lipids	Terpene lactones	371.411	4	7	28214.4	9538.11	21065.8	16370.8	14339.8	7985.69	5454.11	6128.18	12072.4	8597.3	4629.82	5903	3747.49	7710.56	7045.17	4598.12	4999.15	7259.27	5364.53	14076.3	6827.4	5436.86	5566.42	4588.69	10764.8	7198.97	11106.1	6469.52	5556.53	9397.82	5773.71	11379.5	3609.62
M377T36_2	[M-H]-	9-deoxy-9-methylene-16,16-dimethylprostaglandin e2	0.308399	0.929915	0.763467	377.27	36.498	2.50709			Lipids and lipid-like molecules	Fatty Acyls	Fatty acids and conjugates	38.636	7	7	68909.5	45221.9	43296.7	15534.3	73443.9	58931.9	43104.1	26541.4	94639.9	27752.1	42143.7	28489.3	21750.1	61973.4	45080.1	23365.4	30236.7	25043.6	53395.4	50951.7	55063.1	25912.6	30811.4	22089.6	30344.1	59354.7	27106	22627.2	20253.1	18374.2	79302.5	29198.8	25893.7
M352T76	[M-H]-	9h-xanthene-9-propanoic acid, .alpha.-amino-.alpha.-[(1s,2s)-2-carboxycyclopropyl]-, (.alpha.s)-	1.61019	0.217266	0.16903	352.122	76.441	1.76618			Organoheterocyclic compounds	Benzopyrans	1-benzopyrans	89.689	8	6	24441.6	5301.45	8965.37	30056.6	18831.5	27509.3	66400.7	31864.5	14743.7	23583.1	597603	318245	39964.6	62597.9	72142.6	10076.9	48054.9	31841.5	828780	33749.3	80191.1	59067.6	21590.2	28143.9	4786.16	29463.4	16621.5	39470.4	35895	25876.3	114018	581785	8710.94
M309T81	[M-H]-	9-hydroperoxy-10e,12z,15z-octadecatrienoic acid	6.15725	1.52294	0.134363	309.207	80.847	3.30883			Lipids and lipid-like molecules	Fatty Acyls	Lineolic acids and derivatives	82.977	8	7	470040	503240	1.70739e+06	3.27137e+06	504418	2.09322e+06	1.28687e+06	4.36041e+06	415165	2.77631e+06	2.5959e+06	1.4735e+06	1.54301e+06	2.2502e+06	2.60333e+06	2.12811e+06	2.43045e+06	2.79461e+06	2.91288e+06	2.21565e+06	1.8878e+06	1.90352e+06	2.35453e+06	1.45092e+06	1.46682e+06	1.67557e+06	1.72713e+06	2.12371e+06	1.50627e+06	1.67589e+06	3.45528e+06	1.57609e+06	2.43887e+06
M341T33	[M-H]-	9-phenyl-1-(2,4,6-trihydroxyphenyl)nonan-1-one	0.984045	1.22413	0.322988	341.179	32.5355	1.57787			Organic oxygen compounds	Organooxygen compounds	Carbonyl compounds	36.249	9	9	32857.1	33601.7	37481.3	80750.5	30453.3	99103	82591.7	137020	35032.4	45953.9	90757.2	91496.8	43344.6	78394.1	52507.3	92468.1	76967.2	68091	113401	52150.5	71407.5	85703.3	38498.6	86440.4	53375.3	54299.3	44892.5	103770	77048.7	65284.7	111639	29480.7	79971.1
M363T186_1	[M-H-H2O]-	9s,11r,15s-trihydroxy-20a,20b-dihomo-5z,13e-prostadienoic acid	0.157174	1.00842	0.979298	363.254	185.995	2.18364			Lipids and lipid-like molecules	Fatty Acyls	Eicosanoids	198.794	7	7	4438	33242.8	17367.3	3292.61	4465.63	16191	5598.74	9595.76	11560	4046.91	5757.51	27373	16668.3	22013.4	18017.2	7765.61	4197.53	2219.49	6359.22	21203	8160.15	3171.16	13262.6	7359.71	4811.79	15100.6	20356.9	16048.8	6915.46	5730.49	19260.9	1856.22	2897.01
M293T103	[M-H]-	9s-hydroxy-10e,12z,15z-octadecatrienoic acid	0.125297	0.829308	0.68965	293.212	103.322	5.28987			Lipids and lipid-like molecules	Fatty Acyls	Lineolic acids and derivatives	119.846	10	7	58850.3	29214.2	54011.9	75975.5	44540.7	73158.3	479685	106703	93500.3	151418	214907	65927.9	77367.1	133353	231086	77401.9	99573.4	90997.7	84037.1	273509	124391	99206.1	183462	59156.9	358830	532555	120787	101567	48622.7	562718	101231	74502.1	91779
M180T122_2	[M-H]-	Acamprosate	0.752167	0.778131	0.727089	180.034	121.779	3.25197	HMDB0014797		Organic acids and derivatives	Organic sulfonic acids and derivatives	Organosulfonic acids and derivatives	130.586	10	10	1.39033e+06	318798	5.32894e+06	206759	667144	45179.3	470760	98344.9	696667	223237	437589	2.22177e+06	61460.6	237766	1.48905e+06	129798	113883	66453.5	262415	404135	304146	243439	222012	60063.1	40943.6	18588.9	1.70441e+06	66028.5	69257.6	163059	1.57017e+06	4.20512e+06	132600
M418T51_2	[M-H]-	Acetic acid, 2-[4-[(5,6-diphenyl-2-pyrazinyl)(1-methylethyl)amino]butoxy]-	1.4567	1.66371	0.383938	418.227	51.1245	0.157318			Organic nitrogen compounds	Organonitrogen compounds	Amines	72.197	9	10	56037.9	51171.6	783369	60426.6	43470.5	69876.3	81857.1	194460	31475.9	124110	74160.5	793127	44608.9	37387.9	75076.1	64199	72028	73371.5	71893.2	57380.6	70712.5	14200	110747	61684.5	59467.5	57484	258228	68164.3	62005.2	251478	83844	88233.3	51174.9
M485T245_2	[M-H]-	Acetoxystachybotrydial acetate	4.28732	0.705942	0.355468	485.221	244.736	0.798756						247.515	10	10	113160	1.81221e+06	354352	1.2961e+06	1.40706e+06	575446	1.47968e+06	148157	2.00139e+06	1.78229e+06	598253	1.25358e+06	3.43449e+06	163803	215604	737207	128536	46235.7	1.63155e+06	115167	1.55418e+06	2.17329e+06	83167.9	156265	68664.2	1.97491e+06	45967.8	620159	722557	1.47725e+06	2.62217e+06	1.29104e+06	167383
M134T194	[M-H]-	Acetylaniline	1.2962	0.716328	0.563981	134.061	194.097	0.684601	HMDB0001250	C07565				200.208	10	10	116976	32159.3	156819	52724.7	126166	18864.8	122823	29911.9	34893.2	126142	47927.1	67890.5	6374.63	111837	488112	42879.8	25726	31265.7	13538.9	165372	26276.3	46878.7	218360	14635	40610.8	6209.14	102023	30175.7	12492.8	14068.4	10457.8	60296.8	50264.5
M92T100	[M-H]-	Alanine-2,3,3,3-d4	0.162798	0.805351	0.647782	92.0502	99.8585	2.8707			Organic acids and derivatives	Carboxylic acids and derivatives	Amino acids, peptides, and analogues	103.3	4	8	76627.6	3165.16	64367.5	5266.54	9008.07	6392.36	15643.8	5485.7	10124.2	10661	9180.88	10740.2	10345.9	21375.4	42513.1	8443.16	12554.4	6495.15	5790.03	27784.7	7465.13	7008.91	27396.5	9119.82	8324.96	2935.28	48978	5915.63	5577.95	6506.94	7174.38	3915.51	6900.46
M307T263	[M-H]-	Albocycline	0.130057	1.04195	0.797294	307.167	263.138	3.32331						276.704	9	6	6109.13	3109.08	3220.79	1855.46	3386.69	3789.23	4135.69	6458.22	5317.96	5512.16	3569.69	4038.42	4407.09	3389.96	2000.91	4090.61	3790.39	1846.48	2885.31	2607.1	3181.26	1908.65	5355.7	3786.19	2548.65	4680.86	2162.26	1943.69	1932.66	3483.86	5861.51	2651.18	2812.76
M303T31_2	[M-H]-	Aleuritic acid	1.27443	0.704079	0.531412	303.199	30.961	0.409812			Lipids and lipid-like molecules	Fatty Acyls	Fatty acids and conjugates	49.202	10	10	97422.3	68464.4	71339.9	80927.4	57514	211195	78716.8	115837	64031.6	125118	119502	91502.3	172661	847013	193565	69847.2	97208.6	170609	121279	86009.1	76281.3	100794	74163.1	135066	120083	103708	160821	108643	78550.7	84520	132636	67530.3	112263
M577T55	[M+HCO2]-	Alisol a 24-acetate	0.541143	1.20105	0.533881	577.351	54.515	1.00947			Lipids and lipid-like molecules	Prenol lipids	Triterpenoids	65.892	10	10	38146.8	91304.4	49814	71953.9	34703.1	77170.8	77197.6	127739	46989	74429.3	166407	45364.6	77805	206640	130638	96095.3	178149	123951	80564.5	230678	116162	148308	80226.6	51907.7	280877	120140	52314.6	110655	78296.9	116689	120827	59262.5	112422
M351T307	[2M-H]-	Allantoic acid	0.455815	1.22189	0.504582	351.111	307.379	1.78895	HMDB0001209	C00499	Organic acids and derivatives	Carboxylic acids and derivatives	Amino acids, peptides, and analogues	321.939	9	7	10761.6	13838	13048.5	66453	4977.85	35655.6	8895.95	28629.1	22115.5	18766.4	19331.7	8428.84	17710.8	19492	43431.7	9742.24	15083.5	20428.9	13956.8	27716.9	12276.3	12722.4	17260.5	9103.91	18928.5	21115	5922.71	68348.3	19448.6	10787.1	24267.9	18246.8	22497.9
M393T414	[M-H]-	Aloesin	0.145278	1.01697	0.943797	393.104	414.446	0.405045		C08994	Organic oxygen compounds	Organooxygen compounds	Carbohydrates and carbohydrate conjugates	417.403	10	10	4803.48	2955.61	5062.46	4618.44	8418.22	4502.56	5656.15	4972.59	6891.97	3327.01	2656.68	2939.47	1674.33	3547.48	4725.39	3007.29	2576.72	5691.23	2280.64	5801.09	3785	3578.85	3224.25	4856.67	2311.74	3159.25	4332.55	3724.11	2083.08	7048.55	6648.13	3677.8	3671.23
M441T396	[M-H]-	.alpha.-apooxytetracycline	0.333326	1.47327	0.178014	441.125	396.473	0.955852						399.181	9	9	5029.59	3975.24	3938.18	12321.4	3157.05	17229.5	4972.59	10552.1	1180.88	11396.5	4156.01	5334.32	2640.3	4031.56	7656.06	8284.52	6385.05	8537.99	5444.83	6231.32	15324	8202.5	7345.28	10256.6	3181.26	3078.98	4067.61	10805.6	5943.09	8951.83	6296.64	6305.44	6284.32
M179T304	[M-H]-	Alpha-d-glucose	6.61365	1.88455	0.262895	179.056	304.488	0.531638	HMDB0003345	C00267	Organic oxygen compounds	Organooxygen compounds	Carbohydrates and carbohydrate conjugates	319.169	10	9	234112	120807	301435	4.02695e+06	609855	4.94499e+06	434275	4.26621e+06	42929.7	546565	214346	1.36351e+06	60007.6	1.86087e+06	1.44342e+06	770273	963956	3.26779e+06	452032	3.57898e+06	934234	152908	2.02812e+06	698660	1.70487e+06	69650.3	377047	4.78308e+06	572210	592514	517924	159786	1.04221e+06
M795T249	[M+HCO2]-	.alpha.-hederin	0.319057	1.03386	0.918725	795.456	248.653	0.922889		C08954	Lipids and lipid-like molecules	Prenol lipids	Triterpenoids	250.164	10	10	44984.9	9111.1	37219	19858.6	27756.1	15400	13308.7	14420.8	2984.81	13174.1	9394.83	8051.47	10477.6	6573.45	8642.18	18621.8	12191.2	8592.99	8317.24	7908.31	7215.8	15816	8146.86	9877.28	25475.2	7084.42	71361.6	16708.8	6447.6	29565.4	4844.62	21501.1	13668.9
M147T68	[M-H]-	.alpha.-keto-.gamma.-(methylthio)butyric acid	0.536578	0.456449	0.191625	147.012	68.42	2.7228	HMDB0001553	C01180	Lipids and lipid-like molecules	Fatty Acyls	Fatty acids and conjugates	89.795	10	9	253339	18917.8	27321.2	12005.9	120307	11077.5	23827.3	12582.3	2528.51	15006.1	25952.8	8849.2	7614.26	18726.6	100478	25716.5	7963.39	911.102	14077.2	11360.3	15914.3	22423.8	27132.3	18933.5	13745.7	8909.34	40319.4	34183.4	9205.46	10042	11235.6	36164.8	22558.5
M115T71	[M-H]-	Alpha-ketoisovaleric acid	2.43382	1.30899	0.350405	115.04	70.721	3.80845	HMDB0000019	C00141	Organic acids and derivatives	Keto acids and derivatives	Short-chain keto acids and derivatives	83.681	10	10	270869	322109	434418	1.09111e+06	1.165e+06	796588	211892	679994	72798.3	308827	279808	252958	107518	482472	606707	366008	390539	481136	329021	609124	509794	637808	356886	160374	582775	172430	264744	412764	158792	446946	190073	464732	314425
M429T32_2	[M-H]-	alpha-Tocopherol (Vitamin E)	0.846385	0.796763	0.114031	429.373	32.31	2.21918	HMDB0001893	C02477	Lipids and lipid-like molecules	Prenol lipids	Quinone and hydroquinone lipids	33.48	9	10	99787.5	234321	109297	265034	156268	216073	431539	228176	301686	339488	327578	258161	354400	223837	256426	245556	334402	209782	260621	193299	352264	283768	387247	269187	212809	305757	110284	344431	344105	355985	374247	287433	278762
M304T156	[M-H-CO2]-	Ampicillin	0.114398	0.799336	0.374261	304.117	156.117	9.39916	HMDB0014559	C06574	Organoheterocyclic compounds	Lactams	Beta lactams	172.763	8	7	10206.2	13492.7	9380.02	15586.8	13726.8	21830.8	17503.6	15561.7	20478	40426.1	13730.6	18199	38469.1	7445.52	20494.7	17878.4	22347.8	14470.7	34397.3	11673.4	41708.6	19794.3	16337.1	24284	4493.71	41704.8	16662	19261.8	31975.9	18212.7	31485.6	36108.2	34944.7
M347T202	[M-H]-	Anacardic acid	0.433969	0.866411	0.323419	347.244	202.264	0.760395	HMDB0029683	C10759	Benzenoids	Benzene and substituted derivatives	Benzoic acids and derivatives	208.748	7	7	41445.9	36478.6	29756.9	31784.2	39775.4	35620.8	27375.2	43014.4	33259.4	38539.7	59079.4	30955.5	43890.5	52204	54099.8	10630	45584.4	78318	39296.9	70222.9	41086.7	33550.2	39876.6	31754	49805.7	34847.2	48072.9	23871.3	27861.4	36613.9	108651	53247.2	30101.6
M457T51	[M-H]-	Andrastin c	0.346897	1.04585	0.867143	457.264	51.137	4.73045			Lipids and lipid-like molecules	Steroids and steroid derivatives	Steroid esters	60.02	4	7	49040.2	93247.6	13072.1	45425.1	39337.4	13856	77753.6	78979.8	30897.4	61655.1	57539.5	101250	52469.5	43509.8	32832	50311.5	7217.42	48304.4	41537.3	49357.8	41937.2	52232.2	38382.9	43405.6	16735.4	74272.3	61494.2	49609.1	23645.4	68333.7	51110.4	46717.1	50802.4
M285T241	[M-H]-	Androstendione	1.88696	1.04601	0.798954	285.171	241.304	0.988923	HMDB0000053	C00280	Lipids and lipid-like molecules	Steroids and steroid derivatives	Androstane steroids	243.665	10	10	1.11742e+06	484900	1.19643e+06	1.06322e+06	748822	926174	653168	1.00817e+06	433245	967020	898839	983207	495818	1.08464e+06	738359	522787	1.06282e+06	1.06555e+06	832537	1.30767e+06	717069	1.0421e+06	733964	655003	2.21937e+06	602148	1.13514e+06	744922	710891	860751	957957	1.74094e+06	824748
M317T100	[M+HCO2]-	Arbutin	0.97039	1.01419	0.962845	317.106	100.439	3.82241	HMDB0029943	C06186	Organic oxygen compounds	Organooxygen compounds	Carbohydrates and carbohydrate conjugates	110.838	8	10	77944	753682	722230	225292	331846	127504	241332	248527	64710.7	214207	142745	199643	272496	341524	517860	192683	252515	225014	172943	348548	306111	278841	125467	237293	730470	211830	229984	188733	251058	20006.7	315261	282942	189929
M288T290	[M-H]-	Arg-asp	0.331595	0.885148	0.601332	288.156	289.654	2.18516			Organic acids and derivatives	Carboxylic acids and derivatives	Amino acids, peptides, and analogues	297.878	10	10	11524.2	16465.1	13173.3	26803.3	16413.5	43893.7	20093.7	24747.1	14920.4	34509.6	31244.7	7381.37	6327.07	27291.3	14332.4	20867.7	30442.7	28881.2	8536.24	45701.3	11082.9	23225.4	10821.6	6404.26	53844.9	12570.7	13022.2	35439.5	11017.3	27753.7	12122.9	32980.7	14687.4
M435T216	[M-H]-	Artocaprin	0.290764	0.942974	0.680367	435.156	216.048	7.60564	HMDB0030849		Phenylpropanoids and polyketides	Flavonoids	Flavones	230.7	10	10	14299.2	7848.54	14144.2	24479.7	10131	23729.4	20477.2	24790.7	16269.1	24665.7	20113.7	15170	15819.9	14464.5	25315.6	20506	22125.8	19416.7	22840.4	18334.2	21669.6	13828.1	23612.6	25206.2	12155.3	16831.4	13142.4	27700.7	20946.4	16817.5	27886.6	23225.9	22217.7
M441T104	[M-H]-	Ascorbyl stearate	0.725594	0.708205	0.425091	441.301	104.45	1.659		C20340				125.258	10	10	48170.7	290806	51535.6	40960.5	115008	35428.2	236534	104282	77342	128260	65693.7	361131	127943	89550.3	131585	85037.6	96145.5	36700.2	59956.7	164697	77195.8	89167.6	48000.4	127458	46441.3	105527	53876.9	43453.9	67074	50703.8	82276.8	56475.2	53616.8
M523T61	[M+Cl]-	Asiatic acid	1.09539	1.3925	0.354588	523.305	61.1255	1.09152	HMDB0035782	C08617	Lipids and lipid-like molecules	Prenol lipids	Triterpenoids	72.4	10	9	167829	200591	86607.5	308291	96168.6	320877	245618	633047	82651.6	193476	530200	178952	275159	618263	325826	418423	423845	503191	215729	708139	387445	206870	273278	235190	489598	311792	155238	189474	235378	386247	315809	177749	187981
M958T291	[M-H]-	Asiaticoside	0.219393	1.25052	0.397257	957.51	291.437	3.25051	HMDB0036656	C15428	Lipids and lipid-like molecules	Prenol lipids	Terpene glycosides	295.596	9	10	7258.46	2445.04	6964.96	6152.36	4069.33	2622.75	4961.66	2647.43	1096.67	4002.32	2134.04	1774.18	2066.05	2353.32	1350.39	5236.97	4272.8	2707.94	2099.36	2160.73	2270.68	2893.43	1860.82	2169.22	9132.29	1071.8	15013.5	4544.56	1436.19	7907.48	1541.85	3001.42	4236.92
M188T271_2	[M-H]-	Asn-Gly	0.474678	0.794481	0.598857	188.093	271.483	1.08722			Organic acids and derivatives	Carboxylic acids and derivatives	Amino acids, peptides, and analogues	284.477	10	10	59710.3	13730.6	100102	31810	80710.9	23353.8	43361.1	45885.5	9215.65	38367.9	60492.7	42907.4	9780.2	71875.7	205201	23396.5	23666.1	13923	19656.4	128640	24079.9	30139.4	53613.6	13482.2	40800.7	8864	32294	24156.8	9757.19	18454.9	13131.9	33728.3	20182.6
M228T374	[M-H]-	Asn-Pro	0.164474	0.791635	0.545665	228.088	373.707	1.49123			Organic acids and derivatives	Carboxylic acids and derivatives	Amino acids, peptides, and analogues	382.352	8	8	26539.5	10758.8	27883.5	7507.42	18195.8	3934.32	9607.63	4140.23	14597	10657.5	7585.22	12004.9	3938.03	9371.19	9766.83	5013.94	6944.91	6622.11	3806.88	4553.69	5271.83	6705.15	6689.05	4409.38	4324.93	6537.27	13766.5	8521.72	6489.4	8340.11	4535.15	11585.3	2565.25
M131T201	[M-H]-	Asparagine	0.423585	1.89433	0.139174	131.009	200.522	0.466061	HMDB0000168	C16438	Organic acids and derivatives	Carboxylic acids and derivatives	Amino acids, peptides, and analogues	206.487	9	8	1851.52	17762.6	11047	3073.47	10575.8	878.868	112470	30172	15293.9	4407.29	1322.76	1226.99	591.851	971.782	10158.1	958.91	19140.4	913.541	17294.6	2393.42	674.508	955.375	4237.05	20479.5	17918.5	11503.4	1983.37	2201.37	15287.6	708.107	13556.1	1538.53	857.552
M132T407	[M-H]-	Aspartic acid	0.232792	0.854989	0.785088	132.03	407.43	0.832621	HMDB0000191	C00049	Organic acids and derivatives	Carboxylic acids and derivatives	Amino acids, peptides, and analogues	414.434	9	10	25943.1	15724	67684.9	9428.2	74094.2	5824.55	3385.2	7096.37	15083.4	6292.66	7959.18	13043	4775.53	13134.2	5913.71	3023.05	2158.2	4226.87	3009.43	15062.4	2723.82	2801.15	1772.68	1589.26	16135.1	2024.33	9468.21	10131.6	1490.79	5602.74	3291.85	11265.4	532.089
M397T336	[M-H-C7H12O4]-	Atorvastatin	0.191398	0.992243	0.936361	397.187	336.151	2.73455	HMDB0005006	C06834	Organoheterocyclic compounds	Pyrroles	Substituted pyrroles	341.563	10	10	8333.22	12291.8	11324.9	12918.6	11420.3	14053.1	8693.01	12514	11742.3	14599.6	8702.38	8151.88	9572.76	8142.39	11547.9	8818.73	10172.1	13704.6	11747.3	10272.8	11705.5	12631	8391.37	13043	14555	10441.1	11466.8	13684	13595.4	10416.5	17287.6	13025.6	8811.57
M283T61	[M-H]-	Avocadyne	0.564494	1.14017	0.332353	283.228	61.375	9.82909	HMDB0035473		Lipids and lipid-like molecules	Fatty Acyls	Fatty alcohols	67.37	9	9	26279.8	43283.6	53538.5	66832.2	42479.6	45735.9	39996.6	79512.7	51274.1	42239.6	56796	48543.5	65100.4	50928.5	48000.5	34903.7	53602.3	64717.1	28303.7	32433.9	55777	33246.5	62143.1	32625.3	39285.1	51483	54300.2	26647.9	24646.4	42505.8	65076.5	29690.6	25202
M187T344_2	[M-H]-	Azelaic acid	2.71023	1.3001	0.303695	187.098	344	0.831646	HMDB0000784	C08261	Lipids and lipid-like molecules	Fatty Acyls	Fatty acids and conjugates	349.402	10	10	549422	128858	621117	851224	369410	526464	230250	1.04658e+06	150833	463644	432362	231388	163925	489187	915637	414645	411937	514754	405789	572477	392517	296730	729133	275765	441595	396407	597930	454504	333765	336445	899777	406443	343197
M469T245	[M-H]-	Bazedoxifene	0.240427	0.733986	0.103982	469.267	245.377	1.01122			Organoheterocyclic compounds	Indoles and derivatives	Indoles	250.337	8	5	3951.32	6740.77	5345.59	4955.4	5025.41	3931.05	1438.39	6141.39	7273.74	6369.5	5148.65	1978.39	11696.5	2738.51	4511.18	11426.9	3504.01	2013.32	2428	4291.77	3931.4	3617.75	3832.17	3484.08	16718.5	1675.75	4003.51	5477.1	4557.85	6973.01	3261.19	8693.02	2253.35
M170T156	[M-H-C2O3]-	Benazolin	0.637083	1.66026	0.170539	169.992	156.443	2.574		C18775	Organic acids and derivatives	Carboxylic acids and derivatives	Amino acids, peptides, and analogues	166.503	10	10	5039.29	9327.2	10555.1	44209	5722.19	32919.6	20347.9	30169.8	7536.16	21330.4	20941.5	44104.6	1832	8435.51	8232.85	25564.9	15619	15785	23613.5	3106.72	24620.5	20858.2	10336.9	26866	4201.66	1928.43	9187.53	32384	10751.1	22721.4	1220.44	21784.9	22425.5
M409T89	[M-H]-	Bensulfuron-methyl	0.536838	1.37426	0.654363	409.081	88.614	0.53377		C10937	Benzenoids	Benzene and substituted derivatives	Benzoic acids and derivatives	100.08	7	6	11834.1	15064.6	118075	8208.77	38341.3	18149.4	53097.5	19213.8	14089.9	31353.1	22553.4	6341.69	20688.7	43626	140321	17695.3	17434.5	16360.5	2312.89	46480.7	6520.74	18182	30649	3969.65	4377.26	18228.3	1438.57	14227.7	15732.2	18870.8	20809.3	15134.2	8573.94
M248T127	[M-2H]2-	Benzenesulfonic acid, dodecyl(sulfophenoxy)-	1.06612	2.61508	0.353943	248.081	127.41	6.14915			Benzenoids	Benzene and substituted derivatives	Diphenylethers	136.896	9	7	21768.9	48442.9	635733	20495.7	14666.6	50561.2	33090.7	21680.5	6747.54	44386.6	25233.7	26005.9	53974.4	50103.1	50770.7	26868.3	22877.2	52546.5	31316.7	28380.3	13200.2	20511.5	8917.16	25352.1	20891.7	36730.1	44844.2	19407.6	43421	9213.25	26471	45375.4	33040.8
M238T224	[M-H]-	Benzo[h]quinoline-3-carboxylic acid, 1,4-dihydro-4-oxo-	0.166949	0.936163	0.696839	238.038	224.209	2.63917			Organoheterocyclic compounds	Quinolines and derivatives	Quinoline carboxylic acids	227.224	8	8	14626.3	5098.35	9332.02	17801.7	5293.52	14565.1	11861.6	10978	10008.4	11168.7	10922.1	14288.7	10992.1	8690.13	15079.9	9546.55	9998.46	16206.5	6201.41	5395.34	13567.7	7140.11	12489.5	8711.15	5415.99	10407.4	9912.13	9504.27	8692.22	8398.72	16484.1	16414.2	9662.98
M121T123_2	[M-H]-	Benzoic acid	1.5135	1.09004	0.841062	121.029	123.094	0.55051	HMDB0001870	C00180	Benzenoids	Benzene and substituted derivatives	Benzoic acids and derivatives	128.226	10	10	588131	319330	2.0298e+06	229750	1.00834e+06	371270	763981	384716	178471	188445	298564	292131	213637	304596	551953	237085	329513	211778	158687	354042	166221	289426	165838	113356	219718	111164	765316	181444	365610	237726	499019	587847	202987
M364T160	[M-H]-	Benzoic acid, 2-hydroxy-4-[[2-[[(4-methylphenyl)sulfonyl]oxy]acetyl]amino]-	0.125331	1.03296	0.879501	364.061	159.571	1.4973			Benzenoids	Benzene and substituted derivatives	Benzoic acids and derivatives	173.875	8	9	9502.07	8442.62	8434.31	13031.5	8227.77	15762.9	14969.7	17791.5	18364.6	9580.05	18910.1	13388.4	20745.6	9618.4	20811.3	12348	23219.7	19536	15460.6	11302.5	12711.7	9918.9	11305	22042.8	2427.36	17610.2	2874.15	7028.2	18361.4	13555.9	24533.9	6353.87	16597.1
M630T163	[M+Cl]-	Benzoic acid, 3-[[(3-carboxycyclohexyl)amino]carbonyl]-4-[3-[4-[4-(cyclohexyloxy)butoxy]phenyl]propoxy]-	0.184229	0.906996	0.604293	630.285	162.738	2.2397			Organic acids and derivatives	Carboxylic acids and derivatives	Amino acids, peptides, and analogues	178.37	9	9	6096.01	17269	4371.87	13528.5	9691.39	13020.9	16233.2	11453	10909.8	22912.9	18994.7	12718.2	26600.7	12274.6	18597.5	13072.5	19549.3	9559.19	10587.8	6901.94	19345.7	15225.6	7527.87	27368.7	13278.9	14893.4	5502.7	14847.7	16718.6	19962.4	18202.7	14376.8	20444.5
M544T295	[M-H-CO2]-	Benzoic acid, 3-[[(3-carboxycyclohexyl)amino]carbonyl]-4-[3-[4-(4-phenoxybutoxy)phenyl]propoxy]-	0.0706665	0.908778	0.554721	544.258	294.791	2.30992			Organic acids and derivatives	Carboxylic acids and derivatives	Amino acids, peptides, and analogues	299.075	10	9	2433.38	4003.57	4107.98	5612.52	4664.41	6400.96	6802.6	5038.84	2675.95	6867.67	4881.32	11063.1	5101.58	3966.14	9784.26	6863.6	3998.3	5825.85	5698.32	6495.31	5002.81	2766.51	7801.73	4990.24	7087.18	6716.9	2897.45	7039.92	5176.85	7255.2	8294.31	6362.5	2927.65
M453T63	[M-H-H2O]-	Benzoic acid, 4-[[(1r,2e,4e,6z,9z)-1-[(1s)-4-carboxy-1-hydroxybutyl]-2,4,6,9-pentadecatetraen-1-yl]thio]-	0.632893	0.976402	0.911606	453.232	62.946	0.874915			Lipids and lipid-like molecules	Fatty Acyls	Fatty acids and conjugates	74.469	9	8	114988	196566	66855.7	114640	111250	89021.8	121488	109614	52112.5	99071.5	97892.3	184027	194358	57559.9	54778.1	103700	108235	60748.8	146784	56555.3	108541	177313	31887.3	130722	42551.6	77685.8	76779.2	93497.9	99070.8	191129	132998	89500	76585.4
M549T345	[2M-H]-	Benzoylnorecgonine	0.0902698	0.876115	0.520623	549.217	344.996	1.29793			Benzenoids	Benzene and substituted derivatives	Benzoic acids and derivatives	355.636	9	8	2644.27	3206.29	4024.08	4184.1	5271.17	1092.92	2538.47	1677.82	7481.32	3715.32	1268.79	1891.45	1908.4	3418.49	3163.45	4502.25	3087.48	2749.66	3502.77	949.128	1908.79	3406.28	1946.56	2107.59	2492.72	2458.92	3009.92	4118.98	2828.52	7142.26	3421.68	3625.8	2539.87
M615T227	[2M-H]-	Bestatin	0.143407	0.79072	0.167371	615.352	227.306	1.4193		C00732	Organic acids and derivatives	Peptidomimetics	Hybrid peptides	229.689	8	6	3394.66	10966.8	7829.08	7485.29	10235.9	7631.29	6950.27	11431.1	12023.7	10888	3559.26	15254.1	12644.5	15343.7	4925.43	2700.49	10881.8	15756.9	15082.9	21971.7	11915.3	4498.13	12184.4	5431.97	17073.9	7518.22	4879.4	15201.5	6824.71	7563.99	12168.5	8577.82	3840.57
M500T389	[M-H-H2O]-	.beta.-d-glucopyranosiduronic acid, 4-[3-(1-naphthalenylcarbonyl)-1h-indol-1-yl]butyl	0.654703	1.61437	0.217944	500.167	388.798	0.939037			Organoheterocyclic compounds	Indoles and derivatives	Naphthoylindoles	391.643	9	8	12222.7	5180.01	6929.53	59127.3	4231.81	39011.8	19187.8	41465	6825.79	32019.8	13772.6	26769.7	5208.5	39034.8	21982.7	21019.6	21112.9	36852.3	8673.95	60565.5	18321.4	6760	25194.7	17286.7	23956.2	5432.21	7553.53	29726.2	13636.9	22368.6	11563.7	5421.45	16297.1
M215T62	[M-2H]2-	.beta.-estradiol 3,17-disulfate	0.537801	0.975851	0.885496	215.038	61.824	4.27342	HMDB0041620		Lipids and lipid-like molecules	Steroids and steroid derivatives	Sulfated steroids	82.894	10	9	44124.8	12781.8	69486.2	67627.3	53395.8	52757.1	46986.4	72825.7	38935.2	35036.8	61886.5	40643.6	52052.9	50042.9	68105.8	62659	74036.6	71697.6	48328.3	49969.7	50174.7	35094.6	44252.6	57662.9	32593.7	29139.6	25234.1	44293.5	35689.4	39492.9	74142.4	40896.7	55017.3
M103T120	[M-H]-	Beta-hydroxybutyrate	0.831016	1.52663	0.19728	103.055	119.902	0.37013	HMDB0000011	C01089	Organic acids and derivatives	Hydroxy acids and derivatives	Beta hydroxy acids and derivatives	128.226	10	10	14171.1	66868	109656	76107.1	69473.9	21705.5	69478.4	70356.8	3447.49	31569.6	49360.1	41011	6852.87	14640.3	40974.3	29238.4	28094.7	23746.8	54585.5	19877.5	48681.6	26885.7	13294.2	64166.4	10950.1	7880.12	78036.3	63264.5	27579.8	75377.9	4909.4	86700	34463.7
M153T27	[M-H]-	.beta.-resorcylic acid	1.09102	0.900513	0.683568	153.019	26.833	1.32382	HMDB0029666		Benzenoids	Benzene and substituted derivatives	Benzoic acids and derivatives	28.741	10	10	385117	30961.7	120561	113221	122268	173617	115605	87378.6	84738.1	72512.2	229195	44878.3	21028.4	313443	190960	160802	201959	174689	69345.5	219268	109886	91007.8	204287	86269.3	351298	13180.2	133735	96549.3	50103.4	142815	80051.7	144845	149330
M356T82	[M-H]-	Butachlor esa	1.5905	0.484529	0.210814	356.154	82.2475	2.19278			Benzenoids	Benzene and substituted derivatives	Anilides	97.97	9	7	36258.2	24899.8	21262.7	135519	24331.6	131342	211218	66464.4	20000	309738	389611	325560	53589.6	151399	144398	49279.3	48800.5	80799.6	440680	42733.7	138639	144499	58071.1	31191.9	71315.8	24111	25207.6	59568.4	47285.6	109235	253565	559510	102005
M87T119_2	[M-H]-	Butanoic acid	3.34535	0.659592	0.336081	87.045	119.334	3.75742	HMDB0000039	C00246	Lipids and lipid-like molecules	Fatty Acyls	Fatty acids and conjugates	129.768	10	10	740804	410516	95194.8	453486	511947	518869	382600	412682	895887	263605	8.33255e+06	374991	729882	3.03306e+06	448530	680889	862472	1.0487e+06	388134	1.85625e+06	476154	947313	234409	271777	2.30338e+06	366930	1.09512e+06	327034	296815	931398	933151	901861	386827
M439T28_2	[M-H]-	Candesartan	0.130141	0.717054	0.283084	439.145	27.597	2.15333	HMDB0014934	C07468	Benzenoids	Benzene and substituted derivatives	Biphenyls and derivatives	35.496	7	8	8594.29	6233.65	5996.82	15855.4	37515.7	24634.9	20304.9	13190.3	13881.6	17859.3	31309.3	22124.4	30102.9	18928.3	8734.1	217103	20207.2	10048.5	15796.6	40186.6	38725.9	11716.2	18238	9747.8	10165.5	21399.9	33289.6	19432.1	8932.97	121823	26651.1	16090.4	13296.8
M115T82_2	[M-H]-	Caproic acid	2.3167	1.20573	0.344304	115.076	81.587	2.54843	HMDB0000535	C01585	Lipids and lipid-like molecules	Fatty Acyls	Fatty acids and conjugates	99.36	10	10	171389	146481	624596	693720	386253	589966	347424	976293	328739	467302	817398	393863	337119	869765	866043	580447	523295	676363	632829	611905	431526	343343	405073	352264	333598	436790	506144	492432	386350	392328	844269	440803	598934
M299T251	[M-H]-	Carbazochrome sulfonate	0.345826	0.829685	0.16853	299.044	251.019	1.3957						254.178	10	10	60734.2	49866.4	39094.2	27574.4	48075.8	47456.7	32632.4	42666.6	84438.5	44077.1	41199.1	42134	60994.2	47626.9	49973.9	39256.7	52326.9	50297.6	38589.7	61503.7	34588.8	33800	46276.2	46821.1	51581.8	59919.9	54590.9	27006.1	48214.1	29340.1	83807.1	51445	31897.2
M272T109	[M-H]-	Carprofen	0.348882	0.944338	0.936368	272.06	108.702	3.13752	HMDB0014959	C18364	Organoheterocyclic compounds	Indoles and derivatives	Carbazoles	119.447	10	9	252794	113101	2.41108e+06	205281	320387	109173	143542	165202	47292.2	272318	352391	1.36917e+06	55233.1	218363	1.04587e+06	141574	112429	108008	394890	331735	311411	296224	238837	68369.9	61170.5	65336.9	290751	75733.2	57006.6	245783	398807	1.47095e+06	177749
M358T398	[M-H-CH3]-	Casticin	0.13829	1.28665	0.222254	358.056	398.021	2.50082	HMDB0030660		Phenylpropanoids and polyketides	Flavonoids	O-methylated flavonoids	400.63	9	10	9465.5	4363.84	5558.05	6076.01	5292.83	7304.39	3833.46	4244.88	2764.1	4269.85	5271.36	4672.16	2508.52	6139.62	3611.74	4131.36	5588.06	5248.83	3846.28	7742.11	3010.23	4228.5	6636.06	3573.84	11543.3	3838.75	8316.6	5344.59	2484.32	5293.29	3695.4	10876.2	4394.36
M405T36	[M-H-CO2]-	Celastrol	0.58704	0.977446	0.912023	405.3	36.022	0.278211	HMDB0002385		Lipids and lipid-like molecules	Prenol lipids	Triterpenoids	38.146	8	9	38094.7	80230.3	95518.9	41202.8	112594	46925.7	34469.3	38990.8	135501	49857.5	65881.9	62082	93810.6	30789.3	30885.7	52243.5	65070.7	61133.4	60259.8	68010.2	59599.2	54185.4	47850.4	44653.3	72536.7	70239.5	84408.9	30993	54020.1	38221.9	58393.7	58203.2	39884.4
M380T34_2	[M-H]-	Celecoxib	0.333147	0.958786	0.850679	380.081	34.046	2.72735	HMDB0005014	C07589	Organoheterocyclic compounds	Azoles	Pyrazoles	58.133	7	9	32821.2	15898.8	19833	34440.8	9253.94	44438.5	26586	43267.9	14963.2	55779.4	32653.8	12013.2	17346.9	42198.5	42097.5	24282.3	25740.2	31206.6	27249.6	27061.4	54697.7	14853.8	32456.4	192270	14426	29641.9	14875.1	58947.9	44557.8	30990.5	33523.2	34612.3	16803.7
M683T391	[2M-H]-	Cellobiose	1.5562	3.49994	0.289321	683.226	390.657	2.11729	HMDB0000055	C06422	Organic oxygen compounds	Organooxygen compounds	Carbohydrates and carbohydrate conjugates	394.851	10	5	3288.75	2273.73	2537.08	545532	3127.87	116238	11678.6	95463.9	2625.52	57937.3	5691.89	46952.1	1961.3	23692.4	24890.3	32876.8	20914.8	240557	3409.3	598956	30215.9	2590.46	99125.6	28940.3	29209	2460.76	2360.69	179788	14135.2	43098.5	15944.8	3017.17	21032.4
M563T34	[M-H]-	Cer(d18:1/18:1(9Z))	1.00987	1.11788	0.75006	562.521	34.0225	1.85009	HMDB0004948	C00195	Lipids and lipid-like molecules	Sphingolipids	Ceramides	41.149	8	9	52183	180529	107671	35769.1	163933	48136	49424.6	32697.6	76106.3	102653	36014.5	116899	49188.6	22377.5	25473	46425.5	33518	31526.7	52881.8	37297.9	27368.5	69842.4	9613.07	38186.5	15981.2	57867.4	101765	34533	51766.4	46044.8	35601.6	43340.5	50947.3
M597T34_1	[M+CH3COOH-H]-	Cer[ns] d34:1	0.548574	0.920352	0.597067	596.525	34.414	2.771			Lipids and lipid-like molecules	Sphingolipids	Ceramides	42.769	7	9	66623.5	131016	32204.9	81479.2	77893.2	79480.1	95703.7	82910.7	129061	76723.8	70530.6	109195	81781.7	36300.1	68236.8	71189.2	70451.3	85927.1	90269.3	43762.8	73342.1	109995	51010	55381.9	58991.9	126810	47225.9	105475	91015.2	124225	75925.4	91160.9	63077.7
M387T305	[M-H]-	Cetirizine	0.318823	1.7145	0.189546	387.166	305.275	0.273866	HMDB0005032	C07778	Benzenoids	Benzene and substituted derivatives	Diphenylmethanes	311.023	9	7	5842.73	3161.76	37058.8	23934.1	25001.8	19899.2	9062.35	17727.2	5019.32	8035.18	3831.7	7983.76	4185.14	14049.8	11640.1	48548.3	4158.05	9580.84	6663.49	18715.8	8298.29	4244.19	19229.8	3173.56	10529.7	4427.85	4656.96	30914.1	3945.87	6357.37	5443.71	3954.19	8660.21
M784T159	[2M-H]-	Chenodeoxycholate	7.16924	0.221014	0.134035	783.58	159.472	2.63388	HMDB0000518	C02528	Lipids and lipid-like molecules	Steroids and steroid derivatives	Bile acids, alcohols and derivatives	163.414	10	10	4771.04	1.29149e+06	3350.98	95456.8	795899	97520.6	304728	478579	1.91878e+06	893079	315510	3.08864e+06	8.64979e+06	159993	213289	292524	285441	266943	811365	221303	1.03828e+06	240007	219894	756872	133266	887151	13276.2	270593	943207	573357	4.43659e+06	1.22033e+06	155847
M465T27_6	[M-H]-	Cholesteryl sulfate	19.962	0.929921	0.615714	465.304	26.516	2.01637	HMDB0000653	C18043	Lipids and lipid-like molecules	Steroids and steroid derivatives	Cholestane steroids	28.741	10	10	4.90824e+07	1.08785e+08	5.55342e+07	7.785e+07	8.30435e+07	5.77857e+07	8.38295e+07	8.62319e+07	1.07263e+08	8.68033e+07	7.58644e+07	1.16795e+08	9.87767e+07	4.4995e+07	2.80596e+07	6.82063e+07	6.03726e+07	6.68653e+07	1.05961e+08	4.36718e+07	8.35222e+07	7.30358e+07	5.09698e+07	7.42644e+07	5.59982e+07	8.87895e+07	6.40343e+07	6.31485e+07	8.20165e+07	7.32014e+07	1.05006e+08	8.56384e+07	6.03117e+07
M225T344	[M-H]-	Chorismic acid	0.257777	1.15072	0.516786	225.053	343.661	0.617131	HMDB0012199	C00251	Organic acids and derivatives	Carboxylic acids and derivatives	Dicarboxylic acids and derivatives	362.7	10	10	23029	6269.09	23315.3	16289.4	15058	10783.7	8659.66	21513.3	4881.19	9187.61	15710.4	9709.65	7267.56	17836.3	26534.9	11046.8	9166.37	10708	8241.7	20042.6	11760.1	7509.66	22554.4	6692.22	14631.9	12468.1	18593.1	8011.23	7378.62	11710.5	18348.7	10486.6	7801
M293T26	[M-H]-	Cinchonine	1.54263	0.867021	0.701373	293.179	26.227	1.81355	HMDB0030282	C06528				28.171	10	10	342926	244925	228140	296971	257892	699136	253396	405097	274979	470155	347560	261072	611666	1.73223e+06	353460	283833	427288	661368	302310	291099	330014	313889	353462	540001	523019	335357	614392	346061	333911	315233	418792	221138	454745
M204T184	[M-H]-	Cinnamoylglycine	2.01486	0.678217	0.651436	204.067	184.014	2.15755	HMDB0011621		Organic acids and derivatives	Carboxylic acids and derivatives	Amino acids, peptides, and analogues	188.638	8	9	20542	9975.31	174349	21913.9	93060.1	7448.7	184189	13769.3	33315.2	126441	37110	52291.6	6265.51	129097	892395	34268.2	14981.9	10456	13504.7	271306	19264.5	43650.1	374022	7765.59	14608.7	7199.67	39380.1	21903	9478.37	13098.5	7090.34	19709.5	25422
M487T279	[M+FA-H]-	Cinobufagin	10.34	0.564333	0.157081	487.237	279.449	0.479119		C16931	Lipids and lipid-like molecules	Steroids and steroid derivatives	Steroid lactones	281.376	10	10	192251	7.30541e+06	761085	5.81769e+06	4.48545e+06	1.6625e+06	7.79652e+06	166094	7.98439e+06	9.37258e+06	5.09702e+06	1.79811e+07	1.13389e+07	433010	543888	4.50724e+06	195328	36318	1.116e+07	159084	5.32981e+06	9.00846e+06	120030	490744	110338	4.81896e+06	32645	2.86366e+06	1.8222e+06	1.23626e+07	1.31357e+07	1.02515e+07	322852
M331T46	[M-H]-	Cis-7,10,13,16-docosatetraenoic acid	1.66857	0.760441	0.14834	331.264	45.895	1.92575	HMDB0002226	C16527	Lipids and lipid-like molecules	Fatty Acyls	Fatty acids and conjugates	47.195	10	10	135809	434668	230362	279305	453891	210971	520544	388062	897328	510203	367454	671674	491375	487713	673330	321807	232507	287163	509288	294121	293292	515914	172025	312725	213207	742736	181182	405605	225143	366928	623269	319574	229058
M129T192	[M-H-CO2]-	Cis-aconitate	0.511329	1.01363	0.960407	129.019	192.033	1.70925	HMDB0000072	C00417	Organic acids and derivatives	Carboxylic acids and derivatives	Tricarboxylic acids and derivatives	200.801	9	9	20125.1	9252.31	18017.7	38579.9	15577.4	35111.7	16289	68727.4	17491.7	22685.9	20819.8	13808	9191.05	60269.8	28083.7	42461.4	19750.8	31315.6	18307.3	62604.9	22467.2	17764.6	21706.5	41419.6	54039.4	11119.7	21579.7	36570.1	23642.2	22611.9	12269.1	28416.5	41558.6
M141T357	[M-H]-	Cis,cis-muconic acid	1.06503	0.778566	0.405403	141.017	357.174	0.523826	HMDB0006331	C02480	Lipids and lipid-like molecules	Fatty Acyls	Fatty acids and conjugates	361.131	10	10	3.96584e+06	326013	1.23987e+06	260944	981940	350650	1.03854e+06	384247	734236	543603	1.45604e+06	477347	571608	627854	1.07884e+06	748821	268347	284262	285334	923401	448526	396228	1.11635e+06	268061	760495	397557	436760	202487	261589	230628	1.05338e+06	269468	532374
M379T219	[M-H]-	Clausarin	0.86204	1.03541	0.865779	379.212	218.529	1.99772			Phenylpropanoids and polyketides	Coumarins and derivatives	Pyranocoumarins	223.276	10	10	121674	63000.9	67274.3	208013	53788.2	149465	144588	192644	92578.2	116475	142597	179293	116257	173689	99912.1	150278	160504	215051	86895.2	136772	377918	90954.4	95480.1	133754	229232	107180	83617.6	181491	201936	239980	149686	52123.6	89501.3
M389T350	[M-H]-	Clofibric acid acyl-.beta.-d-glucuronide	0.113082	1.03109	0.918382	389.072	349.522	5.56528			Organic oxygen compounds	Organooxygen compounds	Carbohydrates and carbohydrate conjugates	374.591	6	7	1707.43	7821.41	8231.1	7738.91	3006.25	8027.7	5779.21	4232.65	9256.58	3100.54	3886.04	4561.6	6584.65	19026.1	6222.15	3191.43	3772.24	6051.3	4497.42	12574.5	7529.86	7686.3	7726.11	4394.61	4890.36	3650.82	4447.2	4289.79	6200.35	2768.83	11426	6274.55	7665.26
M531T146_2	[M-H]-	Cochlioquinone a	2.86232	0.903877	0.754767	531.299	145.868	0.524597						155.766	10	10	1.21179e+06	2.56148e+06	496843	1.28207e+06	733478	543640	2.12536e+06	2.43154e+06	1.90681e+06	1.55818e+06	1.21947e+06	4.03329e+06	4.61535e+06	984992	1.7248e+06	1.36002e+06	1.10216e+06	1.05966e+06	2.43874e+06	1.38711e+06	2.85639e+06	1.0806e+06	399313	1.22802e+06	1.02998e+06	4.80883e+06	552652	1.03689e+06	2.19639e+06	3.35818e+06	2.699e+06	996042	796752
M162T264_2	[M-H-CH3]-	Coniferyl aldehyde	1.56714	0.936839	0.812635	162.056	264.335	0.27984	HMDB0141782	C02666	Benzenoids	Phenols	Methoxyphenols	279.131	10	10	17279.4	92958.8	44164.3	436870	82118.2	546075	431474	434928	210948	520573	434524	309744	263884	276255	522341	434358	598150	522600	314388	321407	517603	206601	616684	534925	287637	196413	33979.5	467591	493408	305631	744117	381847	325357
M609T335	[M-H-CO2]-	Coproporphyrin i	0.10903	1.07528	0.625965	609.293	334.707	0.247137	HMDB0000643	C05769	Organoheterocyclic compounds	Tetrapyrroles and derivatives	Porphyrins	338.723	10	8	4354.86	6412.66	2662.69	5703.71	2795.31	3546.03	4864.83	5416.88	5693.54	4419.79	3037.22	7480.68	5284.18	3057.88	3743.34	5363.72	5958.15	3851.74	3095.99	3638.67	5535.49	3657.23	4560.36	4672.1	3620.54	5577.75	1993.4	4228.89	6480.91	5127.37	8762.48	4171.51	3522.12
M345T313	[M-H]-	Corticosterone	1.20754	0.671612	0.23177	345.228	312.989	1.83295	HMDB0001547	C02140	Lipids and lipid-like molecules	Steroids and steroid derivatives	Hydroxysteroids	318.844	10	10	311158	167521	69530.6	24817.2	157829	29858.7	50360.3	67099.9	299904	52552.9	64855.9	127073	113614	50885.6	73456.3	74297.4	37671.4	43845	100406	92356.5	65263	42068.1	48021.1	47064	78269.7	75685.5	85586.4	31882.9	56508.5	49221.4	150573	125411	23486.4
M423T38	[M-H-H2O]-	Cortisol 21-sulfate	0.662142	1.12506	0.661959	423.169	38.2785	6.79537	HMDB0062779	C02822	Lipids and lipid-like molecules	Steroids and steroid derivatives	Sulfated steroids	55.921	7	5	27390.9	24636.4	26673.6	71307.1	25005.7	140332	82878	170648	33042.4	128600	63573.6	52446.9	115347	54198.2	121849	111309	67880.3	62434.4	107448	48884.1	250603	65745	105512	108827	41689.2	97079.1	21531.2	91816.6	118947	69869.7	301957	107361	103227
M130T274	[M-H]-	Creatine	1.79395	0.799722	0.569989	130.087	274.317	1.90798	HMDB0000064	C00300	Organic acids and derivatives	Carboxylic acids and derivatives	Amino acids, peptides, and analogues	284.334	10	10	256702	2.53905e+06	6.99431e+06	1.7268e+06	1.01958e+07	3.91011e+06	472340	4.4077e+06	1.13476e+06	1.5726e+06	1.00937e+06	686525	92485.1	4.40157e+06	1.64831e+06	357244	1.21021e+06	4.09904e+06	2.52595e+06	2.64656e+06	688616	2.85613e+06	938003	161392	6.75389e+06	339935	1.1189e+06	3.11829e+06	195167	1.37554e+06	274680	3.70435e+06	878523
M367T304	[M-H]-	Curcumin	5.74486	1.6898	0.348707	367.106	303.963	0.873964	HMDB0002269	C10443	Phenylpropanoids and polyketides	Diarylheptanoids	Linear diarylheptanoids	306.617	10	10	64886.6	37149	6660.88	3.30113e+06	383191	4.31849e+06	405500	2.50148e+06	5028.1	419574	108670	1.40432e+06	9679.58	1.99995e+06	1.16912e+06	781421	1.14312e+06	3.14596e+06	382052	2.81107e+06	1.02939e+06	56767	2.52611e+06	800069	1.40878e+06	15665.3	10593.9	3.80111e+06	615052	466830	404536	51708	1.36655e+06
M291T101	[M-H]-	Curvularin	1.58105	0.885937	0.664575	291.127	100.721	1.83212						124.759	10	10	145812	554052	99285.5	484825	565464	134030	606077	577314	81332.6	754472	284918	881386	607547	839786	575509	335645	282402	808363	190155	1.0528e+06	598712	629927	250163	359480	746846	568111	190820	217142	112862	440633	969845	617115	474055
M220T159	[M-H]-	Cyclohexylaminopropanesulfonic acid	0.968079	1.75961	0.384011	220.098	159.008	3.67279			Organic nitrogen compounds	Organonitrogen compounds	Cyclohexylamines	176.925	10	10	14922.6	21693.9	256912	27604.8	63004.6	21207.6	9090.55	29093.4	67730.6	13252	24879.4	11618.1	1224.33	59354.3	19354.6	11917	16594.9	35173.5	21570.1	50926.7	10537.1	37023.5	12184.1	6841.61	38145.5	4955.38	105849	16904.9	7820.62	14420.6	1631.2	24057.7	17111.7
M327T370	[M-H]-	Cyclopentanehexanoic acid, 2-[(2z)-4-carboxy-2-buten-1-yl]-3,5-dihydroxy-.gamma.-oxo-, (1r,2r,3s,5s)-	0.0784021	1.06701	0.573442	327.144	370.436	1.77866			Lipids and lipid-like molecules	Fatty Acyls	Eicosanoids	384.258	5	7	5776.46	3076.31	2563.09	3045.22	4267.5	3495.47	2835.41	4205.63	4415.5	4550.87	3835.94	5273.9	3324.38	3884.82	4889.43	3489.05	2854.25	2237.52	2284.25	1592	3360.07	3092.85	3036.31	3108.85	4278.77	4791.07	2952.54	3097.13	4936.84	3424.24	3626.34	2491.42	3949.13
M335T346	[M-H]-	Cyclopiazonic acid	0.135981	0.698819	0.113165	335.127	345.683	0.107464		C03032	Organoheterocyclic compounds	Indoles and derivatives	Indoles	357.432	4	4	3570.05	2571.41	3429.96	2213.15	4017.26	5677.33	3370.14	650.247	11132.2	6185.27	6121.77	3674.5	3395.01	3706.55	4367.86	3424.47	3403.47	3561.19	4026.26	1879.29	1739.34	4111.74	3270.25	4634.45	9653.44	3134.15	4568.44	6879.53	3311.87	3733.93	3856.42	3871.96	3164.8
M221T55	[M-H]-	Cystathionine	0.386196	0.938494	0.747817	221.085	55.022	1.12543	HMDB0000099	C02291	Organic acids and derivatives	Carboxylic acids and derivatives	Amino acids, peptides, and analogues	75.899	9	7	95038.2	128521	106477	183664	141502	183789	187775	74231.5	101080	188910	60068.9	126273	18459.9	163902	263138	321227	207652	119355	214712	237129	81826.5	134028	68555.7	210525	140515	230441	89142	76878.2	68437.2	231587	211740	165407	47969.4
M200T308	[M-H]-	Cysteine-s-sulfate	0.0753594	0.754785	0.45833	199.969	308.067	1.11719	HMDB0000731	C05824	Organic acids and derivatives	Carboxylic acids and derivatives	Amino acids, peptides, and analogues	312.434	10	9	4546.06	7062.52	12602.3	6684.77	23996.8	7783.18	4743.2	5749.5	6164.72	3402.34	2467.09	4928.75	1501.13	3923.94	10721.9	2235.96	1430.72	2916.2	4276.35	2537.2	2137.38	3065.31	7007.53	1102.92	4224.47	1435.81	3695.68	6104.86	418.707	2710.53	1227.8	8106.07	3113.65
M631T441	[M+OH]-	Cytidine-5'-monophospho-n-acetylneuraminic acid	0.382689	1.19038	0.738893	631.174	441.235	0.698671	HMDB0001176	C00128	Nucleosides, nucleotides, and analogues	Pyrimidine nucleotides	Pyrimidine nucleotide sugars	456.566	9	7	2927.99	3187.96	1519.74	27834.7	1417.79	42835.5	11560.8	15150.6	1955.27	12444.6	17084.5	4611.9	1369.59	5807.11	20389.8	12282	6483.4	14256.4	9666.2	15513.1	23195.2	5760.89	12260.5	5855.06	7164.06	1627.37	2036	30889.8	9671.54	15119.3	4165.58	7486.06	3956.56
M333T27	[M-H]-	Daidzein 4'-sulfate	1.73611	1.206	0.66857	333.008	26.906	1.99757			Phenylpropanoids and polyketides	Isoflavonoids	Isoflav-2-enes	47.829	10	10	868895	121615	652370	1.41574e+06	545991	403961	396581	314392	23895.9	420505	557609	535258	115053	1.0803e+06	662574	1.61442e+06	497126	578509	275893	1.17265e+06	646117	608901	911625	556057	1.14325e+06	80149.9	945153	769970	874650	483481	397348	513877	561644
M133T287	[M-H-H2O]-	D-arabitol	0.453045	0.997334	0.987802	133.05	287.483	2.80596	HMDB0000568	C01904	Organic oxygen compounds	Organooxygen compounds	Carbohydrates and carbohydrate conjugates	292.006	10	10	80003.5	102433	101886	103990	81863.4	83753.4	61819.4	95264.7	87560	72666.8	61327.6	59711.8	33043	128649	92598.5	49880.8	58300	81005.2	49279.7	95962.3	57837.8	39089.7	69067.5	42318.1	80939.1	28399.4	69125.9	77851.5	36043.7	48062.1	46416.6	52637.9	37801.9
M397T296	[M-H]-	Daunomycinone	0.524826	0.948662	0.884831	397.117	295.866	1.01649			Benzenoids	Naphthacenes	Tetracenequinones	298.834	9	7	3999.89	4600.74	5918.51	25645.6	10606.4	37192.7	19678	18871.4	6371.35	13746.9	16215.9	21097.1	5064.65	39955.7	53248.9	22138.4	25964.2	23793	10023.9	35690.9	22842.9	6312.34	43030.8	20532.9	22067	4820.96	3542.91	22258	14581.8	15596.7	12386.1	5173.03	19222.3
M539T51	[M-H]-	Defluoroatorvastatin	0.376848	0.931773	0.769246	539.27	51.119	0.840476			Organoheterocyclic compounds	Pyrroles	Substituted pyrroles	60.153	5	8	74961.9	234509	46853.6	94672.1	77169.7	40870.1	100301	83983.3	51397	87934.8	72484.9	231790	122081	104049	87014.1	88752.2	60500.2	81942.7	141117	71889.8	96846.7	82166.8	47621.8	103773	33873.6	16343.6	51398.3	87537.5	70695.8	113397	158017	72797.3	81864.1
M401T103	[M-H]-	Dehydrocholic acid	0.410774	0.914276	0.805386	401.233	103.355	3.22494		C13154	Lipids and lipid-like molecules	Steroids and steroid derivatives	Bile acids, alcohols and derivatives	105.287	5	7	481780	112739	275599	66232.4	224148	55984.9	22939.6	30603.7	63285.2	52271.4	28739	18766.2	40018.5	128555	74509.5	42010.2	48370.6	39900.5	40558	135879	48789.7	38553.6	110863	36896.3	44060.7	33016.7	325428	22713.1	31217.9	36926.2	61903.7	54083.2	13252.4
M266T374	[M-H]-	Deoxyguanosine	0.136231	0.931176	0.749923	266.079	373.88	2.85236	HMDB0000085	C00330	Nucleosides, nucleotides, and analogues	Purine nucleosides	Purine 2'-deoxyribonucleosides	376.87	9	10	8855.91	7361.39	12042.5	4911.83	10842.6	2792.67	4528.12	4242.16	6284.53	7804.28	3651.18	3630.97	3851.28	3756.78	5428.37	2209.83	3706.17	3589.03	3042.33	6545.95	3779.56	4906.81	3559.91	2272.34	7194.65	3405.3	9526.1	8065.48	2891.47	3074.29	3965.59	6530.22	2530.89
M251T182	[M-H]-	Deoxyinosine	0.437155	0.629384	0.384695	251.078	182.357	0.0993998	HMDB0000071	C05512	Nucleosides, nucleotides, and analogues	Purine nucleosides	Purine 2'-deoxyribonucleosides	188.638	10	9	18760.7	34705.7	7549.78	12413.8	213750	73222.1	14790.9	61515	15764.8	10977.5	53527.2	17290	9122.41	61630.1	131000	35464.5	41522.2	43324.6	27272.3	108406	28907.7	26619.5	58882.8	14251.1	27000.3	11365	9089.87	14402	15691.8	13095.3	21563.8	17517.6	21470.5
M471T435	[M-H]-	Deoxynivalenol 3-glucuronide	1.34547	1.77343	0.250487	471.136	435.223	0.814498			Lipids and lipid-like molecules	Prenol lipids	Sesquiterpenoids	438.982	10	10	67302.1	8951.5	43354.7	191518	13310.1	357562	54828.9	132812	9967.15	175779	52256.9	68041.6	9362.94	42585.1	114925	63935.6	52229	122807	55146	49145.7	272766	79976.8	102585	124468	24934	18437.6	35301.8	209847	38673.9	130864	13023.2	79907.3	77295.6
M585T205	[M-H]-	Desferrioxamine d2	0.781821	0.698666	0.138144	585.339	204.703	0.291282						210.107	10	10	48186.7	101851	20302.6	25538.5	49700.7	36163.4	110415	39855.9	96945.7	63327.1	37344.7	488613	85478.5	52012.4	75071.3	33369.9	27620	23941	54556.2	46165.4	48556.6	24948.5	43613.4	26639.4	15087.1	23746.6	32923.5	29780	38590.6	37060.6	85609.1	46268.1	24964.7
M352T307	[M+Cl]-	Desmethyleneparoxetine	0.357221	1.21172	0.37543	352.109	307.452	0.286466			Organoheterocyclic compounds	Piperidines	Phenylpiperidines	314.884	8	6	4538.34	6032.67	7711.03	20799.5	8890.36	16223.4	3824.31	13990.4	6178.99	5072.75	7181.09	8366.77	5425.76	10928.1	11747.9	5400.58	8916.31	14215	7164.58	16251.5	7540.99	2249.89	13401	4380.86	11288.2	4859.16	1989.29	19247.2	5930.74	6484.13	8928.89	9009.48	5762.8
M460T59	[M-H]-	(desmethyl)hydroxycerivastatin	0.848708	0.500878	0.0739072	460.201	58.507	3.19765			Organoheterocyclic compounds	Pyridines and derivatives	Phenylpyridines	70.402	10	8	79227.2	27806.1	4049.66	145576	30717.2	111394	373251	96314.4	19438.1	197001	52637.8	138405	108893	19281.3	167004	153746	76994.6	40764.6	122098	29705	54661.4	77169.5	152898	19718.7	21791.5	28335	21910.4	134136	128706	95449.4	228175	110714	32551.7
M439T151_2	[M-H]-	Desmethylverapamil	1.25944	1.15805	0.603805	439.247	151.065	2.53847			Benzenoids	Benzene and substituted derivatives	Phenylbutylamines	159.506	10	10	164802	586346	159261	370630	318710	950494	282467	537809	184580	363988	1.52326e+06	250842	507880	1.20429e+06	616892	625971	694642	715793	444331	1.33187e+06	727317	623123	511223	442615	1.40689e+06	575489	308393	332204	410520	589743	638002	366610	414598
M339T36	[M-H]-	Desmethylxanthohumol	0.670819	1.20791	0.580185	339.125	35.604	4.70844	HMDB0030610	C16416	Phenylpropanoids and polyketides	Linear 1,3-diarylpropanoids	Chalcones and dihydrochalcones	51.753	7	8	33781.6	163314	52195.9	32039.2	94262.7	14150.5	17078.9	42263.7	18276.8	59697.9	9803.92	69797.1	60110.6	8490.24	12252.2	29606.2	22549.4	44546.1	69721.9	78012.1	35419.1	146105	7238.36	29652.5	221553	83540.5	144599	32941.9	24683.4	61261.1	92482.3	75137.3	43205.5
M359T304	[2M-H]-	D-fructose	1.23361	2.05573	0.213561	359.119	304.094	1.0855	HMDB0062538	C00095	Organic oxygen compounds	Organooxygen compounds	Carbohydrates and carbohydrate conjugates	313.904	10	7	8633.02	7282.59	10410.8	133067	10278.5	187195	11616.4	141867	2287.19	16617.3	7655.44	43755.8	11937.4	54932.1	37142.9	24579.8	29803.4	105360	12946.9	106758	29000.2	4979.46	75368.5	24669.4	44666.7	11534.4	2380.4	158682	19939.2	12896.1	18878.1	16688.3	33525
M209T243_2	[M-H]-	D-glucarate	0.0829864	1.01012	0.945675	209.024	242.706	2.01398	HMDB0000663	C00818	Organic oxygen compounds	Organooxygen compounds	Carbohydrates and carbohydrate conjugates	245.236	10	8	12214.9	2122.62	2588.63	2467.62	3856.82	2679.69	1782.63	2725.83	1615.81	2598.79	2148.48	2113.61	703.661	2149.05	4139.22	1598.55	2665.49	2360.9	2018.56	2022.02	2074.39	1907.37	2507.09	2217	3147.4	3174.99	1417.98	1832.67	2226.8	2915.65	3106.11	3115.8	1978.71
M193T387	[M-H]-	D-Glucuronate	0.320044	0.878448	0.767799	193.035	386.546	1.69114		C00191				389.771	10	10	13910.4	8659.2	23597.9	25516	18664.9	14140	17198.4	11574.7	3493.05	20230.6	8595.92	10741.7	2176.65	15685.5	82177.5	9794.3	6804.5	9423.6	5271.71	78459.8	10745.7	8753.59	27866.5	8319.15	7609.75	2899.72	9781.94	16810.8	5760.21	10146.9	5638.71	12152.5	8603.67
M193T353	[M-H]-	D-glucuronic acid	0.119876	0.821758	0.740753	193.036	352.524	1.03071		C00191	Organic oxygen compounds	Organooxygen compounds	Carbohydrates and carbohydrate conjugates	363.581	5	8	5062.37	5691.2	37793.6	15458.8	24006	7689.78	11854	6969.34	4947	13118.8	7118.63	4295.04	3272.31	7036.4	84789	4972.47	3902.56	4162.39	3518.97	17932.3	6834.11	4919.82	16037.9	4327.19	4190.4	719.118	7791.26	7407.44	3787.99	7973.44	3225.36	6125.11	4804.97
M145T200	[M-H]-	D-glutamine	0.133392	0.84872	0.240919	145.041	199.707	2.50608	HMDB0003423	C00064	Organic acids and derivatives	Carboxylic acids and derivatives	Amino acids, peptides, and analogues	205.797	7	7	54068.5	12532.5	16476.2	15913.7	15283.2	13274.5	17316.5	17323.9	14925.7	18789.8	13743.4	16429.5	13695.7	11914.2	34817.6	14264.2	19307.3	17172.4	15965.6	16342.8	18436.4	13441.2	12662.1	18654.4	16126.2	15237.3	17737.2	16676.5	13271.2	17441.5	14588.4	17573.3	12815.3
M363T28	[M-H]-	Dhas#18	2.39357	2.63957	0.170888	363.221	28.062	2.9941			Organic oxygen compounds	Organooxygen compounds	Carbohydrates and carbohydrate conjugates	48.453	10	10	179900	1.38182e+06	154441	36496.2	133770	233387	183798	276675	194756	88434.3	130054	90546.8	69926	93783.4	60683.5	733447	78917.9	47328.5	51675.6	55966.6	110710	39948.5	41830	209582	25153.9	556439	87258.1	105830	102996	243207	243471	76532.8	44645.4
M436T250	[M-H]-	Dicoumaroyl spermidine	0.391697	1.0233	0.930472	436.224	249.732	2.58059			Benzenoids	Benzene and substituted derivatives	Styrenes	251.289	10	10	6840.89	5875.24	6029.33	27669.4	7065.93	25336.4	12412.2	18090	8228.24	20968.7	26329.9	15132.8	6658.94	16503.8	12778.5	29028.9	22305.5	29149.3	14870.6	15045.9	23072	13322.6	23922.8	30960.4	15161.8	6016.6	8543.63	49559.9	22813.5	17239.1	15799	22347.5	18639.3
M127T313	[M-H]-	Dihydro-4,4-dimethyl-2,3-furandione	0.429228	1.60509	0.493582	127.051	313.133	1.09799		C01125	Organoheterocyclic compounds	Lactones	Gamma butyrolactones	325.929	10	10	26537.6	6372.06	84709	9918.66	8344.64	2832.3	5721.5	8787.53	17341.4	2996.44	3688.76	3994.66	2967.38	4172.77	11162.5	4898.48	3135.31	3677.27	1811.56	7404.18	4339.81	4807	6512.51	2267.33	3469	2124.78	47069.8	5023.52	3451.09	4589.03	1146.96	6949.45	4651.36
M610T228	[M-H]-	Dihydroergocristine	0.184839	0.835458	0.555433	610.316	227.931	4.16756			Alkaloids and derivatives	Ergoline and derivatives	Lysergic acids and derivatives	231.286	6	4	1940.2	17996.3	1036.37	7673.16	4514.18	4444.14	11228.1	7964.39	3795.54	9458.25	8819.5	10035.3	4541.82	3968.85	7253.7	6156.1	5302.13	4067.79	8192.73	3066.68	15727.8	4782.27	7914.59	8438.44	2120.2	3681.24	3037.38	12234	5964.56	15061.6	4974.78	16007.1	6065.71
M149T101_2	[M-H-CH2O2]-	Dihydroisoferulic acid	6.39594	0.724752	0.401571	149.061	101.028	9.8135	HMDB0131138					103.858	10	10	911492	860522	2.18005e+06	674824	2.30709e+06	1.71423e+06	2.36463e+06	1.13986e+06	2.94147e+06	1.06229e+06	1.10911e+07	873025	1.67102e+06	9.69542e+06	5.27582e+06	1.94344e+06	2.29321e+06	2.1161e+06	1.09463e+06	8.01758e+06	1.414e+06	1.73585e+06	4.76392e+06	899309	3.41903e+06	1.01813e+06	2.90245e+06	591747	1.43436e+06	1.29089e+06	2.35162e+06	2.43676e+06	1.91114e+06
M211T130	[M-H]-	Dihydrojasmonic acid	0.970952	0.916582	0.659041	211.134	130.413	0.0172846	HMDB0033601		Lipids and lipid-like molecules	Fatty Acyls	Lineolic acids and derivatives	134.094	10	10	1.02988e+06	85257	239062	126544	191500	240760	133962	156660	93317.9	75513.1	458551	119930	84671.4	376329	176080	221214	260420	245678	95297.2	379053	180003	158122	163763	136858	415134	58708.9	267580	133331	92741.6	193835	211216	247253	222780
M395T339	[2M-H]-	Dl-4-hydroxy-3-methoxymandelic acid	0.165582	0.756984	0.198849	395.119	339.2	0.39622	HMDB0133489	C05584	Benzenoids	Phenols	Methoxyphenols	360.431	10	9	4062.82	5162.37	2717.12	7502.34	4127.68	6510.83	9216.95	7664.5	4403.7	10562.9	8181.71	7070.37	12683.1	7815.82	5613.34	9088.94	9269.59	11511.5	12851.7	7312.72	9767.46	9758.56	6332.37	7496.74	11644.8	13932.3	3095.3	8966.21	9682.32	9019.02	13918.4	13306.9	3607.89
M103T192	[M-H]-	Dl-a-hydroxybutyric acid	0.60268	1.35901	0.259138	103.04	191.8	2.59601	HMDB0000008	C05984	Organic acids and derivatives	Hydroxy acids and derivatives	Alpha hydroxy acids and derivatives	205.266	10	9	22967.3	22887.5	36229.8	37196.6	11096.9	34246.4	24527.9	48404.1	2718.65	16985.9	27939	18346.4	3601.46	21513.3	16492.1	8384.44	13287.7	20321.8	22362.3	16047.9	28833.1	17799.6	18414.3	14944.9	27202.8	4054.02	18340.6	40987	5825.96	22798.9	3666.8	43937.3	19540.2
M411T62	[2M-H]-	Dl-alpha-lipoic acid	0.951181	0.47558	0.216426	411.075	61.768	0.282659			Organoheterocyclic compounds	Dithiolanes	Lipoic acids and derivatives	75.849	10	10	532143	80664.2	149732	41297.5	109217	30481.8	70897.9	42357.8	71695.6	71168.9	50420.8	130382	40879.7	32679.6	528543	117410	31630.2	6492.28	52013.1	65852.7	15823.1	61803.2	131244	41083.2	17409.6	58759.2	169334	51404.3	52492.3	78456.6	25041.9	50471.2	47706.9
M144T255	[M-H]-	Dl-.beta.-homoleucine	0.159084	0.831287	0.133417	144.103	254.66	0.105295			Organic acids and derivatives	Carboxylic acids and derivatives	Amino acids, peptides, and analogues	256.669	10	10	10507.8	5959.22	10506.1	7892.53	14122.6	15181.5	7129	10037.4	12535.1	14039.4	13342.7	9275.77	13534.6	18657.8	16536.5	9622.18	14187.2	13683.5	10320.3	16238	9586.6	10826.2	11876.8	8648.04	14775.1	12617.2	11340.2	7144.09	10107.5	6878.76	18166.9	11712.2	9130.36
M89T229_2	[M-H]-	Dl-lactate	1.94445	1.16476	0.719776	89.0242	228.885	9.81559		C01432				233.116	9	8	85855.4	409829	165163	1.52491e+06	169263	466202	1.2339e+06	627655	68499.8	455328	715185	192354	72111.3	118424	556339	372580	235445	309284	476026	165623	1.21522e+06	279672	525457	801676	171490	80142.4	84319.2	1.7373e+06	192801	1.29381e+06	54796.4	358627	510157
M104T394	[M-H]-	DL-serine	0.120368	0.904752	0.856276	104.035	394.38	0.0777791	HMDB0062263	C00065	Organic acids and derivatives	Carboxylic acids and derivatives	Amino acids, peptides, and analogues	412.536	6	6	1833.25	23517.8	3117.79	2631.78	40185.2	9560.78	2012.57	7898.87	2369.36	2807.61	2192.27	2693.5	1733.38	16288.4	6030.15	7135.42	3212.83	3964.97	3390.22	17770.8	3950.3	5983.41	5459.17	775.164	6970.54	3299.93	1063.78	1438.39	2353.38	1646.45	1735.46	4278.51	4279.33
M341T391	[M-H]-	D-Maltose	3.59162	1.94568	0.261858	341.109	390.874	4.05702	HMDB0000163	C00208	Lipids and lipid-like molecules	Fatty Acyls	Fatty acyl glycosides	394.851	10	9	149992	82993.6	28384.2	2.11662e+06	121676	859829	251680	1.0799e+06	36859.4	442915	155157	509038	59008.6	424195	464608	385139	329852	1.40152e+06	112267	2.71994e+06	400968	81170.8	800333	352927	428974	86667	55830.5	1.38785e+06	244841	429148	275770	68759.5	342888
M179T366	[M-H]-	D-(+)-mannose	1.26874	1.47413	0.197369	179.056	365.884	0.957101	HMDB0062473	C00936	Organic oxygen compounds	Organooxygen compounds	Carbohydrates and carbohydrate conjugates	371.718	5	5	92091.6	29386.2	155253	222343	62766.3	117936	48288.7	82456.5	36788.6	86883	53425.4	61347.3	21582.1	46248.6	112916	160222	47767.6	95225.1	119043	99250.3	64105.9	28406.8	69397.5	39762.4	58543	57365.8	131295	165087	41849	88483.1	27087.4	47699.9	44296.2
M179T391	[M-H]-	D-Mannose	1.08134	1.0656	0.84386	179.056	390.947	0.763014	HMDB0062473	C00936	Organic oxygen compounds	Organooxygen compounds	Carbohydrates and carbohydrate conjugates	393.62	10	10	66734	48198.5	124297	357820	72828.2	172187	109649	160483	63410.5	143351	85441.4	133835	30078.9	96013.2	127672	126007	82126.6	216984	55923.4	409359	93550.3	46666.2	157857	88635.2	98653.3	27286.9	83039.8	230552	61888	124129	76338.6	204276	93203
M229T291	[M-H]-	Dodecanedioic acid	0.668747	0.910569	0.715926	229.145	291.184	1.89101	HMDB0000623	C02678	Lipids and lipid-like molecules	Fatty Acyls	Fatty acids and conjugates	295.596	10	10	627247	369389	644588	261306	861100	179635	168016	294941	396998	138035	344929	240258	177680	531047	249397	188561	291834	412676	182899	810625	218224	470062	249122	121887	1.13326e+06	192218	764297	169617	115830	281389	240160	690672	204572
M199T52_2	[M-H]-	Dodecanoic acid	0.774609	0.952936	0.829156	199.17	51.858	1.14644	HMDB0000638	C02679	Lipids and lipid-like molecules	Fatty Acyls	Fatty acids and conjugates	52.675	10	10	171502	262666	281287	195802	314618	215835	183483	214614	720781	237475	305036	203403	220132	326023	334278	217202	213021	234285	216367	311061	172818	271014	187232	203544	200015	263415	226741	210299	172638	165984	198590	193056	199187
M391T35_2	[M-H]-	Dodecanoic acid, 12-[[(tricyclo[3.3.1.13,7]dec-1-ylamino)carbonyl]amino]-	0.490075	0.87881	0.432192	391.322	34.6175	0.685528			Lipids and lipid-like molecules	Fatty Acyls	Fatty acids and conjugates	35.686	9	9	86669	134921	144084	62645.5	211068	92635.1	60836.2	63463.8	210326	94578.8	70902.1	68871.9	121923	134744	49566.5	124148	126656	101853	55229.4	139035	73412.7	118399	40403.8	85950.8	155158	104321	188755	64775.3	56589.4	90268.8	117580	111118	108982
M413T59	[M-H]-	Doxorubicinone	0.208949	0.847663	0.682301	413.091	59.313	0.843894			Benzenoids	Naphthacenes	Tetracenequinones	72.251	10	8	319448	80840.3	195064	45624.9	161029	35979.6	65071.8	32464.4	23591.9	110451	36323.9	90142.3	9752.24	31614.5	199075	108381	25367.3	13389.1	16219.9	55750.8	20807.4	83838.3	28867.8	53315.9	24288.6	40660.5	112497	45095.3	52215.8	90957.4	50024.2	56895.1	37309.1
M163T222	[M-H]-	D-quinovose	0.497582	1.38438	0.314444	163.061	221.976	1.11173		C02522	Organic oxygen compounds	Organooxygen compounds	Carbohydrates and carbohydrate conjugates	236.204	7	4	42048.3	9353.78	25263.3	43364.9	37881.1	16838.1	11808.6	22042.7	6299.99	13167	38239.6	14252.1	4289.86	11619.9	19121.9	16733	8201.27	13560	14187.4	15045.7	14278.2	8329.27	10276.1	7614.28	18323	3737.84	583.553	23989.3	6487.14	49735.8	5201.89	14929.1	12074.3
M149T214	[M-H]-	D-ribose	2.12314	1.53652	0.247354	149.045	213.683	1.53365	HMDB0000283	C00121	Organic oxygen compounds	Organooxygen compounds	Carbohydrates and carbohydrate conjugates	216.853	10	7	90184.2	90735.3	47442.7	383308	141572	767340	261344	367594	56157.8	248418	229209	289402	71411.7	135660	316984	472133	226048	237612	269022	313739	559770	238340	357434	303541	265005	67588.5	34231.3	599052	114584	405980	127715	155215	441311
M229T46_2	[M-H]-	D-ribose 5-phosphate	0.402136	1.39819	0.153913	229.035	45.835	0.817602		C00117	Organic oxygen compounds	Organooxygen compounds	Carbohydrates and carbohydrate conjugates	58.122	4	6	23859.6	19532	47942.1	33118.8	7145.12	25004	44143.2	63255.1	17959.5	37112.5	56782.7	48811.5	46769.6	32007.9	71750.9	80992.2	70946.6	53752.1	47094.5	58239.9	37515.3	26987.9	34857.4	75515.8	46238	83666	29907.8	41977.4	64536.7	35220.8	26144.5	39851.7	53233.2
M154T53	[M-2H]2-	D-ribulose 1,5-bisphosphate	0.226233	0.909325	0.798873	153.981	52.537	4.25314		C01182	Organic oxygen compounds	Organooxygen compounds	Carbohydrates and carbohydrate conjugates	59.3	7	5	128676	4274.16	31848.7	2046.22	27948.2	13530.4	5077.04	13846.7	12020.2	2149.11	3861.1	4350.88	12749.5	3624.4	18843.5	3802.48	8120.06	1583.91	6024.08	5244.16	2297.19	9417.7	2105.14	8157.69	3529.74	8055.86	5244.01	11086.2	10023.1	9019.79	13126.9	3862.99	11966.2
M229T144	[M-H]-	D-ribulose 5-phosphate	0.146418	0.996861	0.98843	229.003	143.861	1.82978	HMDB0001548	C00199	Organic oxygen compounds	Organooxygen compounds	Carbohydrates and carbohydrate conjugates	152.274	10	10	351903	59081	144823	76687.9	78360.7	84198	63162.6	61952.2	68015.8	47548	78037	79905.1	27171.5	61347.8	167533	84217.8	62918.1	39197.1	89517.1	62120.3	72462.7	42369.3	52461.4	76085.1	28415.9	43754.6	88722	70198.5	51272	67592.1	64102	89356	54471.8
M555T39	[M-H]-	Dronedarone	0.336222	0.786692	0.162021	555.267	38.6775	5.51237			Organic oxygen compounds	Organooxygen compounds	Carbonyl compounds	52.973	9	9	20649.8	87155.3	41709.1	75186.5	60806.4	98074.4	81658.3	45672.6	60263	102632	65357.4	208710	72069.1	131914	56619.6	100163	43359.7	46587.2	133694	76066.5	109873	85696.9	32468.6	45824.1	33493.6	73112.7	50635.9	20682.2	87279	233080	126088	112407	68537.4
M633T205	[M-H]-	Echinocystic acid-3-o-glucoside	0.372231	1.01306	0.967456	633.401	204.809	1.89291			Lipids and lipid-like molecules	Prenol lipids	Terpene glycosides	210.807	10	9	73679.5	33760	89262.8	48033	41979.9	26259.5	18539.3	34664.4	9268.25	23528.8	21309	29897	18063.8	18649.7	20614.4	24039.7	21872.7	27772.2	16668.7	24039.7	24570.5	28630.6	22050.4	17544.9	54408.5	10145.9	129300	42012.9	14215.3	37456.1	14828.3	68227.4	24189.5
M309T46	[M-H]-	Eicosenoic acid	2.85976	1.05168	0.811696	309.28	45.895	0.326049		C16526	Lipids and lipid-like molecules	Fatty Acyls	Fatty acids and conjugates	46.915	10	10	1.4707e+06	2.61844e+06	1.22361e+06	935292	1.14488e+06	987783	1.3768e+06	919351	1.19252e+06	1.27909e+06	969840	1.42225e+06	1.47794e+06	812322	939847	862132	610785	540390	631621	1.04933e+06	1.02607e+06	1.44791e+06	1.0059e+06	966318	958386	1.6078e+06	1.23438e+06	905333	1.07099e+06	1.62409e+06	685521	733230	771769
M777T467	[M+Cl]-	Eleutheroside e	0.333683	1.29364	0.59612	777.233	467.008	1.61005		C20786				481.682	9	6	1755.94	1039.25	1410.18	11538.5	1472.41	21161.1	8200.51	16369.2	976.667	19627.7	11972.6	2482.36	713.213	3706.59	6677.98	7205.44	5429.72	22840.4	3260.41	12800.4	13088	2086.19	3436.25	7585.4	4800.41	1169.19	1380.59	22444.6	4885.97	15441.2	4226.16	3565.55	2116.82
M301T296	[M-H]-	Enterodiol	0.289912	0.620112	0.19669	301.165	295.673	3.22105	HMDB0005056	C18166	Lignans, neolignans and related compounds	Dibenzylbutane lignans	Dibenzylbutanediol lignans	314.769	6	5	25452.3	21917.6	27579.6	8512.21	23987.2	9648.78	12003.5	9608.75	53091.9	11275.6	21743	5193.39	20613.2	18785.6	10921.5	5760.91	10095.6	11851.8	9748.35	21141.1	6946.84	11400	7987.23	7021.7	8148.56	9970.97	16082.9	13863.9	8332.22	8590.47	8342.06	9464.36	7042.77
M337T36_2	[M-H-C2H6O4]-	Eplerenone hydroxy acid	0.848231	0.881199	0.663785	337.205	36.443	1.87713						49.123	10	10	285520	497053	188045	136372	90546.8	78873.8	201380	300890	327877	331761	365985	358165	780050	510907	186198	1.19982e+06	357375	119415	348667	51788.1	274896	180240	237556	423052	12483.7	588709	19782.7	200248	564165	440476	602094	226585	223673
M241T38_1	[M-H]-	Equol	0.545007	0.914469	0.60251	241.087	38.004	0.521806	HMDB0130495		Phenylpropanoids and polyketides	Isoflavonoids	Isoflavans	38.973	8	7	189180	618286	145256	566942	342670	439377	552630	371071	234502	437211	737065	608445	483423	531817	372750	542900	806816	568762	987625	280160	1.00645e+06	1.41729e+06	438274	711987	576654	599192	373129	773350	704076	629280	916493	734864	569989
M459T307	[M-H-C8H8O2]-	Eriodictyol 7-o-neohesperidoside	0.133087	0.998028	0.992571	459.093	307.061	1.02482		C09805	Phenylpropanoids and polyketides	Flavonoids	Flavonoid glycosides	311.645	10	10	1936.46	2292.83	3606.14	4412.11	850.259	6709.41	4795.26	8041.23	6201.65	4681.6	8727.45	6234.39	8538.9	7522.01	8987.83	7595.17	13248	3723.06	4939.99	4139.94	9418.49	2413.1	7005.97	6964.04	3435.01	5343.11	959.684	5555.53	6232.88	3710.87	7734.02	3937.47	6079.46
M269T112	[M-H]-	Estrone	1.0326	0.982765	0.95746	269.176	112.337	1.92104	HMDB0000145	C00468	Lipids and lipid-like molecules	Steroids and steroid derivatives	Estrane steroids	128.843	10	10	260510	79187.3	126999	89625	98156.9	74794.8	93705.9	88523.5	39091.9	95712.7	154006	96293.7	70446.9	175358	247621	117456	81244.8	117477	67771.3	328919	117282	84816.2	142565	44066.4	176828	43301.5	138907	81407.7	64310.4	99844.6	105410	208164	114618
M314T35	[M-H]-	Ethanesulfonic acid, 2-[(2,6-diethylphenyl)(methoxymethyl)amino]-2-oxo-	0.880361	0.94195	0.735558	314.107	35.3355	1.43363			Benzenoids	Benzene and substituted derivatives	Anilides	37.559	10	10	289559	714166	468211	256125	559165	355599	279876	305644	275314	238683	352791	455858	553349	537166	235758	252813	369662	459967	340846	462666	343282	756563	122298	247352	596855	470443	428096	241547	383827	370229	481390	909279	338181
M311T69	[M-H]-	Fa 18:2+2o	17.169	1.34687	0.241572	311.223	68.612	1.10701			Lipids and lipid-like molecules	Fatty Acyls	Lineolic acids and derivatives	71.05	10	10	5.10157e+06	3.16057e+06	1.58183e+07	2.75676e+07	8.0773e+06	2.618e+07	1.4276e+07	3.23578e+07	2.92346e+06	3.0513e+07	3.33178e+07	1.47752e+07	1.31453e+07	2.74916e+07	2.17597e+07	1.70158e+07	2.15619e+07	2.39773e+07	2.64508e+07	2.16174e+07	1.55915e+07	1.60047e+07	1.89596e+07	1.48444e+07	1.33695e+07	1.89321e+07	1.37343e+07	1.90013e+07	1.24351e+07	2.00676e+07	2.7605e+07	1.76098e+07	1.86463e+07
M343T207	[M-H]-	Fa 18:2+4o	1.80881	0.688929	0.18617	343.212	206.945	1.20144			Lipids and lipid-like molecules	Fatty Acyls	Fatty acids and conjugates	215.137	9	10	214131	147402	138374	267646	219649	449200	144337	218762	161672	178520	186927	180431	177371	781243	462603	185138	209076	241405	171439	251985	188367	171432	183151	144852	324160	173305	198570	284606	153692	191002	204492	623679	392193
M325T86	[M-H]-	Fa 18:3+3o	5.52049	1.96885	0.21293	325.202	86.373	0.169675			Lipids and lipid-like molecules	Fatty Acyls	Lineolic acids and derivatives	91.268	7	7	223094	141892	982419	2.0907e+06	327905	1.31991e+06	735242	6.08564e+06	75952.8	1.3559e+06	1.36425e+06	601788	837118	1.11865e+06	1.69496e+06	1.12549e+06	1.16207e+06	1.63379e+06	1.58791e+06	1.01197e+06	928983	1.02123e+06	1.38436e+06	668989	807518	1.03388e+06	972581	1.1655e+06	805629	908248	1.92423e+06	1.11605e+06	1.09496e+06
M564T47	[M-H]-	Fahfa 36:1	0.62298	0.972736	0.898811	563.503	47.193	1.86556			Lipids and lipid-like molecules	Fatty Acyls	Fatty acids and conjugates	48.815	8	9	133988	85246.7	154405	74314.2	136303	72876.3	88290.4	79962.9	216396	158801	55972.7	66871.4	42607.9	51141	77631.2	51591.6	73063.9	78191.5	74509.6	75098.2	68310.3	66670.5	99987.5	90551.6	83349	60504.3	105975	74560	67145.3	55401.2	82340	56699.4	73144.5
M561T39	[M-H]-	Fahfa 36:2	1.56733	1.14301	0.294503	561.489	38.5645	5.03802			Lipids and lipid-like molecules	Fatty Acyls	Fatty acids and conjugates	49.202	10	10	302755	296968	397414	455065	414967	235613	342159	190009	180972	410514	220138	236377	222939	364903	258498	135409	281939	246348	182129	327099	285545	279479	560845	362814	399457	274156	242403	263625	191191	226552	273924	190932	465594
M559T38	[M-H]-	Fahfa 36:3	1.394	1.1256	0.342468	559.473	37.831	1.39195			Lipids and lipid-like molecules	Fatty Acyls	Fatty acids and conjugates	49.882	10	10	334595	303382	454909	216244	337511	218227	309132	234236	151679	391919	220931	192871	183281	227765	174939	206045	253527	256599	204599	329547	285489	319115	282421	334413	474579	237471	378889	242614	172442	196193	228282	190009	253324
M557T37	[M-H]-	Fahfa 36:4	1.17658	1.12628	0.393132	557.458	37.436	2.86971			Lipids and lipid-like molecules	Fatty Acyls	Fatty acids and conjugates	49.181	10	10	118914	104832	153683	97264.5	114275	87033.1	82536.7	85713.6	78310.4	126462	53193.9	59092.3	60854.1	67965	55156	70876.3	100742	78259.1	64871.3	75530.4	90543.5	95288.3	54334.3	163193	174723	95845	153516	113546	78332.6	77657.9	71665.8	63827.7	92001.6
M583T47_2	[M-H]-	Fahfa 38:5	0.460286	1.00554	0.980155	583.471	46.517	4.42642			Lipids and lipid-like molecules	Fatty Acyls	Fatty acids and conjugates	66.591	10	9	34074.2	30963.1	87900.5	39963.1	80236.5	31977.1	50585.6	32149.6	49628.3	35752.1	25859	21055.8	17614.1	21417.6	34833	31035.9	33082.4	52580.6	26316.4	57021.8	42059.9	57410.3	45932.2	46554.7	57599.3	31041.9	52577.1	34440.6	26681	38694.2	34488	20880.4	38963
M224T387	[M-H]-	Flufenacet oa	0.0992008	0.996332	0.987209	224.057	387.294	3.75218			Organic acids and derivatives	Carboxylic acids and derivatives	Amino acids, peptides, and analogues	390.31	10	10	9765.7	4886.46	19624.3	11330.8	9014.81	11942.4	4466.11	4963.92	16744	10832.3	7378.74	11053.9	7276.18	6445.5	6176.81	4156.8	6128.53	5835.44	4616.87	8552.42	9306.74	6122.6	4797.35	4107.34	7505.62	8377.16	6884.91	4932.26	5082.55	5693.31	9164.02	9130.29	3450.26
M311T18	[M-H-C3H5O2N4]-	Folate	0.527515	1.12832	0.553832	311.116	17.928	1.60023	HMDB0000121	C00504	Organic acids and derivatives	Carboxylic acids and derivatives	Amino acids, peptides, and analogues	31.855	4	8	73058	58783.2	132361	48035.1	79652.7	103379	69515.6	67478.6	32968.5	45569.7	42754.2	110597	120191	94517.4	60454.2	43063.1	50149.3	46576.4	64111.9	131512	81797.5	37039.6	16894.8	61400.9	60562.7	126664	41457.8	81783.1	45041.3	73119	48261.3	47226.3	39212.4
M164T63	[M-H]-	Formylanthranilic acid	1.21857	0.700903	0.359643	164.035	63.208	0.1977	HMDB0004089	C05653				73.162	10	10	182121	37937.9	68998.7	90047.8	110649	103505	141285	123543	33922.8	89739	177534	93544.4	58797.1	93253.9	467528	76034.2	117871	82020.3	44354.5	165026	136585	75072.8	193902	142833	78454.5	35108.1	92542.7	78006.2	106632	93503.4	75112.5	100610	129352
M259T258	[M-H]-	Fructose 1-phosphate	1.39249	0.497601	0.322104	259.013	257.649	0.0196551	HMDB0001076	C01094				272.389	9	10	117408	57024.5	29623.5	93853.7	51359.6	181948	25615.3	274033	3895.12	14796.1	48140.6	361416	7325.76	284219	16793.5	112950	63561	18429.6	223734	79657	53342.6	32544.9	14428.6	7524.09	76508	5502.64	38532.9	264214	5405.48	123582	11792.1	798110	16153.3
M621T225	[M-H]-	Fulvestrant 9-sulfone	0.283254	0.670977	0.0147622	621.324	225.052	2.17369			Lipids and lipid-like molecules	Steroids and steroid derivatives	Estrane steroids	230.016	8	9	6530.2	9875.8	4718.5	6009.91	16000	3893.03	7588.8	8763.93	12993.1	13017.5	7903.16	12543	12298.7	9640.63	7859.46	4418.64	7254.57	7057.51	6211.19	8936.07	10784.8	5356.72	3666.78	7105.05	8142.2	7806.53	4393.39	7531.1	9024.6	9235.06	15756.1	6618.09	4763.46
M457T313	[M-H]-	Fumagillin	0.153386	0.890211	0.553277	457.232	313.283	5.41266		C09668	Lipids and lipid-like molecules	Fatty Acyls	Fatty acids and conjugates	319.649	7	7	9996.73	2502.74	10705.6	11134.9	5303.89	14239.7	4008.13	5017.51	12487.3	11355.6	5350.69	7635.27	6080.01	12034.5	11577.7	7904.86	6928.71	5128.72	4612.82	18971.7	7135.36	5713.11	2623.14	2473.36	25745.6	2884.85	9562.25	9500.75	6805.68	5000.68	8378.41	6212.22	7495.27
M1082T74	[M-H]-	Furostane base + o-hex, o-hex-hex-hex	0.164511	0.859733	0.59806	1081.56	74.198	9.63062	HMDB0034083		Lipids and lipid-like molecules	Steroids and steroid derivatives	Steroidal glycosides	88.901	8	5	6774.52	11900.6	1612.1	7195.77	3897.07	4628.08	10228.8	16256.8	12287.2	5758.29	5220.26	15466.7	24975	6405.28	10359.4	9578.35	10472.1	10381.2	10893.6	10579.9	11937.6	10976	3829.54	9643.3	8857.61	23158.1	5983.27	2110.65	11333.6	16592.8	11126.4	7619.67	7141.02
M583T206	[M-H-CO2]-	Gambogic acid	0.584904	0.695118	0.143514	583.325	206.042	0.51472		C10062	Organoheterocyclic compounds	Benzopyrans	1-benzopyrans	226.388	10	10	17019.6	46876.7	9568.41	12661.3	29787.8	21167.2	42318.8	18837	39703.3	24835.5	26159.2	95369.3	52608.2	23307.5	38693.2	17377.1	13025.5	10811.5	12888.9	25122.7	26849.3	14361.8	30958.9	14052	5692.61	11297.1	15758.6	11977.4	16109.2	13861.9	29888.9	27933.8	14324.9
M249T88_2	[M-H]-	Gamma-Glu-Cys	0.63516	0.870651	0.594449	249.061	88.174	0.23101	HMDB0001049	C00669	Organic acids and derivatives	Carboxylic acids and derivatives	Amino acids, peptides, and analogues	103.594	10	10	90301.4	68440.6	49267.7	107654	76221.9	92919	36736.3	129282	103525	74332.4	78656.6	82965.9	26298.4	109096	221355	23804	57611.2	51373.3	49967.7	64948.9	179174	74757.2	107678	29670.6	52862.7	29906.3	23387	17054.8	44461.2	51398.9	107249	125754	18420.4
M509T393	[2M-H]-	Ganciclovir	0.203532	1.19838	0.409538	509.203	393.144	6.16835	HMDB0015139	C07019	Organoheterocyclic compounds	Imidazopyrimidines	Purines and purine derivatives	395.027	10	10	3504.44	4724.27	2912.2	12665.9	4804.15	5269.47	4455.25	4611.79	3054.91	6124.36	5636.86	4598.46	2715.07	4920.37	4210.51	3630.35	5568.43	5421.34	4222.89	4882.81	3028.35	5358.09	5007.01	7379.98	3786.03	3304.97	3257.44	8236.25	2096.17	3057.59	2107.33	7262.95	5481.88
M551T32	[M+Cl]-	Ganoderic acid a	1.59691	1.63101	0.540154	551.27	31.654	0.22755			Lipids and lipid-like molecules	Prenol lipids	Triterpenoids	35.011	9	8	66065.6	1.46435e+06	53174.5	63600.9	136325	59031.3	40777	98138.1	65805.7	58399.3	87501.5	174951	198508	58158.1	44131.5	39117.9	78486.2	295901	117366	39122.6	299459	68748.3	39949.3	68955.6	25025	110393	223176	50344.9	110789	91515.2	122563	317447	227650
M553T34_1	[M-H-H2O]-	Ganoderic acid h	0.686257	1.05345	0.866336	553.284	33.636	2.31317			Lipids and lipid-like molecules	Prenol lipids	Triterpenoids	36.035	8	9	38826.8	287757	49964.8	49130.1	62598.5	87589	166725	98875.2	109827	105086	74616.4	239489	240128	56338	101035	75947.3	251070	42264.9	116661	43005.5	87222.2	69587.5	15540.3	55750.1	398436	80448.1	180073	46535.5	85708	70286.7	87456.7	141540	90114.2
M330T36	[M-H-CO2]-	Gatifloxacin	0.0855905	1.00025	0.999213	330.174	36.3865	5.90222	HMDB0015178	C07661	Organoheterocyclic compounds	Quinolines and derivatives	Quinoline carboxylic acids	49.723	7	8	27693.9	3223.49	7300.77	8228.74	2908.35	5666.27	8428.38	3905.01	3392.89	3595.57	4289.44	13761.6	10259.1	2709.24	9767.19	3988.35	14909.1	3636.5	8414.99	2138.64	27609.5	7747.18	9147.23	3836.4	4314.84	4714.06	10077	3074.24	2784.64	44869.8	5844.54	5422.59	5940.72
M269T47	[M-H]-	Genistein	1.25636	1.12107	0.63216	269.046	47.146	3.57883	HMDB0003217	C06563	Phenylpropanoids and polyketides	Isoflavonoids	Isoflav-2-enes	49.166	10	10	359872	139103	76839.9	380674	133318	180329	230238	200311	44133.5	106769	161058	208278	142442	199210	81416.4	496252	128525	201619	93962	267966	204032	250155	88965.3	197897	360158	107096	210239	223579	218265	443897	75089.3	140266	241580
M401T395	[M+FA-H]-	Gentiopicroside	1.59495	2.10682	0.220588	401.13	394.985	1.55327			Organic oxygen compounds	Organooxygen compounds	Carbohydrates and carbohydrate conjugates	399.18	10	9	43067.4	7418.79	12560.7	379148	26489.4	115638	46115.6	234375	6144.51	132740	10980.1	80070	13659.8	75593.2	60088.3	80839.8	60618.2	217229	22213.9	371713	65834.8	11688	101624	58824.8	74980.3	18175.2	14301.2	180594	35510.7	81942.4	44203.1	8155.09	61440.4
M449T414	[M-H]-	Geranylgeranyl pyrophosphate	0.113287	0.692104	0.138624	449.177	413.653	0.715208	HMDB0004486	C00353	Lipids and lipid-like molecules	Prenol lipids	Diterpenoids	415.878	4	8	2170.1	2790.12	3399.45	2595.22	5144.44	2380.24	3565.26	2601.94	8291.27	2445.89	3929.75	2748.43	2187.01	2682.28	3163.41	1952.24	2134.33	1621.88	1617.7	2245.08	1788.09	1880.64	1686.08	2323.56	2700.57	1757.14	2078.91	2568.48	941.888	989.637	2061.34	2745.45	1623.29
M811T179	[M+FA-H]-	Ginsenoside rg6	0.205172	0.674665	0.254232	811.499	179.07	5.79366			Lipids and lipid-like molecules	Prenol lipids	Triterpenoids	195.312	10	5	27211.4	3509.71	38781.9	14942.7	59669.1	8359.28	8461.53	10636.2	40366.6	12857	16542.2	4656.14	13039.8	20673.1	18011.4	6933.59	10991.6	18940.3	9484.49	20116.2	7493.29	13662.1	9660.84	8736.41	17459.4	8516.65	74044.1	9778	5770.63	6949.93	6838.13	14293	6827.31
M146T301_2	[M-H]-	Glutamic acid	2.18702	1.14202	0.694778	146.046	300.877	4.53856	HMDB0000148	C00025	Organic acids and derivatives	Carboxylic acids and derivatives	Amino acids, peptides, and analogues	305.905	10	10	146944	779752	1.28831e+06	855738	1.84897e+06	472742	229490	641281	237132	237784	277862	2.39912e+06	466700	479151	866690	198022	214145	295071	100938	433655	318255	80202.5	265626	111058	464267	55742.3	433562	479965	319265	768175	122179	190438	1.22445e+06
M145T382	[M-H]-	Glutamine	0.37111	0.655702	0.286637	145.061	381.5	3.84832	HMDB0000641	C00064	Organic acids and derivatives	Carboxylic acids and derivatives	Amino acids, peptides, and analogues	402.589	7	9	29960.5	5629.56	4738.65	13087.6	4706.15	34003.1	11990.8	44238.5	30123.4	18985.3	27410.9	13650	1748.28	50117.9	22461	11213.3	15103.7	37115.4	31153	37116.6	11303.1	19314	17043.3	6715.33	106183	10866.9	55906	49416.3	919.428	21267.6	11365	41451.4	10666.8
M131T383	[M-H]-	Glutaric acid	0.163902	0.58035	0.116334	131.035	382.806	1.45882	HMDB0000661	C00489	Organic acids and derivatives	Carboxylic acids and derivatives	Dicarboxylic acids and derivatives	385.62	8	8	71180	14224.8	65128.7	31875.2	41768.5	21591.9	20933.6	26646.9	70768.2	22736.4	22914.1	18403.5	11810.7	25307.6	25470.9	16924.7	14529	16788	16664.3	29965.9	14888.2	16855.2	15657.8	16501.4	26007.8	10966.6	64930	25587.1	57556.5	18469.3	9176.13	28082.9	13143.1
M334T301	[M-H]-	Glutathione ethyl ester	0.0316586	0.877155	0.729239	334.095	300.592	1.47658			Organic acids and derivatives	Carboxylic acids and derivatives	Amino acids, peptides, and analogues	305.045	8	9	14221.1	14931.5	9390.56	15868.8	47840.2	11186.8	9753.45	5589.25	4426.18	8333.02	8988.77	55751.9	9547.2	11089	16541	4633.35	6795.75	4867.86	6201.02	5881.76	9372.91	4566.61	13016.2	3523.27	8785.72	3486.9	3494.68	5066.55	12047.1	22208.3	5923.39	5232	28876.2
M145T345	[M-H]-	Gly-Ala	0.259756	0.934985	0.811761	145.062	344.979	3.56234			Organic acids and derivatives	Carboxylic acids and derivatives	Amino acids, peptides, and analogues	349.992	10	10	4221.18	10811.8	28261.9	27215	21039.7	22444	15867.8	46115.8	39648	22183.2	30208.4	11800.6	17666.5	86791.8	31783.8	23914.8	25929.7	24114	13827.2	65993.8	34748.4	31496	19181.9	29521.5	22585.6	23121.3	4086.34	23465.1	17827.8	21126.4	15241	23838.2	15791.6
M105T327	[M-H]-	Glyceric acid	0.421006	1.15971	0.543304	105.019	327.032	1.1452	HMDB0031818	C00258	Organic oxygen compounds	Organooxygen compounds	Carbohydrates and carbohydrate conjugates	342.203	9	8	13092.2	40636.5	25612.1	61155.2	17919.3	39306.6	15677.4	16112.6	39119.6	11364.3	12055.3	37537.4	5055.52	21268.2	18097.8	11540.4	26106.4	21538.1	17754.1	31014.1	13967.4	12543.4	58833.1	9495.3	39633.4	8162.08	39101.6	19007	8546.21	36259.5	11082.6	35902.8	15234.8
M91T135	[M-H]-	Glycerol	0.23152	0.773896	0.363135	91.0549	134.822	0.617154	HMDB0000131	C00116	Organic oxygen compounds	Organooxygen compounds	Carbohydrates and carbohydrate conjugates	154.341	10	10	54844.3	46432.9	171788	24086.2	94590.6	44859.7	35418	41323.2	131148	22664.9	127389	31672.1	43081.4	100192	82933.3	41463.9	40687.2	61845.2	27471.3	147696	28772.7	42151.9	34658	9545.13	87967.7	27459.6	156553	35391.8	20399.8	46525.5	59106.9	57987.9	40412.1
M74T301	[M-H]-	Glycine	0.454663	1.08734	0.836644	74.0243	300.791	3.9701	HMDB0000123	C00037	Organic acids and derivatives	Carboxylic acids and derivatives	Amino acids, peptides, and analogues	305.905	9	9	8242.15	37069.3	64490.9	17254.8	70877.8	9810.52	7767.97	13917.4	14285.6	7705.02	11494.8	50923.3	23984.2	12026.3	23495.9	5048.03	6232.92	7416.2	3262.48	15259.7	16803.9	4357.42	7138.76	3069.78	11405.3	3371.93	23739.7	9493.33	9855.13	22282.6	3621.24	9877.16	27610.6
M339T28_2	[M-H]-	Gly-His-Lys	2.61491	0.9332	0.822291	339.2	28.066	1.02488			Organic acids and derivatives	Carboxylic acids and derivatives	Amino acids, peptides, and analogues	46.543	10	10	749837	1.05412e+06	1.00883e+06	1.34577e+06	986700	2.96869e+06	1.03343e+06	1.86377e+06	1.18129e+06	1.70693e+06	1.52388e+06	1.49055e+06	2.10057e+06	5.70812e+06	1.00319e+06	1.17801e+06	1.50447e+06	2.32636e+06	1.48719e+06	1.13571e+06	1.14e+06	1.24e+06	935886	2.1635e+06	2.39217e+06	1.27928e+06	2.38808e+06	1.89273e+06	1.5545e+06	1.08689e+06	1.66281e+06	1.1348e+06	2.00099e+06
M261T358	[2M-H]-	Guanidinopropionic acid	0.365761	1.19212	0.501522	261.134	357.78	1.22862	HMDB0013222	C03065	Organic nitrogen compounds	Organonitrogen compounds	Guanidines	362.461	10	10	20760.6	15578.9	41254.8	28110.9	31033.1	12355.2	8663.65	14781.4	14885.4	15212	6770.18	14317.1	3855.29	13266.9	14232.7	6807.13	10150.6	13596	9024.27	21135.4	10651.8	11186.7	7661.85	10060	28478.5	11228.5	29127.5	22715.8	13931.6	18959.5	7525.67	28078.7	6841.48
M116T285	[M-H]-	Guanidoacetic acid	0.747007	1.28844	0.606159	116.035	285.432	4.7818	HMDB0000128	C00581	Organic acids and derivatives	Carboxylic acids and derivatives	Amino acids, peptides, and analogues	288.326	7	8	13039.2	85344.6	196250	37826.7	115847	9056.24	39405.6	20465.7	60252.8	25210	53704.9	48328.4	22357.6	13588.1	102112	13533.5	11085.6	8781.95	10540.9	21363.2	15926.3	9260.07	15765.5	11771.4	8665.75	5985.8	85794.9	19723.5	13330.2	137893	6623.08	22778	37276.1
M609T228	[M-2H]2-	Hederacoside c	0.222318	0.835463	0.589985	609.314	227.833	1.1268			Lipids and lipid-like molecules	Prenol lipids	Terpene glycosides	230.616	10	5	3065.66	34489.8	5322.28	14988.3	6515.7	10969	21708.5	15178.9	4898.94	19018	16202.8	14569.6	6326.48	4480.45	16313.9	12924	6414.62	11870.2	17919.6	2690.13	30253.5	8913.08	14209.1	17405.7	5276.48	5664.19	3057.47	26043.7	11649.3	33214.6	5812.35	33215.6	15441.6
M579T30	[M-H-H2O]-	Hematoporphyrin	0.650159	0.920147	0.873275	579.263	29.8335	4.45555			Organoheterocyclic compounds	Tetrapyrroles and derivatives	Porphyrins	32.901	4	6	34984.6	90241.3	50348.1	27293.4	11788.7	136071	67802.5	19881.7	19135.1	15009	15223.5	32785.9	18381.1	309916	10064	17687.7	103904	176317	89158.9	202622	92933.3	98561.7	94878.6	12967.7	16056	27840	20764.7	76746.9	23780	20898	11133.1	25888.7	39976.1
M301T304	[M-H]-	Hesperetin	0.145808	1.39701	0.458683	301.059	303.771	1.73168	HMDB0030746	C01709	Phenylpropanoids and polyketides	Flavonoids	O-methylated flavonoids	320.777	10	10	4989.73	6772.34	12175.8	14910.6	8945.34	13530.8	9276.69	15654.7	13054.4	10975.7	9279.76	12826.2	8933.34	12382.8	16509	12835.1	11230.6	17566.4	11548.1	19169.5	14697.9	7298.47	17812.2	13105.8	11600	9024.67	5522.11	12843.8	12604.6	8523.01	15397.6	10859.5	7292.85
M172T196_2	[M-H]-	Hexanoylglycine	2.94199	1.55793	0.530833	172.098	196.087	0.917401	HMDB0000701		Organic acids and derivatives	Carboxylic acids and derivatives	Amino acids, peptides, and analogues	211.92	10	10	168205	135739	3.02284e+06	180865	602522	224723	104382	220978	792439	99108.3	276530	118280	30310.4	394521	179588	149013	99857.6	226337	153887	557190	105324	115535	101014	28095.6	324287	34159.3	851291	152955	25813.7	130199	42151.4	239355	157695
M636T207	[M-H]-	Hexosyl lpe 18:3	0.19925	1.01999	0.936478	636.316	206.968	3.20323						208.484	9	8	3734.26	9363.95	5342.49	6265.35	5592.59	9697.77	4516.66	9602.47	7935.78	5762.11	16341.1	16760.8	9442.89	18072.6	8572.33	7977.99	9867.92	9527.01	9839.57	13823.9	9759.92	9340.11	6844.3	5887.46	8911.37	7493.54	4957.14	7192.28	6669.55	8807.41	9734.39	10440.2	6609.34
M921T200	[M-H]-	Hexsose-deoxyhexose + hexsose-deoxyhexose + c20h32	0.146844	1.09385	0.610289	921.493	199.775	0.491187			Lipids and lipid-like molecules	Prenol lipids	Terpene glycosides	204.368	8	9	6065.91	4800.3	6797.32	4704.83	3616.64	4550.4	4547.48	9224.99	2861.09	4927.41	4113.34	2847.38	5143.88	7402.22	3983.22	4852.06	4018.51	4866.13	4416.23	5453.1	5857.14	4157.45	3722.26	6306.57	8376.38	4770.75	4726.33	6886.41	5572.68	6315.8	4312.05	7000.56	3766.42
M178T193	[M-H]-	Hippuric acid	5.15041	0.622581	0.586418	178.051	192.836	1.27414	HMDB0000714	C01586	Benzenoids	Benzene and substituted derivatives	Benzoic acids and derivatives	198.808	10	10	7140	76804.5	738075	168834	653570	56379.6	1.00272e+06	81892.5	16292.8	1.12552e+06	277812	508517	32662	999682	5.73284e+06	296383	84046.7	70035.7	75292.7	1.70336e+06	159314	373768	2.20925e+06	49010.6	91992.8	43638.7	13642.9	191402	63400.1	64625.7	17798.6	162550	345866
M241T99	[M-H]-	His-ser	3.15038	0.675099	0.34386	241.083	98.5375	0.334177	HMDB0000273	C00214	Nucleosides, nucleotides, and analogues	Pyrimidine nucleosides	Pyrimidine 2'-deoxyribonucleosides	100.716	10	9	118926	322317	44507.5	237620	1.33268e+06	764987	348263	473065	26735.3	326051	799045	261585	172005	1.2124e+06	1.60084e+06	504157	517017	607265	378169	1.56761e+06	433657	454879	867880	387721	842032	224309	34500.4	324082	262679	415292	362358	315832	178237
M181T302	[M-H]-	Homovanillic acid	0.93292	0.726992	0.428952	181.071	301.592	4.05277	HMDB0000118	C05582	Benzenoids	Phenols	Methoxyphenols	309.195	10	10	28125.3	24948.9	16049.5	74354	102332	31150.4	57922.5	96565.1	23935.1	83052.5	57709.1	56062.6	11577.8	93399.7	248729	272848	32874.7	61355.1	41808.6	103378	42358.2	47055.1	68365.2	19856.2	67887	29591.1	16225.7	93256.9	12443.4	57142.8	25886.5	73358.3	64441.4
M261T249	[M-H]-	Homovanillic acid sulfate	0.186062	0.993976	0.99261	261.008	248.791	1.12335	HMDB0011719		Organic acids and derivatives	Organic sulfuric acids and derivatives	Arylsulfates	256.633	9	9	38449.5	13275.8	451136	6992.37	215695	19204.9	50255	29421.3	3659.41	36499.9	8915.23	32097.9	1228.46	48379.9	211432	15688.5	6673.29	2490.01	6183.06	71693.1	6800.3	15992.2	52674.9	958.923	5628.59	2190.47	29208.8	8904.12	3587.4	62689	3995.38	47796.5	10379.7
M361T26_2	[M-H]-	Humulone	0.905406	1.21294	0.338416	361.204	26.429	8.4166		C10695	Organic oxygen compounds	Organooxygen compounds	Carbonyl compounds	28.496	9	8	65958.9	175646	104862	65010.8	105383	85831.9	49114.6	68181.7	22104.6	75859.2	52139.2	63447	112353	74742	28521.6	103042	82035.7	70641.6	60511.1	68191	99529.8	101308	23013.3	60872	220997	156533	100810	49537.1	76099.5	133517	110857	89848.8	64522.4
M195T152	[M-H]-	Hydroferulic acid	1.21441	1.68863	0.362551	195.066	151.661	3.23631	HMDB0062121					165.27	10	10	42443.5	59059.1	184903	70870.6	60224.9	96539.9	158048	63738.2	29520	82371.8	167248	279039	68955	48749.2	77658.5	333401	61930.8	54525.4	108754	28873.2	265807	36399.4	206261	83776.4	115334	34725.7	44897.9	99215.4	114152	281631	54671.3	86178.6	611719
M325T28	[M-H]-	Hydroquinidine	3.213	0.840491	0.653909	325.184	28.217	0.0049296		C10696				30.394	10	10	823754	1.06177e+06	1.03509e+06	1.47307e+06	946159	3.15429e+06	1.21121e+06	1.68748e+06	1.17472e+06	1.70639e+06	1.78846e+06	1.59395e+06	2.2151e+06	8.23272e+06	1.37534e+06	1.3594e+06	1.90392e+06	3.07943e+06	1.72323e+06	1.10676e+06	1.46264e+06	1.64435e+06	1.192e+06	2.45859e+06	2.11619e+06	1.59772e+06	2.70122e+06	2.12867e+06	1.751e+06	1.43858e+06	2.05977e+06	1.17829e+06	2.08541e+06
M109T25	[M-H]-	Hydroquinone	1.72211	1.06701	0.928615	109.029	25.4825	1.43122	HMDB0002434	C00530	Benzenoids	Phenols	Benzenediols	27.601	9	9	808778	33411.5	950630	60469.8	808595	26938.9	615432	20789	12754	251961	151464	106945	6564.69	678989	872142	164002	54641	28120.4	43432.4	781941	99958.7	212781	609751	20223.3	86533	11089.4	32995.1	88881.9	25401.3	37722.1	13000.2	82609.8	173603
M474T59	[M-H]-	Hydroxycerivastatin	0.347318	0.767787	0.283318	474.218	58.558	4.71681			Organoheterocyclic compounds	Pyridines and derivatives	Phenylpyridines	71.021	9	8	36819.3	23906.8	39066.5	45952.3	24699.2	72908.9	131065	33986.2	6053.62	74234.3	11045.5	52073.1	66170.1	38076.2	87876.1	41911	44983.3	45961.1	29383.7	39013.4	51649.5	21922.1	52507.4	17837.5	36362.1	51964.8	61927.4	43435.5	64620.1	83727.8	88458.5	32181.6	44377.1
M131T134_2	[M-H]-	Hydroxyisocaproic acid	6.98975	1.24394	0.502955	131.071	133.525	1.15701	HMDB0000665		Lipids and lipid-like molecules	Fatty Acyls	Fatty acids and conjugates	140.036	10	10	622952	4.64465e+06	8.02819e+06	1.26772e+07	4.64714e+06	2.16969e+06	5.60012e+06	8.6944e+06	967009	3.53511e+06	4.42968e+06	3.38095e+06	455307	2.72038e+06	5.65628e+06	2.15671e+06	1.52722e+06	3.45567e+06	4.24783e+06	2.29412e+06	7.35246e+06	2.44686e+06	1.90749e+06	2.95051e+06	1.55776e+06	615341	5.03505e+06	9.30297e+06	1.55688e+06	5.48737e+06	277593	1.01171e+07	4.24883e+06
M181T190	[M-H]-	Hydroxyphenyllactic acid	0.421985	0.811446	0.488727	181.051	190.42	3.02307	HMDB0000755	C03672				196.088	10	10	27531	36621.2	23175.3	66136.1	29274.2	19022.7	137490	50194.7	19276.8	169308	87992.9	86087	15920	19924.7	110402	33080.4	28184.9	26799.9	149637	24351.9	89462.6	25350.1	49563.4	81190.8	16608.3	13559	34746.9	96701.2	24276.7	133613	18146	78669.4	34484.3
M189T378	[M-H]-	Hydroxysuberic acid	0.253372	1.26069	0.304081	189.077	378.056	1.81705	HMDB0000325		Organic acids and derivatives	Hydroxy acids and derivatives	Medium-chain hydroxy acids and derivatives	386.591	10	10	30629.2	11370.3	16646.1	6624.23	9972.16	5089.53	6740.14	9042.09	2402.11	4930.71	3626.77	10899.4	3948.4	5166.08	10087.4	6160.45	4876.18	3661.06	3540.64	7200.14	4194.36	7180.94	4245.38	4931.35	7919.18	10876.6	8524.15	4428.21	6014.57	5136.7	5878.76	9586.82	2774.84
M323T29	[M-H]-	Hymeglusin	0.481374	0.857138	0.507656	323.169	29.2	2.02731			Lipids and lipid-like molecules	Fatty Acyls	Fatty acids and conjugates	46.496	4	6	27699.1	14390.2	20539.8	25291.7	14983.8	51224.8	22663.5	38018.6	20407.9	29775.8	27158.4	34376	37727	93712.4	32342	54664.9	39114.7	54379.4	30298.7	27836.2	37366.2	35003.3	26727.8	52801.5	42746	25418	36057.4	49719.2	28721.5	40327.6	29708.5	37857.7	40435.2
M286T339	[M-H]-	Ile-Arg	0.0574497	0.702828	0.321358	286.188	339.196	0.79288			Organic acids and derivatives	Carboxylic acids and derivatives	Amino acids, peptides, and analogues	343.653	6	7	3788.8	5136.46	8123.38	4481.35	17939.9	2972.27	3147.16	2825.11	4330.26	4154.77	4625.4	1501.88	3057.3	8287.65	4180.36	2928	2410.94	3538.52	4820.38	17612.1	3690.78	5004.57	3098.39	2994.11	22672.4	1857.29	4805.12	10811.8	2934.92	1986.31	3993.23	4554.65	3009.24
M245T254	[M-H]-	Ile-Asp	0.214492	0.970874	0.896492	245.114	253.952	1.50089			Organic acids and derivatives	Carboxylic acids and derivatives	Amino acids, peptides, and analogues	256.046	8	8	20506.5	16917.7	54679.7	16291.9	36549.7	27085	12732.2	17415.4	27471.1	15458.6	18936	16386	16161.1	19300.9	23547.4	17177.1	12735.5	21593.4	27653.1	34949.7	14373.6	18294.3	13760.8	13173.1	62481.7	11703.5	19710.5	15931.5	14041.7	15806.6	19914.3	26529.6	9234.89
M243T188	[M-H]-	Ile-Leu	0.783779	0.779071	0.191055	243.171	188.426	2.00974			Organic acids and derivatives	Carboxylic acids and derivatives	Amino acids, peptides, and analogues	192.828	10	10	39255.3	79989.7	130170	142247	204892	199749	73952.5	124547	54914.8	193614	152303	63663.1	53933	226981	121874	78656	140603	209938	109631	323968	100695	176198	94276.2	77981	417447	67589	67724.2	252944	62503.2	129303	103057	172028	97938.1
M229T201	[M-H]-	Ile-Val	1.24909	0.808013	0.393864	229.156	201.477	1.18317			Organic acids and derivatives	Carboxylic acids and derivatives	Amino acids, peptides, and analogues	207.227	10	10	54191.3	80514.9	144096	197815	221629	416406	91766.6	204590	49587.5	281943	225973	66081.5	63793.2	330154	187864	123600	219578	351007	138930	563953	151338	263210	139491	118647	705857	97690.3	99983.9	458157	86825.5	215240	128591	249767	173156
M114T391	[M-H-H2O]-	Iminodiacetic acid	0.187341	1.17346	0.7224	114.019	390.993	1.767	HMDB0011753		Organic acids and derivatives	Carboxylic acids and derivatives	Amino acids, peptides, and analogues	410.258	10	10	8962.37	3035.95	25095.6	5339.7	11277.5	852	2453.67	3906.6	9973.01	3000.81	4069.16	3679.04	1343.07	6170.79	5350.9	1400.57	1465.06	1589.39	1657.14	4665.72	1983.05	2017.82	1142.7	1794.29	5337.4	1691.36	7428.26	3497.43	3146.71	2910.35	1126.36	9878.76	1685.81
M612T366	[M-H]-	Indinavir	0.166762	0.602298	0.106077	612.373	366.045	1.42051	HMDB0014369	C07051	Organic acids and derivatives	Carboxylic acids and derivatives	Amino acids, peptides, and analogues	370.061	9	9	794.855	916.924	11809	7339.16	10021.3	8589.62	2505.75	4087.72	6240.96	7195.93	8471.9	665.352	380.849	16837.7	4906.83	1523.13	4669.09	11122.3	9988.46	13981.4	1054.24	15990.6	3067.23	607.591	24266.9	814.49	7146	9332.57	783.451	5082	4324.05	10946	3487.52
M116T162	[M-H]-	Indole	0.285488	0.98043	0.965748	116.05	162.088	3.03527	HMDB0000738	C00463	Organoheterocyclic compounds	Indoles and derivatives	Indoles	174.633	9	9	302801	8338.14	111379	33483.8	58133.1	22935.5	37232.8	23380.3	11625.8	14639.9	21655.4	10341	2737.42	36233	61911.7	19785.5	9556.79	27719.6	13617	35541	19485.4	11476.7	22421.8	7325.37	19715.6	4667.9	87945.8	21687.3	6462.13	20503	2679.87	30745.3	15582.2
M287T207	[M-H]-	Indole-3-acetyl-l-isoleucine	0.219778	0.962027	0.808064	287.161	207.084	2.36883			Organic acids and derivatives	Carboxylic acids and derivatives	Amino acids, peptides, and analogues	225.449	9	6	11429.2	8234.96	9833.33	19178.4	10650.2	23309.4	15253.9	15012.2	8411.89	16211.4	12254.1	6342.64	13123.6	10297.7	17668.4	7817.62	9584.32	12946	9638.09	14737.2	20505.6	9725.96	8609.86	9029.26	19000.8	6773.03	10873.4	22193.6	12209.7	12425.9	7891.13	13668.2	8642.93
M144T38	[M-H]-	Indole-3-carboxaldehyde	0.725795	0.891878	0.705113	144.045	38.313	2.467	HMDB0029737	C08493	Organoheterocyclic compounds	Indoles and derivatives	Indoles	39.646	10	10	465525	268384	678253	240591	436362	209026	153011	203392	390849	148298	192208	187582	86710.6	251102	281437	142284	124698	174085	150527	148397	171349	149791	187066	90679.5	148786	49151.7	575048	201872	110970	156353	104774	403085	194496
M204T156	[M-H]-	Indolelactic acid	0.197858	1.09181	0.744562	204.067	155.613	0.486999	HMDB0000671	C02043	Organoheterocyclic compounds	Indoles and derivatives	Indolyl carboxylic acids and derivatives	166.925	10	10	24492.9	140503	65497.5	115738	77014.6	31192.7	100317	92796.8	14051.4	128475	87691.9	151063	31929.4	29267.2	113074	28993.6	30349.9	48353.9	142116	28863.9	67250.3	34588.8	46537.4	40192.2	32015.6	11124.6	125243	88718.6	53525.7	151706	6163.23	125549	63290.6
M212T29	[M-H]-	Indoxyl sulfate	14.4496	0.560668	0.379393	212.003	28.816	0.968205	HMDB0000682		Organic acids and derivatives	Organic sulfuric acids and derivatives	Arylsulfates	31.47	10	10	6.21793e+07	1.15018e+06	1.96631e+07	1.66232e+06	1.98913e+07	549602	2.17269e+07	641696	347309	1.37088e+07	4.60953e+06	5.0672e+06	321152	1.4833e+07	6.02626e+07	4.20536e+06	3.0715e+06	577258	854881	3.78728e+07	1.54231e+06	6.40729e+06	1.43182e+07	528940	771260	397510	1.84281e+06	2.41333e+06	669925	759677	196530	2.37957e+06	3.92025e+06
M146T196	[M-H]-	Isatin	0.366262	0.90697	0.788499	146.025	196.22	1.71322	HMDB0061933	C11129	Organoheterocyclic compounds	Indoles and derivatives	Indolines	202.248	10	10	205319	38319.1	121430	56612.4	102137	30100.3	39999.8	38989.6	55878.9	26158.2	32209.1	22473.4	5851.08	26968	35873	21987.7	28925.4	39811.1	14263	27567.7	21686.8	13024.1	26503.5	19305.3	55864.3	3264.9	175484	17874.7	11994.9	15515.2	19928.8	65299.4	27262.3
M144T385	[M-H]-	Isobutyrylglycine	0.336427	1.00742	0.986767	144.066	384.592	2.75895	HMDB0000730		Organic acids and derivatives	Carboxylic acids and derivatives	Amino acids, peptides, and analogues	386.95	10	10	39030.4	19479.1	50225.2	6708.33	33638.4	3694.27	6320.82	6440.77	36808	6212.71	9364.72	11085.8	4721.34	16299.6	16438.2	3439.19	3760.88	4054.03	3319.68	12040.4	4376.58	4041.03	4567.82	1952.45	10833.9	3791.36	32874.5	4003.92	4709.72	6833.87	3219.28	12071.4	4885.38
M373T60	[M-H-H2O]-	Isodeoxycholic acid	0.990568	1.05898	0.730521	373.275	60.164	3.27458	HMDB0002536	C17661	Lipids and lipid-like molecules	Steroids and steroid derivatives	Bile acids, alcohols and derivatives	61.548	10	10	912134	300795	638072	324928	427144	236311	146371	383888	348767	157992	357604	124820	224472	473014	533827	180278	286965	365286	111328	470637	318817	162384	630249	161431	394660	224915	862212	208512	171898	170610	306562	139260	305729
M217T31_2	[M+Cl]-	Isoevernic acid	1.31851	0.751899	0.604117	217.017	30.786	0.183898			Benzenoids	Benzene and substituted derivatives	Benzoic acids and derivatives	43.967	9	7	130146	48044.6	402522	248266	411653	6593.92	310751	17979.8	23125.2	209247	95772.4	92193.9	19908.3	228919	823091	87121.4	56339.1	27309.1	24565.4	422438	45230.2	91902	259871	19328.7	28672.1	13555.9	29710.4	50516.8	15581.8	24743.9	17320	75935.6	42958.4
M242T36	[M-H-CH3]-	Isogentisin	3.49479	0.487341	0.343014	242.028	35.61	1.73523	HMDB0030871	C10070	Organoheterocyclic compounds	Benzopyrans	1-benzopyrans	49.164	6	5	204949	3727.29	577249	189178	172365	230186	477672	155412	39970.3	178029	215487	126834	224606	506603	3.27299e+06	168343	315593	150608	233184	653121	225751	138072	242435	224882	54190.2	139285	23653.2	222457	202574	136712	351921	109052	244672
M383T202	[M-H]-	Isorhynchophylline	0.171759	0.942783	0.522134	383.207	202.18	2.28247		C16980				216.275	10	9	19488.7	25114.7	17499.4	30899.9	19936.4	32677.8	36909.3	33743.6	27877.4	55731.7	36516.2	51828	33294.4	27734.9	38008.6	31971.6	37774.9	34515.3	41516.5	32305	38775.9	26246	33998	34909.6	29734.1	32117.4	22533.4	23873	29913.4	29469	50678.1	32047.3	25508.8
M101T100_2	[M-H]-	Isovaleric acid	1.07361	0.994207	0.983606	101.061	100.115	1.39909	HMDB0000718	C08262	Lipids and lipid-like molecules	Fatty Acyls	Fatty acids and conjugates	102.346	10	10	1.44615e+06	1.03878e+06	3.272e+06	603799	1.32355e+06	592233	532022	672511	1.1036e+06	421835	2.59569e+06	492999	929233	1.66313e+06	535285	715852	1.08305e+06	1.524e+06	458374	1.79676e+06	496893	931324	402867	309110	2.03225e+06	378364	2.44424e+06	603002	415101	835841	1.09058e+06	1.41533e+06	643865
M158T198	[M-H]-	Isovalerylglycine	1.30575	0.750961	0.500053	158.082	198.012	1.28604	HMDB0000678		Organic acids and derivatives	Carboxylic acids and derivatives	Amino acids, peptides, and analogues	202.311	10	10	49375.9	123691	495337	63055.5	208590	119287	307068	132833	329278	204758	113186	150878	13644.8	473049	900305	113170	53234.8	35102.1	96383.6	458592	56103.2	116687	400941	48801.3	91048.3	24383.5	200420	214874	23329.3	58785.3	54889.3	155371	202009
M485T178	[M-H]-	Kendomycin	1.26589	0.916638	0.712625	485.291	178.184	1.70231						182.692	10	10	236521	380177	150486	62733.6	254928	65075.3	219638	124274	202898	137662	78105.6	325845	199165	75606.3	96745.7	83941.3	76866.1	62037.3	119964	79694	175649	188656	92555.4	118726	85436	293049	129884	43052.9	199467	120408	298684	154506	87434.5
M529T75	[M-H]-	Kukoamine a	4.59317	0.82897	0.563859	529.284	74.8535	1.12655	HMDB0030392		Benzenoids	Phenols	Benzenediols	89.689	10	10	1.95518e+06	5.75537e+06	1.17487e+06	2.22987e+06	1.65442e+06	1.86036e+06	4.3558e+06	4.79825e+06	4.26561e+06	3.748e+06	2.89676e+06	5.31646e+06	1.07081e+07	1.56203e+06	3.48358e+06	2.2283e+06	2.32111e+06	3.00971e+06	5.03352e+06	2.08437e+06	5.44709e+06	3.13038e+06	1.39515e+06	3.56303e+06	1.97063e+06	8.89452e+06	1.49412e+06	2.80231e+06	4.49586e+06	4.63153e+06	4.58315e+06	2.46219e+06	2.53432e+06
M343T274	[M-H]-	Lactitol	0.456838	1.66619	0.10575	343.124	273.693	0.817635			Lipids and lipid-like molecules	Fatty Acyls	Fatty acyl glycosides	275.256	7	8	5884.18	16495.4	45620.3	14702.3	17123.6	9655.09	12116.4	13765.5	4584.13	8455.98	11573.1	9010.43	9242.64	8374.71	18419.7	6968.4	7848.8	9918.91	8221.99	11768.9	11884.1	6872.31	17482.2	12356.2	6579.04	6460.14	12826.6	9411.54	5838.51	8834.6	8146.23	10524.1	11935.6
M455T31	[M-H]-	L-alaninamide, n-[2-[2-(hydroxyamino)-2-oxoethyl]-4-methyl-1-oxopentyl]-3-(2-naphthalenyl)-l-alanyl-	0.283522	1.02595	0.88276	455.211	31.1355	0.880441			Organic acids and derivatives	Carboxylic acids and derivatives	Amino acids, peptides, and analogues	51.886	8	9	44221.7	100619	68882.3	46783	24333.3	103390	34433.4	94125.3	69572.5	44396.6	69118.6	44496.6	71705.1	43926.5	46472.7	84654.5	59440	44537.3	59582	43556.4	82601.4	95348.7	28823.1	54716.7	72910.1	58483.4	11982.9	111753	32749.8	45202.4	96772.1	110782	42013.7
M147T264_2	[M-H]-	L-Arabinono-1,4-lactone	0.598937	0.90879	0.767603	147.045	264.012	8.3307		C01114				272.259	9	10	22688.9	106234	255854	119620	353583	179268	6828.06	180338	41706.4	96577.2	55963.4	43686	5460.09	179964	73334.4	40684.2	62386.1	177244	138799	227622	40794.4	161366	27605.9	1649.42	286998	13165.1	69810.6	168293	8638.01	80853.3	12996.3	195403	58495.9
M451T70	[2M-H]-	L-carnosine	0.206412	1.03117	0.8865	451.215	69.989	0.2713	HMDB0000033	C00386	Organic acids and derivatives	Peptidomimetics	Hybrid peptides	80.389	7	5	9475.48	103291	26057.4	49182.6	40431.6	25482.1	109355	35740.1	29579	9925.91	46866.8	127039	46604.6	33681.6	47867.5	78359.3	47008.4	6426.86	61209.2	37107.8	88123.3	58161.9	24777.9	37784.3	36786.4	39623.9	28066	26250.6	30254.2	76469	75689.1	38339.7	31954.4
M168T204	[M-H]-	L-Cysteic acid	0.141607	0.718099	0.0786215	167.997	203.554	0.92525	HMDB0002757	C00506	Organic acids and derivatives	Carboxylic acids and derivatives	Amino acids, peptides, and analogues	210.107	10	10	7871.89	6448.5	4706.38	8374.01	5621.82	5837.03	7702.38	8184.32	17473.7	7650.43	6867.29	9279.84	10652	6351.69	11107.6	7644.54	7484.99	6972.38	6598.23	4786.96	8105.43	3363.02	8229.41	7460.96	3901.83	4358	5438.06	6311.25	7769.52	6613.78	8552.39	4809.86	5474.93
M157T186_2	[M-H]-	L-dihydroorotate	3.67555	0.522251	0.551543	157.036	185.794	2.29075	HMDB0003349	C00337	Organic acids and derivatives	Carboxylic acids and derivatives	Amino acids, peptides, and analogues	191.168	10	10	13488.8	24056.9	16580	75395	81916	30257.7	439352	34058.6	20144.5	403546	132546	181898	11780.2	338797	2.60022e+06	113557	79374.9	23309.7	28815	943746	46654	115704	611837	24775.7	43513.4	24739.9	10246.9	85809.8	24727.7	27271.2	9486.7	60515.2	133920
M295T303	[M-H-CH3]-	Leonurine	0.361211	1.00768	0.97271	295.121	302.516	0.295891		C16985	Benzenoids	Benzene and substituted derivatives	Benzoic acids and derivatives	308.325	10	10	13867.1	8375.16	13570.1	51116.7	12308.5	21748.7	23051.6	32318.5	15517.6	24415.6	17788.3	14541	20443.8	15898	33683.7	20623.3	28720.6	21747	18471.5	35565.7	22504.6	15445.5	26124.3	23085.4	18224.3	38741.8	7939.23	27119.1	26076.3	19447.3	24894.7	15114	8820.91
M244T171	[M-H]-	Leu-Gly-Gly	0.344794	1.23397	0.4156	244.119	171.259	6.42187			Organic acids and derivatives	Carboxylic acids and derivatives	Amino acids, peptides, and analogues	178.875	5	8	22289.2	7848.43	26813.1	11658.9	22775.4	47374.2	22593	15758.6	11613.3	21718.7	16290.5	25095.1	16987.3	16871.1	19644.3	41538.6	32695.7	7943.94	28021	16565.3	8608.4	18494.6	8398.67	919.903	14969.1	15675.3	19334.7	8192.97	16740.5	7683.72	36394.6	13974.8	13286.5
M243T219_2	[M-H]-	Leu-Ile	0.259131	0.86689	0.254382	243.16	219.091	3.1098			Organic acids and derivatives	Carboxylic acids and derivatives	Amino acids, peptides, and analogues	228.595	10	10	29801.3	85715.1	67448.4	71925	103837	70413.5	36562.9	63249.1	118011	51758.2	58564.7	67178.6	57331.5	75441.9	73546.8	29186.8	56916.2	83237.8	66553.5	75823.3	74727.5	60754.6	57596.4	43435.3	103770	75340.3	73370.8	68585.1	56497.9	48842.9	88481.2	89361.2	46814.3
M500T186	[M-H]1-	Leukotriene d4	0.617829	0.680839	0.149419	500.27	186.339	3.33012	HMDB0003080	C05951	Lipids and lipid-like molecules	Fatty Acyls	Eicosanoids	190.932	6	7	13507.6	58893.9	9097.12	18472.5	24263.9	18261.7	25087.2	21160.7	22484.3	30326.8	20192.3	107138	38863.8	15626.6	30310	20360.3	16286.8	21889.7	23575.8	24294.7	33409.8	16229.7	17059.6	18901.8	21064	18233.4	14407.6	10392.1	21841.3	30003.8	67579.4	58506.4	13295.6
M567T35_2	[M-H]-	Leukotriene f4	1.6846	1.88964	0.381172	567.264	34.7805	0.232358		C06462	Lipids and lipid-like molecules	Fatty Acyls	Eicosanoids	52.626	10	10	106132	1.14662e+06	54711.3	112313	137477	96328.6	124523	102981	83625.3	99176	55571.8	145079	189611	51122.3	55857.5	99979.7	77160.6	62699.3	120268	46453	117784	123666	40118.8	98918.2	64414.8	157436	122808	55928.2	116493	107245	142356	121658	65963.5
M316T50	[M-H-CO2]-	Levofloxacin	0.625425	0.843183	0.638468	316.123	49.8075	3.12552	HMDB0001929	C07660	Organoheterocyclic compounds	Quinolines and derivatives	Quinoline carboxylic acids	62.891	8	7	61827	17644.4	17736.5	5054.42	26372.5	70427.1	29974.6	23057.3	6689.46	28975.4	11715.3	26184.4	108188	32925.5	133835	8388.53	86878.5	13926.1	13940.4	40815	86910.6	51595.6	38840.1	79040.4	56318	52486.7	14580.7	69371.2	85238.2	46958.4	28864	68019.8	66614.6
M243T219_1	[M-H]-	L-fucose-1-phosphate	0.213389	0.815389	0.498849	243.018	218.63	2.44875	HMDB0001265	C02985				223.926	9	5	48971.9	5114.74	20626.7	5774.14	12902.1	6782.52	10529.2	8604.18	7339.26	8666.52	9238.92	11813.6	8955.44	7379.02	35786.7	12993.1	6379.85	6081.52	6087.35	11459.8	7234.8	7165.98	11672.2	7150.2	5556.84	9361.72	5927.54	8520.39	8325.08	8257.15	426.974	6738.15	6312.41
M177T154	[M-H]-	L-gulono-1,4-lactone	0.910357	1.19764	0.60774	177.04	154.341	4.79801	HMDB0003466	C01040	Organoheterocyclic compounds	Lactones	Gamma butyrolactones	167.928	7	7	46440.2	23490.9	13798.6	133347	27524	149664	46953.6	119256	6961.66	32796.9	29665.1	63479.6	14055.8	72302	57540.5	64392.6	65107.2	97160.8	130743	104751	80014.6	34490.1	74150.5	81919.7	63592.6	37729.7	20401.4	118887	61355.5	42312.4	38581.3	153741	72147.6
M377T164	[2M-H]-	L-homocitrulline	0.872296	0.610001	0.00964867	377.232	163.968	7.83193	HMDB0000679	C02427	Organic acids and derivatives	Carboxylic acids and derivatives	Amino acids, peptides, and analogues	175.893	7	8	225225	40321.2	83622.5	12581	31493.4	103885	101380	56226.1	86096.1	86942.4	134162	130131	130654	115803	132377	37847.3	69044.2	59951.2	46426.2	23554.4	70238.6	54634	97560.1	108236	137438	49527.9	21222.6	91823.2	96102.5	56356.6	224626	72889.8	101001
M182T207	[M-H]-	L-homocysteic acid	0.111403	0.839728	0.539131	182.013	207.111	3.09176	HMDB0002205	C16511	Organic acids and derivatives	Carboxylic acids and derivatives	Amino acids, peptides, and analogues	212.987	8	7	15199.5	5427.73	28950.8	9261.64	18685.8	13177	22593.1	15436.5	12111.1	13562.2	10072.1	33782.3	9151.63	6024.56	37461	9743.95	10444.7	10359.6	10838.6	6854.31	4772.98	6931.05	10575.4	9485.75	7879.22	8245.45	12650.7	12494.3	9930.5	4560.51	10301	18740.8	4210.35
M379T36	[M-H]-	Limaprost	0.748603	1.35748	0.372086	379.252	36.2025	1.32664			Lipids and lipid-like molecules	Fatty Acyls	Fatty acids and conjugates	47.868	10	10	345139	257888	16341.1	182907	47658.1	168757	153679	229722	66129.4	159819	300165	257170	568318	66731.5	149432	445266	353647	96132.6	113253	44772.7	196882	31690.5	122774	405175	37179.3	374581	137380	126346	506672	281616	273492	98523.3	167455
M405T26_2	[M-H]-	Lincomycin	2.94956	1.43656	0.425932	405.195	26.3715	1.5505		C06812	Organic acids and derivatives	Carboxylic acids and derivatives	Amino acids, peptides, and analogues	31.855	10	10	53855.7	63408.4	51061.7	342484	48853.9	1.7511e+06	332795	995835	58344.6	407354	754292	190166	232677	306408	198986	629325	996783	412344	260696	289375	1.22395e+06	508550	843551	1.07719e+06	230382	328688	134747	1.0628e+06	1.06612e+06	808566	626417	434036	711522
M279T48	[M-H]-	Linoleic acid	13.5621	0.994908	0.973975	279.233	47.829	3.44398	HMDB0000673	C01595	Lipids and lipid-like molecules	Fatty Acyls	Lineolic acids and derivatives	48.815	10	10	9.5586e+07	6.1571e+07	8.96182e+07	5.82459e+07	1.22553e+08	7.18769e+07	6.16755e+07	6.19497e+07	7.26775e+07	1.03603e+08	7.94069e+07	8.46397e+07	3.85015e+07	2.4391e+07	6.30391e+07	5.35282e+07	6.38326e+07	1.02856e+08	6.47682e+07	6.05964e+07	8.19841e+07	9.14753e+07	4.88299e+07	7.21009e+07	1.09665e+08	5.16225e+07	1.14561e+08	6.37022e+07	7.0871e+07	5.29149e+07	4.87165e+07	5.36927e+07	1.04927e+08
M277T48_3	[M-H]-	Linolenic acid	6.69522	1.15896	0.397598	277.218	48.49	1.79075	HMDB0001388	C06427	Lipids and lipid-like molecules	Fatty Acyls	Lineolic acids and derivatives	50.105	10	10	4.85521e+06	6.61927e+06	7.32185e+06	3.21124e+06	6.76104e+06	3.92499e+06	2.94886e+06	2.57209e+06	2.31163e+06	4.44765e+06	2.67231e+06	3.14407e+06	3.92489e+06	2.80454e+06	1.94047e+06	2.5844e+06	2.92017e+06	3.23612e+06	2.36789e+06	4.16633e+06	2.79918e+06	4.34851e+06	2.2806e+06	3.32857e+06	5.91462e+06	4.45145e+06	6.57758e+06	2.89517e+06	2.10917e+06	4.48034e+06	3.42167e+06	2.86013e+06	3.79073e+06
M336T118	[M-H]-	Linoleoylglycine	0.865247	1.69052	0.200009	336.254	117.697	1.88315			Organic acids and derivatives	Carboxylic acids and derivatives	Amino acids, peptides, and analogues	125.066	10	10	44331.1	17587.8	100256	29839.8	40553.4	33830.4	20392.4	32929.6	12396	19098.4	9499.39	51804.1	5588.99	12381.7	15861.3	17807.1	13851.8	20038.2	14119	19118.1	28172.7	22113.5	9755.92	15682.2	14760.2	15615.3	46193.6	34308.1	7982.41	18151.3	12494.1	13277.6	14668
M375T82	[M-H]-	Lithocholic acid	5.0092	0.685293	0.206498	375.29	81.595	0.781006	HMDB0000761	C03990				83.479	10	10	221983	1.73125e+06	288215	782484	2.85048e+06	1.1515e+06	1.36053e+06	1.79857e+06	3.41641e+06	3.52244e+06	1.91494e+06	2.23422e+06	6.40986e+06	1.09019e+06	1.88856e+06	1.74989e+06	1.66403e+06	1.46971e+06	1.85985e+06	1.11158e+06	2.96907e+06	1.71572e+06	1.5565e+06	2.43325e+06	945351	4.49989e+06	502494	1.92039e+06	3.0445e+06	1.50695e+06	5.38042e+06	1.29361e+06	1.61976e+06
M742T420	[M+Cl]-	Lnnt	0.103826	1.18005	0.652973	742.229	420.269	0.100067			Organic oxygen compounds	Organooxygen compounds	Carbohydrates and carbohydrate conjugates	423.933	6	8	1856.63	2621.69	1339.67	3627.29	2304.96	2460.62	1603.18	3096.86	3978.11	3383.18	3903.59	2115.46	2924.46	4859.89	2455.33	3605.73	3031.9	2706.22	4509.13	3203.93	3068.01	3328.89	3229.88	1482.82	2622.34	2421.25	2456.84	2533.5	2394.3	1968.94	3368.67	4881.81	2431.44
M421T271	[M-H]-	Lovastatin hydroxy acid	0.664125	0.990528	0.971909	421.259	271.31	0.45045		C21130	Organic acids and derivatives	Hydroxy acids and derivatives	Medium-chain hydroxy acids and derivatives	272.938	10	10	25004.9	111778	31004.8	14272.3	67515.7	17137.4	23399.4	48657	59850.8	36828.7	23205	41150.4	50260.1	19433.8	29068.5	26160.2	15134.8	31573	28016.1	20712.5	33305.8	22115.8	18948.6	17810.3	20598.6	68980.3	38316.4	16708	26299	30724.8	34455.6	65782.3	19676
M349T357	[M+Cl]-	Loxistatin acid	0.0995379	0.825628	0.34308	349.161	356.793	3.44585			Organic acids and derivatives	Carboxylic acids and derivatives	Amino acids, peptides, and analogues	361.131	6	5	7530.08	2818.02	4640.07	2445.48	3602.09	3048.78	3851.12	2495.79	2929.11	4004.19	3065.31	5033.74	1765.28	2767.34	8827.26	1826.9	2853.52	2362.54	2314.08	2693.16	1451.71	2888.69	2738.52	5013.29	2409.25	3546.35	1891.53	2610.25	5846.71	2422.71	6768.14	5165.86	2017.72
M476T172	[M-H]-	Lpe 18:2	2.85583	1.29697	0.272249	476.278	171.64	1.16941			Lipids and lipid-like molecules	Glycerophospholipids	Glycerophosphoethanolamines	175.893	10	10	792032	1.32768e+06	2.14258e+06	369995	1.73596e+06	1.89481e+06	619366	952879	173816	1.01477e+06	781540	944836	360066	950777	986598	795729	1.43911e+06	344481	301828	829657	1.03417e+06	1.1941e+06	675484	527789	751591	262055	1.331e+06	1.37975e+06	482181	764501	318803	729144	1.48652e+06
M629T218	[M-H]1-	Ltc4-[d5]	0.533089	0.693529	0.172773	629.331	217.739	0.424976	HMDB0001198	C02166	Organic acids and derivatives	Carboxylic acids and derivatives	Amino acids, peptides, and analogues	235.135	10	10	55809.3	63275.8	61941.7	25507	82089.1	28791.5	52294.5	26098.7	106963	49811.5	39676.1	76136.2	33222.8	49162.1	72879	19087.3	22056.7	23024	34521.9	62757.1	28734	37219.8	31014.4	23262.1	18490.4	19854.2	80981.9	17687.4	18832.2	18054	24059.1	45372.5	21669.8
M135T347	[M-H]-	L-threonate	0.323789	1.09675	0.858721	135.03	347.298	0.141591	HMDB0000943	C01620	Organic oxygen compounds	Organooxygen compounds	Carbohydrates and carbohydrate conjugates	356.474	5	7	45173.1	2281.91	39079.7	9899.98	15911.8	12210.8	10551.2	12316.9	3915.59	10634.9	7440.79	11943.5	4513.23	23080.6	13720.1	8627.39	6422.03	2957.41	5189.09	22379	7802.82	5257.71	14497.5	5985.48	8289	4059.46	26285.8	871.975	5018.97	14348.6	4801.89	4100.58	7703.04
M503T168	[M-H]-	Madecassic acid	0.932976	0.973882	0.915737	503.337	168.356	1.60029			Lipids and lipid-like molecules	Prenol lipids	Triterpenoids	174.383	10	10	140172	238677	134192	41584.7	201394	48423.3	65035.6	120454	112098	132543	69833.7	127921	115438	47873.7	58503.1	48842.9	76170.7	74498.4	87152.3	90398.9	191293	76329.3	47173	54529.2	128070	221751	220907	118984	157186	140793	65617.5	131894	48850.1
M1020T192	[M+FA-H]-	Madecassoside	0.132805	0.75305	0.241702	1019.51	192.428	0.682955			Lipids and lipid-like molecules	Prenol lipids	Terpene glycosides	198.808	4	5	1273.46	1171.99	922.247	2386.95	1381.02	2515.43	4301.61	3987.36	2418.9	4216.76	2811.25	1091.71	1876.16	6429.84	3882.73	2440.34	4351.51	2612.47	2274.95	1940.92	3077.5	3097.65	2585.6	1901.33	10708.6	3612.45	1217.46	3592.12	2780.36	5714.21	3300.74	2329.57	1863.99
M265T109	[M-H]-	Magnolol	0.825082	0.89417	0.650447	265.145	108.78	2.30716		C10651	Benzenoids	Benzene and substituted derivatives	Biphenyls and derivatives	111.316	10	10	78558.9	66845.8	211782	75516.8	212392	107577	130684	110047	51475.4	195680	172184	173254	85663.6	263935	203585	129350	144735	113804	92185.8	249364	107435	119038	82710.4	97367.1	145330	182466	84401.1	241145	71090.9	123182	99014.4	237114	157535
M323T397	[M-H-H2O]-	Maltose	1.12602	1.83833	0.211519	323.098	396.828	4.30454	HMDB0000163	C00208	Lipids and lipid-like molecules	Fatty Acyls	Fatty acyl glycosides	418.188	7	8	27051.5	7036.74	34979.6	193014	10758.4	74684.2	20274.5	90953.6	21848.7	25722.7	11178	51901	8104.52	33111.2	33363.3	24344.1	25754.5	95794.2	12276	129282	29602.2	7326.24	55296.6	50754.9	23707.3	7315.73	15928.6	107802	20663.3	53311.6	23202.6	12585.6	33900.4
M503T452	[M-H-C6H10O5]-	Maltotetraose	2.43002	1.92446	0.330054	503.162	451.819	1.36721	HMDB0001296	C02052	Organic oxygen compounds	Organooxygen compounds	Carbohydrates and carbohydrate conjugates	475.011	10	9	98730.9	22327.9	33634.8	1.25972e+06	57962.3	640459	130275	205967	35905.2	169969	75659.5	115275	27804.3	254663	152143	1.52179e+06	97429.1	336906	67910.4	1.54132e+06	150852	39192.3	522913	122270	183878	34405.6	44116.9	1.07156e+06	89165.2	188250	63218.5	45928.9	203910
M539T451	[M+Cl]-	Maltotriose	0.703377	1.29454	0.55855	539.139	451.486	0.632934	HMDB0001262	C01835	Organic oxygen compounds	Organooxygen compounds	Carbohydrates and carbohydrate conjugates	468.388	8	9	9042.92	7431.07	8266.18	94479.9	13354.4	39815.8	31428.1	60388.7	8165.01	12882.8	20519.5	34253	4819.68	94502.6	24184.3	222129	42058.8	45548.8	13408.7	97086.4	32321.2	8788.26	97598.1	42992.1	39149.8	5602.02	8623.27	58781.1	28152.5	54575.4	16991.4	11219.4	21154.6
M359T38	[M-H]1-	Maresin 1	0.356282	0.777431	0.226106	359.223	38.485	3.63178			Lipids and lipid-like molecules	Fatty Acyls	Fatty acids and conjugates	39.646	9	8	66243.6	87378.3	46813.4	96588.3	63097	99375.5	93206.1	106680	231926	29805.7	124699	191953	124885	63502.7	115652	67213.1	99531.4	72466.6	130976	78299.2	106339	64599.1	129159	119424	67540	77884.6	47451	85227.9	102118	20840.8	104396	90765.2	98507.5
M357T29	[M-H]-	Matairesinol	0.736927	1.792	0.139876	357.136	28.789	1.32284	HMDB0035698	C10682	Lignans, neolignans and related compounds	Furanoid lignans	Tetrahydrofuran lignans	37.087	8	10	34465.2	50077.2	121261	41067.9	16243.8	22596.5	6414.72	26835.2	17550.6	39815.9	41978.1	4204.67	18281.7	28170	7650.83	21017.7	16297	3952.49	4383.37	33289.3	55039.8	16251.9	3426.55	24366.5	24079.3	16365	59600	4820.26	8266.55	23589.9	55004.1	21140.4	13306
M275T32	[M-H]-	Menthyl salicylate	1.98073	0.714914	0.536661	275.168	31.756	0.87381			Benzenoids	Benzene and substituted derivatives	Benzoic acids and derivatives	43.168	10	10	195205	154617	177090	163392	126609	505597	134397	301909	140637	275777	283007	179534	378354	1.86704e+06	481415	168294	219993	340868	269174	221965	168943	241326	162347	318201	293135	222601	369324	216152	189588	154904	301946	191704	244424
M309T27	[M-H]-	Mestranol	1.13642	0.978053	0.947288	309.174	26.625	0.426686	HMDB0015446	C07618	Lipids and lipid-like molecules	Steroids and steroid derivatives	Estrane steroids	28.741	10	10	216497	196318	172442	188790	195216	620972	169019	290234	197098	294530	268959	153585	381052	1.05279e+06	224964	236366	278662	469136	198733	215039	225426	229257	217540	373829	361032	265795	409060	252820	207213	228885	295165	170654	307128
M191T105	[M-H-C7H5NO]-	Metamizole	0.519437	1.1678	0.607037	191.073	104.774	5.51414			Organoheterocyclic compounds	Azoles	Pyrazoles	107.975	10	8	955.724	19683.8	9075.34	24902.1	34141.9	36536.2	33362.3	42081.6	7141	45401	51647.3	32560.5	14384.5	56553	53614.2	54439.3	60177.2	38846.5	26177	43851.3	37653.8	56693.4	120612	48964.9	23560.9	15093.8	6348.23	28760.3	25571.2	28385.9	23979.2	13127	71239
M336T47	[M-H]-	Met-Gly-Met	0.10362	0.880018	0.507564	336.125	47.1815	0.723106			Organic acids and derivatives	Carboxylic acids and derivatives	Amino acids, peptides, and analogues	68.482	7	6	18762.9	14521.9	14251.6	19119.7	16197.8	22335.4	12727.3	10554	12192.4	21754.7	19236	26696.5	11461	9408.42	7824.3	16283.5	18666.4	9610.92	21287	9483.81	11219.2	16201.5	10939.3	19374	16146.8	19526.2	13032.9	17514	6714.9	25046	22800.9	31174.2	7666.67
M325T222	[M-H-C5H7O3N]-	Methopterine	1.20503	0.561148	0.186888	325.108	221.633	0.442692			Organoheterocyclic compounds	Pteridines and derivatives	Pterins and derivatives	227.303	10	10	376706	33584.5	47201.1	37505.6	77876	35101.6	63778	20689.8	7218.7	64801.5	49473.4	85022.7	8448.3	85473.3	187642	16610.7	20643.1	36782.2	26978.5	163865	16627.1	26154.6	81790.5	8569.48	126580	8981.38	6148.66	25084.5	8937.38	26466.3	33282.5	142665	21075.4
M419T226	[M-H]-	Methyl 10-acetyloxy-4,5,9-trihydroxy-1,4a-dimethyl-7-propan-2-yl-2,3,4,9,10,10a-hexahydrophenanthrene-1-carboxylate	0.107585	0.933585	0.651417	419.21	226.012	4.61566			Lipids and lipid-like molecules	Prenol lipids	Diterpenoids	228.349	4	10	4435.15	8694.56	5365.4	6512.95	4496.64	6263.82	2973.22	6966.36	7645.67	7688.94	6178.56	15295.3	9642.14	3247.2	11624.1	3605.04	4337.14	5003.29	7300.18	8011.8	5425.61	5486.35	7170.27	4986.45	8018.73	6894.4	5660.52	5386.46	8369.18	7870.28	15023.2	6266.9	4837.28
M307T35_1	[M-H]-	Methyl 2-[(4ar,5r,6r,7s,8ar)-8a-ethenyl-5,7-dihydroxy-4-methylidene-3-oxo-1,4a,5,6,7,8-hexahydroisochromen-6-yl]prop-2-enoate	0.748951	1.21682	0.401574	307.122	34.9115	2.23421			Lipids and lipid-like molecules	Prenol lipids	Terpene lactones	56.97	8	10	28706.6	104590	271718	324804	171113	161448	96856.7	220576	32277.4	167811	118434	140065	271654	353593	48805.8	110465	197360	368465	158638	358184	336265	238938	67500.6	139908	369769	208995	104360	187927	160619	299099	82176.4	263916	107255
M521T364	[M-H]-	Methyl 3-[3,4-dihydroxy-5-(3-methylbut-2-enyl)phenyl]-2-[[4-hydroxy-3-(3-methylbut-2-enyl)phenyl]methyl]-4-methoxy-5-oxofuran-2-carboxylate	0.159391	1.1307	0.655467	521.221	364.08	0.737407			Benzenoids	Phenols	Benzenediols	367.951	10	10	3290.01	23810.4	41968.1	13932.5	26344.8	36203.1	11576.7	16692.8	21581.6	21128.5	11584.3	49536.2	17985.3	17334.7	8958.89	26165.9	5302.55	6092.59	6315.91	5589.27	16125	37348.2	11726	20169.2	45547.4	12577.2	5954.05	13407.2	13391.5	26290.9	8832.95	55743.1	11249.1
M315T102	[M+HCO2]-	Methyl hexadecanoate	2.45594	1.06002	0.877659	315.254	101.782	0.261886	HMDB0061859	C16995	Lipids and lipid-like molecules	Fatty Acyls	Fatty acid esters	107.654	10	10	335534	613767	1.379e+06	646881	2.2583e+06	682900	969643	752884	1.60134e+06	3.23465e+06	1.37049e+06	1.8944e+06	1.46081e+06	1.66481e+06	2.27758e+06	645014	671230	371688	863049	1.99052e+06	525191	807308	1.29998e+06	638784	172963	1.44239e+06	949401	624921	531149	487556	1.41051e+06	917660	769719
M117T386_2	[M-H]-	Methylmalonic acid	1.49773	1.35471	0.479259	117.019	385.845	0.228583	HMDB0000202	C02170	Organic acids and derivatives	Carboxylic acids and derivatives	Dicarboxylic acids and derivatives	388.311	10	10	242100	37444.8	161021	754129	95820.1	79449.5	256391	586734	36776	141846	179474	270784	16818.3	207743	121038	129728	148581	254014	75784.3	212481	397277	140040	62830.1	134136	172509	42713.6	73629.7	554134	82274.2	503071	20244.3	398216	66384.2
M473T291	[M-H]-	Methylprednisolone succinate	0.0780829	0.905668	0.508056	473.221	290.507	2.72779			Lipids and lipid-like molecules	Steroids and steroid derivatives	Pregnane steroids	302.262	7	8	1644.58	3086.07	3830.34	3551.2	4286.84	7986.3	3755.92	4728.55	5040.14	3413.64	2866.46	5347.99	3930.14	5947.32	4362.91	2338.48	5657.69	6552.1	3830.57	8899.97	5083.81	2701.98	9142.46	4297.87	5335.31	4033.52	3266.08	3093.09	4180.15	3850.74	4936.7	3435.66	2422.48
M147T235_2	[M-H]-	Mevalonic acid	1.16054	1.2441	0.793266	147.066	234.995	0.832044	HMDB0000227	C00418	Lipids and lipid-like molecules	Fatty Acyls	Fatty acids and conjugates	238.405	9	8	1.36465e+06	29772.3	962560	53318.5	49682.7	25474.6	57909.8	38797.4	434784	45432.9	40376.5	18721.3	9596.37	24518.7	48545.5	27266.2	30022.2	30095.7	35716.4	40215.8	44652.3	25249.4	41427.7	34724.4	26439	8075.12	1.35287e+06	51273.6	24251.2	36738.5	18455.4	89917.3	26347.9
M609T279	[2M-H]-	M-hydroxybenzoylecgonine	0.486988	0.597022	0.211205	609.223	279.31	1.45987			Benzenoids	Benzene and substituted derivatives	Benzoic acids and derivatives	280.868	8	9	1710.42	17848.1	2686.08	8294.92	6950.21	3568.02	15645.7	2610.99	16923	20081.1	11067.7	38199.8	31790.8	1896.02	3193.81	9316.07	2049.08	2175.44	27027	2808.43	12174.1	23443.5	2140.18	2185.94	2755.95	14539.4	1856.38	5832.68	4188.91	25485.2	35138.8	21020.9	1859.73
M443T39	[M-H]-	Mitoxantrone	0.158259	0.855371	0.59559	443.218	39.255	2.52061	HMDB0015335	C11195	Benzenoids	Anthracenes	Anthraquinones	40.36	7	5	8633.43	115798	21487.6	23535.5	48272.1	55919.2	93236.4	42613.8	39792.4	52776.8	58845.8	80826.2	39843.5	45608.8	32396.6	39892.2	35947.2	32219.3	73971.2	50690.3	78680.3	18387.6	32595.2	24921	15473.5	60249.6	22217.8	65418	67499.9	38630.9	11362.6	78036.2	67961.6
M397T29	[M-H]-	Mitragynine	0.450163	1.01134	0.975009	397.205	29.498	6.88058	HMDB0041933	C09226				36.94	10	7	68399.3	79885.5	58425.1	45314.9	16137.6	204018	6025.05	53803	47492.7	50534.9	41520.7	128874	108931	253315	61492.5	61980.6	58287.4	20850.4	82803.9	64217.8	88214.8	34601.6	19930.3	68021.7	144590	51261.5	12619.1	46028.1	51161.9	56389.1	66546.9	31829.8	25219.6
M161T69	[M-H-H2O]-	Myo-inositol	1.71327	0.760166	0.211758	161.044	69.231	1.46587	HMDB0000211	C00137	Organic oxygen compounds	Organooxygen compounds	Alcohols and polyols	72.827	10	10	134239	180451	213904	290793	133150	299903	219652	247268	478839	208060	468987	116292	300501	570442	645184	149056	300656	194776	208457	452662	242755	236691	263261	201829	207132	194777	96627.7	223006	185264	204087	238063	230600	217407
M227T50	[M-H]-	Myristic acid	2.03625	0.877482	0.469147	227.202	50.482	0.457494	HMDB0000806	C06424	Lipids and lipid-like molecules	Fatty Acyls	Fatty acids and conjugates	51.385	10	10	1.55734e+06	1.62843e+06	1.68736e+06	1.37482e+06	1.82671e+06	1.41945e+06	1.72224e+06	1.61802e+06	4.43186e+06	1.75184e+06	1.62211e+06	1.52178e+06	1.90622e+06	2.16088e+06	2.62834e+06	1.55199e+06	1.56273e+06	1.2589e+06	1.37327e+06	1.54269e+06	1.36917e+06	1.27968e+06	1.52001e+06	1.5663e+06	1.1933e+06	2.27352e+06	1.69512e+06	1.02319e+06	1.45827e+06	1.16827e+06	1.70048e+06	1.27783e+06	1.35329e+06
M284T31	[M-H]-	N-(2,4-dinitrophenyl)-dl-threonine	0.384315	0.932975	0.638039	284.06	31.327	0.872358			Benzenoids	Benzene and substituted derivatives	Aniline and substituted anilines	34.909	8	8	82916.4	89824.1	144875	81669.3	112872	101157	68494.2	97223.2	192325	69292.2	84289.9	82917.7	119161	97644.3	47881.8	71898.7	89968.3	229503	82903.2	81495.2	69658.5	105769	39507.1	76495.2	132153	83782.8	107753	62674.4	79199.1	80416.5	108013	135333	67989.5
M251T125	[M-H]-	N-2-hydroxyethylpiperazine-n-3-propanesulfonic acid	0.3642	0.934932	0.747623	251.129	124.927	1.18745			Organoheterocyclic compounds	Diazinanes	Piperazines	137.41	9	9	49227.8	93711.1	25340.3	144552	34552.9	112704	178857	169444	118461	133842	198811	170085	232752	125048	161408	160249	156724	173368	131008	137538	215545	124082	134692	166169	102766	162509	29081	122387	167661	219850	215957	87615.1	145398
M440T249	[M-H]-	N-(2-phosphate-1r-methylethyl)-5z,8z,11z,14z-eicosatetraenamide	0.240115	0.77247	0.47168	440.255	248.68	2.10637			Organic acids and derivatives	Organic phosphoric acids and derivatives	Phosphate esters	250.489	10	8	3753.83	3707.83	3935.26	13011	4002.29	19161	10435.6	8797.67	3765.54	18646.9	39994	20541.2	2616.34	6167.04	6456.29	12477.2	10859.7	7806.25	29098.8	8290.66	21439.8	5966.74	8943.6	16084	5730.78	4584.7	3001.77	31942.8	13154.9	50457.7	8969.47	20498	7037.85
M371T97	[M-H]-	Nabilone	0.179415	0.780489	0.335541	371.28	96.64	5.41649	HMDB0014629		Organoheterocyclic compounds	Naphthopyrans	Naphthopyranones	102.758	4	5	15817.9	7379.84	24125.2	9468.77	21337.9	9801.64	17782.7	10980.3	34718.1	29103.7	17522.9	6251.23	10119.8	19626.6	17754.9	13860.2	16799.8	15261.1	11284.8	6509.9	4029	19028.1	23522.1	8856.09	9443.65	14422.6	28449.7	8902.71	4024.36	7813.14	19797.1	8596.66	8137.22
M300T78	[M-H]-	N-acetyl-d-galactosamine 4-sulfate	0.466458	0.961609	0.831386	300.04	77.62	2.19813			Organic oxygen compounds	Organooxygen compounds	Carbohydrates and carbohydrate conjugates	88.129	10	10	358212	81956.8	175449	110926	129949	96160.5	133107	145690	45030.2	119101	160065	120037	159167	104837	307939	324758	153204	124521	101880	117770	143812	112073	85491.6	137695	76397	146076	86414.2	114555	142990	115804	137097	91838.2	104747
M300T34_2	[M-H]-	N-acetyl-d-glucosamine 6-phosphate	0.943241	0.566408	0.231583	300.055	33.705	1.67099	HMDB0001062	C00357	Organic oxygen compounds	Organooxygen compounds	Carbohydrates and carbohydrate conjugates	36.799	9	9	64911.9	75679.7	82638.1	74243.4	109915	62497.2	53567.3	63216.3	574252	66397.8	38429.4	53206.3	26767.2	97355.9	44359.5	68743.6	72940.2	84936.6	69197.7	50912.7	52245.2	62412.1	30463.3	42134.1	107074	86668.7	25330.4	57164.8	83465.5	64677.5	100943	117105	20937.1
M187T313	[M-H]-	N-acetylglutamine	2.42112	1.93543	0.413472	187.072	312.798	7.59701	HMDB0006029					318.844	10	10	241536	125423	2.31419e+06	273856	160815	69443.9	100069	241121	407523	57945.6	63406.2	87466.9	51608.7	86589.3	244619	114778	62358.6	91610.8	30773.5	164556	78603	93385.3	155479	43624.2	71085.4	40884.3	1.23715e+06	125556	70808.9	83098.5	28800.7	135067	106616
M196T317	[M-H]-	N-acetylhistidine	0.180266	0.957029	0.899918	196.073	317.36	0.608861	HMDB0014748	C02997	Organic acids and derivatives	Carboxylic acids and derivatives	Amino acids, peptides, and analogues	323.534	9	10	19259.3	76791.1	158399	46198.4	101269	17226.8	51981.1	34842.9	20970.9	48052.8	34747.4	92851.8	66022	38625.4	163430	19124.7	16113.3	16534.4	24513.5	51257.6	20945.7	18496.6	54042.7	10947.9	19209.8	13563.5	40586.3	23257	15760.3	33239.7	37859.1	48751.4	35578
M130T307	[M-H]-	N-Acetyl-L-alanine	0.159375	1.20615	0.75558	130.051	306.906	1.60126	HMDB0000766		Organic acids and derivatives	Carboxylic acids and derivatives	Amino acids, peptides, and analogues	321.525	10	7	12557.4	5480.6	97570.6	13576	10654.9	10306.8	8457.4	11062.1	5401.71	60912.5	7152.18	7579.38	14429	11292.1	58872.2	6060.14	7575.83	11841.7	4491.99	15381.8	7262.39	6741.82	9710.15	4328.79	13813.8	5470.06	11665.9	10081.2	5577.44	7190.09	6331.67	78348.4	6604.36
M174T391	[M-H]-	N-acetyl-l-aspartic acid	1.09927	1.45379	0.482601	174.041	390.857	3.59135	HMDB0000812	C01042	Organic acids and derivatives	Carboxylic acids and derivatives	Amino acids, peptides, and analogues	393.411	10	10	173620	40986.2	503779	134024	175155	16893.1	31039.6	67741.4	148096	40839.4	50464.7	71881.8	12616.7	88902.6	99118.1	15427	15776.4	25780.2	18777.9	103117	33192.9	20281	15056.1	9066.08	46818.6	11047.4	125827	68198.3	31986	44889.5	11985.4	149967	15813.8
M188T385	[M-H]-	N-acetyl-l-glutamate	1.43216	1.08888	0.866457	188.056	384.593	1.99907	HMDB0001138	C00624	Organic acids and derivatives	Carboxylic acids and derivatives	Amino acids, peptides, and analogues	386.95	10	10	554800	267737	835001	94634.3	490828	33768.6	60910.9	75527.7	560164	53383.7	105833	127871	49142.8	216344	219127	30553.8	41031.4	47004.9	24768.6	173383	46399.2	31354.9	44416.8	17587.3	114820	33989.7	496315	40573.8	50477.9	81087.5	29856.6	116419	48968
M190T201	[M-H]-	N-acetyl-l-methionine	1.38657	1.60516	0.342291	190.054	200.71	5.98541	HMDB0011745	C02712	Organic acids and derivatives	Carboxylic acids and derivatives	Amino acids, peptides, and analogues	206.487	10	9	36006.6	71751.7	694150	128487	126262	97691.5	63257.3	101448	95031.6	54247.6	122190	64193	26567.7	129941	123340	90190.1	62936.6	67241.4	66206.8	98737.7	98881.6	66759.2	78052.3	37203.6	122289	19460.4	124714	133763	788.404	97127.3	35853.7	121965	80531
M206T179	[M-H]-	N-acetyl-l-phenylalanine	2.32258	1.70775	0.439275	206.082	179.405	5.40494	HMDB0000512	C03519	Organic acids and derivatives	Carboxylic acids and derivatives	Amino acids, peptides, and analogues	184.299	10	10	47694.2	79601.4	1.46018e+06	124551	367160	117816	80628.7	171112	189879	74308.4	73457	77414.1	13797.5	238503	110776	69556.7	45766.5	137333	112141	373730	47177	104261	99504	19678.5	198454	17834.1	364442	102192	16492.1	71595.3	22133.1	158786	45409
M292T309	[M-H]-	N-acetylmuramic acid	0.236896	1.0947	0.786714	292.104	309.351	3.10864	HMDB0060493	C02713	Organic oxygen compounds	Organooxygen compounds	Carbohydrates and carbohydrate conjugates	321.388	10	10	50010.1	64859.6	17906.3	70677.1	159080	87728.2	52316.3	94858.3	79159.7	75558.3	62919.4	54327.3	22009.1	81027.4	132897	56550.9	48417.9	69364	26071.6	111937	49659.2	60025.2	142691	58197.9	56493.7	34399.4	20478	26931.5	41488.9	36019	74490.4	69982.8	31472.1
M308T372	[M-H]-	N-acetylneuraminic acid	0.167668	0.994241	0.984767	308.099	372.322	1.22561	HMDB0000230	C19910	Organic oxygen compounds	Organooxygen compounds	Carbohydrates and carbohydrate conjugates	386.27	9	9	15202	19585	14301.1	51217.7	48384.9	17687.2	28195.1	28761.6	8655.42	7618.58	14096.3	16932.4	4554.54	13275.8	43815.5	16343.3	9316.61	12264.3	28609.1	38469.7	16356.5	8079.35	16294.9	6826.7	12139.6	7797.08	7240.98	49923.2	7274.78	13595.4	14994	38641.5	27150.1
M129T70	[M-H]-	N-acetylputrescine	0.370674	0.95839	0.865086	129.092	69.866	0.649233	HMDB0002064	C02714	Organic acids and derivatives	Carboximidic acids and derivatives	Carboximidic acids	71.547	10	10	179419	55245.9	113995	81006.2	57266.2	60882.6	57862.1	94152	73008.4	60556.1	89938.4	65954.2	72162	89965.7	82082.3	67544.8	62816.9	72147	65397.2	68753.1	55192.1	48786.1	39004.9	50145.7	45662.6	62019.4	215459	56300	66534.4	47588.6	90419	60732.2	79941.2
M505T49	[2M-H]-	N-acetyl-s-benzyl-l-cysteine	0.349403	0.668688	0.186708	505.127	49.169	1.38505			Organic acids and derivatives	Carboxylic acids and derivatives	Amino acids, peptides, and analogues	66.618	9	7	17777.4	13183.3	10792.1	23351.7	10474.2	21246.2	48336.5	12193.7	15666	56392.7	9514.81	21939.5	13642.7	13574.9	42535	32799.2	15476.6	20470.7	23371.7	8994.9	284423	36741.2	8483.23	4231.06	13263.3	34282.5	115799	19664.8	14764.1	12146.8	18345.9	54725.8	17917.4
M434T160	[M-H]-	N-acetyl-s-geranylgeranyl-l-cysteine	0.208704	1.03069	0.846366	434.292	160.35	7.54525			Lipids and lipid-like molecules	Prenol lipids	Diterpenoids	167.973	6	7	2081.45	15613.9	11837.8	9171.27	5597.59	8522.41	12249.7	12236.5	13490.5	15879.6	22246.4	7203.74	20862.7	8466.21	11535.1	10620.2	11285	8460.6	12595.7	7564.16	26075.4	12357.6	2478.12	20792.8	10213.5	16046.8	8580.84	7530.52	13253.1	13818.9	22186.5	13803.4	8178.77
M245T193	[M-H]-	N-acetyltryptophan	0.324628	0.654032	0.0895741	245.093	192.989	0.682709			Organic acids and derivatives	Carboxylic acids and derivatives	Amino acids, peptides, and analogues	209.498	10	8	9328.66	16615.5	9985.14	23484.8	12676	12044.3	12126.4	26231	29714.7	20897.8	14654.2	14308.6	6493.82	21305.6	18384.2	6133.11	6242.93	20773.6	16424	16986.4	12846.3	16471.6	8460.99	5487.56	22547.7	2948.11	22517.1	17481.9	5853.89	17365.7	4724.72	38698.4	8447.41
M413T47	[M-H]-	Naltrindole	0.0591794	0.875486	0.54298	413.202	46.556	4.17126		C18128				59.164	10	7	35797	46254.5	21944.6	40067.1	29173.6	25209.6	97633.4	48106.5	30382.2	45762	133601	51557.6	65122.6	35422.2	65040.2	29220.2	49227.4	89669.3	62380	59303.1	80008.7	36843.2	8054.37	46264.6	22433.6	70548.1	18210.1	33734.8	59031.7	159626	48221.2	36764.4	48644.1
M388T221	[M-H]-	N-arachidonoyl-.gamma.-aminobutyric acid	0.135934	1.17036	0.576605	388.297	220.782	4.75598			Organic acids and derivatives	Carboxylic acids and derivatives	Amino acids, peptides, and analogues	223.124	10	7	1695.82	2012.99	10166.5	3121.5	2868.33	2587.67	2373.54	3052.39	4546.65	3142.85	4153.62	3957.09	3996.53	2554.39	3159.24	1897.54	3376.98	2790.59	3866.62	1446.39	1980.47	1004.3	2282.2	1942.02	1075.36	1892.97	2409.44	1191.62	1942.86	1802.94	5457.08	1271.82	2529.04
M271T84	[M-H]-	Naringenin	0.373012	1.00483	0.972495	271.049	84.2335	1.34346	HMDB0128074	C00509	Phenylpropanoids and polyketides	Flavonoids	Flavans	107.591	9	10	69897.3	85294	121607	72592.8	78462.7	84615.4	79770.2	122901	27600.7	97320.1	100236	71392.8	88576.8	111181	108041	81665	103238	105408	61501.7	123081	113911	71068.1	60297.4	107147	179432	60672.6	66503.6	72608.6	79707.5	86521.5	139618	96248.3	61015.8
M439T27_2	[M-H-C7H15NO7]-	Natamycin	0.769519	1.09855	0.754114	439.215	27.196	2.04775		C08073	Organic oxygen compounds	Organooxygen compounds	Carbohydrates and carbohydrate conjugates	37.556	9	10	140428	284903	60297.7	52440.4	41505.8	167506	157849	316551	181851	110790	203579	89900.4	126690	110174	95203	276841	82506.3	38796.1	119396	38988.5	90460.2	47469.2	72387.1	197844	19154	223410	27987.9	94830.4	115632	161678	239785	78120.3	64961.7
M384T36_3	[M-H]-	NCGC00169011-01	0.778777	1.65852	0.415544	384.221	36.08	0.645546			Organoheterocyclic compounds	Isoindoles and derivatives	Isoindolines	49.123	7	7	100879	24576.3	207639	30657.5	28680.4	5324.15	20935.9	9525.91	25333.9	12762	8064.45	35622.8	10774.4	9059.41	7467.77	13463.8	29203.2	35028.9	29895.3	8831.15	34753.7	26426.1	7037.05	12481.1	9925.4	15785.3	113567	33686.6	10210.3	14711.2	23730.2	49266.9	26231.5
M249T103	[M-H]-	NCGC00169093-01	0.245523	1.18532	0.554367	249.15	103.488	2.05861			Lipids and lipid-like molecules	Prenol lipids	Sesquiterpenoids	116.805	9	7	25721.5	26219.1	13384.2	33835.8	12662.8	13313	37841.9	60861.4	1669.83	42897.5	58459.3	36042.3	21270.4	46675	64943.6	24684.1	19374	13652.4	28655.8	47865.1	51899.2	24414.8	33736.9	14270.5	22996.4	18674.8	8435.49	12566.4	10837.3	10969.5	11906.8	19381.4	35814.1
M446T105	[M-H]-	N-docosanoyltaurine	0.257377	0.693427	0.370888	446.329	104.799	4.27746			Lipids and lipid-like molecules	Fatty Acyls	Fatty amides	114.55	8	6	20985	20818	17955.3	16773.1	109701	14842.7	16780.1	11436.7	16272.9	29091.4	4032.65	61082.2	21830.9	20819.4	26905	18064.4	13923.7	5969.39	32159.1	39967.9	20251.1	13148.1	16328.8	14268	15224.4	18580.1	7056.1	11352.4	6936.7	7158.35	21983.5	7674.56	15939.8
M365T45	[M-H]-	Nervonic acid	0.915704	1.53129	0.337453	365.343	45.1765	5.84543	HMDB0002368	C08323	Lipids and lipid-like molecules	Fatty Acyls	Fatty acids and conjugates	47.545	8	9	117519	69380.4	49308.9	9980.37	21612	15223.4	74081.6	12092.2	50825.5	35270.2	4527.18	21115.9	13557.6	4451	19313.5	9017.04	10434.5	6423.64	12807.9	9813.67	17304.6	13778.8	4922.67	17687.7	8113.84	77180.8	41631.5	14595.8	40663	10863.1	9711.9	5392.38	10805.6
M160T397	[M-H]-	N-formylaspartate	0.276512	1.29517	0.638851	160.025	396.984	4.54883	HMDB0060495	C01044	Organic acids and derivatives	Carboxylic acids and derivatives	Amino acids, peptides, and analogues	401.36	7	7	4703.39	1973.66	19414.6	4196.31	8746.71	1165.96	3363.97	2158.8	7860.23	2416.88	567.154	533.666	965.765	2040.13	1986.4	2423.12	510.053	1959.23	854.158	3110.1	760.433	2079.99	2715.39	2627.18	3928.66	1995.98	5183.02	1567.65	2862.22	1041.32	3060.73	3802.79	2351.17
M176T197	[M-H]-	N-formylmethionine	0.417256	1.06578	0.754531	176.038	197.001	0.248055	HMDB0001015	C03145	Organic acids and derivatives	Carboxylic acids and derivatives	Amino acids, peptides, and analogues	202.918	9	10	51284.7	49916.1	106857	68161	77767.5	48702	40466.1	46758.3	27749.6	38629.4	51962	44062.3	24591.7	49778	68577.6	34851.4	31924.1	48677	33112	46765.2	47559.9	37914.3	40012	25613.9	54778.2	8806.09	64075.1	68487.5	16767.6	53577.1	32009	64691.6	46040.5
M290T342	[M-H]-	N-fructosyl pyroglutamate	0.813208	1.20701	0.589653	290.089	342.266	0.245078			Organic acids and derivatives	Carboxylic acids and derivatives	Amino acids, peptides, and analogues	347.992	10	10	106663	196420	273438	174761	272630	31035.8	27763	84844.1	56151.9	78566.9	25199.5	106323	49328.4	106018	35351	69396.9	46287.5	113416	100905	209757	46312.6	193430	9247.4	60614.1	321304	51917.9	200077	82427.2	31304.1	250242	11535.8	280319	70274.5
M478T161	[M-H]-	Nicardipine	0.34593	0.605274	0.0234125	478.212	161.242	2.33424	HMDB0014760	C07264	Organoheterocyclic compounds	Pyridines and derivatives	Hydropyridines	164.929	6	5	6349.74	3325.59	5437.23	8568.02	2480.12	6599.54	15769.8	9979.18	15667.9	12818.9	4934.28	44563.7	14064.8	8569.92	9199.57	8674.37	8142.2	7807.89	9008.28	7581.03	11618.2	5322.44	10373.4	9619.58	7786.97	9386.15	5734.21	3243.96	11252.1	29198	21042.3	17455.2	3507.97
M404T299	[M-H]-	Nifekalant	0.944953	0.551392	0.584928	404.192	298.57	1.4911			Benzenoids	Benzene and substituted derivatives	Phenylpropylamines	303.385	10	8	1660.51	4177.9	51405.3	10448.5	18937.9	2801.99	28483.5	4169.16	2940.16	28548.5	9454.1	10023.3	2024.54	21244.5	302456	7961.56	9096.03	4100.24	3172.53	8457.75	3823.7	3082.61	7133.65	1788.14	3416.11	1432.21	2495.95	13267	1287.3	3087.23	2933.48	3678.41	6228.09
M144T217	[M-H]-	N-isobutyrylglycine	0.681137	0.738021	0.511336	144.066	217.094	0.281393	HMDB0000730		Organic acids and derivatives	Carboxylic acids and derivatives	Amino acids, peptides, and analogues	236.465	10	10	30724.6	36271.7	268447	65853	151351	51461.8	129709	57795.8	359924	91081.2	36717.8	61575.4	11692.6	126979	400706	23840.4	26754.1	35421.8	38249.2	142715	54099.4	45093.5	110862	10388.2	40754.4	8933.88	121997	59170.5	9329.89	34520.2	11588.1	52236	42093.6
M317T199	[2M-H]-	N-isovaleroylglycine	0.286611	0.8829	0.215241	317.197	198.597	2.46961	HMDB0000678		Organic acids and derivatives	Carboxylic acids and derivatives	Amino acids, peptides, and analogues	207.064	9	9	52872.7	29365.8	27786	17289.9	21718.8	23802.3	23583.8	26952	38132.5	19983.8	29549.7	20964.9	36762.3	26132	29285.3	24121.5	27682.2	20366.4	29287.5	21004.6	36040.7	27613.7	23194.4	21007.7	34550.1	26496	32205.3	12590.7	17335.1	22094	39389.2	31190	15487.8
M266T168	[M-H]-	N-(-)-jasmonoyl glycine	0.353356	1.08526	0.804264	266.14	167.595	1.70917			Organic acids and derivatives	Carboxylic acids and derivatives	Amino acids, peptides, and analogues	173.125	6	6	13938.1	10931.2	43157.4	4826.54	23246	63775.2	31231.7	29595.4	12724.7	11346	4771.87	6251.55	20335	22083.9	70538.7	32430.7	69803	84892	33503.7	23796.7	49318.5	11422.2	24217.7	38835.3	134158	21916	8855.79	38190.6	25580.2	76161.8	43800.3	8683.98	5685.93
M399T47	[M-H]-	N,n'-dicarbobenzyloxy-l-ornithine	0.336314	0.879368	0.575652	399.148	47.215	2.08264			Benzenoids	Benzene and substituted derivatives	Benzyloxycarbonyls	67.986	10	10	81693.6	54958.3	22122.6	25426.9	42483.8	35294.6	53384.2	74233	20554.4	141441	70491	197544	91256	18572.7	52427.4	101135	18737	35262.8	93141.2	38618.7	89389.2	48523.5	21691.6	55303.8	32997.1	104085	25874.7	39896	153923	87870.9	133904	99137	40517.4
M310T629	[M-H]-	N,n-dimethylguanosine	0.263648	1.14462	0.622334	310.119	629.317	2.40058	HMDB0004824					644.402	9	9	32882.5	9724.97	23387.1	8176	10193.2	9828.12	6095.45	15437.5	8654.52	9779.09	10526.6	13185.2	22127.5	8130.65	11268	14500.5	10934.2	8387.91	1666.31	10997.3	12857.8	9538.1	3794.67	5291.42	8338.32	6587.48	4931.27	8075.23	4135.42	8947.49	6296.48	1375.04	4561.85
M599T248	[M-H]-	Nocardamine	0.203155	0.985395	0.942663	599.321	248.486	2.11183						250	10	10	30758.8	28146.4	34370.1	28443.1	37939.3	49235.2	37493.3	18399.7	52871.7	26307.1	21637	22538.2	12128.7	27877.6	19452	24198.6	16352	17831.7	20802.8	26164.3	21423.7	31663	14390.3	18717.7	22909.8	19347.1	29123.7	25350.2	19467.1	19159.1	12697.3	20387.8	16462.5
M209T61	[M-H]-	N-octyl sulfate	0.413029	0.981911	0.879349	209.085	61.423	0.288526			Organic acids and derivatives	Organic sulfuric acids and derivatives	Sulfuric acid esters	80.833	10	10	276838	323632	475363	263517	409170	362429	225723	292532	123530	358479	303725	214108	259934	308496	315302	265032	304091	334402	386670	331397	335520	346837	184970	248134	368585	242111	281656	314100	215111	334078	341360	411852	194618
M338T115	[M-H-CH2O]-	N-oleoyl-l-serine	0.606881	1.15012	0.519936	338.27	115.243	1.83837			Organic acids and derivatives	Carboxylic acids and derivatives	Amino acids, peptides, and analogues	123.487	10	10	42658.2	45159.9	67235.9	39279.9	77267.7	32574.5	30871.9	20619.6	25832.2	47546.5	11855.5	23225.7	13986	18177.1	36773.2	32048.2	28958.5	30294.3	24639.1	37992.2	38757.8	24677.7	10023.7	18764.1	38860.8	45296.4	51294.5	31624.5	19747.7	19521.8	35507.6	20754	19068
M259T163	[M-H-C2H3O2]-	Norfloxacin	1.0019	0.860082	0.568417	259.098	163.472	2.98169	HMDB0015192	C06687	Organoheterocyclic compounds	Quinolines and derivatives	Quinoline carboxylic acids	171.675	10	10	97177.7	28012.2	53981.6	189727	45890.7	112999	135742	133026	17674.2	141792	173192	85680.8	108431	122118	190201	153361	201534	130281	120303	164146	124208	87262.9	141523	187776	94836.4	93569.9	76275.3	146310	137584	104633	138086	199311	125874
M362T37	[M-H]-	N-palmitoyltaurine	0.771204	0.773196	0.179644	362.238	36.906	0.0440917			Lipids and lipid-like molecules	Fatty Acyls	Fatty amides	47.158	10	9	1.26481e+06	57460.3	102727	92793.4	39872	119929	121764	98161.4	80858	126470	107737	290936	70081.1	96900.7	136487	80359.7	105384	69014.2	74995.5	79095.1	125625	80379.8	75072.1	70041.1	56640.9	50085.4	95119.2	107253	75506.5	103690	184912	228742	82496.2
M160T223	[M-H-C10H7O2N]-	N-phthalyl-l-tryptophan	0.457516	0.829321	0.470793	160.04	223.073	0.0281883			Organoheterocyclic compounds	Indoles and derivatives	Indolyl carboxylic acids and derivatives	230.616	9	5	29068.4	15772.4	20521.5	62889.2	24533.9	40556.7	33975.5	27315.3	23051.6	36321.6	70851.6	24170.5	47183.5	31847.3	104904	29504.7	39164.8	37219.2	36841.8	38970.9	32276.7	31474.7	44530	34892.8	45691.8	29874.3	16962.1	28647.4	30372.1	22459.8	49052.5	33010.9	27462.1
M228T64	[M-H]-	N-tris(hydroxymethyl)methyl-2-aminoethanesulfonic acid	0.430997	0.746573	0.510885	228.034	63.574	1.56986		C05353	Organic acids and derivatives	Organic sulfonic acids and derivatives	Organosulfonic acids and derivatives	84.12	7	7	242330	30357.9	178135	32538.7	74828.6	18023.4	87705.4	36306.2	13336.3	59286.4	23892.7	52805.2	37887.7	40157.7	251680	24346.6	18766.2	32226.9	33780.8	82751.8	35284.1	28582.9	51144.9	4241.79	22224.5	30496.8	63420.4	31356.3	27945.8	32560.2	17988.9	40512.4	25593.9
M194T372	[M-H]-	O-acetylsalicylhydroxamic acid	0.0504117	0.852468	0.631892	194.044	372.417	4.17027			Benzenoids	Benzene and substituted derivatives	Benzoic acids and derivatives	388.108	4	7	12679.9	1684.72	10154.9	2479.49	4121.37	1707.38	2016.3	1740.91	4440.16	2991.46	2283.43	1655.57	1429.82	2771.96	4069.25	1934.43	1442.39	1363.42	1370.19	2812.51	1384.88	1947.17	2112.92	1331.09	3418.61	1610.08	4496.04	2377.06	1343.76	2141.64	1285.58	2798.82	1602.4
M146T354	[M-H]-	O-acetylserine	0.0635246	1.15561	0.679714	146.057	353.539	1.9607	HMDB0003011	C00979	Organic acids and derivatives	Carboxylic acids and derivatives	Amino acids, peptides, and analogues	359.052	9	10	4138.76	2989.62	2672.49	2165.28	2407.79	3731.54	1545.94	3851.01	6343.56	3399.07	2222.55	2274.51	1270.46	6181.98	2102.99	1744.42	2156.42	2415.24	3820.52	5669.03	2726.76	2668.48	1393.57	1036.28	2840.55	1653.82	5087.6	3104.38	1999.18	2465.44	862.266	4272.98	1283.44
M476T51	[M-H]-	Octanediamide, n1-hydroxy-n8-[4-[4-[(1-oxo-5-hexyn-1-yl)amino]benzoyl]phenyl]-	0.424883	0.851933	0.371441	476.235	51.216	3.29353			Benzenoids	Benzene and substituted derivatives	Benzophenones	65.054	6	8	29568.7	42404.2	30239.5	56001.1	28688.9	46337.5	58047.1	43968.7	28327.2	72970.5	52512.5	103316	32919.9	34813.8	56440.7	50154.6	47458.7	25247.9	87886.6	29903.4	91349.9	60854.5	21195.5	30997.3	48953.7	21317.1	22827.4	60365.1	48791.4	31663.3	82401.9	75067.3	29086.7
M443T56	[M-H]-	O-desmethylastemizole	0.247384	0.735295	0.317978	443.219	55.8785	0.948295	HMDB0061013					57.43	10	8	7559.97	48595.4	25467.5	32457	26649.6	42521.7	127712	19596.2	30417.7	108707	78259.2	85425.2	17775.7	43090.9	26574.3	53535	26061.1	21316.5	89560.6	26243.8	90355.5	22552.3	47875.4	39336	15684.1	32743.3	30134.3	81663.4	95587.8	54034.4	68424.6	93619.6	77474.4
M360T51	[M-H]-	Ofloxacin	0.42291	0.783951	0.27326	360.149	50.8035	6.82149	HMDB0015296	C07321	Organoheterocyclic compounds	Quinolines and derivatives	Quinoline carboxylic acids	73.269	8	6	57202.8	53401.1	20835.5	38901.1	8848.98	63849.6	29003.4	32616.7	124329	82667.6	81314	106695	39011.9	53875.5	79616.8	36034.8	39917.8	17272.8	49569.4	54352.3	66861.6	38031.5	41880.3	44983.9	42441.6	79770.7	81673.5	33979.6	62329.8	41657.1	105085	78773.9	65829.2
M790T37	[M-H]-	Oligomycin a	0.63076	0.868905	0.657857	789.533	37.159	1.42943		C11311				52.438	4	8	41427.6	44293.6	31984.9	41682	53964.7	115026	51953.1	57327.9	33924.5	41491	124542	47015.6	79115.5	224113	29139.4	44155.9	88091.6	107521	63315.4	125165	46776.5	64824.1	13554.3	54677.2	401476	55553.7	23269.8	32358.9	78014.8	73512.4	94877.4	55087.7	39965.6
M257T38	[M-H]-	Ononetin	1.94998	1.2501	0.30424	257.082	38.4255	1.58033						52.373	10	10	238156	138995	377371	757910	286977	191052	448404	363841	213526	516260	536870	426704	451333	337765	226460	479027	812251	586325	465999	351417	520226	1.64203e+06	301844	794968	704584	285455	605193	590101	449801	335972	281537	272705	680436
M527T22	[M+Br]-	Orientin	0.0672912	1.4689	0.597579	527.009	21.8	2.95087		C10114	Phenylpropanoids and polyketides	Flavonoids	Flavonoid glycosides	23.386	8	3	2216.25	182.277	231.87	437.472	386.724	1049.78	3810.35	518.9	331.034	979.417	1174.27	493.02	3315.92	369.629	1095.93	526.131	917.716	678.89	2161.19	280.025	2033.65	2971.08	921.528	470.245	182.49	6671.74	291.889	584.838	3755.56	449.17	1985.59	391.483	237.979
M155T230_2	[M-H]-	Orotate	0.105158	0.996035	0.993623	155.01	230.328	3.13518	HMDB0000226	C00295	Organoheterocyclic compounds	Diazines	Pyrimidines and pyrimidine derivatives	233.796	3	8	9954.63	11866.8	70623.2	6301.49	29768.4	6199.35	21378.7	5849.04	24699.9	12837	10990.7	15629.1	3340.27	18505.1	72613.8	10594.7	5822.63	4863.11	2608.89	47283.8	5561.55	5897.82	23789.6	2035.17	6716.25	2642.38	47956.7	7086.38	3476.58	4394.66	2493.66	7092.81	8497.56
M287T309	[M-H]-	Orotidine	0.414479	0.647614	0.511524	287.052	308.955	1.44293	HMDB0000788					314.884	7	7	67151.9	6876.53	58928	9292	32515.5	2221.66	21742.2	8687.43	5294.8	15245.7	879.721	7724.47	5014.42	12082.7	127787	1975.43	7223	7291.06	5307.96	30156.4	2808.95	4825.68	26152.9	3033.85	6528.35	1864.9	8712.56	5570.22	2480.81	5919.18	1876.05	3311.07	5936.16
M297T29_2	[M-H]-	Ostruthin	1.84639	0.841725	0.652119	297.153	28.816	0.95514		C09281	Lipids and lipid-like molecules	Prenol lipids	Terpene lactones	44.006	10	10	210690	273383	272480	411174	284524	931280	341133	524155	287238	499320	528564	460561	693037	2.2775e+06	442900	368144	509257	694089	491476	298955	410873	492237	291395	635786	521776	431855	694807	546563	458639	385226	534464	362294	518969
M200T386	[M-H-H2O]-	O-succinyl-l-homoserine	0.760639	1.40994	0.614297	200.056	385.779	2.04412		C01118	Organic acids and derivatives	Carboxylic acids and derivatives	Amino acids, peptides, and analogues	388.311	10	10	404149	22599	191074	12259.5	57897.8	10268.9	14816.6	8734.23	16024.9	15085.2	9901.74	9888.56	5419.7	15813	26409.9	6593.1	9695.37	7669.29	6980.94	17978	9939.21	9424.04	12533	5073.04	12646.7	9455.22	101842	9231.16	7890.39	8340.13	6900.1	23560	8713.54
M476T308	[M-H]-	Oxymorphone 3-.beta.-d-glucuronide	0.392362	0.448348	0.00898606	476.142	307.829	4.36119			Organic oxygen compounds	Organooxygen compounds	Carbohydrates and carbohydrate conjugates	310.808	8	8	2520.2	3997.54	2084.69	3317.81	2783.94	4060.21	11077.3	2424.84	13294.4	4095.59	12435.7	4624.55	11612.4	7519.54	14183.6	989.739	4689.55	5309.38	9772.44	1197.86	5329.55	4524.25	3908.54	3398.81	4408.22	3331.86	3598.65	6245.25	4453.53	2944.84	5544.32	2212.6	6166.37
M178T65	[M-H]-	P-acetaminobenzoic acid	1.04464	1.64515	0.476333	178.052	64.618	4.81647			Benzenoids	Benzene and substituted derivatives	Benzoic acids and derivatives	68.692	8	10	238917	51683.8	591077	30728.9	32591.9	38808.8	31269.6	21913.8	32606.6	41387.2	42699	39281.8	33152.4	91580	53415.3	43452.2	104703	38414.6	42323.8	54850.4	41733.7	44727.6	29109.6	29023	83977.7	35654.2	231375	32067.6	43736.6	107724	78155.8	37736.7	33751.8
M255T50	[M-H]-	Palmitic acid	8.37694	1.0166	0.941359	255.233	49.765	0.520869	HMDB0000220	C00249	Lipids and lipid-like molecules	Fatty Acyls	Fatty acids and conjugates	50.735	10	10	2.1597e+07	1.10693e+07	2.04756e+07	7.54898e+06	1.23379e+07	9.74594e+06	1.50225e+07	6.32781e+06	1.98588e+07	1.23155e+07	5.66999e+06	6.57593e+06	8.45703e+06	6.07428e+06	1.55972e+07	6.63575e+06	5.07752e+06	3.79415e+06	5.74697e+06	4.63636e+06	8.07495e+06	7.55577e+06	8.01986e+06	9.62734e+06	5.26754e+06	1.50546e+07	1.87915e+07	7.11422e+06	1.28365e+07	5.40854e+06	6.85351e+06	6.31108e+06	9.56254e+06
M218T275	[M-H]-	Pantothenate	2.1335	0.740103	0.47985	218.104	274.675	0.4982	HMDB0000210	C00864	Organic oxygen compounds	Organooxygen compounds	Alcohols and polyols	275.95	10	10	3.28084e+06	331884	1.82713e+06	336520	1.36354e+06	227525	537231	601467	3.1352e+06	698205	771772	535417	344866	1.37403e+06	1.96345e+06	397626	360896	304353	444330	1.05115e+06	336096	665430	766974	253414	181824	160696	1.37366e+06	255286	223241	258762	440402	650211	267827
M843T149	[M+Hac-H]-	Pc(16:0e/5,6-eet)	0.480211	0.969127	0.892393	842.593	148.989	1.25142			Lipids and lipid-like molecules	Glycerophospholipids	Glycerophosphocholines	152.303	10	10	47210	24612.5	61631.6	76534.8	30782.8	45231.6	44908	36195.3	11235.5	59239.3	45148.7	44177.9	61664.5	65944.2	22725.4	35218	74622.2	101202	40815.6	35205.7	44176.9	47984.8	25546.8	60975	164512	36513.1	77779.8	69900.8	26208.7	49587.8	32512.6	45617.2	76533.2
M841T149	[M+Hac-H]-	Pc(16:0e/8-hepe)	0.641179	1.09449	0.697965	840.578	149.395	1.04012			Lipids and lipid-like molecules	Glycerophospholipids	Glycerophosphocholines	152.672	10	10	65930.3	30232.8	77762.3	94906.3	29555.8	45744.9	52776.8	39790.6	17453.9	77546.1	51288.1	42333.6	49865	79852.6	23881.7	43258.8	97712.5	135101	44395.1	44673.2	55082.7	61664	29526.8	65495.8	215658	44471	105057	81520.7	34992.7	66706.9	30828.2	47402.4	87098
M839T150	[M+Hac-H]-	Pc(16:1e/8,9-epete)	0.0390263	0.934091	0.625796	838.561	149.516	0.628515			Lipids and lipid-like molecules	Glycerophospholipids	Glycerophosphocholines	163.34	9	7	10722.4	16344	10027.8	12842.7	7069.23	11762	10753.8	11393.3	9465.05	10322.7	11798.9	11708.6	21417	15174.9	10110.4	11692	13045.6	12735.7	7672.49	10786.7	8684.71	15734.2	6791.41	9251.17	34937.1	13604.3	9575.59	15847.1	6806.53	13879.2	13931.2	10964.4	11371.6
M869T146	[M+Hac-H]-	Pc(18:1e/14,15-eet)	0.138305	0.833231	0.100391	868.608	146.149	2.73998			Lipids and lipid-like molecules	Glycerophospholipids	Glycerophosphocholines	148.813	4	6	8296.89	9470.98	8534.63	6475.58	10350.5	7251.82	11923.4	6679.25	13079.3	3422	9199.38	8280	10954.5	9295.78	8048.9	5704.65	8698.38	8294.32	6983.17	8228.47	7242.6	6834.62	5197.77	7145.54	14070.3	7810.14	7125.8	4338.78	5207.76	6834.78	9679.86	11778.6	7321.67
M845T149	[M+Hac-H]-	Pc(18:1e/9-hode)	0.364025	1.03603	0.849521	844.607	149.401	1.61391			Lipids and lipid-like molecules	Glycerophospholipids	Glycerophosphocholines	152.672	10	10	28596.9	13748.3	27363.7	31933.7	13045.4	20929.9	21202.4	17263.5	11138.6	21757.2	21901.8	21533.4	16505.5	27439.4	12354.8	16791.7	29775.2	38740.2	22312.6	19876.3	18107	23338.9	12296.3	25325.2	55511.4	20129.2	28834.4	29488.7	11233.1	20351.6	13919.7	21444.2	31704.1
M163T173	[M-H]-	P-coumaric acid	0.0596879	0.907057	0.605192	163.04	172.862	0.321435	HMDB0002035	C00811	Phenylpropanoids and polyketides	Cinnamic acids and derivatives	Hydroxycinnamic acids and derivatives	179.683	9	10	19809	21350.1	28468.6	37026.8	26657	25469.1	42347.6	23866.7	29836.5	35499.2	24804.7	28664.4	14646.3	22660.5	53824.7	17471.3	14910.4	18877.5	14535.2	20163.5	19627.4	20168.2	20212.9	15611.6	20170.7	15265.4	35005.9	18462.8	9198.3	17692.5	9307.28	32253.4	20953.7
M779T37	[M-H]-	Pe(16:0/19,20-epdpe)	0.226185	0.96596	0.782774	778.523	36.717	9.81301			Lipids and lipid-like molecules	Glycerophospholipids	Glycerophosphoethanolamines	38.072	7	6	78970.3	55765.9	87378.9	112064	87261.1	149704	106465	112859	164482	86536.1	85650	62854.4	124391	83324	68155.5	75093.2	94250.1	105983	68043.9	82611.8	93565.8	95011.5	93917.8	93054.8	76394.6	70952.3	85161	102861	99584.1	103468	82973.4	101404	94655.7
M765T48	[M-H]-	Pe(16:0e/10-hdohe)	0.620044	0.73117	0.234949	764.503	48.496	2.74798			Lipids and lipid-like molecules	Glycerophospholipids	Glycerophosphoethanolamines	55.541	7	7	44979.8	27125.3	14596.4	33325.3	24887.2	46693.2	44106.4	30487.4	21345.1	41309.6	28250.4	27788.3	123864	54390.9	50910.7	79045.7	45358.3	40485.3	52494.3	34128.8	21054.1	37245.6	20601.5	37414.4	70106.1	36848.9	23805.2	53425.5	29818.7	28601.7	48858.5	64133.4	40191.6
M741T56	[M-H]-	Pe(16:0e/12-hete)	1.22456	1.16463	0.366581	740.524	56.154	2.87978			Lipids and lipid-like molecules	Glycerophospholipids	Glycerophosphoethanolamines	70.402	10	10	191991	206545	189562	164363	137416	152538	295242	245444	106421	235125	146012	109476	121775	135473	109541	173973	149877	143946	139478	150110	250630	192891	100775	162796	273933	245210	203312	176049	171000	223887	133158	108496	165464
M739T190	[M-H]-	Pe(16:1e/15-hete)	0.205589	0.937193	0.834697	738.515	190.334	4.34205			Lipids and lipid-like molecules	Glycerophospholipids	Glycerophosphoethanolamines	195.278	9	10	5654	9472.84	24075.8	7214.67	19312.7	6524.89	6068.33	5729.41	6717.4	10194.7	4335.72	5301.67	5368.91	6277.44	2770.98	3929.94	3367.34	6144.96	4980.24	12885.2	5911.59	9541.02	2187.36	3698.96	28551.1	4728.38	21911	9072.75	4755.44	7709.36	6255.92	8594.28	4360.06
M781T213	[M-H]-	Pe(18:0/18-hepe)	0.0382301	1.00319	0.986326	780.506	212.503	1.367			Lipids and lipid-like molecules	Glycerophospholipids	Glycerophosphoethanolamines	217.267	7	5	2249.07	4863.67	5848.7	2580.36	5742.58	3510.78	4047.46	6875.96	4447.12	3678.34	9089.27	3373.84	3903.52	10642.6	6638.79	6671.22	2574.29	2476.25	3471.18	10394.6	3249.65	3019.82	4160.44	2552.95	5755.8	5895.56	2029.45	3244.79	3570.45	3743.46	4282.13	4254.9	5389.56
M783T237	[M-H]-	Pe(18:0/8-hete)	0.0777404	0.837961	0.417796	782.518	237.431	3.40671			Lipids and lipid-like molecules	Glycerophospholipids	Glycerophosphoethanolamines	240.355	5	5	5831.9	2091.98	1429.12	761.533	839.948	1178.69	3547.15	980.482	2979.87	1542.47	1068.25	1443.41	1403.49	1102.15	1609.27	887.228	1307.19	1120.5	1063.23	1180.89	1354.63	1247.51	985.691	1715.98	1189.46	2778.18	1600.2	864.733	2344.37	1254.83	1554.03	1748.58	783.499
M827T519	[M-H]-	Pentasaccharides (hex-hex-hex-hex-hex)	0.657016	1.97162	0.297353	827.27	519.019	2.52785			Organic oxygen compounds	Organooxygen compounds	Carbohydrates and carbohydrate conjugates	538.738	10	10	3525.57	1561.61	2704.09	92892.1	20064.2	21208.8	5402.45	34807.9	1466.07	8802.3	4043.35	5814.72	2079.15	4172.84	16850.4	69605.6	18151.4	38030	2066.06	84692.3	12793.9	2585.98	13512.7	6281.06	25576.1	2894.24	2068.27	42014	7157.65	23955.7	15327.5	2557.54	7882.6
M211T101_2	[M-H]-	Perseitol	0.948543	0.789509	0.639839	211.097	101.306	1.80213	HMDB0033750	C08255	Organic oxygen compounds	Organooxygen compounds	Carbohydrates and carbohydrate conjugates	103.18	9	5	101180	21205.9	39143.4	57346.3	36401.9	68209	59891.3	96216.5	29606.2	81942.8	57157.1	49791.3	26663.2	94481.3	349638	68492	61308.9	63657.3	55611.3	95369.6	49340	45278.6	135831	37112.9	32331.1	40660.6	35865.8	41336.6	44316.5	44366	86816.9	39945.9	74667.6
M809T34_3	[M-H]-	Pg(16:0/10-hdohe)	1.27254	0.983754	0.937662	809.487	33.787	1.76539			Lipids and lipid-like molecules	Glycerophospholipids	Glycerophosphoglycerols	51.79	10	10	284624	178429	257336	471282	179916	256113	364110	316170	149773	490600	386894	250264	268749	291568	225947	253342	362801	354679	404767	260599	348682	527310	223396	538537	372145	367136	281783	479736	297708	363357	412381	424903	558025
M767T193	[M-H]-	Pg 36:5	0.341777	1.07284	0.848454	767.46	192.973	3.4753			Lipids and lipid-like molecules	Glycerophospholipids	Glycerophosphoglycerols	204.167	10	9	38538.8	25731.3	42702.3	58998.2	19913.9	17700.3	24871.3	21696	2903.84	16726.9	15031	51143.7	15157.1	9786.73	8236.81	56716	12278.4	11963.3	10489	11153.9	25124.6	37498.7	9428.12	12053.4	54173.2	9920.94	126413	31035.4	9593.4	37676.1	5224.72	65268.2	27919.9
M818T38	[M-H]-	Pg 40:8	0.600289	0.79264	0.346921	817.507	37.877	0.487434			Lipids and lipid-like molecules	Glycerophospholipids	Glycerophosphoglycerols	53.683	7	6	70952.3	34932	37257.7	93401.4	63120.7	132820	84574.4	104785	9460.81	182478	129712	78090.7	133548	80860.4	102373	85618.6	91298.5	124552	237937	36184.5	167593	134760	26372.9	94594.1	96853.6	110903	48933.4	92170	109740	134740	170309	137296	131562
M842T194	[M-H]-	Pg 42:10	0.178983	1.06556	0.727612	841.501	193.527	4.58867						208.425	8	7	11446.8	9236.27	8177.96	7170.14	5368.93	4837.09	10408.9	5726.12	10889.3	7931.61	4513.31	7919.86	6198.19	3536.65	9835.82	6814.56	4613.15	5764.86	4364.49	2670.52	6395.06	2495.52	2809.52	4159.39	6992.15	6722.73	6668.37	5954.39	4918.5	4155.87	8117.18	8250.06	3894.35
M537T30	[M-H]-	Phe(benzoyl)-leu-arg	0.698151	1.03524	0.902409	537.29	30.412	0.559894			Organic acids and derivatives	Carboxylic acids and derivatives	Amino acids, peptides, and analogues	33.213	9	10	57885.6	385651	117860	101630	85344.9	116203	117552	138213	94174	129957	128663	146563	253380	85609.2	67152.6	111200	112324	90264.2	210521	67918.1	138597	53940.9	52622.9	90922.5	57795.3	103124	62718.3	102893	122809	151149	161535	117009	105239
M597T249	[M-H]-	Phe-met-arg-phe-amide	0.461663	1.10755	0.554316	597.304	249.383	1.27682			Organic acids and derivatives	Carboxylic acids and derivatives	Amino acids, peptides, and analogues	250.814	10	10	27327.3	12909	24922.3	30343.4	20990.1	33972.2	26007.2	26467.7	12977.7	30242.9	22813.6	18727.9	10029	24463.6	15948.6	26263.4	31463.9	35036.4	17488.9	27397	29418.1	24528.6	18986	29321.8	41727	14880.6	33944.7	28459	19687.5	26138.5	15614.3	19539.3	21377.2
M192T186	[M-H]-	Phenaceturic acid	5.54057	0.255069	0.404943	192.066	185.578	0.551716	HMDB0000821	C05598	Organic acids and derivatives	Carboxylic acids and derivatives	Amino acids, peptides, and analogues	200.801	10	10	11946.4	55508.8	491373	94542.8	322680	59923	553538	24788.2	23200.4	383514	77861.6	138178	9974.98	220909	9.08883e+06	66777.6	89831.9	36161.7	27673	1.43786e+06	34801.3	115922	501037	13095.1	23980.4	12162.2	18975.6	69127.6	14311.4	19623.7	6655.33	72926.1	86947.6
M93T26	[M-H]-	Phenol	4.09133	0.371347	0.314257	93.0342	26.177	7.06306	HMDB0000228	C00146	Benzenoids	Phenols	1-hydroxy-4-unsubstituted benzenoids	27.601	10	10	1.7633e+06	62385.9	799288	77634.3	716872	17195.1	846799	27721.6	10262.7	668202	252710	262240	8948.91	401445	4.72479e+06	228964	141417	29322.1	41231	1.26416e+06	67647.2	185056	574160	17209.5	35906.6	14334.2	27168.1	108846	23046.4	36217.1	5797.13	67108.8	152119
M135T133	[M-H]-	Phenylacetic acid	0.164441	0.799819	0.271277	135.045	133.434	1.67672	HMDB0000209	C07086				138.486	10	10	150907	109767	343440	85364.7	212153	170721	89875.6	147539	370074	123644	320087	113760	167219	271304	227633	138626	145633	167127	132949	377079	94674.6	124013	102987	63902.2	252359	95648	279049	124683	82801.6	123920	157937	126372	177135
M269T340	[M-H]-	Phenyl glucuronide	0.0641242	0.899979	0.410353	269.076	339.624	7.65297	HMDB0060014		Organic oxygen compounds	Organooxygen compounds	Carbohydrates and carbohydrate conjugates	360.941	6	4	1548.53	2838.45	3260	2718.32	3624.41	3091.85	3007.3	3320.2	2847.51	1806.35	2441.97	1503.7	2264.73	2519.95	3970.75	2010.34	1439.78	722.801	1642.38	2070.48	1174.05	3978.17	3982.34	2234.11	1331.1	2873.73	3198.14	2261.29	2939.07	3474.07	3769.81	3247.7	2563.01
M149T51	[M-H]-	Phenylglyoxylic acid	0.478651	1.11614	0.662366	149.025	50.512	5.45632	HMDB0001587	C02137	Benzenoids	Benzene and substituted derivatives	Benzoyl derivatives	61.958	10	10	158355	32444.6	100063	49048.2	68693.7	99668	28894.5	79040.6	30010.8	35262.5	59234.1	30137.5	39153.3	62477.5	166526	40157	75415.9	42059.6	29211.4	42583.7	46123.2	20896.9	60506.3	36723.8	43284.2	11666.7	76397.3	59751.5	52494.4	34534.7	36417.4	44210.4	65595.5
M165T120	[M-H]-	Phenyllactic acid	6.22559	1.38554	0.256992	165.056	119.57	2.4781	HMDB0000779	C01479				127.466	9	10	741883	3.60733e+06	7.34637e+06	3.70931e+06	3.8876e+06	1.87517e+06	5.30612e+06	4.6027e+06	552988	2.32682e+06	3.52799e+06	3.7397e+06	750090	811647	2.58489e+06	2.11572e+06	1.62265e+06	1.76265e+06	4.02332e+06	975494	3.05377e+06	1.53857e+06	958402	2.56386e+06	958880	503715	3.98565e+06	5.55667e+06	1.51709e+06	5.50218e+06	293868	4.8297e+06	2.80093e+06
M163T54	[M-H]-	Phenylpyruvate	0.529272	1.03766	0.889197	163.04	53.9435	0.439251	HMDB0000205	C00166	Benzenoids	Benzene and substituted derivatives	Phenylpyruvic acid derivatives	63.77	9	10	80747.1	98583.5	108451	105387	125180	52699.6	40589.8	6026.91	22433.6	61258.8	54143.7	44727.6	29201.7	46986	75783.2	44993.2	47418.8	38747.4	52398.8	74761.3	56912	86378.9	62154.4	44974.3	39892.4	30415.2	80407.6	91776.7	29543.2	42110.4	27296.5	34193.6	38239.1
M433T100	[M-H]-	Philanthotoxin 74	1.72323	0.875356	0.72462	433.332	100.134	1.76776			Organic acids and derivatives	Carboxylic acids and derivatives	Amino acids, peptides, and analogues	104.646	10	10	34597.4	104960	67637.5	73785.9	216319	120012	339650	319402	194412	779173	231519	607445	377238	305060	593428	363868	195205	143510	277536	377046	394560	256334	441281	284959	95796.7	420052	31849.4	267399	311575	244617	492734	132793	156017
M540T203	[M+CH3COO]-	Phosphatidylcholine lyso alkyl 16:0	0.95817	0.876418	0.690601	540.367	202.665	0.315208			Lipids and lipid-like molecules	Glycerophospholipids	Glycerophosphocholines	207.927	10	10	32350	37021	32883	69727.7	37054.2	99021.5	45045.7	43754.8	36600.5	52102.6	79281.1	51467.8	32179	109511	195947	48322.5	59913.2	48657.1	75592.7	160703	53996.8	85572.4	78475	35354.8	49658.4	25805.8	34495.4	62414.7	56157	62424.3	31536.2	65702.4	53395.1
M619T393	[M-H]-	Phosphonic acid, p-[2-[3-[[(1-benzoyl-4-piperidinyl)methylamino]carbonyl]-2-naphthalenyl]-1-(1-naphthalenyl)-2-oxoethyl]-	0.238346	1.62549	0.377682	619.192	393.462	1.36565						399.21	4	5	2834.22	2072.24	3488.95	20164.6	1805.21	3734.66	2744.49	3616.79	2453.29	2839.53	3059.75	3079.4	1513.77	3294.77	3840.09	6652.72	1875.92	3065.71	2261.32	10221.7	2580.08	1865.08	3468.85	2287.94	2813.12	1629.31	2504.56	7467.79	2076.47	8313.65	2485.87	2643.54	947.905
M850T179	[M-H]-	Pi(16:0/9-hode)	0.116157	0.918789	0.538536	849.516	179.277	1.59543			Lipids and lipid-like molecules	Glycerophospholipids	Glycerophosphoinositols	182.692	5	8	24330.1	8198.23	7187.77	7927.26	9036.22	3849.78	6340.43	7056.26	7328.54	6623.91	5499.58	6574.35	5278.2	4903.75	8143.81	5204.36	5350.11	5150.55	4561.86	8340.8	4555.96	8297.24	8248.65	5062.63	6869.8	7627.76	7213.16	5010.43	6862.91	8239.37	5407.03	4972.51	4536.78
M900T203	[M-H]-	Pi(18:0/12-hepe)	0.0534338	0.923318	0.518406	899.511	202.538	1.05569			Lipids and lipid-like molecules	Glycerophospholipids	Glycerophosphoinositols	207.422	10	9	5577.06	6741.25	8834.73	10566.1	3867.18	6932.11	11500.4	8662.26	7354.6	9055.56	7010.23	8050.39	10047.1	9582.56	10946.9	4880.84	6430.03	9271.26	8845.64	9127.71	7724.14	9180.04	7000.36	7125.73	9306.24	9957.12	7601.1	9355.59	9401.51	14208.6	11622.6	9028.41	4923.78
M902T201	[M-H]-	Pi(18:0/8,9-eet)	0.0887698	0.921877	0.581999	901.524	201.149	2.36701			Lipids and lipid-like molecules	Glycerophospholipids	Glycerophosphoinositols	207.489	3	7	8794.93	6419.37	6853.64	4280.96	5156.2	5219.78	6864.52	7884.32	8512.86	8221.28	5905.45	5746.72	7297.53	5695.51	4612.4	5389.2	5281.73	6146.15	6808.09	6616.61	8038.55	6051.83	4684.09	5637.18	7749.69	5830.18	5859.51	3980.88	7644.5	8320.57	9660.01	4548.09	2264.11
M897T36_4	[M-H]-	Pi(18:1/8,9-epete)	0.22294	0.893689	0.392554	897.497	36.258	3.07022			Lipids and lipid-like molecules	Glycerophospholipids	Glycerophosphoinositols	37.919	8	6	7123.4	8554.48	11911.3	22807.6	13071.5	17687.5	21822.5	19235.9	11286.3	29922.9	25778.9	24796.9	19183	12607	22058.3	14378.8	18190	11905.4	42699.9	18922.1	21153.5	18624.6	12371	19222.5	16879.1	17270.3	6245.7	19367	18506.2	16496.6	41479.8	24324.2	19642.9
M834T199	[M-H]-	Pi 34:2	0.970184	1.64346	0.18765	833.52	199.075	4.77148			Lipids and lipid-like molecules	Glycerophospholipids	Glycerophosphoinositols	205.058	10	9	109100	36850.4	168078	88672.1	45032	28569.8	38185.6	24351.3	10237	56150.1	22221.6	30966.5	17532.3	41025.4	13779.5	20903.1	28660.9	49835.5	19068.1	31547.4	41543.1	22124.1	19874.4	37120.2	135322	31511.6	141582	47172.9	17551.8	29687.6	16156.5	22706.6	35168.1
M858T197	[M-H]-	Pi 36:4	0.474946	1.24712	0.348099	857.52	197.408	1.57385			Lipids and lipid-like molecules	Glycerophospholipids	Glycerophosphoinositols	202.918	9	9	37274.7	16816	49304.4	37630.1	17552.9	12103.4	21490.7	15555.3	7177.05	30179.3	11636.7	18301.3	10602.3	23414	12680.6	10728.1	15093.7	21010.4	10848.3	20124.7	23424.7	11844.8	10065.5	15586.6	62545.4	12720.5	51118.1	22741.1	10482.1	17508.1	11180.8	14972.8	17706.3
M900T161	[M-H]-	Pi 39:4	0.134731	0.926652	0.574349	899.556	160.743	2.0131						170.453	4	8	46642	16734.9	16525.9	8526.31	16378.1	8886.49	12035.1	15151.3	10196.6	24121.2	12210.5	15500.1	19115.3	19830.3	10865.3	22762.5	12958.3	11538.5	10753.6	13401.1	13036.4	8857.26	9050.64	16250.5	12816.7	24789.4	21229.7	8714.2	12766	12557.4	35125.9	18384.2	10870.8
M914T166	[M-H]-	Pi 40:4	0.240562	0.791253	0.207573	913.569	165.789	3.34001			Lipids and lipid-like molecules	Glycerophospholipids	Glycerophosphoinositols	170.453	5	7	52048.5	10731.9	12271.4	6363.35	11831.3	5044.68	10008.8	10177.6	21939.2	14178.2	11002.6	7672.67	20262.4	14162.6	10311.4	9989.78	8455.33	5366.76	6548.66	9322.43	8404.26	7212	11983.2	9983.19	6247.35	11980.3	16889.1	10231.7	8277.3	8216.76	11363.4	8079.8	6191.37
M910T178	[M-H]-	Pi 40:6	0.169458	1.09996	0.586197	909.575	178.004	2.76783						181.829	6	7	24092.3	19285.1	23752.6	17595.7	24714	15261.3	34661.8	16215.5	27090.8	15518.2	22169.8	13795.8	11768.2	24758.8	23872.5	13239.3	16118.9	21770.1	12973.6	34662.4	19431.4	19685.8	24683.3	11236.7	29223.5	26150.7	24864.1	16967.2	12996.9	15454.9	15091.4	14546.7	8525.92
M441T314	[M-H]-	Picrolichenic acid	0.109495	0.892429	0.6438	441.199	313.523	2.60207			Benzenoids	Benzene and substituted derivatives	Benzoic acids and derivatives	316.56	9	7	4006.78	4115.14	5637.79	2128.02	5243.37	13580.6	1465.61	3064.43	3342.34	8259.08	11464.1	4741.3	3941.1	7525.15	5211.92	5730.39	5773.43	13298.8	7376.89	8508	7744.37	7302.73	2103.48	5858.1	10773.2	1589.79	5590.69	8236.89	6789.95	5039.15	11297.1	6867.85	5553.71
M159T50	[M-H]-	Pimelic acid	0.832323	0.825777	0.512134	159.045	49.916	1.6675	HMDB0000857	C02656	Lipids and lipid-like molecules	Fatty Acyls	Fatty acids and conjugates	51.79	7	5	24472.8	7652.21	9617.45	151589	12730.6	163177	163097	197110	31920.8	191547	183952	130599	276619	129696	211300	159196	202598	186036	185989	79466	177780	68379.3	69488.2	183179	24225.2	139770	7491.78	137988	160348	116967	267602	93243.4	118164
M358T52_2	[M-H-CH2O3]-	Pitavastatin	0.462734	0.660699	0.300756	358.169	51.505	3.47499	HMDB0041991	C13334	Organoheterocyclic compounds	Quinolines and derivatives	Phenylquinolines	59.585	7	6	10764.4	21798.1	39116	25441.8	15888.8	22531.1	36180.2	8565.03	31025.2	62685.8	55317.3	150783	14086.1	26643.6	10802.1	16919.3	19894.8	23842.1	76729.1	18351.7	58091.1	41265.9	13567.1	17683.9	13965.6	13213.9	2533.23	61264.2	21596	76170.7	82864.6	113029	25982.1
M389T336	[M-H]-	Polydatin	0.112811	1.09565	0.434383	389.125	336.351	2.39763	HMDB0030564	C10275	Phenylpropanoids and polyketides	Stilbenes	Stilbene glycosides	351.657	9	4	2720.89	2815.93	4111.4	2591.19	2862.64	5994.96	3732.56	4565.63	4705.97	4584.79	3803.17	1903.05	2482.84	2968.62	3752.01	3704.98	2793.87	2997.83	2406.72	2715.34	5465.33	4666.2	4072.18	1054.55	2038.08	2965.24	2595.02	5203.6	4198.58	3850.8	2190.1	4293.92	4418.28
M487T171_2	[M-H]-	Polygalic acid	3.41868	0.789275	0.556687	487.306	171.142	0.351779			Lipids and lipid-like molecules	Steroids and steroid derivatives	Hydroxysteroids	176.663	10	10	908709	3.10851e+06	882532	273610	2.57116e+06	204511	1.29349e+06	436347	1.33581e+06	470992	349028	1.40469e+06	690127	339332	436869	297786	291170	287141	590136	727107	376574	654036	423472	336738	671190	611854	1.09614e+06	183876	347504	329300	509551	939846	198143
M217T128	[M-2H]2-	Ponceau 6	0.0994735	0.939202	0.575772	217.018	127.853	9.20432			Benzenoids	Naphthalenes	Naphthalene sulfonic acids and derivatives	131.655	3	7	24303	43076.2	14519.4	27295.9	20784.3	32367.1	30366.8	39111.6	46890.4	35533.2	33210.1	29392.4	40149.2	36207.7	40263.5	33632.8	37018.1	37586.6	23064.9	32156.4	27087.6	16871.9	41468.2	28228.2	33017.8	29688.2	27234.7	26288.3	23671.3	30995.9	37339.7	29462.4	27673.7
M225T339	[M-H]-	Porphobilinogen	0.136378	0.919792	0.708986	225.113	339.095	2.41498	HMDB0000245	C00931	Organic nitrogen compounds	Organonitrogen compounds	Amines	344.403	10	8	3061.28	5734.43	5078.6	10008.4	2763.38	8483.89	6252.06	13202.1	5870.73	8493.94	8320.28	5006.59	8157.85	5451.95	14746.7	9789.65	5984.38	6783.98	7951.33	6793.45	6048.97	4764.36	12978.1	5242.41	14717	5870.07	5571.07	7403.38	7369.68	5758.48	10987.1	5938.15	4847.08
M395T49_4	[M-H]-	Pregnenolone sulfate	0.280007	0.974373	0.848514	395.21	49.164	2.42055	HMDB0000549	C01770	Lipids and lipid-like molecules	Steroids and steroid derivatives	Sulfated steroids	56.281	10	9	138958	153982	132702	209548	134605	170091	163820	172654	47456.4	231034	177401	174960	276947	168828	167780	224412	213046	204135	152201	226688	369881	196454	75720.5	163558	240345	175887	253266	191850	151291	171039	192460	197464	125356
M463T26_2	[M-H]-	Pristimerin	2.65232	0.905657	0.534308	463.289	26.453	0.380197		C08633	Lipids and lipid-like molecules	Prenol lipids	Triterpenoids	28.741	10	10	1.48357e+06	5.70648e+06	2.61241e+06	4.34116e+06	4.11293e+06	2.82062e+06	4.19914e+06	3.59433e+06	3.33433e+06	5.05875e+06	4.20511e+06	6.76113e+06	4.95734e+06	2.39518e+06	1.13454e+06	2.71128e+06	3.1911e+06	3.58415e+06	6.02639e+06	2.0228e+06	4.80716e+06	4.54504e+06	2.39855e+06	2.62213e+06	3.04089e+06	4.40482e+06	3.01604e+06	3.41957e+06	4.08758e+06	4.01615e+06	6.27334e+06	5.00903e+06	3.30762e+06
M515T68	[M-H]-	Probucol	0.895952	0.934395	0.804862	515.304	67.8215	2.65309	HMDB0015537	C07373	Benzenoids	Benzene and substituted derivatives	Phenylpropanes	97.28	10	10	373558	377809	310169	1.00382e+06	229077	344085	1.10188e+06	594725	1.18738e+06	525837	1.23932e+06	1.30729e+06	2.0219e+06	500049	595317	719820	649571	393414	1.42608e+06	1.04039e+06	963037	498760	291895	1.15455e+06	297169	1.49601e+06	418683	1.17643e+06	1.31177e+06	553585	1.78301e+06	372377	1.06229e+06
M313T80	[M-H]-	Progesterone	5.59046	1.23894	0.589743	313.239	79.688	0.530883	HMDB0001830	C00410	Lipids and lipid-like molecules	Steroids and steroid derivatives	Pregnane steroids	81.386	8	9	1.45031e+06	1.83531e+06	1.02449e+07	1.85643e+06	8.65444e+06	2.20608e+06	2.1339e+06	1.68366e+06	2.00462e+06	3.48065e+06	1.95542e+06	1.96999e+06	2.21118e+06	1.72991e+06	2.6727e+06	1.86076e+06	2.18875e+06	2.45987e+06	1.27179e+06	2.91441e+06	1.54356e+06	3.32707e+06	1.8988e+06	1.84024e+06	2.28488e+06	2.26431e+06	6.69012e+06	2.7099e+06	1.56592e+06	1.5244e+06	1.52883e+06	2.13787e+06	1.97287e+06
M232T133	[M+OH]-	Propanedinitrile, 2-[(3-hydroxy-4-nitrophenyl)methylene]-	0.717354	0.800118	0.298511	232.028	133.367	0.795857			Benzenoids	Phenols	Nitrophenols	141.595	7	5	38228.9	27503.1	23118.3	45225.7	35386.1	75235.7	82282.8	95646	49014.3	88035.8	69424.9	59500.4	81302	98396.5	125703	52872.5	104245	87997.2	46309.1	67462	45182.5	48935.8	47831.6	93078	54967.5	60817	22858.9	96863.4	73658.8	84220.9	67105.2	63796.9	68607.3
M590T347	[M-H]-	Propanoic acid, 2-[[1-[3-[4-([1,1'-biphenyl]-4-ylcarbonyl)-2-propylphenoxy] propyl]-1,2,3,4-tetrahydro-5-quinolinyl]oxy]-2-methyl-	0.144972	0.564918	0.217579	590.279	347.211	0.0779777			Benzenoids	Benzene and substituted derivatives	Benzophenones	361.771	8	6	2071.17	3091.38	2859.88	4726.59	2842.97	5224.85	2368.11	2476.35	2578.4	3800.83	3738.22	8199.77	2474.9	4612.84	2924.3	2871.77	1226.5	5674.36	3122.36	1849.67	3314.97	6622.84	1318.03	2254.74	14631	1904.29	2010.38	4219.37	2737.36	10498.8	6150.91	13750.7	6243.17
M336T133	[M-H-C7H3F2NO]-	Propanoic acid, 2-[[4-[2-[[[(2,4-difluorophenyl)amino]carbonyl]heptylamino]ethyl]phenyl]thio]-2-methyl-	0.15561	0.909535	0.47848	336.223	132.505	5.13667			Benzenoids	Benzene and substituted derivatives	N-phenylureas	135.634	10	9	20136.9	53490	17626.7	41071.4	32807.5	38244.9	61870.2	41992.9	27155	111717	40055	75616.9	49395.1	36456.4	79537.3	38842	40424.2	28358.5	71874.7	11209.7	48350.7	49642.5	32602.4	37446.9	19290.1	51020	22269.3	39674.7	40616.5	39061.8	86621.8	39122.5	40125.3
M501T108	[M-H]-	Propanoic acid, 2-[[4-[2-[[(cyclohexylamino)carbonyl](4-cyclohexylbutyl)amino]ethyl]phenyl]thio]-2-methyl-	2.14339	0.777109	0.452292	501.321	107.516	4.9331		C15622	Organosulfur compounds	Thioethers	Aryl thioethers	118.677	10	10	215156	645291	389579	120681	433613	133481	540911	149894	119628	249353	232417	1.92805e+06	751740	254699	377658	181855	290932	174047	247450	348443	412627	241728	164585	176866	296762	204355	310351	214261	275013	250800	448551	386525	167504
M73T386	[M-H]-	Propionic acid	0.780547	1.31372	0.470408	73.0294	385.838	0.0155825	HMDB0000237	C00163	Organic acids and derivatives	Carboxylic acids and derivatives	Carboxylic acids	388.311	10	10	74878.6	15784.6	51765.7	203949	31733.4	29358	76874.1	153027	15462.1	44455	53832.6	77272.6	9552.38	63621.6	39172.2	41655.6	47672.8	73057.1	25783.3	63491.7	113894	44347.6	21486.7	42700.6	54875.8	17460.3	27988.2	160482	28335.7	147924	9991.2	114078	23757.4
M247T228	[2M-H]-	Propylphosphonic acid	1.30706	1.85874	0.343214	247.063	228.056	6.77676			Organic acids and derivatives	Organic phosphonic acids and derivatives	Organic phosphonic acids	251.544	9	7	6965.96	8802.68	2197.08	335747	5133.31	105382	72196.2	121316	6956.9	57107	74135.5	34813.2	6156.46	4824.49	47307.5	91276.1	25997	50926.7	69826	26769.1	207735	21256.2	81837.3	71148.3	18994	4628.76	2959.66	312175	14459.9	160140	13833.3	30027.2	109302
M349T152	[M-H]-	Prostaglandin d3	0.825683	1.48329	0.255188	349.202	152.428	1.0572		C13802	Lipids and lipid-like molecules	Fatty Acyls	Eicosanoids	177.751	6	7	123053	23145.7	47215.9	51818.1	43536.4	56276.6	66659.5	116727	83374.3	37778.6	73384.1	81353.3	93626.2	63207.4	80906.9	83085.6	118072	77720.6	41642.5	51172.4	91401.9	59463.6	56605.7	134829	42818.3	94297.9	88697.3	99610.8	71042.7	46480.5	54909.6	52657.5	73664
M331T101_2	[M-H-H2O]-	Prostaglandin e3	0.466958	0.873167	0.602795	331.191	101.16	0.460756	HMDB0002664	C06439	Lipids and lipid-like molecules	Fatty Acyls	Eicosanoids	105.666	6	6	198470	48241	57422.2	42895.8	61721.5	58576.3	17342.6	65470.3	51577.8	83519.6	104932	99553.8	37432.1	199084	107628	52277.1	61740	55212.9	51709.5	90213.3	60444.1	61987.8	186535	50571.9	45935.7	32536.5	91667.5	41616.5	43202.4	43470.2	59403.6	46804.9	73217.9
M357T140	[M-H]1-	Prostaglandin f2.alpha.	0.147953	1.05767	0.679751	357.264	140.117	4.31934		C00639	Lipids and lipid-like molecules	Fatty Acyls	Eicosanoids	145.354	5	6	103484	65674.2	114041	32508	70139.8	55379	49891.1	59180.3	50730.8	51004.5	83232.5	63916.7	100579	87710.7	52583	60641.7	65285.6	33490.5	50416	100295	50578.1	76681.3	45376	45445.4	127828	57314.9	167089	42675.8	44833.2	63487.7	128651	72775.6	74756.5
M353T183	[M-H]-	Prostaglandin f2.beta.	0.255643	0.923764	0.649865	353.233	182.755	0.59759	HMDB0001483	C02314	Lipids and lipid-like molecules	Fatty Acyls	Eicosanoids	190.103	6	7	42036.4	27927.1	35309.8	73257.9	33163.7	49046.8	88747.3	96148.1	96578.9	47942.7	62120.4	42526.9	102098	94609.5	64731.9	53057.1	88189.2	61325	62648	33717.6	99673.7	38044.1	32229	79195.4	66151.5	74274.3	35727	42386	40858.8	64799.7	81109.9	57097.5	45067.1
M351T37	[M-H]-	Prostaglandin i2	5.33239	1.31807	0.577488	351.221	36.791	2.14771	HMDB0001335	C01312	Lipids and lipid-like molecules	Fatty Acyls	Eicosanoids	48.503	10	10	3.42357e+06	9.28735e+06	181552	2.12473e+06	885643	2.3308e+06	2.44542e+06	5.05986e+06	1.0325e+06	4.34281e+06	4.97595e+06	7.75325e+06	1.52725e+07	631193	2.38283e+06	9.84572e+06	4.38864e+06	1.2028e+06	2.26199e+06	419650	3.48686e+06	819178	1.76362e+06	5.75614e+06	220462	1.05986e+07	1.55066e+06	1.8811e+06	1.02402e+07	7.79823e+06	6.06009e+06	1.2912e+06	2.00343e+06
M215T371	[M-H]-	Pro-Thr	0.114312	0.82623	0.681879	215.114	371.393	1.44962	HMDB0004620		Organic acids and derivatives	Carboxylic acids and derivatives	Amino acids, peptides, and analogues	374.861	9	9	152374	1375.45	28275.7	5369.4	8690.17	3453.14	3810.85	2243.05	16304.3	5110.62	9053.77	2700.94	3134.2	11587	5067.57	3355.57	1937.77	2305.32	4427.27	11487.1	1730.96	3449.8	2688.57	616.774	5105.44	902.263	66114.7	2080.9	3866.12	2074.1	2859.46	6902.17	1505.88
M243T243_2	[M-H]-	Pseudouridine	1.45053	0.762565	0.693989	243.063	242.929	0.0904134		C02067				246.15	10	10	23378	35481	23727	30250.6	105585	22073.3	141112	30250	37948.7	89364.9	60215.6	49382.6	13792.8	145154	485814	42076.2	47546.5	18836.3	17497.4	351696	21811.9	48931.8	176324	14120.7	25905.7	17534.8	10872.6	27162.6	13790.6	11575	8269.08	26738.9	45653
M357T70	[M-H]-	Psoromic acid	2.19535	0.87027	0.508371	357.079	70.374	1.42513						81.929	10	10	1.58823e+06	552831	599548	556333	544446	1.04939e+06	543702	968881	1.24135e+06	390342	1.79787e+06	580394	272672	1.52481e+06	1.50948e+06	597085	1.0272e+06	1.02088e+06	610852	1.39003e+06	780715	420216	836052	493992	1.02038e+06	193243	555870	593651	362749	627557	670099	894091	759725
M171T37	[M-H]-	P-toluenesulfonic acid	0.37872	1.15811	0.661331	171.012	36.92	0.666497	HMDB0059933	C06677	Benzenoids	Benzene and substituted derivatives	Benzenesulfonic acids and derivatives	49.132	10	10	643118	150735	550435	97024	244472	114967	35964	186180	69709.4	66785.1	63058.5	65360.4	122103	200757	58985.6	122093	81282.8	123396	71322.2	478060	75830.7	113812	50197	55508.7	642848	93470.5	404211	39426.7	68823.9	337436	114474	397592	136923
M511T401	[M-H]-	Pumiloside	0.106737	1.16399	0.477284	511.178	400.877	1.9531		C16723	Organic oxygen compounds	Organooxygen compounds	Carbohydrates and carbohydrate conjugates	423.448	8	8	2339.97	1314.45	2598.94	6437.61	1578.83	2191.57	3251.11	3743.68	3149.56	4086.92	2906.49	5902.6	3106.92	6212.57	3663.93	1309.56	3666.35	7732.1	5137.71	4581.37	5021.16	4261.63	3666.37	2166.23	6896.71	6343.45	1995.36	2963.99	3591.22	3988.12	1495.55	5094.94	2484.69
M412T53	[M-H-C4H8]-	Pyrazino[1',2':1,6]pyrido[3,4-b] indole-3-propanoic acid, 1,2,3,4,6,7,12,12a-octahydro-9-methoxy-6-(2-methylpropyl)- 1,4-dioxo-, 1,1-dimethylethyl ester, (3s,6s,12as)-	0.333956	0.766676	0.421925	412.18	53.083	5.0682			Organoheterocyclic compounds	Indoles and derivatives	Pyridoindoles	71.967	8	6	12135	23272.4	24071.9	26854.4	21175.5	24134.9	15532	20406.5	9276.3	30259.8	31991.5	140522	21493	23329.3	25085.7	7038.91	23903.4	25754.1	86699	9271.89	37767.9	33582.1	14766.3	13779.7	20604.9	21253.2	4108.68	23430.1	7450.74	22838.6	44371	93270.7	8883.28
M110T200	[M-H]-	Pyrrole-2-carboxylic acid	0.0908961	1.04989	0.92821	110.036	199.893	1.78422	HMDB0004230	C05942	Organoheterocyclic compounds	Pyrroles	Pyrrole carboxylic acids and derivatives	205.058	6	5	4072.67	856.557	12129.8	1269.95	4089.39	1428.05	750.362	1370.44	1448.66	3570.72	3086.47	1868.23	665.273	1409.25	5506.32	1462.6	1240.84	1161.47	1611.59	1448.52	1107.82	1075.95	1316.35	1026.13	1087.19	1123.63	579.911	1709.89	986.034	747.249	2768.86	1771.62	1430.31
M71T176	[M-H]-	Pyruvaldehyde	0.413056	1.13877	0.481107	71.0137	176.087	2.85873	HMDB0001167	C00546	Organic oxygen compounds	Organooxygen compounds	Carbonyl compounds	190.725	9	5	16946.4	20819.8	19221.8	30876.5	19768.6	30537.6	23660	34622.2	17186.2	24966.6	26480.8	30972.2	30234.3	21557.6	21187.2	23450	22919.2	29144.7	27830.7	18691	28459.5	25690.5	23885.2	21259.5	19877.8	30330.3	16039	20010.4	21106.8	22424.4	26805.1	25785.9	19151.3
M87T131	[M-H]-	Pyruvate	4.08577	0.608017	0.564155	87.0085	130.934	2.16681	HMDB0000243	C00022	Organic acids and derivatives	Keto acids and derivatives	Alpha-keto acids and derivatives	140.796	5	6	81652.2	83598.4	78974.1	283456	149601	74177.2	136449	57885.5	994970	84063.6	6.52802e+06	23365.8	29530.6	5.01207e+06	78487.1	854821	950337	1.22702e+06	48682.9	2.32814e+06	87873.7	1.07381e+06	55803.7	84377.1	3.05396e+06	21139.5	664890	139503	75947.7	51917.3	1.48785e+06	1.16824e+06	93047.3
M485T93	[M-H]-	Quillaic acid	1.35755	0.779869	0.334223	485.326	93.366	5.40028		C08972	Lipids and lipid-like molecules	Prenol lipids	Triterpenoids	102.258	10	10	158128	403154	245130	90460.4	216687	89952.2	343462	170093	123900	173788	77256.4	607205	531109	166194	196340	101018	181142	61886.3	166085	222689	114337	153877	220650	70758.1	124823	139022	327713	127753	98621.2	97095.8	111434	229960	101922
M160T181	[M-H]-	Quinoline-2,4-diol	0.531491	0.943585	0.768795	160.04	180.982	0.884451		C16716	Organoheterocyclic compounds	Quinolines and derivatives	Quinolones and derivatives	188.862	9	5	19225.4	19819.8	14950.4	52174.6	17823.5	56072.3	45927.4	40715.8	29220.2	52223	53320.8	40776.7	28255.7	50325.7	56080.1	45967.3	64995.7	84744.2	48103	39216.4	56778.7	30395.9	73044.7	59238.8	41732	26477	13726	47526.5	55043.3	43493.3	76330	50418.5	43743.2
M160T65_2	[M-H]-	Quinoline-2,8-diol	5.27154	0.65673	0.216506	160.04	64.812	0.770675			Organoheterocyclic compounds	Quinolines and derivatives	Quinolones and derivatives	66.271	8	9	848414	917610	1.40754e+06	530502	957197	830158	1.44937e+06	830041	2.77338e+06	850927	2.48189e+06	331811	1.17856e+06	3.78025e+06	4.92911e+06	451131	1.91979e+06	566281	855817	3.04381e+06	636118	1.09621e+06	1.03194e+06	566790	677024	952090	224429	599707	403095	655289	552855	1.37365e+06	799568
M457T449	[M-H]-	Raltitrexed	0.644331	1.61267	0.189168	457.12	448.987	1.23431	HMDB0014438	C11372	Organic acids and derivatives	Carboxylic acids and derivatives	Amino acids, peptides, and analogues	466.935	10	10	20001.9	4557.61	27242.7	47848.6	4630.12	60187.4	20333.9	27501.6	5802.66	34860.6	13470	17982	3093.13	9204.26	31119.8	15954.1	11813.3	18820.4	12520.3	8730.63	56303.3	19946.5	23010.9	18661.9	5877.26	3288.19	16138	46102.5	9826.38	23904.8	4653.79	18078.2	19213.6
M353T27	[M-H]-	Rauwolscine	0.818688	1.075	0.828159	353.2	26.953	1.64169						28.937	8	9	75408.7	105790	84867.9	91712.9	66277.6	391884	107327	166016	95086.7	153474	139207	81613.7	201121	529026	96074.9	138681	160778	242564	99521.1	87288.8	116713	135125	130996	184445	193657	219473	230209	152747	94214.4	101396	143012	92694.8	157645
M285T207	[M-H]-	Retinol	0.383339	0.839696	0.564551	285.207	206.697	1.19069	HMDB0000305	C19962	Lipids and lipid-like molecules	Prenol lipids	Retinoids	212.237	10	10	11627.3	27234.2	17357.3	10109.8	21393.9	6665.03	9708.22	8205.17	50293.3	14056	14664.8	35345.8	16720.1	19385.9	18015.7	6053.46	8777.48	7145.71	10754.7	16965.4	15182.4	6080.93	6411.23	6765.5	10149.2	10869.6	17287.9	8686.59	5897.22	9936.6	20018.3	10322.8	4922.89
M421T326	[M+HCO2]-	(-)-riboflavin	0.0575468	0.931428	0.73895	421.136	325.952	0.716934	HMDB0000244	C00255	Organoheterocyclic compounds	Pteridines and derivatives	Alloxazines and isoalloxazines	328.696	7	5	5033.45	3503.42	3236.62	1464.27	3022.62	7310.48	5035.26	5522.37	3494.56	3699.72	3821.78	6411.14	6195.33	3221.19	5103.18	6150.6	2534.08	3157.69	5098.49	3207.75	18033.4	4607.64	10797.1	4505.14	3634.31	8731.34	3504.99	6021.16	5454.09	12291.8	8214.98	2941.33	2726.54
M297T59	[M-H]-	Ricinoleic acid	8.31644	1.07167	0.731805	297.244	58.695	2.27127	HMDB0034297	C08365	Lipids and lipid-like molecules	Fatty Acyls	Fatty acids and conjugates	60.79	10	10	5.26459e+06	9.58386e+06	1.69138e+07	8.43426e+06	1.82864e+07	6.09576e+06	5.91348e+06	8.5633e+06	1.37087e+07	1.29436e+07	7.95019e+06	1.15939e+07	1.15662e+07	6.62412e+06	8.64133e+06	6.39837e+06	5.48967e+06	6.13161e+06	7.41719e+06	7.68474e+06	5.08825e+06	7.97847e+06	5.37889e+06	5.13792e+06	5.56407e+06	1.19155e+07	1.07768e+07	6.60881e+06	5.26348e+06	5.84379e+06	1.28461e+07	7.25482e+06	6.87584e+06
M845T172	[M-H]-	Rifabutin	0.0552986	0.787506	0.510101	845.449	171.561	2.77912		C07235				175.893	9	8	46409.1	6736.49	26506.2	13036.2	24662.3	4830.31	26059.8	4826.72	2901.69	10131.8	11447.8	17357.5	6344.31	8987.42	8424.28	13572.8	5019.3	7069.14	4387.2	11356.6	5876.52	9077.83	10674.7	4182.31	33657.6	3363.25	43551.3	7288.69	1758.39	8522.7	6575.1	18497.7	9618.18
M341T303	[M+HCO2]-	Rosin	0.280532	1.17348	0.533143	341.146	303.216	1.95825			Lipids and lipid-like molecules	Fatty Acyls	Fatty acyl glycosides	307.535	4	6	9734.41	4201.54	5986.07	10071.6	2941.86	19702.3	11324.8	8831.43	6448.85	11647.4	12912.4	6878.06	5409.79	5781.61	13852.6	13871.3	8988.34	5354.13	11393.7	17978.9	10242.5	3332.51	3814.61	8932.7	9914.29	5962.47	5243.62	11068.9	3978.82	8560.89	8945.99	5592.3	9296.99
M355T351	[M-H]-	Rutamarin	0.0791247	0.900954	0.55388	355.163	350.977	0.625248	HMDB0030666	C09308	Phenylpropanoids and polyketides	Coumarins and derivatives	Furanocoumarins	364.247	7	8	3785.87	2287.97	4829.78	5637.32	2178.86	5950.24	5137.03	5512.49	7815.43	5464.51	4747.26	4454.78	2744.04	3379.39	4357.35	4692.37	6450.29	7442.53	5734.25	6266.33	4844.45	6014.76	4054.15	3174.01	6309.67	3116.51	3991.78	5555.04	3747.92	5925.05	4694.68	7950.21	4122.37
M319T99	[M-H-CO2]-	(s)-10-hydroxycamptothecin	0.307494	0.859326	0.274162	319.086	98.889	0.685258		C17939				108.527	8	9	71226.2	207530	238620	133246	222182	132465	111460	160611	66340	146126	137034	124390	191567	177465	226890	148125	212015	58123.1	138236	228703	225551	166454	82163.3	177035	301123	171070	137389	127529	122659	181488	129131	289956	120976
M147T394	[M-H]-	(S)-2-Hydroxyglutarate	0.457458	1.34348	0.393797	147.03	393.525	0.314267	HMDB0000694	C03196	Organic acids and derivatives	Hydroxy acids and derivatives	Short-chain hydroxy acids and derivatives	397.031	8	9	60162.9	22521.9	144203	64465.5	44751.3	21986.7	24156.1	41908	40668.4	26358.1	31861.9	27906.5	14573.5	57553.1	34194.5	28214.3	17767.4	32211.4	28392.5	69919.5	23515.7	16371.8	16442.1	12825	54221.5	12410.3	64134.8	35097.2	14297	31550.8	11486.5	64010.4	14780.8
M779T157_2	[M-H]-	Saikosaponin a	0.0979214	0.879179	0.439443	779.439	156.92	4.95754		C08975	Lipids and lipid-like molecules	Prenol lipids	Terpene glycosides	159.572	7	4	7505.35	10644.9	8884.27	13809.6	9444.28	9597.81	10022.2	14237	10538.2	16471.1	11086.5	14171.8	8577.9	7432.87	24031.2	13119.7	4154.33	10685.9	16553.1	11734.4	14582.5	5601.86	17616.1	10009.7	8611.64	10173.6	8178.14	12175.3	8973.9	6618.87	12254.8	12990.8	14265.1
M137T180	[M-H]-	Salicylic acid	0.816134	1.20636	0.559859	137.024	180.244	1.12322	HMDB0001895	C00805	Benzenoids	Benzene and substituted derivatives	Benzoic acids and derivatives	187.542	10	10	73449.8	41971.6	168077	68301.3	93607.3	41167.4	41122.5	41877.1	62780	28381.7	45143.2	33384.5	21081.9	51369.7	46032.3	45993.2	39853.4	41966.1	24899.6	43937	36217.2	27396.8	35371.3	27935.3	71274.5	18683.9	157240	42961.9	27896.4	61315.1	14943	61202.8	88058.8
M227T292	[M-H]-	Salicylic acid benzyl ester	0.171991	0.924383	0.647611	227.058	291.874	9.08613	HMDB0029818		Benzenoids	Benzene and substituted derivatives	Benzoic acids and derivatives	296.445	10	10	14594.3	10207.2	15810.8	33587	19976.1	29307.8	43651.7	45699.1	27417.6	44605.1	27376	58436.1	51199.6	29810.2	40638.7	51022.1	31123.3	27921.4	54315.6	20225.5	35415.8	35244.5	39472	42384.9	20053.1	46644.8	15984.4	32320.8	53748.9	26510.1	39790.6	36664.1	48135.9
M194T239	[M-H]-	Salicyluric acid	0.111778	1.00358	0.992952	194.046	239.315	0.00434007	HMDB0000840	C07588	Benzenoids	Benzene and substituted derivatives	Benzoic acids and derivatives	241.685	7	8	2686.12	2501.72	13617.1	2869.77	5546.1	3083.4	5846.56	3303.26	2575.1	6205.1	4157.26	3956.55	926.836	7151.22	20473.5	2659.3	3180.77	3036.61	3116.3	10097.1	2857.4	3544.54	9562.02	2932.64	2834.88	2399.56	2549.37	2887.15	3261.55	2617.62	2855.1	2847.24	3513.87
M599T280	[2M-H]-	Salidroside	0.0244656	0.986897	0.960342	599.237	279.574	1.23392		C06046	Organic oxygen compounds	Organooxygen compounds	Carbohydrates and carbohydrate conjugates	291.184	8	6	1856.6	4648.29	2366.27	6755.82	2431.46	3143.14	13764.6	2680.88	1650.1	6290.94	5909.32	7568.25	2199.31	1146.2	2074.85	4246.67	2136.78	2492	8828.27	2829.71	9403.35	7362.87	2220.74	1785.02	2939.81	2649.92	1751.34	6508.06	2608.24	17577.9	3494.26	6405.93	1811.65
M414T273	[M-H]-	Salmeterol	0.0936832	0.635996	0.401109	414.243	272.761	1.45139	HMDB0015073	C07241	Benzenoids	Benzene and substituted derivatives	Benzyl alcohols	288.3	5	6	6766.69	11825.9	20479.5	6543.42	75404.2	16950.1	5039.89	12521.3	10691.7	8259.95	1678.96	8077.24	5625.82	20349.5	10620.4	6319.47	5845.4	10442.3	7074.75	31985.3	4516.78	8348.94	5605.69	5401.76	47039.9	2429.65	5762.11	6998.68	5337.46	10604.9	6683.9	12574.4	6087.95
M88T351	[M-H]-	Sarcosine	0.9222	1.11143	0.802365	88.04	351.052	4.9362	HMDB0000271	C00213	Organic acids and derivatives	Carboxylic acids and derivatives	Amino acids, peptides, and analogues	362.843	10	10	90335.9	91076.3	295316	94614.9	208282	76445.9	47012.5	91715.5	107641	43842	75759	50961.5	14899.7	79682.1	107887	47295.5	27972.3	40626.1	34370.1	101710	45163.4	53771.8	52157.3	12695.2	90647.7	12831.7	53045.5	69185.4	18235.9	54159.8	23458.9	103071	44168.3
M535T47	[M-H]-	Senegenin	0.946477	1.06898	0.898703	535.274	47.178	0.477851			Lipids and lipid-like molecules	Steroids and steroid derivatives	Hydroxysteroids	48.502	7	7	56348.4	429710	30400.8	36205	46110.6	27322.3	98646.9	67285.4	72206.2	47745.9	26204.3	158651	144226	25894	34948.1	38524	51586.8	36692.2	60194.3	32993.7	23056.8	46419.4	22204.2	56989.9	43140.7	65208.3	44472.7	30326.4	52942.2	35464.4	68184.5	49842	26958.8
M205T338	[M-H]-	Ser-Thr	0.183435	0.952954	0.83364	205.083	337.597	1.61189			Organic acids and derivatives	Carboxylic acids and derivatives	Amino acids, peptides, and analogues	353.347	10	9	1235.09	4288.55	9993.16	8902.31	7858.67	17391.1	4735.23	9228.31	10276.3	7630.12	8643.8	3335.73	2872.64	11784.5	4877.3	6212.96	6221.15	9776.24	5878.96	12083.9	6340.6	9303.28	6373.33	3215.62	29218	2552.42	2719.22	15950.2	3981.5	9390.58	4213.12	10891.5	6783.63
M499T403	[M+OH]-	Silydianin	0.870902	1.88641	0.256065	499.131	402.93	2.32417			Phenylpropanoids and polyketides	Flavonoids	Flavans	421.381	10	8	7171.27	3880.61	3840.24	88819.1	2132.91	108742	12288.7	69581.3	3415.62	51722.9	29269.9	7590.27	3646.22	31604.5	23461.4	26709.2	23768.4	57595	20614.2	36782.9	51008	25384.7	15086.4	15286.1	11122	6289.29	4375.59	82896.3	13814.9	34552.8	10256.6	23007.5	7440.4
M748T186	[M+CH3COOH-H]-	Sm d33:1	0.0363649	0.768277	0.133491	747.567	185.507	4.54898						190.338	9	10	3721.05	2735.71	3781.05	2230.15	4313.33	2506.34	3501.55	1487.5	2193.94	2718.63	3486.55	3094.62	1950.49	1783.85	1952.1	1102.71	2010.62	2096.15	3586.99	1988.96	2565.58	3563.34	2248.01	1560.27	1681.4	2015.56	3407.4	2726.52	2559.21	2783.66	1780.38	4264.86	2084.7
M762T185	[M+CH3COOH-H]-	Sm d34:1	0.0825721	0.842322	0.27342	761.583	184.773	0.155604			Lipids and lipid-like molecules	Sphingolipids	Phosphosphingolipids	189.468	10	10	19124.9	15485.6	28399.5	17741.6	25863.8	22833.9	23455.3	13849.1	18888	18548.3	25961.6	18392	14082.2	14248.1	14506.5	11826.2	15501.6	17127	28247.1	11828.6	14528.9	24252.7	13549.8	12531.3	16713.2	9350.34	11910.5	24510.9	17445.4	19681.6	8853.37	22921.8	17652.2
M861T45	[M-H]-	Smiglaside c (not validated) + 1acetyl	0.363	0.956292	0.873295	861.248	45.2845	1.54513			Organic acids and derivatives	Carboxylic acids and derivatives	Hexacarboxylic acids and derivatives	47.249	8	9	10043.4	5777.86	19761.2	57352.6	21412.7	9924.13	24494.3	21415.3	8400.98	35628.6	32399.9	55862.2	12666	16814.5	13015.1	46727.1	19129	56912.2	32326.3	7078.12	114339	56428.9	26900.3	33023	22957.4	27051	24220.7	18042	24199	9506.85	13651.1	43205.9	33580.8
M428T348	[M-H]-	Smz-pto	0.0477014	1.06452	0.723202	428.088	347.728	0.496347			Benzenoids	Benzene and substituted derivatives	Benzenesulfonamides	349.185	8	7	3493.73	2028.84	2751.79	1139.1	2527.69	1295.1	1476.82	1968.72	1149.97	2364.74	1682.2	2785.74	2248.66	2324.95	1412.46	1129.7	2580.7	1569.19	1687.62	2631.95	1516.87	1505.98	1187.21	1197.32	2605.83	1180.67	1950.1	1232.96	1378.62	1417.27	1771.8	1477.23	1410.6
M214T394	[M-H]-	sn-Glycerol 3-phosphoethanolamine	0.48974	1.28929	0.466796	214.048	393.51	0.787928			Lipids and lipid-like molecules	Glycerophospholipids	Glycerophosphoethanolamines	405.305	10	10	1562.1	4814.67	4227.7	31195.3	1195.3	47099	13417.7	33639.3	2950.29	21400.5	33482.8	26056.5	16091.3	12939.9	27312.5	43736.3	40417	31184.2	21869.8	23002.2	37631.8	19403.7	21183	26519.4	15487.4	11674.7	2168.37	44076	29122.7	40462.7	21310.8	11810.5	19153.1
M928T280	[M-H]-	Soyasapogenol b base + o-hexa-hex-pen	0.146329	0.572341	0.0235331	927.503	280.272	4.04153			Lipids and lipid-like molecules	Prenol lipids	Terpene glycosides	297.44	3	7	2101.47	1504.44	1137.1	3167.19	6344.05	1558.83	2467.92	1405.45	3330.67	3930.54	1573.29	3996.82	4847.35	1398.53	1099.46	4341.71	1252.29	1195.94	2421.33	664.547	2690.82	2141.11	1106.79	1092.05	5138.2	2078.51	3955.34	2452.99	1434.16	3831.98	3815.61	2956.05	1518.87
M1068T275	[M-H]-	Soyasapogenol b base + o-hexa-hex-pen, o-c6h7o3(ddmp)	0.0119868	1.0127	0.964204	1067.55	274.819	3.76896	HMDB0038721		Lipids and lipid-like molecules	Prenol lipids	Terpene glycosides	286.054	10	9	2266.86	2394.86	794.979	5039.22	1170.85	1890.87	5431.09	1074.91	753.445	5437.92	3076.19	3110.07	7130.08	1815.21	2379.12	3930.27	3175.4	859.065	3846.65	2580.21	3838.15	8362.82	1905.48	1866.98	7961.96	3969.46	2104.58	5261.81	2848.69	10335	2761.41	2515.51	2504.9
M765T236	[M-H]-	Soyasapogenol b base + o-hexa-pen	0.242783	1.08102	0.798056	765.445	235.665	0.845466	HMDB0039518		Lipids and lipid-like molecules	Prenol lipids	Terpene glycosides	238.405	10	10	30791.5	6683.46	27133.8	12663.5	15585.3	9379.48	7167.38	10264.9	2777.95	9176.93	6651.01	8192.71	6637.52	4083.44	6195.54	14056.9	6827.3	6670.55	4630.14	6280.14	4480.55	9569.39	6101.71	6872.72	16350.2	5211.08	39903.2	11282.6	4624.84	20786.9	3419.76	17819.5	8419.49
M1038T263	[M-H]-	Soyasapogenol b base + o-hexa-pen-dhex, o-c6h7o3	0.0370544	1.10335	0.704333	1037.54	263.005	1.95671			Lipids and lipid-like molecules	Prenol lipids	Terpene glycosides	264.254	10	8	2256.9	4077.66	983.887	6207.86	1557.4	2689.52	4621.79	906.797	718.596	4973.68	4355.04	3005.9	6273.32	2223.96	2191.42	3956.18	2657.91	2556.29	3061.09	2912.13	3084.25	13519	2490.74	1804.25	8681.41	3782.96	2471.56	5181.07	2263.4	9497.32	2237.18	3117.97	2530.99
M942T282	[M-H]-	Soyasaponin i	0.543296	1.13038	0.717623	941.515	282.259	1.11783		C08983	Lipids and lipid-like molecules	Prenol lipids	Terpene glycosides	294.32	10	9	77218.9	24132.3	90550.6	52703.8	55349	24905.6	26018.6	23014.1	5685.97	32083.4	19899.2	20195.3	18307.6	15995.4	14559.5	44828.7	25134.8	19830.6	17164.5	19150.9	16014	39355.2	14520.5	22498.6	74916.9	9569.92	162310	39295.6	11988.1	73668.5	10243.2	44998.5	37163.8
M912T271	[M-H]-	Soyasaponin ii	0.498033	1.21274	0.540808	911.504	270.61	2.4386		C12081	Lipids and lipid-like molecules	Prenol lipids	Terpene glycosides	272.05	7	7	55211.5	27022.6	69783.3	29310.6	38160.1	20388.3	14682.2	16168.9	5051.35	26359.2	12971.7	36154.7	18760.8	12686.1	11078.3	26910.8	14864.1	14710.4	12450.5	16667.4	10435.5	22820.8	11760.3	14205.1	55736.9	7213.14	116682	24920.4	9076.81	67296	10596.6	25146.7	27661.9
M721T504	[M+Cl]-	Specnuezhenide	0.518467	1.99184	0.0685319	721.207	504.206	0.668533						523.664	10	10	5300.9	5050.48	21073.1	21348.5	4905.08	22304.8	9241.36	12079	1174.39	7589.48	4438.13	5399.79	892.851	3486.18	11458.7	8403.08	2733.09	12012.5	9522.11	8985.54	19512.3	8681.35	11256	2398.91	3687.42	1074.68	4189.44	31916.1	5092.08	9049.99	3132.45	5350.32	12358.5
M427T409	[M-H-C6H12O6]-	Spinosine	0.13466	1.15573	0.433224	427.11	409.082	0.0209907		C17834	Phenylpropanoids and polyketides	Flavonoids	Flavonoid glycosides	412.429	8	5	1661.91	1983.83	2210.84	5378.12	2638.54	5069.54	2842.59	4450.61	2558.12	3695.57	2256.74	2198.54	1728.51	2241.07	4641.06	2589.15	1929.41	2969.08	1189.11	1887.74	5149.35	1847.4	2456.4	2234.04	2481.75	1951.46	2220.08	5357.25	2403.47	3111.91	1279.87	2794.83	1652.24
M665T498	[M-H]-	Stachyose	1.61463	1.95485	0.317319	665.216	498.238	3.02886	HMDB0003553	C01613	Organic oxygen compounds	Organooxygen compounds	Carbohydrates and carbohydrate conjugates	513.151	10	10	49435.8	10056.8	16855	577912	23615.3	153116	32672.8	110535	22344.1	88044.9	49490.2	41769	11917.5	76053	122069	931933	83483.7	134824	40848	350983	76041.4	17610.6	89952.3	47713.8	84567.9	7146.51	17308.7	190465	40865	161740	46166.1	20144.2	135183
M527T103	[2M-H]-	Suberoylanilide hydroxamic acid	0.129199	0.907916	0.565939	527.305	102.7	4.7202	HMDB0015568					114.757	10	10	65723.9	106823	59387.8	116221	96742.2	115879	172151	215571	111044	210985	149277	276457	173505	101756	200628	126148	97948.4	90316	234220	124359	179856	161771	54183.1	105423	91830.3	158074	44339.9	108479	126701	167696	212111	117814	83875.7
M117T105	[M-H]-	Succinate	0.617673	1.30879	0.201666	117.019	104.704	3.1357	HMDB0000254	C00042	Organic acids and derivatives	Carboxylic acids and derivatives	Dicarboxylic acids and derivatives	117.087	10	9	68175.5	56481.6	18794	67013.4	17747.1	73525.4	73212.6	69058.4	9201.88	53307.8	37230.7	84514.3	30398.8	30978	51348.7	41996.9	48508	79112.9	64689.3	78622.6	57770.3	44282.9	68472.1	43312.2	35812	41548.8	14618.2	95395.3	57114.3	60974.4	18759.4	48653.3	50066.6
M98T79	[M-H]-	Succinimide	0.578777	0.90882	0.711662	98.0243	78.967	1.49176		C07273	Organoheterocyclic compounds	Pyrrolidines	Pyrrolidones	97.579	10	10	9705.9	10463.6	11050.5	52681.1	7218.31	68559	50410.8	57718.3	12238.3	57640.6	56348.2	31544.8	57298.5	48251.2	74991.3	60640.4	65456.8	59210	46865.2	25579.3	54689.6	25907.6	32808.7	51972.6	23982.7	28900.5	12054.4	54194.9	47616.3	44326.3	76396.8	36497.5	37494
M341T365	[M-H]-	Sucrose	2.98552	1.43782	0.315399	341.109	365.196	0.714149	HMDB0000258	C00089	Organic oxygen compounds	Organooxygen compounds	Carbohydrates and carbohydrate conjugates	369.341	9	10	2.00668e+06	925551	97072.7	2.07474e+06	1.44142e+06	416503	827170	2.7238e+06	402637	2.43861e+06	1.53195e+06	275571	546918	841838	1.66463e+06	2.07676e+06	776233	1.51443e+06	872760	1.13613e+06	856762	569291	452490	876505	1.31261e+06	1.55175e+06	654962	1.41256e+06	1.16835e+06	919756	803002	786318	785300
M172T92	[M-H]-	Sulfanilate	0.494502	0.920857	0.821237	172.007	92.329	2.52751			Benzenoids	Benzene and substituted derivatives	Benzenesulfonic acids and derivatives	109.364	10	9	18028.2	120801	13954.9	23924.9	17218.5	49988.5	34997.3	100997	16340.2	19207.5	79901.2	46192.9	80707.6	185141	168022	68949.7	160821	107199	63242.3	41547.8	116427	38169.4	919.342	40756.2	41132.9	14591.7	8621.13	59847.2	35220.8	72598.1	78957.1	48864.8	167969
M139T382	[M-H]-	Sulfoacetic acid	0.166397	1.05062	0.918971	138.97	381.744	0.948386		C14179	Organic acids and derivatives	Organic sulfonic acids and derivatives	Organosulfonic acids and derivatives	384.29	10	10	61967	3325.03	15453.8	4773.01	6138.53	1010.67	2137.54	1974.89	3878.77	1989.55	1449.5	3918.73	941.956	1801.8	2589.3	981.435	1521.18	1977.87	1610.67	2959.41	1650.98	1747.99	1139.6	1071.91	3276.49	917.806	8681.18	1987.43	1503.68	2425.25	1172.58	6853.55	1095.1
M574T32_2	[M-H]-	Sulfobacin b	12.1371	1.00466	0.978255	574.449	31.904	2.57372			Lipids and lipid-like molecules	Fatty Acyls	Fatty amides	34.674	8	8	1.10588e+07	2.61281e+07	1.1843e+07	1.69852e+07	1.60556e+07	9.77247e+06	2.23189e+07	1.32364e+07	2.52826e+07	1.3917e+07	1.13949e+07	2.13324e+07	2.33326e+07	8.70666e+06	9.41312e+06	1.72205e+07	1.05019e+07	1.25798e+07	1.31311e+07	8.40816e+06	1.63435e+07	1.14209e+07	1.20583e+07	1.16837e+07	7.82123e+06	2.33792e+07	1.18607e+07	1.07829e+07	1.54188e+07	1.26891e+07	1.162e+07	1.16505e+07	1.10978e+07
M665T231	[M-H]-	Syrosingopine	0.077854	1.11064	0.527916	665.262	231.466	1.43871						235.135	10	9	3542.3	16415.3	13832.2	11521.1	20009	20138.8	10940.9	14777.6	5419.17	17120.7	14772.3	21853.3	12169.9	15329.6	14236.3	16278.9	10753.5	15283.6	7487.59	14820.6	15238.5	15530.5	18369.5	15704.4	19873.7	12682.7	5120.59	9897.44	13933.3	11570.6	23573	19370.8	10278.8
M124T297_2	[M-H]-	Taurine	4.4157	0.551302	0.16245	124.007	296.684	1.41922	HMDB0000251	C00245	Organic acids and derivatives	Organic sulfonic acids and derivatives	Organosulfonic acids and derivatives	300.815	10	10	2.64771e+06	155456	884610	951390	771095	496539	1.2441e+06	634968	93504.6	892150	378810	2.32507e+06	67765.2	1.55949e+06	3.0247e+06	489222	358440	429139	316545	3.68366e+06	489580	343573	2.82714e+06	130143	227696	46203.1	126469	1.02723e+06	142693	326396	425476	1.47024e+06	632242
M498T147	[M-H]-	Taurochenodeoxycholate	3.54961	0.802782	0.540689	498.289	147.405	1.2265	HMDB0000951	C05465	Lipids and lipid-like molecules	Steroids and steroid derivatives	Bile acids, alcohols and derivatives	170.235	10	10	434027	1.12344e+06	304007	2.73308e+06	318948	2.18499e+06	1.99621e+06	3.90086e+06	542297	2.13878e+06	3.30436e+06	4.83336e+06	1.13226e+06	2.55614e+06	1.16327e+06	2.86732e+06	2.83643e+06	2.38534e+06	3.62036e+06	1.40855e+06	7.87585e+06	1.90869e+06	2.12679e+06	1.77471e+06	1.77469e+06	702278	2.27716e+06	4.26872e+06	2.83835e+06	2.50508e+06	3.52256e+06	5.16421e+06	1.79892e+06
M514T178_2	[M-H]-	Taurocholate	2.9129	0.670133	0.152828	514.285	177.811	1.11765	HMDB0000036	C05122	Lipids and lipid-like molecules	Steroids and steroid derivatives	Bile acids, alcohols and derivatives	182.192	10	10	679242	771093	401904	1.60534e+06	468317	1.467e+06	1.38284e+06	1.09473e+06	677927	1.39918e+06	2.56174e+06	2.71223e+06	590600	1.43971e+06	1.36025e+06	2.71799e+06	983598	1.8249e+06	3.17696e+06	1.74092e+06	3.48866e+06	1.41441e+06	3.0703e+06	1.35883e+06	1.1934e+06	395990	1.61151e+06	1.36443e+06	2.49015e+06	1.54421e+06	2.24691e+06	2.3065e+06	1.01099e+06
M281T109	[M-2H]2-	Taurolithocholic acid sulfate	0.372044	0.889678	0.860891	280.622	108.639	7.39195	HMDB0002580	C03642	Lipids and lipid-like molecules	Steroids and steroid derivatives	Bile acids, alcohols and derivatives	126.798	8	10	4943.32	158396	7153.13	11543	14784.1	18360.1	59194.9	15239.7	1347.7	38670.3	43364.8	543069	708.69	6857.64	24696.9	16875.6	8060.36	8089.94	59476.2	18559.8	55952.6	15104.4	3684.89	12115.6	6605.84	6983.98	14100.1	10428.8	15192.5	41125.6	32090.5	92276.3	11079.3
M469T160	[M-H-CO2]-	Telmisartan	1.46427	0.568954	0.149314	469.228	160.436	0.969813	HMDB0015101	C07710	Benzenoids	Benzene and substituted derivatives	Biphenyls and derivatives	194.953	8	8	12839.2	311154	21282.1	131121	201527	87943.3	180331	20828.3	199688	512242	159944	260983	242580	13085.1	44867.5	350068	10767.3	13806.3	350201	16992.5	279870	829023	22706.5	70143.4	8614.49	63426.9	10710.4	258036	31521.8	391520	606025	132797	21587.9
M286T50	[M-H]-	Tenofovir	0.192206	1.12577	0.547184	286.075	49.788	2.34359	HMDB0014445	C17407	Organoheterocyclic compounds	Imidazopyrimidines	Purines and purine derivatives	51.2	7	6	26186.8	32955.7	34283.4	33419.6	35839.8	38721.3	39029.9	42274.9	13263.4	53907.2	44507.5	42289.7	53571.5	58298.6	33273.3	34691	71680.5	43688.2	46702	19988.6	55975.2	78136.6	22614.6	38419.9	44107.6	65860.9	30617.8	33040.6	56806.5	47077.2	49285.1	45809.5	39670.5
M1078T171	[M-H]-	Terrestrosin k	0.119173	1.11571	0.674396	1077.53	170.514	1.49844			Lipids and lipid-like molecules	Steroids and steroid derivatives	Steroidal glycosides	173.556	7	4	1514.06	1727.68	842.391	4394.36	1308.14	1588.52	3336.44	4925.15	2422.01	3743.36	2459.01	3656.69	4830.46	1697.09	1970.01	2580.46	3137.65	4776.56	5817.13	3154.72	6827.01	3091.21	1838.48	2766.34	2231.3	7035.47	1418.52	3732.9	4627.24	5005.07	5395.8	1256.11	2731.56
M287T137	[M-H]-	Testosterone	0.367296	0.908789	0.795892	287.187	136.648	4.3815	HMDB0000234	C00535	Lipids and lipid-like molecules	Steroids and steroid derivatives	Androstane steroids	144.5	4	4	12069.6	30643.8	85036.4	5711.89	71565.7	5517.8	82910	26695	54597.3	54862.3	26028.1	38323.7	9256.31	8190.01	48435.8	28412.9	9050.49	61070.9	22744	9044.91	4645.16	33048.7	39186.6	8067.76	71162.9	13713.5	3463.62	9405.09	68550.5	9495.35	53541.5	12077.7	44853.9
M257T243	[M-H]-	Tetradecanedioic acid	0.337478	0.79962	0.298376	257.176	243.423	2.88253	HMDB0000872		Lipids and lipid-like molecules	Fatty Acyls	Fatty acids and conjugates	245.545	10	10	19570.3	15015.5	14347.5	11191.8	18027.1	11667.7	9364.98	12686.5	35323.2	10824.6	21380.5	15565.1	9782.3	21661.1	19807.7	8566.59	13498.1	14992	11722.5	26705.1	10810.6	18169.5	14936.4	8211.58	30513.9	7529.55	19949.2	8784.32	6257.35	10854.3	13820	23011.1	10159.8
M351T311	[M-H]-	Tetrahydroalstonine	0.187927	1.09891	0.833313	351.147	310.572	2.87218		C11682				316.515	9	9	4676.17	6769.46	5748.58	42741.6	2524.41	2937.84	6584.23	9546.91	11748.5	5323.2	4376.58	12476.5	9584.19	6256.77	22621.8	4504.65	4659.87	6280.95	6963.06	5731.14	7801	1680.48	4326.12	6567.78	5419.76	10405.5	3105.24	44550.8	10578.7	8046.78	12337.4	6038.1	2167.07
M349T67_2	[M-H]-	Tetrahydrocorticosterone	0.96601	0.802616	0.362226	349.238	66.954	0.912454	HMDB0000268	C05476	Lipids and lipid-like molecules	Steroids and steroid derivatives	Hydroxysteroids	71.05	10	10	135513	210057	194042	56068.2	363196	102413	66075.5	75817.9	282987	121506	197504	182429	189014	160703	105625	94742.8	115820	114320	128535	247710	99622.7	102138	60586.1	76798.9	154700	110393	203320	71761.5	55815.6	82327.2	139668	136828	87993.5
M621T266	[M-H]-	Thalsimidine	0.152235	0.778381	0.225116	621.283	265.695	0.186952						267.081	10	10	6810.81	8441.9	6905.06	5690.46	9622.89	6072.67	13779.6	5663.82	11123.8	5916.06	6073.64	14544.8	5575.58	7908.9	14391.2	5837.73	3656.25	4088.31	2811.84	7087.57	4929.18	3963.48	7581.47	5413.09	3504.38	3539.7	6145.41	4256.32	4336.63	5222.76	4486.63	7036.27	2720.33
M185T304_1	[M-H-C2H7NO3S]-	Thiosultap	0.135664	0.785636	0.66339	184.958	304.217	4.48013			Organic acids and derivatives	Organic thiosulfuric acids and derivatives	S-alkyl thiosulfates	310.025	10	10	101114	2438.03	26730.4	2183.34	14482.9	2303.67	5311.8	2289.29	12296.4	2811.21	3873.94	2555.65	1970.36	5177.23	7254.63	2664.48	3335.58	2800.83	1251.5	5453.74	2256.68	2173.12	7283.49	1872.16	4075.2	832.128	15002	1941.88	754.377	2724.07	2002.98	2950.42	2923.71
M247T401	[M-H]-	Thr-Glu	0.0207668	0.763219	0.453956	247.092	400.685	7.69055			Organic acids and derivatives	Carboxylic acids and derivatives	Amino acids, peptides, and analogues	408.019	5	9	15238.6	1071.98	8308.88	3205.3	5146.51	3543.46	1144.73	720.355	2825.88	1458.38	2092.47	2959.39	1884.62	4796.42	3420.4	2081.38	959.274	1627.75	2324.11	4669.97	2609.67	2139.74	2511.75	2279.4	10369.3	1227.26	4043.27	3467.9	824.594	1474.35	2560.89	4829.26	2149.07
M739T157	[2M-H]-	Thromboxane b2	0.130293	0.922477	0.799241	739.442	156.727	1.21078	HMDB0003252	C05963	Lipids and lipid-like molecules	Fatty Acyls	Eicosanoids	170.106	8	8	9047.49	8569.85	1571.41	15126.7	18876.5	11214.8	17281.1	35064.7	12660.9	15045.9	18552.8	12080.8	36471.6	6109.94	15539.2	33331.1	12214	9497.62	11691.1	10616.4	6119.39	20152.5	14582.7	25460.6	25335.1	45711.5	10619.1	14353	19626.8	14094.3	8031.07	9139.73	9112.69
M219T320	[M-H]-	Thr-Thr	0.351071	0.95651	0.880125	219.098	319.873	0.164136			Organic acids and derivatives	Carboxylic acids and derivatives	Amino acids, peptides, and analogues	325.174	10	10	5488.1	3576.39	13676.6	16961.6	11117.1	37371.3	7400.79	21786.9	3137.14	14212.2	11228.9	5517.4	1949.79	13727.5	10230.1	12224.5	17962.6	21203.7	12045	13718.7	14496.9	17082.8	12186.6	8044.09	39279.2	6022.17	4525.66	40089.7	6627.75	20523.2	13037.5	29627.5	12282.8
M330T223	[M-H]-	Thr-Val-Leu	0.196904	0.901748	0.454847	330.203	223.133	0.0408755			Organic acids and derivatives	Carboxylic acids and derivatives	Amino acids, peptides, and analogues	229.762	10	10	21015.3	63252.7	61271.2	73303.8	110440	89866.8	47473.5	62341.5	49332.8	94450	83119	67398.5	49186.7	58341.7	70005.2	32365	60849.3	90410.8	49011.3	106145	61264.7	73441.2	47254.1	36046.7	202906	45198.6	42321.1	70586.3	39806.5	75677.2	41191.5	94301	48014.5
M125T75	[M-H]-	Thymine	1.57386	1.31344	0.500507	125.035	74.712	1.91457	HMDB0000262	C00178	Organoheterocyclic compounds	Diazines	Pyrimidines and pyrimidine derivatives	76.021	10	10	1.0703e+06	267764	490430	204445	267979	98282.2	199035	233894	368130	137932	234020	238362	185785	209985	290988	124126	136361	103032	185558	126897	169309	164785	129921	139202	63462.3	98501.5	397967	122884	142344	106117	162218	248057	166941
M311T29	[M-H]-	Thymol-beta-d-glucoside	3.28356	0.810056	0.601053	311.169	28.528	0.36617			Lipids and lipid-like molecules	Prenol lipids	Terpene glycosides	30.83	10	10	655421	921490	861601	1.16434e+06	921568	2.96323e+06	1.0726e+06	1.73053e+06	1.00358e+06	1.72872e+06	1.61906e+06	1.47706e+06	2.19544e+06	7.77387e+06	1.18622e+06	1.13757e+06	1.5919e+06	2.57223e+06	1.4005e+06	1.04709e+06	1.25514e+06	1.45342e+06	987566	2.0175e+06	1.90555e+06	1.37442e+06	2.20807e+06	1.75519e+06	1.49291e+06	1.12745e+06	1.5719e+06	1.13331e+06	1.82535e+06
M475T219	[M-2H]2-	Thyroxine 4'-o-.beta.-d-glucuronide	0.168123	0.695167	0.149288	475.342	219.386	6.61399			Organic acids and derivatives	Carboxylic acids and derivatives	Amino acids, peptides, and analogues	224.616	9	8	4973.88	6132.19	3379.17	9121.94	16710.3	3953.17	3416.69	4586.03	10594.9	9123.8	3931.4	13343.9	13606.5	4175.7	9304.22	2576.65	3432.83	3188.39	2756.69	3225.36	5123.69	3032.71	5033.45	3344.17	5131.28	5977.98	3813.22	1761.05	3805.67	2540.72	7195.67	4229.74	7262.01
M350T53	[M-H-C8H11NO3]-	Trans-carboxyglimepiride	1.686	0.312858	0.184953	350.107	53.305	0.201712			Benzenoids	Benzene and substituted derivatives	Benzenesulfonamides	64.251	10	8	13837.3	27240	18327.2	91233.2	22191.1	38130.3	156048	49923.5	25279.2	62969.4	288893	1.41278e+06	8134.66	105228	60602	39938.7	51724.9	29633.3	498171	44643.2	122325	74066.9	50134.8	16565.4	52082.8	16782.4	11946.4	20379.4	38418	153454	154174	676072	34506.4
M287T239	[M-H]-	Trans-dehydroandrosterone	1.3738	0.888227	0.482725	287.187	238.735	1.34622	HMDB0000077	C01227	Lipids and lipid-like molecules	Steroids and steroid derivatives	Androstane steroids	241.685	10	10	377325	362422	404709	289564	539480	473893	329050	347577	537283	542989	416830	545090	459009	576140	620182	429271	386848	541945	417867	727861	422599	571689	594064	440441	764762	601539	527115	270536	475845	304966	804759	589665	320750
M193T160	[M-H]-	Trans-ferulic acid	2.1052	1.40002	0.12217	193.05	159.51	1.04263	HMDB0000954	C01494	Phenylpropanoids and polyketides	Cinnamic acids and derivatives	Hydroxycinnamic acids and derivatives	164.104	10	10	84159.5	100564	294229	409542	132360	306005	230030	241107	76278.1	131082	235032	212523	34308.4	212028	233611	166541	239560	184270	138575	158457	255034	119565	211922	149620	214527	62850.3	94124.4	263498	90447.7	156560	95329.8	137697	212765
M527T304	[M-H]-	Tremulacin	0.508012	1.33559	0.367072	527.143	303.688	1.78866		C09973	Organic oxygen compounds	Organooxygen compounds	Carbohydrates and carbohydrate conjugates	307.452	9	6	3887.33	5336.01	1523.58	29695.3	6775.96	23133.2	9592.7	33533	6947.65	23916.3	5100.4	19758.9	5390.58	22055.1	9375.26	10327.8	16641	45998.6	6010.73	46761.6	9412.44	5718.87	33993.2	15840.4	17842.1	5337.88	7522.99	25424.6	11814.1	7101.17	10633.1	7503.96	10723.8
M203T261	[M-H]-	Tryptophan	0.604017	0.861052	0.642854	203.083	261.281	0.222357	HMDB0000929	C00078	Organoheterocyclic compounds	Indoles and derivatives	Indolyl carboxylic acids and derivatives	267.836	10	10	19329.7	80167.1	223060	177473	281948	216124	38744.1	247291	28764.3	139229	73362.6	59986.8	6251.04	149539	50398.5	69132.5	39847.2	207817	195780	90660.8	81755.4	162424	37760	12432	306652	7952.99	72228.4	388463	21393.6	189075	10586.1	305818	55805.4
M251T105	[M-H]-	Tyr-Ala	0.876637	0.735862	0.351741	251.094	105.277	1.70924			Organic acids and derivatives	Carboxylic acids and derivatives	Amino acids, peptides, and analogues	115.647	9	2	22012	25116.1	24463.2	82131.4	21922.7	23988.3	23143.9	22561.3	22024	20769.5	21864.6	23314.7	50807.4	24404.3	170851	20580.6	88807.2	32111.6	16491	10274.7	25125.8	30957.9	17204.7	28960.6	80912.6	60722.6	25410.1	11612.6	19754.4	35167.7	87417.8	80032.9	25473.1
M311T711	[M-H]-	Tyr-Met	0.512595	1.01663	0.962356	311.116	711.409	1.04155			Organic acids and derivatives	Carboxylic acids and derivatives	Amino acids, peptides, and analogues	719.039	10	10	100544	123641	103959	69065.3	342437	197609	74704	73048.5	59043.1	69844.8	89163.9	106587	66269.9	58154.9	94771.2	113399	69611.5	146616	266126	103195	97413.9	102728	41055.7	46378.6	84456	62579.5	86185.5	69260	43633.3	63061.1	52314.1	17083.9	156011
M506T369	[M-H]-	Tyr-Tyr-Tyr	0.203989	1.06819	0.81333	506.198	368.836	1.44354			Organic acids and derivatives	Carboxylic acids and derivatives	Amino acids, peptides, and analogues	372.781	10	9	5138.79	9692.92	8150.48	14416.3	4979.51	4958.49	4972.12	5025.81	8968.68	19031.4	6533.88	2983.09	1986.64	9923	11666.5	3062.97	10764.8	2517.96	14760.9	2591.62	1704.16	26174.3	3088.49	4435.29	10849.5	3947.34	4901.15	10496.7	4793.92	3838.8	1952.06	4926.46	6769.07
M111T86_2	[M-H]-	Uracil	1.51183	1.07515	0.785256	111.02	85.844	1.11397	HMDB0000300	C00106	Organoheterocyclic compounds	Diazines	Pyrimidines and pyrimidine derivatives	99.237	10	10	2.38066e+06	1.16857e+06	788359	566435	1.62036e+06	533318	751296	940160	1.1979e+06	736870	989707	983981	724001	1.12931e+06	1.14703e+06	498213	583353	384483	703817	770444	519693	499809	497402	405986	334215	347546	340282	272619	473952	302409	838201	746335	686500
M386T36_1	[M-H]-	Urapidil	0.951974	1.05929	0.928891	386.237	36.409	4.06423			Organoheterocyclic compounds	Diazinanes	Piperazines	56.035	9	9	836793	110304	1.07166e+06	90412.1	115316	116135	226241	87895.5	98825.7	137981	81482.4	416800	42573.8	101701	88013.4	85629.8	90972.9	88340.8	119319	94329.6	111521	92631.4	162824	73590.9	59881.6	8937.5	572600	101213	75277.4	118483	156279	403878	80400.9
M167T327	[M-H]-	Uric acid	0.0697449	0.911178	0.649714	167.021	327.071	1.21851	HMDB0000289	C00366	Organoheterocyclic compounds	Imidazopyrimidines	Purines and purine derivatives	329.017	8	7	5889.95	2591.94	1926.87	1403.02	3375.81	3305.6	1257.65	2628.15	3985.39	1496.31	2752.22	2976.29	2783.95	1239.93	3869.11	1041.71	1429.15	861.65	1390.35	1276.62	1618.79	2152.85	2169.94	652.755	2736.32	789.007	2614.52	3043.5	2367.59	1056.16	3094.66	3476.11	2328.35
M137T291	[M-H]-	Urocanate	1.25983	1.30063	0.555755	137.035	291.184	2.08012	HMDB0000301	C00785	Organoheterocyclic compounds	Azoles	Imidazoles	294.705	10	10	34503	183413	362733	44739.5	213712	25809.8	40573.9	80278.8	101294	28577.8	36406.4	33393.3	24013.8	41073.3	62680.8	48867.7	19080.4	25434.3	20619	80776.2	53796.5	79948.6	44684.5	12922.4	51366.1	58259.8	99583.5	24548.4	37773.9	46639.1	15334.2	55051.3	26077
M347T34	[M-H]-	Urushiol ii	1.22264	1.19941	0.174235	347.295	33.7895	3.1083			Benzenoids	Phenols	Benzenediols	35.336	10	9	122386	157815	225540	134815	206803	131027	85035.7	129079	77794.8	161550	104427	91242	86663.5	99863.9	79259.9	95403.1	148495	130099	84056.3	120112	123246	171628	74768.5	133467	212659	95904.4	236166	158099	82588.7	132053	107300	116347	175304
M233T31	[M-H]-	Valerenic acid	1.40874	1.04345	0.837658	233.155	31.303	0.283432		C09743	Lipids and lipid-like molecules	Prenol lipids	Sesquiterpenoids	43.141	9	8	255893	359939	357352	426671	354899	1.0866e+06	463112	861660	712062	715348	435884	419145	378305	419998	280618	422965	824980	772757	706178	279759	403248	342462	868311	880310	392234	391965	431575	774001	513725	728689	412505	671340	424714
M116T306	[M-H]-	Valine	1.18925	0.909299	0.779436	116.072	306.171	6.23279	HMDB0000883	C00183	Organic acids and derivatives	Carboxylic acids and derivatives	Amino acids, peptides, and analogues	317.95	10	10	122380	428007	1.17682e+06	379054	1.37987e+06	654816	139537	730484	209442	309357	169834	167840	32897.5	965886	283799	165845	236529	701371	407460	726036	167795	551457	196909	39050.1	932423	111821	263162	590532	40684	303111	116675	675787	143833
M338T168	[M-H]-	Violacein	0.270056	0.919128	0.565363	338.197	167.771	0.364493		C21136	Lipids and lipid-like molecules	Prenol lipids	Sesquiterpenoids	174.383	10	8	15184.4	5927.44	18851.3	26178.3	17073.2	23641.2	21371.9	20488.7	14231.8	21280.8	28996.2	15687.3	16005.2	19291.6	24330.8	11773.1	11678	23572.1	10377.7	16370.2	17073.3	25032.3	13962.5	7655.04	30725.6	13077.8	19412.6	25005.8	9870.86	24046.8	23273.5	27593.6	26613.1
M524T36_1	[M-H]-	Virginiamycin component b	0.355395	0.76402	0.347158	524.234	36.2815	1.71101						49.749	10	7	21594.6	48597.6	29280.3	20772.3	26855.4	38273.9	38034.7	15259	14248.2	47873.9	52122.7	82279.3	26280.3	26872.1	24697.7	19682.2	19812.5	20345	135030	24337.7	43577.3	22212.1	12274.8	25310.6	20483.2	17255.8	10470.5	26981.5	27723.2	37719.3	73928.9	79395.8	15114.1
M351T406	[2M-H]-	Vitamin c	0.199077	1.3532	0.574499	351.057	405.805	2.01795	HMDB0000044	C00072	Organoheterocyclic compounds	Dihydrofurans	Furanones	409.499	7	7	31577	1340.91	30464.7	1283.7	7441.78	3128.02	3095.57	3268.11	4093.08	1882.29	1251.82	1264.29	3992.37	2117.31	11812.7	950.93	1189.59	2808.41	3112.97	5727.61	3360.33	602.106	1733.68	2988.1	2737.64	3459.41	1916.35	1165.98	3505.55	2892.88	4554.08	1826.58	2915.42
M268T345	[M-H-CH3]-	Wogonin	0.0645669	0.852658	0.59612	268.05	345.045	0.622706		C10197	Phenylpropanoids and polyketides	Flavonoids	O-methylated flavonoids	349.992	9	9	6792.13	4087.65	7282.43	3953.38	7135.15	1740.01	3570.47	1965.03	4477.25	4649.45	3289.64	4192	847.555	2019.62	9621.52	1116.98	2402.23	2895.37	3061.03	3668.57	1764.36	3943.68	2626.29	1767.88	5296.93	2813.08	4274.09	2411.1	2226.77	2565.28	2089.94	4787.22	1610.06
M160T103	[M-H-CO2]-	Xanthurenic acid	1.94958	0.903557	0.768069	160.04	102.758	1.64426	HMDB0000881	C02470	Organoheterocyclic compounds	Quinolines and derivatives	Quinoline carboxylic acids	107.226	10	4	159054	94164.3	134770	195052	134202	292248	359954	500249	153870	333499	407209	204586	140916	584996	896202	270957	406601	240850	178178	537532	516365	171434	435495	224339	165708	121600	95873.1	226882	241231	132627	285212	193204	267511
M445T38_1	[M-H]-	(z)-2,6-dimethyl-7-(4-methyl-5-oxooxolan-2-yl)-3-[[3,4,5-trihydroxy-6-(hydroxymethyl)oxan-2-yl]oxymethyl]hept-5-enoic acid	0.83369	1.17241	0.187737	445.187	37.715	2.75209						38.966	10	10	114393	173753	101398	202711	130241	186884	154557	184227	139473	168808	130738	88922.7	225215	192483	151349	185915	172437	163599	167613	169867	170944	180635	119950	313953	231198	307482	242364	208003	226108	128850	285898	140443	156101
M379T67	[M-H]-	(z)-3-(4-hydroxyphenyl)-n-[4-[[(e)-3-(4-hydroxyphenyl)prop-2-enoyl]amino]butyl]prop-2-enamide	0.365686	1.07732	0.653771	379.17	66.849	4.93481			Phenylpropanoids and polyketides	Cinnamic acids and derivatives	Hydroxycinnamic acids and derivatives	86.917	7	6	23298.9	48197.4	44817.4	70792.8	54465.4	50874.6	47981	14392.4	32238.4	31228.5	65275.7	56716.4	61403.4	40376.9	10598.3	17955.4	38629.5	123809	38111.2	72230.3	84434.5	116976	54108.4	26225.1	53432.2	62971.8	57864.2	37752.9	70313.8	15104.6	80865.4	52475.9	36052.4
M317T35	[M-H]-	Zearalenone	0.719024	0.95129	0.860588	317.141	35.357	3.83916		C09981	Phenylpropanoids and polyketides	Macrolides and analogues	Zearalenones	49.843	10	10	69335.5	69679.9	69581.1	203427	107888	166177	163782	339017	28327.6	243867	123917	289127	320797	95762.3	66075.4	219832	246261	118556	239736	98005.8	249075	178485	80073.2	171945	99282.8	131936	106663	172666	254478	131044	331310	207026	249265
M265T26	[M-H]-	Zinniol	3.59382	1.17647	0.526535	265.148	26.334	0.183145		C10840	Benzenoids	Benzene and substituted derivatives	Benzyl alcohols	28.171	10	10	1.0006e+06	774428	1.02014e+06	1.49277e+06	965250	2.75886e+06	1.32927e+06	2.85516e+06	1.06013e+06	2.25974e+06	1.2801e+06	2.41283e+06	1.53307e+06	4.12015e+06	891103	1.27441e+06	1.5966e+06	2.14757e+06	1.41911e+06	1.38025e+06	1.36205e+06	1.42134e+06	1.11196e+06	2.96487e+06	1.98288e+06	1.03103e+06	1.82084e+06	1.21083e+06	1.12173e+06	1.2563e+06	1.38805e+06	1.11693e+06	2.2438e+06
[truncated: 26 more columns]

## Sheet: OXA_vs_C-2
ID	adduct	Name	VIP	Fold change	p-value	m/z	rt(s)	PPM	HMDB	KEGG	SuperClass	Class	SubClass	rtmax	ACBP.OXA	C.2	P-21-4	AC-14-4	AC-15-4	AC-17-4	C-4-2	AC-12-4	AO-43-4	AC-13-4	C-1-2	P-24-4	AO-45-4	AO-47-4	C-9-2	C-8-2	C-7-2	AO-50-4	AC-20-4	AO-49-4	AO-44-4	P-29-4	O-39-4	AO-46-4	AO-42-4	O-38-4	O-40-4	AC-18-4	P-23-4	P-27-4	O-36-4	AO-48-4	O-34-4	C-3-2	AC-11-4
M271T43	[M-H]-	Sempervirine	1.65498	2.26816	6.36346e-05	271.108	42.502	2.61276		C09240	Organoheterocyclic compounds	Indoles and derivatives	Pyridoindoles	47.833	10	9	48796.6	43076.2	48013.8	70430.2	43363.6	112277	89142.6	63249.8	44715.5	118236	132258	38025.1	84389.9	33460.3	39033.3	36246	144954	88067.6	86215.6	65399.6	91337.9	52665.3	67905.2	160419	63352.2	53735.3	115179	75840.4	123842	68209.3	136910	43109.8	118582
M174T391	[M-H]-	N-acetyl-l-aspartic acid	1.83611	0.249902	0.00196647	174.041	390.857	3.59135	HMDB0000812	C01042	Organic acids and derivatives	Carboxylic acids and derivatives	Amino acids, peptides, and analogues	393.411	10	10	173620	40986.2	503779	134024	175155	16893.1	31039.6	67741.4	148096	40839.4	50464.7	71881.8	12616.7	88902.6	99118.1	15427	15776.4	25780.2	18777.9	103117	33192.9	20281	15056.1	9066.08	46818.6	11047.4	125827	68198.3	31986	44889.5	11985.4	149967	15813.8
M241T38_1	[M-H]-	Equol	3.5591	1.44594	0.00537913	241.087	38.004	0.521806	HMDB0130495		Phenylpropanoids and polyketides	Isoflavonoids	Isoflavans	38.973	8	7	189180	618286	145256	566942	342670	439377	552630	371071	234502	437211	737065	608445	483423	531817	372750	542900	806816	568762	987625	280160	1.00645e+06	1.41729e+06	438274	711987	576654	599192	373129	773350	704076	629280	916493	734864	569989
M144T38	[M-H]-	Indole-3-carboxaldehyde	2.82649	0.393769	0.00726874	144.045	38.313	2.467	HMDB0029737	C08493	Organoheterocyclic compounds	Indoles and derivatives	Indoles	39.646	10	10	465525	268384	678253	240591	436362	209026	153011	203392	390849	148298	192208	187582	86710.6	251102	281437	142284	124698	174085	150527	148397	171349	149791	187066	90679.5	148786	49151.7	575048	201872	110970	156353	104774	403085	194496
M403T105	[M-H]-	1-o-(9z-octadecenyl)-sn-glycero-2,3-cyclic-phosphate	4.02447	0.353297	0.00907363	403.249	104.669	0.865282						112.976	10	10	1.65359e+06	231954	784094	155439	1.14672e+06	101150	261557	256249	637262	267851	120675	448123	222381	414258	771485	90884.7	88929.3	211443	103794	770149	220976	136335	403028	102484	90051.3	97207.2	1.36503e+06	81699.8	107929	86337.2	229222	271706	105011
M190T201	[M-H]-	N-acetyl-l-methionine	1.22852	0.544962	0.00911952	190.054	200.71	5.98541	HMDB0011745	C02712	Organic acids and derivatives	Carboxylic acids and derivatives	Amino acids, peptides, and analogues	206.487	10	9	36006.6	71751.7	694150	128487	126262	97691.5	63257.3	101448	95031.6	54247.6	122190	64193	26567.7	129941	123340	90190.1	62936.6	67241.4	66206.8	98737.7	98881.6	66759.2	78052.3	37203.6	122289	19460.4	124714	133763	788.404	97127.3	35853.7	121965	80531
M218T275	[M-H]-	Pantothenate	6.47818	0.279496	0.00973062	218.104	274.675	0.4982	HMDB0000210	C00864	Organic oxygen compounds	Organooxygen compounds	Alcohols and polyols	275.95	10	10	3.28084e+06	331884	1.82713e+06	336520	1.36354e+06	227525	537231	601467	3.1352e+06	698205	771772	535417	344866	1.37403e+06	1.96345e+06	397626	360896	304353	444330	1.05115e+06	336096	665430	766974	253414	181824	160696	1.37366e+06	255286	223241	258762	440402	650211	267827
M445T38_1	[M-H]-	(z)-2,6-dimethyl-7-(4-methyl-5-oxooxolan-2-yl)-3-[[3,4,5-trihydroxy-6-(hydroxymethyl)oxan-2-yl]oxymethyl]hept-5-enoic acid	1.86211	1.33486	0.0117812	445.187	37.715	2.75209						38.966	10	10	114393	173753	101398	202711	130241	186884	154557	184227	139473	168808	130738	88922.7	225215	192483	151349	185915	172437	163599	167613	169867	170944	180635	119950	313953	231198	307482	242364	208003	226108	128850	285898	140443	156101
M116T285	[M-H]-	Guanidoacetic acid	1.31758	0.270573	0.0139319	116.035	285.432	4.7818	HMDB0000128	C00581	Organic acids and derivatives	Carboxylic acids and derivatives	Amino acids, peptides, and analogues	288.326	7	8	13039.2	85344.6	196250	37826.7	115847	9056.24	39405.6	20465.7	60252.8	25210	53704.9	48328.4	22357.6	13588.1	102112	13533.5	11085.6	8781.95	10540.9	21363.2	15926.3	9260.07	15765.5	11771.4	8665.75	5985.8	85794.9	19723.5	13330.2	137893	6623.08	22778	37276.1
M188T385	[M-H]-	N-acetyl-l-glutamate	3.05448	0.20733	0.0148623	188.056	384.593	1.99907	HMDB0001138	C00624	Organic acids and derivatives	Carboxylic acids and derivatives	Amino acids, peptides, and analogues	386.95	10	10	554800	267737	835001	94634.3	490828	33768.6	60910.9	75527.7	560164	53383.7	105833	127871	49142.8	216344	219127	30553.8	41031.4	47004.9	24768.6	173383	46399.2	31354.9	44416.8	17587.3	114820	33989.7	496315	40573.8	50477.9	81087.5	29856.6	116419	48968
M91T135	[M-H]-	Glycerol	1.08889	0.538692	0.0172326	91.0549	134.822	0.617154	HMDB0000131	C00116	Organic oxygen compounds	Organooxygen compounds	Carbohydrates and carbohydrate conjugates	154.341	10	10	54844.3	46432.9	171788	24086.2	94590.6	44859.7	35418	41323.2	131148	22664.9	127389	31672.1	43081.4	100192	82933.3	41463.9	40687.2	61845.2	27471.3	147696	28772.7	42151.9	34658	9545.13	87967.7	27459.6	156553	35391.8	20399.8	46525.5	59106.9	57987.9	40412.1
M343T207	[M-H]-	Fa 18:2+4o	1.53713	0.466739	0.0178596	343.212	206.945	1.20144			Lipids and lipid-like molecules	Fatty Acyls	Fatty acids and conjugates	215.137	9	10	214131	147402	138374	267646	219649	449200	144337	218762	161672	178520	186927	180431	177371	781243	462603	185138	209076	241405	171439	251985	188367	171432	183151	144852	324160	173305	198570	284606	153692	191002	204492	623679	392193
M187T313	[M-H]-	N-acetylglutamine	2.47679	0.271477	0.0189446	187.072	312.798	7.59701	HMDB0006029					318.844	10	10	241536	125423	2.31419e+06	273856	160815	69443.9	100069	241121	407523	57945.6	63406.2	87466.9	51608.7	86589.3	244619	114778	62358.6	91610.8	30773.5	164556	78603	93385.3	155479	43624.2	71085.4	40884.3	1.23715e+06	125556	70808.9	83098.5	28800.7	135067	106616
M206T179	[M-H]-	N-acetyl-l-phenylalanine	2.32623	0.278565	0.0191692	206.082	179.405	5.40494	HMDB0000512	C03519	Organic acids and derivatives	Carboxylic acids and derivatives	Amino acids, peptides, and analogues	184.299	10	10	47694.2	79601.4	1.46018e+06	124551	367160	117816	80628.7	171112	189879	74308.4	73457	77414.1	13797.5	238503	110776	69556.7	45766.5	137333	112141	373730	47177	104261	99504	19678.5	198454	17834.1	364442	102192	16492.1	71595.3	22133.1	158786	45409
M144T217	[M-H]-	N-isobutyrylglycine	2.26309	0.18953	0.0193124	144.066	217.094	0.281393	HMDB0000730		Organic acids and derivatives	Carboxylic acids and derivatives	Amino acids, peptides, and analogues	236.465	10	10	30724.6	36271.7	268447	65853	151351	51461.8	129709	57795.8	359924	91081.2	36717.8	61575.4	11692.6	126979	400706	23840.4	26754.1	35421.8	38249.2	142715	54099.4	45093.5	110862	10388.2	40754.4	8933.88	121997	59170.5	9329.89	34520.2	11588.1	52236	42093.6
M88T351	[M-H]-	Sarcosine	1.79944	0.333071	0.020288	88.04	351.052	4.9362	HMDB0000271	C00213	Organic acids and derivatives	Carboxylic acids and derivatives	Amino acids, peptides, and analogues	362.843	10	10	90335.9	91076.3	295316	94614.9	208282	76445.9	47012.5	91715.5	107641	43842	75759	50961.5	14899.7	79682.1	107887	47295.5	27972.3	40626.1	34370.1	101710	45163.4	53771.8	52157.3	12695.2	90647.7	12831.7	53045.5	69185.4	18235.9	54159.8	23458.9	103071	44168.3
M485T93	[M-H]-	Quillaic acid	1.80566	0.511632	0.0211659	485.326	93.366	5.40028		C08972	Lipids and lipid-like molecules	Prenol lipids	Triterpenoids	102.258	10	10	158128	403154	245130	90460.4	216687	89952.2	343462	170093	123900	173788	77256.4	607205	531109	166194	196340	101018	181142	61886.3	166085	222689	114337	153877	220650	70758.1	124823	139022	327713	127753	98621.2	97095.8	111434	229960	101922
M158T198	[M-H]-	Isovalerylglycine	2.55022	0.236209	0.0212099	158.082	198.012	1.28604	HMDB0000678		Organic acids and derivatives	Carboxylic acids and derivatives	Amino acids, peptides, and analogues	202.311	10	10	49375.9	123691	495337	63055.5	208590	119287	307068	132833	329278	204758	113186	150878	13644.8	473049	900305	113170	53234.8	35102.1	96383.6	458592	56103.2	116687	400941	48801.3	91048.3	24383.5	200420	214874	23329.3	58785.3	54889.3	155371	202009
M146T301_2	[M-H]-	Glutamic acid	3.67858	0.332001	0.0226522	146.046	300.877	4.53856	HMDB0000148	C00025	Organic acids and derivatives	Carboxylic acids and derivatives	Amino acids, peptides, and analogues	305.905	10	10	146944	779752	1.28831e+06	855738	1.84897e+06	472742	229490	641281	237132	237784	277862	2.39912e+06	466700	479151	866690	198022	214145	295071	100938	433655	318255	80202.5	265626	111058	464267	55742.3	433562	479965	319265	768175	122179	190438	1.22445e+06
M208T72	[M-H]-	4-morpholinopropanesulfonic acid	5.30807	0.212919	0.0240611	208.065	72.067	0.347608			Organoheterocyclic compounds	Oxazinanes	Morpholines	84.239	10	10	1.73618e+06	175714	1.70091e+06	150332	480158	65090.5	291678	90785.3	1.57047e+06	173940	735132	885969	62460.7	391887	1.59621e+06	88691.1	93155.4	84262.7	295014	798876	129397	184861	247548	24015.5	72669.8	33812.5	934972	71815.7	55206.4	105142	559273	2.30356e+06	108185
M137T180	[M-H]-	Salicylic acid	1.04519	0.476911	0.0248016	137.024	180.244	1.12322	HMDB0001895	C00805	Benzenoids	Benzene and substituted derivatives	Benzoic acids and derivatives	187.542	10	10	73449.8	41971.6	168077	68301.3	93607.3	41167.4	41122.5	41877.1	62780	28381.7	45143.2	33384.5	21081.9	51369.7	46032.3	45993.2	39853.4	41966.1	24899.6	43937	36217.2	27396.8	35371.3	27935.3	71274.5	18683.9	157240	42961.9	27896.4	61315.1	14943	61202.8	88058.8
M401T103	[M-H]-	Dehydrocholic acid	1.36614	0.452528	0.0248085	401.233	103.355	3.22494		C13154	Lipids and lipid-like molecules	Steroids and steroid derivatives	Bile acids, alcohols and derivatives	105.287	5	7	481780	112739	275599	66232.4	224148	55984.9	22939.6	30603.7	63285.2	52271.4	28739	18766.2	40018.5	128555	74509.5	42010.2	48370.6	39900.5	40558	135879	48789.7	38553.6	110863	36896.3	44060.7	33016.7	325428	22713.1	31217.9	36926.2	61903.7	54083.2	13252.4
M172T196_2	[M-H]-	Hexanoylglycine	3.49514	0.257884	0.0253268	172.098	196.087	0.917401	HMDB0000701		Organic acids and derivatives	Carboxylic acids and derivatives	Amino acids, peptides, and analogues	211.92	10	10	168205	135739	3.02284e+06	180865	602522	224723	104382	220978	792439	99108.3	276530	118280	30310.4	394521	179588	149013	99857.6	226337	153887	557190	105324	115535	101014	28095.6	324287	34159.3	851291	152955	25813.7	130199	42151.4	239355	157695
M109T25	[M-H]-	Hydroquinone	3.47983	0.223341	0.0288944	109.029	25.4825	1.43122	HMDB0002434	C00530	Benzenoids	Phenols	Benzenediols	27.601	9	9	808778	33411.5	950630	60469.8	808595	26938.9	615432	20789	12754	251961	151464	106945	6564.69	678989	872142	164002	54641	28120.4	43432.4	781941	99958.7	212781	609751	20223.3	86533	11089.4	32995.1	88881.9	25401.3	37722.1	13000.2	82609.8	173603
M217T31_2	[M+Cl]-	Isoevernic acid	2.99931	0.175162	0.0304181	217.017	30.786	0.183898			Benzenoids	Benzene and substituted derivatives	Benzoic acids and derivatives	43.967	9	7	130146	48044.6	402522	248266	411653	6593.92	310751	17979.8	23125.2	209247	95772.4	92193.9	19908.3	228919	823091	87121.4	56339.1	27309.1	24565.4	422438	45230.2	91902	259871	19328.7	28672.1	13555.9	29710.4	50516.8	15581.8	24743.9	17320	75935.6	42958.4
M124T297_2	[M-H]-	Taurine	4.17271	0.312572	0.0315976	124.007	296.684	1.41922	HMDB0000251	C00245	Organic acids and derivatives	Organic sulfonic acids and derivatives	Organosulfonic acids and derivatives	300.815	10	10	2.64771e+06	155456	884610	951390	771095	496539	1.2441e+06	634968	93504.6	892150	378810	2.32507e+06	67765.2	1.55949e+06	3.0247e+06	489222	358440	429139	316545	3.68366e+06	489580	343573	2.82714e+06	130143	227696	46203.1	126469	1.02723e+06	142693	326396	425476	1.47024e+06	632242
M196T317	[M-H]-	N-acetylhistidine	1.12289	0.432846	0.0321294	196.073	317.36	0.608861	HMDB0014748	C02997	Organic acids and derivatives	Carboxylic acids and derivatives	Amino acids, peptides, and analogues	323.534	9	10	19259.3	76791.1	158399	46198.4	101269	17226.8	51981.1	34842.9	20970.9	48052.8	34747.4	92851.8	66022	38625.4	163430	19124.7	16113.3	16534.4	24513.5	51257.6	20945.7	18496.6	54042.7	10947.9	19209.8	13563.5	40586.3	23257	15760.3	33239.7	37859.1	48751.4	35578
M135T133	[M-H]-	Phenylacetic acid	1.40194	0.623328	0.0327725	135.045	133.434	1.67672	HMDB0000209	C07086				138.486	10	10	150907	109767	343440	85364.7	212153	170721	89875.6	147539	370074	123644	320087	113760	167219	271304	227633	138626	145633	167127	132949	377079	94674.6	124013	102987	63902.2	252359	95648	279049	124683	82801.6	123920	157937	126372	177135
M111T86_2	[M-H]-	Uracil	3.59643	0.62563	0.0336051	111.02	85.844	1.11397	HMDB0000300	C00106	Organoheterocyclic compounds	Diazines	Pyrimidines and pyrimidine derivatives	99.237	10	10	2.38066e+06	1.16857e+06	788359	566435	1.62036e+06	533318	751296	940160	1.1979e+06	736870	989707	983981	724001	1.12931e+06	1.14703e+06	498213	583353	384483	703817	770444	519693	499809	497402	405986	334215	347546	340282	272619	473952	302409	838201	746335	686500
M476T172	[M-H]-	Lpe 18:2	3.09097	0.568301	0.0337964	476.278	171.64	1.16941			Lipids and lipid-like molecules	Glycerophospholipids	Glycerophosphoethanolamines	175.893	10	10	792032	1.32768e+06	2.14258e+06	369995	1.73596e+06	1.89481e+06	619366	952879	173816	1.01477e+06	781540	944836	360066	950777	986598	795729	1.43911e+06	344481	301828	829657	1.03417e+06	1.1941e+06	675484	527789	751591	262055	1.331e+06	1.37975e+06	482181	764501	318803	729144	1.48652e+06
M160T65_2	[M-H]-	Quinoline-2,8-diol	4.50913	0.431511	0.0353051	160.04	64.812	0.770675			Organoheterocyclic compounds	Quinolines and derivatives	Quinolones and derivatives	66.271	8	9	848414	917610	1.40754e+06	530502	957197	830158	1.44937e+06	830041	2.77338e+06	850927	2.48189e+06	331811	1.17856e+06	3.78025e+06	4.92911e+06	451131	1.91979e+06	566281	855817	3.04381e+06	636118	1.09621e+06	1.03194e+06	566790	677024	952090	224429	599707	403095	655289	552855	1.37365e+06	799568
M116T162	[M-H]-	Indole	1.03239	0.276687	0.0400965	116.05	162.088	3.03527	HMDB0000738	C00463	Organoheterocyclic compounds	Indoles and derivatives	Indoles	174.633	9	9	302801	8338.14	111379	33483.8	58133.1	22935.5	37232.8	23380.3	11625.8	14639.9	21655.4	10341	2737.42	36233	61911.7	19785.5	9556.79	27719.6	13617	35541	19485.4	11476.7	22421.8	7325.37	19715.6	4667.9	87945.8	21687.3	6462.13	20503	2679.87	30745.3	15582.2
M151T37	[M-H]-	2-Hydroxyphenylacetic acid	1.11129	0.583672	0.0411641	151.04	37.2435	1.7772	HMDB0000669	C05852	Benzenoids	Benzene and substituted derivatives	Phenylacetic acids	49.87	4	5	69608.6	66627.4	78451.7	65896.8	129973	52706.2	89052.8	55066	59118.8	44025.5	66875.8	61212.2	36176.2	49760.2	88838	43752.3	45995.3	61952.6	58947.3	56360.6	41467	71204.8	42699	30368.4	61298.5	20510.3	24031.3	54890.8	39653.7	28600.3	29905.7	65503.8	48264.9
M261T249	[M-H]-	Homovanillic acid sulfate	1.97876	0.0767505	0.0417958	261.008	248.791	1.12335	HMDB0011719		Organic acids and derivatives	Organic sulfuric acids and derivatives	Arylsulfates	256.633	9	9	38449.5	13275.8	451136	6992.37	215695	19204.9	50255	29421.3	3659.41	36499.9	8915.23	32097.9	1228.46	48379.9	211432	15688.5	6673.29	2490.01	6183.06	71693.1	6800.3	15992.2	52674.9	958.923	5628.59	2190.47	29208.8	8904.12	3587.4	62689	3995.38	47796.5	10379.7
M487T171_2	[M-H]-	Polygalic acid	4.69105	0.502096	0.0424978	487.306	171.142	0.351779			Lipids and lipid-like molecules	Steroids and steroid derivatives	Hydroxysteroids	176.663	10	10	908709	3.10851e+06	882532	273610	2.57116e+06	204511	1.29349e+06	436347	1.33581e+06	470992	349028	1.40469e+06	690127	339332	436869	297786	291170	287141	590136	727107	376574	654036	423472	336738	671190	611854	1.09614e+06	183876	347504	329300	509551	939846	198143
M107T50	[M-H-CO2]-	3-hydroxyphenylacetic acid	1.76101	0.165784	0.0440873	107.05	49.829	0.608777	HMDB0000440	C05593	Benzenoids	Phenols	1-hydroxy-4-unsubstituted benzenoids	58.872	9	10	72737.7	19521.1	265639	13101.7	143046	7352.97	63511.9	11743.6	27897.5	37806.2	41033.2	34253.5	3294.1	64976.4	198028	25379.8	10341.2	9122.16	6111.43	99444.7	10494.1	22125.3	52295	7803.13	15259.8	4508.14	88897	13105.3	5424.25	6984.94	5571.74	27175.5	24519.8
M351T56	[M-H]-	Tebufenozide	1.03134	0.7381	0.044129	351.185	55.696	8.67161		C18526	Benzenoids	Benzene and substituted derivatives	Benzoic acids and derivatives	68.24	10	9	180589	192480	199762	245506	254418	151498	195426	163846	173238	377050	197022	236978	252499	229840	326023	141236	201864	209762	290283	308387	196044	234578	109826	139945	287180	230025	263876	129722	104806	196847	283734	287629	161494
M243T100	[M-H]-	3-hydroxymyristic acid	1.13374	0.532085	0.0456534	243.197	100.4	1.57214	HMDB0061656		Lipids and lipid-like molecules	Fatty Acyls	Fatty acids and conjugates	103.135	6	7	45682.7	51559.7	64329.8	32670.7	93642.8	27442.6	50117.8	21015.2	180767	62974.5	44235.2	76718.4	44500.2	70983.7	114530	43833.7	29128.2	30408.7	37006.5	105817	35443.7	36399.3	72950.5	26712.1	29769.3	39771	63767.7	25538.2	29534.8	27894.4	41675.6	27833.7	28740.7
M137T291	[M-H]-	Urocanate	1.25726	0.458423	0.0481912	137.035	291.184	2.08012	HMDB0000301	C00785	Organoheterocyclic compounds	Azoles	Imidazoles	294.705	10	10	34503	183413	362733	44739.5	213712	25809.8	40573.9	80278.8	101294	28577.8	36406.4	33393.3	24013.8	41073.3	62680.8	48867.7	19080.4	25434.3	20619	80776.2	53796.5	79948.6	44684.5	12922.4	51366.1	58259.8	99583.5	24548.4	37773.9	46639.1	15334.2	55051.3	26077
M361T279	[M-H]-	19,20-dihydroxy-4z,7z,10z,13z,16z-docosapentaenoic acid	1.14795	0.678592	0.0495668	361.223	279.175	0.443389	HMDB0010214		Lipids and lipid-like molecules	Fatty Acyls	Fatty acids and conjugates	282.071	10	10	213756	378665	278461	206262	270508	132664	109243	113884	286748	267892	115285	250182	287112	133383	150188	108730	135345	152334	127114	213008	108295	253348	91478.4	72568.5	351618	129592	182544	119395	133542	117490	145220	272809	75388.5
M245T28	[M-H]-	2'-chloro-2-hydroxy-5-methylbenzophenone	3.83238	1.79937	0.0499704	245.049	28.194	1.47468			Benzenoids	Benzene and substituted derivatives	Benzophenones	30.83	10	10	42487.2	14358.8	16056.2	136676	20496.5	312126	441496	187522	90090.1	515159	509325	323929	1.17666e+06	339887	233568	563206	778309	158661	961182	341080	643502	427102	670197	908762	117239	727548	21020.5	681149	693891	431785	1.01765e+06	230316	269216
M309T81	[M-H]-	9-hydroperoxy-10e,12z,15z-octadecatrienoic acid	5.30817	1.46448	0.0517668	309.207	80.847	3.30883			Lipids and lipid-like molecules	Fatty Acyls	Lineolic acids and derivatives	82.977	8	7	470040	503240	1.70739e+06	3.27137e+06	504418	2.09322e+06	1.28687e+06	4.36041e+06	415165	2.77631e+06	2.5959e+06	1.4735e+06	1.54301e+06	2.2502e+06	2.60333e+06	2.12811e+06	2.43045e+06	2.79461e+06	2.91288e+06	2.21565e+06	1.8878e+06	1.90352e+06	2.35453e+06	1.45092e+06	1.46682e+06	1.67557e+06	1.72713e+06	2.12371e+06	1.50627e+06	1.67589e+06	3.45528e+06	1.57609e+06	2.43887e+06
M131T134_2	[M-H]-	Hydroxyisocaproic acid	5.74561	0.481001	0.0541472	131.071	133.525	1.15701	HMDB0000665		Lipids and lipid-like molecules	Fatty Acyls	Fatty acids and conjugates	140.036	10	10	622952	4.64465e+06	8.02819e+06	1.26772e+07	4.64714e+06	2.16969e+06	5.60012e+06	8.6944e+06	967009	3.53511e+06	4.42968e+06	3.38095e+06	455307	2.72038e+06	5.65628e+06	2.15671e+06	1.52722e+06	3.45567e+06	4.24783e+06	2.29412e+06	7.35246e+06	2.44686e+06	1.90749e+06	2.95051e+06	1.55776e+06	615341	5.03505e+06	9.30297e+06	1.55688e+06	5.48737e+06	277593	1.01171e+07	4.24883e+06
M391T27_2	[M-H]-	1-piperazineacetic acid, 4-(phenylmethyl)-, 2-[[2-hydroxy-3-(2-propen-1-yl)phenyl]methylene]hydrazide	2.54088	1.87011	0.0541597	391.215	27.427	0.905159			Organoheterocyclic compounds	Diazinanes	Piperazines	34.025	9	10	34462.8	44157.2	52097.7	170828	56274	593185	123988	407354	40605.7	137367	295538	89796.2	89075.9	112580	107733	194078	287581	151851	121394	108507	453616	210724	319981	320345	83288.7	155346	82145.7	388935	347885	317188	324253	134692	204425
M181T72	[M-H]-	(n-(-2-acetamido))-2-aminoethanesulfonic acid	1.56373	0.789319	0.0545285	181.017	72.43	1.2804			Organic acids and derivatives	Organic sulfonic acids and derivatives	Organosulfonic acids and derivatives	83.479	10	10	1.08094e+06	398704	380676	397746	399891	364411	421153	456652	517405	421598	508589	532385	644056	429722	595795	378556	445375	446907	413083	530211	452206	417934	292586	383049	331252	347009	448339	317566	335506	339180	675896	600131	315192
M295T56_2	[M-H]-	12(13)-epoxy-9z-octadecenoic acid	12.1315	1.26167	0.0576707	295.228	56.19	1.79827	HMDB0004702		Lipids and lipid-like molecules	Fatty Acyls	Fatty acids and conjugates	58.833	10	10	7.43154e+06	3.55047e+06	1.83865e+07	1.84263e+07	8.97241e+06	1.70013e+07	1.06194e+07	2.4163e+07	2.79005e+06	1.60184e+07	1.59511e+07	8.73839e+06	1.00787e+07	1.05947e+07	1.3365e+07	1.50667e+07	1.42081e+07	1.32254e+07	1.51708e+07	1.35854e+07	1.07933e+07	1.07279e+07	1.37113e+07	1.33577e+07	9.07987e+06	1.08391e+07	1.49769e+07	1.22021e+07	9.49758e+06	9.38618e+06	1.72291e+07	1.0646e+07	1.49888e+07
M203T261	[M-H]-	Tryptophan	1.00012	0.406528	0.0603089	203.083	261.281	0.222357	HMDB0000929	C00078	Organoheterocyclic compounds	Indoles and derivatives	Indolyl carboxylic acids and derivatives	267.836	10	10	19329.7	80167.1	223060	177473	281948	216124	38744.1	247291	28764.3	139229	73362.6	59986.8	6251.04	149539	50398.5	69132.5	39847.2	207817	195780	90660.8	81755.4	162424	37760	12432	306652	7952.99	72228.4	388463	21393.6	189075	10586.1	305818	55805.4
M121T123_2	[M-H]-	Benzoic acid	2.77845	0.513731	0.0604108	121.029	123.094	0.55051	HMDB0001870	C00180	Benzenoids	Benzene and substituted derivatives	Benzoic acids and derivatives	128.226	10	10	588131	319330	2.0298e+06	229750	1.00834e+06	371270	763981	384716	178471	188445	298564	292131	213637	304596	551953	237085	329513	211778	158687	354042	166221	289426	165838	113356	219718	111164	765316	181444	365610	237726	499019	587847	202987
M405T26_2	[M-H]-	Lincomycin	4.36199	1.85539	0.0605172	405.195	26.3715	1.5505		C06812	Organic acids and derivatives	Carboxylic acids and derivatives	Amino acids, peptides, and analogues	31.855	10	10	53855.7	63408.4	51061.7	342484	48853.9	1.7511e+06	332795	995835	58344.6	407354	754292	190166	232677	306408	198986	629325	996783	412344	260696	289375	1.22395e+06	508550	843551	1.07719e+06	230382	328688	134747	1.0628e+06	1.06612e+06	808566	626417	434036	711522
M780T114	[2M-H]-	3.alpha.-hydroxy-7-oxo-5.beta.-cholanic acid	1.94713	0.621164	0.0609037	779.549	114.42	0.995793			Lipids and lipid-like molecules	Steroids and steroid derivatives	Bile acids, alcohols and derivatives	130.34	10	10	128903	749667	64412.3	151019	368049	142306	163566	148230	624939	109576	294155	392240	370982	247420	356760	91124.6	245646	289988	118298	459085	368542	137083	209136	151816	339352	187576	145790	126611	139140	128928	211219	493764	251046
M405T147_2	[M-H]-	3-dehydrocholic acid	6.17151	0.649549	0.0621364	405.264	147.056	1.87512						150.484	10	10	8.35742e+06	5.84776e+06	3.7574e+06	2.47846e+06	6.01808e+06	2.5295e+06	1.48202e+06	2.46761e+06	2.78254e+06	1.75702e+06	2.2096e+06	4.10207e+06	4.24769e+06	3.0267e+06	3.06876e+06	1.66494e+06	1.74286e+06	2.40892e+06	1.80223e+06	3.29476e+06	2.66637e+06	1.27779e+06	2.13673e+06	1.10218e+06	2.54516e+06	1.12144e+06	5.06199e+06	1.81855e+06	1.24139e+06	1.9004e+06	3.21152e+06	5.74875e+06	1.62756e+06
M146T196	[M-H]-	Isatin	1.06257	0.451348	0.0634031	146.025	196.22	1.71322	HMDB0061933	C11129	Organoheterocyclic compounds	Indoles and derivatives	Indolines	202.248	10	10	205319	38319.1	121430	56612.4	102137	30100.3	39999.8	38989.6	55878.9	26158.2	32209.1	22473.4	5851.08	26968	35873	21987.7	28925.4	39811.1	14263	27567.7	21686.8	13024.1	26503.5	19305.3	55864.3	3264.9	175484	17874.7	11994.9	15515.2	19928.8	65299.4	27262.3
M195T152	[M-H]-	Hydroferulic acid	1.09726	2.0413	0.0643042	195.066	151.661	3.23631	HMDB0062121					165.27	10	10	42443.5	59059.1	184903	70870.6	60224.9	96539.9	158048	63738.2	29520	82371.8	167248	279039	68955	48749.2	77658.5	333401	61930.8	54525.4	108754	28873.2	265807	36399.4	206261	83776.4	115334	34725.7	44897.9	99215.4	114152	281631	54671.3	86178.6	611719
M212T29	[M-H]-	Indoxyl sulfate	19.835	0.151625	0.0660733	212.003	28.816	0.968205	HMDB0000682		Organic acids and derivatives	Organic sulfuric acids and derivatives	Arylsulfates	31.47	10	10	6.21793e+07	1.15018e+06	1.96631e+07	1.66232e+06	1.98913e+07	549602	2.17269e+07	641696	347309	1.37088e+07	4.60953e+06	5.0672e+06	321152	1.4833e+07	6.02626e+07	4.20536e+06	3.0715e+06	577258	854881	3.78728e+07	1.54231e+06	6.40729e+06	1.43182e+07	528940	771260	397510	1.84281e+06	2.41333e+06	669925	759677	196530	2.37957e+06	3.92025e+06
M228T64	[M-H]-	N-tris(hydroxymethyl)methyl-2-aminoethanesulfonic acid	1.29345	0.381522	0.066109	228.034	63.574	1.56986		C05353	Organic acids and derivatives	Organic sulfonic acids and derivatives	Organosulfonic acids and derivatives	84.12	7	7	242330	30357.9	178135	32538.7	74828.6	18023.4	87705.4	36306.2	13336.3	59286.4	23892.7	52805.2	37887.7	40157.7	251680	24346.6	18766.2	32226.9	33780.8	82751.8	35284.1	28582.9	51144.9	4241.79	22224.5	30496.8	63420.4	31356.3	27945.8	32560.2	17988.9	40512.4	25593.9
M199T52_2	[M-H]-	Dodecanoic acid	1.57969	0.65646	0.0707829	199.17	51.858	1.14644	HMDB0000638	C02679	Lipids and lipid-like molecules	Fatty Acyls	Fatty acids and conjugates	52.675	10	10	171502	262666	281287	195802	314618	215835	183483	214614	720781	237475	305036	203403	220132	326023	334278	217202	213021	234285	216367	311061	172818	271014	187232	203544	200015	263415	226741	210299	172638	165984	198590	193056	199187
M161T302	[M-H-C6H12O6]-	D-turanose	1.47283	1.51323	0.0711626	161.046	301.973	0.412807	HMDB0011740	C19636	Lipids and lipid-like molecules	Fatty Acyls	Fatty acyl glycosides	306.617	9	9	119922	61915	81764.8	263249	172869	454523	311442	274405	93001	400136	104940	92600.4	50934.3	151539	104148	81344.6	205557	338819	100709	124083	203610	56942.8	101678	119662	220989	48540.7	62694.1	394405	154847	148491	120796	102071	85615.5
M423T38	[M-H-H2O]-	Cortisol 21-sulfate	1.19253	1.84857	0.0711832	423.169	38.2785	6.79537	HMDB0062779	C02822	Lipids and lipid-like molecules	Steroids and steroid derivatives	Sulfated steroids	55.921	7	5	27390.9	24636.4	26673.6	71307.1	25005.7	140332	82878	170648	33042.4	128600	63573.6	52446.9	115347	54198.2	121849	111309	67880.3	62434.4	107448	48884.1	250603	65745	105512	108827	41689.2	97079.1	21531.2	91816.6	118947	69869.7	301957	107361	103227
M471T154	[M-H-C2H2O]-	3-ketofusidic acid	3.94978	0.669697	0.0714376	471.312	153.832	1.99078			Lipids and lipid-like molecules	Steroids and steroid derivatives	Steroid esters	157.494	8	10	901879	8.13827e+06	999284	479469	2.05022e+06	366493	2.07853e+06	1.21537e+06	1.68788e+06	881951	607172	2.72944e+06	2.25771e+06	499683	546985	657824	827320	506685	967919	933789	734009	1.34706e+06	356409	937540	967292	1.37078e+06	1.64322e+06	345516	862613	709311	1.89187e+06	1.30111e+06	314713
M125T75	[M-H]-	Thymine	1.78458	0.652813	0.0722356	125.035	74.712	1.91457	HMDB0000262	C00178	Organoheterocyclic compounds	Diazines	Pyrimidines and pyrimidine derivatives	76.021	10	10	1.0703e+06	267764	490430	204445	267979	98282.2	199035	233894	368130	137932	234020	238362	185785	209985	290988	124126	136361	103032	185558	126897	169309	164785	129921	139202	63462.3	98501.5	397967	122884	142344	106117	162218	248057	166941
M563T34	[M-H]-	Cer(d18:1/18:1(9Z))	1.15876	0.48917	0.0726456	562.521	34.0225	1.85009	HMDB0004948	C00195	Lipids and lipid-like molecules	Sphingolipids	Ceramides	41.149	8	9	52183	180529	107671	35769.1	163933	48136	49424.6	32697.6	76106.3	102653	36014.5	116899	49188.6	22377.5	25473	46425.5	33518	31526.7	52881.8	37297.9	27368.5	69842.4	9613.07	38186.5	15981.2	57867.4	101765	34533	51766.4	46044.8	35601.6	43340.5	50947.3
M206T264	[M-H-NH3]-	3-hydroxykynurenine	7.38041	1.57041	0.0732152	206.046	264.438	1.89356	HMDB0000732	C02794	Organic oxygen compounds	Organooxygen compounds	Carbonyl compounds	266.032	10	10	94566.2	464508	38880.3	2.59342e+06	230013	3.30605e+06	2.81128e+06	1.68112e+06	980557	2.49617e+06	2.38446e+06	1.92475e+06	952739	1.17798e+06	2.91803e+06	2.62469e+06	3.64788e+06	3.34601e+06	1.62276e+06	1.6583e+06	2.92089e+06	908793	3.83267e+06	3.12343e+06	1.64461e+06	662539	132601	2.79955e+06	3.10678e+06	1.68318e+06	5.11211e+06	2.328e+06	2.06112e+06
M349T67_2	[M-H]-	Tetrahydrocorticosterone	1.25894	0.650659	0.073426	349.238	66.954	0.912454	HMDB0000268	C05476	Lipids and lipid-like molecules	Steroids and steroid derivatives	Hydroxysteroids	71.05	10	10	135513	210057	194042	56068.2	363196	102413	66075.5	75817.9	282987	121506	197504	182429	189014	160703	105625	94742.8	115820	114320	128535	247710	99622.7	102138	60586.1	76798.9	154700	110393	203320	71761.5	55815.6	82327.2	139668	136828	87993.5
M514T178_2	[M-H]-	Taurocholate	5.46697	1.67066	0.0761555	514.285	177.811	1.11765	HMDB0000036	C05122	Lipids and lipid-like molecules	Steroids and steroid derivatives	Bile acids, alcohols and derivatives	182.192	10	10	679242	771093	401904	1.60534e+06	468317	1.467e+06	1.38284e+06	1.09473e+06	677927	1.39918e+06	2.56174e+06	2.71223e+06	590600	1.43971e+06	1.36025e+06	2.71799e+06	983598	1.8249e+06	3.17696e+06	1.74092e+06	3.48866e+06	1.41441e+06	3.0703e+06	1.35883e+06	1.1934e+06	395990	1.61151e+06	1.36443e+06	2.49015e+06	1.54421e+06	2.24691e+06	2.3065e+06	1.01099e+06
M134T194	[M-H]-	Acetylaniline	1.66715	0.244779	0.0775719	134.061	194.097	0.684601	HMDB0001250	C07565				200.208	10	10	116976	32159.3	156819	52724.7	126166	18864.8	122823	29911.9	34893.2	126142	47927.1	67890.5	6374.63	111837	488112	42879.8	25726	31265.7	13538.9	165372	26276.3	46878.7	218360	14635	40610.8	6209.14	102023	30175.7	12492.8	14068.4	10457.8	60296.8	50264.5
M160T331	[M-H-C2H2O]-	1-(2,8-dihydroxyquinolin-5-yl)ethan-1-one	2.10335	1.60558	0.0793229	160.04	330.882	1.92808			Organoheterocyclic compounds	Quinolines and derivatives	Quinolones and derivatives	347.917	6	2	18093.9	53442.8	13439	211008	26338.7	129429	218318	147407	86183.3	200819	131067	172629	91227.8	107246	88862	228580	325643	275524	39381.1	51614.7	99237.8	98441.6	272197	269076	55985.2	38162.9	20919.2	240248	276097	25782.9	386599	186204	183371
M315T102	[M+HCO2]-	Methyl hexadecanoate	3.64371	0.623797	0.0798416	315.254	101.782	0.261886	HMDB0061859	C16995	Lipids and lipid-like molecules	Fatty Acyls	Fatty acid esters	107.654	10	10	335534	613767	1.379e+06	646881	2.2583e+06	682900	969643	752884	1.60134e+06	3.23465e+06	1.37049e+06	1.8944e+06	1.46081e+06	1.66481e+06	2.27758e+06	645014	671230	371688	863049	1.99052e+06	525191	807308	1.29998e+06	638784	172963	1.44239e+06	949401	624921	531149	487556	1.41051e+06	917660	769719
M188T271_2	[M-H]-	Asn-Gly	1.00843	0.39153	0.0864023	188.093	271.483	1.08722			Organic acids and derivatives	Carboxylic acids and derivatives	Amino acids, peptides, and analogues	284.477	10	10	59710.3	13730.6	100102	31810	80710.9	23353.8	43361.1	45885.5	9215.65	38367.9	60492.7	42907.4	9780.2	71875.7	205201	23396.5	23666.1	13923	19656.4	128640	24079.9	30139.4	53613.6	13482.2	40800.7	8864	32294	24156.8	9757.19	18454.9	13131.9	33728.3	20182.6
M411T62	[2M-H]-	Dl-alpha-lipoic acid	1.9499	0.273226	0.0872191	411.075	61.768	0.282659			Organoheterocyclic compounds	Dithiolanes	Lipoic acids and derivatives	75.849	10	10	532143	80664.2	149732	41297.5	109217	30481.8	70897.9	42357.8	71695.6	71168.9	50420.8	130382	40879.7	32679.6	528543	117410	31630.2	6492.28	52013.1	65852.7	15823.1	61803.2	131244	41083.2	17409.6	58759.2	169334	51404.3	52492.3	78456.6	25041.9	50471.2	47706.9
M116T306	[M-H]-	Valine	2.40899	0.476177	0.0878158	116.072	306.171	6.23279	HMDB0000883	C00183	Organic acids and derivatives	Carboxylic acids and derivatives	Amino acids, peptides, and analogues	317.95	10	10	122380	428007	1.17682e+06	379054	1.37987e+06	654816	139537	730484	209442	309357	169834	167840	32897.5	965886	283799	165845	236529	701371	407460	726036	167795	551457	196909	39050.1	932423	111821	263162	590532	40684	303111	116675	675787	143833
M293T53_2	[M-H-H2O]-	13s-hydroperoxy-9z,11e-octadecadienoic acid	7.90823	1.33022	0.0894541	293.212	53.306	1.03164		C04717	Lipids and lipid-like molecules	Fatty Acyls	Lineolic acids and derivatives	54.343	10	10	1.85223e+06	1.41359e+06	4.47641e+06	5.31513e+06	2.48897e+06	7.6911e+06	3.94927e+06	8.80015e+06	1.38127e+06	7.19394e+06	9.90213e+06	3.36913e+06	6.39549e+06	5.35872e+06	5.12395e+06	4.65308e+06	8.17086e+06	6.93552e+06	7.47811e+06	4.70965e+06	4.6201e+06	6.44451e+06	7.41736e+06	5.85074e+06	3.22706e+06	3.8098e+06	6.66882e+06	5.30982e+06	3.95648e+06	4.01593e+06	8.45958e+06	5.60786e+06	9.43303e+06
M147T235_2	[M-H]-	Mevalonic acid	1.87677	0.236319	0.0904881	147.066	234.995	0.832044	HMDB0000227	C00418	Lipids and lipid-like molecules	Fatty Acyls	Fatty acids and conjugates	238.405	9	8	1.36465e+06	29772.3	962560	53318.5	49682.7	25474.6	57909.8	38797.4	434784	45432.9	40376.5	18721.3	9596.37	24518.7	48545.5	27266.2	30022.2	30095.7	35716.4	40215.8	44652.3	25249.4	41427.7	34724.4	26439	8075.12	1.35287e+06	51273.6	24251.2	36738.5	18455.4	89917.3	26347.9
M357T70	[M-H]-	Psoromic acid	2.12599	0.681828	0.0906227	357.079	70.374	1.42513						81.929	10	10	1.58823e+06	552831	599548	556333	544446	1.04939e+06	543702	968881	1.24135e+06	390342	1.79787e+06	580394	272672	1.52481e+06	1.50948e+06	597085	1.0272e+06	1.02088e+06	610852	1.39003e+06	780715	420216	836052	493992	1.02038e+06	193243	555870	593651	362749	627557	670099	894091	759725
M373T60	[M-H-H2O]-	Isodeoxycholic acid	1.64566	0.723983	0.0930424	373.275	60.164	3.27458	HMDB0002536	C17661	Lipids and lipid-like molecules	Steroids and steroid derivatives	Bile acids, alcohols and derivatives	61.548	10	10	912134	300795	638072	324928	427144	236311	146371	383888	348767	157992	357604	124820	224472	473014	533827	180278	286965	365286	111328	470637	318817	162384	630249	161431	394660	224915	862212	208512	171898	170610	306562	139260	305729
M413T59	[M-H]-	Doxorubicinone	1.25306	0.477424	0.0972276	413.091	59.313	0.843894			Benzenoids	Naphthacenes	Tetracenequinones	72.251	10	8	319448	80840.3	195064	45624.9	161029	35979.6	65071.8	32464.4	23591.9	110451	36323.9	90142.3	9752.24	31614.5	199075	108381	25367.3	13389.1	16219.9	55750.8	20807.4	83838.3	28867.8	53315.9	24288.6	40660.5	112497	45095.3	52215.8	90957.4	50024.2	56895.1	37309.1
M389T30	[M-H]-	20-trifluoroleukotriene b4	5.22757	1.70432	0.0982525	389.2	30.347	2.73635			Lipids and lipid-like molecules	Fatty Acyls	Eicosanoids	32.919	10	10	81489.4	101005	133361	609070	86054.1	2.56034e+06	524258	1.35386e+06	103683	663781	1.2086e+06	301257	365667	484988	442293	1.03836e+06	1.33169e+06	652229	490179	395743	1.8369e+06	832513	1.13013e+06	1.69323e+06	437851	351088	279242	1.75882e+06	1.5681e+06	1.36851e+06	902240	715965	1.24696e+06
M349T217	[M-H-H2O]-	11-dehydrothromboxane b2	0.384477	1.00961	0.963848	349.202	216.514	0.428401		C05964	Lipids and lipid-like molecules	Fatty Acyls	Eicosanoids	221.907	10	10	47918.5	78955.3	19037.2	50688.5	89009.6	78202.1	49052.4	116958	120848	116659	56529.7	92838	145885	52155.8	66493.4	106700	53649.9	43138.5	62617.8	34936.3	148697	83974	52245	76400.5	31119.2	171961	26270	58194.3	100536	65483.5	57475.2	27843	42603.5
M347T218	[M-H]-	11-deoxy-11-methylene-15-ketoprostaglandin d2	0.81441	0.741136	0.449193	347.244	217.914	4.17906			Lipids and lipid-like molecules	Fatty Acyls	Eicosanoids	230.497	8	10	150260	194391	46012.5	73900.2	202175	162437	37929.9	43010.6	52563.2	38622.4	255881	38791.9	54485.6	40285.1	47683.7	34191.3	43374.3	43301.9	44734.4	210527	37765.9	149462	72111.6	33010.4	218119	35079.9	51602	31994.7	23240.2	30453.1	78972.1	148434	136957
M311T161	[M-H-H2O]-	11-hydroxy-.delta.9-tetrahydrocannabinol	0.583499	1.61554	0.12686	311.196	161.245	8.6827	HMDB0060906		Organoheterocyclic compounds	Benzopyrans	1-benzopyrans	169.203	5	7	1709.98	3068.3	10213.3	41307.4	7475.62	5348.48	6869.68	43338.7	9512.15	8356.01	7473.51	3605.99	13609.4	7888.22	4359.31	26637.4	7326.15	4589.75	42063.1	9039.48	11556.4	26556.2	43617.6	29329.7	8652.68	24338.2	6725.06	7192.66	24483.6	22900.3	37809.2	27650	3353.34
M343T167	[M-H]-	11-nor-9-carboxy-.delta.9-tetrahydrocannabinol	0.43777	1.03374	0.830474	343.212	167.18	0.43055			Organoheterocyclic compounds	Benzopyrans	1-benzopyrans	174.469	7	6	144026	71343.6	101578	140331	104971	117149	110407	264962	122701	155019	127248	79612.8	113081	176271	101361	154827	124934	161893	131413	140585	72753.4	167198	121712	129108	154284	134055	220550	141829	44850	129784	219716	148710	55233.6
M547T189	[M-H]-	1-[2,4,6-trihydroxy-3-[7-hydroxy-2-(4-hydroxyphenyl)-3,4-dihydro-2h-chromen-4-yl]phenyl]dodecan-1-one	0.741361	0.896303	0.612462	547.295	188.783	2.33089			Phenylpropanoids and polyketides	Flavonoids	Hydroxyflavonoids	193.688	10	10	32699.9	80321.5	13344.7	39012.5	35547.7	23933.4	55898.9	64063	77885.9	49121.5	49715.6	122786	136758	30231.7	51978.6	36788.3	46042.2	33107.3	52632.5	36196.2	76071.5	31262.3	32026.9	48056.4	27319	87307.4	20595.1	32834.5	58426.3	76542.1	96005.5	47818	34223.6
M875T159	[M+HCO2]-	1,2-diarachidonoyl-sn-glycero-3-phosphocholine	0.246385	0.981578	0.933272	874.547	159.212	0.327605	HMDB0008443		Lipids and lipid-like molecules	Glycerophospholipids	Glycerophosphocholines	164.104	7	8	11739.6	5088.47	6736.93	6223.9	13351.8	6260.45	6388.89	10343.7	8490.03	9784.97	17170.9	6327.19	9285.62	28210.8	11386.2	7698.16	13359.7	13154.7	9752.5	13934.6	10095.8	3518.41	6865.28	6616.4	20071.6	13663.5	10045.2	5744.06	7522.8	30175.7	16453.5	9707.36	2161.68
M656T316	[M+Cl]-	1,2-dilauroyl-sn-glycero-3-phosphatidylcholine	0.140207	0.563984	0.191503	656.411	315.83	1.36427			Lipids and lipid-like molecules	Glycerophospholipids	Glycerophosphocholines	321.924	6	8	841.966	2332.99	7991.41	3267.99	8410.82	5007.27	942.039	1677.3	1690.15	2776.7	4865.26	824.393	616.233	4912.69	1032.16	726.309	1253.46	2573.42	3905.62	3540.59	784.715	5752.74	857.997	601.209	10259.4	828.664	7295.91	6103.14	778.366	1416.53	1010.04	6660.73	897.017
M381T256	[M-H-C14H26O]-	1,2-dimyristoyl-sn-glycero-3-phosphate	0.721743	1.30575	0.153319	381.228	256.396	0.466446			Lipids and lipid-like molecules	Glycerophospholipids	Glycerophosphates	259.482	10	10	79916.4	68054.2	41881.7	73152.4	22304	46710.5	49123.5	66885.4	62435	39229	42825.1	78266.3	47273.1	67771.3	28166.1	38506.3	53023	99070.4	40039.9	68579.3	116848	31655.3	26216.8	40296.4	88275.6	44647.3	64240.1	51914.3	78847.8	86885.9	57091.6	26865.8	26466.9
M770T36	[M-H-NH3]-	1,2-dioleoyl-sn-glycero-3-phospho-l-serine	0.831242	1.17332	0.403566	769.507	36.494	2.56339	HMDB0012390		Lipids and lipid-like molecules	Glycerophospholipids	Glycerophosphoserines	37.966	8	5	45895.4	31213	31439.3	60076.8	28678.3	70610.9	48421.2	57164.2	21574.9	66395.5	75770.2	35075.9	48926	52335.3	43699.1	41226.5	56163.2	58340.9	48568.6	47679.7	63914	56303.9	39788.9	40277	120085	39364.9	56436.4	50765.5	42134.3	44505.5	63256.2	49538.5	63020.6
M774T36	[M-H-NH3]-	1,2-distearoyl-sn-glycero-3-phospho-l-serine	1.99737	1.05589	0.91821	773.536	35.6925	0.474333	HMDB0012378		Lipids and lipid-like molecules	Glycerophospholipids	Glycerophosphoserines	57.021	9	9	221001	150897	255336	205720	275398	271734	132085	223578	29093.4	197447	371330	26096	156053	1.03004e+06	178837	116812	246372	308015	203880	401202	239234	189583	57472.2	139825	1.44527e+06	251724	375972	163195	87304.6	357995	233904	262372	143588
M704T106	[M-H]-	1,2-Distearoyl-sn-glycerol 3-phosphate(PA(18:0/18:0))	0.23638	0.763845	0.38648	703.516	105.515	2.81541						116.039	9	8	25009.3	17660.1	40024.4	77520.8	35218.6	58262.5	30323.8	36422.6	26128.2	54511.5	37043	30861.3	49853	130829	89288.2	49337.5	38273.4	29964.6	17095.7	157349	48885.2	28644.5	60831.3	23721.8	75667.2	20517.9	59295.6	21239.9	12903.7	43011.5	57743.2	38081.1	62315.1
M311T671	[M-H]-	1,3,6-trihydroxy-2-(3-methylbut-2-enyl)xanthen-9-one	0.785992	1.3461	0.138919	311.116	670.835	1.76699			Organoheterocyclic compounds	Benzopyrans	1-benzopyrans	700.369	10	10	23440.1	22055.2	27804.1	20214.4	21046.2	14319.4	52492.1	22216.7	13646.2	70740.8	19275.2	14730.8	5931.47	50755.8	21970.7	54409.6	59612.4	51912.3	40132.9	49426.8	23885.9	35019.1	18275.9	18302	53778.6	22963.4	26877.5	77500.8	40090.6	45967	47460.5	30709.5	40044.9
M483T63	[M-H-C7H4O4]-	1,3,6-tri-o-galloyl-.beta.-d-glucose	0.435431	0.452578	0.0118377	483.097	62.596	2.92241		C17458				75.421	7	4	5299.6	8812.59	5347.67	14378	16888.9	5975.27	23274.2	4438.16	7704.99	11056.7	5755.09	13373.3	13703.2	18080.6	41536.1	8500.66	14992.9	13067.1	3165.94	14051.1	2500.91	15552.4	13133.2	14088.3	11052.2	6109.59	8123.37	3841.76	11799.3	12456	17924	13802.5	13381.1
M299T59_4	[M-H]1-	13-hydroxy-9z,11e-octadecadienoic acid	4.82568	0.851645	0.600837	299.259	59.016	1.27062	HMDB0112194		Lipids and lipid-like molecules	Fatty Acyls	Lineolic acids and derivatives	60.79	10	10	740436	1.91633e+06	1.39026e+06	848438	4.74012e+06	769609	1.2487e+06	1.54241e+06	5.91221e+06	4.21181e+06	1.7449e+06	5.70766e+06	5.50866e+06	1.53845e+06	2.58952e+06	967419	1.05211e+06	725310	2.44159e+06	1.26962e+06	1.07296e+06	891263	831442	1.69663e+06	743552	8.59437e+06	1.77185e+06	979543	1.28191e+06	1.12599e+06	6.00325e+06	1.57718e+06	1.20665e+06
M477T297	[M-H]-	1,4-bis[(p-hydroxyphenethyl)amino]anthraquinone	0.207743	0.751856	0.25538	477.199	296.621	1.68443			Benzenoids	Anthracenes	Anthraquinones	304.458	9	10	4025.11	5141.27	3076.46	8127.08	6355.35	16114.4	5043.8	8379.06	23244	7282.64	6099.24	7677.75	3679.53	5258.11	7573.66	6234.29	5883.48	8139.64	4592.58	11038.5	8952.05	4115.25	5973.17	4271.97	10141.2	2852.4	1689.96	17459.9	6635.93	4311.15	8490.63	5913.12	6981.22
M341T92	[M+C2H3O2]-	1,4-d-xylobiose	1.05732	0.838534	0.586929	341.084	91.711	0.225947		C01630	Organic oxygen compounds	Organooxygen compounds	Carbohydrates and carbohydrate conjugates	106.178	10	10	177094	168399	54689.3	346320	200251	282769	194089	266968	45798.6	149706	377548	202766	114562	582776	479707	169649	241823	304645	214224	813275	157803	152542	201304	114877	558857	99409.3	52356.6	188342	118818	151154	219836	254289	193508
M327T324	[2M-H]-	1,5-anhydro-d-sorbitol	0.276504	0.755984	0.0260873	327.13	324.378	1.9798	HMDB0002712	C07326	Organic oxygen compounds	Organooxygen compounds	Carbohydrates and carbohydrate conjugates	330.153	9	10	11769.5	10056.6	15078.9	13867.9	14401.1	20904.7	11339.8	9917.24	16065.9	17714.2	13915.2	10232	10864.5	16662	16559.5	16516.6	7991.05	5981.49	9246.68	12751	14345	8603.24	13945.2	12358.8	9657.16	9224.72	9651.09	7601.28	10404.5	10187.4	11495.7	14288.6	8133.75
M365T36	[M-H]-	15-cyclohexylpentanorprostaglandin f2.alpha.	2.61641	1.32645	0.541254	365.237	36.4885	0.104347			Lipids and lipid-like molecules	Fatty Acyls	Eicosanoids	48.471	10	10	828950	1.69015e+06	39937.6	342135	204138	375725	529833	689252	242568	544050	881592	1.0498e+06	2.15646e+06	110634	313736	1.47802e+06	835816	190104	406274	87081	575676	159454	277949	955520	49741.6	1.70521e+06	229049	304997	1.32865e+06	1.19734e+06	1.59057e+06	271391	331945
M363T215	[M-H-H2O]-	16,16-dimethylprostaglandin f2.alpha.	0.260486	0.953396	0.765238	363.239	215.049	2.69935			Lipids and lipid-like molecules	Fatty Acyls	Eicosanoids	220.557	10	10	20181	16415.9	20269.2	16164.9	33477.9	18705.9	12589.3	20417.8	10076.9	24574.3	20360.7	13785.5	16603.6	25428.4	20530.5	15770.9	14707.6	29600.2	15316.6	28089.9	19340.8	15671.9	19255.8	14432.6	26721.9	16708.1	24732.6	14973.4	10707.9	14296.1	23133.6	23608.5	13010.7
M271T56	[M-H]-	16-hydroxyhexadecanoic acid	4.08872	0.613258	0.143333	271.228	55.765	0.645525	HMDB0006294	C18218	Lipids and lipid-like molecules	Fatty Acyls	Fatty acids and conjugates	63.77	6	6	1.70937e+06	1.77265e+06	2.02355e+06	249453	1.38461e+06	405361	1.0741e+06	288651	2.36748e+06	548346	469009	882061	863294	381770	739611	430839	328648	325788	558934	561909	297870	511576	481341	452492	515804	1.46732e+06	1.06247e+06	469206	595552	375435	963261	412693	423124
M405T98	[M-H]-	17.beta.-carboxy-17.alpha.-formyloxydexamethasone	1.83008	1.32394	0.337743	405.159	97.636	2.68412			Lipids and lipid-like molecules	Steroids and steroid derivatives	Steroid esters	113.075	9	7	87951.7	97139.3	102046	208719	50368.8	119939	106444	285046	84786.7	366233	166692	205038	268312	125521	562084	247301	364398	178029	294410	347132	117199	228941	289406	298687	294666	263852	172236	232007	244820	120825	291740	119113	346994
M385T165	[M-H-H2O]-	17-phenoxytrinorprostaglandin f2.alpha.	0.420313	0.573116	0.0836806	385.178	164.968	1.45679			Lipids and lipid-like molecules	Fatty Acyls	Eicosanoids	178.893	7	4	15043.1	10595.4	25266.8	9089.81	8175.29	8420.87	13076.7	12127.1	12339.7	8765.33	10100.4	4911.6	34325.5	38215.1	35226.2	13925.8	48475.7	34023.2	4950.95	6380.43	41438.3	4858.85	7063.07	10660.6	3103.5	6408.43	13650.4	31700.3	21640.3	45685.3	8703.34	33598	29651.9
M351T233	[M-H-H2O]-	17-phenyltrinor-13,14-dihydroprostaglandin a2	0.214485	0.836909	0.396895	351.182	233.215	1.11318			Lipids and lipid-like molecules	Fatty Acyls	Eicosanoids	238.38	8	9	15472.2	18673	16585.9	11679.4	21705.6	18527.8	9518.06	7276.36	7031.95	14895.2	10583.5	27662.9	14754.6	13475	38125.1	6388.5	14169.8	21955.4	18059.3	26668	7810.42	17640.7	11817.1	7775.44	23673.2	73141.3	19249.4	19261.2	8072.85	12184	22133	19185.1	9104.13
M365T381	[M-H-H2O]-	17-phenyltrinor-8-iso-prostaglandin e2	0.177271	0.668818	0.170779	365.157	380.62	1.96502			Lipids and lipid-like molecules	Fatty Acyls	Eicosanoids	383.142	6	8	15052.5	4112.6	11637.7	1066.85	6864.92	2973.26	3978.01	1033.5	1766.75	1699.27	3761.11	3886.78	8087.17	1754.02	5006.02	1589.78	2702.3	1670.62	1115.44	2016.34	4466.63	1417.48	2894.65	1150.91	1787.01	2018.64	2943.53	666.044	1229.25	3780.19	1576.08	2165.08	2597.12
M469T58	[M-H]-	18.beta.-glycyrrhetinic acid	0.473314	0.726412	0.231487	469.332	58.472	2.85714			Lipids and lipid-like molecules	Prenol lipids	Triterpenoids	65.307	8	9	42184	136436	144792	21256.3	53021.2	27446.3	29807.9	41729.6	39679.4	42190.3	44417.6	54355.4	115754	24093.2	22498.8	11836.7	38875	26635.2	33223.9	56791.4	27751.6	67388.4	24789.5	17914.5	51430.4	39796.8	67481	26610.2	23747.5	23161.7	42531.3	53980.8	31353.9
M317T339	[M-H]1-	18-hydroxy-5z,8z,11z,14z,16e-eicosapentaenoic acid	0.328721	0.7593	0.11761	317.197	338.603	0.526323			Lipids and lipid-like molecules	Fatty Acyls	Eicosanoids	345.143	10	10	49524.9	32474.2	11200.8	9450.7	18510.3	9412.2	12927.1	13659.8	40540	13220.7	13081.5	28090.1	19703.3	11780.6	14228.5	11053.2	11144.4	11367.4	14315.3	14059.9	13297.3	10541.5	9376.91	13741.4	12754.9	17410.7	14858.1	9664.54	15323	11759.6	19391.7	20527.9	9128.59
M503T175	[M+CH3COOH-H]-	(19r)-9-acetyl-19-hydroxy-10,14-dimethyl-20-oxopentacyclo[11.8.0.0<2,10>.0<4,9 >.0<14,19>]henicos-17-yl acetate	0.813431	0.674744	0.096171	503.302	175.116	8.56027			Lipids and lipid-like molecules	Steroids and steroid derivatives	Steroid esters	188.077	10	10	75774.5	286966	50575.9	32987.7	189758	33122.8	100220	41397.2	61134	65860.1	25174.5	87060.9	54866.6	39660	59673.9	28039.5	22136.9	25044.4	22521.5	76226.8	51323.7	91015	34901.9	37280.9	44685.4	82055.8	48915.2	18810.4	34234.4	52830.8	64711.8	68608.3	19282.2
M476T203	[M]-	1-(9z,12z-octadecadienoyl)-2-hydroxy-sn-glycero-3-phosphoethanolamine	1.89309	1.21229	0.502669	476.278	202.909	1.22906			Lipids and lipid-like molecules	Fatty Acyls	Lineolic acids and derivatives	208.668	9	10	103013	84634.8	136731	272903	102286	222150	183027	240853	37140.8	243747	228839	169388	155034	200682	98699.1	191601	364720	464239	213047	227686	328533	204807	168060	305019	468355	157531	184167	286644	163020	295975	170503	130877	231751
M363T267	[M-H-H2O]-	1a,1b-dihomoprostaglandin e1	0.138608	0.819788	0.0925176	363.239	266.572	3.05152			Lipids and lipid-like molecules	Fatty Acyls	Eicosanoids	268.21	7	8	13758	20040.5	18396.1	9508.71	24458.8	10476.9	12871.6	15711.8	23574.3	12524.9	21357.3	9202.51	21716.1	14854.9	17540.6	16976.1	13820.2	14135.3	16941.3	24578.8	7494.01	16808.1	12493.4	11821.2	20982.3	17468.2	19875.5	8803.83	18618.7	8635.09	20239.3	19386.6	6617.22
M429T72	[M-H]-	(1-acetyloxy-3-hydroxy-6,8a-dimethyl-7-oxo-3-propan-2-yl-2,3a,4,8-tetrahydro-1h-azulen-4-yl) 4-hydroxybenzoate	0.933099	1.01954	0.917824	429.195	72.027	0.0709432			Lipids and lipid-like molecules	Prenol lipids	Sesquiterpenoids	97.28	6	9	64707	101272	50008.4	131251	60414.5	87533.5	145836	121643	106213	152661	140560	194761	250490	81594.9	106503	114892	103958	91763.1	202369	90968.9	174172	92251.9	73459.1	91479.4	72076.8	138381	44471.2	105095	141122	215425	214218	97449.2	73986.6
M481T145	[M-H]-	1.alpha.-methyl-5.alpha.-androstan-3.alpha.,17.beta.-diol glucuronide	1.95299	1.03467	0.902602	481.293	144.976	3.46521						153.116	10	10	195980	225347	127934	262727	221754	318074	270133	425927	111315	262489	430987	214184	287079	718254	427205	368531	632466	670753	207509	652139	366436	247980	178128	313052	685761	326698	220550	198449	250259	287724	386492	217133	227047
M461T27	[M-H-H2O]-	1.alpha.-methyl-5.alpha.-androstan-3.alpha.-ol-17-one glucuronide	1.33466	1.11359	0.486772	461.273	26.731	0.138755						40.028	10	10	90635.5	363081	127368	247095	269216	180088	238643	179038	203030	227662	257114	375920	345743	155396	67924.6	164374	224400	232851	348299	134430	297270	345263	152079	160670	153521	245663	162055	221452	253725	287071	410613	326703	219314
M470T322	[M+C2H3O2]-	1-decanoyl-2-hydroxy-sn-glycero-3-phosphocholine	0.207576	1.1425	0.345185	470.228	322.353	3.96279			Lipids and lipid-like molecules	Glycerophospholipids	Glycerophosphocholines	336.999	7	5	2331.21	4068.09	2773.04	5167	3354.01	5608.08	4259.34	5417.16	3059.5	5584.61	3944.9	5416.62	7076.79	4071.04	5606.2	2738.58	3777.62	4615.78	3526.46	4763.06	4945.2	5658.11	4658.27	4150.24	4463.55	8647.66	2605.39	5456.42	6227.27	5372.08	9691.65	4991.69	2355.05
M213T347	[M-H]-	1-Deoxy-D-xylulose 5-phosphate	0.0482239	0.868852	0.424002	213.018	347.326	1.15619	HMDB0001213	C11437				350.682	10	9	911.511	1237.53	2932.88	1836.17	2883.84	3526.43	1998.69	2849.23	2336.94	3785.13	2935.04	5594.49	4725.91	5918.58	2389.26	2189.05	2695.39	1495.79	2554.68	2994.36	1560.82	3180.24	1645.65	2647.12	2071.4	2628.27	956.372	2922.44	2680.18	3239.52	2885.7	1832.42	4249.14
M293T33	[M-H]-	(1e,4e)-1,5-bis(4-methoxyphenyl)penta-1,4-dien-3-one	0.609802	0.995069	0.9806	293.106	33.186	0.951154			Benzenoids	Phenol ethers	Anisoles	50.105	10	10	24580.7	66516.4	33183.5	203427	43580.5	185071	112583	132532	300472	104047	164013	148938	234973	268598	109043	121773	180262	267573	158504	90352.4	214471	175580	102423	138052	299510	146954	37187	149929	225977	314126	189396	155320	121682
M792T102	[2M-H]-	1-hexadecyl lysophosphatidic acid	0.394541	0.6846	0.0432277	791.534	102.478	4.27741	HMDB0062325		Lipids and lipid-like molecules	Glycerophospholipids	Glycerophosphates	113.274	8	7	66597	37558.6	51276.5	48840.9	43574.2	61663.4	48068.2	41575.2	21506.7	62707.9	73162.5	38943.5	23133	51740.7	65986.7	31356.4	39381.1	30408.9	21019.7	60899.7	37030.8	63727	31686	29979.6	41030.5	27807.6	61701.6	55753.7	22526	37016.6	33910.9	42453.1	34659.6
M394T226	[M-H]-	1h-indazole-1-pentanoic acid, 3-[(tricyclo[3.3.1.1(3,7)]dec-1-ylamino)carbonyl]-	0.3337	1.1749	0.330642	394.223	226.064	1.5517			Organoheterocyclic compounds	Benzopyrazoles	Indazoles	230.016	10	10	8578.4	11496.8	5229.64	10401.9	7994.03	18055.5	11856.6	15765.9	3039.26	16403.4	12946.6	12328.5	7307.48	10418.6	11846.8	5553.07	11578.6	9030.05	9248.76	7030.01	12057.2	7295.28	9796.61	8295.19	6936.15	11349.2	5532.52	12082.8	9997.67	9652.75	13788.8	19051.8	10748.7
M681T227	[2M-H]-	1h-indole-1-pentanoic acid, 3-[(2,2,3,3-tetramethylcyclopropyl)carbonyl]-	0.459106	0.546227	0.215089	681.369	227.029	2.58527			Organoheterocyclic compounds	Indoles and derivatives	Indolyl carboxylic acids and derivatives	231.286	9	9	17335	50376.9	79324.3	9016.95	31738.3	4575.75	4766.9	5956.43	4635.76	17115	2479.64	11307.9	12769	9422.7	5503.04	2361.08	3927.61	6131.5	3271.37	20313.1	4970.24	14407.7	3540.46	5844.04	33318.5	5141.48	23819.8	5371.6	3321.05	13006.2	8898.98	49211.2	5242.04
M522T216	[M-H]-	1h-indole-3,5-dicarboxylic acid, 1-[3-[4-(decyloxy)phenoxy]-2-oxopropyl]-, 3-methyl ester	0.133446	0.787028	0.403108	522.24	216.406	1.03775			Organoheterocyclic compounds	Indoles and derivatives	Indolecarboxylic acids and derivatives	231.012	9	8	2873.06	4949.05	9334.12	8642.71	18101.7	14137	4212.84	5575.58	2987.28	8204.07	8475.71	5940.91	4280.9	8040.02	1729.28	4099.14	5855.17	3432.14	7238.87	6333.84	4918.81	10139.3	1213.01	3813.41	15933.3	3445.62	10463	11684.1	3531.55	13453.9	5344.05	11670.6	2484.86
M188T107	[M-H]-	1h-indole-3-propanoic acid	0.625876	0.550346	0.0875726	188.072	106.722	2.94159	HMDB0002302		Organoheterocyclic compounds	Indoles and derivatives	Indolyl carboxylic acids and derivatives	120.029	10	10	106447	30488.6	40055.7	26960.3	51776.8	34681.3	32534.4	18605.5	54515.7	35422.5	103888	48207.1	48354.3	199525	125280	27467.8	53750.6	42542.2	25737.7	96546.5	27713	43597.6	36152.8	25007.8	85215.1	17969.6	71164.1	26604.4	27624.2	41851.3	45344.4	38957	67099.8
M347T36	[M-H-CO2]-	1h-pyrano[3',4':6,7]indolizino[1,2-b]quinoline-3,14(4h,12h)-dione, 4,11-diethyl-4,9-dihydroxy-, (4s)-	0.426309	0.970959	0.860208	347.117	35.786	1.4175	HMDB0060510	C11173				38.072	7	6	26429	3861.3	25397.2	31760.5	25865.3	90854.1	18260.4	43868.1	27509.8	40189.7	42167.2	50136.1	81611.9	42925.9	40587.7	39979.4	55698.2	37206.7	89822.9	45770.8	26802.5	82386.3	35255.7	53554.3	51355.8	45444.4	39148.1	51438.9	40339.1	39018	53469.9	54595.1	29566
M584T249	[M+HCO2]-	1-o-hexadecyl-2-deoxy-2-thio-s-acetyl-sn-glyceryl-3-phosphorylcholine	0.385166	0.572171	0.11244	584.32	249.081	0.352849			Organic nitrogen compounds	Organonitrogen compounds	Quaternary ammonium salts	250.814	7	9	7979.68	10907	9615.4	12571.2	10784.6	9168.59	10149.8	4828.9	28227.6	9801.03	11430.4	8358.6	6224.03	7339.24	23556	3726.77	6649.43	3609.57	8024.75	6922.49	6461.15	7650.33	10589.3	12589.2	5009.83	3603.53	4043.31	16358.7	3233.63	6340.24	5644.38	11393.1	6155.31
M509T158	[M-H]-	1-oleoyl-2-hydroxy-sn-glycero-3-phospho-(1'-rac-glycerol)	5.00412	1.10918	0.758064	509.288	157.894	2.02679			Lipids and lipid-like molecules	Glycerophospholipids	Glycerophosphoglycerols	177.403	10	10	1.00558e+06	847407	285126	1.00423e+06	527374	1.38445e+06	782360	2.07544e+06	363297	1.29824e+06	2.27677e+06	911347	2.398e+06	2.64317e+06	603266	1.09814e+06	1.91367e+06	2.99553e+06	1.56739e+06	2.02727e+06	2.27117e+06	1.46164e+06	692792	1.17713e+06	2.7806e+06	2.33509e+06	658200	1.03871e+06	1.34182e+06	2.24977e+06	3.07111e+06	1.00962e+06	836049
M417T56	[M-H-H2O]-	1-oleoyl-l-.alpha.-lysophosphatidic acid	0.509877	1.11902	0.518315	417.241	55.6475	1.89329			Lipids and lipid-like molecules	Glycerophospholipids	Glycerophosphates	66.322	9	8	37108	19946	15807.7	37236.4	29064.4	45227.7	45589.5	38930.7	10268	48083.2	43890	108139	25031.1	31034.8	25291.3	32602.6	33213	34403.1	37608.4	41401.2	22589.7	40795	15489.1	37333.1	48341.6	28321.1	30362.9	32991.3	54577.4	39132.7	29959.9	23134.2	34194
M471T215	[M+HCO2]-	1-o-octyl-2-o-(n-methylcarbamoyl)-sn-glyceryl-3-phosphorylcholine	2.02608	1.55544	0.186379	471.243	215.185	0.800502			Lipids and lipid-like molecules	Glycerophospholipids	Glycerophosphocholines	228.971	10	10	63099.2	447711	102996	575497	239860	272778	503877	92320.6	405524	754918	374647	684519	498817	62350.2	157475	426467	78364.1	33163.9	622692	39047.6	642680	1.11411e+06	84052.4	157057	35408.2	217137	29995.5	440213	196905	937125	1.01204e+06	315892	75152.4
M817T48	[M+Cl]-	1-palmitoyl-2-arachidonoyl-sn-glycero-3-phosphocholine	0.0726438	0.884279	0.40046	816.534	47.855	0.496753	HMDB0007982		Lipids and lipid-like molecules	Glycerophospholipids	Glycerophosphocholines	54.031	8	10	27392.1	18997.4	17336.2	51845.5	20376.7	49894.7	59479.7	48118.1	66469.8	59142.9	40054.4	58324.8	61155	43812.8	62393.6	36124.5	52064.5	49706.9	45201.3	32443	47480.7	51598.7	20309.7	39185.6	57785.5	107205	18182.1	47150.5	39036.1	48110.9	41630.6	43879.3	40803.2
M783T209	[M-H]-	1-palmitoyl-2-arachidonoyl-sn-glycero-3-phosphoserine	0.0628542	0.932821	0.672888	782.521	209.472	1.19329	HMDB0012361		Lipids and lipid-like molecules	Glycerophospholipids	Glycerophosphoserines	215.137	7	5	7457.15	4263.55	2688.12	4762.94	2272.07	1107.53	5009.65	4135.69	7229.66	2886.57	2570.07	4483.24	4372.42	2899.95	4185.17	2152.46	1549.52	3920.22	1312.83	3827.86	5793.89	3050.1	2449.45	3737.15	3576.05	3427.22	4563.68	3723.6	4437.61	2561.85	2429.15	3192	1729.92
M483T35_1	[M-H]-	1-palmitoyl-2-hydroxy-sn-glycero-3-phospho-(1'-rac-glycerol)	2.20523	1.03001	0.919214	483.278	35.373	2.61595			Lipids and lipid-like molecules	Glycerophospholipids	Glycerophosphoglycerols	47.204	10	10	234629	474578	198694	772112	301705	485911	753197	843190	95192.4	720362	649049	874858	1.48902e+06	414513	456088	517928	524039	429766	1.00224e+06	390519	948508	692493	102648	509318	419521	794238	248878	713659	968717	969532	1.14718e+06	599783	456473
M723T55	[M+HCO2]-	1-palmitoyl-2-lauroyl-sn-glycero-3-phosphorylcholine	1.38328	0.612288	0.326761	722.506	54.579	1.43379			Lipids and lipid-like molecules	Glycerophospholipids	Glycerophosphocholines	65.97	10	6	62463.1	276923	26724.8	47955.1	24135.3	34022.2	382189	496173	540792	53216.3	55246.5	81238.3	138136	32214.5	80960.9	139339	51857.9	26698.7	49349.9	35927.1	155244	29466.3	31189.9	67973.1	28118	93044.1	29646.1	50817.3	181989	148887	94158.5	30217.3	41897
M746T51	[M-H]-	1-palmitoyl-2-linoleoyl-sn-glycero-3-phospho-(1'-rac-glycerol)	0.804469	1.0133	0.941814	745.504	50.503	1.68755			Lipids and lipid-like molecules	Glycerophospholipids	Glycerophosphoglycerols	59.493	10	8	83090.7	44318.4	65293.5	71996.1	57731.6	72367.5	130179	84593.5	26123.6	101142	80867.1	36889.9	43762.4	88352.6	61482.2	74987.7	77804.2	84497.6	55972.8	88727.4	78611.1	91303.4	30717.2	70153.7	117448	68944.5	89239.4	77653.4	62155.8	47110.8	58351.4	57762.8	62657.2
M748T36	[M-H]-	1-palmitoyl-2-oleoyl-phosphatidylglycerol	2.39044	0.977391	0.962818	747.519	35.682	0.936506			Lipids and lipid-like molecules	Glycerophospholipids	Glycerophosphoglycerols	51.221	10	9	278178	249307	657067	425872	580293	550179	218638	311932	73289.3	260803	854303	64623.4	205628	1.69991e+06	237452	236458	384976	530974	271327	976770	363755	373213	179948	170312	2.02142e+06	366214	602341	271137	179677	529674	381159	338460	199699
M811T209	[M-H]-	1-stearoyl-2-arachidonoyl-sn-glycero-3-phosphoserine	0.118543	0.894365	0.641241	810.549	208.581	7.60442	HMDB0012383		Lipids and lipid-like molecules	Glycerophospholipids	Glycerophosphoserines	214.387	6	7	14081.8	5090.19	3746.95	2654.93	3144.75	3753.35	8613.05	6432.69	11149.6	3472.64	3143.68	1191.84	3411.04	1921.18	5756.05	3299.64	3810.42	3572.37	2601.46	4071.81	4628.99	2575.56	2652.84	2857.79	4105.55	6090.35	4220.72	2013.4	6972.35	2445.7	4625.33	3416.51	2186.37
M480T200	[M-H]-	1-stearoyl-2-hydroxy-sn-glycero-3-phosphoethanolamine	1.57937	1.1399	0.489794	480.309	200.188	3.31976	HMDB0011130		Lipids and lipid-like molecules	Glycerophospholipids	Glycerophosphoethanolamines	205.797	10	10	106135	300617	111129	434102	250364	484723	457032	367457	287996	491493	631699	562255	270155	337892	324397	269514	400828	474310	867484	402517	340797	593825	237373	283173	427010	228575	167285	475821	237178	421334	307623	384862	385063
M401T33	[M-H]-	22beta-Hydroxycholesterol	0.632237	0.879702	0.471332	401.341	33.07	4.17283		C05502	Lipids and lipid-like molecules	Steroids and steroid derivatives	Bile acids, alcohols and derivatives	43.184	8	7	127386	187059	299708	104548	254703	122945	80181.3	83077.8	227160	154749	101616	74034.8	77918.6	149194	98740.5	83032.6	95239.2	102511	135440	133315	125841	195034	135206	75721.3	230417	65248.7	233957	145240	88831	110691	98238.1	105908	143991
M159T79	[M-H]-	2,2-dimethylglutaric acid	0.789679	0.565285	0.0363317	159.066	79.281	2.47598	HMDB0061676		Lipids and lipid-like molecules	Fatty Acyls	Fatty acids and conjugates	100.161	10	10	125509	19774.3	93497.1	33662.5	95389.5	28251.9	20036.2	32467.6	28327.4	29663.1	22248.4	18902.1	11724.1	38465.2	56560.8	31130.2	24975.6	29893.7	28757.9	41651.5	29579.5	29498.2	17730.8	25351.8	55970.7	26917.9	57300.4	49419.4	23846.5	31305.2	23831.4	45508.3	21651.7
M213T19	[M-H]-	2,4-dihydroxybenzophenone	0.194089	1.0944	0.27042	213.056	19.4595	1.39265		C14215	Benzenoids	Benzene and substituted derivatives	Benzophenones	21.762	7	10	5315.43	4355.93	5027.51	7314.18	4529.16	7357.86	5018.65	8319.17	4113.75	7676.04	7021.84	4780.84	6109.04	6280.25	5609.53	5280.85	6744.85	5809.13	7280.24	6524.37	7040.88	8646.98	4358.2	4786.03	6337.42	6563.16	6064.17	5020.88	5555.62	6647	7276.09	5362.29	7190.48
M555T153	[2M-H]-	2,5,7,8-tetramethyl-2-(.beta.-carboxyethyl)-6-hydroxychroman	0.941618	1.07515	0.838757	555.274	152.897	1.93377			Organoheterocyclic compounds	Benzopyrans	1-benzopyrans	161.986	10	10	20033.1	282791	11456.8	241775	174681	114868	448734	132744	76693.8	495370	243131	1.49967e+06	427360	118146	172664	108510	128576	120827	406508	219974	209471	418547	71260.7	90699	106879	101865	45180.8	100001	115687	165811	381000	403350	131739
M628T311	[M+Cl]-	2-(5-oxovaleryl)phosphatidylcholine	0.0915472	0.796962	0.546993	628.331	310.589	6.06066e-05			Lipids and lipid-like molecules	Glycerophospholipids	Glycerophosphocholines	333.076	8	6	2340.22	2519.55	2990.13	1294.72	5811.85	5119.27	2595.03	5057.88	1732.48	4038.07	3200.86	3125.18	2673.39	3494.6	3990.43	2356.24	2871.2	6765.34	5002.29	6649.1	3777.71	2189.32	1480.03	3170.57	5515.51	2841.19	2968.27	6587.51	3020.94	4316.26	7711.25	4300.14	2132.17
M220T669	[M-H-CH3]-	2,6-di-tert-butyl-4-methoxyphenol	0.146538	1.13317	0.660115	220.147	668.894	2.46954			Benzenoids	Phenols	Methoxyphenols	695.869	8	9	3164.19	4165.4	5420.22	3191.34	2028.69	1534.98	3588.13	5062	5695.47	4109.33	5388.04	4935.85	4431.08	14495.3	1984.68	5935.65	4618.44	2692.02	4556.92	4609.02	3756.66	4074.11	3761.42	2102.27	5326.09	8609.18	7652.46	26339.8	2686.48	3245.73	4584.86	4868.94	4933.61
M202T309	[M-H]-	2,8-quinolinediol	0.503047	0.735712	0.162596	202.072	309.343	2.86053			Organoheterocyclic compounds	Quinolines and derivatives	Quinolones and derivatives	315.714	10	10	49076	43746.8	38159.9	53662.1	95185.4	52568.2	29756.5	54607.4	31269.5	38488	31503	55139.6	31754	53248.7	56757.7	38128.3	34227.4	53939	22928.4	85476.5	31492.3	31728.8	61436.6	31001.7	82348.8	36324.6	33083.2	40529.4	24420.2	31581.5	35761.7	43275.4	27455.7
M527T171_2	[2M-H]-	2-cis-4-trans-abscisic acid	3.45765	1.22722	0.406664	527.269	171.289	0.20798		C06082	Lipids and lipid-like molecules	Prenol lipids	Sesquiterpenoids	184.182	10	10	332854	537270	182240	1.18944e+06	212834	518100	1.00121e+06	1.20655e+06	776861	1.12665e+06	807304	1.12495e+06	1.51071e+06	519846	758885	603991	1.17496e+06	1.31478e+06	1.46602e+06	668090	2.21193e+06	1.03473e+06	519985	959265	634228	1.83549e+06	198631	1.33241e+06	1.20874e+06	1.43723e+06	1.61461e+06	481457	578746
M483T331	[M-H]-	2-despiperidyl-2-(5-carboxypentylamine)repaglinide	0.045472	1.03635	0.838457	483.257	330.802	1.43767			Organic acids and derivatives	Carboxylic acids and derivatives	Amino acids, peptides, and analogues	338.066	6	5	9412.52	4784.27	4993.81	2477.17	5486.4	8939.42	2534.47	1200.57	6024.39	3608.47	6046.08	6137.5	4258.29	1428.25	3890.2	3866.54	6155.56	4999.62	1678.58	3552.04	7675.74	6468.67	3638.35	5771.79	6474.04	5004.34	4359.7	2488.39	4861.93	7110.06	6281.6	2819.9	2122.3
M601T437	[M+C2F3O2]-	2'-fucosyllactose	0.0531767	0.796424	0.248181	601.163	436.511	2.77419			Organic oxygen compounds	Organooxygen compounds	Carbohydrates and carbohydrate conjugates	440.603	7	4	1717	1461.07	3371.84	2559.5	2467.83	1740.58	2673.04	2386.09	2094.77	3799.61	2993.76	3855.5	1063.18	2772.53	5595.52	1155.99	4069.18	2575.01	2103.98	4657.21	3745.34	1850.39	2617.82	4573.54	2848.75	1649.2	2870.42	4679.5	1203.1	6301.23	2806.4	4244.5	4295.25
M117T155	[M-H]-	2-hydroxy-2-methylbutyric acid	0.968798	0.637669	0.281189	117.055	154.864	1.18169	HMDB0001987		Lipids and lipid-like molecules	Fatty Acyls	Fatty acids and conjugates	169.923	10	10	104545	675129	997267	1.59863e+06	798372	231033	879690	948234	222497	429603	713901	654822	56723.8	343671	701576	226481	212468	448416	585701	306297	981162	362847	280618	530282	233647	141984	818717	910881	242791	975664	43655.6	1.85382e+06	481771
M117T262	[M-H]-	2-hydroxy-3-methylbutyric acid	0.290896	0.814218	0.40292	117.055	262.153	0.852094	HMDB0000407		Lipids and lipid-like molecules	Fatty Acyls	Fatty acids and conjugates	264.16	10	10	34318	29984.7	52544.9	49574	28517.9	59817.7	35556	76689	31765.6	29238.6	23374	58471.2	7299.17	75229.1	20549.3	19715.3	64109.8	56627	32082.3	39116.1	64251.7	42268.1	25209.7	16441.7	70521.8	21911.3	29169.7	40074.7	32827.9	32925	24550	82024.9	43271.1
M186T229_1	[M-H]-	2-hydroxy-6-methylquinoline-3-carbaldehyde	0.177708	0.860152	0.831518	186.045	228.511	3.38406			Organoheterocyclic compounds	Quinolines and derivatives	Quinolones and derivatives	238.334	10	6	2749.52	27053.3	2344.78	185616	2452.41	14739.3	177238	41287.9	3145.88	29851.7	61006.1	4404.67	2239.3	10318.3	38409.8	12931.5	8459.19	10253.7	30316.3	3698.15	145616	9781.3	26758	81777.4	2060.73	1749.69	2501.78	231335	4476.55	166021	5354.54	18564.3	23366
M113T345	[M-H-CH2O3]-	2-isopropylmalic acid	0.0958518	0.988905	0.971281	113.072	345.091	0.0732163	HMDB0000402	C02504	Lipids and lipid-like molecules	Fatty Acyls	Fatty acids and conjugates	350.682	8	10	1648.72	604.653	2189.95	2453.84	1259.54	1537.43	933.169	4371.75	3602.26	1709.78	2788.06	1200.47	1308.88	8298.37	2991.48	1975.07	1847.96	2275.06	919.825	5800.28	2823.3	2106.81	1505.82	2457.61	919.013	1818.97	817.921	1288.28	1564.22	1476.84	1105.13	1537.96	1076.84
M129T58_2	[M-H]-	2-ketohexanoic acid	4.92719	0.578867	0.155728	129.055	58.117	4.15545	HMDB0001864	C00902	Organic acids and derivatives	Keto acids and derivatives	Medium-chain keto acids and derivatives	69.66	10	10	1.19293e+06	1.6878e+06	1.94987e+06	4.34128e+06	7.1498e+06	4.55737e+06	794440	4.16434e+06	639284	1.35612e+06	1.331e+06	971269	381302	3.30539e+06	2.97897e+06	1.71561e+06	2.15572e+06	2.85925e+06	1.82641e+06	3.66039e+06	1.91684e+06	3.10772e+06	1.83391e+06	516331	3.81828e+06	751112	1.28222e+06	2.29938e+06	604357	1.75963e+06	901140	2.66977e+06	1.74776e+06
M193T305	[M-H]-	2-keto-l-gulonic acid	0.0976449	0.76422	0.258214	193.036	305.421	1.63044		C15673	Organic oxygen compounds	Organooxygen compounds	Carbohydrates and carbohydrate conjugates	307.018	7	5	3155.49	2542.66	4264.48	9574.13	4210.94	8302.71	6951.64	10735.2	3021.28	2879.32	3146.36	3841.5	2391.95	5642.44	9137.38	6041	6561.8	13386.5	3792.03	7217.91	4210.06	2495.57	7831.59	5205.45	4520.75	2335.5	2558.67	13881.1	3490.39	4112.8	2955.35	3097.58	4700.62
M750T37	[M+Cl]-	2-linoleoyl-1-palmitoyl-sn-glycero-3-phosphoethanolamine	0.966215	1.06811	0.605703	750.486	36.944	2.22339	HMDB0008928		Lipids and lipid-like molecules	Glycerophospholipids	Glycerophosphoethanolamines	37.831	4	7	61270.6	82264	59389.2	185137	73919.2	234751	159783	172890	185184	195351	167570	120040	223497	159933	118951	123007	160700	176993	169496	68860	149250	140318	144939	174759	212977	174267	40059.8	160527	159484	158532	120451	129699	172078
M117T240	[M-H]-	2-methyl-3-hydroxybutyric acid	0.215045	0.832779	0.415078	117.055	239.973	0.942433	HMDB0000354		Lipids and lipid-like molecules	Fatty Acyls	Fatty acids and conjugates	241.536	3	5	27834.8	7005.68	11327.5	6435.89	15924.3	7954.25	5048.81	10930.6	12544.8	5829.68	11541.6	7644.71	7665.11	19051.3	9122.42	9238.83	13353	17011.5	6076.52	21970.1	6213.89	6659.09	8419.65	4240.92	23292.7	4832.33	14513	5209.42	4977.45	6062.36	10880.4	13483.2	9389.94
M194T91	[M-H]-	2-(n-morpholino)ethanesulfonic acid	9.30306	0.200314	0.297165	194.049	90.975	1.94959			Organoheterocyclic compounds	Oxazinanes	Morpholines	104.618	10	10	1.72875e+06	532288	6.67001e+06	477212	1.00147e+06	126344	648120	233504	3.13964e+06	284713	5.13504e+06	8.96044e+06	123661	868807	3.56765e+06	222753	220983	175219	2.03049e+06	878261	985150	1.74183e+06	822450	95911.3	212458	53573.2	2.98422e+06	178108	154862	656607	6.90949e+06	6.02739e+07	242306
M761T36_1	[M-H]-	2-oleoyl-1-palmitoyl-sn-glycero-3-phosphoserine	1.09589	0.693096	0.320915	760.522	36.083	0.399448	HMDB0012357		Lipids and lipid-like molecules	Glycerophospholipids	Glycerophosphoserines	37.401	8	9	53717.6	198466	58761.1	90258.5	80415.1	110267	206725	284296	574819	96175.1	105118	100652	174198	126402	54927	105984	96037.1	117843	91360.4	177851	115731	79811.9	61829.7	98792.4	172400	88049.4	99228.6	101052	138458	122286	102613	92542.6	97124.9
M190T219	[M-H]-	(2-oxo-2,3-dihydro-1h-indol-3-yl)acetic acid	5.04802	1.39951	0.104734	190.051	218.661	0.0119655	HMDB0035514	C22202	Organoheterocyclic compounds	Indoles and derivatives	Indolyl carboxylic acids and derivatives	224.616	10	10	108022	250385	75845.2	1.78386e+06	236880	2.0751e+06	1.40044e+06	1.23614e+06	501872	1.35227e+06	1.68007e+06	1.00233e+06	500410	1.00183e+06	1.45507e+06	1.77859e+06	2.08244e+06	1.93953e+06	992196	995229	1.65006e+06	682948	1.71886e+06	1.72067e+06	1.05397e+06	246771	147781	1.80004e+06	1.19353e+06	1.0568e+06	1.77182e+06	1.18607e+06	1.27276e+06
M159T217	[M-H]-	2-oxoadipic acid	0.274246	0.900029	0.412639	159.03	217.202	1.86357	HMDB0000225	C00322	Organic acids and derivatives	Keto acids and derivatives	Medium-chain keto acids and derivatives	232.007	10	10	35549.2	27511.7	39063.7	55261.8	33079.4	61104.7	37114.1	52719.4	56803.7	64447.9	81058.9	29231.6	39331.5	48807.3	62519.1	47623.4	52447.8	46562.3	35480	55144	53378.4	29598.2	54315.5	46007.4	44093	27152.8	24710.6	50675.2	36224.2	40739.1	44440.7	61348.8	41753.5
M697T214	[M-H]-	[(2r,3s,4s,5r,6r)-6-[1,7-bis(3,4-dihydroxyphenyl)-5-oxoheptan-3-yl]oxy-3,4,5-trihydroxyoxan-2-yl]methyl (e)-3-(3,4-dimethoxyphenyl)prop-2-enoate	0.127114	1.00957	0.961517	697.236	213.865	4.55087			Phenylpropanoids and polyketides	Diarylheptanoids	Linear diarylheptanoids	217.957	9	9	1571.49	2642.08	2903.03	4861.9	3734.13	5370.31	3187.04	3655.05	2493.05	3025.38	3286.21	3485.18	2435.39	3967.88	3744.91	5141.82	4425.31	5374.68	2411.48	3658.52	3089.14	1847.65	4062.89	2942.79	8214.2	2347.23	2594.62	4822.58	2202.81	3324.82	3817.93	4649.21	2799.75
M593T270	[M-H]-	(2r,3s,4s,5r,6r)-6-[1,7-bis(4-hydroxyphenyl)heptan-3-yloxy]-5-[(2s,3r,4r)-3,4-dihydroxy-4-(hydroxymethyl)oxolan-2-yl]oxy-2-(hydroxymethyl)oxane-3,4-diol	0.108177	0.821328	0.24303	593.251	270.312	2.5011			Phenylpropanoids and polyketides	Diarylheptanoids	Linear diarylheptanoids	272.382	8	8	3127.49	5967.75	2198.07	3009.69	3453.99	3184.94	2526.99	2863.33	2659.89	3584.51	1885.1	4074.5	2741.08	3908.61	6494.32	2815.67	1743.02	1683.91	715.323	2726.34	3117.16	1679.33	3590.28	2602.64	4065.54	2633.54	1928.1	2928.44	1962.13	2723.73	1817.01	3501.18	1340.48
M235T55	[M-H]-	(2r)-8-ethyl-7-hydroxy-5-methoxy-2-methyl-2,3-dihydrochromen-4-one	0.178152	0.848987	0.130087	235.101	54.928	5.57989			Organoheterocyclic compounds	Benzopyrans	1-benzopyrans	66.602	10	10	129421	116642	126580	96240.2	101499	76750.6	79168.9	77065.2	73665.9	92455.4	94747.5	100396	102957	86888.5	114791	86460	87176.2	81693.9	96243.2	107254	97334.2	86432.8	72875.2	88826.6	45924.5	85617.4	135141	69636.3	80164.5	97160	134780	118222	70547.7
M525T49_2	[M+FA-H]-	(2s,3r,5r,10r,13r,14s,17s)-2,3,14-trihydroxy-10,13-dimethyl-17-[(2r,3r)-2,3,6-trihydroxy-6-methylheptan-2-yl]-2,3,4,5,9,11,12,15,16,17-decahydro-1h-cyclopenta[a]phenanthren-6-one	0.898509	1.19864	0.391378	525.288	49.165	3.73307			Lipids and lipid-like molecules	Steroids and steroid derivatives	Bile acids, alcohols and derivatives	51.078	7	6	58297.4	136092	46169.1	96107.9	84568.1	101533	104095	167960	53303.2	191044	96072.6	136462	122314	67705.2	87841.4	50221.5	129218	72329.5	115944	76174.8	156304	115703	54551.6	81997.3	64486.5	56861.2	41155.1	119706	100843	115250	245006	84117.3	55824.8
M493T144_2	[M-H]-	(2s,3r,5r,10r,13r,14s,17s)-2,3,14-trihydroxy-10,13-dimethyl-17-[(2r,3r,5r)-2,3,6-trihydroxy-5,6-dimethylheptan-2-yl]-2,3,4,5,9,11,12,15,16,17-decahydro-1h-cyclopenta[a]phenanthren-6-one	6.04026	0.910167	0.755664	493.293	144.493	1.6924			Lipids and lipid-like molecules	Steroids and steroid derivatives	Bile acids, alcohols and derivatives	151.756	10	10	1.55679e+06	5.0038e+06	1.71853e+06	3.6568e+06	3.01774e+06	5.47395e+06	4.12685e+06	5.80578e+06	1.59277e+06	4.24215e+06	1.05167e+07	4.55728e+06	3.83628e+06	1.188e+07	6.33493e+06	4.72175e+06	6.58915e+06	7.26699e+06	4.85974e+06	9.60941e+06	7.46261e+06	5.35227e+06	2.25046e+06	3.1025e+06	9.65725e+06	5.26066e+06	3.29401e+06	3.64682e+06	3.78651e+06	5.57467e+06	6.95487e+06	3.93791e+06	3.24198e+06
M506T48	[M-H]-	3,15-dibenzyl-1,4,12-trimethyl-1,4,7,10,13-pentazacyclopentadecane-2,5,8,11,14-pentone	0.322726	2.05385	0.452992	506.259	47.5075	0.895909						66.8	9	8	16075.2	118301	30790.9	30928.4	23647.5	41809.2	30426.2	26325.9	9500.42	24500	66298.2	166890	27314.6	15093	27254.5	4718.43	8065.36	9041.22	92027.6	19442.1	23937.1	32160.7	17754.7	6949.13	10769.8	15865.5	18362.4	26548	24115.6	48552.5	39312.7	84046.4	29391.8
M159T229	[M-H]-	3,3-dimethylglutaric acid	0.119455	0.962765	0.861024	159.066	228.882	2.96491	HMDB0002441		Lipids and lipid-like molecules	Fatty Acyls	Fatty acids and conjugates	232.476	7	7	15943.8	4580.09	7485.23	17372.2	6273.36	8794.11	5029.12	9635.55	6438.42	6788.59	11698.4	5913.96	3301.28	9207.34	10397.2	7900.62	10323.7	7580.47	9170.29	12154.2	8687.31	8208.26	11434.1	7179.95	9417.5	4044.41	6094.62	6734.78	6055.43	7037.79	7745.31	20675.3	7117.91
M165T158_2	[M-H]-	3-(3-Hydroxyphenyl)propanoic acid	4.54144	1.22812	0.416215	165.056	157.969	2.01033	HMDB0000375	C11457				162.125	10	9	595336	1.01581e+06	3.91214e+06	2.06138e+06	706831	2.7483e+06	1.52369e+06	2.18133e+06	146553	927575	2.17922e+06	1.5526e+06	841293	1.49795e+06	934519	2.14394e+06	2.31227e+06	2.78269e+06	1.3603e+06	1.25913e+06	3.20118e+06	2.18817e+06	2.4683e+06	1.86048e+06	1.46559e+06	724778	1.21701e+06	2.12363e+06	971611	2.0081e+06	685568	1.25743e+06	1.86175e+06
M181T357	[M-H]-	3,4-dihydroxyhydrocinnamic acid	0.151222	1.78181	0.491178	181.009	357.368	1.6555	HMDB0000423	C10447				361.771	10	10	84801.4	8368.13	31663.7	6645.31	25894.6	9538.59	28105.6	11382	20938.6	16029	36767.2	14099.5	16666.1	17272.5	28392.8	22694.3	7317.73	7896.87	7952.25	24927.1	13985.8	12346.6	28455.9	8455.6	19753.8	12381.6	13069.5	5692.2	8041.4	6431.61	28428.3	7595.53	15514.6
M165T149	[M-H-H2O]-	3,4-dihydroxymandelic acid	0.558415	0.724157	0.124982	165.022	148.873	9.32722	HMDB0001866	C05580	Benzenoids	Phenols	Benzenediols	157.685	10	10	178334	39886.5	32324.9	47144.6	63454.8	45936.8	29373.1	45970	50959.5	46740.5	36812.1	43933.2	99801.4	39612.4	66047.4	40901.8	50071.5	39705	37769.4	27324.2	51001	17137	11595.5	43762.4	31801.9	40711.8	37313.7	42628.7	51870.7	30002.8	106144	36756.2	26962.9
M180T66	[M-H]-	3,4-dihydroxymethamphetamine	0.131026	0.856525	0.457292	180.114	65.97	0.941701			Benzenoids	Benzene and substituted derivatives	Phenethylamines	82.348	10	9	5896.95	6656.3	11893.2	6480.52	6436.74	21995.9	6973.2	17979.9	9819.88	10480.3	17182.2	12001.7	7826.15	13990	21545.8	12181	15014.5	6001.56	5611.83	19701.1	18337.2	4638.75	39694	14779.2	8875.3	5088.45	9161.46	17126.8	11545.4	13729.2	16704.6	19873	24067.5
M203T190	[M-H]-	3,5-dihydroxydecanoic acid	0.32744	0.710394	0.0357407	203.129	190.334	0.276447			Organic acids and derivatives	Hydroxy acids and derivatives	Medium-chain hydroxy acids and derivatives	196.088	6	7	34100.6	9745.24	22667.2	15772.4	19029.2	10502.8	17440.3	12834.6	10762.6	12129.3	14233.9	19215	14521.2	22044.4	17783.8	12261.3	14967.9	17556.4	11056.9	27222.5	14679.1	11770.5	14624.3	8260.41	23164.6	8624.61	22268.1	10646.8	7697.82	12693	11945.3	21787.3	11176.4
M255T34_2	[M-H]-	3-(5-phenylthiophen-2-yl)prop-2-ynyl acetate	1.3601	1.30932	0.237147	255.034	34.053	1.22569			Organoheterocyclic compounds	Thiophenes	2,5-disubstituted thiophenes	49.16	10	10	12854.8	251595	40679.9	101797	21284.4	233328	83754.9	107299	38967.9	84918.9	121610	53806.6	114769	100860	95579.4	125887	126841	150091	128708	58495	176260	57843.6	215971	169127	38030.6	83548.7	11536	161608	153994	100908	180083	119325	112211
M539T58_1	[M+Cl]-	3.alpha.,4.beta.-galactotriose	0.0256955	0.738485	0.277029	539.124	57.904	3.73131			Organic oxygen compounds	Organooxygen compounds	Carbohydrates and carbohydrate conjugates	67.702	9	8	7649.22	4942.08	8305.09	7415.57	5369.89	4771.57	13795.4	9689.99	3301.65	11304	10078.9	8972.77	8145.95	15236.3	20424.9	11871.1	11401.1	4445.98	4353.21	7006.38	8602.14	11646.1	17395.6	11832.1	7223.96	7536.3	2133.38	3294.85	8651.82	4129.99	9908.2	9335.76	6805.41
M387T89	[M-H-H2O]-	3.alpha.,7.alpha.-dihydroxy-12-oxocholanoic acid	7.94127	0.626832	0.182917	387.254	89.161	0.88357	HMDB0000400		Lipids and lipid-like molecules	Steroids and steroid derivatives	Bile acids, alcohols and derivatives	117.088	10	10	1.24674e+07	5.02189e+06	7.47615e+06	4.08232e+06	5.01876e+06	3.02503e+06	1.75509e+06	3.1322e+06	5.58611e+06	598261	3.26152e+06	1.35278e+06	1.19608e+06	4.93274e+06	6.62545e+06	1.04661e+06	2.9303e+06	4.56785e+06	826575	6.58772e+06	2.90554e+06	1.51792e+06	4.46191e+06	1.04743e+06	9.05805e+06	1.12387e+06	1.41749e+07	1.66134e+06	693990	1.64745e+06	1.35731e+06	3.39243e+06	2.9332e+06
M290T305	[M-H-C14H25O11N]-	3'-.alpha.-sialyl-n-acetyllactosamine	0.190697	0.730372	0.0358016	290.088	305.342	2.06319			Organic oxygen compounds	Organooxygen compounds	Carbohydrates and carbohydrate conjugates	307.018	6	5	11419.7	9107.84	13064	22327.1	12814.3	30071.8	13181.9	14772.4	17065.4	12343.9	13955.7	12439.3	7241.28	17596.9	17323.6	13598.1	10494.7	15220.5	10174.1	27134	10074.8	9881.9	20003.6	6868.31	21145.8	8440.04	9010.17	15382	10996.1	13480.8	10237.6	14309.1	14209.9
M264T48	[M-H]-	3-amino-2-(4-chlorophenyl)-2-hydroxypropanesulfonic acid	1.63766	0.434928	0.164887	264.001	48.496	0.197649			Benzenoids	Benzene and substituted derivatives	Halobenzenes	50.105	5	6	715682	58948.4	248466	12101.1	155325	153579	211380	161699	34358.5	96585.5	285744	110432	139455	64300.9	824644	59361.3	300112	131958	141248	261432	171018	101607	50959.2	25547.9	11256.9	95813.7	48020.5	211139	154721	46872.7	196938	106535	18223.6
M116T387	[M-H]-	3-aminopentanoic acid	0.297823	0.70925	0.300046	116.072	386.734	2.66101			Organic acids and derivatives	Carboxylic acids and derivatives	Amino acids, peptides, and analogues	389.021	10	10	30811.8	119850	98190.3	270113	64877.1	86643.8	102534	94984.2	48520.3	75108.8	131086	287538	14116.5	118780	43828.5	86046.7	66745.2	103543	170639	108996	91486.8	199529	30917.9	11330.2	131403	10514.9	69634.5	195708	20621.2	182515	36550.8	224011	100611
M108T139	[M-H-CO2]-	3-aminosalicylic acid	0.466751	0.577457	0.0149211	108.045	139.378	2.69376	HMDB0001972		Benzenoids	Benzene and substituted derivatives	Benzoic acids and derivatives	146.655	9	9	66922	13487.9	50226.2	24412.1	35343.8	35232	24602.5	30181.7	16749.4	21915.5	23662.8	21783.9	9521.69	43714.4	40111.5	36370.2	16595.8	17852.1	14400.4	35505.7	19029.4	30887.5	14254.1	18144.6	37346.3	12298.4	33910.6	26789.8	17634.5	25635.9	18410.9	38723	28412.9
M431T103_2	[M-H]-	3.beta.,7.alpha.-dihydroxy-5-cholestenoic acid	0.427295	0.744411	0.342316	431.316	102.7	1.15433		C17335	Lipids and lipid-like molecules	Steroids and steroid derivatives	Bile acids, alcohols and derivatives	106.375	9	7	31210.3	62308.1	40926.6	31602	61734.6	41072.2	126040	52503.8	50515.5	194439	102195	200483	75194	76914.6	148704	78305.5	54815.6	25126.4	64054.5	146631	81513.4	77405.4	115054	60614.4	25376.3	57624.7	28464.7	62491.2	57602.5	88024.5	144057	62020.3	45204.3
M236T55	[M-H]-	3-(cyclohexylamino)-2-hydroxy-1-propanesulfonic acid	0.786077	0.759847	0.607439	236.098	55.374	7.75153			Organic nitrogen compounds	Organonitrogen compounds	Cyclohexylamines	71.631	8	9	131987	17282.4	137070	7680.92	18590.6	67206.4	22099.1	57488.5	101049	18453.4	67894	6805.81	10589.7	17596.4	49305.8	17987.9	12259.7	15978.4	10434.8	22168.5	61475.1	8579.37	4896.65	59374.5	50809.6	80158.9	101213	61747.4	60285.2	57191.3	83903	23274.8	6020.54
M921T241	[M-H]-	3-(galactosyl(1-2) glucuronyl)-22-ddmp soyasapogenol b	0.0842288	1.0043	0.981345	921.488	241.466	0.222383			Lipids and lipid-like molecules	Prenol lipids	Terpene glycosides	243.293	6	6	1965.41	2846.46	1180.49	3092.16	1475.16	1801.64	2185.66	1380.81	1396.4	3754.89	2265.47	3398.61	4418.95	4178.99	2188.73	3486.33	2278.09	1247.64	2068.69	1908.12	2247	7643.63	2379.38	1949.68	5136.14	4656.11	1948.79	2883.13	1961.1	5221.47	2638.78	3501.16	1396.21
M161T389_2	[M-H]-	3-hydroxy-3-methylglutaric acid	0.924198	1.0147	0.955042	161.046	389.477	1.514	HMDB0000355	C03761	Lipids and lipid-like molecules	Fatty Acyls	Fatty acids and conjugates	393.765	10	8	123722	41801.7	72766.2	434146	55944	324949	103784	217000	32583.8	355688	87340.7	217221	34447.6	141274	144635	218694	117911	401980	73149.2	753709	139499	43832.6	241244	131847	172054	48217	48819.7	286769	86163.6	215431	102556	41585.3	123263
M103T394	[M-H]-	3-hydroxybutyric acid	0.179878	0.609725	0.00356374	103.04	393.918	2.13123	HMDB0000357	C01089	Organic acids and derivatives	Hydroxy acids and derivatives	Beta hydroxy acids and derivatives	397.189	8	8	3983.25	2576.99	6066.83	3261.78	2558.24	2301.92	2065.5	1937.38	3071.99	2088.8	1581.33	2527.27	2382.48	3072.01	3318.12	1847.11	2046.88	1618.91	1264.12	1870.04	2059.73	1834.7	1568.93	1414.3	2804.06	1993.56	3200.89	1037.07	1299.43	2253.7	1097.9	3298.86	1600.31
M159T133	[M-H]-	3-hydroxyoctanoic acid	0.531286	1.27208	0.32506	159.102	133.464	0.345073	HMDB0001954	C20793	Organic acids and derivatives	Hydroxy acids and derivatives	Medium-chain hydroxy acids and derivatives	139.285	10	10	70588.5	19384.2	48841.4	49893	31223.7	59055.8	21218.3	80646.4	10365	35213.1	46086.3	27789.9	22469.6	49002.4	67976.6	52892.7	48768.6	58119.3	45871.7	50068.2	31357.4	30610	47560.7	24969.1	31409	35046.2	34076.8	38534.4	31392.7	26953.6	83830.3	26801.9	46684.6
M467T39	[M-H]-	3'-hydroxyrepaglinide	1.82702	1.03363	0.906183	467.278	39.236	0.232513	HMDB0060979		Organoheterocyclic compounds	Piperidines	Phenylpiperidines	46.009	9	8	65565.6	178008	125558	258911	248584	385973	211101	350601	79478.2	235656	443852	175484	177604	714201	267528	248544	300888	413301	292315	635087	340513	285337	124767	246922	489791	284782	287106	258925	166288	279423	289294	241083	273708
M519T31	[M-H]-	3-hydroxystanozolol glucuronide	0.844113	0.933326	0.69946	519.278	30.895	4.27853			Lipids and lipid-like molecules	Steroids and steroid derivatives	Steroidal glycosides	34.025	9	10	56816.9	374196	59214.2	79828.5	85991.8	97616.5	119808	98240.5	89152.2	94331.5	98535.5	182987	224818	72190	38838.9	84398.4	125305	85433.2	131381	61063.4	128411	102303	68804.6	130844	68693	113631	95573.7	52890.6	104871	87903.9	127415	120698	80123.2
M387T285	[M-H]-	3-isoxazolecarboxamide, 5-(5-chloro-2,4-dihydroxyphenyl)-n-ethyl-4-(4-methoxyphenyl)-	0.516768	1.41784	0.429869	387.061	285.046	2.09846			Benzenoids	Phenols	Benzenediols	316.119	10	10	13050.1	8828.75	31105.6	18973.2	11333.2	82069.9	39399	15463.8	37008.6	16421.1	15841.1	7521.49	27507.7	19428.4	22869.8	15889	16386.6	17887.3	41123.8	19949.2	14554.1	9708.25	19690.5	24072.5	129645	14378.1	10630.2	20144.4	15758.3	19152.5	22202.6	24068.7	15028
M263T36	[M-H]-	3-methoxy-4-hydroxyphenylglycol sulfate	3.25997	0.207055	0.190148	263.023	35.686	0.414001	HMDB0003332		Benzenoids	Phenols	Methoxyphenols	48.503	8	7	1.18305e+06	53161	1.05713e+06	38387.6	777598	26165.3	558113	112771	16042.7	230661	68175.7	120519	179635	139228	2.98183e+06	165449	198930	17093.2	142896	686024	49494.5	106636	326451	128454	115490	163928	213090	86187.6	106156	116573	183135	85674.2	230432
M156T203	[M-H]-	3-methylcrotonylglycine	0.492313	0.288469	0.117737	156.066	203.319	2.56395	HMDB0000459		Organic acids and derivatives	Carboxylic acids and derivatives	Amino acids, peptides, and analogues	209.367	8	7	7675.71	4532.23	12372.1	6348.34	10374.9	3929.61	18214.4	4899.12	3486.39	12632.5	6247.11	5466.96	2802.63	15051.8	62040	6700.64	4419.13	3468.37	3404.52	31837	4661.06	6311.99	27753.8	3208.46	5907.62	3091.71	3106.38	5966.5	1931.27	3620.87	3260.3	3768.35	7051.17
M108T45	[M-H-NO]-	3-nitrophenol	0.532608	0.97843	0.877629	108.045	44.5435	0.187484		C14418	Benzenoids	Phenols	Nitrophenols	48.503	10	10	158838	67069.3	94072.1	99233.2	87809.6	135456	110271	101972	81044.3	82583	174557	113193	139165	111097	181039	139139	112434	155412	111401	129552	105029	109167	126433	88444.2	90483.7	72676.3	90235.2	85434	107043	141695	110991	156023	85305
M224T105	[M-H]-	3-(n-morpholino)-2-hydroxypropanesulfonic acid	0.61011	0.678115	0.24794	224.06	104.685	0.510058			Organoheterocyclic compounds	Oxazinanes	Morpholines	121.349	6	7	174035	32918.3	81544.1	36042.4	47934.5	42061.1	79881	23683.2	11266	80465.8	46313.6	153076	36726.6	15691	180260	49097.7	38272.6	37266.5	97139.3	63811.4	50677.6	30556.4	30695.4	34300.4	31573.6	43598.4	30054.5	37191	33857.9	45803.9	75529.7	48442.9	31367.6
M573T400	[M-H]-	3'-o-desmethyletoposide	0.101357	0.873537	0.657426	573.185	400.086	1.23307			Lignans, neolignans and related compounds	Lignan lactones	Podophyllotoxins	414.56	9	8	5082.49	28513.8	6719.64	16574.8	26176.2	29385.3	13623.4	27872.6	4281.55	20738.8	18921.4	12619.9	6374.14	9098.55	13656.5	26752.1	9147.41	15624.2	38987.8	5820.03	29254.6	16186.2	12840.2	7120.62	9758.62	4973.49	1082.8	23363.5	7217.05	22755.4	6865.75	11763.9	18082.8
M632T364	[M-H]-	3'-sialyllactose	0.119289	0.722561	0.0947012	632.206	364.257	2.01109			Organic oxygen compounds	Organooxygen compounds	Carbohydrates and carbohydrate conjugates	367.261	6	6	7166.71	4374.9	2024.63	14477.3	5660.09	3210.54	2541.4	5071.11	2695.46	3986.13	4412.36	2356.86	1366.29	2125.17	3575.94	7476.22	2645.03	2647.84	2936.28	2604.35	2742.14	1971.67	2060.37	2548.55	3045.29	3218.48	3789.51	5212.29	2632.96	5167.04	2295.1	6128.96	5556.09
M189T200	[M-H]-	3-(trifluoromethyl)benzoic acid	0.172462	0.904767	0.381013	189.031	199.707	1.75691			Benzenoids	Benzene and substituted derivatives	Trifluoromethylbenzenes	210.852	10	10	14665.1	6717.24	15182.9	11130.2	11521.5	12631.8	13205	13684	7007.52	11698.8	11064.6	12399.7	6300.93	9855.51	15664.4	9542.7	11569.3	11672.4	11727.2	17219.3	12662.2	9195.56	14658.5	13379.2	9190.32	11652.9	10072.6	11869.3	9255.85	11642.6	10259.1	10118.7	10790.9
M131T326	[M-H]-	3-ureidopropionic acid	0.327537	1.03707	0.918231	131.035	326.491	1.53049	HMDB0000026	C02642	Organic acids and derivatives	Organic carbonic acids and derivatives	Ureas	328.868	10	7	31427.6	43306.6	27494.1	259975	38665.1	155995	124499	102213	22748.5	85939	75584	48221.5	27019.1	37057.3	67228.3	91072.9	34023	69932.3	165362	46831.7	160493	59687.8	85766.3	47301.4	46503.8	21784.6	23028.2	168020	31582.7	97249.4	28171	35098.4	64873.2
M303T50_2	[M-H]-	4-(2,3-dihydroxy-3-methylbutoxy)furo(3,2-g)chromen-7-one	1.81828	1.11902	0.532596	303.091	49.8395	2.33533			Phenylpropanoids and polyketides	Coumarins and derivatives	Furanocoumarins	60.153	10	10	274642	713514	220885	505800	344088	432100	404184	569189	115990	480501	493413	406215	583360	435654	442546	393090	580126	826342	582394	558260	491674	745428	260501	435579	512874	766256	266176	486426	475516	436677	699374	588610	353730
M237T82	[M-H]-	4-(2-hydroxyethyl)piperazine-1-ethanesulfonic acid	0.627823	1.02069	0.939282	237.08	81.799	1.34306	HMDB0062295		Organoheterocyclic compounds	Diazinanes	Piperazines	97.28	9	6	111851	56789.8	215539	191994	69516.2	141787	187958	272937	85545.2	189177	267121	253052	290412	173698	212401	151004	271060	221315	146195	168121	357902	155550	75340.6	113899	336449	192862	109440	101952	237553	385243	293429	239770	142747
M283T157	[M-H]-	4,6'-dimethoxy-2'-hydroxychalcone	0.169282	1.10287	0.652622	283.097	157.215	1.64692			Phenylpropanoids and polyketides	Linear 1,3-diarylpropanoids	Chalcones and dihydrochalcones	181.921	6	9	12599.6	25201.8	20111.3	23905.3	15370.2	18027.4	54075.8	13184.5	25475	28133.3	4474.61	31763.5	18926.7	7882.98	36614	28443.5	21911.9	23620.5	34272.6	16225.6	38059.4	25685.7	13259.4	34092.1	8926.24	31978.7	15809.2	19156.3	26645.7	32967.9	26547.8	12002	11894.5
M234T338	[M-H]-	4-chloro-3-sulfamoylbenzoic acid	0.478141	0.14603	0.17887	233.985	338.342	0.809346			Benzenoids	Benzene and substituted derivatives	Benzenesulfonamides	344.403	7	7	84278.6	1703.62	86205.5	1244.15	4083.57	1504.04	2655.87	1399.05	12297.3	882.344	600.052	786.997	1326.37	715.651	2300.24	1526.28	1628.41	1261.96	629.881	1446.42	633.93	1184.11	1343.68	1576.91	537.354	334.339	32836.3	839.244	575.594	1067.79	1510.55	3438.39	1362.06
M343T55	[M-H]-	4-hydroxy-5e,7z,10z,13z,16z,19z-docosahexaenoic acid	0.750842	0.849441	0.322524	343.228	54.639	3.24823			Lipids and lipid-like molecules	Fatty Acyls	Fatty acids and conjugates	71.662	9	10	314811	203384	211017	216933	192644	250672	249522	171411	470300	358358	257440	457977	239467	174591	245910	237028	253704	246790	266128	171087	227341	228737	122354	286420	174825	168803	161140	288921	196338	225045	294535	202434	217391
M121T39	[M-H]-	4-hydroxybenzaldehyde	0.735185	0.796967	0.326098	121.029	38.9685	4.65532	HMDB0011718	C00633	Organic oxygen compounds	Organooxygen compounds	Carbonyl compounds	55.54	10	10	265586	497812	164364	234562	759070	276218	708891	287058	348768	242709	419811	359672	386883	427786	347730	156542	303873	399721	229611	287738	298020	395683	221025	134672	327310	197623	267884	295279	261104	504239	89567	524364	427638
M310T31_1	[M-H]-	4'-hydroxydiclofenac	1.04023	1.05273	0.809608	309.985	30.9215	1.20204	HMDB0013974		Benzenoids	Benzene and substituted derivatives	Halobenzenes	32.919	10	10	14796.4	12200.2	7746.78	154151	2287.94	233723	121355	195708	75191.3	112570	197126	86830.1	122956	144739	125205	129216	193651	174164	120016	54637.2	165434	61027.7	109202	184054	31836.1	69269.9	8139.2	140962	155447	102833	135449	130614	149868
M162T48	[M-H]-	4-hydroxy-l-glutamic acid	1.20599	0.390255	0.21058	162.056	48.472	0.406105		C05947	Organic acids and derivatives	Carboxylic acids and derivatives	Amino acids, peptides, and analogues	51.695	10	9	29167.2	30719.2	307602	18609.8	73804.9	17828.1	137603	20628.2	309453	103625	143760	27510.8	103971	975498	586988	12176	35452	19478.3	46169.7	216887	21201.2	105125	119892	22220.6	20947	153713	8545.55	36553.3	7857.84	22265.4	31124.6	18248	43398.3
M151T147	[M-H]-	4-hydroxyphenylacetic acid	0.402659	0.314591	0.162993	150.989	147.279	2.96832	HMDB0000020	C00642	Benzenoids	Phenols	1-hydroxy-2-unsubstituted benzenoids	153.634	10	9	62768	2259.89	2993.19	3371.43	2527.08	6925.66	26786.8	4128.48	687.907	19987.1	7004.6	11845	5506.19	12846	54242.9	9321.64	570.244	2230.94	1367.04	42873.6	3415.34	2387.86	22098.2	1765.91	3385.77	2808.16	1735.75	4623.83	2389.33	3038.99	9793.14	1813.23	5446.97
M138T339	[M-H]-	4-nitrophenol	0.31586	0.495596	0.121858	138.042	339.303	1.48786	HMDB0001232	C00870	Benzenoids	Phenols	Nitrophenols	341.391	8	6	13986.9	13061.4	12560.4	12232.9	12439.8	4005.94	1894.34	3090.81	1895.64	2417.14	2860.67	1691.44	3101.4	2750.75	2137.29	1713.65	2937.24	2885.99	3263.6	12537	2399.03	2962.46	12121.6	3197.03	12133.2	1880.98	656.39	13013.7	2197.54	1648.15	2911.43	13681.1	3447.66
M411T71	[M-H]-	4-pregnen-17.alpha., 20.beta.-diol-3-one-20-sulfate	0.155458	0.874303	0.653231	411.163	71.277	3.33651			Lipids and lipid-like molecules	Steroids and steroid derivatives	Sulfated steroids	84.451	5	4	6950.87	6700.58	35467	21361.5	55714.4	10792.6	19543.8	12039.1	19657.8	55358.3	20171.8	45896	55234.6	43943.9	56751.3	37985	9512.23	6779.9	53530.3	21159.7	12205.3	17107.7	6495.56	49019.4	47928.7	16544.3	3010.71	38880.2	13497.5	32926.1	15219.6	56628.5	9744.82
M182T45	[M-H]-	4-pyridoxic acid	1.25455	0.911399	0.423325	182.046	44.5275	9.14775	HMDB0000017	C00847	Organoheterocyclic compounds	Pyridines and derivatives	Pyridinecarboxylic acids and derivatives	48.503	10	10	1.68184e+06	719706	1.19147e+06	1.61109e+06	1.15469e+06	1.89399e+06	1.37239e+06	1.5649e+06	1.16415e+06	1.28822e+06	1.77636e+06	1.15103e+06	1.91445e+06	2.14816e+06	2.5899e+06	1.92828e+06	1.69779e+06	2.23892e+06	1.57947e+06	1.64917e+06	1.36581e+06	1.38051e+06	1.87591e+06	1.82723e+06	1.45955e+06	1.09763e+06	1.45441e+06	1.79258e+06	1.34521e+06	1.48109e+06	1.48927e+06	1.90955e+06	1.93909e+06
M456T346	[M-H]-	5,10-methylene-thf	0.098193	1.02716	0.910239	456.154	346.32	1.65975	HMDB0001533	C00143				354.856	8	6	3616.86	2664.46	1332.87	5912.68	3410.38	3975.98	3059.35	5848.64	1376.61	2706.04	4365.03	10176.6	1981.38	3002.34	1790.73	2081.73	4113.26	7357.96	6864.72	3604.09	3721.72	2709.77	3048.2	2424.67	3708.99	2396.13	1999.54	7271.75	4214.84	8679.45	5620.95	5715.86	3009
M301T192_2	[M-H-H2O]-	5,8,11,14-eicosatetraenoic acid, 16-hydroxy-, (5z,8z,11z,14z,16r)-	0.257658	0.915048	0.546627	301.202	192.161	1.15273			Lipids and lipid-like molecules	Fatty Acyls	Eicosanoids	199.104	8	7	95067.6	39428.7	29699.6	41875	58247.6	55639	43182.9	29029.5	28410.5	47810.7	54570.6	73784.2	61118	62293.5	45557.5	59070.6	39457.4	64504.9	40007.4	65117.8	56434.8	41783	25358.4	26206.1	88410.9	43046.9	51616.5	46175.1	25088.9	52531.8	47444.2	77101.8	51904.1
M467T147_2	[M-H]-	5.alpha.-androstan-3.alpha.,17.beta.-diol-o-3-.beta.-glucuronic acid	4.72369	0.862217	0.610601	467.278	147.479	2.84782			Lipids and lipid-like molecules	Steroids and steroid derivatives	Steroidal glycosides	155.126	10	10	1.17601e+06	2.74602e+06	788279	3.20534e+06	2.04131e+06	4.55385e+06	3.55841e+06	5.70903e+06	1.20301e+06	3.377e+06	6.72748e+06	2.59901e+06	2.64465e+06	9.24151e+06	5.87776e+06	3.33644e+06	4.93309e+06	6.6628e+06	3.84949e+06	7.72678e+06	4.71069e+06	3.71423e+06	1.63008e+06	2.85697e+06	6.27159e+06	3.96666e+06	2.17491e+06	3.546e+06	2.54815e+06	4.2377e+06	4.17763e+06	2.80663e+06	2.91982e+06
M222T56	[M-H]-	5-aminonaphthalene-2-sulfonic acid	0.578824	0.746107	0.25781	222.023	56.2055	1.70137		C06152	Benzenoids	Naphthalenes	Naphthalene sulfonic acids and derivatives	66.8	9	6	4646.96	6977.44	24328.5	96550	27181.5	58791.2	104085	120591	23317.4	95945.2	126337	77965.5	225942	81456.9	118135	100860	149100	221525	106622	49811.3	64689.9	76488.9	46710.2	123554	59837.6	86645	12155.7	133030	69716.9	88559.7	108747	71532.1	80548.3
M152T317	[M-H]-	5-aminosalicylic acid	0.254268	1.02151	0.899568	152.035	317.303	1.98829	HMDB0014389	C07138	Benzenoids	Benzene and substituted derivatives	Benzoic acids and derivatives	323.437	6	6	9544.71	12743.1	9916.01	25725.6	10004.4	27501.8	8814.55	13979.9	15390.9	11989.2	11791.3	14784.6	9964.3	10496.2	12326.8	12544.9	26956.9	26966.7	10074.4	10904.3	11766.2	10572.8	13680.1	13183.6	10541.9	16394.4	12216.1	13465.6	11689.2	18935.2	12311.4	21356.4	10845.5
M381T27	[M-H-HF]-	5-heptenoic acid, 7-[(1r,2r,3s,5s)-2-[(1e,3s)-3-(2,3-dihydro-1h-inden-2-yl)-3-hydroxy-1-propen-1-yl]-3-fluoro-5-hydroxycyclopentyl]-, (5z)-	0.662085	0.967166	0.921822	381.232	26.806	0.488636			Lipids and lipid-like molecules	Fatty Acyls	Fatty acids and conjugates	37.86	9	10	34417.7	46085	40635.1	44806	38254.9	140069	43309	68409.7	62402.5	69351.3	88277	42506.5	107640	281242	52635.8	75177.4	63904.9	110380	48494.9	47839.2	49336.8	46733.8	64504.4	112334	93979.4	58704	96482.5	58729.2	57720.8	57489.7	69507.3	41932.8	69670.5
M267T124	[M-H-C7H5NO]-	5-heptenoic acid, 7-[(1s,2r,3r,4r)-3-[[2-[(phenylamino)carbonyl]hydrazinyl]methyl]-7-oxabicyclo[2.2.1]hept-2-yl]-, (5z)-	0.648065	1.04261	0.913155	267.16	124.346	1.31491			Benzenoids	Benzene and substituted derivatives	N-phenylureas	129.019	7	7	171830	31082.9	80352.1	89677.9	54964.3	36125.8	47541.7	85986.2	22884.2	39857.6	69769.9	28644.6	35160.2	100878	46208.7	47810.6	56875.7	161750	112337	297908	41560.2	129957	32603.1	29354.9	235088	25965.8	132496	34982.8	30567.7	93602.4	49367.2	102949	110159
M131T236	[M-H]-	5-Hydroxyhexanoic acid	0.473491	0.664782	0.12254	131.071	236.337	2.35129						239.055	8	10	35829	9351.16	21055.2	9950.95	31932.7	10039.9	8085.18	14805.7	22108.6	6816.26	14687.8	15784.9	9421.02	28447.1	16654.2	17228.2	15991.7	21045.7	8247.61	31586.9	10091.8	10544.1	15687.4	5150.19	24873.8	6788.49	20000	8072.45	7307.19	9569.29	13429.6	19995.8	10530.2
[truncated: 463 more rows]
[truncated: 26 more columns]

## Sheet: ACBP-OXA_vs_C-2
ID	adduct	Name	VIP	Fold change	p-value	m/z	rt(s)	PPM	HMDB	KEGG	SuperClass	Class	SubClass	rtmax	ACBP.OXA	C.2	P-21-4	AC-14-4	AC-15-4	AC-17-4	C-4-2	AC-12-4	AO-43-4	AC-13-4	C-1-2	P-24-4	AO-45-4	AO-47-4	C-9-2	C-8-2	C-7-2	AO-50-4	AC-20-4	AO-49-4	AO-44-4	P-29-4	O-39-4	AO-46-4	AO-42-4	O-38-4	O-40-4	AC-18-4	P-23-4	P-27-4	O-36-4	AO-48-4	O-34-4	C-3-2	AC-11-4
[truncated: 9,565 more rows]
[truncated: 26 more columns]
